# Supplementary material for: wSDTNBI: a novel network-based inference method for virtual screening
Source: Royal Society of Chemistry journal article supplement (doi:10.1039/d1sc05613a), 2021-12-21
Supplement: d1sc05613a1.xlsx [file d1sc05613a1.xlsx]

## Sheet: Drug information
Drug ID	SMILES (original)	SMILES (standardized)	MW	LogP	nC	External link	Name	Type	CASRN	ATC code	Comment
D-00010	C=CC=O (IUPHAR:2418)|O=CC=C (TTD:D0I0AA)	C=CC=O	56.0633	0.3713	3	IUPHAR:2418|TTD:D0I0AA	acrolein (IUPHAR:2418)				Synthetic organic (IUPHAR:2418)
D-00021	CC(N)=O (DrugBank:DB02736)|CC(=O)N (IUPHAR:4661)|O=C(N)C (TTD:D0S6KY)	CC(=O)N	59.0672	0.1919	2	DrugBank:DB02736|IUPHAR:4661|TTD:D0S6KY	Acetamide (DrugBank:DB02736)|acetamide (IUPHAR:4661)|acetamide (TTD:D0S6KY)	Experimental (DrugBank:DB02736)	60-35-5 (DrugBank:DB02736)		Synthetic organic (IUPHAR:4661)
D-00026	CC(O)=O (DrugBank:DB03166)|CC(=O)O (IUPHAR:1058)|C(=O)(C)O (KEGG:D00010)|OC(=O)C (TTD:D04CRL)|OC(=O)C (TTD:D0F1LZ)	CC(=O)O	60.052	0.0909	2	DrugBank:DB03166|IUPHAR:1058|KEGG:D00010|TTD:D04CRL|TTD:D0F1LZ	Acetic acid (DrugBank:DB03166)|acetic acid (IUPHAR:1058)|Acetic acid, glacial (USP) (KEGG:D00010)|Glatiramer Acetate (TTD:D04CRL)|Acetic Acid, Glacial (TTD:D0F1LZ)	Approved (DrugBank:DB03166)	64-19-7 (DrugBank:DB03166)|64-19-7 (KEGG:D00010)	G01AD02; S02AA10 (DrugBank:DB03166)|G01AD02; S02AA10 (KEGG:D00010)	Used to treat infections in the ear canal. (DrugBank:DB03166)|Metabolite (IUPHAR:1058)|Emollient, Pharmaceutic aid (acidifying, flavor, lavage) (KEGG:D00010)|Multiple scierosis (TTD:D04CRL)|Infections in the ear canal (TTD:D0F1LZ)
D-00029	NCCN (DrugBank:DB14189)|NCCN (KEGG:D01114)|NCCN (TTD:D0WT6A)	NCCN	60.0983	0.3044	2	DrugBank:DB14189|KEGG:D01114|TTD:D0WT6A	Ethylenediamine (DrugBank:DB14189)|Ethylenediamine (USP/JP17) (KEGG:D01114)	Approved; Experimental (DrugBank:DB14189)	107-15-3 (DrugBank:DB14189)|107-15-3 (KEGG:D01114)		Ethylenediamine is approved for use within allergenic epicutaneous patch tests which are indicated for use as an aid in the diagnosis of allergic contact dermatitis (ACD) in persons 6 years of age and older. (DrugBank:DB14189)|Pharmaceutic aid (chelating, stabilizing) (KEGG:D01114)|Tuberculosis (TTD:D0WT6A)
D-00040	NC(=O)C=C (IUPHAR:4553)|O=C(N)C=C (TTD:D0L0SP)	NC(=O)C=C	71.0779	0.358	3	IUPHAR:4553|TTD:D0L0SP	acrylamide (IUPHAR:4553)				Synthetic organic (IUPHAR:4553)
D-00060	C[N+](C)(C)C (DrugBank:DB03095)|[N+](C)(C)(C)C (TTD:D0T9SK)	C[N+](C)(C)C	74.1448	0.3224	4	DrugBank:DB03095|TTD:D0T9SK	Tetramethylammonium Ion (DrugBank:DB03095)	Experimental (DrugBank:DB03095)
D-00061	CC(=O)NO (DrugBank:DB00551)|C(=O)(NO)C (KEGG:D00220)|ONC(=O)C (TTD:D0R9BG)	CC(=O)NO	75.0666	-0.0974	2	DrugBank:DB00551|KEGG:D00220|TTD:D0R9BG	Acetohydroxamic acid (DrugBank:DB00551)|Acetohydroxamic acid (USP/INN) (KEGG:D00220)|Acetohydroxamic Acid (TTD:D0R9BG)	Approved (DrugBank:DB00551)	546-88-3 (DrugBank:DB00551)|546-88-3 (KEGG:D00220)	G04BX03 (DrugBank:DB00551)|G04BX03 (KEGG:D00220)	Used, in addition to antibiotics or medical procedures, to treat chronic urea-splitting urinary infections. (DrugBank:DB00551)|Antibacterial (adjunct), Urease inhibitor (KEGG:D00220)|Urinary tract infections (TTD:D0R9BG)
D-00083	ClCC1OC1.[nH]1c(ncc1)C (TTD:D08ZFJ)	Cc1ncc[nH]1	82.1038	0.7181	4	TTD:D08ZFJ	Colestilan (TTD:D08ZFJ)				Diabetes (TTD:D08ZFJ)
D-00085	CC/C=C/C=O (IUPHAR:2417)|O=C/C=C/CC (TTD:D08MUZ)	CC/C=C/C=O	84.1164	1.1515	5	IUPHAR:2417|TTD:D08MUZ	2-pentenal (IUPHAR:2417)				Synthetic organic (IUPHAR:2417)
D-00108	[O-]C(=O)C(=O)[O-] (IUPHAR:4538)|[O-]C(=O)C(=O)[O-].C(=O)(C(=O)[O-])[O-].O=C(C(=O)[O-])[O-].[Ce+3].[Ce+3] (KEGG:D07103)|[O-]C(=O)C(=O)[O-] (TTD:D01FAR)	[O-]C(=O)C(=O)[O-]	88.019	-3.5138	2	IUPHAR:4538|KEGG:D07103|TTD:D01FAR	oxalate (IUPHAR:4538)|Cerium oxalate (KEGG:D07103)|oxalate (TTD:D01FAR)		139-42-4 (KEGG:D07103)	A04AD02 (KEGG:D07103)	Metabolite (IUPHAR:4538)|Anti-emetic (KEGG:D07103)
D-00115	CCCC(O)=O (DrugBank:DB03568)|CCCC(=O)O (IUPHAR:1059)|OC(=O)CCC (TTD:D0T4JQ)	CCCC(=O)O	88.1051	0.8711	4	DrugBank:DB03568|IUPHAR:1059|TTD:D0T4JQ	Butyric Acid (DrugBank:DB03568)|butyric acid (IUPHAR:1059)	Experimental; Investigational (DrugBank:DB03568)	107-92-6 (DrugBank:DB03568)		Metabolite (IUPHAR:1059)
D-00136	OC(CO)C=O (TTD:D09PNQ)	OC(C=O)CO	90.0779	-1.4615	3	TTD:D09PNQ
D-00146	NCCCON (IUPHAR:5139)|O(N)CCCN (TTD:D01IGU)|O(N)CCCN (TTD:D0F1ZX)|Cl.O(N)CCCN (TTD:D0K6WI)	NCCCON	90.1243	0.6261	3	IUPHAR:5139|TTD:D01IGU|TTD:D0F1ZX|TTD:D0K6WI	APA (IUPHAR:5139)|APA (TTD:D01IGU)				Synthetic organic (IUPHAR:5139)
D-00148	NOCC(O)=O (DrugBank:DB02079)|NOCC(=O)O (IUPHAR:5136)|O(N)CC(=O)O (TTD:D01BTV)|O(N)CC(=O)O (TTD:D0L9AL)	NOCC(=O)O	91.066	-0.3384	2	DrugBank:DB02079|IUPHAR:5136|TTD:D01BTV|TTD:D0L9AL	Aminooxyacetic acid (DrugBank:DB02079)|aminooxyacetic acid (IUPHAR:5136)|aminooxyacetic acid (TTD:D01BTV)	Experimental (DrugBank:DB02079)	645-88-5 (DrugBank:DB02079)		Metabolite (IUPHAR:5136)
D-00151	CC1=CC=CC=C1 (DrugBank:DB11558)|Cc1ccccc1 (IUPHAR:5481)|c1(ccccc1)C (TTD:D0T0HH)	Cc1ccccc1	92.1384	1.995	7	DrugBank:DB11558|IUPHAR:5481|TTD:D0T0HH	Toluene (DrugBank:DB11558)|toluene (IUPHAR:5481)|toluene (TTD:D0T0HH)	Vet_approved (DrugBank:DB11558)	108-88-3 (DrugBank:DB11558)		Used for the removal of ascarids (Toxocara canis and Toxascaris leonina) and hookworms (Ancylostoma caninum and Uncinaria stenocephala) and as an aid in removing tapeworms (Taenia pisiformis, Dipylidium caninum, and Echinococcus granulosus) from dogs and cats. (DrugBank:DB11558)|Synthetic organic (IUPHAR:5481)
D-00158	OC1=CC=CC=C1 (DrugBank:DB03255)|c1(ccccc1)O (KEGG:D00033)|c1(ccccc1)O.O (KEGG:D06534)	Oc1ccccc1	94.1112	1.3922	6	DrugBank:DB03255|KEGG:D00033|KEGG:D06534	Phenol (DrugBank:DB03255)|Phenol (JP17/USP) (KEGG:D00033)|Phenolated water (JP17) (KEGG:D06534)	Approved; Experimental (DrugBank:DB03255)	108-95-2 (DrugBank:DB03255)|108-95-2 (KEGG:D00033)	C05BB05; D08AE03; N01BX03; R02AA19 (DrugBank:DB03255)|C05BB05; D08AE03; N01BX03; R02AA19 (KEGG:D00033)|C05BB05; D08AE03; N01BX03; R02AA19 (KEGG:D06534)	Phenol is primarily indicated for minor sore throat pain, sore mouth, minor mouth irritation, and pain associated with canker sores. Additionally, phenol is indicated in the treatment of focal spasticity. (DrugBank:DB03255)|Analgesic, Anesthetic (oral), Antipruritic, Disinfectant, Hemorrhoid agent (sclerosing), Pharmaceutic aid (preservative) (KEGG:D00033)|Disinfectant (topical) (KEGG:D06534)
D-00159	n1c(N)cccc1 (TTD:D07PYV)	Nc1ccccn1	94.1145	1.245	5	TTD:D07PYV
D-00160	NC1=CC=NC=C1 (DrugBank:DB06637)|Nc1ccncc1 (IUPHAR:2416)|c1cnccc1N (KEGG:D04127)|Nc1ccncc1 (TTD:D08YIN)	Nc1ccncc1	94.1145	1.245	5	DrugBank:DB06637|IUPHAR:2416|KEGG:D04127|TTD:D08YIN	Dalfampridine (DrugBank:DB06637)|fampridine (IUPHAR:2416)|Dalfampridine (USAN) (KEGG:D04127)|Dalfampridine (TTD:D08YIN)	Approved (DrugBank:DB06637)|Approved (IUPHAR:2416)	504-24-5 (DrugBank:DB06637)|504-24-5 (KEGG:D04127)	N07XX07 (DrugBank:DB06637)|N07XX07 (KEGG:D04127)	Dalfampridine is a neurofunctional modifier that helps improve walking speed in patients with multiple sclerosis (MS). (DrugBank:DB06637)|Synthetic organic (IUPHAR:2416)|Convulsant inducer, Potassium channel blocker (KEGG:D04127)|Multiple scierosis (TTD:D08YIN)
D-00164	N1(CCCC1)C#N (TTD:D00FGA)	N#CN1CCCC1	96.1304	0.50118	5	TTD:D00FGA
D-00168	N1=C(N)CC(C1)C (TTD:D0J7NS)	CC1CC(=NC1)N	98.1463	0.5193	5	TTD:D0J7NS
D-00169	N1=C(N)CCC1C (TTD:D0D9LT)	CC1CCC(=N1)N	98.1463	0.6618	5	TTD:D0D9LT
D-00170	N1=C(N)C(CC1)C (TTD:D0X6MB)	NC1=NCCC1C	98.1463	0.5193	5	TTD:D0X6MB
D-00171	N1=C(N)CCCC1 (TTD:D0D0TO)	NC1=NCCCC1	98.1463	0.6634	5	TTD:D0D0TO
D-00178	C=CCN=C=S (IUPHAR:2420)|C(=C)CN=C=S (KEGG:D02818)|S=C=NCC=C (TTD:D0BQ8Y)	C=CCN=C=S	99.1542	1.2752	4	IUPHAR:2420|KEGG:D02818|TTD:D0BQ8Y	allyl isothiocyanate (IUPHAR:2420)|Allyl isothiocyanate (USP) (KEGG:D02818)		57-06-7 (KEGG:D02818)		Synthetic organic (IUPHAR:2420)|Repellent (KEGG:D02818)|Rubefacient (TTD:D0BQ8Y)
D-00187	O1CCCN=C1N (TTD:D0M4BM)	NC1=NCCCO1	100.119	-0.1427	4	TTD:D0M4BM
D-00203	NC1(CC1)C(O)=O (DrugBank:DB02085)	OC(=O)C1(N)CC1	101.104	0.2626	4	DrugBank:DB02085	1-Aminocyclopropanecarboxylic Acid (DrugBank:DB02085)	Experimental (DrugBank:DB02085)	22059-21-8 (DrugBank:DB02085)
D-00213	[O-]C(=O)CC([O-])=O (DrugBank:DB02201)|[Sr++].[O-]C(=O)CC([O-])=O (DrugBank:DB05732)|[Sr+2].[O-]C(=O)CC(=O)[O-] (TTD:D0IL3O)	[O-]C(=O)CC(=O)[O-]	102.046	-3.1237	3	DrugBank:DB02201|DrugBank:DB05732|TTD:D0IL3O	Malonate Ion (DrugBank:DB02201)|Strontium malonate (DrugBank:DB05732)|Strontium malonate (TTD:D0IL3O)	Experimental (DrugBank:DB02201)|Investigational (DrugBank:DB05732)	183133-72-4 (DrugBank:DB05732)		Investigated for use/treatment in osteoporosis. (DrugBank:DB05732)|Metabolic bone disease (TTD:D0IL3O)
D-00218	N[C@@H]1CONC1=O (DrugBank:DB00260)|N[C@@H]1CONC1=O (IUPHAR:9489)|C1ONC(=O)[C@@H]1N (KEGG:D00877)|O1NC(=O)[C@H](N)C1 (TTD:D02WFK)|O1NC(=O)[C@H](N)C1 (TTD:D04TMQ)|O1NC(=O)[C@H](N)C1 (TTD:D0G6RT)	N[C@@H]1CONC1=O	102.092	-0.5958	3	DrugBank:DB00260|IUPHAR:9489|KEGG:D00877|TTD:D02WFK|TTD:D04TMQ|TTD:D0G6RT	Cycloserine (DrugBank:DB00260)|D-cycloserine (IUPHAR:9489)|Cycloserine (JP17/USP/INN) (KEGG:D00877)|Cycloserine (TTD:D02WFK)|D-cycloserine (TTD:D04TMQ)	Approved (DrugBank:DB00260)|Approved (IUPHAR:9489)	68-41-7 (DrugBank:DB00260)|68-41-7 (KEGG:D00877)	J04AB01 (DrugBank:DB00260)|J04AB01 (KEGG:D00877)	Used in combination with up to 5 other drugs as a treatment for Mycobacterium avium complex (MAC) and is also used to treat tuberculosis (TB). (DrugBank:DB00260)|Synthetic organic (IUPHAR:9489)|Antibacterial (tuberculostatic), Cell wall biosynthesis inhibitor (KEGG:D00877)|Dementia; Tuberculosis (TTD:D02WFK)|Bacterial infections; Obsessive compulsive disorder (TTD:D04TMQ)
D-00227	C[N+](C)(C)CC=O (DrugBank:DB04401)	O=CC[N+](C)(C)C	102.155	-0.1085	5	DrugBank:DB04401	[Formylmethyl]Trimethyl-Ammonium, N,N,N-Trimethylammonium Acetaldehyde (DrugBank:DB04401)	Experimental (DrugBank:DB04401)
D-00228	NC1=NCCS1 (DrugBank:DB02335)|S1CCN=C1N (TTD:D01ILO)|S1CCN=C1N (TTD:D02XHB)	NC1=NCCS1	102.158	0.1838	3	DrugBank:DB02335|TTD:D01ILO|TTD:D02XHB	2-Aminothiazoline (DrugBank:DB02335)	Experimental (DrugBank:DB02335)	1779-81-3 (DrugBank:DB02335)
D-00229	NCCCCCN (DrugBank:DB03854)|NCCCCCN (TTD:D02QGI)	NCCCCCN	102.178	1.4747	5	DrugBank:DB03854|TTD:D02QGI	Pentane-1,5-Diamine (DrugBank:DB03854)	Experimental (DrugBank:DB03854)
D-00239	NCCCC(O)=O (DrugBank:DB02530)|NCCCC(=O)O (IUPHAR:1067)|NCCCC(=O)O (IUPHAR:5410)|C(C(=O)O)CCN (KEGG:D00058)|OC(=O)CCCN (TTD:D0C9XA)|OC(=O)CCCN (TTD:D0D3ID)	NCCCC(=O)O	103.12	0.5102	4	DrugBank:DB02530|IUPHAR:1067|IUPHAR:5410|KEGG:D00058|TTD:D0C9XA|TTD:D0D3ID	gamma-Aminobutyric acid (DrugBank:DB02530)|GABA (IUPHAR:1067)|[<sup>3</sup>H]GABA (IUPHAR:5410)|gamma-Aminobutyric acid (JAN) (KEGG:D00058)	Approved; Investigational (DrugBank:DB02530)|Labelled; Radioactive (IUPHAR:5410)	56-12-2 (DrugBank:DB02530)|56-12-2 (KEGG:D00058)	N03AG03 (KEGG:D00058)	Metabolite (IUPHAR:1067)|Synthetic organic (IUPHAR:5410)|Brain metabolism enhancer, Neurotransmitter (KEGG:D00058)|Crohn's disease; Inflammatory bowel disease (TTD:D0C9XA)
D-00244	N(CCN)CCN (TTD:D09WVV)	NCCNCCN	103.166	0.2849	4	TTD:D09WVV
D-00252	C[N+](C)(C)CCO (DrugBank:DB00122)|OCC[N+](C)(C)C (IUPHAR:4551)|C[N+](CCO)(C)C (KEGG:D07690)|OCC[N+](C)(C)C (TTD:D08DAE)|[I-].OCC[N+](C)(C)C (TTD:D0Q2DE)|S=[Mo-2](=S)(=S)=S.C[N+](C)(CCO)C.C[N+](C)(CCO)C (TTD:D0T8MA)	OCC[N+](C)(C)C	104.171	-0.3151	5	DrugBank:DB00122|IUPHAR:4551|KEGG:D07690|TTD:D08DAE|TTD:D0Q2DE|TTD:D0T8MA	Choline (DrugBank:DB00122)|choline (IUPHAR:4551)|Choline (DCF) (KEGG:D07690)|ATN-224 (TTD:D0T8MA)	Approved; Nutraceutical (DrugBank:DB00122)	62-49-7 (DrugBank:DB00122)|62-49-7 (KEGG:D07690)		For nutritional supplementation, also for treating dietary shortage or imbalance (DrugBank:DB00122)|Metabolite (IUPHAR:4551)|Choleretic (KEGG:D07690)|Solid tumours (TTD:D0T8MA)
D-00253	CCSC(N)=N (DrugBank:DB02234)|S(CC)C(=N)N (TTD:D0I7VD)|Br.S(CC)C(=N)N (TTD:D0V4NQ)	CCSC(=N)N	104.174	1.433	3	DrugBank:DB02234|TTD:D0I7VD|TTD:D0V4NQ	S-Ethylisothiourea (DrugBank:DB02234)	Experimental (DrugBank:DB02234)	2986-20-1 (DrugBank:DB02234)
D-00261	c1(ccccc1)C=O (KEGG:D02314)	O=Cc1ccccc1	106.122	1.4991	7	KEGG:D02314	Benzaldehyde (NF) (KEGG:D02314)		100-52-7 (KEGG:D02314)		Pharmaceutic aid (flavor) (KEGG:D02314)
D-00267	O=C1C=CC(=O)C=C1 (IUPHAR:6307)|O=C1C=CC(=O)C=C1 (TTD:D0M2EM)	O=C1C=CC(=O)C=C1	108.095	0.2506	6	IUPHAR:6307|TTD:D0M2EM	benzoquinone (IUPHAR:6307)				Synthetic organic (IUPHAR:6307)
D-00269	CC1=CC=C(O)C=C1 (DrugBank:DB01688)	Cc1ccc(cc1)O	108.138	1.7006	7	DrugBank:DB01688	P-Cresol (DrugBank:DB01688)	Experimental (DrugBank:DB01688)	106-44-5 (DrugBank:DB01688)
D-00270	CC1=CC=CC(O)=C1 (DrugBank:DB01776)|c1c(cccc1O)C (KEGG:D04951)	Cc1cccc(c1)O	108.138	1.7006	7	DrugBank:DB01776|KEGG:D04951	M-Cresol (DrugBank:DB01776)|Metacresol (USP) (KEGG:D04951)	Experimental (DrugBank:DB01776)	108-39-4 (DrugBank:DB01776)|108-39-4 (KEGG:D04951)		Antifungal, Antiseptic (topical) (KEGG:D04951)
D-00272	Cc1ccnc(c1)N (IUPHAR:5111)|n1c(N)cc(cc1)C (TTD:D0CO8H)|n1c(N)cc(cc1)C (TTD:D0O3XZ)	Cc1ccnc(c1)N	108.141	1.5534	6	IUPHAR:5111|TTD:D0CO8H|TTD:D0O3XZ	2-amino-4-methylpyridine (IUPHAR:5111)				Synthetic organic (IUPHAR:5111)
D-00276	NC1=CC=C(O)C=C1 (DrugBank:DB14144)|Oc1ccc(N)cc1 (TTD:D07MTM)	Nc1ccc(cc1)O	109.126	1.5556	6	DrugBank:DB14144|TTD:D07MTM	p-Aminophenol (DrugBank:DB14144)	Experimental (DrugBank:DB14144)	123-30-8 (DrugBank:DB14144)
D-00281	OC1=CC=C(O)C=C1 (DrugBank:DB09526)|c1(ccc(cc1)O)O (KEGG:D00073)|Oc1ccc(O)cc1 (TTD:D03UOT)|Oc1ccc(O)cc1 (TTD:D08LQA)	Oc1ccc(cc1)O	110.111	1.0978	6	DrugBank:DB09526|KEGG:D00073|TTD:D03UOT|TTD:D08LQA	Hydroquinone (DrugBank:DB09526)|Hydroquinone (USP) (KEGG:D00073)	Approved; Investigational (DrugBank:DB09526)	123-31-9 (DrugBank:DB09526)|123-31-9 (KEGG:D00073)	D11AX11 (DrugBank:DB09526)|D11AX11 (KEGG:D00073)	Hydroquinone is used as an OTC topical lightening agent for disorders of hyperpigmentation including melasma, post-inflammatory hyperpigmention, sunspots and freckles. (DrugBank:DB09526)|Depigmentor, Tyrosinase inhibitor (KEGG:D00073)|Melasma (TTD:D03UOT)
D-00282	OC1=CC(O)=CC=C1 (DrugBank:DB11085)|c1c(cccc1O)O (KEGG:D00133)|Oc1cc(O)ccc1 (TTD:D02DBP)	Oc1cccc(c1)O	110.111	1.0978	6	DrugBank:DB11085|KEGG:D00133|TTD:D02DBP	Resorcinol (DrugBank:DB11085)|Resorcinol (USP) (KEGG:D00133)	Approved (DrugBank:DB11085)	108-46-3 (DrugBank:DB11085)|108-46-3 (KEGG:D00133)	D10AX02; S01AX06 (DrugBank:DB11085)|D10AX02; S01AX06 (KEGG:D00133)	Contemporary therapeutic uses for resorcinol primarily revolve around the use of the phenol derivative as an active ingredient in topical antiseptics [L2745, L2744, L2727, F61] or as topical antibacterial skin treatment products for conditions like acne, seborrheic dermatitis, eczema, and others [L2746, L2745, L2744, L2727, F61]. (DrugBank:DB11085)|Anti-acne, Disinfectant (topical), Keratolytic (…
D-00283	OC1=CC=CC=C1O (DrugBank:DB02232)	Oc1ccccc1O	110.111	1.0978	6	DrugBank:DB02232	1,2-Dihydroxybenzene (DrugBank:DB02232)	Experimental (DrugBank:DB02232)	120-80-9 (DrugBank:DB02232)
D-00286	N1=C(N)C=C(CC1)C (TTD:D0DI7W)	CC1=CC(=NCC1)N	110.157	0.8295	6	TTD:D0DI7W
D-00287	N1=C(N)CC(=CC1)C (TTD:D06PFL)	CC1=CCN=C(C1)N	110.157	0.8295	6	TTD:D06PFL
D-00296	NCCC1=CNC=N1 (DrugBank:DB05381)|c1c(nc[nH]1)CCN.Cl.Cl (KEGG:D04444)|c1c(nc[nH]1)CCN.P(=O)(O)(O)O.P(=O)(O)(O)O (KEGG:D04445)|c1c(nc[nH]1)CCN (KEGG:D08040)	NCCc1c[nH]cn1	111.145	0.6112	5	DrugBank:DB05381|KEGG:D04444|KEGG:D04445|KEGG:D08040	Histamine (DrugBank:DB05381)|Histamine dihydrochloride (USAN) (KEGG:D04444)|Histamine phosphate (USP) (KEGG:D04445)|Histamine (DCF) (KEGG:D08040)	Approved; Investigational (DrugBank:DB05381)	51-45-6 (DrugBank:DB05381)|56-92-8 (KEGG:D04444)|51-74-1 (KEGG:D04445)|51-45-6 (KEGG:D08040)	L03AX14; V04CG03 (DrugBank:DB05381)|L03AX14 (KEGG:D04444)|V04CG03 (KEGG:D04445)	Histamine phosphate is indicated as a diagnostic aid for evaluation of gastric acid secretory function. (DrugBank:DB05381)|Diagnostic aid (control) (KEGG:D04444)|Stimulant (gastric secretory) (KEGG:D04445)|Diagnostic (gastric function) (KEGG:D08040)
D-00299	NCCc1cnc[nH]1 (IUPHAR:1204)|NCCc1cnc[nH]1 (IUPHAR:1247)|[nH]1c(CCN)cnc1 (TTD:D04USC)|P(=O)(O)(O)O.P(=O)(O)(O)O.[nH]1c(CCN)cnc1 (TTD:D0EN0G)	NCCc1cnc[nH]1	111.145	0.6112	5	IUPHAR:1204|IUPHAR:1247|TTD:D04USC|TTD:D0EN0G	histamine (IUPHAR:1204)|[<sup>3</sup>H]histamine (IUPHAR:1247)|Ergotidine (TTD:D04USC)|Histamine Phosphate (TTD:D0EN0G)	Labelled; Radioactive (IUPHAR:1247)			Metabolite (IUPHAR:1204)|Metabolite (IUPHAR:1247)|Cancer; Respiratory allergies (TTD:D04USC)|Diagnostic imaging (TTD:D0EN0G)
D-00310	N1=C(N)C(C(C1)C)C (TTD:D0G4ZL)	CC1C(C)CN=C1N	112.173	0.7653	6	TTD:D0G4ZL
D-00311	N1=C(N)CC(CC1)C (TTD:D0D7PK)	CC1CCN=C(C1)N	112.173	0.9094	6	TTD:D0D7PK
D-00312	N1=C(N)CC(C1)CC (TTD:D02EOF)	CCC1CN=C(C1)N	112.173	0.9094	6	TTD:D02EOF
D-00313	N1=C(N)CC(C1C)C (TTD:D03JXX)	NC1=NC(C(C1)C)C	112.173	0.9078	6	TTD:D03JXX
D-00314	N1=C(N)CCCCC1 (TTD:D08ALG)	NC1=NCCCCC1	112.173	1.0535	6	TTD:D08ALG
D-00323	NCC1CCCCC1 (TTD:D06FHW)	NCC1CCCCC1	113.201	2.2257	7	TTD:D06FHW
D-00329	NCc1cc(=O)[nH]o1 (IUPHAR:4090)|NCc1cc(=O)[nH]o1 (IUPHAR:4259)|o1[nH]c(=O)cc1CN (TTD:D0Z8IJ)	NCc1cc(=O)[nH]o1	114.103	0.1269	4	IUPHAR:4090|IUPHAR:4259|TTD:D0Z8IJ	[<sup>3</sup>H]muscimol (IUPHAR:4090)|muscimol (IUPHAR:4259)	Labelled; Radioactive (IUPHAR:4090)			Natural product (IUPHAR:4090)|Natural product (IUPHAR:4259)
D-00330	NCC1=CC(O)=NO1 (DrugBank:DB12458)	NCc1cc(no1)O	114.103	0.5392	4	DrugBank:DB12458	Muscimol (DrugBank:DB12458)	Investigational (DrugBank:DB12458)	2763-96-4 (DrugBank:DB12458)
D-00331	N[C@H](C(=O)O)CC#N (IUPHAR:8859)	N[C@H](C(=O)O)CC#N	114.103	0.01228	4	IUPHAR:8859	&beta;-Cyano-L-alanine (IUPHAR:8859)				Synthetic organic (IUPHAR:8859)
D-00341	O1CCCN=C(N)C1 (TTD:D0I3ZP)	NC1=NCCCOC1	114.146	-0.1002	5	TTD:D0I3ZP
D-00359	CCCCCC(C)N (DrugBank:DB13238)|CCCCCC(C)N (KEGG:D07371)	CCCCCC(N)C	115.217	2.6142	7	DrugBank:DB13238|KEGG:D07371	Tuaminoheptane (DrugBank:DB13238)|Tuaminoheptane (INN) (KEGG:D07371)	Experimental (DrugBank:DB13238)	123-82-0 (DrugBank:DB13238)|123-82-0 (KEGG:D07371)	R01AA11; R01AB08 (DrugBank:DB13238)|R01AA11; R01AB08 (KEGG:D07371)	Vasoconstrictor (KEGG:D07371)
D-00361	OC(=O)\C=C\C(O)=O (DrugBank:DB01677)|C(=O)(/C=C/C(=O)O)O (KEGG:D02308)|OC(=O)/C=C/C(=O)O (TTD:D03GOO)	OC(=O)/C=C/C(=O)O	116.072	-0.2882	4	DrugBank:DB01677|KEGG:D02308|TTD:D03GOO	Fumaric Acid (DrugBank:DB01677)|Fumaric acid (NF) (KEGG:D02308)|Fumaric acid (TTD:D03GOO)	Experimental; Investigational (DrugBank:DB01677)	110-17-8 (DrugBank:DB01677)|110-17-8 (KEGG:D02308)	D05AX01 (DrugBank:DB01677)|D05AX01 (KEGG:D02308)	Antipsoriatic, Pharmaceutic aid (acidifier) (KEGG:D02308)|Multiple sclerosis; Pustular palmoplantar psoriasis (TTD:D03GOO)
D-00371	O=C1[C@H](N)CCN1O (IUPHAR:4066)|ON1CC[C@@H](N)C1=O (TTD:D08TAN)	O=C1[C@H](N)CCN1O	116.119	-0.4266	4	IUPHAR:4066|TTD:D08TAN	(+)-HA966 (IUPHAR:4066)|(+)-HA966 (TTD:D08TAN)				Synthetic organic (IUPHAR:4066)
D-00374	S1CCCN=C1N (TTD:D0O9II)	NC1=NCCCS1	116.185	0.5739	4	TTD:D0O9II
D-00375	NCCCCCCN (DrugBank:DB03260)|NCCCCCCN (TTD:D09JPC)	NCCCCCCN	116.205	1.8648	6	DrugBank:DB03260|TTD:D09JPC	1,6-Diaminohexane (DrugBank:DB03260)	Experimental (DrugBank:DB03260)
D-00394	N1C=CC2=C1C=CC=C2 (DrugBank:DB04532)	c1ccc2c(c1)[nH]cc2	117.148	2.1679	8	DrugBank:DB04532	Indole (DrugBank:DB04532)	Experimental (DrugBank:DB04532)	120-72-9 (DrugBank:DB04532)
D-00422	CC(C)SC(N)=N (DrugBank:DB04018)|Br.S(C(C)C)C(=N)N (TTD:D0J1LO)	CC(SC(=N)N)C	118.201	1.8215	4	DrugBank:DB04018|TTD:D0J1LO	S-Isopropyl-Isothiourea (DrugBank:DB04018)	Experimental (DrugBank:DB04018)
D-00424	ON(CC(O)=O)C=O (DrugBank:DB02109)|ON(CC(=O)O)C=O (TTD:D05EHM)|ON(CC(=O)O)C=O (TTD:D0KN9E)	O=CN(CC(=O)O)O	119.076	-0.4455	3	DrugBank:DB02109|TTD:D05EHM|TTD:D0KN9E	Hadacidin (DrugBank:DB02109)	Experimental (DrugBank:DB02109)
D-00431	Oc1ccc(cc1)C#N.Oc1ccc(cc1)C#N (TTD:D00IUB)	N#Cc1ccc(cc1)O	119.121	1.26388	7	TTD:D00IUB
D-00439	NC(=N)c1ccccc1 (IUPHAR:7566)|NC(=N)c1ccccc1 (TTD:D07SFI)	NC(=N)c1ccccc1	120.152	1.7707	7	IUPHAR:7566|TTD:D07SFI	benzamidine (IUPHAR:7566)				Synthetic organic (IUPHAR:7566)
D-00444	[O-]C(=O)c1ccccc1 (IUPHAR:4565)|c1(ccccc1)C(=O)[O-].[Na+] (KEGG:D02277)|c1ccccc1C(=O)[O-].[K+] (KEGG:D05576)|[O-]C(=O)c1ccccc1 (TTD:D0X9RY)	[O-]C(=O)c1ccccc1	121.113	0.0501	7	IUPHAR:4565|KEGG:D02277|KEGG:D05576|TTD:D0X9RY	benzoate (IUPHAR:4565)|Sodium benzoate (JP17/NF) (KEGG:D02277)|Potassium benzoate (NF) (KEGG:D05576)		532-32-1 (KEGG:D02277)|582-25-2 (KEGG:D05576)	A16AX11 (KEGG:D02277)	Natural product (IUPHAR:4565)|Antihyperammonemic, Pharmaceutic aid (antifungal) (KEGG:D02277)|Pharmaceutic aid (preservative) (KEGG:D05576)|Fungal infections (TTD:D0X9RY)
D-00453	NCCC1=CC=CC=C1 (DrugBank:DB04325)|NCCc1ccccc1 (IUPHAR:2144)|NCCc1ccccc1 (TTD:D0Q6PI)	NCCc1ccccc1	121.18	1.8881	8	DrugBank:DB04325|IUPHAR:2144|TTD:D0Q6PI	Phenethylamine (DrugBank:DB04325)|&beta;-phenylethylamine (IUPHAR:2144)	Experimental (DrugBank:DB04325)	64-04-0 (DrugBank:DB04325)		Metabolite (IUPHAR:2144)
D-00456	OB(O)C1=CC=CC=C1 (DrugBank:DB01795)|OB(O)c1ccccc1 (TTD:D0EJ9B)	OB(c1ccccc1)O	121.93	-0.6336	6	DrugBank:DB01795|TTD:D0EJ9B	Phenyl Boronic Acid (DrugBank:DB01795)|Phenyl Boronic acid (TTD:D0EJ9B)	Experimental (DrugBank:DB01795)
D-00464	OC(=O)C1=CC=CC=C1 (DrugBank:DB03793)|c1(ccccc1)C(=O)O (KEGG:D00038)	OC(=O)c1ccccc1	122.121	1.3848	7	DrugBank:DB03793|KEGG:D00038	Benzoic Acid (DrugBank:DB03793)|Benzoic acid (JP17/USP) (KEGG:D00038)	Approved; Investigational (DrugBank:DB03793)	65-85-0 (DrugBank:DB03793)|65-85-0 (KEGG:D00038)	A16AX11; V04CG30 (DrugBank:DB03793)	Antifungal, Antiseptic (KEGG:D00038)
D-00465	Oc1c(=O)ccccc1 (TTD:D0D7GL)	Oc1cccccc1=O	122.121	0.7524	7	TTD:D0D7GL
D-00466	NC(=O)C1=CC=CN=C1 (DrugBank:DB02701)|c1(cccnc1)C(=O)N (KEGG:D00036)	NC(=O)c1cccnc1	122.125	0.8808	6	DrugBank:DB02701|KEGG:D00036	Nicotinamide (DrugBank:DB02701)|Niacinamide (USP) (KEGG:D00036)	Approved; Investigational (DrugBank:DB02701)	98-92-0 (DrugBank:DB02701)|98-92-0 (KEGG:D00036)	A11HA01 (DrugBank:DB02701)|A11HA01 (KEGG:D00036)	Supplement (nicotinic acid) (KEGG:D00036)
D-00469	OCCC1=CC=CC=C1 (DrugBank:DB02192)|c1(ccccc1)CCO (KEGG:D00192)	OCCc1ccccc1	122.164	1.2214	8	DrugBank:DB02192|KEGG:D00192	Phenylethyl alcohol (DrugBank:DB02192)|Phenylethyl alcohol (USP) (KEGG:D00192)	Experimental (DrugBank:DB02192)	60-12-8 (DrugBank:DB02192)|60-12-8 (KEGG:D00192)		Antibacterial (KEGG:D00192)
D-00470	CC1=CC=C(O)C=C1C (DrugBank:DB04052)	Oc1ccc(c(c1)C)C	122.164	2.009	8	DrugBank:DB04052	3,4-Dimethylphenol (DrugBank:DB04052)	Experimental (DrugBank:DB04052)
D-00471	n1c(cc(cc1N)C)C (TTD:D0W9UV)	Cc1cc(C)nc(c1)N	122.168	1.8618	7	TTD:D0W9UV
D-00472	NCCc1ccccn1 (IUPHAR:1197)|n1c(CCN)cccc1 (TTD:D0BT1A)	NCCc1ccccn1	122.168	1.2831	7	IUPHAR:1197|TTD:D0BT1A	2-pyridylethylamine (IUPHAR:1197)				Synthetic organic (IUPHAR:1197)
D-00474	OC(=O)C1=CN=CC=C1 (DrugBank:DB00627)|OC(=O)c1cccnc1 (IUPHAR:1588)|OC(=O)c1cccnc1 (IUPHAR:1594)|c1(cccnc1)C(=O)O (KEGG:D00049)|OC(=O)c1cccnc1 (TTD:D06NVJ)	OC(=O)c1cccnc1	123.109	0.7798	6	DrugBank:DB00627|IUPHAR:1588|IUPHAR:1594|KEGG:D00049|TTD:D06NVJ	Niacin (DrugBank:DB00627)|nicotinic acid (IUPHAR:1588)|[<sup>3</sup>H]nicotinic acid (IUPHAR:1594)|Niacin (USP) (KEGG:D00049)|Nicotinamide (TTD:D06NVJ)	Approved; Investigational; Nutraceutical (DrugBank:DB00627)|Labelled; Radioactive (IUPHAR:1594)	59-67-6 (DrugBank:DB00627)|59-67-6 (KEGG:D00049)	C04AC01; C10AD02; C10AD52; C10BA01 (DrugBank:DB00627)|C04AC01; C10AD02 (KEGG:D00049)	For the treatment of type IV and V hyperlipidemia. It is indicated as ajunctive therapy. (DrugBank:DB00627)|Metabolite (IUPHAR:1588)|Metabolite (IUPHAR:1594)|Antihyperlipidemic, Vasodilator, Supplement (nicotinic acid) (KEGG:D00049)|Inflammatory skin condition (TTD:D06NVJ)
D-00476	NC(=O)C1=NC=CN=C1 (DrugBank:DB00339)|c1(cnccn1)C(=O)N (KEGG:D00144)|O=C(N)c1nccnc1 (TTD:D0XF8W)	NC(=O)c1cnccn1	123.113	0.2758	5	DrugBank:DB00339|KEGG:D00144|TTD:D0XF8W	Pyrazinamide (DrugBank:DB00339)|Pyrazinamide (JP17/USP/INN) (KEGG:D00144)|Pyrazinamide (TTD:D0XF8W)	Approved; Investigational (DrugBank:DB00339)	98-96-4 (DrugBank:DB00339)|98-96-4 (KEGG:D00144)	J04AK01; J04AM05; J04AM06 (DrugBank:DB00339)|J04AK01 (KEGG:D00144)	For the initial treatment of active tuberculosis in adults and children when combined with other antituberculous agents. (DrugBank:DB00339)|Antibacterial (tuberculostatic) (KEGG:D00144)|Mycobacterium tuberculosis infection (TTD:D0XF8W)
D-00483	N[C@H]1[C@@H](C1)c1[nH]cnc1 (TTD:D0K6AK)	N[C@@H]1C[C@H]1c1cnc[nH]1	123.156	0.9246	6	TTD:D0K6AK
D-00484	N[C@@H]1[C@H](C1)c1[nH]cnc1 (TTD:D0H3DY)	N[C@H]1C[C@@H]1c1cnc[nH]1	123.156	0.9246	6	TTD:D0H3DY
D-00486	S(=O)(O)CCCN (TTD:D0N4EZ)	NCCCS(=O)O	123.174	1.1229	3	TTD:D0N4EZ
D-00490	COC1=C(O)C=CC=C1 (DrugBank:DB11359)|c1(c(cccc1)OC)O (KEGG:D00117)|O(c1c(O)cccc1)C (TTD:D02JUW)	COc1ccccc1O	124.137	1.4008	7	DrugBank:DB11359|KEGG:D00117|TTD:D02JUW	Guaiacol (DrugBank:DB11359)|Guaiacol (JAN) (KEGG:D00117)	Approved (DrugBank:DB11359)	90-05-1 (DrugBank:DB11359)|90-05-1 (KEGG:D00117)		It is used medicinally as an expectorant, antiseptic, and local anesthetic. Guaiacol is used in traditional dental pulp sedation, and has the property of inducing cell proliferation; guaiacol is a potent scavenger of reactive oxygen radicals and its radical scavenging activity may be associated with its effect on cell proliferation. (DrugBank:DB11359)|Analgesic, Disinfectant (KEGG:D00117)
D-00496	N1=C(N)C=C(CC1)CC (TTD:D0Y8DZ)	CCC1=CC(=NCC1)N	124.184	1.2196	7	TTD:D0Y8DZ
D-00497	N12C(CCC1)CCC2=N (TTD:D0VN7G)	N=C1CCC2N1CCC2	124.184	1.2595	7	TTD:D0VN7G
D-00498	N1=C(N)CC2C1CCC2 (TTD:D04QFO)	NC1=NC2C(C1)CCC2	124.184	1.0519	7	TTD:D04QFO
D-00499	N1=C(N)C2C(CCC2)C1 (TTD:D0LE6N)	NC1=NCC2C1CCC2	124.184	0.9094	7	TTD:D0LE6N
D-00500	SCc1ccccc1 (TTD:D00GYX)	SCc1ccccc1	124.203	2.1164	7	TTD:D00GYX
D-00503	OCC(S)CS (DrugBank:DB06782)|C(CO)(CS)S (KEGG:D00167)|C(C(CS)S)O (TTD:D0X2IE)	OCC(CS)S	124.225	0.2069	3	DrugBank:DB06782|KEGG:D00167|TTD:D0X2IE	Dimercaprol (DrugBank:DB06782)|Dimercaprol (JP17/USP/INN) (KEGG:D00167)	Approved (DrugBank:DB06782)	59-52-9 (DrugBank:DB06782)|59-52-9 (KEGG:D00167)	V03AB09 (DrugBank:DB06782)|V03AB09 (KEGG:D00167)	For the treatment of arsenic, gold and mercury poisoning. Indicated in acute lead poisoning when used concomitantly with edetate calcium disodium (DB00974). (DrugBank:DB06782)|Antidote (KEGG:D00167)|Poison intoxication (TTD:D0X2IE)
D-00505	CCN1C(=O)C=CC1=O (DrugBank:DB02967)|CCN1C(=O)C=CC1=O (IUPHAR:5335)|O=C1N(CC)C(=O)C=C1 (TTD:D02ZQH)	CCN1C(=O)C=CC1=O	125.125	-0.1308	6	DrugBank:DB02967|IUPHAR:5335|TTD:D02ZQH	N-Ethylmaleimide (DrugBank:DB02967)|N-ethylmaleimide (IUPHAR:5335)	Experimental (DrugBank:DB02967)	128-53-0 (DrugBank:DB02967)		Synthetic organic (IUPHAR:5335)
D-00509	CNCCc1cnc[nH]1 (IUPHAR:1239)|CNCCc1cnc[nH]1 (IUPHAR:1240)|N(CCc1[nH]cnc1)C (TTD:D08ECP)|N(CCc1[nH]cnc1)C (TTD:D0B0YD)	CNCCc1cnc[nH]1	125.172	0.5625	6	IUPHAR:1239|IUPHAR:1240|TTD:D08ECP|TTD:D0B0YD	<i>N</i>-&alpha;-methylhistamine (IUPHAR:1239)|<i>N</i>-[<sup>3</sup>H]&alpha;-methylhistamine (IUPHAR:1240)|N-[3H]alpha-methylhistamine (TTD:D08ECP)	Labelled; Radioactive (IUPHAR:1240)			Synthetic organic (IUPHAR:1239)|Synthetic organic (IUPHAR:1240)
D-00510	C[C@@H](Cc1cnc[nH]1)N (IUPHAR:1238)|[nH]1c(C[C@@H](N)C)cnc1 (TTD:D0Q8BS)	C[C@@H](Cc1cnc[nH]1)N	125.172	0.9997	6	IUPHAR:1238|TTD:D0Q8BS	(<i>S</i>)-&alpha;-methylhistamine (IUPHAR:1238)|(S)-alpha-methylhistamine (TTD:D0Q8BS)				Synthetic organic (IUPHAR:1238)
D-00511	C[C@H](Cc1cnc[nH]1)N (IUPHAR:1236)|C[C@H](Cc1cnc[nH]1)N (IUPHAR:1237)|[nH]1c(C[C@H](N)C)cnc1 (TTD:D03SAM)|[nH]1c(C[C@H](N)C)cnc1 (TTD:D04HEZ)	C[C@H](Cc1cnc[nH]1)N	125.172	0.9997	6	IUPHAR:1236|IUPHAR:1237|TTD:D03SAM|TTD:D04HEZ	(<i>R</i>)-&alpha;-methylhistamine (IUPHAR:1236)|[<sup>3</sup>H](<i>R</i>)-&alpha;-methylhistamine (IUPHAR:1237)|[3H](R)-alpha-methylhistamine (TTD:D04HEZ)	Labelled; Radioactive (IUPHAR:1237)			Synthetic organic (IUPHAR:1236)|Synthetic organic (IUPHAR:1237)
D-00512	Cc1c(CCN)nc[nH]1 (IUPHAR:1269)|[nH]1c(c(nc1)CCN)C (TTD:D02SQF)	Cc1c(CCN)nc[nH]1	125.172	0.9196	6	IUPHAR:1269|TTD:D02SQF	4-methylhistamine (IUPHAR:1269)				Synthetic organic (IUPHAR:1269)
D-00513	Cn1cc(nc1)CCN (IUPHAR:1241)|Cn1cc(nc1)CCN (IUPHAR:1242)|n1(cc(nc1)CCN)C (TTD:D0A4XL)|n1(cc(nc1)CCN)C (TTD:D0T6SC)	Cn1cc(nc1)CCN	125.172	0.6216	6	IUPHAR:1241|IUPHAR:1242|TTD:D0A4XL|TTD:D0T6SC	<i>N</i>-[<sup>3</sup>H]methylhistamine (IUPHAR:1241)|<i>N</i>-methylhistamine (IUPHAR:1242)|N-methylhistamine (TTD:D0T6SC)	Labelled; Radioactive (IUPHAR:1241)			Synthetic organic (IUPHAR:1241)|Synthetic organic (IUPHAR:1242)
D-00519	Oc1c(O)cccc1O (TTD:D06TPF)	Oc1c(O)cccc1O	126.11	0.8034	6	TTD:D06TPF
D-00527	c1ccc(=S)n(c1)[O-].[O-]n1c(=S)cccc1.[Zn+2] (KEGG:D01938)|c1ccn(c(=S)c1)[O-].[Na+] (KEGG:D05662)|[Zn+2].S=c1n([O-])cccc1.S=c1n([O-])cccc1 (TTD:D0C8FX)	S=c1ccccn1[O-]	126.156	1.5635	5	KEGG:D01938|KEGG:D05662|TTD:D0C8FX	Pyrithione zinc (USAN/INN) (KEGG:D01938)|Pyrithione sodium (USAN) (KEGG:D05662)|Pyrithione Zinc (TTD:D0C8FX)		13463-41-7 (KEGG:D01938)|15922-78-8 (KEGG:D05662)	D11AX12 (KEGG:D01938)	Antibacterial, Antifungal, Antiseborrheic (KEGG:D01938)|Antibacterial (topical) (KEGG:D05662)|Seborrhoeic dermatitis (TTD:D0C8FX)
D-00528	[S-]c1cccc[n+]1[O-].[S-]c1cccc[n+]1[O-].[Zn+2] (IUPHAR:2597)|[Zn+2].[S-]c1[n+]([O-])cccc1.[S-]c1[n+]([O-])cccc1 (TTD:D07FTI)	[S-]c1ccccn1=O	126.156	1.0209	5	IUPHAR:2597|TTD:D07FTI	zinc pyrithione (IUPHAR:2597)				Synthetic organic (IUPHAR:2597)
D-00529	N1=C(N)CC(C(C)C)C1 (TTD:D00KOE)	CC(C1CN=C(C1)N)C	126.199	1.1554	7	TTD:D00KOE
D-00531	N1=C(N)CC(C1C)CC (TTD:D0X6QY)	CCC1CC(=NC1C)N	126.199	1.2979	7	TTD:D0X6QY
D-00532	N1=C(N)C(C(C1)CC)C (TTD:D0J2RI)	CCC1CN=C(C1C)N	126.199	1.1554	7	TTD:D0J2RI
D-00533	N1=C(N)C(CC1CC)C (TTD:D0D2WC)	CCC1N=C(C(C1)C)N	126.199	1.2979	7	TTD:D0D2WC
D-00534	N1=C(N)CC(C1CC)C (TTD:D0XJ1C)	CCC1N=C(CC1C)N	126.199	1.2979	7	TTD:D0XJ1C
D-00535	N1=C(N)CCCCCC1 (TTD:D0K1CM)	NC1=NCCCCCC1	126.199	1.4436	7	TTD:D0K1CM
D-00543	[O-][N+]1=C(S)C=CC=C1 (DrugBank:DB06815)	Sc1ccccn1=O	127.164	1.4038	5	DrugBank:DB06815	Pyrithione (DrugBank:DB06815)	Approved (DrugBank:DB06815)	1121-31-9 (DrugBank:DB06815)	D11AX12 (DrugBank:DB06815)	Indicated for the treatment of dandruff and seborrheic dermatitis [A27133]. (DrugBank:DB06815)
D-00545	O=CNC1CCCCC1 (DrugBank:DB03559)	O=CNC1CCCCC1	127.184	2.0919	7	DrugBank:DB03559	Cyclohexylformamide (DrugBank:DB03559)	Experimental (DrugBank:DB03559)
D-00546	N1(CCCCC1)C(=N)N (TTD:D0M1LO)	NC(=N)N1CCCCC1	127.188	1.1037	6	TTD:D0M1LO
D-00562	OC(=O)C(Cl)Cl (DrugBank:DB08809)	ClC(C(=O)O)Cl	128.942	0.8747	2	DrugBank:DB08809	Dichloroacetic acid (DrugBank:DB08809)	Approved; Investigational (DrugBank:DB08809)	79-43-6 (DrugBank:DB08809)
D-00572	OC(=O)C1=CSC=N1 (DrugBank:DB03422)	OC(=O)c1cscn1	129.137	0.8413	4	DrugBank:DB03422	1,3-Thiazole-4-Carboxylic Acid (DrugBank:DB03422)	Experimental (DrugBank:DB03422)
D-00576	OC(=O)C1CCCNC1 (IUPHAR:4564)|OC(=O)C1CCCNC1 (TTD:D0RF2M)	OC(=O)C1CCCNC1	129.157	0.3994	6	IUPHAR:4564|TTD:D0RF2M	nipecotic acid (IUPHAR:4564)				Synthetic organic (IUPHAR:4564)
D-00580	OC(=O)[C@H]1CCCNC1 (TTD:D03IWW)|OC(=O)[C@H]1CCCNC1 (TTD:D0D2EF)	OC(=O)[C@H]1CCCNC1	129.157	0.3994	6	TTD:D03IWW|TTD:D0D2EF
D-00592	FC1=CNC(=O)NC1=O (DrugBank:DB00544)|Fc1c[nH]c(=O)[nH]c1=O (IUPHAR:4789)|c1(=O)c(c[nH]c(=O)[nH]1)F (KEGG:D00584)|c1(=O)c(c[nH]c(=O)[nH]1)F.[NaH] (KEGG:D07974)|Fc1c(=O)[nH]c(=O)[nH]c1 (TTD:D05LEO)|Fc1c(=O)[nH]c(=O)[nH]c1 (TTD:D08EPN)|Fc1c(=O)[nH]c(=O)[nH]c1 (TTD:D0A7VK)|Fc1c(=O)[nH]c(=O)[nH]c1 (TTD:D0K7CG)	Fc1c[nH]c(=O)[nH]c1=O	130.077	-0.7977	4	DrugBank:DB00544|IUPHAR:4789|KEGG:D00584|KEGG:D07974|TTD:D05LEO|TTD:D08EPN|TTD:D0A7VK|TTD:D0K7CG	Fluorouracil (DrugBank:DB00544)|5-fluorouracil (IUPHAR:4789)|Fluorouracil (JP17/USP/INN) (KEGG:D00584)|Fluorouracil sodium salt (KEGG:D07974)|Fluorouracil (TTD:D05LEO)|5-Fluorouracil (TTD:D0K7CG)	Approved (DrugBank:DB00544)|Approved (IUPHAR:4789)	51-21-8 (DrugBank:DB00544)|51-21-8 (KEGG:D00584)	L01BC02; L01BC52 (DrugBank:DB00544)|L01BC02 (KEGG:D00584)|L01BC02 (KEGG:D07974)	For the topical treatment of multiple actinic or solar keratoses. In the 5% strength it is also useful in the treatment of superficial basal cell carcinomas when conventional methods are impractical, such as with multiple lesions or difficult treatment sites. Fluorouracil injection is indicated in the palliative management of some types of cancer, including colon, esophageal, gastric, rectum, bre…
D-00594	Fc1cc(O)cc(F)c1 (TTD:D0Q2XB)	Oc1cc(F)cc(c1)F	130.092	1.6704	6	TTD:D0Q2XB
D-00595	COC(=O)\C=C\C(O)=O (DrugBank:DB14219)|COC(=O)/C=C/C(=O)O (IUPHAR:5786)|O(C(=O)/C=C/C(=O)O)C (KEGG:D11492)|O(C(=O)/C=C/C(=O)O)C (TTD:D0S3XI)	COC(=O)/C=C/C(=O)O	130.099	-0.1998	5	DrugBank:DB14219|IUPHAR:5786|KEGG:D11492|TTD:D0S3XI	Monomethyl fumarate (DrugBank:DB14219)|monomethyl fumarate (IUPHAR:5786)|Monomethyl fumarate (USAN) (KEGG:D11492)	Experimental; Investigational (DrugBank:DB14219)	2756-87-8 (DrugBank:DB14219)|2756-87-8 (KEGG:D11492)		Synthetic organic (IUPHAR:5786)|Immunomodulator (KEGG:D11492)
D-00603	NCCCCN=C(N)N (IUPHAR:4127)|N(=C(N)N)CCCCN (TTD:D0K7CV)	NCCCCN=C(N)N	130.191	1.0996	5	IUPHAR:4127|TTD:D0K7CV	agmatine (IUPHAR:4127)				Metabolite (IUPHAR:4127)
D-00606	S1C(CCN=C1N)C (TTD:D01TDC)	CC1CCN=C(S1)N	130.211	0.9624	5	TTD:D01TDC
D-00607	S1CCCN=C(N)C1 (TTD:D02TYS)	NC1=NCCCSC1	130.211	0.6164	5	TTD:D02TYS
D-00608	S1CCC(=NCC1)N (TTD:D0N3HU)	NC1=NCCSCC1	130.211	0.6164	5	TTD:D0N3HU
D-00636	OC(=O)[C@@H]1O[C@@H]1C(=O)O (IUPHAR:9631)	OC(=O)[C@@H]1O[C@@H]1C(=O)O	132.072	-1.077	4	IUPHAR:9631	<i>cis</i>-epoxysuccinic acid (IUPHAR:9631)				Synthetic organic (IUPHAR:9631)
D-00644	OC(=O)CCCC(O)=O (DrugBank:DB03553)|OC(=O)CCCC(=O)O (TTD:D04XDS)	OC(=O)CCCC(=O)O	132.115	0.3259	5	DrugBank:DB03553|TTD:D04XDS	Glutaric Acid (DrugBank:DB03553)	Experimental (DrugBank:DB03553)	110-94-1 (DrugBank:DB03553)
D-00653	O=C\C=C\C1=CC=CC=C1 (DrugBank:DB14184)|O=C/C=C/c1ccccc1 (IUPHAR:2423)|O=C/C=C/c1ccccc1 (TTD:D0PJ3M)	O=C/C=C/c1ccccc1	132.159	1.8987	9	DrugBank:DB14184|IUPHAR:2423|TTD:D0PJ3M	Cinnamaldehyde (DrugBank:DB14184)|cinnamaldehyde (IUPHAR:2423)|cinnamaldehyde (TTD:D0PJ3M)	Approved; Experimental (DrugBank:DB14184)	14371-10-9 (DrugBank:DB14184)		Cinnamaldehyde is approved by the FDA for use within allergenic epicutaneous patch tests which are indicated for use as an aid in the diagnosis of allergic contact dermatitis (ACD) in persons 6 years of age and older. (DrugBank:DB14184)|Synthetic organic (IUPHAR:2423)
D-00659	n1cc(ccc1)C#CCN (TTD:D0O1HH)	NCC#Cc1cccnc1	132.163	1.0921	8	TTD:D0O1HH
D-00661	N[C@H](CC(O)=O)C(O)=O (DrugBank:DB02655)|OC(=O)C[C@H](C(=O)O)N (IUPHAR:4698)|OC(=O)C[C@H](C(=O)O)N (IUPHAR:6511)|OC(=O)[C@H](N)CC(=O)O (TTD:D08CAB)|OC(=O)[C@H](N)CC(=O)O (TTD:D09MXG)	OC(=O)C[C@H](C(=O)O)N	133.103	-0.4267	4	DrugBank:DB02655|IUPHAR:4698|IUPHAR:6511|TTD:D08CAB|TTD:D09MXG	D-Aspartic Acid (DrugBank:DB02655)|[<sup>3</sup>H]D-aspartic acid (IUPHAR:4698)|D-aspartic acid (IUPHAR:6511)|D-aspartic acid (TTD:D08CAB)|[3H]D-aspartic acid (TTD:D09MXG)	Experimental (DrugBank:DB02655)|Labelled; Radioactive (IUPHAR:4698)	1783-96-6 (DrugBank:DB02655)		Metabolite (IUPHAR:4698)|Synthetic organic (IUPHAR:6511)
D-00667	O[C@@H]1[C@H](NC[C@H]1O)CO (TTD:D0GS0O)	OC[C@H]1NC[C@H]([C@@H]1O)O	133.146	-1.9989	5	TTD:D0GS0O
D-00669	Oc1ccc2c(c1)cc[nH]2 (IUPHAR:2295)|Oc1cc2c([nH]cc2)cc1 (TTD:D00EJS)	Oc1ccc2c(c1)cc[nH]2	133.147	1.8735	8	IUPHAR:2295|TTD:D00EJS	5-hydroxyindole (IUPHAR:2295)				Synthetic organic (IUPHAR:2295)
D-00678	N1CCc2c(C1)cccc2 (TTD:D03EPY)	N1CCc2c(C1)cccc2	133.19	1.6611	9	TTD:D03EPY
D-00679	NC1CC1C1=CC=CC=C1 (DrugBank:DB00752)|NC1CC1c1ccccc1 (IUPHAR:5281)|NC1C(C1)c1ccccc1 (TTD:D0H0HJ)	NC1CC1c1ccccc1	133.19	2.2015	9	DrugBank:DB00752|IUPHAR:5281|TTD:D0H0HJ	Tranylcypromine (DrugBank:DB00752)|tranylcypromine (IUPHAR:5281)|Tranylcypromine (TTD:D0H0HJ)	Approved; Investigational (DrugBank:DB00752)|Approved (IUPHAR:5281)	155-09-9 (DrugBank:DB00752)	N06AF04 (DrugBank:DB00752)	For the treatment of major depressive episode without melancholia. (DrugBank:DB00752)|Synthetic organic (IUPHAR:5281)|Major depressive episode without melancholia (TTD:D0H0HJ)
D-00680	C1(c2ccccc2)[C@@H](C1)N.S(=O)(=O)(O)O.C1(c2ccccc2)[C@H](N)C1 (KEGG:D00826)|C1(c2ccccc2)[C@@H](C1)N (KEGG:D08625)	N[C@@H]1CC1c1ccccc1	133.19	2.2015	9	KEGG:D00826|KEGG:D08625	Tranylcypromine sulfate (USP XXI) (KEGG:D00826)|Tranylcypromine (INN) (KEGG:D08625)		13492-01-8 (KEGG:D00826)|155-09-9 (KEGG:D08625)	N06AF04 (KEGG:D00826)|N06AF04 (KEGG:D08625)	Antidepressant, Monoamine oxidase (MAO) inhibitor (KEGG:D00826)|Antidepressant, Monoamine oxidase (MAO) inhibitor (KEGG:D08625)
D-00683	NC1=NN=C(S)S1 (DrugBank:DB12348)	Nc1nnc(s1)S	133.195	0.9902	2	DrugBank:DB12348	5-amino-1,3,4-thiadiazole-2-thiol (DrugBank:DB12348)	Investigational (DrugBank:DB12348)	2349-67-9 (DrugBank:DB12348)
D-00687	O1Cc2c(cccc2)B1O (TTD:D0G0ZI)	OB1OCc2c1cccc2	133.94	-0.0957	7	TTD:D0G0ZI
D-00695	O=c1[nH][nH]c2c1cccc2 (TTD:D0H6JC)	O=c1[nH][nH]c2c1cccc2	134.135	0.8562	7	TTD:D0H6JC
D-00696	CC1=C2NC=NC2=NC=N1 (DrugBank:DB02113)	Cc1ncnc2c1[nH]cn2	134.139	0.6613	6	DrugBank:DB02113	6-Methylpurine (DrugBank:DB02113)	Experimental (DrugBank:DB02113)	2004-03-7 (DrugBank:DB02113)
D-00698	n1(nnc2c1cccc2)N (TTD:D07ANY)	Nn1nnc2c1cccc2	134.139	0.7263	6	TTD:D07ANY
D-00705	SCCCCC(=O)O (TTD:D0Z0UQ)	SCCCCC(=O)O	134.197	1.1711	5	TTD:D0Z0UQ
D-00714	NC1=C2NC=NC2=NC=N1 (DrugBank:DB00173)|Nc1ncnc2c1[nH]cn2 (IUPHAR:4788)|[nH]1c2c(nc1)ncnc2N (TTD:D08IBS)	Nc1ncnc2c1[nH]cn2	135.127	0.5163	5	DrugBank:DB00173|IUPHAR:4788|TTD:D08IBS	Adenine (DrugBank:DB00173)|adenine (IUPHAR:4788)|Adenine (TTD:D08IBS)	Approved; Nutraceutical (DrugBank:DB00173)	73-24-5 (DrugBank:DB00173)		For nutritional supplementation, also for treating dietary shortage or imbalance (DrugBank:DB00173)|Metabolite (IUPHAR:4788)|Dietary shortage (TTD:D08IBS)
D-00717	O=CNCC1=CC=CC=C1 (DrugBank:DB02481)	O=CNCc1ccccc1	135.163	1.9594	8	DrugBank:DB02481	N-Benzylformamide (DrugBank:DB02481)	Experimental (DrugBank:DB02481)	6343-54-0 (DrugBank:DB02481)
D-00718	Oc1cc2CCNc2cc1 (TTD:D05XNR)	Oc1ccc2c(c1)CCN2	135.163	1.4982	8	TTD:D05XNR
D-00719	Cl.COC(=O)[C@H](CS)N (KEGG:D01574)|COC(=O)[C@H](CS)N (KEGG:D08164)	COC(=O)[C@H](CS)N	135.185	0.1168	4	KEGG:D01574|KEGG:D08164	Methyl L-cysteine hydrochloride (JAN) (KEGG:D01574)|Mecysteine (INN) (KEGG:D08164)		18598-63-5 (KEGG:D01574)|2485-62-3 (KEGG:D08164)		Mucolytic (KEGG:D01574)|Mucolytic (KEGG:D08164)
D-00725	CC(N)CC1=CC=CC=C1 (DrugBank:DB00182)|CC(Cc1ccccc1)N (IUPHAR:4804)|c1(ccccc1)CC(C)N.S(=O)(=O)(O)O.c1(ccccc1)CC(C)N (KEGG:D02074)|c1(ccccc1)CC(N)C (KEGG:D07445)|NC(Cc1ccccc1)C (TTD:D05BMG)	CC(Cc1ccccc1)N	135.206	2.2766	9	DrugBank:DB00182|IUPHAR:4804|KEGG:D02074|KEGG:D07445|TTD:D05BMG	Amphetamine (DrugBank:DB00182)|amphetamine (IUPHAR:4804)|Amphetamine sulfate (USP) (KEGG:D02074)|Amfetamine (INN) (KEGG:D07445)|Amphetamine (TTD:D05BMG)	Approved; Illicit; Investigational (DrugBank:DB00182)|Approved (IUPHAR:4804)	300-62-9 (DrugBank:DB00182)|60-13-9 (KEGG:D02074)|300-62-9 (KEGG:D07445)	N06BA01 (DrugBank:DB00182)|N06BA01 (KEGG:D02074)|N06BA01 (KEGG:D07445)	Amphetamine is indicated for the treatment of attention-deficit/hyperactivity disorders (ADHD) as well as for the treatment of central nervous system disorders such as narcolepsy.[A18540] ADHD is a complex disorder associated with the substantial heterogeneity in etiology, clinical presentation, and treatment outcome. ADHD comes from a complex interplay between interdependent genetic and non-gene…
D-00728	C[C@H](N)CC1=CC=CC=C1 (DrugBank:DB01576)|C[C@@H](Cc1ccccc1)N (IUPHAR:2147)|c1(ccccc1)C[C@H](C)N.S(=O)(=O)(O)O.c1(ccccc1)C[C@H](C)N (KEGG:D02078)|c1(ccccc1)C[C@@H](N)C (KEGG:D03740)|N[C@H](Cc1ccccc1)C (TTD:D0T3LF)|N[C@H](Cc1ccccc1)C (TTD:D0U5GS)	C[C@@H](Cc1ccccc1)N	135.206	2.2766	9	DrugBank:DB01576|IUPHAR:2147|KEGG:D02078|KEGG:D03740|TTD:D0T3LF|TTD:D0U5GS	Dextroamphetamine (DrugBank:DB01576)|dexamfetamine (IUPHAR:2147)|Dextroamphetamine sulfate (USP) (KEGG:D02078)|Dextroamphetamine (USAN) (KEGG:D03740)|Dextroamphetamine (TTD:D0T3LF)|dextroamphetamine sulfate (oral liquid, ADHD), Auriga (TTD:D0U5GS)	Approved; Illicit (DrugBank:DB01576)|Approved (IUPHAR:2147)	51-64-9 (DrugBank:DB01576)|51-63-8 (KEGG:D02078)|51-64-9 (KEGG:D03740)	N06BA02 (DrugBank:DB01576)|N06BA02 (KEGG:D02078)|N06BA02 (KEGG:D03740)	Used to treat attention deficit hyperactivity disorder (ADHD). (DrugBank:DB01576)|Synthetic organic (IUPHAR:2147)|Stimulant (central) (KEGG:D02078)|Stimulant (central) (KEGG:D03740)|Attention deficit hyperactivity disorder; Narcolepsy (TTD:D0T3LF)|Unspecified (TTD:D0U5GS)
D-00729	C[C@H](Cc1ccccc1)N (IUPHAR:2146)|c1cccc(c1)C[C@H](N)C.C(=O)(CCC(=O)O)O (KEGG:D04704)|N[C@@H](Cc1ccccc1)C (TTD:D07BAH)	C[C@H](Cc1ccccc1)N	135.206	2.2766	9	IUPHAR:2146|KEGG:D04704|TTD:D07BAH	R(-)amphetamine (IUPHAR:2146)|Levamfetamine succinate (USAN) (KEGG:D04704)|R(-)amphetamine (TTD:D07BAH)		5634-40-2 (KEGG:D04704)		Synthetic organic (IUPHAR:2146)|Appetite suppressant (KEGG:D04704)
D-00730	NCC(c1ccccc1)C (IUPHAR:5510)	NCC(c1ccccc1)C	135.206	2.4491	9	IUPHAR:5510	2-phenyl-propylamine (IUPHAR:5510)				Metabolite (IUPHAR:5510)
D-00736	O=C1NC=C(C#C)C(=O)N1 (DrugBank:DB03516)|[nH]1c(=O)[nH]cc(c1=O)C#C (KEGG:D03998)|O=c1[nH]c(=O)[nH]cc1C#C (TTD:D09QOR)	C#Cc1c[nH]c(=O)[nH]c1=O	136.108	-0.9555	6	DrugBank:DB03516|KEGG:D03998|TTD:D09QOR	Eniluracil (DrugBank:DB03516)|Eniluracil (USAN/INN) (KEGG:D03998)	Investigational (DrugBank:DB03516)	59989-18-3 (DrugBank:DB03516)|59989-18-3 (KEGG:D03998)		For the treatment of cancer in combination with 5-fluorouracil. (DrugBank:DB03516)|Antineoplastic, Antimetabolite (KEGG:D03998)|Hyperlipidaemia (TTD:D09QOR)
D-00740	O=C1N=CN=C2NNC=C12 (DrugBank:DB00437)|O=c1ncnc2c1c[nH][nH]2 (IUPHAR:6795)|O=c1ncnc2[nH][nH]cc12 (TTD:D04KYY)	O=c1ncnc2c1c[nH][nH]2	136.111	-0.3538	5	DrugBank:DB00437|IUPHAR:6795|TTD:D04KYY	Allopurinol (DrugBank:DB00437)|allopurinol (IUPHAR:6795)|Allopurinol (TTD:D04KYY)	Approved (DrugBank:DB00437)|Approved (IUPHAR:6795)	315-30-0 (DrugBank:DB00437)	M04AA01; M04AA51 (DrugBank:DB00437)	Allopurinol is indicated in [FDA label]: 1) the management of patients with signs and symptoms of primary or secondary gout (acute attacks, tophi, joint destruction, uric acid lithiasis, and/or nephropathy). 2) the management of patients with leukemia, lymphoma and malignancies who are receiving cancer therapy which causes elevations of serum and urinary uric acid levels. Treatment with allopurin…
D-00743	c12c(ncnc1O)[nH]nc2 (KEGG:D00224)	Oc1ncnc2c1cn[nH]2	136.111	0.0585	5	KEGG:D00224	Allopurinol (JP17/USP/INN) (KEGG:D00224)		315-30-0 (KEGG:D00224)	M04AA01 (KEGG:D00224)	Gout suppressant, Uric acid biosynthesis inhibitor, Xanthine oxidase inhibitor (KEGG:D00224)
D-00744	c1c(ccc(c1)N)C(=O)[O-].[K+] (KEGG:D02906)|c1c(ccc(c1)N)C(=O)[O-].[Na+] (KEGG:D02907)	[O-]C(=O)c1ccc(cc1)N	136.128	0.2135	7	KEGG:D02906|KEGG:D02907	Aminobenzoate potassium (USP) (KEGG:D02906)|Aminobenzoate sodium (USP) (KEGG:D02907)		138-84-1 (KEGG:D02906)|555-06-6 (KEGG:D02907)	D02BA01; D11AX23 (KEGG:D02906)|D02BA01 (KEGG:D02907)	Analgesic (KEGG:D02906)|Analgesic (KEGG:D02907)
D-00752	o1c(C2=NCCN2)ccc1 (TTD:D09ZDQ)	C1CN=C(N1)c1ccco1	136.151	0.3938	7	TTD:D09ZDQ
D-00754	O=C(N)c1cc(N)ccc1 (TTD:D0E7OJ)|O=C(N)c1cc(N)ccc1 (TTD:D0K2PD)	Nc1cccc(c1)C(=O)N	136.151	1.6492	7	TTD:D0E7OJ|TTD:D0K2PD
D-00757	CNCCC1=CC=CC=N1 (DrugBank:DB06698)|S(=O)(=O)(C)O.c1cnc(cc1)CCNC.S(=O)(=O)(C)O (KEGG:D01592)|c1cnc(cc1)CCNC.Cl.Cl (KEGG:D03102)|c1cnc(cc1)CCNC (KEGG:D07522)|N(CCc1ncccc1)C (TTD:D0XW9U)	CNCCc1ccccn1	136.194	1.2344	8	DrugBank:DB06698|KEGG:D01592|KEGG:D03102|KEGG:D07522|TTD:D0XW9U	Betahistine (DrugBank:DB06698)|Betahistine mesilate (JP17) (KEGG:D01592)|Betahistine hydrochloride (USP) (KEGG:D03102)|Betahistine (INN) (KEGG:D07522)	Approved; Investigational (DrugBank:DB06698)	5638-76-6 (DrugBank:DB06698)|54856-23-4 (KEGG:D01592)|5579-84-0 (KEGG:D03102)|5638-76-6 (KEGG:D07522)	N07CA01 (DrugBank:DB06698)|N07CA01 (KEGG:D01592)|N07CA01 (KEGG:D03102)|N07CA01 (KEGG:D07522)	For the reduction of episodes of vertigo association with M茅ni猫re's disease. (DrugBank:DB06698)|Antivertigo, Vasodilator, Antihistaminic (KEGG:D01592)|Antivertigo, Vasodilator, Antihistaminic (KEGG:D03102)|Antivertigo, Vasodilator, Antihistaminic (KEGG:D07522)
D-00761	NNCCC1=CC=CC=C1 (DrugBank:DB00780)|NNCCc1ccccc1 (IUPHAR:7266)|c1(ccccc1)CCNN.S(=O)(=O)(O)O (KEGG:D00505)|c1(ccccc1)CCNN (KEGG:D08349)|N(N)CCc1ccccc1 (TTD:D0P9AC)	NNCCc1ccccc1	136.194	1.7836	8	DrugBank:DB00780|IUPHAR:7266|KEGG:D00505|KEGG:D08349|TTD:D0P9AC	Phenelzine (DrugBank:DB00780)|phenelzine (IUPHAR:7266)|Phenelzine sulfate (USP) (KEGG:D00505)|Phenelzine (BAN) (KEGG:D08349)|Phenelzine (TTD:D0P9AC)	Approved (DrugBank:DB00780)|Approved (IUPHAR:7266)	51-71-8 (DrugBank:DB00780)|156-51-4 (KEGG:D00505)|51-71-8 (KEGG:D08349)	N06AF03 (DrugBank:DB00780)|N06AF03 (KEGG:D00505)|N06AF03 (KEGG:D08349)	Phenelzine is indicated for the treatment of nonendogenous, neurotic or atypical depression for patients that do not tolerate other forms of therapy.[L1356] Atypical depression has a high prevalence rate, starts in early life, tends to last longer, is more likely to occur in people with bipolar disorder, has a high comorbidity with anxiety disorder and carries more risk of suicidal behavior. It i…
D-00766	CC(=O)CBr (IUPHAR:6293)|BrCC(=O)C (TTD:D04NOT)	CC(=O)CBr	136.975	0.9703	3	IUPHAR:6293|TTD:D04NOT	bromoacetone (IUPHAR:6293)|bromoacetone (TTD:D04NOT)				Synthetic organic (IUPHAR:6293)
D-00771	NCCCP(=O)(O)C (IUPHAR:1080)|P(=O)(O)(CCCN)C (TTD:D01TQF)|P(=O)(O)(CCCN)C (TTD:D08LFC)	NCCCP(=O)(O)C	137.117	0.9357	4	IUPHAR:1080|TTD:D01TQF|TTD:D08LFC	3-APMPA (IUPHAR:1080)				Synthetic organic (IUPHAR:1080)
D-00779	ONC(=O)C1=CC=CC=C1 (DrugBank:DB01924)	ONC(=O)c1ccccc1	137.136	1.1965	7	DrugBank:DB01924	Benzhydroxamic Acid (DrugBank:DB01924)	Experimental (DrugBank:DB01924)	495-18-1 (DrugBank:DB01924)
D-00780	Oc1cc(ccc1)C(=O)N (TTD:D05ZTI)	Oc1cccc(c1)C(=O)N	137.136	1.1914	7	TTD:D05ZTI
D-00781	NNC(=O)C1=CC=NC=C1 (DrugBank:DB00951)|c1(C(=O)NN)ccncc1 (KEGG:D00346)|O=C(NN)c1ccncc1 (TTD:D09XQF)	NNC(=O)c1ccncc1	137.139	0.7763	6	DrugBank:DB00951|KEGG:D00346|TTD:D09XQF	Isoniazid (DrugBank:DB00951)|Isoniazid (JP17/USP/INN) (KEGG:D00346)|Isoniazid (TTD:D09XQF)	Approved; Investigational (DrugBank:DB00951)	54-85-3 (DrugBank:DB00951)|54-85-3 (KEGG:D00346)	J04AC01; J04AC51; J04AM01; J04AM02; J04AM03; J04AM04; J04AM05; J04AM06; J04AM07; J04AM08 (DrugBank:DB00951)|J04AC01 (KEGG:D00346)	For the treatment of all forms of tuberculosis in which organisms are susceptible. (DrugBank:DB00951)|Antibacterial (tuberculostatic) (KEGG:D00346)|Tuberculosis (TTD:D09XQF)
D-00788	NCCC1=CC=C(O)C=C1 (DrugBank:DB08841)|NCCc1ccc(cc1)O (IUPHAR:2148)|NCCc1ccc(cc1)O (IUPHAR:2150)|Oc1ccc(CCN)cc1 (TTD:D01VFT)|Oc1ccc(CCN)cc1 (TTD:D0C5RZ)	NCCc1ccc(cc1)O	137.179	1.5937	8	DrugBank:DB08841|IUPHAR:2148|IUPHAR:2150|TTD:D01VFT|TTD:D0C5RZ	Tyramine (DrugBank:DB08841)|[<sup>3</sup>H]tyramine (IUPHAR:2148)|tyramine (IUPHAR:2150)|[3H]tyramine (TTD:D01VFT)|tyramine (TTD:D0C5RZ)	Investigational; Nutraceutical (DrugBank:DB08841)|Labelled; Radioactive (IUPHAR:2148)	51-67-2 (DrugBank:DB08841)		Metabolite (IUPHAR:2148)|Metabolite (IUPHAR:2150)
D-00796	OC1=CC=C(C=O)C=C1O (DrugBank:DB11268)	O=Cc1ccc(c(c1)O)O	138.121	0.9103	7	DrugBank:DB11268	Protocatechualdehyde (DrugBank:DB11268)	Approved (DrugBank:DB11268)
D-00797	OC(=O)C1=CC=CC=C1O (DrugBank:DB00936)|OC(=O)c1ccccc1O (IUPHAR:4306)|c1(c(cccc1)O)C(=O)O (KEGG:D00097)|c1cccc(c1C(=O)O)O.c1cnc[nH]1 (KEGG:D07293)|c1(c(cccc1)O)C(=O)O.N(CCO)(CCO)CCO (KEGG:D08501)|Oc1c(cccc1)C(=O)O (TTD:D03RXH)|Oc1c(cccc1)C(=O)O (TTD:D07HBX)|c1(C(=O)O)c(O)cccc1.N(CCO)(CCO)CCO (TTD:D0A5CM)|c1(C(=O)O)c(O)cccc1.n1c[nH]cc1 (TTD:D0F5ZM)	OC(=O)c1ccccc1O	138.121	1.0904	7	DrugBank:DB00936|IUPHAR:4306|KEGG:D00097|KEGG:D07293|KEGG:D08501|TTD:D03RXH|TTD:D07HBX|TTD:D0A5CM|TTD:D0F5ZM	Salicylic acid (DrugBank:DB00936)|salicylic acid (IUPHAR:4306)|Salicylic acid (JP17/USP) (KEGG:D00097)|Imidazole salicylate (INN) (KEGG:D07293)|Trolamine salicylate (USP) (KEGG:D08501)|Salicyclic acid (TTD:D07HBX)|Imidazole salicylate (TTD:D0F5ZM)	Approved; Investigational; Vet_approved (DrugBank:DB00936)|Approved (IUPHAR:4306)	69-72-7 (DrugBank:DB00936)|69-72-7 (KEGG:D00097)|36364-49-5 (KEGG:D07293)|2174-16-5 (KEGG:D08501)	D01AE12; N02BA04; N02BA12; S01BC08 (DrugBank:DB00936)|D01AE12; S01BC08 (KEGG:D00097)|N02BA16 (KEGG:D07293)|D03AX12 (KEGG:D08501)	Key additive in many skin-care products for the treatment of acne, psoriasis, callouses, corns, keratosis pilaris and warts. (DrugBank:DB00936)|Natural product (IUPHAR:4306)|Antifungal, Keratolytic (KEGG:D00097)|Analgesic, Anti-inflammatory (KEGG:D07293)|Analgesic, Anti-inflammatory, Antipyretic, Keratolytic (KEGG:D08501)|Acne vulgaris; Dermatitis (TTD:D07HBX)|Pain (TTD:D0A5CM)|Inflammatory disea…
D-00798	OC(=O)C1=CC=C(O)C=C1 (DrugBank:DB04242)	Oc1ccc(cc1)C(=O)O	138.121	1.0904	7	DrugBank:DB04242	P-Hydroxybenzoic Acid (DrugBank:DB04242)	Experimental (DrugBank:DB04242)
D-00802	O=C(N)CCc1c[nH]cc1 (TTD:D01HUQ)	NC(=O)CCc1c[nH]cc1	138.167	1.1329	7	TTD:D01HUQ
D-00807	N1=C(N)C2C(CCCC2)C1 (TTD:D07INO)	NC1=NCC2C1CCCC2	138.21	1.2995	8	TTD:D07INO
D-00808	SCc1ccc(cc1)C (TTD:D0K3SZ)	SCc1ccc(cc1)C	138.23	2.4248	8	TTD:D0K3SZ
D-00817	CN1C=CC(=O)C(O)=C1C (DrugBank:DB08826)|Cn1ccc(=O)c(c1C)O (IUPHAR:7456)|c1cc(=O)c(c(n1C)C)O (KEGG:D07416)|Oc1c(n(ccc1=O)C)C (TTD:D0N0OU)	Cn1ccc(=O)c(c1C)O	139.152	0.3993	7	DrugBank:DB08826|IUPHAR:7456|KEGG:D07416|TTD:D0N0OU	Deferiprone (DrugBank:DB08826)|deferiprone (IUPHAR:7456)|Deferiprone (USAN/INN) (KEGG:D07416)|Deferiprone (TTD:D0N0OU)	Approved (DrugBank:DB08826)|Approved (IUPHAR:7456)	30652-11-0 (DrugBank:DB08826)|30652-11-0 (KEGG:D07416)	V03AC02 (DrugBank:DB08826)|V03AC02 (KEGG:D07416)	Deferiprone is indicated in thalassemia syndromes when first line chelation agents are not adequate to treat transfusional iron overload. (DrugBank:DB08826)|Synthetic organic (IUPHAR:7456)|Antidote (iron), Chelating agent (KEGG:D07416)|Transfusional iron overload due to thalassaemia syndromes (TTD:D0N0OU)
D-00818	OC(=O)C1=CC=CC(N)C1 (TTD:D03DVF)	NC1C=CC=C(C1)C(=O)O	139.152	0.9849	7	TTD:D03DVF
D-00828	NCCCCc1cnc[nH]1 (IUPHAR:1249)|[nH]1c(CCCCN)cnc1 (TTD:D0E5XM)	NCCCCc1cnc[nH]1	139.198	1.3914	7	IUPHAR:1249|TTD:D0E5XM	imbutamine (IUPHAR:1249)				Synthetic organic (IUPHAR:1249)
D-00835	OC(=O)CP(O)(O)=O (DrugBank:DB02823)	OC(=O)CP(=O)(O)O	140.032	-0.7513	2	DrugBank:DB02823	Phosphonoacetic Acid (DrugBank:DB02823)	Experimental (DrugBank:DB02823)	4408-78-0 (DrugBank:DB02823)
D-00841	O=C1NOC2=C1CCNC2 (DrugBank:DB06554)|O=c1[nH]oc2c1CCNC2 (IUPHAR:4322)|c12c(=O)[nH]oc1CNCC2 (KEGG:D04282)|o1[nH]c(=O)c2CCNCc12 (TTD:D00EEL)|Cl.o1[nH]c(=O)c2CCNCc12 (TTD:D00XNY)	O=c1[nH]oc2c1CCNC2	140.14	-0.0576	6	DrugBank:DB06554|IUPHAR:4322|KEGG:D04282|TTD:D00EEL|TTD:D00XNY	Gaboxadol (DrugBank:DB06554)|gaboxadol (IUPHAR:4322)|Gaboxadol (USAN/INN) (KEGG:D04282)|Gaboxadol (TTD:D00EEL)	Investigational (DrugBank:DB06554)	64603-91-4 (DrugBank:DB06554)|64603-91-4 (KEGG:D04282)		Investigated for use/treatment in sleep disorders and insomnia. (DrugBank:DB06554)|Synthetic organic (IUPHAR:4322)|Hypnotic (KEGG:D04282)|Insomnia (TTD:D00EEL)
D-00850	N1=C(N)CC(C1CCC)C (TTD:D05APC)	CC1CC(=NC1CCC)N	140.226	1.688	8	TTD:D05APC
D-00851	N\1=C(/N)\CCCCCCC1 (TTD:D02MFQ)	N/C/1=N/CCCCCCC1	140.226	1.8337	8	TTD:D02MFQ
D-00854	NC[C@@H](F)CP(O)=O (DrugBank:DB11920)|NC[C@H](CP(=O)O)F (IUPHAR:7705)|P(=O)(O)C[C@H](F)CN (TTD:D03FFY)	NC[C@H](CP(=O)O)F	141.081	0.4505	3	DrugBank:DB11920|IUPHAR:7705|TTD:D03FFY	Lesogaberan (DrugBank:DB11920)|lesogaberan (IUPHAR:7705)	Investigational (DrugBank:DB11920)	344413-67-8 (DrugBank:DB11920)		Synthetic organic (IUPHAR:7705)|Gastroesophageal reflux disease (TTD:D03FFY)
D-00870	OCC1=CC(=O)C(O)=CO1 (DrugBank:DB01759)|o1c(cc(=O)c(O)c1)CO (TTD:D0F3CO)	OCc1occ(c(=O)c1)O	142.109	-0.1623	6	DrugBank:DB01759|TTD:D0F3CO	Kojic acid (DrugBank:DB01759)	Experimental (DrugBank:DB01759)	501-30-4 (DrugBank:DB01759)
D-00876	NC(=O)CN1CCCC1=O (IUPHAR:4288)|N1(CC(=O)N)C(=O)CCC1 (KEGG:D01914)|O=C1N(CCC1)CC(=O)N (TTD:D0Q4YK)	NC(=O)CN1CCCC1=O	142.156	-0.2677	6	IUPHAR:4288|KEGG:D01914|TTD:D0Q4YK	piracetam (IUPHAR:4288)|Piracetam (JAN/USAN/INN) (KEGG:D01914)|Piracetam (TTD:D0Q4YK)	Approved (IUPHAR:4288)	7491-74-9 (KEGG:D01914)	N06BX03 (KEGG:D01914)	Synthetic organic (IUPHAR:4288)|Anticonvulsant, Nootropic (KEGG:D01914)|Cognitive disorders (TTD:D0Q4YK)
D-00881	SCc1ccc(F)cc1 (TTD:D0PR7L)	SCc1ccc(cc1)F	142.194	2.2555	7	TTD:D0PR7L
D-00903	CCCCCCCNC=O (DrugBank:DB04105)	CCCCCCCNC=O	143.227	2.7296	8	DrugBank:DB04105	N-Heptylformamide (DrugBank:DB04105)	Experimental (DrugBank:DB04105)
D-00914	NC1=CC=CC2=C1C=CN=C2 (DrugBank:DB04605)	Nc1cccc2c1ccnc2	144.173	2.3982	9	DrugBank:DB04605	5-Aminoisoquinoline (DrugBank:DB04605)	Experimental (DrugBank:DB04605)	1125-60-6 (DrugBank:DB04605)
D-00918	CCCCCCCC(O)=O (DrugBank:DB04519)|CCCCCCCC(=O)O (IUPHAR:4585)|C(CCCCC)CC(=O)O (KEGG:D05220)|OC(=O)CCCCCCC (TTD:D0XS4G)	CCCCCCCC(=O)O	144.211	2.4315	8	DrugBank:DB04519|IUPHAR:4585|KEGG:D05220|TTD:D0XS4G	Caprylic acid (DrugBank:DB04519)|octanoic acid (IUPHAR:4585)|Octanoic acid (USAN/INN) (KEGG:D05220)	Investigational (DrugBank:DB04519)	124-07-2 (DrugBank:DB04519)|124-07-2 (KEGG:D05220)		Metabolite (IUPHAR:4585)|Antifungal (KEGG:D05220)
D-00924	S1CC(N=C(N)CC1)C (TTD:D08WEI)	CC1CSCCC(=N1)N	144.238	1.0049	6	TTD:D08WEI
D-00925	S1C(CN=C(N)CC1)C (TTD:D0SB5H)	CC1SCCC(=NC1)N	144.238	1.0049	6	TTD:D0SB5H
D-00926	S1C(CC(=NCC1)N)C (TTD:D01EHS)	CC1SCCN=C(C1)N	144.238	1.0049	6	TTD:D01EHS
D-00940	O=c1[nH]ccc2c1cccc2 (TTD:D07CRG)	O=c1[nH]ccc2c1cccc2	145.158	1.5281	9	TTD:D07CRG
D-00941	O=C1NC2=CC=CC=C2C=C1 (DrugBank:DB04745)|O=c1[nH]c2c(cc1)cccc2 (TTD:D09VTE)	O=c1ccc2c([nH]1)cccc2	145.158	1.5281	9	DrugBank:DB04745|TTD:D09VTE	2-OXOQUINOLINE (DrugBank:DB04745)	Experimental (DrugBank:DB04745)			Bacterial infection (TTD:D09VTE)
D-00942	OC1=CC=CC2=C1N=CC=C2 (DrugBank:DB11145)|c1ccc2c(c1O)nccc2.S(=O)(=O)(O)O.c1ccc2c(nccc2)c1O (KEGG:D02414)|c1ccc2c(c1O)nccc2 (KEGG:D05321)|Oc1c2ncccc2ccc1 (TTD:D0FO2B)	Oc1cccc2c1nccc2	145.158	1.9404	9	DrugBank:DB11145|KEGG:D02414|KEGG:D05321|TTD:D0FO2B	Oxyquinoline (DrugBank:DB11145)|Oxyquinoline sulfate (NF) (KEGG:D02414)|Oxyquinoline (USAN) (KEGG:D05321)	Approved; Vet_approved (DrugBank:DB11145)	148-24-3 (DrugBank:DB11145)|134-31-6 (KEGG:D02414)|148-24-3 (KEGG:D05321)	A01AB07; D08AH03; G01AC30; R02AA14 (DrugBank:DB11145)|A01AB07; D08AH03; G01AC30; R02AA14 (KEGG:D02414)|A01AB07; D08AH03; G01AC30; R02AA14 (KEGG:D05321)	Oxyquinoline is used as a biocidal component of several over the counter products. These products are marketed for the purposes of inhibiting abnormal biological growth in the vagina and restoring natural pH. (DrugBank:DB11145)|Disinfectant (KEGG:D02414)|Disinfectant (KEGG:D05321)
D-00955	NCCCCNCCCN (DrugBank:DB03566)|NCCCNCCCCN (IUPHAR:2390)|N(CCCCN)CCCN (TTD:D08BXT)	NCCCNCCCCN	145.246	1.4552	7	DrugBank:DB03566|IUPHAR:2390|TTD:D08BXT	Spermidine (DrugBank:DB03566)|spermidine (IUPHAR:2390)	Experimental (DrugBank:DB03566)	124-20-9 (DrugBank:DB03566)		Metabolite (IUPHAR:2390)
D-00957	OC(=O)CCC(=O)C(O)=O (DrugBank:DB08845)|OC(=O)CCC(=O)C(=O)O (IUPHAR:3636)|OC(=O)CCC(=O)C(=O)O (TTD:D09KQZ)	OC(=O)CCC(=O)C(=O)O	146.098	-0.4951	5	DrugBank:DB08845|IUPHAR:3636|TTD:D09KQZ	Oxogluric acid (DrugBank:DB08845)|&alpha;-ketoglutaric acid (IUPHAR:3636)|alpha-ketoglutaric acid (TTD:D09KQZ)	Experimental; Investigational; Nutraceutical (DrugBank:DB08845)	328-50-7 (DrugBank:DB08845)		伪-伪-Ketoglutarate is not approved for any indication in the world but is an investigational drug in the United States. The potential indications for 伪-Ketoglutarate are in patients with the metabolic disorder propionic acidemia and in trauma patients with muscle loss. (DrugBank:DB08845)|Metabolite (IUPHAR:3636)
D-00959	s1[nH]c(=O)c(n1)C(=O)O (TTD:D0T3PV)	OC(=O)c1ns[nH]c1=O	146.125	-0.4704	3	TTD:D0T3PV
D-00960	OC(=O)C1=NSN=C1O (DrugBank:DB03162)	OC(=O)c1nsnc1O	146.125	-0.0581	3	DrugBank:DB03162	4-Hydroxy-1,2,5-Thiadiazole-3-Carboxylic Acid (DrugBank:DB03162)	Experimental (DrugBank:DB03162)
D-00965	O=C1Cc2c(C1=O)cccc2 (TTD:D01XGP)	O=C1C(=O)Cc2c1cccc2	146.143	0.9945	9	TTD:D01XGP
D-00966	O=C1OC2=CC=CC=C2C=C1 (DrugBank:DB04665)|c12c(ccc(=O)o1)cccc2 (KEGG:D07751)	O=c1ccc2c(o1)cccc2	146.143	1.793	9	DrugBank:DB04665|KEGG:D07751	Coumarin (DrugBank:DB04665)|Coumarin (DCF) (KEGG:D07751)	Experimental (DrugBank:DB04665)	91-64-5 (DrugBank:DB04665)|91-64-5 (KEGG:D07751)		Vascular protectant (KEGG:D07751)
D-00983	CC(=O)OCC[N+](C)(C)C (DrugBank:DB03128)|CC(=O)OCC[N+](C)(C)C (IUPHAR:294)|CC(=O)OCC[N+](C)(C)C (IUPHAR:8593)|[N+](CCOC(=O)C)(C)(C)C.[Cl-] (KEGG:D00999)|O(CC[N+](C)(C)C)C(=O)C (TTD:D04GON)|O(CC[N+](C)(C)C)C(=O)C (TTD:D0Q9HF)	CC(=O)OCC[N+](C)(C)C	146.207	0.2557	7	DrugBank:DB03128|IUPHAR:294|IUPHAR:8593|KEGG:D00999|TTD:D04GON|TTD:D0Q9HF	Acetylcholine (DrugBank:DB03128)|acetylcholine (IUPHAR:294)|[<sup>3</sup>H]acetylcholine (IUPHAR:8593)|Acetylcholine chloride (JP17/USP/INN) (KEGG:D00999)|Acetylcholine (TTD:D0Q9HF)	Approved; Investigational (DrugBank:DB03128)|Labelled; Radioactive (IUPHAR:8593)	51-84-3 (DrugBank:DB03128)|60-31-1 (KEGG:D00999)	S01EB09 (DrugBank:DB03128)|S01EB09 (KEGG:D00999)	Used to obtain miosis of the iris in seconds after delivery of the lens in cataract surgery, in penetrating keratoplasty, iridectomy and other anterior segment surgery where rapid miosis may be required. (DrugBank:DB03128)|Metabolite (IUPHAR:294)|Synthetic organic (IUPHAR:8593)|Miotic, Vasodilator (peripheral), Cholinergic receptor agonist (KEGG:D00999)|Cataract (TTD:D0Q9HF)
D-00989	OB(O)c1ccc(cc1)C#N (TTD:D0AW4G)	N#Cc1ccc(cc1)B(O)O	146.939	-0.76192	7	TTD:D0AW4G
D-00992	OC(=O)CNC(=O)C(=O)O (TTD:D08IZY)	OC(=O)CNC(=O)C(=O)O	147.086	-1.3373	4	TTD:D08IZY
D-00995	CN[C@@H](C(=O)O)CC(=O)O (IUPHAR:4268)|OC(=O)[C@H](NC)CC(=O)O (TTD:D01NAK)|OC(=O)[C@H](NC)CC(=O)O (TTD:D06GKL)	CN[C@@H](C(=O)O)CC(=O)O	147.129	-0.4754	5	IUPHAR:4268|TTD:D01NAK|TTD:D06GKL	NMDA (IUPHAR:4268)				Synthetic organic (IUPHAR:4268)
D-00996	C(CCC(=O)O)(C(=O)O)N (KEGG:D04341)	OC(=O)CCC(C(=O)O)N	147.129	-0.0366	5	KEGG:D04341	Glutamic acid (USAN) (KEGG:D04341)		617-65-2 (KEGG:D04341)		Supplement (glutamic acid) (KEGG:D04341)
D-00997	N[C@@H](CCC(O)=O)C(O)=O (DrugBank:DB00142)|OC(=O)CC[C@@H](C(=O)O)N (IUPHAR:1369)|[C@H](CCC(=O)O)(C(=O)O)N (KEGG:D00007)|OC(=O)CN.OC(=O)[C@H](C)N.OC(=O)[C@H](CCC(=O)O)N (KEGG:D04480)|[C@H](CCC(=O)O)(C(=O)O)N.Cl (KEGG:D07539)|OC(=O)[C@@H](N)CCC(=O)O (TTD:D00ENY)	OC(=O)CC[C@@H](C(=O)O)N	147.129	-0.0366	5	DrugBank:DB00142|IUPHAR:1369|KEGG:D00007|KEGG:D04480|KEGG:D07539|TTD:D00ENY	Glutamic Acid (DrugBank:DB00142)|L-glutamic acid (IUPHAR:1369)|Glutamic acid (USP) (KEGG:D00007)|L-Glutamic acid, L-alanine and glycine (KEGG:D04480)|Glutamic acid hydrochloride (KEGG:D07539)|L-Glutamic Acid (TTD:D00ENY)	Approved; Nutraceutical (DrugBank:DB00142)	56-86-0 (DrugBank:DB00142)|56-86-0 (KEGG:D00007)|8058-79-5 (KEGG:D04480)|138-15-8 (KEGG:D07539)	A09AB01 (DrugBank:DB00142)|A09AB01 (KEGG:D07539)	Considered to be nature's "Brain food" by improving mental capacities; helps speed the healing of ulcers; gives a "lift" from fatigue; helps control alcoholism, schizophrenia and the craving for sugar. (DrugBank:DB00142)|Metabolite (IUPHAR:1369)|Dietary supplement (KEGG:D00007)|Antidysuria (KEGG:D04480)|Supplement (amino acid) (KEGG:D07539)|Indigestion; Schizophrenia (TTD:D00ENY)
D-00998	N[C@H](CCC(O)=O)C(O)=O (DrugBank:DB02517)|OC(=O)CC[C@H](C(=O)O)N (IUPHAR:4708)|OC(=O)[C@H](N)CCC(=O)O (TTD:D0O1AK)|OC(=O)[C@H](N)CCC(=O)O (TTD:D0YB9P)	OC(=O)CC[C@H](C(=O)O)N	147.129	-0.0366	5	DrugBank:DB02517|IUPHAR:4708|TTD:D0O1AK|TTD:D0YB9P	D-Glutamic Acid (DrugBank:DB02517)|D-glutamic acid (IUPHAR:4708)|D-glutamic acid (TTD:D0O1AK)	Experimental (DrugBank:DB02517)	6893-26-1 (DrugBank:DB02517)		Metabolite (IUPHAR:4708)
D-01002	O=C1NC2=CC=CC=C2C1=O (DrugBank:DB02095)|O=C1c2c(NC1=O)cccc2 (TTD:D03NEO)|O=C1c2c(NC1=O)cccc2 (TTD:D0SP2O)	O=C1C(=O)Nc2c1cccc2	147.131	0.9594	8	DrugBank:DB02095|TTD:D03NEO|TTD:D0SP2O	Isatin (DrugBank:DB02095)	Experimental (DrugBank:DB02095)	91-56-5 (DrugBank:DB02095)
D-01003	O=C1c2[nH]ccc2C(=O)C=C1 (TTD:D0TM0Z)	O=C1C=CC(=O)c2c1[nH]cc2	147.131	0.9499	8	TTD:D0TM0Z
D-01012	O[C@H]1[C@@H](CNC[C@@H]1O)CO (TTD:D00MFZ)	OC[C@@H]1CNC[C@@H]([C@H]1O)O	147.172	-1.7513	6	TTD:D00MFZ
D-01013	OC[C@H]1CNC[C@@H](O)[C@@H]1O (DrugBank:DB04545)|OC[C@H]1CNC[C@H]([C@@H]1O)O (IUPHAR:7410)|[C@H]1([C@H]([C@@H](CNC1)O)O)CO (KEGG:D09576)|[C@@H]([C@H](C(=O)O)O)(C(=O)O)O.[C@H]1([C@H]([C@@H](CNC1)O)O)CO (KEGG:D09577)|O[C@@H]1[C@H](CNC[C@H]1O)CO (TTD:D04BQV)	OC[C@H]1CNC[C@H]([C@@H]1O)O	147.172	-1.7513	6	DrugBank:DB04545|IUPHAR:7410|KEGG:D09576|KEGG:D09577|TTD:D04BQV	Afegostat (DrugBank:DB04545)|afegostat (IUPHAR:7410)|Afegostat (USAN/INN) (KEGG:D09576)|Afegostat tartrate (USAN) (KEGG:D09577)|Isofagomine tartrate (TTD:D04BQV)	Experimental; Investigational (DrugBank:DB04545)	169105-89-9 (DrugBank:DB04545)|169105-89-9 (KEGG:D09576)|919364-56-0 (KEGG:D09577)		Synthetic organic (IUPHAR:7410)|Hypoglycemic, Enhancer (beta-glucocerebrosidase) (KEGG:D09576)|Hypoglycemic, Enhancer (beta-glucocerebrosidase) (KEGG:D09577)|Metabolic disease (TTD:D04BQV)
D-01014	O[C@@H]1[C@@H](NC[C@@H](O)[C@@H]1O)C (TTD:D01MFK)	O[C@@H]1CN[C@H]([C@H]([C@H]1O)O)C	147.172	-1.6104	6	TTD:D01MFK					Pain (TTD:D01MFK)
D-01016	O=C1Nc2c(CC1)cccc2 (TTD:D08BIP)	O=C1CCc2c(N1)cccc2	147.174	1.7093	9	TTD:D08BIP
D-01019	C[N+](C)(C)CCOC(N)=O (DrugBank:DB00411)|NC(=O)OCC[N+](C)(C)C (IUPHAR:298)|[N+](CCOC(=O)N)(C)(C)C.[Cl-] (KEGG:D00524)|O(CC[N+](C)(C)C)C(=O)N (TTD:D0U7BW)	NC(=O)OCC[N+](C)(C)C	147.195	0.4882	6	DrugBank:DB00411|IUPHAR:298|KEGG:D00524|TTD:D0U7BW	Carbamoylcholine (DrugBank:DB00411)|carbachol (IUPHAR:298)|Carbachol (JAN/USP/INN) (KEGG:D00524)|Carbachol (TTD:D0U7BW)	Approved (DrugBank:DB00411)|Approved (IUPHAR:298)	462-58-8 (DrugBank:DB00411)|51-83-2 (KEGG:D00524)	N07AB01; S01EB02 (DrugBank:DB00411)|N07AB01; S01EB02 (KEGG:D00524)	Primarily used in the treatment of glaucoma, but is also used during ophthalmic surgery. (DrugBank:DB00411)|Synthetic organic (IUPHAR:298)|Antihypertensive (intraocular), Muscarinic acetylcholine receptor agonist (KEGG:D00524)|Glaucoma (TTD:D0U7BW)
D-01027	SC(=S)N1CCCC1 (TTD:D0B0IJ)	SC(=S)N1CCCC1	147.262	1.2348	5	TTD:D0B0IJ
D-01043	C=CC(=O)c1ccc(cc1)O (IUPHAR:8841)|Oc1ccc(cc1)C(=O)C=C (TTD:D0L7RB)	C=CC(=O)c1ccc(cc1)O	148.159	1.7609	9	IUPHAR:8841|TTD:D0L7RB	4-acryloylphenol (IUPHAR:8841)				Synthetic organic (IUPHAR:8841)
D-01044	O=C(c1ccccc1)C(=O)C (TTD:D02TLP)	O=C(c1ccccc1)C(=O)C	148.159	1.4583	9	TTD:D02TLP
D-01045	OC(=O)/C=C/c1ccccc1 (IUPHAR:3203)|OC(=O)/C=C/c1ccccc1 (TTD:D0T2QL)	OC(=O)/C=C/c1ccccc1	148.159	1.7844	9	IUPHAR:3203|TTD:D0T2QL	cinnamic acid (IUPHAR:3203)				Synthetic organic (IUPHAR:3203)
D-01052	O=c1n([nH]c2c1cccc2)C (TTD:D0U8CM)	Cn1[nH]c2c(c1=O)cccc2	148.162	0.8666	8	TTD:D0U8CM
D-01053	CSCCC(=O)C(O)=O (DrugBank:DB02238)	CSCCC(=O)C(=O)O	148.18	0.3932	5	DrugBank:DB02238	4-(Methylsulfanyl)-2-Oxobutanoic Acid (DrugBank:DB02238)	Experimental (DrugBank:DB02238)
D-01060	n1c(cc(cc1N)C)/C=C/C (TTD:D0U8OA)	C/C=C/c1cc(C)cc(n1)N	148.205	2.5865	9	TTD:D0U8OA
D-01063	Cl.N(N)CC(=C)c1ccccc1 (TTD:D02PSR)	NNCC(=C)c1ccccc1	148.205	2.2543	9	TTD:D02PSR
D-01080	n1(c2ncnc(N)c2nc1)C (TTD:D04JIR)	Nc1ncnc2c1ncn2C	149.153	0.5267	6	TTD:D04JIR	9-Methyl-9H-adenine (TTD:D04JIR)
D-01090	[H][C@](N)(C(O)=O)C(C)(C)S (DrugBank:DB00859)|N[C@H](C(S)(C)C)C(=O)O (IUPHAR:7264)|C(=O)([C@@H](C(S)(C)C)N)O (KEGG:D00496)|Cl.C(=O)([C@@H](C(S)(C)C)N)O (KEGG:D08330)|SC([C@@H](N)C(=O)O)(C)C (TTD:D08HZC)|SC([C@@H](N)C(=O)O)(C)C (TTD:D0E2GG)	N[C@H](C(S)(C)C)C(=O)O	149.211	0.807	5	DrugBank:DB00859|IUPHAR:7264|KEGG:D00496|KEGG:D08330|TTD:D08HZC|TTD:D0E2GG	Penicillamine (DrugBank:DB00859)|penicillamine (IUPHAR:7264)|Penicillamine (JAN/USP/INN) (KEGG:D00496)|Penicillamine hydrochloride (KEGG:D08330)|Penicillamine (TTD:D08HZC)	Approved (DrugBank:DB00859)|Approved (IUPHAR:7264)	52-67-5 (DrugBank:DB00859)|52-67-5 (KEGG:D00496)|2219-30-9 (KEGG:D08330)	M01CC01 (DrugBank:DB00859)|M01CC01 (KEGG:D00496)|M01CC01 (KEGG:D08330)	For treatment of Wilson's disease, cystinuria and active rheumatoid arthritis. (DrugBank:DB00859)|Synthetic organic (IUPHAR:7264)|Antidote, Antirheumatic, Chelating agent (KEGG:D00496)|Antidote, Antirheumatic, Chelating agent (KEGG:D08330)|Rheumatoid arthritis (TTD:D08HZC)
D-01091	CC(C)(N)CC1=CC=CC=C1 (DrugBank:DB00191)|CC(Cc1ccccc1)(N)C (IUPHAR:7269)|c1(CC(C)(C)N)ccccc1 (KEGG:D05458)|c1(CC(C)(C)N)ccccc1.Cl (KEGG:D05459)|NC(Cc1ccccc1)(C)C (TTD:D0U0RZ)	CC(Cc1ccccc1)(N)C	149.233	2.6667	10	DrugBank:DB00191|IUPHAR:7269|KEGG:D05458|KEGG:D05459|TTD:D0U0RZ	Phentermine (DrugBank:DB00191)|phentermine (IUPHAR:7269)|Phentermine (USAN/INN) (KEGG:D05458)|Phentermine hydrochloride (USP) (KEGG:D05459)|Phentermine (TTD:D0U0RZ)	Approved; Illicit (DrugBank:DB00191)|Approved (IUPHAR:7269)	122-09-8 (DrugBank:DB00191)|122-09-8 (KEGG:D05458)|1197-21-3 (KEGG:D05459)	A08AA01 (DrugBank:DB00191)|A08AA01 (KEGG:D05458)|A08AA01 (KEGG:D05459)	Phentermine is indicated, alone or in combination with topiramate, as a short-term adjunct, not pass a few weeks, in a regimen of weight reduction based on exercise, behavioral modifications and caloric restriction in the management of exogenous obesity for patients with an initial body mass index (BMI) greater than 30 kg/m2 or greater than 27 kg/m2 in presence of other risk factors such as contr…
D-01093	CNC(Cc1ccccc1)C (IUPHAR:4803)	CNC(Cc1ccccc1)C	149.233	2.2279	10	IUPHAR:4803	methamphetamine (IUPHAR:4803)	Approved (IUPHAR:4803)			Synthetic organic (IUPHAR:4803)
D-01094	CN[C@H](C)CC1=CC=CC=C1 (DrugBank:DB09571)|c1ccc(cc1)C[C@H](NC)C (KEGG:D02291)	CN[C@@H](Cc1ccccc1)C	149.233	2.2279	10	DrugBank:DB09571|KEGG:D02291	Levmetamfetamine (DrugBank:DB09571)|Levmetamfetamine (USP/INN) (KEGG:D02291)	Approved (DrugBank:DB09571)	33817-09-3 (DrugBank:DB09571)|33817-09-3 (KEGG:D02291)		Among its physiological effects are the vasoconstriction that makes it useful for nasal decongestion. (DrugBank:DB09571)|Nasal decongestant (KEGG:D02291)
D-01095	CN[C@@H](C)CC1=CC=CC=C1 (DrugBank:DB01577)|c1(C[C@@H](NC)C)ccccc1.Cl (KEGG:D02242)|c1(C[C@@H](NC)C)ccccc1 (KEGG:D08187)|N([C@H](Cc1ccccc1)C)C (TTD:D03FPU)|N([C@H](Cc1ccccc1)C)C (TTD:D0P6UB)	CN[C@H](Cc1ccccc1)C	149.233	2.2279	10	DrugBank:DB01577|KEGG:D02242|KEGG:D08187|TTD:D03FPU|TTD:D0P6UB	Metamfetamine (DrugBank:DB01577)|Methamphetamine hydrochloride (JP17/USP) (KEGG:D02242)|Metamfetamine (INN) (KEGG:D08187)|Methamphetamine (TTD:D0P6UB)	Approved; Illicit (DrugBank:DB01577)	537-46-2 (DrugBank:DB01577)|51-57-0 (KEGG:D02242)|537-46-2 (KEGG:D08187)	N06BA03 (DrugBank:DB01577)|N06BA03 (KEGG:D02242)|N06BA03 (KEGG:D08187)	For the treatment of Attention Deficit Disorder with Hyperactivity (ADHD) and exogenous obesity. (DrugBank:DB01577)|Psychostimulant, Stimulant (central) (KEGG:D02242)|Psychostimulant, Stimulant (central) (KEGG:D08187)|Inflammatory diseases; Pain (TTD:D03FPU)|Attention deficit hyperactivity disorder (TTD:D0P6UB)
D-01097	CCN(CC)C(S)=S (DrugBank:DB02520)	CCN(C(=S)S)CC	149.278	1.5429	5	DrugBank:DB02520	Ditiocarb (DrugBank:DB02520)	Experimental (DrugBank:DB02520)	147-84-2 (DrugBank:DB02520)
D-01129	CC(c1ccc(c(c1)O)C)C (IUPHAR:2497)|Oc1cc(C(C)C)ccc1C (TTD:D07JDC)	CC(c1ccc(c(c1)O)C)C	150.218	2.824	10	IUPHAR:2497|TTD:D07JDC	carvacrol (IUPHAR:2497)				Natural product (IUPHAR:2497)
D-01133	n1c(CCC)cc(cc1N)C (TTD:D02TMX)	CCCc1cc(C)cc(n1)N	150.221	2.5059	9	TTD:D02TMX
D-01139	Nc1[nH]c(=O)c2c(n1)[nH]cn2 (IUPHAR:4556)	Nc1[nH]c(=O)c2c(n1)[nH]cn2	151.126	-0.1904	5	IUPHAR:4556	guanine (IUPHAR:4556)				Metabolite (IUPHAR:4556)
D-01145	CC(=O)NC1=CC=C(O)C=C1 (DrugBank:DB00316)|CC(=O)Nc1ccc(cc1)O (IUPHAR:5239)|c1(ccc(cc1)O)NC(=O)C (KEGG:D00217)|Oc1ccc(NC(=O)C)cc1 (TTD:D0U5QK)|Oc1ccc(NC(=O)C)cc1 (TTD:D0U9NY)	CC(=O)Nc1ccc(cc1)O	151.163	1.4236	8	DrugBank:DB00316|IUPHAR:5239|KEGG:D00217|TTD:D0U5QK|TTD:D0U9NY	Acetaminophen (DrugBank:DB00316)|paracetamol (IUPHAR:5239)|Acetaminophen (JP17/USP) (KEGG:D00217)|Acetaminophen (TTD:D0U5QK)	Approved (DrugBank:DB00316)|Approved (IUPHAR:5239)	103-90-2 (DrugBank:DB00316)|103-90-2 (KEGG:D00217)	N02AJ01; N02AJ06; N02AJ13; N02AJ17; N02BE01; N02BE51; N02BE71 (DrugBank:DB00316)|N02BE01 (KEGG:D00217)	For the treatment of mild to moderate pain and reduction of fever [F4124]. Acetaminophen _injection_ is indicated for [FDA label]: 鈥?Management of mild to moderate pain 鈥?Management of moderate to severe pain with adjunctive opioid analgesics 鈥?Reduction of fever Due to its low potential to cause allergic reactions, this drug can be administered in patients who are intolerant to salicylates and t…
D-01149	NCc1ccc(cc1)C(=O)O (IUPHAR:4702)|c1c(ccc(c1)CN)C(=O)O (KEGG:D07568)|OC(=O)c1ccc(CN)cc1 (TTD:D0S3VV)	NCc1ccc(cc1)C(=O)O	151.163	1.5438	8	IUPHAR:4702|KEGG:D07568|TTD:D0S3VV	4-AMBA (IUPHAR:4702)|Aminomethylbenzoic acid (KEGG:D07568)		56-91-7 (KEGG:D07568)	B02AA03 (KEGG:D07568)	Synthetic organic (IUPHAR:4702)|Antifibrinolytic, Plasmin inhibitor (KEGG:D07568)
D-01151	O=C(NN)c1ccc(N)cc1 (TTD:D05OZR)	NNC(=O)c1ccc(cc1)N	151.166	1.5447	7	TTD:D05OZR
D-01152	F[C@]1([C@H](N)C1)c1ccccc1 (TTD:D04TZI)	N[C@@H]1C[C@]1(F)c1ccccc1	151.181	2.2827	9	TTD:D04TZI
D-01154	F[C@]1([C@@H](N)C1)c1ccccc1 (TTD:D09HBX)	N[C@H]1C[C@]1(F)c1ccccc1	151.181	2.2827	9	TTD:D09HBX
D-01155	CC(N)CC1=CC=C(O)C=C1 (DrugBank:DB09352)|c1c(ccc(c1)CC(C)N)O.Br (KEGG:D04473)|Br.Oc1ccc(CC(N)C)cc1 (TTD:D0W1RY)	CC(Cc1ccc(cc1)O)N	151.206	1.9822	9	DrugBank:DB09352|KEGG:D04473|TTD:D0W1RY	Hydroxyamphetamine (DrugBank:DB09352)|Hydroxyamphetamine hydrobromide (USP) (KEGG:D04473)|Hydroxyamphetamine Hydrobromide (TTD:D0W1RY)	Approved (DrugBank:DB09352)	103-86-6 (DrugBank:DB09352)|306-21-8 (KEGG:D04473)		Mydriatic agent (eye pupil dilatation) for diagnosis of ophthalmic nerve lesions. (DrugBank:DB09352)|Mydriatic (KEGG:D04473)|Diagnostic evaluation of horner's syndrome (TTD:D0W1RY)
D-01163	[nH]1c([C@@H]2[C@@H](C2)CCN)cnc1 (TTD:D0KK4C)	NCC[C@@H]1C[C@@H]1c1cnc[nH]1	151.209	1.5623	8	TTD:D0KK4C
D-01166	NC12CC3CC(CC(C3)C1)C2 (DrugBank:DB00915)|NC12CC3CC(C2)CC(C1)C3 (IUPHAR:4128)|C12(CC3CC(C1)CC(C2)C3)N.Cl (KEGG:D00777)|C12(CC3CC(C1)CC(C2)C3)N (KEGG:D07441)|NC12CC3CC(C2)CC(C1)C3 (TTD:D02KRS)	NC12CC3CC(C2)CC(C1)C3	151.249	2.6142	10	DrugBank:DB00915|IUPHAR:4128|KEGG:D00777|KEGG:D07441|TTD:D02KRS	Amantadine (DrugBank:DB00915)|amantadine (IUPHAR:4128)|Amantadine hydrochloride (JP17/USP) (KEGG:D00777)|Amantadine (INN) (KEGG:D07441)|Amantadine (TTD:D02KRS)	Approved (DrugBank:DB00915)|Approved (IUPHAR:4128)	768-94-5 (DrugBank:DB00915)|665-66-7 (KEGG:D00777)|768-94-5 (KEGG:D07441)	N04BB01 (DrugBank:DB00915)|N04BB01 (KEGG:D00777)|N04BB01 (KEGG:D07441)	For the chemoprophylaxis, prophylaxis, and treatment of signs and symptoms of infection caused by various strains of influenza A virus. Also for the treatment of parkinsonism and drug-induced extrapyramidal reactions. (DrugBank:DB00915)|Synthetic organic (IUPHAR:4128)|Antiviral, M2 protein inhibitor, Antiparkinsonian, Dopamine secretagogue (KEGG:D00777)|Antiviral, M2 protein inhibitor, Antiparkin…
D-01169	O(c1ccc(cc1)B(O)O)C (TTD:D0A4HS)	COc1ccc(cc1)B(O)O	151.956	-0.625	7	TTD:D0A4HS
D-01171	O(c1c(cccc1)B(O)O)C (TTD:D01FLQ)	COc1ccccc1B(O)O	151.956	-0.625	7	TTD:D01FLQ
D-01173	[nH]1c2c(c(=O)[nH]c1=O)c[nH]n2 (TTD:D08FWK)	O=c1[nH]c(=O)c2c([nH]1)n[nH]c2	152.111	-1.0605	5	TTD:D08FWK	Oxypurinol (TTD:D08FWK)				Heart failure (TTD:D08FWK)
D-01174	O=C1NC2=C(NC=N2)C(=O)N1 (DrugBank:DB02134)|O=c1[nH]c(=O)c2c([nH]1)nc[nH]2 (IUPHAR:4557)|O=c1[nH]c(=O)[nH]c2nc[nH]c12 (TTD:D0M3IN)	O=c1[nH]c(=O)c2c([nH]1)nc[nH]2	152.111	-1.0605	5	DrugBank:DB02134|IUPHAR:4557|TTD:D0M3IN	Xanthine (DrugBank:DB02134)|xanthine (IUPHAR:4557)	Experimental (DrugBank:DB02134)	69-89-6 (DrugBank:DB02134)		Metabolite (IUPHAR:4557)|Apnea (TTD:D0M3IN)
D-01178	NC1=NC2=C(NN=N2)C(O)=N1 (DrugBank:DB01667)	Nc1nc(O)c2c(n1)nn[nH]2	152.114	-0.3831	4	DrugBank:DB01667	8-azaguanine (DrugBank:DB01667)	Experimental (DrugBank:DB01667)	134-58-7 (DrugBank:DB01667)
D-01180	c1(c(cc(cc1)N)O)C(=O)[O-].[Na+].O.O (KEGG:D00875)|[K+].Oc1c(ccc(N)c1)C(=O)[O-] (TTD:D0S2BT)	Nc1ccc(c(c1)O)C(=O)[O-]	152.127	-0.0809	7	KEGG:D00875|TTD:D0S2BT	Aminosalicylate sodium (USP) (KEGG:D00875)|Potassium Aminosalicylate (TTD:D0S2BT)		6018-19-5 (KEGG:D00875)	J04AA01; J04AA02 (KEGG:D00875)	Antibacterial (tuberculostatic) (KEGG:D00875)|Pulmonary tuberculosis (TTD:D0S2BT)
D-01185	COC(=O)C1=CC=C(O)C=C1 (DrugBank:DB14212)|COC(=O)c1ccc(cc1)O (IUPHAR:6273)|c1(C(=O)OC)ccc(cc1)O (KEGG:D01400)|O(C(=O)c1ccc(O)cc1)C (TTD:D0T3NP)	COC(=O)c1ccc(cc1)O	152.147	1.1788	8	DrugBank:DB14212|IUPHAR:6273|KEGG:D01400|TTD:D0T3NP	Methylparaben (DrugBank:DB14212)|methyl p-hydroxybenzoate (IUPHAR:6273)|Methyl parahydroxybenzoate (JP17) (KEGG:D01400)|methyl p-hydroxybenzoate (TTD:D0T3NP)	Approved (DrugBank:DB14212)	99-76-3 (DrugBank:DB14212)|99-76-3 (KEGG:D01400)		Synthetic organic (IUPHAR:6273)|Pharmaceutic aid (antifungal preservative) (KEGG:D01400)
D-01187	O(c1c(cccc1O)C=O)C (TTD:D0C9ZY)	COc1c(C=O)cccc1O	152.147	1.2133	8	TTD:D0C9ZY
D-01189	COC1=CC=C(C=C1)C(O)=O (DrugBank:DB02795)|O(c1ccc(cc1)C(=O)O)C (TTD:D07IRQ)	COc1ccc(cc1)C(=O)O	152.147	1.3934	8	DrugBank:DB02795|TTD:D07IRQ	P-Anisic Acid (DrugBank:DB02795)	Experimental (DrugBank:DB02795)	100-09-4 (DrugBank:DB02795)
D-01206	[I-].Oc1cc([N+](C)(C)C)ccc1 (TTD:D03PQH)	Oc1cccc(c1)[N+](C)(C)C	152.214	1.5889	9	TTD:D03PQH
D-01207	NC(=S)NC1=CC=CC=C1 (DrugBank:DB03694)|S=C(Nc1ccccc1)N (TTD:D02CFH)	NC(=S)Nc1ccccc1	152.217	2.1154	7	DrugBank:DB03694|TTD:D02CFH	N-Phenylthiourea (DrugBank:DB03694)	Experimental (DrugBank:DB03694)
D-01212	[H][C@@]12CC[C@@](C)(C(=O)C1)C2(C)C (DrugBank:DB01744)	O=C1C[C@@H]2C([C@@]1(C)CC2)(C)C	152.233	2.4017	10	DrugBank:DB01744	Camphor (DrugBank:DB01744)	Approved (DrugBank:DB01744)	464-49-3 (DrugBank:DB01744)	C01EB02 (DrugBank:DB01744)
D-01216	C(=C)(C1CC=C(CC1)CO)C (TTD:D0S2HO)	OCC1=CCC(CC1)C(=C)C	152.233	2.2813	10	TTD:D0S2HO	Perillyl alcohol (TTD:D0S2HO)				Cancer (TTD:D0S2HO)
D-01219	N1=C(N)CC[C@@H]2[C@@H]1CCCC2 (TTD:D0K4YY)	NC1=N[C@@H]2[C@@H](CC1)CCCC2	152.237	1.8321	9	TTD:D0K4YY
D-01220	N1=C(N)CC[C@H]2[C@@H]1CCCC2 (TTD:D0R9KX)	NC1=N[C@@H]2[C@H](CC1)CCCC2	152.237	1.8321	9	TTD:D0R9KX
D-01225	Clc1c2[nH]ncc2ccc1 (TTD:D0A6RU)	Clc1cccc2c1[nH]nc2	152.581	2.2163	7	TTD:D0A6RU
D-01231	CP(=O)(C[C@@H](CN)O)O (IUPHAR:1082)|P(=O)(O)(C[C@H](O)CN)C (TTD:D0WZ9T)	CP(=O)(C[C@@H](CN)O)O	153.117	-0.0935	4	IUPHAR:1082|TTD:D0WZ9T	CGP 44532 (IUPHAR:1082)				Synthetic organic (IUPHAR:1082)|Drug abuse (TTD:D0WZ9T)
D-01235	NC1=CC(C(O)=O)=C(O)C=C1 (DrugBank:DB00244)|Nc1ccc(c(c1)C(=O)O)O (IUPHAR:2700)|c1(cc(c(cc1)O)C(=O)O)N (KEGG:D00377)|Oc1c(cc(N)cc1)C(=O)O (TTD:D0C4YC)	Nc1ccc(c(c1)C(=O)O)O	153.135	1.2538	7	DrugBank:DB00244|IUPHAR:2700|KEGG:D00377|TTD:D0C4YC	Mesalazine (DrugBank:DB00244)|mesalazine (IUPHAR:2700)|Mesalamine (USP) (KEGG:D00377)|Mesalazine (TTD:D0C4YC)	Approved (DrugBank:DB00244)|Approved (IUPHAR:2700)	89-57-6 (DrugBank:DB00244)|89-57-6 (KEGG:D00377)	A07EC02 (DrugBank:DB00244)|A07EC02 (KEGG:D00377)	Mesalazine is indicated for the induction of remission in patients with active or mild to moderate acute exacerbations of ulcerative colitis and for the maintenance of remission of ulcerative colitis [FDA Label], [L5101]. Prescribing information for mesalazine in the UK also indicates the medication for the maintenance of remission of Crohn's ileo-colitis [L5101]. (DrugBank:DB00244)|Synthetic org…
D-01236	NC1=CC(O)=C(C=C1)C(O)=O (DrugBank:DB00233)|c1(c(cc(cc1)N)O)C(=O)O (KEGG:D00162)|Oc1c(ccc(N)c1)C(=O)O (TTD:D01WJL)|Oc1c(ccc(N)c1)C(=O)O (TTD:D0Q8UR)	Nc1ccc(c(c1)O)C(=O)O	153.135	1.2538	7	DrugBank:DB00233|KEGG:D00162|TTD:D01WJL|TTD:D0Q8UR	Aminosalicylic Acid (DrugBank:DB00233)|Aminosalicylic acid (USP) (KEGG:D00162)|Aminosalicylic Acid (TTD:D01WJL)|Aminosalicylate Sodium (TTD:D0Q8UR)	Approved (DrugBank:DB00233)	65-49-6 (DrugBank:DB00233)|65-49-6 (KEGG:D00162)	J04AA01; J04AA02; J04AA03 (DrugBank:DB00233)|J04AA01 (KEGG:D00162)	For the treatment of tuberculosis (DrugBank:DB00233)|Antibacterial (tuberculostatic) (KEGG:D00162)|Inflammatory bowel disease (TTD:D01WJL)|Pulmonary and extrapulmonary tuberculosis (TTD:D0Q8UR)
D-01237	NC1=C(O)C=CC=C1C(O)=O (DrugBank:DB03644)	OC(=O)c1cccc(c1N)O	153.135	1.2538	7	DrugBank:DB03644	3-Hydroxyanthranilic Acid (DrugBank:DB03644)	Experimental (DrugBank:DB03644)	548-93-6 (DrugBank:DB03644)
D-01238	ONC(=O)C1=CC=CC=C1O (DrugBank:DB03819)|Oc1c(cccc1)C(=O)NO (TTD:D0H6QL)	ONC(=O)c1ccccc1O	153.135	0.9021	7	DrugBank:DB03819|TTD:D0H6QL	Salicylhydroxamic Acid (DrugBank:DB03819)	Experimental (DrugBank:DB03819)	89-73-6 (DrugBank:DB03819)
D-01245	NCC(c1ccc(cc1)O)O (IUPHAR:2149)|Cl.c1c(ccc(c1)C(CN)O)O (KEGG:D00178)|OC(c1ccc(O)cc1)CN (TTD:D0L9YS)	NCC(c1ccc(cc1)O)O	153.178	1.0846	8	IUPHAR:2149|KEGG:D00178|TTD:D0L9YS	octopamine (IUPHAR:2149)|Octopamine hydrochloride (JAN) (KEGG:D00178)|Octopamine (TTD:D0L9YS)		770-05-8 (KEGG:D00178)	C01CA18 (KEGG:D00178)	Metabolite (IUPHAR:2149)|Antihypotensive (KEGG:D00178)|Thromboembolic disorders (TTD:D0L9YS)
D-01247	NCCC1=CC(O)=C(O)C=C1 (DrugBank:DB00988)|NCCc1ccc(c(c1)O)O (IUPHAR:940)|c1(cc(c(cc1)O)O)CCN.Cl (KEGG:D00633)|c1(cc(c(cc1)O)O)CCN (KEGG:D07870)|Oc1cc(CCN)ccc1O (TTD:D0T7OW)	NCCc1ccc(c(c1)O)O	153.178	1.2993	8	DrugBank:DB00988|IUPHAR:940|KEGG:D00633|KEGG:D07870|TTD:D0T7OW	Dopamine (DrugBank:DB00988)|dopamine (IUPHAR:940)|Dopamine hydrochloride (JP17/USP) (KEGG:D00633)|Dopamine (INN) (KEGG:D07870)|Dopamine (TTD:D0T7OW)	Approved (DrugBank:DB00988)|Approved (IUPHAR:940)	51-61-6 (DrugBank:DB00988)|62-31-7 (KEGG:D00633)|51-61-6 (KEGG:D07870)	C01CA04 (DrugBank:DB00988)|C01CA04 (KEGG:D00633)|C01CA04 (KEGG:D07870)	For the correction of hemodynamic imbalances present in the shock syndrome due to myocardial infarction, trauma, endotoxic septicemia, open-heart surgery, renal failure, and chronic cardiac decompensation as in congestive failure (DrugBank:DB00988)|Metabolite (IUPHAR:940)|Cardiotonic, Dopamine receptor agonist (KEGG:D00633)|Cardiotonic, Dopamine receptor agonist (KEGG:D07870)|Hypotension; Parkins…
D-01249	CC(=O)NCCC1=CN=CN1 (DrugBank:DB04622)	CC(=O)NCCc1cnc[nH]1	153.182	0.4792	7	DrugBank:DB04622	N-ACETYLHISTAMINE (DrugBank:DB04622)	Experimental (DrugBank:DB04622)
D-01252	NCCCCCc1cnc[nH]1 (IUPHAR:1252)|[nH]1c(CCCCCN)cnc1 (TTD:D0E5EB)	NCCCCCc1cnc[nH]1	153.225	1.7815	8	IUPHAR:1252|TTD:D0E5EB	impentamine (IUPHAR:1252)|impentamine (TTD:D0E5EB)				Synthetic organic (IUPHAR:1252)
D-01256	O1C(O)C2=CC(=O)OC2=CC1 (TTD:D0LB4A)	O=C1OC2=CCOC(C2=C1)O	154.12	-0.2979	7	TTD:D0LB4A
D-01257	OC(=O)C1=CC=C(O)C(O)=C1 (DrugBank:DB03946)	OC(=O)c1ccc(c(c1)O)O	154.12	0.796	7	DrugBank:DB03946	3,4-Dihydroxybenzoic Acid (DrugBank:DB03946)	Experimental (DrugBank:DB03946)	99-50-3 (DrugBank:DB03946)
D-01259	Oc1cc(O)cc(c1)C(=O)O (IUPHAR:5783)|Oc1cc(cc(O)c1)C(=O)O (TTD:D0W1OR)	Oc1cc(O)cc(c1)C(=O)O	154.12	0.796	7	IUPHAR:5783|TTD:D0W1OR	3,5-dihydroxybenzoic acid (IUPHAR:5783)|3,5-dihydroxybenzoic acid (TTD:D0W1OR)				Synthetic organic (IUPHAR:5783)
D-01260	OC(=O)C1=CC=C(O)C=C1O (DrugBank:DB02839)	Oc1ccc(c(c1)O)C(=O)O	154.12	0.796	7	DrugBank:DB02839	2,4-Dihydroxybenzoic Acid (DrugBank:DB02839)	Experimental (DrugBank:DB02839)	89-86-1 (DrugBank:DB02839)
D-01261	CC1=[N+]([O-])C=C(N=C1)C(O)=O (DrugBank:DB09055)|[O-][n+]1cc(ncc1C)C(=O)O (IUPHAR:1596)|c1(c[n+](c(cn1)C)[O-])C(=O)O (KEGG:D07190)|[O-][n+]1c(cnc(c1)C(=O)O)C (TTD:D0S1NZ)	Cc1cnc(cn1=O)C(=O)O	154.123	0.5167	6	DrugBank:DB09055|IUPHAR:1596|KEGG:D07190|TTD:D0S1NZ	Acipimox (DrugBank:DB09055)|acipimox (IUPHAR:1596)|Acipimox (INN/BAN) (KEGG:D07190)|Acipimox (TTD:D0S1NZ)	Approved; Investigational (DrugBank:DB09055)|Approved (IUPHAR:1596)	51037-30-0 (DrugBank:DB09055)|51037-30-0 (KEGG:D07190)	C10AD06 (DrugBank:DB09055)|C10AD06 (KEGG:D07190)	Used in the treatment of hyperlipidemias (abnormally elevated levels of any or all lipids and/or lipoproteins in the blood). (DrugBank:DB09055)|Synthetic organic (IUPHAR:1596)|Antihyperlipidemic (KEGG:D07190)|Atherosclerosis (TTD:D0S1NZ)
D-01266	OC(=O)c1n[nH]c(C(C)C)c1 (TTD:D0IC7C)	CC(c1[nH]nc(c1)C(=O)O)C	154.166	1.2313	7	TTD:D0IC7C
D-01267	OC(=O)c1n[nH]c(CCC)c1 (TTD:D0U6SQ)	CCCc1cc(n[nH]1)C(=O)O	154.166	1.0604	7	TTD:D0U6SQ
D-01273	CCCCCC(=O)/C=C/C=O (IUPHAR:6283)|O=C(CCCCC)/C=C/C=O (TTD:D05DTN)	CCCCCC(=O)/C=C/C=O	154.206	1.8909	9	IUPHAR:6283|TTD:D05DTN	4-oxo-nonenal (IUPHAR:6283)|4-oxo-nonenal (TTD:D05DTN)				Metabolite (IUPHAR:6283)
D-01275	CO/N=C/C1=CCCN(C1)C (IUPHAR:301)|N1(CCC=C(C1)/C=N/OC)C.Cl (KEGG:D05035)|O(/N=C/C1=CCCN(C1)C)C (TTD:D0UX0T)	CO/N=C/C1=CCCN(C1)C	154.21	0.8184	8	IUPHAR:301|KEGG:D05035|TTD:D0UX0T	milameline (IUPHAR:301)|Milameline hydrochloride (USAN) (KEGG:D05035)|Milameline (TTD:D0UX0T)		139886-04-7 (KEGG:D05035)		Synthetic organic (IUPHAR:301)|Dementia therapeutic agent, Muscarinic acetylcholine receptor partial agonist (KEGG:D05035)|Cognitive disorders (TTD:D0UX0T)
D-01277	Cc1ccc(o1)C[N+](C)(C)C (IUPHAR:300)|o1c(C[N+](C)(C)C)ccc1C (TTD:D0WO3A)	Cc1ccc(o1)C[N+](C)(C)C	154.229	1.7942	9	IUPHAR:300|TTD:D0WO3A	methylfurmethide (IUPHAR:300)|methylfurmethide (TTD:D0WO3A)				Synthetic organic (IUPHAR:300)
D-01278	SCc1ccc(OC)cc1 (TTD:D08PIF)	SCc1ccc(cc1)OC	154.229	2.125	8	TTD:D08PIF
D-01286	CC(C)=CCC\C(C)=C\CO (DrugBank:DB14183)|OC/C=C(/CCC=C(C)C)\C (IUPHAR:2467)|OC/C=C(/CCC=C(C)C)\C (TTD:D0Q4GB)	OC/C=C(/CCC=C(C)C)\C	154.249	2.6714	10	DrugBank:DB14183|IUPHAR:2467|TTD:D0Q4GB	Geraniol (DrugBank:DB14183)|geraniol (IUPHAR:2467)	Approved; Experimental (DrugBank:DB14183)	106-24-1 (DrugBank:DB14183)		Geraniol is approved for use within allergenic epicutaneous patch tests which are indicated for use as an aid in the diagnosis of allergic contact dermatitis (ACD) in persons 6 years of age and older. (DrugBank:DB14183)|Natural product (IUPHAR:2467)
D-01295	ClCC(=O)c1ccccc1 (IUPHAR:6285)|ClCC(=O)c1ccccc1 (TTD:D0G4GB)	ClCC(=O)c1ccccc1	154.594	2.1081	8	IUPHAR:6285|TTD:D0G4GB	omega-chloroacetophenone (IUPHAR:6285)|omega-chloroacetophenone (TTD:D0G4GB)				Synthetic organic (IUPHAR:6285)
D-01296	ONC(=O)CP(O)(O)=O (DrugBank:DB03645)	ONC(=O)CP(=O)(O)O	155.047	-0.9396	2	DrugBank:DB03645	Phosphonoacetohydroxamic Acid (DrugBank:DB03645)	Experimental (DrugBank:DB03645)
D-01304	N[C@H](C(=O)O)Cc1c[nH]cn1 (IUPHAR:3310)|N[C@H](C(=O)O)Cc1c[nH]cn1 (IUPHAR:4670)|c1nc(c[nH]1)C[C@@H](C(=O)O)N (KEGG:D00032)|Cl.O.C(=O)([C@H](Cc1c[nH]cn1)N)O (KEGG:D02072)	N[C@H](C(=O)O)Cc1c[nH]cn1	155.155	0.0644	6	IUPHAR:3310|IUPHAR:4670|KEGG:D00032|KEGG:D02072	L-histidine (IUPHAR:3310)|[<sup>3</sup>H]histidine (IUPHAR:4670)|Histidine (USP/INN) (KEGG:D00032)|L-Histidine hydrochloride hydrate (JP17) (KEGG:D02072)	Labelled; Radioactive (IUPHAR:4670)	71-00-1 (KEGG:D00032)|5934-29-2 (KEGG:D02072)		Metabolite (IUPHAR:3310)|Metabolite (IUPHAR:4670)|Pharmaceutic aid (buffering agent, stabilizing) (KEGG:D00032)|Pharmaceutic aid (stabilizing) (KEGG:D02072)
D-01308	COC(=O)C1=CCCN(C)C1 (DrugBank:DB04365)|COC(=O)C1=CCCN(C1)C (IUPHAR:296)|O(C(=O)C1=CCCN(C1)C)C (TTD:D07EFM)	COC(=O)C1=CCCN(C1)C	155.194	0.3592	8	DrugBank:DB04365|IUPHAR:296|TTD:D07EFM	Arecoline (DrugBank:DB04365)|arecoline (IUPHAR:296)	Experimental (DrugBank:DB04365)	63-75-2 (DrugBank:DB04365)		Natural product (IUPHAR:296)|Parkinson's disease (TTD:D07EFM)
D-01314	N1=C(N)CCCCC1CCN (TTD:D0IR4Y)	NCCC1CCCCC(=N1)N	155.241	1.4712	8	TTD:D0IR4Y
D-01323	n1(c2c(c(c1)C#N)cccc2)C (TTD:D06FSR)	N#Cc1cn(c2c1cccc2)C	156.184	2.04998	10	TTD:D06FSR
D-01324	[Ru+3].[N-]1C=CN=C1.C1=CC=C(N=C1)C1=CC=CC=N1.C1=CC=C(N=C1)C1=CC=CC=N1 (DrugBank:DB03871)	c1ccc(nc1)c1ccccn1	156.184	2.1436	10	DrugBank:DB03871	lambda-bis(2,2'-bipyridine)imidazole ruthenium (II) (DrugBank:DB03871)	Experimental (DrugBank:DB03871)
D-01331	C1(C(CC(CC1)C)O)C(C)C (KEGG:D04849)|C1(C(CC(CC1)C)O)C(C)C (KEGG:D04918)	CC1CCC(C(C1)O)C(C)C	156.265	2.4395	10	KEGG:D04849|KEGG:D04918	dl-Menthol (JP17) (KEGG:D04849)|Menthol (USP) (KEGG:D04918)		89-78-1 (KEGG:D04849)|1490-04-6 (KEGG:D04918)		Pharmaceutic aid (flavor) (KEGG:D04849)|Antipruritic (topical) (KEGG:D04918)
D-01335	CC1=CC(O)=CC(C)=C1Cl (DrugBank:DB11121)|c1c(c(c(cc1O)C)Cl)C (KEGG:D03473)	Oc1cc(C)c(c(c1)C)Cl	156.609	2.6624	8	DrugBank:DB11121|KEGG:D03473	Chloroxylenol (DrugBank:DB11121)|Chloroxylenol (USP/INN) (KEGG:D03473)	Approved (DrugBank:DB11121)	88-04-0 (DrugBank:DB11121)|88-04-0 (KEGG:D03473)	D08AE05 (DrugBank:DB11121)|D08AE05 (KEGG:D03473)	The predominant medical applications for which chloroxylenol is formally indicated for therapeutic use is as an application to the skin for use in cuts, bites, stings, abrasions, and for use as antiseptic hand cleaner [L1992]. (DrugBank:DB11121)|Antibacterial, Antiseptic (KEGG:D03473)
D-01344	S(=O)(=O)(N)c1ccccc1 (TTD:D09QHC)	NS(=O)(=O)c1ccccc1	157.19	2.1151	6	TTD:D09QHC
D-01353	O1CC(N=C(N)CC1)CCN (TTD:D07MFH)	NCCC1COCCC(=N1)N	157.213	0.3175	7	TTD:D07MFH
D-01357	NCCc1sc(nc1C)N (IUPHAR:4025)|s1c(CCN)c(nc1N)C (TTD:D0I5CT)	NCCc1sc(nc1C)N	157.237	1.8164	6	IUPHAR:4025|TTD:D0I5CT	amthamine (IUPHAR:4025)				Synthetic organic (IUPHAR:4025)
D-01360	P(=O)(O)(O)c1ccccc1 (TTD:D00CIW)	OP(=O)(c1ccccc1)O	158.092	0.4896	6	TTD:D00CIW
D-01363	OC(=O)C(c1o[nH]c(=O)c1)N (IUPHAR:1371)|o1[nH]c(=O)cc1C(N)C(=O)O (TTD:D01YEN)	OC(=O)C(c1o[nH]c(=O)c1)N	158.112	-0.2474	5	IUPHAR:1371|TTD:D01YEN	ibotenic acid (IUPHAR:1371)|ibotenate (TTD:D01YEN)				Natural product (IUPHAR:1371)
D-01367	O=C1c2c(C(=O)C=C1)cccc2 (TTD:D09LVO)|O=C1c2c(C(=O)C=C1)cccc2 (TTD:D0DQ6Z)	O=C1C=CC(=O)c2c1cccc2	158.153	1.6218	10	TTD:D09LVO|TTD:D0DQ6Z
D-01368	O=C1c2c(C=CC1=O)cccc2 (TTD:D0W9VA)	O=C1C=Cc2c(C1=O)cccc2	158.153	1.4652	10	TTD:D0W9VA
D-01370	C(N1C=CN=C1)C1=CC=CC=C1 (DrugBank:DB04581)|n1(Cc2ccccc2)ccnc1 (TTD:D0X0IH)	c1ccc(cc1)Cn1cncc1	158.2	1.9314	10	DrugBank:DB04581|TTD:D0X0IH	1-benzylimidazole (DrugBank:DB04581)	Experimental (DrugBank:DB04581)	4238-71-5 (DrugBank:DB04581)
D-01373	S1CC(N=C(N)CC1)CC (TTD:D09NRX)	CCC1CSCCC(=N1)N	158.264	1.395	7	TTD:D09NRX
D-01374	S1CC(N=C1N)CCCC (TTD:D07OQX)	CCCCC1CSC(=N1)N	158.264	1.7426	7	TTD:D07OQX
D-01375	Cl[C@@H]1[C@H]2[C@@H]1N=C(N)C[C@@H]2C (TTD:D0R5XK)	C[C@H]1CC(=N[C@H]2[C@@H]1[C@H]2Cl)N	158.629	1.1251	7	TTD:D0R5XK					Septic shock (TTD:D0R5XK)
D-01376	Clc1ccc(CS)cc1 (TTD:D09ZJW)	SCc1ccc(cc1)Cl	158.648	2.7698	7	TTD:D09ZJW
D-01377	Clc1c(CS)cccc1 (TTD:D0P3XW)	SCc1ccccc1Cl	158.648	2.7698	7	TTD:D0P3XW
D-01378	N[C@@H]([C@H]1C[C@@H]1C(=O)O)C(=O)O (IUPHAR:1368)|OC(=O)[C@@H]1[C@H](C1)[C@H](N)C(=O)O (TTD:D0Z7CZ)	N[C@@H]([C@H]1C[C@@H]1C(=O)O)C(=O)O	159.14	-0.1807	6	IUPHAR:1368|TTD:D0Z7CZ	L-CCG-I (IUPHAR:1368)|L-CCG-I (TTD:D0Z7CZ)				Synthetic organic (IUPHAR:1368)
D-01379	[O-]C(=O)[C@@H](C[C@@H](C(=O)[O-])N)C (IUPHAR:4075)|[O-]C(=O)[C@@H](C[C@@H](C(=O)[O-])N)C (IUPHAR:4317)|[O-]C(=O)[C@@H](C[C@H](N)C(=O)[O-])C (TTD:D0I0ZK)|[O-]C(=O)[C@@H](C[C@H](N)C(=O)[O-])C (TTD:D0S8AN)	[O-]C(=O)[C@@H](C[C@@H](C(=O)[O-])N)C	159.14	-2.46	6	IUPHAR:4075|IUPHAR:4317|TTD:D0I0ZK|TTD:D0S8AN	[<sup>3</sup>H]SYM2081 (IUPHAR:4075)|SYM2081 (IUPHAR:4317)|[3H](2S,4R)-4-methylglutamate (TTD:D0I0ZK)|SYM2081 (TTD:D0S8AN)	Labelled; Radioactive (IUPHAR:4075)			Synthetic organic (IUPHAR:4075)|Synthetic organic (IUPHAR:4317)
D-01383	CN1C(=O)C=CC2=CC=CC=C12 (DrugBank:DB04580)	Cn1c(=O)ccc2c1cccc2	159.185	1.5385	10	DrugBank:DB04580	1-Methyl-2-quinolone (DrugBank:DB04580)	Experimental (DrugBank:DB04580)	606-43-9 (DrugBank:DB04580)
D-01387	O=Cc1c2c(n(c1)C)cccc2 (TTD:D0D1KZ)	O=Cc1cn(c2c1cccc2)C	159.185	1.9908	10	TTD:D0D1KZ
D-01388	Oc1c2c(c(N)cc1)cccc2 (TTD:D08XXD)	Oc1ccc(c2c1cccc2)N	159.185	2.7088	10	TTD:D08XXD
D-01390	[nH]1c(Cc2cccnc2)cnc1 (TTD:D0S0HT)	c1ccc(cn1)Cc1cnc[nH]1	159.188	1.3955	9	TTD:D0S0HT
D-01391	[nH]1c(Cc2ncccc2)cnc1 (TTD:D0W7OR)	c1ccc(nc1)Cc1cnc[nH]1	159.188	1.3955	9	TTD:D0W7OR
D-01393	[nH]1c(Cc2ccncc2)cnc1 (TTD:D09WQL)	n1ccc(cc1)Cc1cnc[nH]1	159.188	1.3955	9	TTD:D09WQL
D-01398	CN(CC#C)CC1=CC=CC=C1 (DrugBank:DB01626)|CN(Cc1ccccc1)CC#C (IUPHAR:7262)|c1(CN(CC#C)C)ccccc1.Cl (KEGG:D02564)|c1(CN(CC#C)C)ccccc1 (KEGG:D08453)|N(Cc1ccccc1)(CC#C)C (TTD:D0R0UJ)	CN(Cc1ccccc1)CC#C	159.228	1.7516	11	DrugBank:DB01626|IUPHAR:7262|KEGG:D02564|KEGG:D08453|TTD:D0R0UJ	Pargyline (DrugBank:DB01626)|pargyline (IUPHAR:7262)|Pargyline hydrochloride (USAN) (KEGG:D02564)|Pargyline (INN) (KEGG:D08453)|Pargyline (TTD:D0R0UJ)	Approved (DrugBank:DB01626)|Approved (IUPHAR:7262)	555-57-7 (DrugBank:DB01626)|306-07-0 (KEGG:D02564)|555-57-7 (KEGG:D08453)	C02KC01; C02LL01 (DrugBank:DB01626)|C02KC01 (KEGG:D02564)|C02KC01 (KEGG:D08453)	For the treatment of moderate to severe hypertension. (DrugBank:DB01626)|Synthetic organic (IUPHAR:7262)|Antidepressant, Antihypertensive, Monoamine oxidase (MAO) inhibitor (KEGG:D02564)|Antidepressant, Antihypertensive, Monoamine oxidase (MAO) inhibitor (KEGG:D08453)|Moderate to severe hypertension (TTD:D0R0UJ)
D-01399	N1CCC(=CC1)c1ccccc1 (TTD:D07AAZ)	N1CCC(=CC1)c1ccccc1	159.228	2.3921	11	TTD:D07AAZ
D-01409	Oc1c2c(cc(O)c1)cccc2 (TTD:D04PMX)	Oc1cc2ccccc2c(c1)O	160.169	2.251	10	TTD:D04PMX
D-01410	Oc1c2c(c(O)cc1)cccc2 (TTD:D09BVH)	Oc1ccc(c2c1cccc2)O	160.169	2.251	10	TTD:D09BVH
D-01412	OC1=CC=C2C=CC=CC2=C1O (DrugBank:DB07610)	Oc1ccc2c(c1O)cccc2	160.169	2.251	10	DrugBank:DB07610	NAPHTHALENE-1,2-DIOL (DrugBank:DB07610)	Experimental (DrugBank:DB07610)
D-01413	CN(NC(=O)CCC(=O)O)C (IUPHAR:7025)|O=C(NN(C)C)CCC(=O)O (TTD:D0B2WZ)	CN(NC(=O)CCC(=O)O)C	160.171	-0.1651	6	IUPHAR:7025|TTD:D0B2WZ	daminozide (IUPHAR:7025)|daminozide (TTD:D0B2WZ)				Synthetic organic (IUPHAR:7025)
D-01416	N[C@H](C(=O)O)/C=C/OCCN (IUPHAR:8860)	N[C@H](C(=O)O)/C=C/OCCN	160.171	0.2879	6	IUPHAR:8860	aminoethoxyvinylglycine (IUPHAR:8860)				Synthetic organic (IUPHAR:8860)
D-01418	Oc1c2ncccc2c(N)cc1 (TTD:D0W3ON)	Nc1ccc(c2c1cccn2)O	160.173	2.1038	9	TTD:D0W3ON
D-01419	O=c1[nH]ccc2c1cccc2N (TTD:D07WPL)	Nc1cccc2c1cc[nH]c2=O	160.173	1.6915	9	TTD:D07WPL
D-01425	NNC1=NN=CC2=CC=CC=C12 (DrugBank:DB01275)|c1ccc2c(c1)c(nnc2)NN.Cl (KEGG:D01302)|N(N)c1nncc2c1cccc2 (TTD:D0K1XK)	NNc1nncc2c1cccc2	160.176	1.6887	8	DrugBank:DB01275|KEGG:D01302|TTD:D0K1XK	Hydralazine (DrugBank:DB01275)|Hydralazine hydrochloride (JP17/USP) (KEGG:D01302)|Hydralazine (TTD:D0K1XK)	Approved (DrugBank:DB01275)	86-54-4 (DrugBank:DB01275)|304-20-1 (KEGG:D01302)	C02DB02; C02LG02 (DrugBank:DB01275)|C02DB02 (KEGG:D01302)	For the treatment of essential hypertension, alone or as an adjunct. Also for the management of severe hypertension when the drug cannot be given orally or when blood pressure must be lowered immediately, congestive heart failure (in combination with cardiac glycosides and diuretics and/or with isosorbide dinitrate), and hypertension secondary to pre-eclampsia/eclampsia. (DrugBank:DB01275)|Antihy…
D-01427	CCCCCCC(C(=O)O)O (IUPHAR:5796)|OC(CCCCCC)C(=O)O (TTD:D0Q3QI)	CCCCCCC(C(=O)O)O	160.211	1.4023	8	IUPHAR:5796|TTD:D0Q3QI	2-hydroxyoctanoic acid (IUPHAR:5796)				Metabolite (IUPHAR:5796)
D-01429	CCCCC[C@@H](CC(=O)O)O (IUPHAR:2933)|O[C@@H](CCCCC)CC(=O)O (TTD:D00FTQ)	CCCCC[C@@H](CC(=O)O)O	160.211	1.4023	8	IUPHAR:2933|TTD:D00FTQ	3-hydroxyoctanoic acid (IUPHAR:2933)|3-hydroxyoctanoic acid (TTD:D00FTQ)				Metabolite (IUPHAR:2933)
D-01431	C(=O)(C[C@H](C[N+](C)(C)C)N)[O-] (TTD:D0P9JW)	N[C@@H](C[N+](C)(C)C)CC(=O)[O-]	160.214	-1.1398	7	TTD:D0P9JW	Emeriamine (TTD:D0P9JW)				Diabetes (TTD:D0P9JW)
D-01434	NCCC1=CNC2=CC=CC=C12 (DrugBank:DB08653)|NCCc1c[nH]c2c1cccc2 (IUPHAR:125)|[nH]1c2c(c(CCN)c1)cccc2 (TTD:D08CJK)	NCCc1c[nH]c2c1cccc2	160.216	2.3694	10	DrugBank:DB08653|IUPHAR:125|TTD:D08CJK	2-(1H-INDOL-3-YL)ETHANAMINE (DrugBank:DB08653)|tryptamine (IUPHAR:125)	Experimental (DrugBank:DB08653)			Metabolite (IUPHAR:125)
D-01435	C(C1=NCCN1)C1=CC=CC=C1 (DrugBank:DB00797)|c1ccc(cc1)CC1=NCCN1 (IUPHAR:7310)|Cl.c1ccccc1CC1=NCCN1 (KEGG:D00997)|c1ccccc1CC1=NCCN1 (KEGG:D08614)|N1C(=NCC1)Cc1ccccc1 (TTD:D03RZV)	c1ccc(cc1)CC1=NCCN1	160.216	0.9952	10	DrugBank:DB00797|IUPHAR:7310|KEGG:D00997|KEGG:D08614|TTD:D03RZV	Tolazoline (DrugBank:DB00797)|tolazoline (IUPHAR:7310)|Tolazoline hydrochloride (JAN/USP) (KEGG:D00997)|Tolazoline (INN) (KEGG:D08614)|Tolazoline (TTD:D03RZV)	Approved; Vet_approved (DrugBank:DB00797)|Approved; Withdrawn (IUPHAR:7310)	59-98-3 (DrugBank:DB00797)|59-97-2 (KEGG:D00997)|59-98-3 (KEGG:D08614)	C04AB02; M02AX02 (DrugBank:DB00797)|C04AB02; M02AX02 (KEGG:D00997)|C04AB02; M02AX02 (KEGG:D08614)	For the treatment of pulmonary artery anomalies (DrugBank:DB00797)|Synthetic organic (IUPHAR:7310)|Vasodilator (peripheral), alpha-Adrenergic receptor antagonist (KEGG:D00997)|Vasodilator (peripheral), alpha-Adrenergic receptor antagonist (KEGG:D08614)|Peripheral vasoconstriction; Pulmonary hypertension (TTD:D03RZV)
D-01436	CC(C[N+](C)(C)C)OC(C)=O (DrugBank:DB06709)|CC(C[N+](C)(C)C)OC(=O)C (IUPHAR:7438)|[N+](CC(OC(=O)C)C)(C)(C)C.[Cl-] (KEGG:D04970)|O(C(C[N+](C)(C)C)C)C(=O)C (TTD:D04MWJ)|O(C(C[N+](C)(C)C)C)C(=O)C (TTD:D0S8IQ)	CC(C[N+](C)(C)C)OC(=O)C	160.234	0.6442	8	DrugBank:DB06709|IUPHAR:7438|KEGG:D04970|TTD:D04MWJ|TTD:D0S8IQ	Methacholine (DrugBank:DB06709)|methacholine (IUPHAR:7438)|Methacholine chloride (JAN/USAN/INN) (KEGG:D04970)|Methacholine Chloride (TTD:D04MWJ)	Approved; Investigational (DrugBank:DB06709)|Approved (IUPHAR:7438)	55-92-5 (DrugBank:DB06709)|62-51-1 (KEGG:D04970)		It is most commonly used for diagnosing bronchial hyperreactivity, using the bronchial challenge test. (DrugBank:DB06709)|Synthetic organic (IUPHAR:7438)|Diagnostic, Muscarinic acetylcholine receptor agonist (KEGG:D04970)|Diagnosing bronchial hyperreactivity (TTD:D04MWJ)|Asthma (TTD:D0S8IQ)
D-01438	S1CC(N=C(N)CC1)CO (TTD:D01XOR)	OCC1CSCCC(=N1)N	160.237	-0.0227	6	TTD:D01XOR
D-01444	OC(=O)[C@@H](C[C@H](N)C(=O)O)C (TTD:D0B2VW)	OC(=O)[C@@H](C[C@@H](C(=O)O)N)C	161.156	0.2094	6	TTD:D0B2VW
D-01445	O=C1c2c(N(C1=O)C)cccc2 (TTD:D0U3JD)	O=C1c2ccccc2N(C1=O)C	161.157	0.9107	9	TTD:D0U3JD
D-01446	o1c2c(c(N)cc1=O)cccc2 (TTD:D0B4GV)	O=c1cc(N)c2c(o1)cccc2	161.157	1.9564	9	TTD:D0B4GV
D-01448	NC1=NC2=CC=CC=C2C(=O)N1 (DrugBank:DB03780)	Nc1nc2ccccc2c(=O)[nH]1	161.161	1.0865	8	DrugBank:DB03780	2-Aminoquinazolin-4(3h)-One (DrugBank:DB03780)	Experimental (DrugBank:DB03780)
D-01453	CC1=CC=CC2=C1CCNC2=O (DrugBank:DB03722)|O=C1NCCc2c1cccc2C (TTD:D0E2VC)|O=C1NCCc2c1cccc2C (TTD:D0M3LU)	O=C1NCCc2c1cccc2C	161.2	1.6097	10	DrugBank:DB03722|TTD:D0E2VC|TTD:D0M3LU	3,4-Dihydro-5-Methyl-Isoquinolinone (DrugBank:DB03722)	Experimental (DrugBank:DB03722)
D-01454	CC(C[N+](C)(C)C)OC(N)=O (DrugBank:DB01019)|CC(C[N+](C)(C)C)OC(=O)N (IUPHAR:297)|[N+](CC(OC(=O)N)C)(C)(C)C.[Cl-] (KEGG:D01000)|O(C(C[N+](C)(C)C)C)C(=O)N (TTD:D07ZTO)	CC(C[N+](C)(C)C)OC(=O)N	161.222	0.8767	7	DrugBank:DB01019|IUPHAR:297|KEGG:D01000|TTD:D07ZTO	Bethanechol (DrugBank:DB01019)|bethanechol (IUPHAR:297)|Bethanechol chloride (JP17/USP) (KEGG:D01000)|Bethanechol (TTD:D07ZTO)	Approved (DrugBank:DB01019)|Approved (IUPHAR:297)	674-38-4 (DrugBank:DB01019)|590-63-6 (KEGG:D01000)	N07AB02 (DrugBank:DB01019)|N07AB02 (KEGG:D01000)	For the treatment of acute postoperative and postpartum nonobstructive (functional) urinary retention and for neurogenic atony of the urinary bladder with retention. (DrugBank:DB01019)|Synthetic organic (IUPHAR:297)|Prokinetic, Muscarinic acetylcholine receptor agonist (KEGG:D01000)|Urinary retention (TTD:D07ZTO)
D-01456	NC(=N)SCCN=C(N)N (IUPHAR:1274)|S(CCN=C(N)N)C(=N)N (TTD:D0MP8E)	NC(=N)SCCN=C(N)N	161.229	1.0871	4	IUPHAR:1274|TTD:D0MP8E	VUF 8430 (IUPHAR:1274)|VUF 8430 (TTD:D0MP8E)				Synthetic organic (IUPHAR:1274)
D-01462	CN(CCCSC(=N)N)C (IUPHAR:1248)|S(CCCN(C)C)C(=N)N (TTD:D0O3NG)	CN(CCCSC(=N)N)C	161.268	1.3648	6	IUPHAR:1248|TTD:D0O3NG	dimaprit (IUPHAR:1248)				Synthetic organic (IUPHAR:1248)
D-01464	CC1=C(CCCl)SC=N1 (DrugBank:DB06470)|c1(c(ncs1)C)CCCl (KEGG:D07330)|ClCCc1scnc1C (TTD:D0G3LM)	Cc1ncsc1CCCl	161.652	2.2328	6	DrugBank:DB06470|KEGG:D07330|TTD:D0G3LM	Clomethiazole (DrugBank:DB06470)|Clomethiazole (INN) (KEGG:D07330)	Investigational (DrugBank:DB06470)	533-45-9 (KEGG:D07330)	N05CM02; N05CX04 (DrugBank:DB06470)|N05CM02 (KEGG:D07330)	Investigated for use/treatment in strokes. (DrugBank:DB06470)|Sedative-hypnotic (KEGG:D07330)|Stroke (TTD:D0G3LM)
D-01465	o1c2c(cc1B(O)O)cccc2 (TTD:D00NXA)	OB(c1cc2c(o1)cccc2)O	161.95	0.1126	8	TTD:D00NXA
D-01466	OB(O)/C=C/Cc1ccccc1 (TTD:D04RCR)	OB(/C=C/Cc1ccccc1)O	161.993	0.7973	9	TTD:D04RCR
D-01471	CC(O)(CC(O)=O)CC(O)=O (DrugBank:DB04377)|OC(=O)CC(CC(=O)O)(O)C (IUPHAR:2960)|OC(=O)CC(CC(=O)O)(C)O (KEGG:D04897)|OC(CC(=O)O)(CC(=O)O)C (TTD:D0G4BR)|OC(CC(=O)O)(CC(=O)O)C (TTD:D0IJ7H)	OC(=O)CC(CC(=O)O)(O)C	162.141	-0.3132	6	DrugBank:DB04377|IUPHAR:2960|KEGG:D04897|TTD:D0G4BR|TTD:D0IJ7H	Meglutol (DrugBank:DB04377)|meglutol (IUPHAR:2960)|Meglutol (USAN/INN) (KEGG:D04897)	Experimental (DrugBank:DB04377)	503-49-1 (DrugBank:DB04377)|503-49-1 (KEGG:D04897)	C10AX05 (DrugBank:DB04377)|C10AX05 (KEGG:D04897)	Synthetic organic (IUPHAR:2960)|Antihyperlipidemic (KEGG:D04897)
D-01473	OC1=CC(=O)OC2=CC=CC=C12 (DrugBank:DB03410)	O=c1cc(O)c2c(o1)cccc2	162.142	1.4986	9	DrugBank:DB03410	4-hydroxycoumarin (DrugBank:DB03410)	Experimental (DrugBank:DB03410)	1076-38-6 (DrugBank:DB03410)
D-01474	o1c2c(ccc(O)c2)ccc1=O (TTD:D02JEZ)|o1c2c(ccc(O)c2)ccc1=O (TTD:D04QCJ)	Oc1ccc2c(c1)oc(=O)cc2	162.142	1.4986	9	TTD:D02JEZ|TTD:D04QCJ
D-01476	C1(=CC(=O)[N-]S(=O)(=O)O1)C.[K+] (KEGG:D08836)	O=C1C=C(C)OS(=O)(=O)[N-]1	162.144	0.4768	4	KEGG:D08836	Acesulfame potassium (NF) (KEGG:D08836)		55589-62-3 (KEGG:D08836)		Pharmaceutic aid (sweetener) (KEGG:D08836)
D-01478	O=c1[nH]c(=O)[nH]c2c1cccc2 (TTD:D06XVV)	O=c1[nH]c2ccccc2c(=O)[nH]1	162.145	0.2164	8	TTD:D06XVV
D-01487	O=C1NN(CC1)c1ccccc1 (TTD:D0P1LP)	O=C1CCN(N1)c1ccccc1	162.189	1.3217	9	TTD:D0P1LP
D-01488	O=C1NCCc2c1cccc2N (TTD:D05RXG)	O=C1NCCc2c1cccc2N	162.189	1.4647	9	TTD:D05RXG
D-01494	n1c(cc(cc1N)C)C=C(C)C (TTD:D06JZQ)	CC(=Cc1cc(C)cc(n1)N)C	162.232	2.9766	10	TTD:D06JZQ
D-01496	CN1CCCC1c1cccnc1 (IUPHAR:3978)|N1(C(CCC1)c1cccnc1)C (TTD:D02BPT)|OC(C(O)C(=O)O)C(=O)O.N1(C(CCC1)c1cccnc1)C (TTD:D0T8LY)	CN1CCCC1c1cccnc1	162.232	1.7862	10	IUPHAR:3978|TTD:D02BPT|TTD:D0T8LY	[<sup>3</sup>H]nicotine (IUPHAR:3978)	Labelled; Radioactive (IUPHAR:3978)			Metabolite (IUPHAR:3978)
D-01497	CN1CCC[C@H]1C1=CN=CC=C1 (DrugBank:DB00184)|CN1CCC[C@H]1c1cccnc1 (IUPHAR:2585)|c1cncc(c1)[C@@H]1CCCN1C (KEGG:D03365)|c1cncc(c1)[C@@H]1CCCN1C.OC(=O)[C@@H]([C@H](C(=O)O)O)O.O.OC(=O)[C@@H]([C@H](C(=O)O)O)O.O (KEGG:D05156)|N1([C@H](c2cnccc2)CCC1)C (TTD:D05QIM)|N1([C@@H](CCC1)c1cccnc1)C (TTD:D0T8GD)	CN1CCC[C@H]1c1cccnc1	162.232	1.7862	10	DrugBank:DB00184|IUPHAR:2585|KEGG:D03365|KEGG:D05156|TTD:D05QIM|TTD:D0T8GD	Nicotine (DrugBank:DB00184)|nicotine (IUPHAR:2585)|Nicotine (USP) (KEGG:D03365)|Nicotine bitartrate (USAN) (KEGG:D05156)|TA-NIC (TTD:D05QIM)|Nicotine (TTD:D0T8GD)	Approved (DrugBank:DB00184)|Approved (IUPHAR:2585)	54-11-5 (DrugBank:DB00184)|54-11-5 (KEGG:D03365)	N07BA01 (DrugBank:DB00184)|N07BA01 (KEGG:D03365)|N07BA01 (KEGG:D05156)	For the relief of nicotine withdrawal symptoms and as an aid to smoking cessation. (DrugBank:DB00184)|Metabolite (IUPHAR:2585)|Smoking cessation adjunct (KEGG:D03365)|Smoking cessation adjunct (KEGG:D05156)|Nicotine dependence (TTD:D05QIM)|Nicotine dependence (TTD:D0T8GD)
D-01498	CNCC\C=C\C1=CN=CC=C1 (DrugBank:DB05855)|CNCC/C=C/c1cccnc1 (IUPHAR:3994)|N(CC/C=C/c1cccnc1)C (TTD:D03UID)	CNCC/C=C/c1cccnc1	162.232	2.0952	10	DrugBank:DB05855|IUPHAR:3994|TTD:D03UID	Rivanicline (DrugBank:DB05855)|rivanicline (IUPHAR:3994)	Investigational (DrugBank:DB05855)	15585-43-0 (DrugBank:DB05855)		Investigated for use/treatment in ulcerative colitis. (DrugBank:DB05855)|Synthetic organic (IUPHAR:3994)|Cognitive disorders (TTD:D03UID)
D-01500	N1(CCNCC1)c1ccccc1 (TTD:D0X4RC)	N1CCN(CC1)c1ccccc1	162.232	1.49	10	TTD:D0X4RC
D-01502	C=CCSS(=O)CC=C (DrugBank:DB11780)|C=CCSS(=O)CC=C (IUPHAR:2419)|S(=O)(SCC=C)CC=C (TTD:D0X9YD)	C=CCSS(=O)CC=C	162.273	2.621	6	DrugBank:DB11780|IUPHAR:2419|TTD:D0X9YD	Allicin (DrugBank:DB11780)|allicin (IUPHAR:2419)	Investigational (DrugBank:DB11780)	539-86-6 (DrugBank:DB11780)		Natural product (IUPHAR:2419)
D-01506	O=C1NC2=CC=CC=C2C(=O)O1 (DrugBank:DB11593)	O=c1oc(=O)c2c([nH]1)cccc2	163.13	0.4813	8	DrugBank:DB11593	Isatoic anhydride (DrugBank:DB11593)	Experimental (DrugBank:DB11593)	118-48-9 (DrugBank:DB11593)
D-01508	O=N(=O)C1=CC=C2NN=CC2=C1 (DrugBank:DB04534)|[O-][N+](=O)c1cc2c([nH]nc2)cc1 (TTD:D0VB2W)	O=N(=O)c1ccc2c(c1)cn[nH]2	163.133	1.9943	7	DrugBank:DB04534|TTD:D0VB2W	5-Nitroindazole (DrugBank:DB04534)	Experimental (DrugBank:DB04534)
D-01510	[O-][N+](=O)c1cccc2c1[nH]nc2 (IUPHAR:5127)|[O-][N+](=O)c1c2[nH]ncc2ccc1 (TTD:D03WOZ)|[O-][N+](=O)c1c2[nH]ncc2ccc1 (TTD:D09BLF)	O=N(=O)c1cccc2c1[nH]nc2	163.133	1.9943	7	IUPHAR:5127|TTD:D03WOZ|TTD:D09BLF	7NI (IUPHAR:5127)				Synthetic organic (IUPHAR:5127)
D-01516	[H][C@]1(O)CN[C@]([H])(CO)[C@@]([H])(O)[C@]1([H])O (DrugBank:DB03206)|OC[C@H]1NC[C@@H]([C@H]([C@@H]1O)O)O (IUPHAR:4642)|[C@H]1([C@H]([C@@H]([C@H](CN1)O)O)O)CO (KEGG:D09605)|[C@H]1([C@H]([C@@H]([C@H](CN1)O)O)O)CO.Cl (KEGG:D09606)|O[C@@H]1[C@H](NC[C@H](O)[C@H]1O)CO (TTD:D0S5LT)	OC[C@H]1NC[C@@H]([C@H]([C@@H]1O)O)O	163.172	-2.638	6	DrugBank:DB03206|IUPHAR:4642|KEGG:D09605|KEGG:D09606|TTD:D0S5LT	Duvoglustat (DrugBank:DB03206)|1-deoxynojirimycin (IUPHAR:4642)|Duvoglustat (USAN/INN) (KEGG:D09605)|Duvoglustat hydrochloride (USAN) (KEGG:D09606)	Experimental; Investigational (DrugBank:DB03206)	19130-96-2 (DrugBank:DB03206)|19130-96-2 (KEGG:D09605)|73285-50-4 (KEGG:D09606)		Natural product (IUPHAR:4642)|Pharmacological chaperone (alpha-glucosidase) (KEGG:D09605)|Pharmacological chaperone (alpha-glucosidase) (KEGG:D09606)|Pompe's disease (TTD:D0S5LT)
D-01517	OC[C@H]1NC[C@H](O)[C@@H](O)[C@H]1O (DrugBank:DB05018)|OC[C@H]1NC[C@@H]([C@H]([C@H]1O)O)O (IUPHAR:10200)|[C@H]1([C@@H]([C@@H]([C@H](CN1)O)O)O)CO.Cl (KEGG:D05031)|[C@H]1([C@@H]([C@@H]([C@H](CN1)O)O)O)CO (KEGG:D10359)|O[C@H]1[C@H](NC[C@H](O)[C@H]1O)CO (TTD:D0A0UR)|O[C@H]1[C@H](NC[C@H](O)[C@H]1O)CO (TTD:D0MU9L)	OC[C@H]1NC[C@@H]([C@H]([C@H]1O)O)O	163.172	-2.638	6	DrugBank:DB05018|IUPHAR:10200|KEGG:D05031|KEGG:D10359|TTD:D0A0UR|TTD:D0MU9L	Migalastat (DrugBank:DB05018)|migalastat (IUPHAR:10200)|Migalastat hydrochloride (JAN/USAN) (KEGG:D05031)|Migalastat (USAN/INN) (KEGG:D10359)|Migalastat (TTD:D0MU9L)	Approved; Investigational (DrugBank:DB05018)|Approved (IUPHAR:10200)	108147-54-2 (DrugBank:DB05018)|75172-81-5 (KEGG:D05031)|108147-54-2 (KEGG:D10359)	A16AX14 (DrugBank:DB05018)|A16AX14 (KEGG:D05031)|A16AX14 (KEGG:D10359)	Migalastat is an alpha-galactosidase A (alpha-Gal A) pharmacological chaperone indicated for the long-term treatment of adults and adolescents aged 16 years and older with a confirmed diagnosis of Fabry disease (alpha-galactosidase A deficiency) and an amenable galactosidase alpha gene (GLA) mutation/variant based upon in vitro assay data [FDA Label, F1107]. This indication is approved by the US …
D-01519	O[C@@H]1[C@H](N[C@@H]([C@H]1O)CO)CO (TTD:D0R5HV)	OC[C@H]1N[C@@H]([C@H]([C@@H]1O)O)CO	163.172	-2.638	6	TTD:D0R5HV
D-01520	O[C@H]1[C@H](N[C@@H]([C@H]1O)CO)CO (TTD:D0SQ1T)	OC[C@H]1N[C@@H]([C@H]([C@H]1O)O)CO	163.172	-2.638	6	TTD:D0SQ1T
D-01523	O=C(NO)/C=C/c1ccccc1 (TTD:D07MYE)	ONC(=O)/C=C/c1ccccc1	163.173	1.5961	9	TTD:D07MYE
D-01524	n1(c2ncnc(N)c2nc1)CC (TTD:D03JFX)	CCn1cnc2c1ncnc2N	163.18	1.0096	7	TTD:D03JFX
D-01537	N1(CCNCC1)c1ncccc1 (TTD:D07JMN)	N1CCN(CC1)c1ccccn1	163.22	0.885	9	TTD:D07JMN	1-(pyridin-2-yl)piperazine (TTD:D07JMN)
D-01538	N1(CCNCC1)c1ccncc1 (TTD:D0T3HK)	N1CCN(CC1)c1ccncc1	163.22	0.885	9	TTD:D0T3HK
D-01541	SCC(CCCN)C(=O)O (TTD:D0R7PE)	NCCCC(C(=O)O)CS	163.238	1.0562	6	TTD:D0R7PE
D-01542	NCCCCC(C(=O)O)S (IUPHAR:8667)|SC(CCCCN)C(=O)O (TTD:D02BLC)	NCCCCC(C(=O)O)S	163.238	1.1987	6	IUPHAR:8667|TTD:D02BLC	Lys-thiol (IUPHAR:8667)				Synthetic organic (IUPHAR:8667)
D-01543	S=C=NCCC1=CC=CC=C1 (DrugBank:DB12695)|C(=S)=NCCc1ccccc1 (TTD:D07AOL)	S=C=NCCc1ccccc1	163.239	2.3319	9	DrugBank:DB12695|TTD:D07AOL	Phenethyl Isothiocyanate (DrugBank:DB12695)|PEITC (TTD:D07AOL)	Investigational (DrugBank:DB12695)	2257-09-2 (DrugBank:DB12695)		Prostate cancer (TTD:D07AOL)
D-01563	OC(=O)\C=C\C1=CC=C(O)C=C1 (DrugBank:DB04066)|OC(=O)/C=C/c1ccc(cc1)O (IUPHAR:5787)|Oc1ccc(cc1)/C=C/C(=O)O (TTD:D0AU0M)	OC(=O)/C=C/c1ccc(cc1)O	164.158	1.49	9	DrugBank:DB04066|IUPHAR:5787|TTD:D0AU0M	para-Coumaric Acid (DrugBank:DB04066)|para-coumaric acid (IUPHAR:5787)	Experimental (DrugBank:DB04066)			Synthetic organic (IUPHAR:5787)
D-01564	OC(=O)\C=C\C1=CC=CC=C1O (DrugBank:DB01650)	OC(=O)/C=C/c1ccccc1O	164.158	1.49	9	DrugBank:DB01650	trans-2-hydroxycinnamic acid (DrugBank:DB01650)	Experimental (DrugBank:DB01650)	614-60-8 (DrugBank:DB01650)
D-01566	O=C1CCNC(=O)c2[nH]ccc12 (TTD:D0TF0V)	O=C1CCNC(=O)c2c1cc[nH]2	164.161	0.6597	8	TTD:D0TF0V
D-01567	OC(=O)c1n[nH]c2c1CC1C2C1 (IUPHAR:5785)|OC(=O)c1n[nH]c2C3C(C3)Cc12 (TTD:D09TGC)	OC(=O)c1n[nH]c2c1CC1C2C1	164.161	0.7675	8	IUPHAR:5785|TTD:D09TGC	MK 1903 (IUPHAR:5785)|MK-1903 (TTD:D09TGC)				Synthetic organic (IUPHAR:5785)|Arteriosclerosis (TTD:D09TGC)
D-01568	SC(CCC(=O)O)C(=O)O (TTD:D08CYU)	OC(=O)CCC(C(=O)O)S	164.18	0.2342	5	TTD:D08CYU
D-01573	Oc1ccc(C(C)C)ccc1=O (TTD:D0Z1XR)	CC(c1ccc(=O)c(cc1)O)C	164.201	1.8758	10	TTD:D0Z1XR
D-01574	c1(cc(c(=O)ccc1)O)C(C)C (KEGG:D04876)	CC(c1cccc(=O)c(c1)O)C	164.201	1.8758	10	KEGG:D04876	Hinokitiol (KEGG:D04876)		499-44-5 (KEGG:D04876)		Antibacterial (KEGG:D04876)
D-01575	Oc1c(=O)cc(C(C)C)ccc1 (TTD:D0H4YW)	CC(c1cccc(c(=O)c1)O)C	164.201	1.8758	10	TTD:D0H4YW
D-01582	C1C[C@H](N1)COc1cccnc1 (IUPHAR:5460)|O(C[C@H]1NCC1)c1cccnc1 (TTD:D0Y6OE)	C1C[C@H](N1)COc1cccnc1	164.204	1.1511	9	IUPHAR:5460|TTD:D0Y6OE	A-85380 (IUPHAR:5460)				Synthetic organic (IUPHAR:5460)
D-01583	O=C(NCC#N)C1=CCCCC1 (TTD:D0P5BY)	N#CCNC(=O)C1=CCCCC1	164.204	1.51748	9	TTD:D0P5BY
D-01588	n1c(CC(C)C)cc(cc1N)C (TTD:D00EVC)	CC(Cc1cc(C)cc(n1)N)C	164.247	2.7519	10	TTD:D00EVC
D-01595	Oc1ccc(cc1)/C=C/[N+](=O)[O-] (TTD:D0W1BE)	Oc1ccc(cc1)/C=C/N(=O)=O	165.146	2.1628	8	TTD:D0W1BE
D-01601	CCOC(=O)C1=CC=C(N)C=C1 (DrugBank:DB01086)|c1(C(=O)OCC)ccc(cc1)N (KEGG:D00552)|O(C(=O)c1ccc(N)cc1)CC (TTD:D0Q8ZX)	CCOC(=O)c1ccc(cc1)N	165.189	2.0267	9	DrugBank:DB01086|KEGG:D00552|TTD:D0Q8ZX	Benzocaine (DrugBank:DB01086)|Benzocaine (USP/INN) (KEGG:D00552)|Benzocaine (TTD:D0Q8ZX)	Approved; Investigational (DrugBank:DB01086)	94-09-7 (DrugBank:DB01086)|94-09-7 (KEGG:D00552)	C05AD03; D04AB04; N01BA05; R02AD01 (DrugBank:DB01086)|C05AD03; D02BA01; D04AB04; N01BA05; R02AD01 (KEGG:D00552)	For general use as a lubricant and topical anesthetic on esophagus, larynx, mouth, nasal cavity, rectum, respiratory tract or trachea, urinary tract, vagina. It is also used to suppress gag reflex. (DrugBank:DB01086)|Analgesic, Anesthetic (topical), Antipruritic (KEGG:D00552)|Anesthesia (TTD:D0Q8ZX)
D-01606	N[C@H](CC1=CC=CC=C1)C(O)=O (DrugBank:DB02556)|N[C@@H](C(=O)O)Cc1ccccc1 (IUPHAR:5797)|OC(=O)[C@H](N)Cc1ccccc1 (TTD:D0B3LN)	N[C@@H](C(=O)O)Cc1ccccc1	165.189	1.3413	9	DrugBank:DB02556|IUPHAR:5797|TTD:D0B3LN	D-Phenylalanine (DrugBank:DB02556)|D-phenylalanine (IUPHAR:5797)	Experimental (DrugBank:DB02556)	673-06-3 (DrugBank:DB02556)		Metabolite (IUPHAR:5797)
D-01614	FCC1NCc2c(C1)cccc2 (TTD:D0E8HU)	FCC1NCc2c(C1)cccc2	165.207	1.9992	10	TTD:D0E8HU
D-01620	OS(=O)(=O)C1CCNCC1 (IUPHAR:4287)|S(=O)(=O)(O)C1CCNCC1 (TTD:D0VW5M)	OS(=O)(=O)C1CCNCC1	165.211	1.0358	5	IUPHAR:4287|TTD:D0VW5M	piperidine-4-sulphonic acid (IUPHAR:4287)				Synthetic organic (IUPHAR:4287)
D-01622	C#CCO[C@H]1CN2CCC1CC2 (DrugBank:DB12287)|C(=O)(/C=C/C(=O)O)O.C1N2CCC(C1)[C@H](C2)OCC#C (KEGG:D06000)	C#CCO[C@H]1CN2CCC1CC2	165.232	0.6683	10	DrugBank:DB12287|KEGG:D06000	Talsaclidine (DrugBank:DB12287)|Talsaclidine fumarate (USAN) (KEGG:D06000)	Investigational (DrugBank:DB12287)	147025-53-4 (DrugBank:DB12287)|147025-54-5 (KEGG:D06000)		Dementia therapeutic agent, Muscarinic acetylcholine receptor M1 agonist (KEGG:D06000)
D-01626	CN[C@@H](C)[C@H](O)C1=CC=CC=C1 (DrugBank:DB01364)|CN[C@H]([C@@H](c1ccccc1)O)C (IUPHAR:556)|c1cccc(c1)[C@H]([C@@H](NC)C)O (KEGG:D00124)|c1cccc(c1)[C@H]([C@@H](NC)C)O.Cl (KEGG:D01386)|c1cccc(c1)[C@H]([C@@H](NC)C)O.S(=O)(=O)(O)O.c1cc([C@H]([C@@H](NC)C)O)ccc1 (KEGG:D04018)|O[C@@H]([C@@H](NC)C)c1ccccc1 (TTD:D0LG8E)	CN[C@H]([C@@H](c1ccccc1)O)C	165.232	1.7188	10	DrugBank:DB01364|IUPHAR:556|KEGG:D00124|KEGG:D01386|KEGG:D04018|TTD:D0LG8E	Ephedrine (DrugBank:DB01364)|ephedrine (IUPHAR:556)|Ephedrine (USP) (KEGG:D00124)|Ephedrine hydrochloride (JP17/USP) (KEGG:D01386)|Ephedrine sulfate (USP) (KEGG:D04018)|Ephedrine (TTD:D0LG8E)	Approved (DrugBank:DB01364)|Approved (IUPHAR:556)	299-42-3 (DrugBank:DB01364)|299-42-3 (KEGG:D00124)|50-98-6 (KEGG:D01386)|134-72-5 (KEGG:D04018)	A08AA56; C01CA26; R01AA03; R01AB05; R03CA02; S01FB02 (DrugBank:DB01364)|C01CA26; R01AA03; R01AB05; R03CA02; S01FB02 (KEGG:D00124)|C01CA26; R01AA03; R01AB05; R03CA02; S01FB02 (KEGG:D01386)|C01CA26; R01AA03; R01AB05; R03CA02; S01FB02 (KEGG:D04018)	Ephedrine commonly used as a stimulant, appetite suppressant, concentration aid, decongestant, and to treat hypotension associated with anaesthesia. (DrugBank:DB01364)|Synthetic organic (IUPHAR:556)|Bronchodilator, Adrenergic receptor agonist (KEGG:D00124)|Antitussive, Bronchodilator, Adrenergic receptor agonist (KEGG:D01386)|Antihypotensive, Bronchodilator, Adrenergic receptor agonist (KEGG:D040…
D-01627	CN[C@@H](C)[C@@H](O)C1=CC=CC=C1 (DrugBank:DB00852)|CN[C@H]([C@H](c1ccccc1)O)C (IUPHAR:7286)|Cl.c1cccc(c1)[C@@H]([C@@H](NC)C)O (KEGG:D00485)|S(=O)(=O)(O)O.c1(ccccc1)[C@@H]([C@@H](NC)C)O.c1(ccccc1)[C@@H]([C@@H](NC)C)O (KEGG:D05649)|c1cccc(c1)[C@@H]([C@@H](NC)C)O (KEGG:D08449)|O[C@H]([C@@H](NC)C)c1ccccc1 (TTD:D00HHS)	CN[C@H]([C@H](c1ccccc1)O)C	165.232	1.7188	10	DrugBank:DB00852|IUPHAR:7286|KEGG:D00485|KEGG:D05649|KEGG:D08449|TTD:D00HHS	Pseudoephedrine (DrugBank:DB00852)|pseudoephedrine (IUPHAR:7286)|Pseudoephedrine hydrochloride (USP) (KEGG:D00485)|Pseudoephedrine sulfate (USP) (KEGG:D05649)|Pseudoephedrine (INN) (KEGG:D08449)|Pseudoephedrine (TTD:D00HHS)	Approved (DrugBank:DB00852)|Approved (IUPHAR:7286)	90-82-4 (DrugBank:DB00852)|345-78-8 (KEGG:D00485)|7460-12-0 (KEGG:D05649)|90-82-4 (KEGG:D08449)	R01BA02; R01BA52 (DrugBank:DB00852)|R01BA02 (KEGG:D00485)|R01BA02 (KEGG:D05649)|R01BA02 (KEGG:D08449)	For the treatment of nasal congestion, sinus congestion, Eustachian tube congestion, and vasomotor rhinitis, and as an adjunct to other agents in the optimum treatment of allergic rhinitis, croup, sinusitis, otitis media, and tracheobronchitis. Also used as first-line therapy of priapism. (DrugBank:DB00852)|Synthetic organic (IUPHAR:7286)|Vasoconstrictor, Adrenergic receptor agonist (KEGG:D00485)…
D-01636	N1CCC(CC1)Cc1[nH]cnc1 (IUPHAR:1251)|N1CCC(CC1)Cc1[nH]cnc1 (TTD:D0OM9G)	N1CCC(CC1)Cc1[nH]cnc1	165.236	1.2806	9	IUPHAR:1251|TTD:D0OM9G	immepip (IUPHAR:1251)				Synthetic organic (IUPHAR:1251)
D-01637	S1CCNCc2c1cccc2 (TTD:D0B2BO)	C1CSc2c(CN1)cccc2	165.255	2.2107	9	TTD:D0B2BO
D-01645	c12c(c(=O)[nH]c(=O)[nH]1)n(cn2)C (TTD:D04RKW)	O=c1[nH]c(=O)c2c([nH]1)ncn2C	166.137	-1.0501	6	TTD:D04RKW	7-methylxanthine (TTD:D04RKW)				Myopia (TTD:D04RKW)
D-01650	CCOC(=O)C1=CC=C(O)C=C1 (DrugBank:DB13628)|c1cc(ccc1C(=O)OCC)O (KEGG:D01647)	CCOC(=O)c1ccc(cc1)O	166.174	1.5689	9	DrugBank:DB13628|KEGG:D01647	Ethyl hydroxybenzoate (DrugBank:DB13628)|Ethyl parahydroxybenzoate (JP17) (KEGG:D01647)	Approved; Experimental (DrugBank:DB13628)	120-47-8 (DrugBank:DB13628)|120-47-8 (KEGG:D01647)	D01AE10 (DrugBank:DB13628)	Pharmaceutic aid (antifungal preservative) (KEGG:D01647)
D-01656	OC(=O)c1n[nH]c2CCCCc12 (TTD:D06UZK)	OC(=O)c1n[nH]c2c1CCCC2	166.177	0.9867	8	TTD:D06UZK
D-01661	O(c1ccc(OCC)cc1)CC (TTD:D07DGS)	CCOc1ccc(cc1)OCC	166.217	2.484	10	TTD:D07DGS
D-01663	CC(C)(C)C1=CC(O)=CC=C1O (DrugBank:DB07726)|Oc1c(C(C)(C)C)cc(O)cc1 (TTD:D0DQ2G)|Oc1c(C(C)(C)C)cc(O)cc1 (TTD:D0O3AX)	Oc1ccc(c(c1)C(C)(C)C)O	166.217	2.3953	10	DrugBank:DB07726|TTD:D0DQ2G|TTD:D0O3AX	2-tert-butylbenzene-1,4-diol (DrugBank:DB07726)	Experimental (DrugBank:DB07726)
D-01664	OC(Cc1nc(N)cc(c1)C)C (TTD:D02ZGN)	CC(Cc1cc(C)cc(n1)N)O	166.22	1.4767	9	TTD:D02ZGN
D-01666	o1nc(cc1[C@H]1N(CCC1)C)C (TTD:D09ADT)	CN1CCC[C@H]1c1onc(c1)C	166.22	1.6876	9	TTD:D09ADT					Alzheimer disease (TTD:D09ADT)
D-01669	CC[N+](C)(C)C1=CC(O)=CC=C1 (DrugBank:DB01010)|CC[N+](c1cccc(c1)O)(C)C (IUPHAR:9073)|[Cl-].c1(cccc(c1)[N+](CC)(C)C)O (KEGG:D00994)|Oc1cc([N+](CC)(C)C)ccc1 (TTD:D0S5LH)	CC[N+](c1cccc(c1)O)(C)C	166.24	1.979	10	DrugBank:DB01010|IUPHAR:9073|KEGG:D00994|TTD:D0S5LH	Edrophonium (DrugBank:DB01010)|edrophonium (IUPHAR:9073)|Edrophonium chloride (JP17/USP/INN) (KEGG:D00994)|Edrophonium (TTD:D0S5LH)	Approved (DrugBank:DB01010)|Approved (IUPHAR:9073)	312-48-1 (DrugBank:DB01010)|116-38-1 (KEGG:D00994)		For the differential diagnosis of myasthenia gravis and as an adjunct in the evaluation of treatment requirements in this disease. It may also be used for evaluating emergency treatment in myasthenic crises. (DrugBank:DB01010)|Synthetic organic (IUPHAR:9073)|Antidote (to curare principles), Diagnostic aid (myasthenia gravis) (KEGG:D00994)|Myasthenia gravis diagnosis (TTD:D0S5LH)
D-01671	N1=C(N)CCCCC1C/C=C/C (TTD:D01YNT)	C/C=C/CC1CCCCC(=N1)N	166.263	2.3883	10	TTD:D01YNT
D-01677	OC(=O)C1=CC=CC(=N1)C(O)=O (DrugBank:DB04267)	OC(=O)c1cccc(n1)C(=O)O	167.119	0.478	7	DrugBank:DB04267	Dipicolinic Acid (DrugBank:DB04267)	Experimental (DrugBank:DB04267)
D-01678	OC(=O)c1ccnc(c1)C(=O)O (IUPHAR:8744)|OC(=O)c1cc(ncc1)C(=O)O (TTD:D07IOY)	OC(=O)c1ccnc(c1)C(=O)O	167.119	0.478	7	IUPHAR:8744|TTD:D07IOY	compound 6a [PMID: 18942826] (IUPHAR:8744)				Synthetic organic (IUPHAR:8744)
D-01679	OC(=O)C1=CC=CN=C1C(O)=O (DrugBank:DB01796)|OC(=O)c1c(nccc1)C(=O)O (TTD:D0L8CF)	OC(=O)c1ncccc1C(=O)O	167.119	0.478	7	DrugBank:DB01796|TTD:D0L8CF	Quinolinic Acid (DrugBank:DB01796)	Experimental (DrugBank:DB01796)	89-00-9 (DrugBank:DB01796)
D-01684	CC(C)C[C@H](N)P(O)(O)=O (DrugBank:DB02386)	N[C@H](P(=O)(O)O)CC(C)C	167.143	1.1953	5	DrugBank:DB02386	Leucine Phosphonic Acid (DrugBank:DB02386)	Experimental (DrugBank:DB02386)
D-01691	OC(=O)[C@H](c1cccc(c1)O)N (IUPHAR:1366)|Oc1cc([C@H](N)C(=O)O)ccc1 (TTD:D0U5YT)	OC(=O)[C@H](c1cccc(c1)O)N	167.162	1.1769	8	IUPHAR:1366|TTD:D0U5YT	(<i>S</i>)-3HPG (IUPHAR:1366)|(S)-3HPG (TTD:D0U5YT)				Synthetic organic (IUPHAR:1366)
D-01694	c12c(nc([nH]c1=S)N)[nH]cn2 (KEGG:D08603)	Nc1[nH]c(=S)c2c(n1)[nH]cn2	167.192	1.1789	5	KEGG:D08603	Tioguanine (INN) (KEGG:D08603)		154-42-7 (KEGG:D08603)	L01BB03 (KEGG:D08603)	Antineoplastic, Antimetabolite (KEGG:D08603)
D-01701	CNCC(O)C1=CC=C(O)C=C1 (DrugBank:DB09203)|c1c(ccc(c1)C(CNC)O)O (KEGG:D07148)|c1c(ccc(c1)C(CNC)O)O.OC(=O)[C@@H]([C@H](C(=O)O)O)O.c1c(ccc(c1)C(CNC)O)O (KEGG:D08308)|c1c(ccc(c1)C(CNC)O)O.Cl (KEGG:D08309)	CNCC(c1ccc(cc1)O)O	167.205	1.0359	9	DrugBank:DB09203|KEGG:D07148|KEGG:D08308|KEGG:D08309	Synephrine (DrugBank:DB09203)|Oxedrine (BAN) (KEGG:D07148)|Oxedrine tartrate (KEGG:D08308)|Oxedrine hydrochloride (KEGG:D08309)	Experimental (DrugBank:DB09203)	94-07-5 (DrugBank:DB09203)|94-07-5 (KEGG:D07148)|16589-24-5 (KEGG:D08308)|5985-28-4 (KEGG:D08309)	C01CA08; S01GA06; S01GA56 (DrugBank:DB09203)|C01CA08; S01GA06 (KEGG:D07148)|C01CA08; S01GA06 (KEGG:D08308)|C01CA08; S01GA06 (KEGG:D08309)	Antihypotensive, Sympathomimetic (KEGG:D07148)|Antihypotensive, Sympathomimetic (KEGG:D08308)|Antihypotensive, Sympathomimetic (KEGG:D08309)
D-01702	CNCCC1=CC(O)=C(O)C=C1 (DrugBank:DB13917)	CNCCc1ccc(c(c1)O)O	167.205	1.2506	9	DrugBank:DB13917	Deoxyepinephrine (DrugBank:DB13917)	Experimental (DrugBank:DB13917)	501-15-5 (DrugBank:DB13917)
D-01703	CNC[C@H](O)C1=CC(O)=CC=C1 (DrugBank:DB00388)|CNC[C@@H](c1cccc(c1)O)O (IUPHAR:485)|Cl.c1(cccc(c1)[C@H](CNC)O)O (KEGG:D00511)|c1(cccc(c1)[C@H](CNC)O)O (KEGG:D08365)|OC(=O)[C@@H]([C@H](C(=O)O)O)O.c1(cccc(c1)[C@H](CNC)O)O (KEGG:D08966)|c1(cc(O)ccc1)[C@@H](O)CNC.Cl (TTD:D0D7QO)|O[C@@H](CNC)c1cc(O)ccc1 (TTD:D0O6IU)	CNC[C@@H](c1cccc(c1)O)O	167.205	1.0359	9	DrugBank:DB00388|IUPHAR:485|KEGG:D00511|KEGG:D08365|KEGG:D08966|TTD:D0D7QO|TTD:D0O6IU	Phenylephrine (DrugBank:DB00388)|phenylephrine (IUPHAR:485)|Phenylephrine hydrochloride (JP17/USP) (KEGG:D00511)|Phenylephrine (INN) (KEGG:D08365)|Phenylephrine bitartrate (USP) (KEGG:D08966)|Phenylephrine hydrochloride gel (TTD:D0D7QO)|Phenylephrine (TTD:D0O6IU)	Approved (DrugBank:DB00388)|Approved (IUPHAR:485)	59-42-7 (DrugBank:DB00388)|61-76-7 (KEGG:D00511)|59-42-7 (KEGG:D08365)|17162-39-9 (KEGG:D08966)	C01CA06; R01AA04; R01AB01; R01BA03; R01BA53; S01FB01; S01FB51; S01GA05; S01GA55 (DrugBank:DB00388)|C01CA06; R01AA04; R01AB01; R01BA03; S01FB01; S01GA05 (KEGG:D00511)|C01CA06; R01AA04; R01AB01; R01BA03; S01FB01; S01GA05 (KEGG:D08365)|C01CA06; R01AA04; R01AB01; R01BA03; S01FB01; S01GA05 (KEGG:D08966)	Phenylephrine is mainly used to treat nasal congestion, but may also be useful in treating hypotension and shock, hypotension during spinal anaesthesia, prolongation of spinal anaesthesia, paroxysmal supraventricular tachycardia, symptomatic relief of external or internal hemorrhoids, and to increase blood pressure as an aid in the diagnosis of heart murmurs. (DrugBank:DB00388)|Synthetic organic …
D-01706	NCCc1ccc(c(c1)OC)O (IUPHAR:6642)|O(c1cc(CCN)ccc1O)C (TTD:D09ERP)	NCCc1ccc(c(c1)OC)O	167.205	1.6023	9	IUPHAR:6642|TTD:D09ERP	3-methoxytyramine (IUPHAR:6642)|3-methoxytyramine (TTD:D09ERP)				Metabolite (IUPHAR:6642)
D-01710	O=CN(C1CCC1)C1CCCC1 (DrugBank:DB04065)	O=CN(C1CCC1)C1CCCC1	167.248	2.5758	10	DrugBank:DB04065	N-Cyclopentyl-N-Cyclobutylformamide (DrugBank:DB04065)	Experimental (DrugBank:DB04065)
D-01714	CNC1(C)C2CCC(C2)C1(C)C (DrugBank:DB00657)|CNC1(C)C2CCC(C1(C)C)C2 (IUPHAR:3990)|C1(C2CC(C1(C)C)CC2)(C)NC.Cl (KEGG:D00611)|N(C1(C(C2CC1CC2)(C)C)C)C (TTD:D0V8HA)	CNC1(C)C2CCC(C1(C)C)C2	167.291	2.8115	11	DrugBank:DB00657|IUPHAR:3990|KEGG:D00611|TTD:D0V8HA	Mecamylamine (DrugBank:DB00657)|mecamylamine (IUPHAR:3990)|Mecamylamine hydrochloride (USP) (KEGG:D00611)|Mecamylamine (TTD:D0V8HA)	Approved; Investigational (DrugBank:DB00657)|Approved (IUPHAR:3990)	60-40-2 (DrugBank:DB00657)|826-39-1 (KEGG:D00611)	C02BB01 (DrugBank:DB00657)|C02BB01 (KEGG:D00611)	For the treatment of moderately severe to severe essential hypertension and in uncomplicated cases of malignant hypertension (DrugBank:DB00657)|Synthetic organic (IUPHAR:3990)|Antihypertensive (KEGG:D00611)|Moderately severe to severe essential hypertension (TTD:D0V8HA)
D-01715	CN[C@@]1(C)[C@@H]2CC[C@@H](C2)C1(C)C (DrugBank:DB11807)|[C@@]1([C@H]2C[C@@H](C1(C)C)CC2)(C)NC (KEGG:D10111)|[C@@]1([C@H]2C[C@@H](C1(C)C)CC2)(C)NC.Cl (KEGG:D10112)	CN[C@@]1(C)[C@@H]2CC[C@H](C1(C)C)C2	167.291	2.8115	11	DrugBank:DB11807|KEGG:D10111|KEGG:D10112	Dexmecamylamine (DrugBank:DB11807)|Dexmecamylamine (USAN) (KEGG:D10111)|Dexmecamylamine hydrochloride (USAN) (KEGG:D10112)	Investigational (DrugBank:DB11807)	107538-05-6 (DrugBank:DB11807)|107538-05-6 (KEGG:D10111)|107596-30-5 (KEGG:D10112)		Antidepressant, Nicotinic acetylcholine receptor alpha4/beta2 antagonist (KEGG:D10111)|Antidepressant, Nicotinic acetylcholine receptor alpha4/beta2 antagonist (KEGG:D10112)
D-01718	OC(=O)C(=C)OP(O)(O)=O (DrugBank:DB01819)|OC(=O)C(=C)OP(=O)(O)O (IUPHAR:4692)|P(=O)(OC(=C)C(=O)O)(O)O (TTD:D0T3AE)	OC(=O)C(=C)OP(=O)(O)O	168.042	-0.306	3	DrugBank:DB01819|IUPHAR:4692|TTD:D0T3AE	Phosphoenolpyruvate (DrugBank:DB01819)|phosphoenolpyruvic acid (IUPHAR:4692)	Experimental (DrugBank:DB01819)	138-08-9 (DrugBank:DB01819)		Metabolite (IUPHAR:4692)
D-01722	O=C1NC2=C(N1)C(=O)NC(=O)N2 (DrugBank:DB08844)|O=c1[nH]c2c([nH]1)[nH]c(=O)[nH]c2=O (IUPHAR:4731)|O=c1[nH]c(=O)[nH]c2[nH]c(=O)[nH]c12 (TTD:D0D3CS)	O=c1[nH]c2c([nH]1)[nH]c(=O)[nH]c2=O	168.11	-1.7672	5	DrugBank:DB08844|IUPHAR:4731|TTD:D0D3CS	Uric acid (DrugBank:DB08844)|uric acid (IUPHAR:4731)|uric acid (TTD:D0D3CS)	Investigational (DrugBank:DB08844)	69-93-2 (DrugBank:DB08844)		At present (August 2013), there is no approved indication for uric acid. The potential therapeutic use for uric acid is as an adjunct in acute ischemic stroke. (DrugBank:DB08844)|Metabolite (IUPHAR:4731)
D-01724	O1C2C3C(C1CC2)C(=O)OC3=O (TTD:D0S9QL)|O1C2C3C(C1CC2)C(=O)OC3=O (TTD:D0W4IL)	O=C1OC(=O)C2C1C1CCC2O1	168.147	-0.1366	8	TTD:D0S9QL|TTD:D0W4IL
D-01727	OC(=O)CC1=CC(O)=C(O)C=C1 (DrugBank:DB01702)|Oc1cc(CC(=O)O)ccc1O (TTD:D04UPU)	OC(=O)Cc1ccc(c(c1)O)O	168.147	0.7249	8	DrugBank:DB01702|TTD:D04UPU	2-(3,4-Dihydroxyphenyl)Acetic Acid (DrugBank:DB01702)	Experimental (DrugBank:DB01702)	102-32-9 (DrugBank:DB01702)
D-01731	c1(ccc2c(c1)oc(=O)s2)O (KEGG:D07211)|s1c2c(oc1=O)cc(O)cc2 (TTD:D0M8UY)	Oc1ccc2c(c1)oc(=O)s2	168.17	1.5601	7	KEGG:D07211|TTD:D0M8UY	Tioxolone (INN/BAN) (KEGG:D07211)		4991-65-5 (KEGG:D07211)	D10AB03 (KEGG:D07211)	Keratolytic (KEGG:D07211)
D-01736	CCCCc1cc(n[nH]1)C(=O)O (IUPHAR:1591)|OC(=O)c1n[nH]c(CCCC)c1 (TTD:D0FF9F)	CCCCc1cc(n[nH]1)C(=O)O	168.193	1.4505	8	IUPHAR:1591|TTD:D0FF9F	5-butyl-1H-pyrazole-3-carboxylic acid (IUPHAR:1591)				Synthetic organic (IUPHAR:1591)
D-01742	o1[nH]c(=O)cc1C1CCNCC1 (TTD:D05SVA)	O=c1[nH]oc(c1)C1CCNCC1	168.193	0.7637	8	TTD:D05SVA	5-(piperidin-4-yl)isoxazol-3-ol (TTD:D05SVA)
D-01743	c1ccc2c(c1)[nH]c1c2ccnc1 (IUPHAR:8222)|[nH]1c2c(c3c1cncc3)cccc2 (TTD:D0R6FJ)	c1ccc2c(c1)[nH]c1c2ccnc1	168.195	2.7161	11	IUPHAR:8222|TTD:D0R6FJ	beta-carboline (IUPHAR:8222)				Synthetic organic (IUPHAR:8222)
D-01744	FC(Cc1nc(N)cc(c1)C)C (TTD:D07VFC)	CC(Cc1cc(C)cc(n1)N)F	168.211	2.4539	9	TTD:D07VFC
D-01745	FCCCc1nc(N)cc(c1)C (TTD:D08FXW)	FCCCc1cc(C)cc(n1)N	168.211	2.4555	9	TTD:D08FXW
D-01752	O=C(N1CCCC1)[C@H]1NCCC1 (TTD:D07IJU)	O=C([C@@H]1CCCN1)N1CCCC1	168.236	0.6275	9	TTD:D07IJU
D-01754	C1CCN(CC1)C1CCNCC1 (DrugBank:DB03056)|N1(C2CCNCC2)CCCCC1 (TTD:D07WHV)	C1CCN(CC1)C1CCNCC1	168.279	1.491	10	DrugBank:DB03056|TTD:D07WHV	4-Piperidino-Piperidine (DrugBank:DB03056)	Experimental (DrugBank:DB03056)
D-01755	N1=C(N)CCCCC1CCCC (TTD:D03QMU)	CCCCC1CCCCC(=N1)N	168.279	2.6123	10	TTD:D03QMU
D-01758	Clc1ccc2c(c1)nc(o2)N (IUPHAR:2327)|Clc1cc2nc(oc2cc1)N (TTD:D0N0LB)	Clc1ccc2c(c1)nc(o2)N	168.58	2.6446	7	IUPHAR:2327|TTD:D0N0LB	zoxazolamine (IUPHAR:2327)				Synthetic organic (IUPHAR:2327)|Myeloma disease (TTD:D0N0LB)
D-01768	F[C@]1([C@@H](N)C1)c1ccc(F)cc1 (TTD:D08PHY)	N[C@H]1C[C@]1(F)c1ccc(cc1)F	169.171	2.4218	9	TTD:D08PHY
D-01769	NCC(c1ccc(c(c1)O)O)O (IUPHAR:484)|c1(ccc(c(c1)O)O)C(CN)O.Cl (KEGG:D09794)|OC(c1cc(O)c(O)cc1)CN (TTD:D06GJW)	NCC(c1ccc(c(c1)O)O)O	169.178	0.7902	8	IUPHAR:484|KEGG:D09794|TTD:D06GJW	noradrenaline (IUPHAR:484)|Norepinephrine hydrochloride (JAN) (KEGG:D09794)		55-27-6 (KEGG:D09794)	C01CA03 (KEGG:D09794)	Metabolite (IUPHAR:484)|Antihypotensive, Vasoconstrictor, Adrenergic receptor agonist (KEGG:D09794)
D-01770	c1(c(cc(c(c1)CCN)O)O)O (KEGG:D05294)	NCCc1cc(O)c(cc1O)O	169.178	1.0049	8	KEGG:D05294	Oxidopamine (USAN/INN) (KEGG:D05294)		1199-18-4 (KEGG:D05294)		Inducer (parkinsonism) (KEGG:D05294)
D-01771	NC[C@H](O)C1=CC(O)=C(O)C=C1 (DrugBank:DB00368)|NC[C@@H](c1ccc(c(c1)O)O)O (IUPHAR:505)|c1(ccc(c(c1)O)O)[C@H](CN)O (KEGG:D00076)|c1(ccc(c(c1)O)O)[C@H](CN)O.OC(=O)[C@@H]([C@H](C(=O)O)O)O.O (KEGG:D05206)|c1(ccc(c(c1)O)O)[C@H](CN)O.Cl (KEGG:D08284)|O[C@H](c1cc(O)c(O)cc1)CN (TTD:D07MOX)|O[C@H](c1cc(O)c(O)cc1)CN (TTD:D0R2UN)	NC[C@@H](c1ccc(c(c1)O)O)O	169.178	0.7902	8	DrugBank:DB00368|IUPHAR:505|KEGG:D00076|KEGG:D05206|KEGG:D08284|TTD:D07MOX|TTD:D0R2UN	Norepinephrine (DrugBank:DB00368)|(-)-noradrenaline (IUPHAR:505)|Noradrenaline (JP17) (KEGG:D00076)|Norepinephrine bitartrate (USP) (KEGG:D05206)|Norepinephrine hydrochoride (KEGG:D08284)|Norepinephrine (TTD:D07MOX)	Approved (DrugBank:DB00368)|Approved (IUPHAR:505)	51-41-2 (DrugBank:DB00368)|51-41-2 (KEGG:D00076)|69815-49-2 (KEGG:D05206)|329-56-6 (KEGG:D08284)	C01CA03 (DrugBank:DB00368)|C01CA03 (KEGG:D00076)|C01CA03 (KEGG:D05206)|C01CA03 (KEGG:D08284)	Mainly used to treat patients in vasodilatory shock states such as septic shock and neurogenic shock and has shown a survival benefit over dopamine. Also used as a vasopressor medication for patients with critical hypotension. (DrugBank:DB00368)|Metabolite (IUPHAR:505)|Antihypotensive, Vasoconstrictor, Adrenergic receptor agonist (KEGG:D00076)|Antihypotensive, Vasoconstrictor, Adrenergic receptor…
D-01776	O(C1C2NC(C1)CCC2)C(=O)C (TTD:D01UDC)	CC(=O)OC1CC2NC1CCC2	169.221	1.1613	9	TTD:D01UDC
D-01777	O(C(=O)C)C1CN2CCC1CC2 (KEGG:D02750)	CC(=O)OC1CN2CCC1CC2	169.221	0.5816	9	KEGG:D02750	Aceclidine (USAN/INN) (KEGG:D02750)		827-61-2 (KEGG:D02750)	S01EB08 (KEGG:D02750)	Antihypertensive (intraocular), Miotic, Muscarinic acetylcholine receptor agonist (KEGG:D02750)
D-01779	n1c(C#CC2=CCCC2)cccc1 (TTD:D05FCO)	c1ccc(nc1)C#CC1=CCCC1	169.222	2.5434	12	TTD:D05FCO
D-01784	ClC1=CC2=C(OC(=O)N2)C=C1 (DrugBank:DB00356)|Clc1ccc2c(c1)[nH]c(=O)o2 (IUPHAR:2322)|Clc1cc2[nH]c(=O)oc2cc1 (TTD:D08ZEB)	Clc1ccc2c(c1)[nH]c(=O)o2	169.565	1.7745	7	DrugBank:DB00356|IUPHAR:2322|TTD:D08ZEB	Chlorzoxazone (DrugBank:DB00356)|chlorzoxazone (IUPHAR:2322)|Chlorzoxazone (TTD:D08ZEB)	Approved (DrugBank:DB00356)|Approved (IUPHAR:2322)	95-25-0 (DrugBank:DB00356)	M03BB03; M03BB53; M03BB73 (DrugBank:DB00356)	For the relief of discomfort associated with acute painful musculoskeletal conditions. (DrugBank:DB00356)|Synthetic organic (IUPHAR:2322)|Acute pain (TTD:D08ZEB)
D-01786	CC(Cc1ccc(cc1)Cl)N (IUPHAR:4592)|Clc1ccc(CC(N)C)cc1 (TTD:D06CMJ)	CC(Cc1ccc(cc1)Cl)N	169.651	2.93	9	IUPHAR:4592|TTD:D06CMJ	p-chloroamphetamine (IUPHAR:4592)				Synthetic organic (IUPHAR:4592)
D-01794	OC(=O)c1cc(O)c(c(c1)O)O (IUPHAR:5549)|Oc1c(O)cc(cc1O)C(=O)O (TTD:D0Y3TZ)	OC(=O)c1cc(O)c(c(c1)O)O	170.12	0.5016	7	IUPHAR:5549|TTD:D0Y3TZ	gallic acid (IUPHAR:5549)				Metabolite (IUPHAR:5549)
D-01806	[nH]1c2c(CCN=C2)c2c1cccc2 (TTD:D0G8BT)	N1=Cc2c(CC1)c1c([nH]2)cccc1	170.211	1.5785	11	TTD:D0G8BT
D-01810	C[n+]1ccc(cc1)c1ccccc1 (IUPHAR:4568)|[n+]1(ccc(c2ccccc2)cc1)C (TTD:D09HLX)	C[n+]1ccc(cc1)c1ccccc1	170.23	2.1781	12	IUPHAR:4568|TTD:D09HLX	MPP<sup>+</sup> (IUPHAR:4568)|MPP+ (TTD:D09HLX)				Synthetic organic (IUPHAR:4568)
D-01811	CCCC1=CC(=O)NC(=S)N1 (DrugBank:DB00550)|CCCc1cc(=O)[nH]c(=S)[nH]1 (IUPHAR:6650)|c1(cc(=O)[nH]c(=S)[nH]1)CCC (KEGG:D00562)|S=c1[nH]c(CCC)cc(=O)[nH]1 (TTD:D00MIN)|S=c1[nH]c(CCC)cc(=O)[nH]1 (TTD:D0K2MK)	CCCc1cc(=O)[nH]c(=S)[nH]1	170.232	1.385	7	DrugBank:DB00550|IUPHAR:6650|KEGG:D00562|TTD:D00MIN|TTD:D0K2MK	Propylthiouracil (DrugBank:DB00550)|propylthiouracil (IUPHAR:6650)|Propylthiouracil (JP17/USP/INN) (KEGG:D00562)|Propylthiouracil (TTD:D00MIN)	Approved; Investigational (DrugBank:DB00550)|Approved (IUPHAR:6650)	51-52-5 (DrugBank:DB00550)|51-52-5 (KEGG:D00562)	H03BA02 (DrugBank:DB00550)|H03BA02 (KEGG:D00562)	Used to manage hyperthyroidism which is due to an overactive thyroid gland (Grave's disease). (DrugBank:DB00550)|Synthetic organic (IUPHAR:6650)|Antithyroid, Thyroid hormone synthesis inhibitor (KEGG:D00562)|Alcoholic hepatitis; Hyperthyroidism (TTD:D00MIN)
D-01813	NC(=N)SCCc1cnc[nH]1 (IUPHAR:1250)|S(CCc1[nH]cnc1)C(=N)N (TTD:D02RAN)	NC(=N)SCCc1cnc[nH]1	170.235	1.3789	6	IUPHAR:1250|TTD:D02RAN	imetit (IUPHAR:1250)				Synthetic organic (IUPHAR:1250)
D-01817	O1CC(N=C(N)CC1)CCCC (TTD:D0L9SL)	CCCCC1COCCC(=N1)N	170.252	1.4586	9	TTD:D0L9SL
D-01820	O=C(N1CCCC1)C(N)C(C)C (TTD:D0L9XR)	NC(C(=O)N1CCCC1)C(C)C	170.252	1.2303	9	TTD:D0L9XR
D-01821	[H][C@](N)(C(C)C)C(=O)N1CCCC1 (DrugBank:DB01884)	N[C@H](C(=O)N1CCCC1)C(C)C	170.252	1.2303	9	DrugBank:DB01884	2-Amino-3-Methyl-1-Pyrrolidin-1-Yl-Butan-1-One (DrugBank:DB01884)	Experimental (DrugBank:DB01884)
D-01827	ONC(=O)COP(O)(O)=O (DrugBank:DB03026)|P(=O)(OCC(=O)NO)(O)O (TTD:D0RO6K)	ONC(=O)COP(=O)(O)O	171.046	-1.008	2	DrugBank:DB03026|TTD:D0RO6K	Phosphoglycolohydroxamic Acid (DrugBank:DB03026)	Experimental (DrugBank:DB03026)	51528-59-7 (DrugBank:DB03026)
D-01832	CC1=NC=C(N1CCO)[N+]([O-])=O (DrugBank:DB00916)|n1(c(cnc1C)[N+](=O)[O-])CCO (KEGG:D00409)|n1(c(cnc1C)[N+](=O)[O-])CCO.Cl (KEGG:D05016)|OCCn1c(ncc1[N+](=O)[O-])C (TTD:D0A2ZX)	OCCn1c(C)ncc1N(=O)=O	171.154	0.6152	6	DrugBank:DB00916|KEGG:D00409|KEGG:D05016|TTD:D0A2ZX	Metronidazole (DrugBank:DB00916)|Metronidazole (JP17/USP/INN) (KEGG:D00409)|Metronidazole hydrochloride (USAN) (KEGG:D05016)|Metronidazole (TTD:D0A2ZX)	Approved (DrugBank:DB00916)	443-48-1 (DrugBank:DB00916)|443-48-1 (KEGG:D00409)|69198-10-3 (KEGG:D05016)	A01AB17; A02BD01; A02BD02; A02BD03; A02BD08; A02BD11; D06BX01; G01AF01; G01AF20; J01RA03; J01RA04; J01RA10; J01XD01; P01AB01; P01AB51 (DrugBank:DB00916)|A01AB17; D06BX01; G01AF01; J01XD01; P01AB01 (KEGG:D00409)|A01AB17; D06BX01; G01AF01; J01XD01; P01AB01 (KEGG:D05016)	For the treatment of anaerobic infections and mixed infections, surgical prophylaxis requiring anaerobic coverage, Clostridium difficile-associated diarrhea and colitis, Helicobacter pylori infection and duodenal ulcer disease, bacterial vaginosis, Giardia lamblia gastro-enteritis, amebiasis caused by Entamoeba histolytica, acne rosacea (topical treatment), and Trichomonas infections. (DrugBank:D…
D-01839	S(=O)(=O)(N)c1ccc(cc1)C (TTD:D0ZC3W)	Cc1ccc(cc1)S(=O)(=O)N	171.217	2.4235	7	TTD:D0ZC3W
D-01840	S(=O)(=O)(N)Cc1ccccc1 (TTD:D07SIA)	NS(=O)(=O)Cc1ccccc1	171.217	2.2562	7	TTD:D07SIA
D-01842	NCC1(CC(O)=O)CCCCC1 (DrugBank:DB00996)|NCC1(CCCCC1)CC(=O)O (IUPHAR:5483)|C(=O)(O)CC1(CN)CCCCC1 (KEGG:D00332)|OC(=O)CC1(CCCCC1)CN (TTD:D0J0ZS)	NCC1(CCCCC1)CC(=O)O	171.237	2.0706	9	DrugBank:DB00996|IUPHAR:5483|KEGG:D00332|TTD:D0J0ZS	Gabapentin (DrugBank:DB00996)|gabapentin (IUPHAR:5483)|Gabapentin (JAN/USAN/INN) (KEGG:D00332)|Gabapentin (TTD:D0J0ZS)	Approved; Investigational (DrugBank:DB00996)|Approved (IUPHAR:5483)	60142-96-3 (DrugBank:DB00996)|60142-96-3 (KEGG:D00332)	N03AX12 (DrugBank:DB00996)|N03AX12 (KEGG:D00332)	For the management of postherpetic neuralgia in adults and as adjunctive therapy in the treatment of partial seizures with and without secondary generalization in patients over 12 years of age with epilepsy. (DrugBank:DB00996)|Synthetic organic (IUPHAR:5483)|Anticonvulsant, Antiepileptic (KEGG:D00332)|Cancer; Partial seizures (TTD:D0J0ZS)
D-01844	C#CCN[C@@H]1CCC2=CC=CC=C12 (DrugBank:DB01367)|C#CCN[C@@H]1CCc2c1cccc2 (IUPHAR:6641)|c12c(cccc1)CC[C@H]2NCC#C.O=S(=O)(C)O (KEGG:D02562)|c12c(cccc1)CC[C@H]2NCC#C (KEGG:D08469)|c12c(cccc1)CC[C@H]2NCC#C.C(=O)([C@@H]([C@H](C(=O)O)O)O)O.c12c(cccc1)CC[C@H]2NCC#C (KEGG:D10829)|N([C@@H]1CCc2c1cccc2)CC#C (TTD:D06OMW)	C#CCN[C@@H]1CCc2c1cccc2	171.238	2.2876	12	DrugBank:DB01367|IUPHAR:6641|KEGG:D02562|KEGG:D08469|KEGG:D10829|TTD:D06OMW	Rasagiline (DrugBank:DB01367)|rasagiline (IUPHAR:6641)|Rasagiline mesylate (USAN) (KEGG:D02562)|Rasagiline (USAN/INN) (KEGG:D08469)|Rasagiline tartrate (KEGG:D10829)|Rasagiline (TTD:D06OMW)	Approved (DrugBank:DB01367)|Approved (IUPHAR:6641)	136236-51-6 (DrugBank:DB01367)|161735-79-1 (KEGG:D02562)|136236-51-6 (KEGG:D08469)|136236-52-7 (KEGG:D10829)	N04BD02 (DrugBank:DB01367)|N04BD02 (KEGG:D02562)|N04BD02 (KEGG:D08469)|N04BD02 (KEGG:D10829)	For the treatment of the signs and symptoms of idiopathic Parkinsons disease as initial monotherapy and as adjunct therapy to levodopa. (DrugBank:DB01367)|Synthetic organic (IUPHAR:6641)|Antiparkinsonian, Monoamine oxidase B (MAO-B) inhibitor (KEGG:D02562)|Antiparkinsonian, Neuroprotectant, Monoamine oxidase B (MAO-B) inhibitor (KEGG:D08469)|Antiparkinsonian, Monoamine oxidase B (MAO-B) inhibitor…
D-01845	[H][C@@]1(CCC2=C1C=CC=C2)NCC#C (DrugBank:DB03894)|N([C@H]1CCc2c1cccc2)CC#C (TTD:D0K5LJ)	C#CCN[C@H]1CCc2c1cccc2	171.238	2.2876	12	DrugBank:DB03894|TTD:D0K5LJ	N-Propargyl-1(S)-Aminoindan (DrugBank:DB03894)	Experimental (DrugBank:DB03894)
D-01853	OB(O)c1cc2c(cc1)cccc2 (TTD:D0C8ZY)	OB(c1ccc2c(c1)cccc2)O	171.988	0.5196	10	TTD:D0C8ZY
D-01854	OB(O)[C@H]1N(CCC1)C(=O)CN (TTD:D04CAR)	NCC(=O)N1CCC[C@H]1B(O)O	171.99	-0.9938	6	TTD:D04CAR
D-01860	C1(=C(C(=O)C(=C(C1=O)O)O)O)O (KEGG:D06096)	OC1=C(O)C(=O)C(=C(C1=O)O)O	172.092	-0.2066	6	KEGG:D06096	Tetroquinone (USAN/INN) (KEGG:D06096)		319-89-1 (KEGG:D06096)		Keratolytic (systemic) (KEGG:D06096)
D-01868	CC1=CC(=O)C2=CC=CC=C2C1=O (DrugBank:DB00170)|c12c(C(=O)C=C(C1=O)C)cccc2 (KEGG:D02335)|O=C1c2c(C(=O)C=C1C)cccc2 (TTD:D03GET)|O=C1c2c(C(=O)C=C1C)cccc2 (TTD:D0C3XZ)|O=C1c2c(C(=O)C=C1C)cccc2 (TTD:D0T4ZM)	O=C1C=C(C)C(=O)c2c1cccc2	172.18	2.0119	11	DrugBank:DB00170|KEGG:D02335|TTD:D03GET|TTD:D0C3XZ|TTD:D0T4ZM	Menadione (DrugBank:DB00170)|Menadione (USP) (KEGG:D02335)|Menadione (TTD:D03GET)|Ascorbic acid/menadione (TTD:D0C3XZ)	Approved; Nutraceutical (DrugBank:DB00170)	58-27-5 (DrugBank:DB00170)|58-27-5 (KEGG:D02335)	B02BA02 (DrugBank:DB00170)|B02BA02 (KEGG:D02335)	The primary known function of vitamin K is to assist in the normal clotting of blood, but it may also play a role in normal bone calcification. (DrugBank:DB00170)|Hemostatic, Supplement (vitamin K) (KEGG:D02335)|Vitamin K deficiency (TTD:D03GET)|Prostate cancer (TTD:D0C3XZ)
D-01870	O=C(N)c1c2ncccc2ccc1 (TTD:D07AGU)	NC(=O)c1cccc2c1nccc2	172.183	2.034	10	TTD:D07AGU
D-01871	O=C(N(C)C)N=NC(=O)N(C)C (TTD:D0X9TG)	CN(C(=O)N=NC(=O)N(C)C)C	172.185	0.8018	6	TTD:D0X9TG
D-01875	S(=O)(=O)(Nc1ccccc1)N (TTD:D06IYU)	NS(=O)(=O)Nc1ccccc1	172.205	2.1561	6	TTD:D06IYU
D-01876	NC1=CC=C(C=C1)S(N)(=O)=O (DrugBank:DB00259)|S(=O)(=O)(c1ccc(cc1)N)N (KEGG:D08543)|S(=O)(=O)(N)c1ccc(N)cc1 (TTD:D0T8BA)	Nc1ccc(cc1)S(=O)(=O)N	172.205	2.2785	6	DrugBank:DB00259|KEGG:D08543|TTD:D0T8BA	Sulfanilamide (DrugBank:DB00259)|Sulfanilamide (INN) (KEGG:D08543)	Approved (DrugBank:DB00259)	63-74-1 (DrugBank:DB00259)|63-74-1 (KEGG:D08543)	D06BA05; G01AE10; J01EB06 (DrugBank:DB00259)|D06BA05; J01EB06 (KEGG:D08543)	For the treatment of vulvovaginitis caused by <i>Candida albicans</i>. (DrugBank:DB00259)|Antibacterial, Folic acid biosynthesis inhibitor (KEGG:D08543)
D-01877	S(=O)(=O)(N)c1cc(N)ccc1 (TTD:D0J2AE)	Nc1cccc(c1)S(=O)(=O)N	172.205	2.2785	6	TTD:D0J2AE
D-01878	S(=O)(=O)(N)c1c(N)cccc1 (TTD:D0OI1H)	Nc1ccccc1S(=O)(=O)N	172.205	2.2785	6	TTD:D0OI1H	2-Amino-benzenesulfonamide (TTD:D0OI1H)
D-01881	N1=C2N(Cc3c1cccc3)CCC2 (TTD:D0T5AW)	C1CC2=Nc3c(CN2C1)cccc3	172.226	1.6995	11	TTD:D0T5AW	Desoxypeganine (TTD:D0T5AW)				Alcohol use disorders (TTD:D0T5AW)
D-01882	[nH]1c2c(CNCC2)c2c1cccc2 (TTD:D0M7WE)	C1NCc2c(C1)[nH]c1c2cccc1	172.226	2.1424	11	TTD:D0M7WE
D-01883	n1(Cc2ccc(cc2)C)ccnc1 (TTD:D0N5GZ)	Cc1ccc(cc1)Cn1cncc1	172.226	2.2398	11	TTD:D0N5GZ
D-01885	[nH]1c2c(CCNC2)c2c1cccc2 (TTD:D03LPH)	N1CCc2c(C1)[nH]c1c2cccc1	172.226	2.1424	11	TTD:D03LPH
D-01886	n12c(CNCC1)cc1c2cccc1 (TTD:D0C1SE)	N1CCn2c(C1)cc1c2cccc1	172.226	2.0733	11	TTD:D0C1SE
D-01887	C1(=NCCN1)/C=C/c1ccccc1 (TTD:D09BIV)	c1ccc(cc1)/C=C/C1=NCCN1	172.226	1.4659	11	TTD:D09BIV
D-01892	CCCCCCCCCC(O)=O (DrugBank:DB03600)|CCCCCCCCCC(=O)O (IUPHAR:5532)|OC(=O)CCCCCCCCC (TTD:D0E7NO)	CCCCCCCCCC(=O)O	172.265	3.2117	10	DrugBank:DB03600|IUPHAR:5532|TTD:D0E7NO	Capric acid (DrugBank:DB03600)|decanoic acid (IUPHAR:5532)	Experimental (DrugBank:DB03600)	334-48-5 (DrugBank:DB03600)		Metabolite (IUPHAR:5532)
D-01896	s1c(ccc1SC)C(=N)N (TTD:D02XJW)	CSc1ccc(s1)C(=N)N	172.271	2.5541	6	TTD:D02XJW
D-01898	S1CC(N=C(N)CC1)CCC (TTD:D09BKV)	CCCC1CSCCC(=N1)N	172.291	1.7851	8	TTD:D09BKV
D-01899	S1C[C@H](N=C(N)CC1)CCC (TTD:D08PZX)	CCC[C@@H]1CSCCC(=N1)N	172.291	1.7851	8	TTD:D08PZX
D-01900	S1C[C@@H](N=C(N)CC1)CCC (TTD:D06VYU)	CCC[C@H]1CSCCC(=N1)N	172.291	1.7851	8	TTD:D06VYU
D-01902	Clc1cc(c(O)cc1)C(=O)O (TTD:D05FMD)	Clc1ccc(c(c1)C(=O)O)O	172.566	1.7438	7	TTD:D05FMD
D-01909	OC(=O)[C@@H]1CC[C@@](C1)(N)C(=O)O (IUPHAR:1365)|OC(=O)[C@@]1(N)C[C@@H](CC1)C(=O)O (TTD:D04DKM)	OC(=O)[C@@H]1CC[C@@](C1)(N)C(=O)O	173.167	0.3535	7	IUPHAR:1365|TTD:D04DKM	(1<i>S</i>,3<i>R</i>)-ACPD (IUPHAR:1365)|(1S,3R)-ACPD (TTD:D04DKM)				Synthetic organic (IUPHAR:1365)
D-01914	S(=O)(=O)(Oc1ccccc1)N (TTD:D0L4FM)	NS(=O)(=O)Oc1ccccc1	173.19	2.05	6	TTD:D0L4FM
D-01919	[H][C@@]1(O)CN2CCC[C@@]([H])(O)[C@]2([H])[C@]1([H])O (DrugBank:DB02034)|C1C[C@H]([C@H]2N(C1)C[C@H]([C@H]2O)O)O.Cl (KEGG:D06227)|N12[C@@H]([C@@H]([C@@H](C1)O)O)[C@H](O)CCC2.Cl (TTD:D0S1AD)	O[C@@H]1CN2[C@@H]([C@@H]1O)[C@H](O)CCC2	173.21	-1.515	8	DrugBank:DB02034|KEGG:D06227|TTD:D0S1AD	Tridolgosir (DrugBank:DB02034)|Tridolgosir hydrochloride (USAN) (KEGG:D06227)|Tridolgosir (TTD:D0S1AD)	Experimental (DrugBank:DB02034)	72741-87-8 (DrugBank:DB02034)|214462-68-7 (KEGG:D06227)		Antineoplastic, Chemoprotectant (KEGG:D06227)|Cancer (TTD:D0S1AD)
D-01921	O(c1c2c(c(N)cc1)cccc2)C (TTD:D0Z4JG)	COc1ccc(c2c1cccc2)N	173.211	3.0118	11	TTD:D0Z4JG
D-01923	o1c(c2ccccc2)ccc1CN (TTD:D0YQ8U)	NCc1ccc(o1)c1ccccc1	173.211	3.1056	11	TTD:D0YQ8U
D-01926	[H][C@](N)(CCCNC(C)=N)C(O)=O (DrugBank:DB03305)	CC(=N)NCCC[C@@H](C(=O)O)N	173.213	0.9562	7	DrugBank:DB03305	N5-Iminoethyl-L-Ornithine (DrugBank:DB03305)	Experimental (DrugBank:DB03305)
D-01930	n1(Cc2ccc(N)cc2)ccnc1 (TTD:D0HL9S)	Nc1ccc(cc1)Cn1cncc1	173.214	2.0948	10	TTD:D0HL9S
D-01931	n1(Cc2cc(N)ccc2)ccnc1 (TTD:D0C7YL)	Nc1cccc(c1)Cn1cncc1	173.214	2.0948	10	TTD:D0C7YL
D-01936	Fc1c([nH]c(=O)[nH]c1=O)C(=O)O (TTD:D0E2WX)	O=c1[nH]c(=O)c(c([nH]1)C(=O)O)F	174.087	-1.0995	5	TTD:D0E2WX
D-01940	OC1=CC(=O)C2=CC=CC=C2C1=O (DrugBank:DB04744)	O=C1C=C(O)C(=O)c2c1cccc2	174.153	1.5075	10	DrugBank:DB04744	Lawsone (DrugBank:DB04744)	Experimental (DrugBank:DB04744)	83-72-7 (DrugBank:DB04744)
D-01941	Oc1c2c(ccc1)C(=O)C=CC2=O (TTD:D02FPF)|Oc1c2c(ccc1)C(=O)C=CC2=O (TTD:D08PZH)|Oc1c2c(ccc1)C(=O)C=CC2=O (TTD:D0C0NH)	O=C1C=CC(=O)c2c1c(O)ccc2	174.153	1.3274	10	TTD:D02FPF|TTD:D08PZH|TTD:D0C0NH					Non-small cell lung cancer (TTD:D0C0NH)
D-01942	OC(=O)[C@@H]1NC[C@@](C1)(N)C(=O)O (IUPHAR:1392)|OC(=O)[C@@]1(N)C[C@@H](NC1)C(=O)O (TTD:D06TOD)|OC(=O)[C@@]1(N)C[C@@H](NC1)C(=O)O (TTD:D0EK6P)	OC(=O)[C@@H]1NC[C@@](C1)(N)C(=O)O	174.155	-0.7559	6	IUPHAR:1392|TTD:D06TOD|TTD:D0EK6P	(2<i>R</i>,3<i>R</i>)-APDC (IUPHAR:1392)				Synthetic organic (IUPHAR:1392)
D-01948	O(c1c2nc(N)ccc2ccc1)C (TTD:D0D2PL)	COc1cccc2c1nc(N)cc2	174.199	2.4068	10	TTD:D0D2PL
D-01953	NCC1=CC=C(O1)C1=CC=CN=C1 (DrugBank:DB07621)|NCc1ccc(o1)c1cccnc1 (IUPHAR:8754)|o1c(c2cccnc2)ccc1CN (TTD:D06QFO)	NCc1ccc(o1)c1cccnc1	174.199	2.5006	10	DrugBank:DB07621|IUPHAR:8754|TTD:D06QFO	(5-(PYRIDIN-3-YL)FURAN-2-YL)METHANAMINE (DrugBank:DB07621)|compound 39a [PMID: 15634016] (IUPHAR:8754)	Experimental (DrugBank:DB07621)			Synthetic organic (IUPHAR:8754)
D-01954	CC1=NN(C(=O)C1)C1=CC=CC=C1 (DrugBank:DB12243)|N1(c2ccccc2)C(=O)CC(=N1)C (KEGG:D01552)|O=C1N(N=C(C1)C)c1ccccc1 (TTD:D06DLI)	O=C1CC(=NN1c1ccccc1)C	174.199	1.2998	10	DrugBank:DB12243|KEGG:D01552|TTD:D06DLI	Edaravone (DrugBank:DB12243)|Edaravone (USAN/JP17/INN) (KEGG:D01552)|MCI-186 (TTD:D06DLI)	Approved; Investigational (DrugBank:DB12243)	89-25-8 (DrugBank:DB12243)|89-25-8 (KEGG:D01552)	N07XX14 (DrugBank:DB12243)|N07XX14 (KEGG:D01552)	Indicated for improving neurological symptoms and damage from acute ischemic stroke and delaying disease progression of ALS. (DrugBank:DB12243)|Cerebroprotective (KEGG:D01552)|Amyotrophic lateral sclerosis (TTD:D06DLI)
D-01957	N[C@@H](CCCNC(N)=N)C(O)=O (DrugBank:DB00125)|N[C@@H](CCC(O)=O)C(O)=O.N[C@@H](CCCNC(N)=N)C(O)=O (DrugBank:DB13207)|NC(=N)NCCC[C@@H](C(=O)O)N.Cl (KEGG:D01126)|C(CCNC(=N)N)[C@@H](C(=O)O)N.[C@H](CCC(=O)O)(C(=O)O)N (KEGG:D02397)|C(CCNC(=N)N)[C@@H](C(=O)O)N (KEGG:D02982)|C(CCNC(=N)N)[C@@H](C(=O)O)N.OC(=O)[C@H](CC(=O)O)N (KEGG:D07574)|C(=N)(NCCC[C@@H](C(=O)O)N)N (TTD:D0F5DO)	NC(=N)NCCC[C@@H](C(=O)O)N	174.201	0.5528	6	DrugBank:DB00125|DrugBank:DB13207|KEGG:D01126|KEGG:D02397|KEGG:D02982|KEGG:D07574|TTD:D0F5DO	L-Arginine (DrugBank:DB00125)|Arginine glutamate (DrugBank:DB13207)|Arginine hydrochloride (USP) (KEGG:D01126)|Arginine glutamate (USAN) (KEGG:D02397)|Arginine (USP/INN) (KEGG:D02982)|Arginine aspartate (KEGG:D07574)	Approved; Nutraceutical (DrugBank:DB00125)|Investigational (DrugBank:DB13207)	74-79-3 (DrugBank:DB00125)|4320-30-3 (DrugBank:DB13207)|1119-34-2 (KEGG:D01126)|4320-30-3 (KEGG:D02397)|74-79-3 (KEGG:D02982)|7675-83-4 (KEGG:D07574)	B05XB01 (DrugBank:DB00125)|A05BA01 (DrugBank:DB13207)|B05XB01 (KEGG:D01126)|A05BA01 (KEGG:D02397)	Used for nutritional supplementation, also for treating dietary shortage or imbalance. (DrugBank:DB00125)|Antihyperammonemic, Diagnostic agent (KEGG:D01126)|Antihyperammonemic (KEGG:D02397)|Antihyperammonemic, Diagnostic aid (pituitary function determination) (KEGG:D02982)|Supplement (amino acid) (KEGG:D07574)|Growth hormone deficiency (TTD:D0F5DO)
D-01960	OC(=O)[C@H](CCCN=C(N)N)N (IUPHAR:721)|OC(=O)[C@@H](N)CCCN=C(N)N (TTD:D0O3VV)	OC(=O)[C@H](CCCN=C(N)N)N	174.201	0.5528	6	IUPHAR:721|TTD:D0O3VV	L-arginine (IUPHAR:721)|L-arginine (TTD:D0O3VV)				Metabolite (IUPHAR:721)
D-01965	CC(N)CC1=CNC2=CC=CC=C12 (DrugBank:DB01446)	CC(Cc1c[nH]c2c1cccc2)N	174.242	2.7579	11	DrugBank:DB01446	Indopan (DrugBank:DB01446)	Experimental; Illicit (DrugBank:DB01446)	299-26-3 (DrugBank:DB01446)
D-01967	N1C(=NCC1)CCc1ccccc1 (TTD:D0Z7NC)	c1ccc(cc1)CCC1=NCCN1	174.242	1.3853	11	TTD:D0Z7NC
D-01969	O[C@@H]1C[C@H](O[C@H]1C)C[N+](C)(C)C (IUPHAR:3996)|O1[C@H](C[N+](C)(C)C)C[C@@H](O)[C@@H]1C (TTD:D0H4BJ)	O[C@@H]1C[C@H](O[C@H]1C)C[N+](C)(C)C	174.261	0.2309	9	IUPHAR:3996|TTD:D0H4BJ	muscarine (IUPHAR:3996)				Natural product (IUPHAR:3996)
D-01972	OB(CCCC[C@@H](C(=O)O)N)O (IUPHAR:5107)|OC(=O)[C@@H](N)CCCCB(O)O (TTD:D08PUJ)	OB(CCCC[C@@H](C(=O)O)N)O	174.991	-0.2583	6	IUPHAR:5107|TTD:D08PUJ	2(<i>S</i>)-amino-6-boronohexanoic acid (IUPHAR:5107)				Synthetic organic (IUPHAR:5107)
D-01978	O=C1c2c(C(=O)NC1=O)cccc2 (TTD:D0V6DX)	O=C1NC(=O)C(=O)c2c1cccc2	175.141	0.4681	9	TTD:D0V6DX
D-01980	NS(=O)(=O)C1=CC=C(F)C=C1 (DrugBank:DB01784)|S(=O)(=O)(N)c1ccc(F)cc1 (TTD:D00SJT)	Fc1ccc(cc1)S(=O)(=O)N	175.181	2.2542	6	DrugBank:DB01784|TTD:D00SJT	4-Flourobenzenesulfonamide (DrugBank:DB01784)	Experimental (DrugBank:DB01784)
D-01987	O[C@H]1[C@H]2CC[C@](O)(N2)[C@@H](O)[C@@H]1O (DrugBank:DB04658)|O[C@@]12N[C@H](CC2)[C@H](O)[C@@H](O)[C@@H]1O (TTD:D0S4DV)	O[C@H]1[C@H]2CC[C@](N2)([C@H]([C@@H]1O)O)O	175.182	-2.1479	7	DrugBank:DB04658|TTD:D0S4DV	(1S,2R,3S,4R,5S)-8-AZABICYCLO[3.2.1]OCTANE-1,2,3,4-TETROL (DrugBank:DB04658)	Experimental (DrugBank:DB04658)
D-01988	o1c2c(cc(cc2)CN)ccc1=O (TTD:D0N1AW)	NCc1ccc2c(c1)ccc(=O)o2	175.184	1.952	10	TTD:D0N1AW
D-01989	CC1=CC(=O)OC2=C1C=CC(N)=C2 (DrugBank:DB08168)|o1c2c(c(cc1=O)C)ccc(N)c2 (TTD:D0L5XK)	Nc1ccc2c(c1)oc(=O)cc2C	175.184	2.2648	10	DrugBank:DB08168|TTD:D0L5XK	7-AMINO-4-METHYL-CHROMEN-2-ONE (DrugBank:DB08168)	Experimental (DrugBank:DB08168)
D-01992	N[C@@H](CCCNC(N)=O)C(O)=O (DrugBank:DB00155)|NC(=O)NCCC[C@@H](C(=O)O)N (IUPHAR:722)|C(CCNC(=O)N)[C@@H](C(=O)O)N (KEGG:D07706)|C(CCNC(=O)N)[C@@H](C(=O)O)N.OC(=O)C(CC(=O)O)O (KEGG:D07707)|OC(=O)[C@@H](N)CCCNC(=O)N (TTD:D01XPY)	NC(=O)NCCC[C@@H](C(=O)O)N	175.186	0.6383	6	DrugBank:DB00155|IUPHAR:722|KEGG:D07706|KEGG:D07707|TTD:D01XPY	L-Citrulline (DrugBank:DB00155)|L-citrulline (IUPHAR:722)|L-Citrulline (DCF) (KEGG:D07706)|Citrulline malate (KEGG:D07707)	Approved; Investigational; Nutraceutical (DrugBank:DB00155)	372-75-8 (DrugBank:DB00155)|372-75-8 (KEGG:D07706)|54940-97-5 (KEGG:D07707)		Used for nutritional supplementation, also for treating dietary shortage or imbalance. (DrugBank:DB00155)|Synthetic organic (IUPHAR:722)|Hepatoprotectant (KEGG:D07706)|Hepatoprotectant (KEGG:D07707)
D-01997	n1(C2CC2)c2ncnc(N)c2nc1 (TTD:D0OR5V)	Nc1ncnc2c1ncn2C1CC1	175.191	1.3246	8	TTD:D0OR5V
D-01998	O[C@H]1[C@H](NC[C@@H](O)[C@@H]1O)CCC (TTD:D06YQR)	CCC[C@H]1NC[C@H]([C@@H]([C@H]1O)O)O	175.225	-0.8302	8	TTD:D06YQR
D-02002	[nH]1c2c(cc(nc2nc1CC)C)C (TTD:D03KLO)	CCc1nc2c([nH]1)c(C)cc(n2)C	175.23	2.1371	10	TTD:D03KLO
D-02006	NC(=N)N1CCC2=CC=CC=C2C1 (DrugBank:DB04840)|c1ccc2c(c1)CN(CC2)C(=N)N.S(=O)(=O)(O)O.c1ccc2c(c1)CN(CC2)C(=N)N (KEGG:D03664)|N1(CCc2c(C1)cccc2)C(=N)N (TTD:D0MP5H)	NC(=N)N1CCc2c(C1)cccc2	175.23	1.6761	10	DrugBank:DB04840|KEGG:D03664|TTD:D0MP5H	Debrisoquine (DrugBank:DB04840)|Debrisoquin sulfate (USAN) (KEGG:D03664)|Debrisoquin (TTD:D0MP5H)	Approved; Investigational (DrugBank:DB04840)	1131-64-2 (DrugBank:DB04840)|581-88-4 (KEGG:D03664)	C02CC04 (DrugBank:DB04840)|C02CC04 (KEGG:D03664)	For the treatment of moderate and severe hypertension, either alone or as an adjunct, and for the treatment of renal hypertension. (DrugBank:DB04840)|Antihypertensive (KEGG:D03664)|Hypertension (TTD:D0MP5H)
D-02008	s1c(c(cc1)C)c1cccnc1 (TTD:D06TRS)	Cc1ccsc1c1cccnc1	175.25	3.1185	10	TTD:D06TRS
D-02019	[H][C@@]1(OC(=O)C(O)=C1O)[C@@H](O)CO (DrugBank:DB00126)|[Fe++].[H][C@](O)(CO)[C@@]1([H])OC(=O)C(O)=C1O.[H][C@](O)(CO)[C@@]1([H])OC(=O)C([O-])=C1[O-] (DrugBank:DB14490)|OC[C@@H]([C@H]1OC(=O)C(=C1O)O)O (IUPHAR:4532)|OC[C@@H]([C@H]1OC(=O)C(=C1O)O)O (IUPHAR:4781)|[C@H]1(C(=C(C(=O)O1)O)O)[C@H](CO)O (KEGG:D00018)|O1[C@H]([C@@H](O)CO)C(=C(O)C1=O)O (TTD:D07AHW)|O1[C@H]([C@@H](O)CO)C(=C(O)C1=O)O (TTD:D0U4…	OC[C@@H]([C@H]1OC(=O)C(=C1O)O)O	176.124	-1.4074	6	DrugBank:DB00126|DrugBank:DB14490|IUPHAR:4532|IUPHAR:4781|KEGG:D00018|TTD:D07AHW|TTD:D0U4HT	Ascorbic acid (DrugBank:DB00126)|Ferrous ascorbate (DrugBank:DB14490)|[<sup>14</sup>C]ascorbic acid (IUPHAR:4532)|L-ascorbic acid (IUPHAR:4781)|Ascorbic acid (JP17/USP/INN) (KEGG:D00018)|Vitamin C (TTD:D07AHW)|[14C]ascorbic acid (TTD:D0U4HT)	Approved; Nutraceutical (DrugBank:DB00126)|Approved (DrugBank:DB14490)|Labelled; Radioactive (IUPHAR:4532)	50-81-7 (DrugBank:DB00126)|24808-52-4 (DrugBank:DB14490)|50-81-7 (KEGG:D00018)	A11GA01; A11GB01; G01AD03; S01XA15 (DrugBank:DB00126)|B03AA10 (DrugBank:DB14490)|A11GA01; G01AD03; S01XA15 (KEGG:D00018)	Used to treat vitamin C deficiency, scurvy, delayed wound and bone healing, urine acidification, and in general as an antioxidant. It has also been suggested to be an effective antiviral agent. (DrugBank:DB00126)|Used in preventing and treating iron-deficiency anemia. (DrugBank:DB14490)|Metabolite (IUPHAR:4532)|Metabolite (IUPHAR:4781)|Antiscorbutic, Supplement (vitamin C) (KEGG:D00018)|Urinary t…
D-02027	o1c2c(ccc(OC)c2)ccc1=O (TTD:D0U4BB)	COc1ccc2c(c1)oc(=O)cc2	176.169	1.8016	10	TTD:D0U4BB
D-02029	o1c2c(cc(cc2)CO)ccc1=O (TTD:D0L5TZ)	OCc1ccc2c(c1)ccc(=O)o2	176.169	1.2853	10	TTD:D0L5TZ
D-02030	CC1=CC(=O)OC2=C1C=CC(O)=C2 (DrugBank:DB07118)|c12c(c(cc(=O)o1)C)ccc(c2)O (KEGG:D00170)	Oc1ccc2c(c1)oc(=O)cc2C	176.169	1.807	10	DrugBank:DB07118|KEGG:D00170	Hymecromone (DrugBank:DB07118)|Hymecromone (JP17/USAN/INN) (KEGG:D00170)	Experimental; Investigational (DrugBank:DB07118)	90-33-5 (DrugBank:DB07118)|90-33-5 (KEGG:D00170)	A05AX02 (DrugBank:DB07118)|A05AX02 (KEGG:D00170)	Choleretic (KEGG:D00170)
D-02032	CC1=NC2=C(C=CC=C2O)C(=O)N1 (DrugBank:DB02690)	Cc1nc2c(O)cccc2c(=O)[nH]1	176.172	0.9371	9	DrugBank:DB02690	NU1025 (DrugBank:DB02690)	Experimental (DrugBank:DB02690)	90417-38-2 (DrugBank:DB02690)
D-02033	NC1=NC(=O)C(O1)C1=CC=CC=C1 (DrugBank:DB01230)|C1(OC(=NC1=O)N)c1ccccc1 (KEGG:D00744)|N1=C(OC(C1=O)c1ccccc1)N (TTD:D0D5GG)	O=C1N=C(OC1c1ccccc1)N	176.172	0.7351	9	DrugBank:DB01230|KEGG:D00744|TTD:D0D5GG	Pemoline (DrugBank:DB01230)|Pemoline (JAN/USAN/INN) (KEGG:D00744)	Approved; Illicit; Investigational; Withdrawn (DrugBank:DB01230)	2152-34-3 (DrugBank:DB01230)|2152-34-3 (KEGG:D00744)	N06BA05 (DrugBank:DB01230)|N06BA05 (KEGG:D00744)	For treatment of Attention Deficit Hyperactivity Disorder (ADHD) (DrugBank:DB01230)|Antidepressant, Sedative-hypnotic, Stimulant (central) (KEGG:D00744)|Attention deficit hyperactivity disorder (TTD:D0D5GG)
D-02041	C1CC2=C(C1)C(=NN2)C1=NNN=N1 (DrugBank:DB05939)|n1[nH]nc(n1)c1n[nH]c2c1CCC2 (IUPHAR:5784)|[nH]1nc(c2CCCc12)c1n[nH]nn1 (TTD:D0A5MR)	n1[nH]nc(n1)c1n[nH]c2c1CCC2	176.179	0.0785	7	DrugBank:DB05939|IUPHAR:5784|TTD:D0A5MR	MK-0354 (DrugBank:DB05939)|MK 0354 (IUPHAR:5784)	Investigational (DrugBank:DB05939)	851776-28-8 (DrugBank:DB05939)		Investigated for use/treatment in atherosclerosis. (DrugBank:DB05939)|Synthetic organic (IUPHAR:5784)
D-02043	Fc1ccc(Cn2ccnc2)cc1 (TTD:D05QPR)	Fc1ccc(cc1)Cn1cncc1	176.19	2.0705	10	TTD:D05QPR
D-02044	Fc1cc(Cn2ccnc2)ccc1 (TTD:D08HHA)	Fc1cccc(c1)Cn1cncc1	176.19	2.0705	10	TTD:D08HHA
D-02047	O(c1ccc(C2=NCCN2)cc1)C (TTD:D0K8SK)	COc1ccc(cc1)C1=NCCN1	176.215	0.8094	10	TTD:D0K8SK
D-02048	O(c1cc2c(c[nH]c2cc1)CN)C (TTD:D0O7MW)	COc1ccc2c(c1)c(CN)c[nH]2	176.215	2.3355	10	TTD:D0O7MW
D-02049	NCCC1=CNC2=CC=C(O)C=C12 (DrugBank:DB08839)|NCCc1c[nH]c2c1cc(O)cc2 (IUPHAR:5)|Oc1cc2c(CCN)c[nH]c2cc1 (TTD:D0F6CD)	NCCc1c[nH]c2c1cc(O)cc2	176.215	2.075	10	DrugBank:DB08839|IUPHAR:5|TTD:D0F6CD	Serotonin (DrugBank:DB08839)|5-hydroxytryptamine (IUPHAR:5)	Investigational; Nutraceutical (DrugBank:DB08839)	50-67-9 (DrugBank:DB08839)		Metabolite (IUPHAR:5)
D-02052	O(CC1=NCCN1)c1ccccc1 (TTD:D0N9FH)	c1ccc(cc1)OCC1=NCCN1	176.215	0.8315	10	TTD:D0N9FH
D-02055	N1(CCCC1)CCc1ccncc1 (TTD:D0B6CA)	C1CCN(C1)CCc1ccncc1	176.258	1.6578	11	TTD:D0B6CA
D-02057	S1CN(CC1)C(=S)[C@@H](N)C (TTD:D0L5RI)	S=C(N1CSCC1)[C@@H](N)C	176.303	1.3055	6	TTD:D0L5RI
D-02061	OC(=O)[C@H]1CC(=C(F)F)[C@H](C1)N (IUPHAR:8284)	OC(=O)[C@H]1CC(=C(F)F)[C@H](C1)N	177.149	1.6592	7	IUPHAR:8284	CPP-115 (IUPHAR:8284)				Synthetic organic (IUPHAR:8284)
D-02062	ON1C(=O)Cc2c(C1=O)cccc2 (TTD:D05SSB)	O=C1Cc2ccccc2C(=O)N1O	177.157	0.5386	9	TTD:D05SSB
D-02071	n1(CCC)c2ncnc(N)c2nc1 (TTD:D04WHE)	CCCn1cnc2c1ncnc2N	177.206	1.3997	8	TTD:D04WHE
D-02075	n1(C(C)C)c2ncnc(N)c2nc1 (TTD:D0DB7A)	Nc1ncnc2c1ncn2C(C)C	177.206	1.5706	8	TTD:D0DB7A
D-02082	CCNC(C(=O)c1ccccc1)C (IUPHAR:7398)|O=C(C(NCC)C)c1ccccc1 (TTD:D0HF1N)	CCNC(C(=O)c1ccccc1)C	177.243	2.2582	11	IUPHAR:7398|TTD:D0HF1N	ethcathinone (IUPHAR:7398)|ethcathinone (TTD:D0HF1N)				Synthetic organic (IUPHAR:7398)
D-02083	CNC(C)C(=O)C1=CC=C(C)C=C1 (DrugBank:DB13108)	CNC(C(=O)c1ccc(cc1)C)C	177.243	2.1765	11	DrugBank:DB13108	Mephedrone (DrugBank:DB13108)	Investigational (DrugBank:DB13108)	1189805-46-6 (DrugBank:DB13108)
D-02086	O1C(CCC1c1ccccc1)CN (TTD:D0N0TQ)	NCC1CCC(O1)c1ccccc1	177.243	2.5657	11	TTD:D0N0TQ
D-02091	NC(=[NH2+])C1=CC2=C(S1)C=CC=C2 (DrugBank:DB04446)	NC(=[NH2+])c1cc2c(s1)cccc2	177.246	1.066	9	DrugBank:DB04446	Benzo[B]Thiophene-2-Carboxamidine (DrugBank:DB04446)	Experimental (DrugBank:DB04446)
D-02092	NCc1cccc(c1)C/N=C(/N)\C (IUPHAR:5102)|N(=C(\N)/C)/Cc1cc(CN)ccc1 (TTD:D06JDW)|N(=C(\N)/C)/Cc1cc(CN)ccc1 (TTD:D0AO5D)|N(=C(\N)/C)/Cc1cc(CN)ccc1 (TTD:D0F3MJ)	NCc1cccc(c1)C/N=C(/N)\C	177.246	2.423	10	IUPHAR:5102|TTD:D06JDW|TTD:D0AO5D|TTD:D0F3MJ	1400W (IUPHAR:5102)|1400W (TTD:D0AO5D)				Synthetic organic (IUPHAR:5102)
D-02093	CC(=N)NCC1=CC=CC(CN)=C1 (DrugBank:DB02044)	NCc1cccc(c1)CNC(=N)C	177.246	2.423	10	DrugBank:DB02044	N-(3-(Aminomethyl)Benzyl)Acetamidine (DrugBank:DB02044)	Experimental (DrugBank:DB02044)
D-02095	S=C=NCCCCS(=O)C (IUPHAR:6569)	S=C=NCCCCS(=O)C	177.288	2.1136	6	IUPHAR:6569	sulforaphane (IUPHAR:6569)				Natural product (IUPHAR:6569)
D-02098	OB(O)C1=CC2=C(S1)C=CC=C2 (DrugBank:DB04360)|s1c2c(cc1B(O)O)cccc2 (TTD:D04BWH)|s1c2c(cc1B(O)O)cccc2 (TTD:D0YL3P)	OB(c1cc2c(s1)cccc2)O	178.016	0.5811	8	DrugBank:DB04360|TTD:D04BWH|TTD:D0YL3P	Benzo[B]Thiophene-2-Boronic Acid (DrugBank:DB04360)	Experimental (DrugBank:DB04360)
D-02099	OB(O)c1ccc(CCCC)cc1 (TTD:D05NFU)	CCCCc1ccc(cc1)B(O)O	178.036	0.709	10	TTD:D05NFU
D-02104	O=c1ccc2c(o1)cc(c(c2)O)O (IUPHAR:5180)|o1c2c(cc(O)c(O)c2)ccc1=O (TTD:D0YZ5G)	O=c1ccc2c(o1)cc(c(c2)O)O	178.142	1.2042	9	IUPHAR:5180|TTD:D0YZ5G	esculetin (IUPHAR:5180)|esculetin (TTD:D0YZ5G)				Natural product (IUPHAR:5180)
D-02105	On1c(=O)c2c([nH]c1=O)cccc2 (TTD:D0NS0E)	On1c(=O)[nH]c2c(c1=O)cccc2	178.145	-0.0729	8	TTD:D0NS0E
D-02115	O=C1[C@@H](N)Cc2c(N1O)cccc2 (IUPHAR:9038)	O=C1[C@@H](N)Cc2c(N1O)cccc2	178.188	1.0575	9	IUPHAR:9038	PF-04859989 (IUPHAR:9038)				Synthetic organic (IUPHAR:9038)
D-02116	[O-][N+](=O)c1cc2c(CCNC2)cc1 (TTD:D01SRL)	O=N(=O)c1ccc2c(c1)CNCC2	178.188	2.0925	9	TTD:D01SRL
D-02118	NCCc1c[nH]c2c1cc(F)cc2 (IUPHAR:146)|Fc1cc2c(CCN)c[nH]c2cc1 (TTD:D05DAG)|Fc1cc2c(CCN)c[nH]c2cc1 (TTD:D07AXM)	NCCc1c[nH]c2c1cc(F)cc2	178.206	2.5085	10	IUPHAR:146|TTD:D05DAG|TTD:D07AXM	5-fluorotryptamine (IUPHAR:146)				Synthetic organic (IUPHAR:146)
D-02119	SCC(CCC(=O)O)C(=O)O (TTD:D0E0HK)	SCC(C(=O)O)CCC(=O)O	178.206	0.4818	6	TTD:D0E0HK
D-02124	C1(NS(=O)(=O)[O-])CCCCC1.[Na+] (KEGG:D02443)|C1(NS(=O)(=O)[O-])CCCCC1.[Ca+2].C1(NS(=O)(=O)[O-])CCCCC1 (KEGG:D02444)	[O-]S(=O)(=O)NC1CCCCC1	178.229	1.8406	6	KEGG:D02443|KEGG:D02444	Sodium cyclamate (INN) (KEGG:D02443)|Calcium cyclamate (KEGG:D02444)		139-05-9 (KEGG:D02443)|139-06-0 (KEGG:D02444)		Sweetener (non-nutritive) (KEGG:D02443)|Sweetener (non-nutritive) (KEGG:D02444)
D-02131	CC(C)C1=CC=CC(C(C)C)=C1O (DrugBank:DB00818)|CC(c1cccc(c1O)C(C)C)C (IUPHAR:5464)|c1(c(c(C(C)C)ccc1)O)C(C)C (KEGG:D00549)|Oc1c(C(C)C)cccc1C(C)C (TTD:D0A3HB)	CC(c1cccc(c1O)C(C)C)C	178.271	3.639	12	DrugBank:DB00818|IUPHAR:5464|KEGG:D00549|TTD:D0A3HB	Propofol (DrugBank:DB00818)|propofol (IUPHAR:5464)|Propofol (JAN/USAN/INN) (KEGG:D00549)|Propofol (TTD:D0A3HB)	Approved; Investigational; Vet_approved (DrugBank:DB00818)|Approved (IUPHAR:5464)	2078-54-8 (DrugBank:DB00818)|2078-54-8 (KEGG:D00549)	N01AX10 (DrugBank:DB00818)|N01AX10 (KEGG:D00549)	Used for induction and/or maintenance of anaesthesia and for management of refractory status epilepticus. (DrugBank:DB00818)|Synthetic organic (IUPHAR:5464)|Anesthetic (intravenous), GABA-A receptor agonist (KEGG:D00549)|Anesthesia; Unspecified (TTD:D0A3HB)
D-02135	ClC1=NO[C@@H](C1)[C@@H](C(=O)O)N (KEGG:D02755)|ClC1=NO[C@H]([C@H](N)C(=O)O)C1 (TTD:D02JUT)	N[C@H](C(=O)O)[C@@H]1CC(=NO1)Cl	178.574	-0.1246	5	KEGG:D02755|TTD:D02JUT	Acivicin (USAN/INN) (KEGG:D02755)		42228-92-2 (KEGG:D02755)		Antineoplastic, Antimetabolite (KEGG:D02755)
D-02148	NC(=N)NC1=CC=C(C=C1)C(O)=O (DrugBank:DB02459)	NC(=N)Nc1ccc(cc1)C(=O)O	179.176	1.5632	8	DrugBank:DB02459	4-Guanidinobenzoic Acid (DrugBank:DB02459)	Experimental (DrugBank:DB02459)
D-02157	CC(N)CC1=CC2=C(OCO2)C=C1 (DrugBank:DB01509)|O1c2cc(CC(N)C)ccc2OC1 (TTD:D02TMK)	CC(Cc1ccc2c(c1)OCO2)N	179.216	2.0053	10	DrugBank:DB01509|TTD:D02TMK	Tenamfetamine (DrugBank:DB01509)	Experimental; Illicit (DrugBank:DB01509)	4764-17-4 (DrugBank:DB01509)
D-02158	Oc1cc2C(NCCc2cc1O)C (TTD:D04JUJ)	CC1NCCc2c1cc(O)c(c2)O	179.216	1.6333	10	TTD:D04JUJ
D-02161	CN1CC(=CCC1)C(=O)OCC#C (IUPHAR:295)|O(C(=O)C1=CCCN(C1)C)CC#C (TTD:D0I9LU)	CN1CC(=CCC1)C(=O)OCC#C	179.216	0.3626	10	IUPHAR:295|TTD:D0I9LU	arecaidine propargyl ester (IUPHAR:295)				Synthetic organic (IUPHAR:295)
D-02166	NC1CCc2c(C1)cc(c(c2)O)O (IUPHAR:932)|Oc1cc2CC(N)CCc2cc1O (TTD:D0X2NO)	NC1CCc2c(C1)cc(c(c2)O)O	179.216	1.6141	10	IUPHAR:932|TTD:D0X2NO	(+)-ADTN (IUPHAR:932)|(+)-ADTN (TTD:D0X2NO)				Synthetic organic (IUPHAR:932)
D-02171	O=C(NO)CCCc1ccccc1 (TTD:D02NWS)	ONC(=O)CCCc1ccccc1	179.216	1.9056	10	TTD:D02NWS
D-02172	CC(C)NNC(=O)C1=CC=NC=C1 (DrugBank:DB04818)|c1(C(=O)NNC(C)C)ccncc1 (KEGG:D02579)|c1(C(=O)NNC(C)C)ccncc1.P(=O)(O)(O)O (KEGG:D08085)|O=C(NNC(C)C)c1ccncc1 (TTD:D08CNS)	CC(NNC(=O)c1ccncc1)C	179.219	1.5062	9	DrugBank:DB04818|KEGG:D02579|KEGG:D08085|TTD:D08CNS	Iproniazid (DrugBank:DB04818)|Iproniazid (INN) (KEGG:D02579)|Iproniazid phosphate (KEGG:D08085)	Withdrawn (DrugBank:DB04818)	54-92-2 (DrugBank:DB04818)|54-92-2 (KEGG:D02579)|305-33-9 (KEGG:D08085)	N06AF05 (KEGG:D02579)|N06AF05 (KEGG:D08085)	For the treatment of depression (originally intended to treat tuberculosis). (DrugBank:DB04818)|Antibacterial (tuberculostatic), Antidepressant, Monoamine oxidase (MAO) inhibitor (KEGG:D02579)|Antidepressant, Monoamine oxidase (MAO) inhibitor (KEGG:D08085)
D-02178	CC(N)COC1=C(C)C=CC=C1C (DrugBank:DB00379)|CC(COc1c(C)cccc1C)N (IUPHAR:2629)|c1(c(cccc1C)C)OCC(C)N.Cl (KEGG:D00639)|c1(c(cccc1C)C)OCC(C)N (KEGG:D08215)|O(CC(N)C)c1c(cccc1C)C (TTD:D0X0RI)	CC(COc1c(C)cccc1C)N	179.259	2.7297	11	DrugBank:DB00379|IUPHAR:2629|KEGG:D00639|KEGG:D08215|TTD:D0X0RI	Mexiletine (DrugBank:DB00379)|mexiletine (IUPHAR:2629)|Mexiletine hydrochloride (JP17/USP) (KEGG:D00639)|Mexiletine (INN) (KEGG:D08215)|Mexiletine (TTD:D0X0RI)	Approved; Investigational (DrugBank:DB00379)|Approved (IUPHAR:2629)	31828-71-4 (DrugBank:DB00379)|5370-01-4 (KEGG:D00639)|31828-71-4 (KEGG:D08215)	C01BB02 (DrugBank:DB00379)|C01BB02 (KEGG:D00639)|C01BB02 (KEGG:D08215)	For the treatment of ventricular tachycardia and symptomatic premature ventricular beats, and prevention of ventricular fibrillation. (DrugBank:DB00379)|Synthetic organic (IUPHAR:2629)|Antiarrhythmic, Antihypertensive, Sodium channel blocker (KEGG:D00639)|Antiarrhythmic, Sodium channel blocker (KEGG:D08215)|Symptomatic premature ventricular beats; Ventricular fibrillation; Ventricular tachycardia…
D-02185	CN1CCC(CC1)Cc1[nH]cnc1 (IUPHAR:1254)|N1(CCC(CC1)Cc1[nH]cnc1)C (TTD:D05RGW)	CN1CCC(CC1)Cc1[nH]cnc1	179.262	1.2319	10	IUPHAR:1254|TTD:D05RGW	methimepip (IUPHAR:1254)				Synthetic organic (IUPHAR:1254)
D-02187	CC(N)C12CC3CC(CC(C3)C1)C2 (DrugBank:DB00478)|C12(C(C)N)CC3CC(C1)CC(C2)C3.Cl (KEGG:D00901)|C12(C(C)N)CC3CC(C1)CC(C2)C3 (KEGG:D08483)|Cl.NC(C12CC3CC(C2)CC(C1)C3)C (TTD:D0P2NN)|NC(C12CC3CC(C2)CC(C1)C3)C (TTD:D0TQ1G)	CC(C12CC3CC(C2)CC(C1)C3)N	179.302	3.2503	12	DrugBank:DB00478|KEGG:D00901|KEGG:D08483|TTD:D0P2NN|TTD:D0TQ1G	Rimantadine (DrugBank:DB00478)|Rimantadine hydrochloride (USAN) (KEGG:D00901)|Rimantadine (INN) (KEGG:D08483)|Rimantadine (TTD:D0TQ1G)	Approved; Investigational (DrugBank:DB00478)	13392-28-4 (DrugBank:DB00478)|1501-84-4 (KEGG:D00901)|13392-28-4 (KEGG:D08483)	J05AC02 (DrugBank:DB00478)|J05AC02 (KEGG:D00901)|J05AC02 (KEGG:D08483)	For the prophylaxis and treatment of illness caused by various strains of influenza A virus in adults. (DrugBank:DB00478)|Antiviral, M2 protein inhibitor (KEGG:D00901)|Antiviral, M2 protein inhibitor (KEGG:D08483)|Influenza A infection (TTD:D0TQ1G)
D-02188	CC12CC3CC(C)(C1)CC(N)(C3)C2 (DrugBank:DB01043)|CC12CC3CC(C1)(C)CC(C2)(C3)N (IUPHAR:4253)|C1C2(CC3(CC1(N)CC(C2)C3)C)C.Cl (KEGG:D04905)|C1C2(CC3(CC1(N)CC(C2)C3)C)C (KEGG:D08174)|NC12CC3(CC(C1)(CC(C3)C2)C)C (TTD:D01JEU)	CC12CC3CC(C1)(C)CC(C2)(C3)N	179.302	3.3944	12	DrugBank:DB01043|IUPHAR:4253|KEGG:D04905|KEGG:D08174|TTD:D01JEU	Memantine (DrugBank:DB01043)|memantine (IUPHAR:4253)|Memantine hydrochloride (JAN/USAN) (KEGG:D04905)|Memantine (INN) (KEGG:D08174)|Memantine (TTD:D01JEU)	Approved; Investigational (DrugBank:DB01043)|Approved (IUPHAR:4253)	19982-08-2 (DrugBank:DB01043)|41100-52-1 (KEGG:D04905)|19982-08-2 (KEGG:D08174)	N06DA52; N06DA53; N06DX01 (DrugBank:DB01043)|N06DX01 (KEGG:D04905)|N06DX01 (KEGG:D08174)	For the treatment of moderate to severe dementia of the Alzheimer's type. (DrugBank:DB01043)|Synthetic organic (IUPHAR:4253)|Dementia therapeutic agent, NMDA receptor antagonist (KEGG:D04905)|Dementia therapeutic agent, NMDA receptor antagonist (KEGG:D08174)|Alzheimer disease (TTD:D01JEU)
D-02191	c1cc(c2c(c1O)nccc2)Cl (KEGG:D03572)	Clc1ccc(c2c1cccn2)O	179.603	2.5938	9	KEGG:D03572	Cloxyquin (USAN) (KEGG:D03572)		130-16-5 (KEGG:D03572)		Antibacterial (KEGG:D03572)
D-02219	CC(=O)OC1=CC=CC=C1C(O)=O (DrugBank:DB00945)|[O--].[O--].[O--].[Al+3].[Al+3].CC(=O)OC1=CC=CC=C1C(O)=O (DrugBank:DB13509)|CC(=O)Oc1ccccc1C(=O)O (IUPHAR:4139)|c1(c(cccc1)OC(=O)C)C(=O)O (KEGG:D00109)|O(c1c(cccc1)C(=O)O)C(=O)C (TTD:D07DPI)|O(c1c(cccc1)C(=O)O)C(=O)C (TTD:D0GY5Z)|O(c1c(cccc1)C(=O)O)C(=O)C (TTD:D0XB8R)	CC(=O)Oc1ccccc1C(=O)O	180.157	1.3101	9	DrugBank:DB00945|DrugBank:DB13509|IUPHAR:4139|KEGG:D00109|TTD:D07DPI|TTD:D0GY5Z|TTD:D0XB8R	Acetylsalicylic acid (DrugBank:DB00945)|Aloxiprin (DrugBank:DB13509)|aspirin (IUPHAR:4139)|Aspirin (JP17/USP) (KEGG:D00109)|Aspirin/ esomeprazole fixed-dose combination (TTD:D07DPI)	Approved; Vet_approved (DrugBank:DB00945)|Experimental (DrugBank:DB13509)|Approved (IUPHAR:4139)	50-78-2 (DrugBank:DB00945)|9014-67-9 (DrugBank:DB13509)|50-78-2 (KEGG:D00109)	A01AD05; B01AC06; B01AC56; C07FX02; C07FX03; C07FX04; C10BX01; C10BX02; C10BX04; C10BX05; C10BX06; C10BX08; C10BX12; M01BA03; N02AJ02; N02AJ07; N02AJ18; N02BA01; N02BA51; N02BA71 (DrugBank:DB00945)|B01AC15; N02BA02 (DrugBank:DB13509)|A01AD05; B01AC06; N02BA01 (KEGG:D00109)	For use in the temporary relief of various forms of pain, inflammation associated with various conditions (including rheumatoid arthritis, juvenile rheumatoid arthritis, systemic lupus erythematosus, osteoarthritis, and ankylosing spondylitis), and is also used to reduce the risk of death and/or nonfatal myocardial infarction in patients with a previous infarction or unstable angina pectoris. (Dr…
D-02220	O(c1c(cccc1)C=O)CC(=O)O (TTD:D0J2PW)	O=Cc1ccccc1OCC(=O)O	180.157	0.9625	9	TTD:D0J2PW
D-02221	OC(=O)\C=C\C1=CC(O)=C(O)C=C1 (DrugBank:DB01880)|OC(=O)/C=C/c1ccc(c(c1)O)O (IUPHAR:5155)|Oc1cc(ccc1O)/C=C/C(=O)O (TTD:D00HIB)|Oc1cc(ccc1O)/C=C/C(=O)O (TTD:D0V9EN)	OC(=O)/C=C/c1ccc(c(c1)O)O	180.157	1.1956	9	DrugBank:DB01880|IUPHAR:5155|TTD:D00HIB|TTD:D0V9EN	3,4-Dihydroxycinnamic Acid (DrugBank:DB01880)|caffeic acid (IUPHAR:5155)	Experimental; Investigational (DrugBank:DB01880)	331-39-5 (DrugBank:DB01880)		Natural product (IUPHAR:5155)
D-02225	CN1C2=C(NC=N2)C(=O)N(C)C1=O (DrugBank:DB00277)|NCCN.CN1C2=C(NC=N2)C(=O)N(C)C1=O.CN1C2=C(NC=N2)C(=O)N(C)C1=O (DrugBank:DB01223)|Cn1c(=O)n(C)c2c(c1=O)[nH]cn2 (IUPHAR:413)|c12c(n(c(=O)n(c1=O)C)C)nc[nH]2.C(CN)N.c12c(n(c(=O)n(c1=O)C)C)nc[nH]2 (KEGG:D00227)|c12c(n(c(=O)n(c1=O)C)C)nc[nH]2 (KEGG:D00371)|CC(=O)[O-].c12c(n(c(=O)n(c1=O)C)C)nc[nH]2.[Na+] (KEGG:D01712)|c12c(n(c(=O)n(c1=O)C)C)nc[nH]2.CC(CO)(N)…	Cn1c(=O)n(C)c2c(c1=O)[nH]cn2	180.164	-1.0397	7	DrugBank:DB00277|DrugBank:DB01223|IUPHAR:413|KEGG:D00227|KEGG:D00371|KEGG:D01712|KEGG:D02884|KEGG:D04374|KEGG:D05429|KEGG:D06103|KEGG:D06104|TTD:D03TYI|TTD:D0B0SH|TTD:D0F8RA	Theophylline (DrugBank:DB00277)|Aminophylline (DrugBank:DB01223)|theophylline (IUPHAR:413)|Aminophylline (USP/INN) (KEGG:D00227)|Theophylline (JP17) (KEGG:D00371)|Theophylline sodium acetate (JAN) (KEGG:D01712)|Ambuphylline (USAN) (KEGG:D02884)|Guaithylline (USAN) (KEGG:D04374)|Aminophylline hydrate (JP17) (KEGG:D05429)|Theophylline (USP) (KEGG:D06103)|Theophylline sodium glycinate (USP) (KEGG:D0…	Approved (DrugBank:DB00277)|Approved (DrugBank:DB01223)|Approved (IUPHAR:413)	58-55-9 (DrugBank:DB00277)|317-34-0 (DrugBank:DB01223)|317-34-0 (KEGG:D00227)|58-55-9 (KEGG:D00371)|8002-89-9 (KEGG:D01712)|5634-34-4 (KEGG:D02884)|5634-38-8 (KEGG:D04374)|5967-84-0 (KEGG:D06103)|8000-10-0 (KEGG:D06104)	R03DA04; R03DA20; R03DA54; R03DA74; R03DB04 (DrugBank:DB00277)|R03DA05; R03DA20; R03DA55; R03DB05 (DrugBank:DB01223)|R03DA05 (KEGG:D00227)|R03DA04 (KEGG:D00371)|R03DA04 (KEGG:D01712)|R03DA10 (KEGG:D02884)|R03DA05 (KEGG:D05429)|R03DA04 (KEGG:D06103)|R03DA04 (KEGG:D06104)	For the treatment of the symptoms and reversible airflow obstruction associated with chronic asthma and other chronic lung diseases, such as emphysema and chronic bronchitis. (DrugBank:DB00277)|For the treatment of bronchospasm due to asthma, emphysema and chronic bronchitis. (DrugBank:DB01223)|Natural product (IUPHAR:413)|Bronchodilator, Cardiotonic, Phosphodiesterase inhibitor (KEGG:D00227)|Bro…
D-02230	CCCOC(=O)C1=CC=C(O)C=C1 (DrugBank:DB14177)|c1cc(ccc1C(=O)OCCC)O (KEGG:D01422)	CCCOC(=O)c1ccc(cc1)O	180.2	1.959	10	DrugBank:DB14177|KEGG:D01422	Propylparaben (DrugBank:DB14177)|Propyl parahydroxybenzoate (JP17) (KEGG:D01422)	Approved; Experimental (DrugBank:DB14177)	94-13-3 (DrugBank:DB14177)|94-13-3 (KEGG:D01422)		Propylparaben is used in allergenic testing. (DrugBank:DB14177)|Pharmaceutic aid (antifungal) (KEGG:D01422)
D-02236	O(c1nc(NC(=O)C)ccc1)CC (TTD:D0E8KF)	CCOc1cccc(n1)NC(=O)C	180.204	1.5117	9	TTD:D0E8KF
D-02238	n1cc(cnc1)C#Cc1ccccc1 (TTD:D08PDF)	c1ccc(cc1)C#Cc1cncnc1	180.205	1.8764	12	TTD:D08PDF
D-02240	C1=CC2=CC=C3C=CC=NC3=C2N=C1 (DrugBank:DB02365)	c1ccc2c(n1)c1ncccc1cc2	180.205	2.783	12	DrugBank:DB02365	1,10-Phenanthroline (DrugBank:DB02365)	Experimental (DrugBank:DB02365)	66-71-7 (DrugBank:DB02365)
D-02243	S(=O)(=O)(Nc1scnn1)N (TTD:D00BMI)	NS(=O)(=O)Nc1scnn1	180.209	1.0076	2	TTD:D00BMI
D-02244	S(=O)(=O)(N)c1sc(nn1)N (TTD:D0E7FI)	Nc1nnc(s1)S(=O)(=O)N	180.209	1.13	2	TTD:D0E7FI
D-02247	CS(=N)(=O)CC[C@H](N)C(O)=O (DrugBank:DB14103)	OC(=O)[C@H](CCS(=O)(=N)C)N	180.225	1.1307	5	DrugBank:DB14103	Methionine sulfoximine (DrugBank:DB14103)	Experimental (DrugBank:DB14103)	15985-39-4 (DrugBank:DB14103)
D-02248	C([3H])(C(c1c[nH]c2c1cc(O)cc2)[3H])N (IUPHAR:3248)|Oc1cc2c(C(C(N)[3H])[3H])c[nH]c2cc1 (TTD:D0N8BJ)	C([3H])(C(c1c[nH]c2c1cc(O)cc2)[3H])N	180.231	2.075	10	IUPHAR:3248|TTD:D0N8BJ	[<sup>3</sup>H]5-HT (IUPHAR:3248)|[3H]5-HT (TTD:D0N8BJ)	Labelled; Radioactive (IUPHAR:3248)			Metabolite (IUPHAR:3248)
D-02249	C1CC1C(NC1=NCCO1)C1CC1 (DrugBank:DB11738)|C1(CC1)C(NC1=NCCO1)C1CC1 (KEGG:D08482)	C1CN=C(O1)NC(C1CC1)C1CC1	180.247	0.9773	10	DrugBank:DB11738|KEGG:D08482	Rilmenidine (DrugBank:DB11738)|Rilmenidine (INN) (KEGG:D08482)	Approved; Investigational (DrugBank:DB11738)	54187-04-1 (DrugBank:DB11738)|54187-04-1 (KEGG:D08482)	C02AC06 (DrugBank:DB11738)|C02AC06 (KEGG:D08482)	Antihypertensive, alpha2-Adrenergic receptor agonist (KEGG:D08482)
D-02262	Oc1cc(ccc1O)/C=C/[N+](=O)[O-] (TTD:D0L3SN)	O=N(=O)/C=C/c1ccc(c(c1)O)O	181.145	1.8684	8	TTD:D0L3SN
D-02265	OC(=O)Cc1cccnc1C(=O)O (IUPHAR:4216)|OC(=O)Cc1c(nccc1)C(=O)O (TTD:D0B5ZA)	OC(=O)Cc1cccnc1C(=O)O	181.145	0.4069	8	IUPHAR:4216|TTD:D0B5ZA	homoquinolinic acid (IUPHAR:4216)|homoquinolinic acid (TTD:D0B5ZA)				Synthetic organic (IUPHAR:4216)
D-02269	P(=O)(O)(O)C(N)CCCCC (TTD:D03JAL)	CCCCCC(P(=O)(O)O)N	181.17	1.7295	6	TTD:D03JAL
D-02285	S(=O)(=O)(N)c1ccc(cc1)C#C (TTD:D0LJ5P)	C#Cc1ccc(cc1)S(=O)(=O)N	181.212	2.0964	8	TTD:D0LJ5P
D-02286	CN(C)C(=O)OC1=C[N+](C)=CC=C1 (DrugBank:DB00545)|C[n+]1cccc(c1)OC(=O)N(C)C (IUPHAR:8994)|c1(OC(=O)N(C)C)c[n+](ccc1)C.[Br-] (KEGG:D00487)|[Br-].O(c1c[n+](ccc1)C)C(=O)N(C)C (TTD:D09KKU)|O(c1c[n+](ccc1)C)C(=O)N(C)C (TTD:D0O2WB)	C[n+]1cccc(c1)OC(=O)N(C)C	181.212	0.5715	9	DrugBank:DB00545|IUPHAR:8994|KEGG:D00487|TTD:D09KKU|TTD:D0O2WB	Pyridostigmine (DrugBank:DB00545)|pyridostigmine (IUPHAR:8994)|Pyridostigmine bromide (JP17/USP/INN) (KEGG:D00487)|Pyridostigmine (TTD:D0O2WB)	Approved; Investigational (DrugBank:DB00545)|Approved (IUPHAR:8994)	155-97-5 (DrugBank:DB00545)|101-26-8 (KEGG:D00487)	N07AA02 (DrugBank:DB00545)|N07AA02 (KEGG:D00487)	For the treatment of myasthenia gravis. (DrugBank:DB00545)|Synthetic organic (IUPHAR:8994)|Acetylcholinesterase inhibitor (KEGG:D00487)|Myasthenia gravis (TTD:D0O2WB)
D-02289	CCNCC(O)C1=CC(O)=CC=C1 (DrugBank:DB08985)|c1(cccc(c1)C(CNCC)O)O.Cl (KEGG:D01573)|c1(cccc(c1)C(CNCC)O)O (KEGG:D07931)|c1(cc(O)ccc1)C(O)CNCC (TTD:D01MXV)	CCNCC(c1cccc(c1)O)O	181.232	1.426	10	DrugBank:DB08985|KEGG:D01573|KEGG:D07931|TTD:D01MXV	Etilefrine (DrugBank:DB08985)|Etilefrine hydrochloride (JP17) (KEGG:D01573)|Etilefrine (INN) (KEGG:D07931)	Withdrawn (DrugBank:DB08985)	709-55-7 (DrugBank:DB08985)|943-17-9 (KEGG:D01573)|709-55-7 (KEGG:D07931)	C01CA01; C01CA51 (DrugBank:DB08985)|C01CA01 (KEGG:D01573)|C01CA01 (KEGG:D07931)	Antihypotensive, Cardiotonic, Adrenergic receptor agonist (KEGG:D01573)|Antihypotensive, Cardiotonic, Adrenergic receptor agonist (KEGG:D07931)|Cardiovascular disorder (TTD:D01MXV)
D-02294	n1cc(/C=C\c2ccccc2)ccc1 (TTD:D02UZI)	c1ccc(cc1)/C=C\c1cccnc1	181.233	3.252	13	TTD:D02UZI
D-02299	CN(CCCCCc1[nH]cnc1)C (IUPHAR:1245)|N(CCCCCc1[nH]cnc1)(C)C (TTD:D0K8DZ)	CN(CCCCCc1[nH]cnc1)C	181.278	1.6841	10	IUPHAR:1245|TTD:D0K8DZ	VUF 5207 (IUPHAR:1245)|VUF 5207 (TTD:D0K8DZ)				Synthetic organic (IUPHAR:1245)
D-02300	S(c1ccc(CC(N)C)cc1)C (TTD:D08SCH)	CSc1ccc(cc1)CC(N)C	181.298	2.9985	10	TTD:D08SCH	2-Amino-1-(4-methylthiophenyl)propane (TTD:D08SCH)
D-02301	S(c1ccc(C[C@@H](N)C)cc1)C (TTD:D0Q2QA)	CSc1ccc(cc1)C[C@@H](N)C	181.298	2.9985	10	TTD:D0Q2QA
D-02304	Clc1cc2c(NC(=O)C2=O)cc1 (TTD:D03TPH)	Clc1ccc2c(c1)C(=O)C(=O)N2	181.576	1.6128	8	TTD:D03TPH
D-02305	Clc1c2c(NC(=O)C2=O)ccc1 (TTD:D04AXR)	O=C1Nc2c(C1=O)c(Cl)ccc2	181.576	1.6128	8	TTD:D04AXR
D-02306	Clc1c2NC(=O)C(=O)c2ccc1 (TTD:D0X0ER)	O=C1Nc2c(C1=O)cccc2Cl	181.576	1.6128	8	TTD:D0X0ER
D-02310	C[Se]C[C@H](N)C(O)=O (DrugBank:DB12697)	C[Se]C[C@@H](C(=O)O)N	182.08	0.2692	4	DrugBank:DB12697	Methylselenocysteine (DrugBank:DB12697)	Investigational (DrugBank:DB12697)	26046-90-2 (DrugBank:DB12697)
D-02319	NCCCC(N)(C(F)F)C(O)=O (DrugBank:DB06243)|NCCCC(C(=O)O)(C(F)F)N (IUPHAR:5176)|C(CCCN)(C(=O)O)(C(F)F)N.O.Cl (KEGG:D00829)|C(CCCN)(C(=O)O)(C(F)F)N (KEGG:D07883)|Cl.FC(F)C(N)(CCCN)C(=O)O.O (TTD:D05UOW)|FC(F)C(N)(CCCN)C(=O)O (TTD:D0X7JR)|FC(F)C(N)(CCCN)C(=O)O (TTD:D0Y4DA)	NCCCC(C(=O)O)(C(F)F)N	182.168	1.1731	6	DrugBank:DB06243|IUPHAR:5176|KEGG:D00829|KEGG:D07883|TTD:D05UOW|TTD:D0X7JR|TTD:D0Y4DA	Eflornithine (DrugBank:DB06243)|eflornithine (IUPHAR:5176)|Eflornithine hydrochloride (USAN) (KEGG:D00829)|Eflornithine (INN) (KEGG:D07883)|Eflornithine (TTD:D0X7JR)	Approved; Withdrawn (DrugBank:DB06243)|Approved (IUPHAR:5176)	70052-12-9 (DrugBank:DB06243)|96020-91-6 (KEGG:D00829)|67037-37-0 (KEGG:D07883)	D11AX16; P01CX03 (DrugBank:DB06243)|D11AX16; P01CX03 (KEGG:D00829)|D11AX16; P01CX03 (KEGG:D07883)	Eflornithine is indicated in the treatment of facial hirsutism (excessive hair growth). (DrugBank:DB06243)|Synthetic organic (IUPHAR:5176)|Antineoplastic, Antiprotozoal, Ornithine decarboxylase inhibitor (KEGG:D00829)|Antineoplastic, Antiprotozoal, Ornithine decarboxylase inhibitor (KEGG:D07883)|African trypanosomiasis (TTD:D0X7JR)
D-02328	O=C1c2c3c(C1=O)cccc3ccc2 (TTD:D06VGD)	O=C1C(=O)c2c3c1cccc3ccc2	182.175	2.2188	12	TTD:D06VGD
D-02331	CN(C)\N=N\C1=C(N=CN1)C(N)=O (DrugBank:DB00851)|c1(c(nc[nH]1)C(=O)N)/N=N/N(C)C (KEGG:D00288)|c1(c(nc[nH]1)C(=O)N)/N=N/N(C)C.C(CC(=O)O)(CC(=O)O)(C(=O)O)O (KEGG:D07772)	CN(/N=N/c1[nH]cnc1C(=O)N)C	182.183	0.7692	6	DrugBank:DB00851|KEGG:D00288|KEGG:D07772	Dacarbazine (DrugBank:DB00851)|Dacarbazine (JAN/USP/INN) (KEGG:D00288)|Dacarbazine citrate (KEGG:D07772)	Approved; Investigational (DrugBank:DB00851)	4342-03-4 (DrugBank:DB00851)|4342-03-4 (KEGG:D00288)|64038-56-8 (KEGG:D07772)	L01AX04 (DrugBank:DB00851)|L01AX04 (KEGG:D00288)|L01AX04 (KEGG:D07772)	For the treatment of metastatic malignant melanoma. In addition, dacarbazine is also indicated for Hodgkin's disease as a secondary-line therapy when used in combination with other antineoplastic agents. (DrugBank:DB00851)|Antineoplastic, Alkylating agent (KEGG:D00288)|Antineoplastic, Alkylating agent (KEGG:D07772)
D-02332	CN(N/N=C\1/N=CN=C1C(=O)N)C (IUPHAR:9075)|O=C(N)C1=NC=N/C/1=N/NN(C)C (TTD:D0Y7ZU)	CN(N/N=C\1/N=CN=C1C(=O)N)C	182.183	-1.7033	6	IUPHAR:9075|TTD:D0Y7ZU	dacarbazine (IUPHAR:9075)|Dacarbazine (TTD:D0Y7ZU)	Approved (IUPHAR:9075)			Synthetic organic (IUPHAR:9075)|Melanoma (TTD:D0Y7ZU)
D-02336	O=S1(=O)CCS(=O)(=O)C=C1 (IUPHAR:3486)|S1(=O)(=O)CCS(=O)(=O)C=C1 (TTD:D0XR0L)	O=S1(=O)CCS(=O)(=O)C=C1	182.218	1.4624	4	IUPHAR:3486|TTD:D0XR0L	2,3-dihydro-1,4-dithiin-1,1,4,4-tetroxide (IUPHAR:3486)				Synthetic organic (IUPHAR:3486)
D-02337	OC(=O)C(S)C(S)C(O)=O (DrugBank:DB14089)|OC(=O)C(C(C(=O)O)S)S.[99Tc] (KEGG:D02025)	SC(C(C(=O)O)S)C(=O)O	182.218	-0.2476	4	DrugBank:DB14089|KEGG:D02025	Dimercaptosuccinic acid (DrugBank:DB14089)|Technetium Tc 99m succimer (USP) (KEGG:D02025)	Approved; Experimental (DrugBank:DB14089)	2418-14-6 (DrugBank:DB14089)|65438-08-6 (KEGG:D02025)	V09CA02 (KEGG:D02025)	Diagnostic aid, Radioactive agent (KEGG:D02025)
D-02342	FCCCCc1nc(N)cc(c1)C (TTD:D00GYE)	FCCCCc1cc(C)cc(n1)N	182.238	2.8456	10	TTD:D00GYE
D-02343	[H][C@]1(C)CN=C(N)C2=C(O1)C=CS2 (DrugBank:DB07003)	C[C@H]1CN=C(c2c(O1)ccs2)N	182.243	1.3702	8	DrugBank:DB07003	(2S)-2-methyl-2,3-dihydrothieno[2,3-f][1,4]oxazepin-5-amine (DrugBank:DB07003)	Experimental (DrugBank:DB07003)
D-02344	CC1=NC2=C(CSCC2)C(=O)N1 (DrugBank:DB07677)	Cc1nc2CCSCc2c(=O)[nH]1	182.243	0.8676	8	DrugBank:DB07677	2-methyl-3,5,7,8-tetrahydro-4H-thiopyrano[4,3-d]pyrimidin-4-one (DrugBank:DB07677)	Experimental (DrugBank:DB07677)
D-02348	s1nccc1CCN1CCCC1 (TTD:D02HNE)	C1CCN(C1)CCc1ccns1	182.286	1.7193	9	TTD:D02HNE
D-02350	P(=O)(O)(O)CCC(N)C(=O)O (TTD:D00IGI)	OC(=O)C(CCP(=O)(O)O)N	183.1	-0.3336	4	TTD:D00IGI
D-02352	OC(=O)[C@H](CCP(=O)(O)O)N (IUPHAR:1410)|OC(=O)[C@H](CCP(=O)(O)O)N (IUPHAR:1412)|P(=O)(O)(O)CC[C@H](N)C(=O)O (TTD:D08PBE)|P(=O)(O)(O)CC[C@H](N)C(=O)O (TTD:D0H7UP)|P(=O)(O)(O)CC[C@H](N)C(=O)O (TTD:D0PN6Z)	OC(=O)[C@H](CCP(=O)(O)O)N	183.1	-0.3336	4	IUPHAR:1410|IUPHAR:1412|TTD:D08PBE|TTD:D0H7UP|TTD:D0PN6Z	L-AP4 (IUPHAR:1410)|[<sup>3</sup>H]AP4 (IUPHAR:1412)|L-AP4 (TTD:D0PN6Z)	Labelled; Radioactive (IUPHAR:1412)			Synthetic organic (IUPHAR:1410)|Synthetic organic (IUPHAR:1412)
D-02354	N[C@H](C(O)=O)C1=CC(O)=CC(O)=C1 (DrugBank:DB04228)	OC(=O)[C@H](c1cc(O)cc(c1)O)N	183.161	0.8825	8	DrugBank:DB04228	(2r)-Amino(3,5-Dihydroxyphenyl)Acetic Acid (DrugBank:DB04228)	Experimental (DrugBank:DB04228)
D-02359	O=C1NS(=O)(=O)C2=C1C=CC=C2 (DrugBank:DB12418)|O=C1NS(=O)(=O)c2c1cccc2 (IUPHAR:5432)|c12c(S(=O)(=O)NC1=O)cccc2 (KEGG:D01085)|S1(=O)(=O)NC(=O)c2c1cccc2 (TTD:D0A0YX)	O=C1NS(=O)(=O)c2c1cccc2	183.185	1.5283	7	DrugBank:DB12418|IUPHAR:5432|KEGG:D01085|TTD:D0A0YX	Saccharin (DrugBank:DB12418)|saccharin (IUPHAR:5432)|Saccharin (JP17/NF) (KEGG:D01085)	Investigational (DrugBank:DB12418)	81-07-2 (DrugBank:DB12418)|81-07-2 (KEGG:D01085)		Synthetic organic (IUPHAR:5432)|Pharmaceutic aid (sweetener) (KEGG:D01085)
D-02362	OC(C(N)C)c1cc(O)c(O)cc1 (TTD:D06SYS)	CC(C(c1ccc(c(c1)O)O)O)N	183.204	1.1787	9	TTD:D06SYS
D-02363	CNCC(c1ccc(c(c1)O)O)O (IUPHAR:509)|c1(c(ccc(c1)C(CNC)O)O)O (KEGG:D05688)|c1(c(ccc(c1)C(CNC)O)O)O.Cl (KEGG:D05689)|OC(c1cc(O)c(O)cc1)CNC (TTD:D04PHC)	CNCC(c1ccc(c(c1)O)O)O	183.204	0.7415	9	IUPHAR:509|KEGG:D05688|KEGG:D05689|TTD:D04PHC	(&plusmn;)-adrenaline (IUPHAR:509)|Racepinephrine (USP/INN) (KEGG:D05688)|Racepinephrine hydrochloride (USP) (KEGG:D05689)|Epinephrine (TTD:D04PHC)		329-65-7 (KEGG:D05688)		Metabolite (IUPHAR:509)|Bronchodilator (KEGG:D05688)|Bronchodilator (KEGG:D05689)|Allergy; Sepsis (TTD:D04PHC)
D-02364	CNC[C@H](O)C1=CC(O)=C(O)C=C1 (DrugBank:DB00668)|CNC[C@@H](c1ccc(c(c1)O)O)O (IUPHAR:479)|c1(ccc(c(c1)O)O)[C@H](CNC)O (KEGG:D00095)|Cl.c1(ccc(c(c1)O)O)[C@H](CNC)O (KEGG:D00996)|c1(ccc(c(c1)O)O)[C@H](CNC)O.OC(=O)[C@@H]([C@H](C(=O)O)O)O (KEGG:D02149)	CNC[C@@H](c1ccc(c(c1)O)O)O	183.204	0.7415	9	DrugBank:DB00668|IUPHAR:479|KEGG:D00095|KEGG:D00996|KEGG:D02149	Epinephrine (DrugBank:DB00668)|(-)-adrenaline (IUPHAR:479)|Epinephrine (USP/INN) (KEGG:D00095)|Epinephrine hydrochloride (JAN) (KEGG:D00996)|Epinephrine bitartrate (JAN/USP) (KEGG:D02149)	Approved; Vet_approved (DrugBank:DB00668)|Approved (IUPHAR:479)	51-43-4 (DrugBank:DB00668)|51-43-4 (KEGG:D00095)|55-31-2 (KEGG:D00996)|51-42-3 (KEGG:D02149)	A01AD01; B02BC09; C01CA24; R01AA14; R03AA01; R03AK01; S01EA01; S01EA51 (DrugBank:DB00668)|A01AD01; B02BC09; C01CA24; R01AA14; R03AA01; S01EA01 (KEGG:D00095)|A01AD01; B02BC09; C01CA24; R01AA14; R03AA01; S01EA01 (KEGG:D00996)|A01AD01; B02BC09; C01CA24; R01AA14; R03AA01; S01EA01 (KEGG:D02149)	Epinephrine injection is indicated in the emergency treatment of allergic reactions (Type I) including anaphylaxis to stinging insects (e.g., order Hymenoptera, which include bees, wasps, hornets, yellow jackets and fire ants) and biting insects (e.g., triatoma, mosquitos), allergen immunotherapy, foods, drugs, diagnostic testing substances (e.g., radiocontrast media) and other allergens, as well…
D-02366	C[C@H](N)[C@H](O)C1=CC(O)=C(O)C=C1 (DrugBank:DB06707)|C[C@@H]([C@@H](c1ccc(c(c1)O)O)O)N (IUPHAR:508)|c1(ccc(c(c1)O)O)[C@H]([C@H](C)N)O (KEGG:D02388)|O[C@@H]([C@@H](N)C)c1cc(O)c(O)cc1 (TTD:D0E9VU)	C[C@@H]([C@@H](c1ccc(c(c1)O)O)O)N	183.204	1.1787	9	DrugBank:DB06707|IUPHAR:508|KEGG:D02388|TTD:D0E9VU	Levonordefrin (DrugBank:DB06707)|corbadrine (IUPHAR:508)|Levonordefrin (USP) (KEGG:D02388)	Approved (DrugBank:DB06707)|Approved (IUPHAR:508)	829-74-3 (DrugBank:DB06707)|829-74-3 (KEGG:D02388)		Used as a topical nasal decongestant and vasoconstrictor in dentistry. (DrugBank:DB06707)|Synthetic organic (IUPHAR:508)|Antihypertensive, Vasoconstrictor, alpha2-Adrenergic receptor agonist (KEGG:D02388)
D-02372	O=C1NCc2c3c1cccc3ccc2 (TTD:D05HJG)	O=C1NCc2c3c1cccc3ccc2	183.206	2.412	12	TTD:D05HJG
D-02373	o1cc(c2c3c([nH]c2)cccc3)cc1 (TTD:D08OSM)	c1occ(c1)c1c[nH]c2c1cccc2	183.206	3.4279	12	TTD:D08OSM
D-02379	O(C1C2NC(C1)CCC2)C(=O)CC (TTD:D04XNH)	CCC(=O)OC1CC2NC1CCC2	183.247	1.5514	10	TTD:D04XNH
D-02383	n1c(C#CC2=CCCCC2)cccc1 (TTD:D0C0FH)	C1CCC(=CC1)C#Cc1ccccn1	183.249	2.9335	13	TTD:D0C0FH
D-02392	OC1=CC=C(C=C1[N+]([O-])=O)[N+]([O-])=O (DrugBank:DB04528)	O=N(=O)c1ccc(c(c1)N(=O)=O)O	184.106	2.255	6	DrugBank:DB04528	2,4-Dinitrophenol (DrugBank:DB04528)	Experimental (DrugBank:DB04528)	51-28-5 (DrugBank:DB04528)
D-02394	CC(C)OP(F)(=O)OC(C)C (DrugBank:DB00677)|P(=O)(OC(C)C)(OC(C)C)F (KEGG:D00043)|P(=O)(F)(OC(C)C)OC(C)C (TTD:D0B2OT)	CC(OP(=O)(OC(C)C)F)C	184.146	2.914	6	DrugBank:DB00677|KEGG:D00043|TTD:D0B2OT	Isoflurophate (DrugBank:DB00677)|Isoflurophate (KEGG:D00043)|Isoflurophate (TTD:D0B2OT)	Approved; Investigational; Withdrawn (DrugBank:DB00677)	55-91-4 (DrugBank:DB00677)|55-91-4 (KEGG:D00043)	S01EB07 (KEGG:D00043)	For use in the eye to treat certain types of glaucoma and other eye conditions, such as accommodative esotropia. (DrugBank:DB00677)|Acetylcholinesterase inhibitor, Butyrylcholinesterase inhibitor (ophthalmic) (KEGG:D00043)|Glaucoma (TTD:D0B2OT)
D-02402	COc1ccc(cc1)C=C(C#N)C#N (IUPHAR:5917)|O(c1ccc(cc1)C=C(C#N)C#N)C (TTD:D0H3UI)	COc1ccc(cc1)C=C(C#N)C#N	184.194	2.12576	11	IUPHAR:5917|TTD:D0H3UI	AG 9 (IUPHAR:5917)|AG 9 (TTD:D0H3UI)				Synthetic organic (IUPHAR:5917)
D-02406	N1C=CC(=N1)C1=NC2=CC=CC=C2N1 (DrugBank:DB08065)	c1[nH]nc(c1)c1nc2c([nH]1)cccc2	184.197	1.953	10	DrugBank:DB08065	2-(1H-pyrazol-3-yl)-1H-benzimidazole (DrugBank:DB08065)	Experimental (DrugBank:DB08065)
D-02416	Cl.S(Cc1ccc(F)cc1)C(=N)N (TTD:D02IVJ)	NC(=N)SCc1ccc(cc1)F	184.234	2.7524	8	TTD:D02IVJ
D-02418	CC1=CC=C(N=C1)C1=CC=C(C)C=N1 (DrugBank:DB11932)|c1cc(cnc1c1ncc(cc1)C)C (KEGG:D10687)	Cc1ccc(nc1)c1ccc(cn1)C	184.237	2.7604	12	DrugBank:DB11932|KEGG:D10687	Abametapir (DrugBank:DB11932)|Abametapir (USAN/INN) (KEGG:D10687)	Investigational (DrugBank:DB11932)	1762-34-1 (DrugBank:DB11932)|1762-34-1 (KEGG:D10687)		Pediculicide (KEGG:D10687)
D-02421	s1[nH]c(=O)cc1C1CCNCC1 (TTD:D0P3FZ)	O=c1[nH]sc(c1)C1CCNCC1	184.259	1.2322	8	TTD:D0P3FZ
D-02423	NC(=N)SCCCc1cnc[nH]1 (IUPHAR:1246)|S(CCCc1[nH]cnc1)C(=N)N (TTD:D0Q8NO)	NC(=N)SCCCc1cnc[nH]1	184.262	1.769	7	IUPHAR:1246|TTD:D0Q8NO	VUF 8328 (IUPHAR:1246)				Synthetic organic (IUPHAR:1246)
D-02432	NC(=O)CI (IUPHAR:6271)|ICC(=O)N (TTD:D03GXQ)	NC(=O)CI	184.964	0.607	2	IUPHAR:6271|TTD:D03GXQ	2-iodoacetamide (IUPHAR:6271)				Synthetic organic (IUPHAR:6271)
D-02433	N[C@@H](COP(O)(O)=O)C(O)=O (DrugBank:DB04522)|OC(=O)[C@H](COP(=O)(O)O)N (IUPHAR:1411)|P(=O)(OC[C@H](N)C(=O)O)(O)O (TTD:D06PRT)|P(=O)(OC[C@H](N)C(=O)O)(O)O (TTD:D07PZQ)	OC(=O)[C@H](COP(=O)(O)O)N	185.072	-0.7921	3	DrugBank:DB04522|IUPHAR:1411|TTD:D06PRT|TTD:D07PZQ	Dexfosfoserine (DrugBank:DB04522)|L-serine-O-phosphate (IUPHAR:1411)|L-serine-O-phosphate (TTD:D07PZQ)	Experimental (DrugBank:DB04522)	407-41-0 (DrugBank:DB04522)		Metabolite (IUPHAR:1411)
D-02438	OC(=O)[C@H]1[C@H]2[C@@H]1[C@](CC2)(N)C(=O)O (IUPHAR:1393)|OC(=O)[C@H]1[C@H]2[C@@H]1[C@](CC2)(N)C(=O)O (IUPHAR:1396)|O.[C@H]1([C@@H]2[C@H]1CC[C@@]2(N)C(=O)O)C(=O)O (KEGG:D03966)|[C@H]12[C@H]([C@@](CC1)(C(=O)O)N)[C@H]2C(=O)O (KEGG:D08908)|OC(=O)[C@@H]1[C@@H]2[C@H]1CC[C@@]2(N)C(=O)O (TTD:D09PRG)|OC(=O)[C@@H]1[C@@H]2[C@H]1CC[C@@]2(N)C(=O)O (TTD:D0U5CS)	OC(=O)[C@H]1[C@H]2[C@@H]1[C@](CC2)(N)C(=O)O	185.177	0.2094	8	IUPHAR:1393|IUPHAR:1396|KEGG:D03966|KEGG:D08908|TTD:D09PRG|TTD:D0U5CS	eglumegad (IUPHAR:1393)|[<sup>3</sup>H]eglumegad (IUPHAR:1396)|Eglumetad (USAN) (KEGG:D03966)|Eglumegad (INN) (KEGG:D08908)|[3H]eglumegad (TTD:D09PRG)|LY354740 (TTD:D0U5CS)	Labelled; Radioactive (IUPHAR:1396)	209216-09-1 (KEGG:D03966)|176199-48-7 (KEGG:D08908)		Synthetic organic (IUPHAR:1393)|Synthetic organic (IUPHAR:1396)|Antianxiety, Smoking cessation adjunct, Metabotropic glutamate receptor agonist (KEGG:D03966)|Antianxiety, Smoking cessation adjunct, Metabotropic glutamate receptor agonist (KEGG:D08908)|Anxiety disorder (TTD:D0U5CS)
D-02442	Nc1[nH]nc2c1nc1ccccc1n2 (IUPHAR:5947)|n1c2c(nc3c1cccc3)n[nH]c2N (TTD:D0R5FH)	Nc1[nH]nc2c1nc1ccccc1n2	185.185	1.6695	9	IUPHAR:5947|TTD:D0R5FH	Cdk1/5 inhibitor (IUPHAR:5947)|Quinoxaline1 (TTD:D0R5FH)				Synthetic organic (IUPHAR:5947)
D-02447	[O-][N+](=O)CCC1N=C(N)CCCC1 (TTD:D03CAJ)	O=N(=O)CCC1CCCCC(=N1)N	185.224	1.6121	8	TTD:D03CAJ
D-02453	[H][C@]1(CCC2=C1C=CC=C2)N(C)CC#C (DrugBank:DB02211)|N([C@@H]1CCc2c1cccc2)(CC#C)C (TTD:D0A2AF)	C#CCN([C@@H]1CCc2c1cccc2)C	185.265	2.2389	13	DrugBank:DB02211|TTD:D0A2AF	N-Methyl-N-Propargyl-1(R)-Aminoindan (DrugBank:DB02211)	Experimental (DrugBank:DB02211)
D-02454	n1c(C#CC2CCCCC2)cccc1 (TTD:D02KHF)	C1CCC(CC1)C#Cc1ccccn1	185.265	3.0134	13	TTD:D02KHF
D-02455	NC(Cc1cc2c(cc1)cccc2)C (TTD:D00YVE)	CC(Cc1ccc2c(c1)cccc2)N	185.265	3.4298	13	TTD:D00YVE
D-02464	Clc1ccc([C@]2(F)[C@H](N)C2)cc1 (TTD:D06AAA)	N[C@@H]1C[C@]1(F)c1ccc(cc1)Cl	185.626	2.9361	9	TTD:D06AAA
D-02465	Clc1ccc([C@]2(F)[C@@H](N)C2)cc1 (TTD:D03LGV)	N[C@H]1C[C@]1(F)c1ccc(cc1)Cl	185.626	2.9361	9	TTD:D03LGV
D-02470	o1c2c(c3oc(=O)ccc3cc2)cc1 (TTD:D01OLO)|o1c2c(c3oc(=O)ccc3cc2)cc1 (TTD:D0S5KN)	O=c1ccc2c(o1)c1ccoc1cc2	186.164	2.5392	11	TTD:D01OLO|TTD:D0S5KN					Multiple myeloma (TTD:D01OLO)
D-02471	c1(=O)ccc2c(o1)cc1c(c2)cco1 (KEGG:D08450)|o1c2c(cc3c(oc(=O)cc3)c2)cc1 (TTD:D00VUI)	O=c1ccc2c(o1)cc1c(c2)cco1	186.164	2.5392	11	KEGG:D08450|TTD:D00VUI	Psoralene (DCF) (KEGG:D08450)		66-97-7 (KEGG:D08450)		Pigmentation agent (KEGG:D08450)
D-02472	OC(=O)C(Cc1c(C)o[nH]c1=O)N (IUPHAR:4077)|OC(=O)C(Cc1c(C)o[nH]c1=O)N (IUPHAR:4131)|o1[nH]c(=O)c(CC(N)C(=O)O)c1C (TTD:D03RGP)|o1[nH]c(=O)c(CC(N)C(=O)O)c1C (TTD:D0O7KO)	OC(=O)C(Cc1c(C)o[nH]c1=O)N	186.165	-0.069	7	IUPHAR:4077|IUPHAR:4131|TTD:D03RGP|TTD:D0O7KO	[<sup>3</sup>H]AMPA (IUPHAR:4077)|AMPA (IUPHAR:4131)	Labelled; Radioactive (IUPHAR:4077)			Synthetic organic (IUPHAR:4077)|Synthetic organic (IUPHAR:4131)
D-02474	o1[nH]c(=O)c(C[C@H](N)C(=O)O)c1C (TTD:D0T5SU)	OC(=O)[C@H](Cc1c(C)o[nH]c1=O)N	186.165	-0.069	7	TTD:D0T5SU
D-02475	CC1=C(C[C@H](N)C(O)=O)C(O)=NO1 (DrugBank:DB02057)	OC(=O)[C@H](Cc1c(C)onc1O)N	186.165	0.3433	7	DrugBank:DB02057	(S)-AMPA (DrugBank:DB02057)	Experimental (DrugBank:DB02057)	83643-88-3 (DrugBank:DB02057)
D-02477	Oc1cc(ccc1O)C=C(C#N)C#N (TTD:D0A0JL)	N#CC(=Cc1ccc(c(c1)O)O)C#N	186.167	1.52836	10	TTD:D0A0JL
D-02478	O=c1[nH]c(=O)c2c1c1c([nH]cc1)cc2 (TTD:D03VNZ)	O=c1[nH]c(=O)c2c1c1cc[nH]c1cc2	186.167	0.8074	10	TTD:D03VNZ
D-02484	S(=O)(=O)([O-])CNc1ccccc1.[Na+] (TTD:D07UCQ)	[O-]S(=O)(=O)CNc1ccccc1	186.208	1.755	7	TTD:D07UCQ
D-02485	C1(=NCCN1)c1cc2c(o1)cccc2 (TTD:D0LI3J)	C1CN=C(N1)c1cc2c(o1)cccc2	186.21	1.547	11	TTD:D0LI3J	2-BFi (TTD:D0LI3J)
D-02486	O=C(N)c1c2nc(ccc2ccc1)C (TTD:D0S8HZ)	Cc1ccc2c(n1)c(ccc2)C(=O)N	186.21	2.3424	11	TTD:D0S8HZ
D-02487	O=C(n1nccc1)c1c(cccc1)C (TTD:D07DOW)	Cc1ccccc1C(=O)n1cccn1	186.21	1.88	11	TTD:D07DOW
D-02488	O=C(N)c1c2ncc(cc2ccc1)C (TTD:D08XPZ)	Cc1cnc2c(c1)cccc2C(=O)N	186.21	2.3424	11	TTD:D08XPZ
D-02495	S(=O)(=O)(N)c1ccc(NC)cc1 (TTD:D07AGM)	CNc1ccc(cc1)S(=O)(=O)N	186.232	2.2298	7	TTD:D07AGM
D-02496	NCC1=CC=C(C=C1)S(N)(=O)=O (DrugBank:DB06795)|c1(ccc(cc1)CN)S(=O)(=O)N.C(=O)(C)O (KEGG:D01166)|c1(ccc(cc1)CN)S(=O)(=O)N (KEGG:D02351)|c1(ccc(cc1)CN)S(=O)(=O)N.Cl.O.c1(ccc(CN)cc1)S(=O)(=O)N.c1(ccc(CN)cc1)S(=O)(=O)N.Cl.Cl.O (KEGG:D04815)|S(=O)(=O)(c1ccc(cc1)CN)N (TTD:D0K1QD)|S(=O)(=O)(N)c1ccc(cc1)CN (TTD:D0VD0C)	NCc1ccc(cc1)S(=O)(=O)N	186.232	2.2741	7	DrugBank:DB06795|KEGG:D01166|KEGG:D02351|KEGG:D04815|TTD:D0K1QD|TTD:D0VD0C	Mafenide (DrugBank:DB06795)|Mafenide acetate (JAN/USP) (KEGG:D01166)|Mafenide (USAN/INN) (KEGG:D02351)|Homosulfamine (KEGG:D04815)|Sulfamylon (TTD:D0K1QD)	Approved; Vet_approved (DrugBank:DB06795)	138-39-6 (DrugBank:DB06795)|13009-99-9 (KEGG:D01166)|138-39-6 (KEGG:D02351)	D06BA03; G01AE10 (DrugBank:DB06795)|D06BA03 (KEGG:D01166)|D06BA03 (KEGG:D02351)|D06BA03 (KEGG:D04815)	Mafenide is indicated in the treatment of severe burns. (DrugBank:DB06795)|Antibacterial (topical) (KEGG:D01166)|Antibacterial (KEGG:D02351)|Antibacterial (KEGG:D04815)|Bacterial infections (TTD:D0K1QD)
D-02507	N(c1c2c(ccc1)cccc2)CCN (TTD:D0X5HL)	NCCNc1cccc2c1cccc2	186.253	2.9837	12	TTD:D0X5HL
D-02510	S1CN(C(=O)[C@H]2NCCC2)CC1 (TTD:D0R5OE)	O=C(N1CSCC1)[C@@H]1CCCN1	186.275	0.538	8	TTD:D0R5OE
D-02511	CCCCCCCCCCC(=O)O (IUPHAR:5533)|OC(=O)CCCCCCCCCC (TTD:D0X0PF)	CCCCCCCCCCC(=O)O	186.291	3.6018	11	IUPHAR:5533|TTD:D0X0PF	undecanoic acid (IUPHAR:5533)|undecanoic acid (TTD:D0X0PF)				Metabolite (IUPHAR:5533)
D-02514	S1CC(N=C(N)CC1)CC(C)C (TTD:D08CMQ)	CC(CC1CSCCC(=N1)N)C	186.318	2.0311	9	TTD:D08CMQ
D-02515	S1CC(N=C(N)CC1)CCCC (TTD:D01MEA)	CCCCC1CSCCC(=N1)N	186.318	2.1752	9	TTD:D01MEA
D-02522	OC(=O)[C@H]1[C@H]2[C@@H]1[C@](CO2)(N)C(=O)O (IUPHAR:1394)|O1[C@@H]2[C@@H]([C@H]2C(=O)O)[C@@](N)(C1)C(=O)O (TTD:D07GRG)	OC(=O)[C@H]1[C@H]2[C@@H]1[C@](CO2)(N)C(=O)O	187.15	-0.8018	7	IUPHAR:1394|TTD:D07GRG	LY379268 (IUPHAR:1394)				Synthetic organic (IUPHAR:1394)
D-02523	O=c1onc2n1c1ccccc1nc2 (IUPHAR:5234)|o1nc2n(c3c(nc2)cccc3)c1=O (TTD:D0R3FS)	O=c1onc2n1c1ccccc1nc2	187.155	0.8357	9	IUPHAR:5234|TTD:D0R3FS	ODQ (IUPHAR:5234)				Synthetic organic (IUPHAR:5234)
D-02524	NCC(c1cc(O)c(cc1F)O)O (IUPHAR:510)|Fc1c(C(O)CN)cc(O)c(O)c1 (TTD:D09CUJ)	NCC(c1cc(O)c(cc1F)O)O	187.168	0.9293	8	IUPHAR:510|TTD:D09CUJ	6-fluoro-noradrenaline (IUPHAR:510)|6-fluoro-noradrenaline (TTD:D09CUJ)				Synthetic organic (IUPHAR:510)
D-02526	Fc1c([C@@H](O)CN)ccc(O)c1O (TTD:D04BYL)	NC[C@@H](c1ccc(c(c1F)O)O)O	187.168	0.9293	8	TTD:D04BYL
D-02534	O1CC(N=C(N)CC1)CC[N+](=O)[O-] (TTD:D0LB9U)	O=N(=O)CCC1COCCC(=N1)N	187.196	0.4584	7	TTD:D0LB9U
D-02535	O=C(N)c1cc2c(nc1N)cccc2 (TTD:D0N1UB)	NC(=O)c1cc2ccccc2nc1N	187.198	2.1974	10	TTD:D0N1UB
D-02537	O=C(NC1=CC=CC=C1)C1=NNC=C1 (DrugBank:DB08135)	O=C(c1n[nH]cc1)Nc1ccccc1	187.198	1.735	10	DrugBank:DB08135	N-phenyl-1H-pyrazole-3-carboxamide (DrugBank:DB08135)	Experimental (DrugBank:DB08135)
D-02540	NC1=CC(=CNC1=O)C1=CC=NC=C1 (DrugBank:DB01427)|c1(c2ccncc2)cc(c(=O)[nH]c1)N (KEGG:D00231)|c1(c2ccncc2)cc(c(=O)[nH]c1)N.C(C(=O)O)CO (KEGG:D02084)|O=c1[nH]cc(c2ccncc2)cc1N (TTD:D0GB0P)|O=c1[nH]cc(c2ccncc2)cc1N (TTD:D0R6TI)	O=c1[nH]cc(cc1N)c1ccncc1	187.198	1.6003	10	DrugBank:DB01427|KEGG:D00231|KEGG:D02084|TTD:D0GB0P|TTD:D0R6TI	Amrinone (DrugBank:DB01427)|Inamrinone (USP) (KEGG:D00231)|Inamrinone ethylenelactate (KEGG:D02084)|Amrinone (TTD:D0GB0P)|Inamrinone Lactate (TTD:D0R6TI)	Approved (DrugBank:DB01427)	60719-84-8 (DrugBank:DB01427)|60719-84-8 (KEGG:D00231)|75898-90-7 (KEGG:D02084)	C01CE01 (DrugBank:DB01427)|C01CE01 (KEGG:D00231)|C01CE01 (KEGG:D02084)	Used in the treatment of congestive heart failure. (DrugBank:DB01427)|Cardiotonic, Phosphodiesterase 3 inhibitor (KEGG:D00231)|Cardiotonic, Phosphodiesterase 3 inhibitor (KEGG:D02084)|Congestive heart failure (TTD:D0GB0P)|Cardiotonic (TTD:D0R6TI)
D-02542	S(=O)(=O)(N)c1ccc(cc1)CO (TTD:D05XZM)	OCc1ccc(cc1)S(=O)(=O)N	187.216	1.6074	7	TTD:D05XZM	4-(hydroxymethyl)benzenesulfonamide (TTD:D05XZM)
D-02543	S(=O)(=O)(N)c1ccc(NN)cc1 (TTD:D0NN3Q)	NNc1ccc(cc1)S(=O)(=O)N	187.22	2.174	6	TTD:D0NN3Q	4-Hydrazino-benzenesulfonamide (TTD:D0NN3Q)
D-02544	S(=O)(=O)(N)c1c(NN)cccc1 (TTD:D0G0FJ)	NNc1ccccc1S(=O)(=O)N	187.22	2.174	6	TTD:D0G0FJ	2-hydrazinylbenzenesulfonamide (TTD:D0G0FJ)
D-02550	o1c2c(c3CCNCCc3cc2)cc1 (TTD:D0XX7J)	N1CCc2c(CC1)ccc1c2cco1	187.238	2.4498	12	TTD:D0XX7J
D-02551	o1c2c3c(CCNCC3)ccc2cc1 (TTD:D0O5KK)	N1CCc2c(CC1)ccc1c2occ1	187.238	2.4498	12	TTD:D0O5KK
D-02553	[H][C@]1(CCC2=CC=C(O)C=C12)NCC#C (DrugBank:DB04307)|Oc1cc2[C@H](NCC#C)CCc2cc1 (TTD:D01NIZ)|Oc1cc2[C@H](NCC#C)CCc2cc1 (TTD:D07BAO)	Oc1cc2[C@@H](CCc2cc1)NCC#C	187.238	1.9932	12	DrugBank:DB04307|TTD:D01NIZ|TTD:D07BAO	5-Hydroxy-N-Propargyl-1(R)-Aminoindan (DrugBank:DB04307)	Experimental (DrugBank:DB04307)
D-02556	CC(=N)NCCCC[C@H](C(=O)O)N (IUPHAR:5231)	CC(=N)NCCCC[C@H](C(=O)O)N	187.239	1.3463	8	IUPHAR:5231	NIL (IUPHAR:5231)				Synthetic organic (IUPHAR:5231)
D-02561	N(CCc1[nH]cnc1)c1ccccc1 (TTD:D02INJ)	c1ccc(cc1)NCCc1cnc[nH]1	187.241	2.1373	11	TTD:D02INJ
D-02566	C[C@H](CC1=CC=CC=C1)N(C)CC#C (DrugBank:DB01037)|C[C@@H](N(CC#C)C)Cc1ccccc1 (IUPHAR:6639)|c1(C[C@H](N(CC#C)C)C)ccccc1.Cl (KEGG:D00785)|c1(C[C@H](N(CC#C)C)C)ccccc1 (KEGG:D03731)|Cl.N([C@@H](Cc1ccccc1)C)(CC#C)C (TTD:D0J2MJ)|Cl.N([C@@H](Cc1ccccc1)C)(CC#C)C (TTD:D0OH5I)|N([C@@H](Cc1ccccc1)C)(CC#C)C (TTD:D0S2UG)|N([C@@H](Cc1ccccc1)C)(CC#C)C (TTD:D0VC5L)|Cl.N([C@@H](Cc1ccccc1)C)(CC#C)C (TTD:D0Y8AN)	C[C@@H](N(CC#C)C)Cc1ccccc1	187.281	2.1826	13	DrugBank:DB01037|IUPHAR:6639|KEGG:D00785|KEGG:D03731|TTD:D0J2MJ|TTD:D0OH5I|TTD:D0S2UG|TTD:D0VC5L|TTD:D0Y8AN	Selegiline (DrugBank:DB01037)|selegiline (IUPHAR:6639)|Selegiline hydrochloride (JAN/USP) (KEGG:D00785)|Selegiline (USAN/INN) (KEGG:D03731)|Selegiline Hydrochloride (TTD:D0J2MJ)|Selegiline (TTD:D0S2UG)	Approved; Investigational; Vet_approved (DrugBank:DB01037)|Approved (IUPHAR:6639)	14611-51-9 (DrugBank:DB01037)|14611-52-0 (KEGG:D00785)|14611-51-9 (KEGG:D03731)	N04BD01 (DrugBank:DB01037)|N04BD01 (KEGG:D00785)|N04BD01 (KEGG:D03731)	Monotherapy for initial treatment of Parkinson's disease, as well as an adjunct therapy in patients with a decreased response to levodopa/carbadopa. Also used for the palliative treatment of mild to moderate Alzheimer's disease and at higher doses, for the treatment of depression. (DrugBank:DB01037)|Synthetic organic (IUPHAR:6639)|Antiparkinsonian, Antidyskinetic, Monoamine oxidase B (MAO-B) inhi…
D-02574	CC1=CC(=O)c2c(C1=O)cccc2O (IUPHAR:7003)|Oc1c2c(C(=O)C(=CC2=O)C)ccc1 (TTD:D0P0IE)	CC1=CC(=O)c2c(C1=O)cccc2O	188.179	1.7175	11	IUPHAR:7003|TTD:D0P0IE	plumbagin (IUPHAR:7003)				Natural product (IUPHAR:7003)
D-02575	O(C1=CC(=O)c2c(C1=O)cccc2)C (TTD:D04OXY)	COC1=CC(=O)c2c(C1=O)cccc2	188.179	1.5959	11	TTD:D04OXY
D-02582	n1nnc([nH]1)c1n[nH]c2c1CC1C2C1 (IUPHAR:5790)	n1nnc([nH]1)c1n[nH]c2c1CC1C2C1	188.189	0.2494	8	IUPHAR:5790	compound (+)17a [PMID: 20363624] (IUPHAR:5790)				Synthetic organic (IUPHAR:5790)
D-02583	S(=O)(=O)(N)c1c(OC)ccnc1 (TTD:D00IKQ)	COc1ccncc1S(=O)(=O)N	188.204	1.5187	6	TTD:D00IKQ
D-02584	S(=O)(=O)(N)c1cn(ccc1=O)C (TTD:D05RAB)	Cn1ccc(=O)c(c1)S(=O)(=O)N	188.204	0.8138	6	TTD:D05RAB
D-02585	S(=O)(=O)(N)c1c(NN)ccnc1 (TTD:D0UM1I)	NNc1ccncc1S(=O)(=O)N	188.208	1.569	5	TTD:D0UM1I
D-02587	CNCC1=CC=C(O1)C1=CC=CN=C1 (DrugBank:DB07617)	CNCc1ccc(o1)c1cccnc1	188.226	2.4519	11	DrugBank:DB07617	N-METHYL(5-(PYRIDIN-3-YL)FURAN-2-YL)METHANAMINE (DrugBank:DB07617)	Experimental (DrugBank:DB07617)
D-02589	OCc1ccc(Cn2ccnc2)cc1 (TTD:D0N8QD)	OCc1ccc(cc1)Cn1cncc1	188.226	1.4237	11	TTD:D0N8QD
D-02590	OCc1cc(Cn2ccnc2)ccc1 (TTD:D08WHC)	OCc1cccc(c1)Cn1cncc1	188.226	1.4237	11	TTD:D08WHC
D-02591	O[C@@H]1CCN2C1=Nc1c(C2)cccc1 (TTD:D0R8PX)	O[C@@H]1CCN2C1=Nc1ccccc1C2	188.226	0.6703	11	TTD:D0R8PX	Vasicine (TTD:D0R8PX)				Oxytocic (TTD:D0R8PX)
D-02592	O(CCn1ccnc1)c1ccccc1 (TTD:D0R8NE)	c1ccc(cc1)OCCn1cncc1	188.226	1.9621	11	TTD:D0R8NE
D-02594	CNC(=N)NCCC[C@H](N)C(O)=O (DrugBank:DB11815)|C(CCNC(=N)NC)[C@@H](C(=O)O)N.C(=O)(C)O (KEGG:D09018)|CC(=O)O.CNC(=N)NCCC[C@@H](C(=O)O)N (TTD:D06OQI)	CNC(=N)NCCC[C@@H](C(=O)O)N	188.228	0.5041	7	DrugBank:DB11815|KEGG:D09018|TTD:D06OQI	Tilarginine (DrugBank:DB11815)|Tilarginine acetate (USAN) (KEGG:D09018)	Approved; Investigational (DrugBank:DB11815)	17035-90-4 (DrugBank:DB11815)|53308-83-1 (KEGG:D09018)		Nitric oxide synthase inhibitor (KEGG:D09018)|Myocardial infarction (TTD:D06OQI)
D-02597	OC(=O)[C@@H](N)CCCN(C)C(=N)N (TTD:D0N8EU)	OC(=O)[C@H](CCCN(C(=N)N)C)N	188.228	0.5041	7	TTD:D0N8EU
D-02602	n1(CC(N)C)c2c(cc1)cc(cc2)C (TTD:D08FUK)	CC(Cn1ccc2c1ccc(c2)C)N	188.269	2.9972	12	TTD:D08FUK
D-02605	CN(C)CCC1=CNC2=CC=CC=C12 (DrugBank:DB01488)|CN(CCc1c[nH]c2c1cccc2)C (IUPHAR:141)|N(CCc1c2c([nH]c1)cccc2)(C)C (TTD:D0K1QS)	CN(CCc1c[nH]c2c1cccc2)C	188.269	2.272	12	DrugBank:DB01488|IUPHAR:141|TTD:D0K1QS	Dimethyltryptamine (DrugBank:DB01488)|dimethyltryptamine (IUPHAR:141)	Experimental; Illicit (DrugBank:DB01488)	61-50-7 (DrugBank:DB01488)		Some people use this compound as a psychedelic inducing agent. (DrugBank:DB01488)|Synthetic organic (IUPHAR:141)
D-02606	n1(CCN(C)C)c2c(cc1)cccc2 (TTD:D0F1FN)	CN(CCn1ccc2c1cccc2)C	188.269	2.2029	12	TTD:D0F1FN
D-02607	N1C(=NCC1)Cc1c(cccc1C)C (TTD:D02EPZ)	Cc1cccc(c1CC1=NCCN1)C	188.269	1.612	12	TTD:D02EPZ
D-02608	C1CCc2c(C1)c(c1c(n2)CCC1)N.Cl.O (KEGG:D09750)	Nc1c2CCCCc2nc2c1CCC2	188.269	2.6125	12	KEGG:D09750	Ipidacrine hydrochloride hydrate (JAN) (KEGG:D09750)			N06DA05 (KEGG:D09750)	Dementia therapeutic agent, Acetylcholinesterase inhibitor (KEGG:D09750)
D-02612	CCC(C)SSC1=NC=CN1 (DrugBank:DB05448)|S(Sc1[nH]ccn1)C(CC)C (TTD:D04JTD)	CCC(SSc1ncc[nH]1)C	188.314	2.9485	7	DrugBank:DB05448|TTD:D04JTD	PX-12 (DrugBank:DB05448)	Investigational (DrugBank:DB05448)	141400-58-0 (DrugBank:DB05448)		Investigated for use/treatment in cancer/tumors (unspecified), gastric cancer, and pancreatic cancer. (DrugBank:DB05448)|Cancer (TTD:D04JTD)
D-02613	Clc1[nH]c(=O)[nH]c(=O)c1CCC (TTD:D0DX8A)	CCCc1c(Cl)[nH]c(=O)[nH]c1=O	188.612	0.6691	7	TTD:D0DX8A
D-02614	N#CC(=Cc1ccccc1Cl)C#N (IUPHAR:4158)|Clc1c(cccc1)C=C(C#N)C#N (TTD:D0S2GF)	N#CC(=Cc1ccccc1Cl)C#N	188.613	2.77056	10	IUPHAR:4158|TTD:D0S2GF	chlorobenzylidene malononitrile (IUPHAR:4158)|chlorobenzylidene malononitrile (TTD:D0S2GF)				Synthetic organic (IUPHAR:4158)
D-02615	[67Ga+3].OC(CC([O-])=O)(CC([O-])=O)C([O-])=O (DrugBank:DB06784)|[K+].[K+].[K+].OC(CC([O-])=O)(CC([O-])=O)C([O-])=O (DrugBank:DB09125)|[Na+].[Na+].[Na+].OC(CC([O-])=O)(CC([O-])=O)C([O-])=O (DrugBank:DB09154)|[Ca++].[Ca++].[Ca++].OC(CC([O-])=O)(CC([O-])=O)C([O-])=O.OC(CC([O-])=O)(CC([O-])=O)C([O-])=O (DrugBank:DB11093)|[Mg++].[Mg++].[Mg++].OC(CC([O-])=O)(CC([O-])=O)C([O-])=O.OC(CC([O-])=O)(CC([O-])…	[O-]C(=O)C(CC(=O)[O-])(CC(=O)[O-])O	189.1	-5.2526	6	DrugBank:DB06784|DrugBank:DB09125|DrugBank:DB09154|DrugBank:DB11093|DrugBank:DB11110|DrugBank:DB11154|DrugBank:DB11233|DrugBank:DB13995|DrugBank:DB14495|DrugBank:DB14507|DrugBank:DB14526|KEGG:D00933|KEGG:D01644|KEGG:D01781|KEGG:D01936|KEGG:D02464|KEGG:D03265|KEGG:D04171|KEGG:D04749|KEGG:D05578|KEGG:D05855|KEGG:D07587|KEGG:D08875|KEGG:D09739|KEGG:D09993|KEGG:D10705|KEGG:D10933|TTD:D01EKQ|TTD:D04CJ…	Gallium citrate Ga 67 (DrugBank:DB06784)|Potassium Citrate (DrugBank:DB09125)|Sodium Citrate (DrugBank:DB09154)|Calcium Citrate (DrugBank:DB11093)|Magnesium citrate (DrugBank:DB11110)|Zinc citrate (DrugBank:DB11154)|Silver citrate (DrugBank:DB11233)|Ferric pyrophosphate citrate (DrugBank:DB13995)|Manganese citrate (DrugBank:DB14495)|Lithium citrate (DrugBank:DB14507)|Chromic citrate (DrugBank:DB1…	Approved (DrugBank:DB06784)|Approved; Investigational; Vet_approved (DrugBank:DB09125)|Approved; Investigational (DrugBank:DB09154)|Approved; Investigational (DrugBank:DB11093)|Approved (DrugBank:DB11110)|Approved (DrugBank:DB11154)|Experimental (DrugBank:DB11233)|Approved; Investigational (DrugBank:DB13995)|Experimental (DrugBank:DB14495)|Approved (DrugBank:DB14507)|Experimental (DrugBank:DB1452…	41183-64-6 (DrugBank:DB06784)|68-04-2 (DrugBank:DB09154)|813-94-5 (DrugBank:DB11093)|3344-18-1 (DrugBank:DB11110)|126-45-4 (DrugBank:DB11233)|1802359-96-1 (DrugBank:DB13995)|10060-26-1 (DrugBank:DB14495)|919-16-4 (DrugBank:DB14507)|57072-40-9 (DrugBank:DB14526)|5785-44-4 (KEGG:D00933)|1185-57-5 (KEGG:D01644)|6132-04-3 (KEGG:D01781)|41183-64-6 (KEGG:D01936)|54063-42-2 (KEGG:D02464)|3344-18-1 (KEGG…	A12BA02 (DrugBank:DB09125)|B05CB02 (DrugBank:DB09154)|A11GB01; A12AA13 (DrugBank:DB11093)|A06AD19; A12CC04; B05CB03 (DrugBank:DB11110)|C05AX04 (DrugBank:DB11154)|A12AA13 (KEGG:D00933)|V08CA07 (KEGG:D01644)|B05CB02 (KEGG:D01781)|V09HX01 (KEGG:D01936)|V09XX04 (KEGG:D02464)|A06AD19; A12CC04; B05CB03 (KEGG:D03265)|N05AN01 (KEGG:D04749)|A12BA02 (KEGG:D05578)|B05CB02 (KEGG:D05855)|A02BX05 (KEGG:D07587)…	Gallium Citrate Ga 67 Injection may be useful to demonstrate the presence and extent of Hodgkin's disease, lymphoma, and bronchogenic carcinoma. Positive gallium Ga-67 uptake in the absence of prior symptoms warrants follow-up as an indication of a potential disease state. Gallium Citrate Ga 67 Injection may be useful as an aid in detecting some acute inflammatory lesions. (DrugBank:DB06784)|For …
D-02616	N[C@@H](CN1OC(=O)NC1=O)C(O)=O (DrugBank:DB02999)|OC(=O)[C@H](Cn1oc(=O)[nH]c1=O)N (IUPHAR:1370)|OC(=O)[C@H](Cn1oc(=O)[nH]c1=O)N (IUPHAR:1372)|o1n(C[C@H](N)C(=O)O)c(=O)[nH]c1=O (TTD:D06DUE)|o1n(C[C@H](N)C(=O)O)c(=O)[nH]c1=O (TTD:D0W6JO)	OC(=O)[C@H](Cn1oc(=O)[nH]c1=O)N	189.126	-1.7582	5	DrugBank:DB02999|IUPHAR:1370|IUPHAR:1372|TTD:D06DUE|TTD:D0W6JO	Quisqualate (DrugBank:DB02999)|[<sup>3</sup>H]quisqualate (IUPHAR:1370)|quisqualate (IUPHAR:1372)	Experimental (DrugBank:DB02999)|Labelled; Radioactive (IUPHAR:1370)			Synthetic organic (IUPHAR:1370)|Synthetic organic (IUPHAR:1372)
D-02619	O=C1N(C(=O)C(=O)c2c1cccc2)C (TTD:D0FZ7W)	CN1C(=O)C(=O)c2c(C1=O)cccc2	189.167	0.4194	10	TTD:D0FZ7W
D-02620	OC(=O)C1=CC(=O)C2=CC=CC=C2N1 (DrugBank:DB11937)|OC(=O)c1cc(=O)c2c([nH]1)cccc2 (IUPHAR:2918)|O=c1c2c([nH]c(c1)C(=O)O)cccc2 (TTD:D01SHB)	OC(=O)c1cc(=O)c2c([nH]1)cccc2	189.167	1.2263	10	DrugBank:DB11937|IUPHAR:2918|TTD:D01SHB	Kynurenic Acid (DrugBank:DB11937)|kynurenic acid (IUPHAR:2918)	Investigational (DrugBank:DB11937)	492-27-3 (DrugBank:DB11937)		Metabolite (IUPHAR:2918)
D-02621	OC(=O)c1ccc(c2c1cccn2)O (IUPHAR:8230)|Oc1c2ncccc2c(cc1)C(=O)O (TTD:D0X5US)	OC(=O)c1ccc(c2c1cccn2)O	189.167	1.6386	10	IUPHAR:8230|TTD:D0X5US	IOX1 (IUPHAR:8230)				Synthetic organic (IUPHAR:8230)
D-02629	[H][C@]1(O)CCN2C[C@]([H])(O)[C@@]([H])(O)[C@]([H])(O)[C@@]12[H] (DrugBank:DB01816)|O[C@@H]1[C@@H]2N(C[C@H](O)[C@H]1O)CC[C@@H]2O (TTD:D09NYB)	O[C@@H]1[C@@H](O)CN2[C@@H]([C@H]1O)[C@@H](O)CC2	189.209	-2.5442	8	DrugBank:DB01816|TTD:D09NYB	Castanospermine (DrugBank:DB01816)|CASTANOSPERMINE (TTD:D09NYB)	Experimental (DrugBank:DB01816)	79831-76-8 (DrugBank:DB01816)		Diabetes (TTD:D09NYB)
D-02637	n1(CCC=C)c2ncnc(N)c2nc1 (TTD:D0E4UT)	C=CCCn1cnc2c1ncnc2N	189.217	1.5658	9	TTD:D0E4UT
D-02638	n1(C2CCC2)c2ncnc(N)c2nc1 (TTD:D0A6JX)	Nc1ncnc2c1ncn2C1CCC1	189.217	1.7147	9	TTD:D0A6JX
D-02639	S=P(N1CC1)(N1CC1)N1CC1 (DrugBank:DB04572)|S=P(N1CC1)(N1CC1)N1CC1 (IUPHAR:7622)|P(=S)(N1CC1)(N1CC1)N1CC1 (KEGG:D00583)|S=P(N1CC1)(N1CC1)N1CC1 (TTD:D00YZA)	S=P(N1CC1)(N1CC1)N1CC1	189.218	0.622	6	DrugBank:DB04572|IUPHAR:7622|KEGG:D00583|TTD:D00YZA	Thiotepa (DrugBank:DB04572)|thiotepa (IUPHAR:7622)|Thiotepa (JAN/USP/INN) (KEGG:D00583)	Approved; Investigational (DrugBank:DB04572)|Approved (IUPHAR:7622)	52-24-4 (DrugBank:DB04572)|52-24-4 (KEGG:D00583)	L01AC01 (DrugBank:DB04572)|L01AC01 (KEGG:D00583)	ThioTEPA is used a as conditioning treatment prior to allogeneic or autologous haematopoietic progenitor cell transplantation (HPCT) in haematological diseases in adult and paediatric patients. Also, when high dose chemotherapy with HPCT support it is appropriate for the treatment of solid tumours in adult and paediatric patients. (DrugBank:DB04572)|Synthetic organic (IUPHAR:7622)|Antineoplastic,…
D-02640	CC1=C2N3C=NN=C3SC2=CC=C1 (DrugBank:DB02891)	Cc1cccc2c1n1cnnc1s2	189.237	2.2524	9	DrugBank:DB02891	Tricyclazole (DrugBank:DB02891)	Experimental; Investigational (DrugBank:DB02891)	41814-78-2 (DrugBank:DB02891)
D-02641	O=C1N(CC(CC1)c1ccccc1)C (TTD:D02ZRX)	O=C1CCC(CN1C)c1ccccc1	189.254	1.9603	12	TTD:D02ZRX
D-02643	CCCCNc1nc2c([nH]1)cccc2 (IUPHAR:10288)	CCCCNc1nc2c([nH]1)cccc2	189.257	2.8479	11	IUPHAR:10288	M084 (IUPHAR:10288)				Synthetic organic (IUPHAR:10288)
D-02645	SCC(C1CCNCC1)C(=O)O (TTD:D06TJC)	SCC(C(=O)O)C1CCNCC1	189.275	0.9454	8	TTD:D06TJC
D-02646	SCC(C1CCCNC1)C(=O)O (TTD:D00DXB)	SCC(C1CCCNC1)C(=O)O	189.275	0.9454	8	TTD:D00DXB
D-02647	[N+]1(=CCc2c1cccc2)CCN(C)C (TTD:D0ZC9Q)	CN(CC[N+]1=CCc2c1cccc2)C	189.277	1.4779	12	TTD:D0ZC9Q
D-02649	NCc1ccc(s1)c1ccccc1 (IUPHAR:8756)	NCc1ccc(s1)c1ccccc1	189.277	3.5741	11	IUPHAR:8756	compound 23 [PMID: 17125252] (IUPHAR:8756)				Synthetic organic (IUPHAR:8756)
D-02653	N1(CCCC1)CCc1ccc(cc1)C (TTD:D05ANV)	Cc1ccc(cc1)CCN1CCCC1	189.297	2.5712	13	TTD:D05ANV
D-02655	N1(CCCC1)CCc1cc(ccc1)C (TTD:D0D9JL)	Cc1cccc(c1)CCN1CCCC1	189.297	2.5712	13	TTD:D0D9JL
D-02666	Oc1c2c(c(O)cc1)C(=O)C=CC2=O (TTD:D06HXL)|Oc1c2c(c(O)cc1)C(=O)C=CC2=O (TTD:D0AS0V)	O=C1C=CC(=O)c2c1c(O)ccc2O	190.152	1.033	10	TTD:D06HXL|TTD:D0AS0V					Malaria (TTD:D0AS0V)
D-02668	o1c2c(cc(c1=O)C(=O)O)cccc2 (TTD:D0H3NS)	OC(=O)c1cc2ccccc2oc1=O	190.152	1.4912	10	TTD:D0H3NS
D-02669	o1c2c(c(=O)c(c1)C(=O)O)cccc2 (TTD:D04TGN)	OC(=O)c1coc2c(c1=O)cccc2	190.152	1.4912	10	TTD:D04TGN
D-02673	OC1=C2N=CC=CC2=C(C=C1)[N+]([O-])=O (DrugBank:DB01422)|c1ccc2c(n1)c(ccc2[N+](=O)[O-])O (KEGG:D07245)	O=N(=O)c1ccc(c2c1cccn2)O	190.156	2.3718	9	DrugBank:DB01422|KEGG:D07245	Nitroxoline (DrugBank:DB01422)|Nitroxoline (INN) (KEGG:D07245)	Experimental (DrugBank:DB01422)	4008-48-4 (DrugBank:DB01422)|4008-48-4 (KEGG:D07245)	J01XX07 (DrugBank:DB01422)|J01XX07 (KEGG:D07245)	Nitroxoline is an antibiotic agent. (DrugBank:DB01422)|Antibacterial, Antiseptic (urinary tract) (KEGG:D07245)
D-02675	O=c1n(c(=O)[nH]c2nc[nH]c12)CC#C (TTD:D0IJ2X)	C#CCn1c(=O)[nH]c2c(c1=O)[nH]cn2	190.159	-0.9539	8	TTD:D0IJ2X
D-02676	OC1=CC(=C(O)C=C1)S(O)(=O)=O (DrugBank:DB13529)|c1c(ccc(c1S(=O)(=O)O)O)O.C(C)NCC (KEGG:D01282)|S(=O)(=O)(O)c1c(O)ccc(O)c1.N(CC)CC (TTD:D0YF3X)	Oc1ccc(c(c1)S(=O)(=O)O)O	190.174	1.4253	6	DrugBank:DB13529|KEGG:D01282|TTD:D0YF3X	Dobesilic acid (DrugBank:DB13529)|Ethamsylate (USAN) (KEGG:D01282)	Experimental; Investigational (DrugBank:DB13529)	88-46-0 (DrugBank:DB13529)|2624-44-4 (KEGG:D01282)	C05BX01; C05BX51 (DrugBank:DB13529)|B02BX01 (KEGG:D01282)	Hemostatic (KEGG:D01282)|Menorrhagia (TTD:D0YF3X)
D-02677	O(c1cc2oc(=O)ccc2cc1)CC (TTD:D05VSK)	CCOc1cc2oc(=O)ccc2cc1	190.195	2.1917	11	TTD:D05VSK
D-02682	O(c1c(c2ocnc2)ccc(N)c1)C (TTD:D0L0ZP)	COc1cc(N)ccc1c1cnco1	190.199	2.5136	10	TTD:D0L0ZP
D-02687	N[C@@H](CCCNC(=N)NO)C(O)=O (DrugBank:DB03144)	ONC(=N)NCCC[C@@H](C(=O)O)N	190.2	0.2635	6	DrugBank:DB03144	N-Omega-Hydroxy-L-Arginine (DrugBank:DB03144)	Experimental (DrugBank:DB03144)
D-02696	CC(Cc1c[nH]c2c1cc(O)cc2)N (IUPHAR:152)|Oc1cc2c(CC(N)C)c[nH]c2cc1 (TTD:D09OYA)	CC(Cc1c[nH]c2c1cc(O)cc2)N	190.242	2.4635	11	IUPHAR:152|TTD:D09OYA	&alpha;-methyl-5-HT (IUPHAR:152)|alpha-methyl-5-HT (TTD:D09OYA)				Synthetic organic (IUPHAR:152)
D-02699	Oc1c2c(CN(C)C)c[nH]c2ccc1 (TTD:D05SWY)	CN(Cc1c[nH]c2c1c(O)ccc2)C	190.242	1.9351	11	TTD:D05SWY
D-02700	Cc1c(CCN)c2c([nH]1)ccc(c2)O (IUPHAR:218)|Oc1cc2c(c([nH]c2cc1)C)CCN (TTD:D00CRA)	Cc1c(CCN)c2c([nH]1)ccc(c2)O	190.242	2.3834	11	IUPHAR:218|TTD:D00CRA	2-methyl-5-HT (IUPHAR:218)|2-methyl-5-HT (TTD:D00CRA)				Synthetic organic (IUPHAR:218)
D-02702	NCCc1c[nH]c2c1cc(OC)cc2 (IUPHAR:107)|O(c1cc2c(CCN)c[nH]c2cc1)C (TTD:D04AQE)	NCCc1c[nH]c2c1cc(OC)cc2	190.242	2.378	11	IUPHAR:107|TTD:D04AQE	5-MeOT (IUPHAR:107)				Synthetic organic (IUPHAR:107)
D-02703	O=C1C=CC=C2[C@H]3CNC[C@H](C3)CN12 (DrugBank:DB09028)|O=c1cccc2n1C[C@@H]1CNC[C@H]2C1 (IUPHAR:5347)|O=c1n2C[C@H]3C[C@H](CNC3)c2ccc1 (TTD:D08XPW)	O=c1cccc2n1C[C@@H]1CNC[C@H]2C1	190.242	0.8838	11	DrugBank:DB09028|IUPHAR:5347|TTD:D08XPW	Cytisine (DrugBank:DB09028)|cytisine (IUPHAR:5347)	Experimental (DrugBank:DB09028)	485-35-8 (DrugBank:DB09028)	N07BA04 (DrugBank:DB09028)	Indicated for use in smoking cessation. (DrugBank:DB09028)|Natural product (IUPHAR:5347)
D-02704	c1cc(=O)n2c(c1)[C@@H]1C[C@@H](C2)CNC1 (KEGG:D07770)	O=c1cccc2n1C[C@H]1CNC[C@H]2C1	190.242	0.8838	11	KEGG:D07770	Cytisinicline (USAN) (KEGG:D07770)		485-35-8 (KEGG:D07770)	N07BA04 (KEGG:D07770)	Smoking cessation adjunct (KEGG:D07770)
D-02706	s1c(c2cccnc2)ccc1NC (TTD:D01ARE)	CNc1ccc(s1)c1cccnc1	190.265	2.9248	10	TTD:D01ARE
D-02707	NCc1ccc(s1)c1cccnc1 (IUPHAR:8755)	NCc1ccc(s1)c1cccnc1	190.265	2.9691	10	IUPHAR:8755	compound 38a [PMID: 15634016] (IUPHAR:8755)				Synthetic organic (IUPHAR:8755)
D-02708	s1c(c2cc(N)c(N)cc2)ccc1 (TTD:D08ZIS)	Nc1ccc(cc1N)c1cccs1	190.265	3.7419	10	TTD:D08ZIS
D-02709	c1(c(cc(cc1)c1ccsc1)N)N (TTD:D00FAY)	Nc1ccc(cc1N)c1cscc1	190.265	3.7419	10	TTD:D00FAY
D-02714	N1(CCN(CC1)C)Cc1ccccc1 (TTD:D0D8YP)	CN1CCN(CC1)Cc1ccccc1	190.285	1.3098	12	TTD:D0D8YP
D-02715	N1([C@@H](CCC1)C)CCc1ncccc1 (TTD:D0D0FV)	C[C@@H]1CCCN1CCc1ccccn1	190.285	2.0463	12	TTD:D0D0FV
D-02716	N1([C@@H](CCC1)C)CCc1cccnc1 (TTD:D01RTR)	C[C@@H]1CCCN1CCc1cccnc1	190.285	2.0463	12	TTD:D01RTR
D-02717	N1([C@@H](CCC1)C)CCc1ccncc1 (TTD:D0X6SR)	C[C@@H]1CCCN1CCc1ccncc1	190.285	2.0463	12	TTD:D0X6SR
D-02718	N1([C@H](CCC1)C)CCc1ncccc1 (TTD:D0F2XZ)	C[C@H]1CCCN1CCc1ccccn1	190.285	2.0463	12	TTD:D0F2XZ
D-02719	N1([C@H](CCC1)C)CCc1ccncc1 (TTD:D02IJW)	C[C@H]1CCCN1CCc1ccncc1	190.285	2.0463	12	TTD:D02IJW
D-02729	OC(=O)C(CCC(=O)O)C(=O)NO (TTD:D02CYQ)	ONC(=O)C(C(=O)O)CCC(=O)O	191.139	-0.5517	6	TTD:D02CYQ
D-02730	O=C1c2c(NC1=O)c(ccc2)C(=O)O (TTD:D0Y0XQ)	OC(=O)c1cccc2c1NC(=O)C2=O	191.14	0.6576	9	TTD:D0Y0XQ
D-02734	COC(=O)NC1=NC2=CC=CC=C2N1 (DrugBank:DB13009)	COC(=O)Nc1nc2c([nH]1)cccc2	191.187	1.8142	9	DrugBank:DB13009	Carbendazim (DrugBank:DB13009)	Investigational (DrugBank:DB13009)	10605-21-7 (DrugBank:DB13009)
D-02736	O(c1nc(nc2nc[nH]c12)N)CC=C (TTD:D0Z8EI)	C=CCOc1nc(N)nc2c1[nH]cn2	191.19	1.0811	8	TTD:D0Z8EI
D-02747	n1(CCCC)c2ncnc(N)c2nc1 (TTD:D04YUM)	CCCCn1cnc2c1ncnc2N	191.233	1.7898	9	TTD:D04YUM
D-02751	SCc1oc(c2cccnc2)cc1 (TTD:D0YP4A)	SCc1ccc(o1)c1cccnc1	191.25	2.7714	10	TTD:D0YP4A
D-02754	Br.S(Cc1ccc(cc1)C#N)C(=N)N (TTD:D03JMD)	N#Cc1ccc(cc1)CSC(=N)N	191.253	2.48498	9	TTD:D03JMD
D-02760	Oc1c(CCN2CCCC2)cccc1 (TTD:D05JZQ)	Oc1ccccc1CCN1CCCC1	191.269	1.9684	12	TTD:D05JZQ
D-02762	S(=O)(=O)(N1[C@@H](CCC[C@@H]1C)C)C (TTD:D09JZY)	C[C@@H]1CCC[C@@H](N1S(=O)(=O)C)C	191.291	2.2276	8	TTD:D09JZY
D-02763	C[N+]1(C)CCN(CC1)c1ccccc1 (IUPHAR:3967)|[N+]1(CCN(CC1)c1ccccc1)(C)C (TTD:D08XRH)	C[N+]1(C)CCN(CC1)c1ccccc1	191.293	1.6068	12	IUPHAR:3967|TTD:D08XRH	DMPP (IUPHAR:3967)				Synthetic organic (IUPHAR:3967)
D-02770	OC(=O)CC(O)(CC(O)=O)C(O)=O (DrugBank:DB04272)|N.[Fe+3].OC(=O)CC(O)(CC(O)=O)C(O)=O (DrugBank:DB09501)|OC(=O)C(CC(=O)O)(CC(=O)O)O (IUPHAR:2478)|OC(=O)CC(CC(=O)O)(C(=O)O)O (KEGG:D00037)|O.C(CC(=O)O)(CC(=O)O)(C(=O)O)O (KEGG:D01222)|C1CNCCN1.OC(=O)CC(CC(=O)O)(O)C(=O)O.O.C1CNCCN1.C1CNCCN1.OC(=O)CC(CC(=O)O)(O)C(=O)O (KEGG:D02127)|[N+](CC(=O)O)(C)(C)C.C(CC(=O)O)(CC(=O)O)(C(=O)O)O (KEGG:D07525)|OC(CC(=O)O…	OC(=O)C(CC(=O)O)(CC(=O)O)O	192.124	-1.2485	6	DrugBank:DB04272|DrugBank:DB09501|IUPHAR:2478|KEGG:D00037|KEGG:D01222|KEGG:D02127|KEGG:D07525|TTD:D02RTS|TTD:D0U8BN|TTD:D0W5BS	Citric Acid (DrugBank:DB04272)|Ferric ammonium citrate (DrugBank:DB09501)|citric acid (IUPHAR:2478)|Citric acid, anhydrous (USP) (KEGG:D00037)|Citric acid monohydrate (USP) (KEGG:D01222)|Piperazine citrate (USP) (KEGG:D02127)|Betaine citrate (KEGG:D07525)|citric acid (TTD:D02RTS)|FerriSeltz (TTD:D0W5BS)	Approved; Nutraceutical; Vet_approved (DrugBank:DB04272)|Approved; Experimental (DrugBank:DB09501)	77-92-9 (DrugBank:DB04272)|1185-57-5 (DrugBank:DB09501)|77-92-9 (KEGG:D00037)|5949-29-1 (KEGG:D01222)|41372-10-5 (KEGG:D02127)|17671-50-0 (KEGG:D07525)	A09AB04 (DrugBank:DB04272)|V08CA07 (DrugBank:DB09501)|A09AB04 (KEGG:D00037)|A09AB04 (KEGG:D01222)|P02CB01 (KEGG:D02127)|A16AA06 (KEGG:D07525)	Metabolite (IUPHAR:2478)|Pharmaceutic aid (buffering agent, flavor) (KEGG:D00037)|Pharmaceutic aid (buffering agent, flavor) (KEGG:D01222)|Anthelmintic (KEGG:D02127)|Choleretic, Hepatoprotectant (KEGG:D07525)|Gastrointestinal disease (TTD:D0W5BS)
D-02774	O=C1c2c(NC1=O)ccc([N+](=O)[O-])c2 (TTD:D0G2DQ)	O=C1Nc2c(C1=O)cc(cc2)N(=O)=O	192.128	1.3908	8	TTD:D0G2DQ
D-02776	o1c2c(cc(OC)c(O)c2)ccc1=O (TTD:D05QOR)	COc1cc2ccc(=O)oc2cc1O	192.168	1.5072	10	TTD:D05QOR
D-02777	o1c2c(cc(O)c(OC)c2)ccc1=O (TTD:D0E0RW)	COc1cc2oc(=O)ccc2cc1O	192.168	1.5072	10	TTD:D0E0RW
D-02783	O=c1n(CC=C)c(=O)[nH]c2nc[nH]c12 (TTD:D08FSF)	C=CCn1c(=O)[nH]c2c(c1=O)[nH]cn2	192.175	-0.4011	8	TTD:D08FSF
D-02786	O(c1cc(ccc1O)/C=C/C(=O)C)C (TTD:D05GRI)	COc1cc(/C=C/C(=O)C)ccc1O	192.211	2.003	11	TTD:D05GRI
D-02789	[O-][N+](=O)c1cc2c(CC(NC2)C)cc1 (TTD:D01SRS)	CC1NCc2c(C1)ccc(c2)N(=O)=O	192.214	2.481	10	TTD:D01SRS
D-02790	Fc1cc2n(CC(N)C)ccc2cc1 (TTD:D0KU6D)	CC(Cn1ccc2c1cc(F)cc2)N	192.233	2.8279	11	TTD:D0KU6D
D-02791	Fc1cc2c(n(CC(N)C)cc2)cc1 (TTD:D0J8RI)	CC(Cn1ccc2c1ccc(c2)F)N	192.233	2.8279	11	TTD:D0J8RI
D-02792	SCCC(CCC(=O)O)C(=O)O (TTD:D0C2FS)	SCCC(C(=O)O)CCC(=O)O	192.233	0.8719	7	TTD:D0C2FS
D-02802	COc1ccccc1N1CCNCC1 (IUPHAR:280)|O(c1c(N2CCNCC2)cccc1)C (TTD:D05ITB)|O(c1c(N2CCNCC2)cccc1)C (TTD:D0V4RP)	COc1ccccc1N1CCNCC1	192.258	1.4986	11	IUPHAR:280|TTD:D05ITB|TTD:D0V4RP	2-MPP (IUPHAR:280)				Synthetic organic (IUPHAR:280)
D-02807	C=C=CCNCCCCNCC=C=C (DrugBank:DB04188)	C=C=CCNCCCCNCC=C=C	192.301	2.4098	12	DrugBank:DB04188	MDL72527 (DrugBank:DB04188)	Experimental (DrugBank:DB04188)
D-02811	Clc1ccc(Cn2ccnc2)cc1 (TTD:D01JZO)	Clc1ccc(cc1)Cn1cncc1	192.645	2.5848	10	TTD:D01JZO
D-02813	Clc1cc(Cn2ccnc2)ccc1 (TTD:D0S4WQ)	Clc1cccc(c1)Cn1cncc1	192.645	2.5848	10	TTD:D0S4WQ
D-02816	[Na+].Fc1c(c(F)c(F)cc1F)C(=O)[O-] (TTD:D0G6OW)	Fc1cc(F)c(c(c1F)C(=O)[O-])F	193.075	0.6065	7	TTD:D0G6OW
D-02817	Clc1cc(ccc1Cl)CS (TTD:D0Z0BB)	SCc1ccc(c(c1)Cl)Cl	193.094	3.4232	7	TTD:D0Z0BB
D-02818	Clc1c(CS)ccc(Cl)c1 (TTD:D0SZ9F)	SCc1ccc(cc1Cl)Cl	193.094	3.4232	7	TTD:D0SZ9F
D-02823	[O-][N+](=O)/C=C/c1ccc2c(c1)OCO2 (IUPHAR:6048)|O1c2c(OC1)ccc(c2)/C=C/[N+](=O)[O-] (TTD:D03YUW)	O=N(=O)/C=C/c1ccc2c(c1)OCO2	193.156	2.1859	9	IUPHAR:6048|TTD:D03YUW	Syk inhibitor III (IUPHAR:6048)|SBB007833 (TTD:D03YUW)				Synthetic organic (IUPHAR:6048)
D-02824	O=c1n(c(=O)nc2n(ncnc12)C)C (TTD:D07WDQ)	O=c1nc2n(C)ncnc2c(=O)n1C	193.163	-1.5778	7	TTD:D07WDQ
D-02829	N(CC(=O)[O-])C(=O)c1ccc(cc1)N.[Na+] (KEGG:D01421)|C(=O)(NCC(=O)[O-])c1ccc(N)cc1.[Na+] (TTD:D06OAV)	O=C(c1ccc(cc1)N)NCC(=O)[O-]	193.179	-0.2794	9	KEGG:D01421|TTD:D06OAV	Aminohippurate sodium (USP) (KEGG:D01421)		94-16-6 (KEGG:D01421)	V04CH30 (KEGG:D01421)	Diagnostic aid (renal function determination) (KEGG:D01421)|Renal disease (TTD:D06OAV)
D-02831	O[C@@H]1C(NC(C(O)C1O)CO)CO (TTD:D0Q1KL)	OCC1NC(CO)[C@H](C(C1O)O)O	193.198	-3.2771	7	TTD:D0Q1KL
D-02832	O[C@]1([C@@H](O)[C@H](O)[C@@H](O)[C@@H](N)C1)CO (TTD:D08TQA)	OC[C@@]1(O)C[C@H](N)[C@@H]([C@H]([C@@H]1O)O)O	193.198	-2.7762	7	TTD:D08TQA
D-02833	O[C@@H]1[C@H](N[C@@H]([C@H](O)C1O)CO)CO (TTD:D03TYC)	OC[C@H]1N[C@H](CO)[C@H](C([C@H]1O)O)O	193.198	-3.2771	7	TTD:D03TYC
D-02837	c1cccc(c1)C(=O)NCCC(=O)O (KEGG:D01331)	O=C(c1ccccc1)NCCC(=O)O	193.199	1.282	10	KEGG:D01331	Betamipron (JP17/INN) (KEGG:D01331)		3440-28-6 (KEGG:D01331)		Suppressant (panipenem transit to renal) (KEGG:D01331)
D-02841	OC(Cn1c2ncnc(N)c2nc1)C (TTD:D0Q6KO)	CC(Cn1cnc2c1ncnc2N)O	193.206	0.3705	8	TTD:D0Q6KO
D-02844	OCCCn1c2ncnc(N)c2nc1 (TTD:D0C1PS)	OCCCn1cnc2c1ncnc2N	193.206	0.3721	8	TTD:D0C1PS
D-02847	Fc1cc2n(ncc2cc1)C[C@@H](N)C (TTD:D05JIO)	C[C@@H](Cn1ncc2c1cc(F)cc2)N	193.221	2.2229	10	TTD:D05JIO
D-02848	Fc1cc2c(n(nc2)C[C@@H](N)C)cc1 (TTD:D0Q9KP)	C[C@@H](Cn1ncc2c1ccc(c2)F)N	193.221	2.2229	10	TTD:D0Q9KP
D-02849	s1c2c(cc1C(=O)NO)cccc2 (TTD:D0D3XC)	ONC(=O)c1cc2c(s1)cccc2	193.222	2.4112	9	TTD:D0D3XC
D-02851	s1c(c(cc1)C)c1ccc(F)nc1 (TTD:D0VD5O)	Fc1ccc(cn1)c1sccc1C	193.241	3.2576	10	TTD:D0VD5O
D-02854	CCCCOC(=O)C1=CC=C(N)C=C1 (DrugBank:DB11148)|c1(C(=O)OCCCC)ccc(cc1)N (KEGG:D00730)	CCCCOC(=O)c1ccc(cc1)N	193.242	2.8069	11	DrugBank:DB11148|KEGG:D00730	Butamben (DrugBank:DB11148)|Butamben (USP) (KEGG:D00730)	Approved; Withdrawn (DrugBank:DB11148)	94-25-7 (DrugBank:DB11148)|94-25-7 (KEGG:D00730)		Butamben was indicated for the treatment of chronic pain due to its long-duration effect.[A32663] It is also indicated as a surface anesthetic for skin a mucous membrane and for the relief of pain and pruritus associated with anorectal disorders.[L2445] (DrugBank:DB11148)|Anesthetic (topical), Potassium channel blocker (KEGG:D00730)
D-02855	CNC(C)CC1=CC2=C(OCO2)C=C1 (DrugBank:DB01454)|CNC(Cc1ccc2c(c1)OCO2)C (IUPHAR:4574)|c1(cc2c(cc1)OCO2)CC(NC)C (KEGG:D11172)|O1c2cc(CC(NC)C)ccc2OC1 (TTD:D0EX3I)|O1c2cc(CC(NC)C)ccc2OC1 (TTD:D0F5NJ)	CNC(Cc1ccc2c(c1)OCO2)C	193.242	1.9566	11	DrugBank:DB01454|IUPHAR:4574|KEGG:D11172|TTD:D0EX3I|TTD:D0F5NJ	Midomafetamine (DrugBank:DB01454)|MDMA (IUPHAR:4574)|Midomafetamine (USAN/INN) (KEGG:D11172)	Experimental; Illicit; Investigational (DrugBank:DB01454)	42542-10-9 (DrugBank:DB01454)|42542-10-9 (KEGG:D11172)		Clinical trials are now testing the therapeutic potential of MDMA for post-traumatic stress disorder (PTSD) and anxiety associated with terminal cancer. MDMA is one of the four most widely used illicit drugs in the U.S. (DrugBank:DB01454)|Synthetic organic (IUPHAR:4574)|Stimulant (central), Hallucinogen (KEGG:D11172)
D-02857	O=C(NO)c1ccc(C(C)(C)C)cc1 (TTD:D03FOD)	ONC(=O)c1ccc(cc1)C(C)(C)C	193.242	2.494	11	TTD:D03FOD
D-02860	Cc1cccc(n1)C#Cc1ccccc1 (IUPHAR:1426)|n1c(cccc1C#Cc1ccccc1)C (TTD:D0IO8J)|n1c(cccc1C#Cc1ccccc1)C (TTD:D0R8TZ)	Cc1cccc(n1)C#Cc1ccccc1	193.244	2.7898	14	IUPHAR:1426|TTD:D0IO8J|TTD:D0R8TZ	MPEP (IUPHAR:1426)				Synthetic organic (IUPHAR:1426)
D-02863	n1cc(C2=Cc3c(C2)cccc3)ccc1 (TTD:D02LWB)	c1ccc(cn1)C1=Cc2c(C1)cccc2	193.244	3.1783	14	TTD:D02LWB
D-02864	c1ccc2c(c1)Cc1ccccc1C=N2 (IUPHAR:6473)|N1=Cc2c(Cc3c1cccc3)cccc2 (TTD:D01RUO)	c1ccc2c(c1)Cc1ccccc1C=N2	193.244	2.777	14	IUPHAR:6473|TTD:D01RUO	morphanthridine (IUPHAR:6473)				Synthetic organic (IUPHAR:6473)
D-02866	CO/N=C(/[C@H]1CN2CCC1CC2)\C#N (IUPHAR:306)|O(/N=C(/[C@@H]1C2CCN(C1)CC2)\C#N)C (TTD:D09FYQ)	CO/N=C(/[C@H]1CN2CCC1CC2)\C#N	193.246	0.79208	10	IUPHAR:306|TTD:D09FYQ	sabcomeline (IUPHAR:306)				Synthetic organic (IUPHAR:306)
D-02868	C(=C\C(=O)O)\C(=O)O.N1(CCC=C(C1)c1nn(nn1)CC)C (KEGG:D02876)|c1(nn(nn1)CC)C1=CCCN(C1)C (TTD:D0X8MZ)	CCn1nnc(n1)C1=CCCN(C1)C	193.249	0.3498	9	KEGG:D02876|TTD:D0X8MZ	Alvameline maleate (USAN) (KEGG:D02876)|Alvameline (TTD:D0X8MZ)		219581-36-9 (KEGG:D02876)		Dementia therapeutic agent, Muscarinic acetylcholine receptor agonist/antagonist (KEGG:D02876)|Alzheimer disease (TTD:D0X8MZ)
D-02872	O=C(C(CC#CCN1CCCC1)C)C (TTD:D06VST)	CC(C(=O)C)CC#CCN1CCCC1	193.285	1.6387	12	TTD:D06VST
D-02876	N(C1CCCCC1)CCc1[nH]cnc1 (TTD:D07TST)	C1CCC(CC1)NCCc1[nH]cnc1	193.289	2.2654	11	TTD:D07TST
D-02877	N1CCC(CC1)CCCc1[nH]cnc1 (TTD:D01CJZ)	N1CCC(CC1)CCCc1cnc[nH]1	193.289	2.0608	11	TTD:D01CJZ
D-02904	COC1=CC(\C=C\C(O)=O)=CC=C1O (DrugBank:DB07767)|O(c1cc(ccc1O)/C=C/C(=O)O)C (TTD:D03SLR)	COc1cc(/C=C/C(=O)O)ccc1O	194.184	1.4986	10	DrugBank:DB07767|TTD:D03SLR	Ferulic acid (DrugBank:DB07767)	Experimental (DrugBank:DB07767)	1135-24-6 (DrugBank:DB07767)
D-02908	NC1=CC=C(C=C1)C(=O)NCC(O)=O (DrugBank:DB00345)|O=C(c1ccc(cc1)N)NCC(=O)O (IUPHAR:4810)|c1c(ccc(c1)C(=O)NCC(=O)O)N (KEGG:D06890)|O=C(NCC(=O)O)c1ccc(N)cc1 (TTD:D04DLM)	O=C(c1ccc(cc1)N)NCC(=O)O	194.187	1.0553	9	DrugBank:DB00345|IUPHAR:4810|KEGG:D06890|TTD:D04DLM	Aminohippuric acid (DrugBank:DB00345)|aminohippuric acid (IUPHAR:4810)|Aminohippuric acid (USP) (KEGG:D06890)	Approved; Investigational (DrugBank:DB00345)|Approved (IUPHAR:4810)	61-78-9 (DrugBank:DB00345)|61-78-9 (KEGG:D06890)	V04CH30 (DrugBank:DB00345)|V04CH30 (KEGG:D06890)	Used to measure effective renal plasma flow (ERPF) and to determine the functional capacity of the tubular excretory mechanism. (DrugBank:DB00345)|Metabolite (IUPHAR:4810)|Diagnostic aid (renal function determination) (KEGG:D06890)
D-02909	CCCN1C2=C(NC=N2)C(=O)NC1=O (DrugBank:DB00824)|[nH]1c(=O)n(c2c(c1=O)[nH]cn2)CCC (KEGG:D04006)|O=c1n(CCC)c2nc[nH]c2c(=O)[nH]1 (TTD:D09AMZ)	CCCn1c(=O)[nH]c(=O)c2c1nc[nH]2	194.191	-0.1771	8	DrugBank:DB00824|KEGG:D04006|TTD:D09AMZ	Enprofylline (DrugBank:DB00824)|Enprofylline (USAN/INN) (KEGG:D04006)|Enprofylline (TTD:D09AMZ)	Approved; Experimental (DrugBank:DB00824)	41078-02-8 (DrugBank:DB00824)|41078-02-8 (KEGG:D04006)		Used in the management of symptoms of asthma. Also used in the treatment of peripheral vascular diseases and in the management of cerebrovascular insufficiency, sickle cell disease, and diabetic neuropathy. (DrugBank:DB00824)|Bronchodilator, Adenosine receptor antagonist (KEGG:D04006)|Asthma (TTD:D09AMZ)
D-02910	O=c1n(CCC)c(=O)[nH]c2nc[nH]c12 (TTD:D0LD0X)	CCCn1c(=O)[nH]c2c(c1=O)[nH]cn2	194.191	-0.1771	8	TTD:D0LD0X
D-02911	O=c1n(c(=O)n(c2nc[nH]c12)C)CC (TTD:D04WBU)	CCn1c(=O)c2[nH]cnc2n(c1=O)C	194.191	-0.5568	8	TTD:D04WBU
D-02913	CN1C=NC2=C1C(=O)N(C)C(=O)N2C (DrugBank:DB00201)|Cn1cnc2c1c(=O)n(C)c(=O)n2C (IUPHAR:407)|c12c(n(c(=O)n(c1=O)C)C)ncn2C (KEGG:D00528)|O.c12c(n(c(=O)n(c1=O)C)C)ncn2C (KEGG:D01453)|c12c(n(c(=O)n(c1=O)C)C)ncn2C.n1(c2ccccc2)c(=O)cc(n1C)C.C(CC(=O)O)(CC(=O)O)(C(=O)O)O (KEGG:D01706)|c12c(n(c(=O)n(c1=O)C)C)ncn2C.c1(ccccc1)C(=O)[O-].[Na+] (KEGG:D02409)|c12c(n(c(=O)n(c1=O)C)C)ncn2C.C(CC(=O)O)(CC(=O)O)(C(=O)O)…	Cn1cnc2c1c(=O)n(C)c(=O)n2C	194.191	-1.0293	8	DrugBank:DB00201|IUPHAR:407|KEGG:D00528|KEGG:D01453|KEGG:D01706|KEGG:D02409|KEGG:D07603|TTD:D0B3HD	Caffeine (DrugBank:DB00201)|caffeine (IUPHAR:407)|Caffeine (USP) (KEGG:D00528)|Caffeine hydrate (JP17) (KEGG:D01453)|Migrenin (JP17) (KEGG:D01706)|Caffeine and sodium benzoate (JP17) (KEGG:D02409)|Caffeine citrate (USP) (KEGG:D07603)|Caffeine (TTD:D0B3HD)	Approved (DrugBank:DB00201)|Approved (IUPHAR:407)	58-08-2 (DrugBank:DB00201)|58-08-2 (KEGG:D00528)|5743-12-4 (KEGG:D01453)|8066-49-7 (KEGG:D01706)|8000-95-1 (KEGG:D02409)|69-22-7 (KEGG:D07603)	N06BC01; R03DA20; V04CG30 (DrugBank:DB00201)|N06BC01 (KEGG:D00528)|N06BC01 (KEGG:D01453)|V04CG30 (KEGG:D02409)|N06BC01 (KEGG:D07603)	For management of fatigue, orthostatic hypotension, and for the short term treatment of apnea of prematurity in infants. (DrugBank:DB00201)|Natural product (IUPHAR:407)|Stimulant (central), Adenosine receptor antagonist, Phosphodiesterase inhibitor (KEGG:D00528)|Stimulant (central), Adenosine receptor antagonist, Phosphodiesterase inhibitor (KEGG:D01453)|Analgesic, Antipyretic (KEGG:D01706)|Stimu…
D-02920	CCCCOC(=O)C1=CC=C(O)C=C1 (DrugBank:DB14084)|c1cc(ccc1C(=O)OCCCC)O (KEGG:D01420)	CCCCOC(=O)c1ccc(cc1)O	194.227	2.3491	11	DrugBank:DB14084|KEGG:D01420	Butylparaben (DrugBank:DB14084)|Butyl parahydroxybenzoate (JP17) (KEGG:D01420)	Approved; Experimental (DrugBank:DB14084)	94-26-8 (DrugBank:DB14084)|94-26-8 (KEGG:D01420)		Pharmaceutic aid (antifungal) (KEGG:D01420)
D-02924	N[C@@H](COC(N)=O)CC1=CC=CC=C1 (DrugBank:DB14754)|N[C@H](Cc1ccccc1)COC(=O)N (IUPHAR:10342)|c1cccc(c1)C[C@H](COC(=O)N)N (KEGG:D11315)|c1cccc(c1)C[C@H](COC(=O)N)N.Cl (KEGG:D11328)	N[C@H](Cc1ccccc1)COC(=O)N	194.23	2.0523	10	DrugBank:DB14754|IUPHAR:10342|KEGG:D11315|KEGG:D11328	Solriamfetol (DrugBank:DB14754)|solriamfetol (IUPHAR:10342)|Solriamfetol (USAN) (KEGG:D11315)|Solriamfetol hydrochloride (USAN) (KEGG:D11328)	Approved (DrugBank:DB14754)|Approved (IUPHAR:10342)	178429-62-4 (DrugBank:DB14754)|178429-62-4 (KEGG:D11315)|178429-65-7 (KEGG:D11328)		Solriamfetol is indicated for treatment of daytime sleepiness associated with obstructive sleep apnea and narcolepsy, but is not a treatment for the underlying airway obstruction in apnea patients[FDA Label][A176534]. (DrugBank:DB14754)|Synthetic organic (IUPHAR:10342)|Wake-promoting agent, Noradrenalin and dopamine reuptake inhibitor (KEGG:D11315)|Wake-promoting agent, Noradrenalin and dopamine …
D-02926	n1cc(C#Cc2cc(ccc2)C)cnc1 (TTD:D0I6KU)	Cc1cccc(c1)C#Cc1cncnc1	194.232	2.1848	13	TTD:D0I6KU
D-02928	NC1=C2C=CC=CC2=NC2=C1C=CC=C2 (DrugBank:DB11561)|c1ccc2c(c1)c(c1c(n2)cccc1)N.c1c(cc(c(c1)CCCCCC)O)O (KEGG:D02759)|c1c2c(ccc1)c(c1c(n2)cccc1)N.Cl (KEGG:D02905)|Oc1c(CCCCCC)ccc(O)c1.n1c2c(c(N)c3c1cccc3)cccc2 (TTD:D04VKS)	Nc1c2ccccc2nc2c1cccc2	194.232	3.5514	13	DrugBank:DB11561|KEGG:D02759|KEGG:D02905|TTD:D04VKS	Aminacrine (DrugBank:DB11561)|Acrisorcin (USAN/INN) (KEGG:D02759)|Aminacrine hydrochloride (USAN) (KEGG:D02905)|Acrisorcin (TTD:D04VKS)	Experimental (DrugBank:DB11561)	90-45-9 (DrugBank:DB11561)|7527-91-5 (KEGG:D02759)|134-50-9 (KEGG:D02905)	D08AA02 (DrugBank:DB11561)|D08AA02 (KEGG:D02905)	Antifungal (KEGG:D02759)|Antiseptic, Disinfectant (topical) (KEGG:D02905)|Fungal infections (TTD:D04VKS)
D-02929	n1(c2c(nc1)cccc2)c1ccccc1 (TTD:D01FWD)	c1ccc(cc1)n1cnc2c1cccc2	194.232	3.0255	13	TTD:D01FWD
D-02930	n1(c2cc3c(cc2)cccc3)ccnc1 (TTD:D0G6QL)	c1ccc2c(c1)cc(cc2)n1cncc1	194.232	3.0255	13	TTD:D0G6QL
D-02931	[nH]1c(c2cc3c(cc2)cccc3)cnc1 (TTD:D07NAH)	c1ncc([nH]1)c1ccc2c(c1)cccc2	194.232	3.2299	13	TTD:D07NAH
D-02932	n1ccc(cc1)c1c[nH]c2c1cccc2 (IUPHAR:6032)|[nH]1c2c(c(c1)c1ccncc1)cccc2 (TTD:D0L0MJ)|[nH]1c2c(c(c1)c1ccncc1)cccc2 (TTD:D0Q3CE)	n1ccc(cc1)c1c[nH]c2c1cccc2	194.232	3.2299	13	IUPHAR:6032|TTD:D0L0MJ|TTD:D0Q3CE	Rho kinase inhibitor III (IUPHAR:6032)|Rockout (TTD:D0L0MJ)				Synthetic organic (IUPHAR:6032)
D-02935	c1([3H])cc([3H])c(=O)n2c1[C@H]1CNC[C@H](C1)C2 (IUPHAR:3979)|O=c1n2C[C@H]3C[C@H](CNC3)c2c(cc1[3H])[3H] (TTD:D0Y3DW)	c1([3H])cc([3H])c(=O)n2c1[C@H]1CNC[C@H](C1)C2	194.258	0.8838	11	IUPHAR:3979|TTD:D0Y3DW	[<sup>3</sup>H]cytisine (IUPHAR:3979)	Labelled; Radioactive (IUPHAR:3979)			Metabolite (IUPHAR:3979)
D-02936	CCCCCCC1=C(O)C=C(O)C=C1 (DrugBank:DB11254)|c1c(cc(c(c1)CCCCCC)O)O (KEGG:D04441)|Oc1c(CCCCCC)ccc(O)c1 (TTD:D07EGB)	CCCCCCc1ccc(cc1O)O	194.27	3.2206	12	DrugBank:DB11254|KEGG:D04441|TTD:D07EGB	Hexylresorcinol (DrugBank:DB11254)|Hexylresorcinol (USP) (KEGG:D04441)	Approved (DrugBank:DB11254)	136-77-6 (DrugBank:DB11254)|136-77-6 (KEGG:D04441)	R02AA12 (DrugBank:DB11254)|R02AA12 (KEGG:D04441)	Hexylresorcinol is predominantly employed as the active ingredient in lotions, sprays, or lozenges indicated as a (a) topical antiseptic to help prevent skin infection in minor cuts, scrapes, or burns, or (b) as an antiseptic and local anesthetic for the relief of a sore throat and its associated pain [L2734, L2735]. In addition, hexylresorcinol is used as an active ingredient in various commerci…
D-02937	O/N=C/C(CC#CCN1CCCC1)C (TTD:D0U2IL)	CC(CC#CCN1CCCC1)/C=N/O	194.273	1.5097	11	TTD:D0U2IL
D-02941	Cl.S(Cc1ccc(CC)cc1)C(=N)N (TTD:D05AFW)	CCc1ccc(cc1)CSC(=N)N	194.297	3.1757	10	TTD:D05AFW
D-02947	O(c1cc(ccc1O)/C=C/[N+](=O)[O-])C (TTD:D0O9UR)	COc1cc(ccc1O)/C=C/N(=O)=O	195.172	2.1714	9	TTD:D0O9UR
D-02948	N[C@@H](c1ccc(cc1)C(=O)O)C(=O)O (IUPHAR:1418)|OC(=O)[C@@H](N)c1ccc(cc1)C(=O)O (TTD:D0P3XO)	N[C@@H](c1ccc(cc1)C(=O)O)C(=O)O	195.172	1.1695	9	IUPHAR:1418|TTD:D0P3XO	(S)-4CPG (IUPHAR:1418)|(S)-4CPG (TTD:D0P3XO)				Synthetic organic (IUPHAR:1418)
D-02959	O1C(c2c(CC1)c(O)c(O)cc2)CN (TTD:D0U6IL)	NCC1OCCc2c1ccc(c2O)O	195.215	1.3706	10	TTD:D0U6IL
D-02967	c1ccc2c(c1)Oc1ccccc1C=N2 (IUPHAR:6472)|O1c2c(cccc2)C=Nc2c1cccc2 (TTD:D09SVQ)	c1ccc2c(c1)Oc1ccccc1C=N2	195.217	2.9785	13	IUPHAR:6472|TTD:D09SVQ	dibenzoxazepine (IUPHAR:6472)|dibenzoxazepine (TTD:D09SVQ)				Synthetic organic (IUPHAR:6472)
D-02968	o1c(c2cc3c(cc2)cccc3)cnc1 (TTD:D0L8KL)	c1ncc(o1)c1ccc2c(c1)cccc2	195.217	3.4948	13	TTD:D0L8KL
D-02969	NCCCNC1=CC=CC=C1[N+]([O-])=O (DrugBank:DB08291)	NCCCNc1ccccc1N(=O)=O	195.218	2.652	9	DrugBank:DB08291	N-(3-AMINOPROPYL)-2-NITROBENZENAMINE (DrugBank:DB08291)	Experimental (DrugBank:DB08291)
D-02970	n1c(C)cnnc1C#Cc1ccccc1 (TTD:D0EK6F)	Cc1cnnc(n1)C#Cc1ccccc1	195.22	1.5798	12	TTD:D0EK6F
D-02971	n1(C(=C)c2ccc(cc2)C#N)ccnc1 (TTD:D0N7QV)	N#Cc1ccc(cc1)C(=C)n1cncc1	195.22	2.27378	12	TTD:D0N7QV
D-02972	[nH]1c2c(nc1c1ncccc1)cccc2 (TTD:D0L4YF)	c1ccc(nc1)c1nc2c([nH]1)cccc2	195.22	2.6249	12	TTD:D0L4YF
D-02973	n1(c2cc3c(nc2)cccc3)ccnc1 (TTD:D07JCO)	c1ccc2c(c1)cc(cn2)n1cncc1	195.22	2.4205	12	TTD:D07JCO
D-02974	n1(c2cc3c(cc2)cncc3)ccnc1 (TTD:D08PKR)	c1ncc2c(c1)cc(cc2)n1cncc1	195.22	2.4205	12	TTD:D08PKR	6-Imidazol-1-yl-isoquinoline (TTD:D08PKR)
D-02980	NC(=S)N\N=C\C1=C(N)C=CC=N1 (DrugBank:DB11940)|S=C(N/N=C/c1ncccc1N)N (TTD:D0DT1R)	NC(=S)N/N=C/c1ncccc1N	195.245	1.5033	7	DrugBank:DB11940|TTD:D0DT1R	Triapine (DrugBank:DB11940)	Investigational (DrugBank:DB11940)	143621-35-6 (DrugBank:DB11940)		Nerve injury (TTD:D0DT1R)
D-02981	COC1=CC(CC(C)N)=C(OC)C=C1 (DrugBank:DB01465)|O(c1c(CC(N)C)cc(OC)cc1)C (TTD:D06PKJ)	COc1ccc(c(c1)CC(N)C)OC	195.258	2.2938	11	DrugBank:DB01465|TTD:D06PKJ	2,5-Dimethoxyamphetamine (DrugBank:DB01465)|1-(2,5-dimethoxyphenyl)propan-2-amine (TTD:D06PKJ)	Experimental; Illicit (DrugBank:DB01465)	2801-68-5 (DrugBank:DB01465)
D-02982	c1(ccc(cc1)O)C(CNC(C)C)O.Cl (KEGG:D03700)	OC(c1ccc(cc1)O)CNC(C)C	195.258	1.8145	11	KEGG:D03700	Deterenol hydrochloride (USAN) (KEGG:D03700)		23239-36-3 (KEGG:D03700)		Antiglaucoma (KEGG:D03700)
D-02983	[nH]1c2c(c3c1cccc3)ccc(c2)CC (TTD:D0H3OP)	CCc1ccc2c(c1)[nH]c1c2cccc1	195.26	3.8835	14	TTD:D0H3OP
D-02984	Cc1cccc(n1)/C=C/c1ccccc1 (IUPHAR:1432)	Cc1cccc(n1)/C=C/c1ccccc1	195.26	3.5604	14	IUPHAR:1432	SIB-1893 (IUPHAR:1432)				Synthetic organic (IUPHAR:1432)
D-02988	CC[N+](C)(C)CCCS([O-])(=O)=O (DrugBank:DB02618)	CC[N+](CCCS(=O)(=O)[O-])(C)C	195.28	1.0988	7	DrugBank:DB02618	Ethyl Dimethyl Ammonio Propane Sulfonate (DrugBank:DB02618)	Experimental (DrugBank:DB02618)
D-02990	s1cc(/C=C(/C(=N/O)/CC)\C)cc1 (TTD:D06IOP)	CC/C(=N\O)/C(=C/c1cscc1)/C	195.281	3.3916	10	TTD:D06IOP
D-02991	O=C1CCCN1CC#CC[N+](C)(C)C (IUPHAR:303)|O=C1CCCN1CC#CC[N+](C)(C)C (IUPHAR:8595)|O=C1N(CCC1)CC#CC[N+](C)(C)C (TTD:D02WTM)|O=C1N(CCC1)CC#CC[N+](C)(C)C (TTD:D0G4CG)	O=C1CCCN1CC#CC[N+](C)(C)C	195.281	0.2563	11	IUPHAR:303|IUPHAR:8595|TTD:D02WTM|TTD:D0G4CG	oxotremorine-M (IUPHAR:303)|[<sup>3</sup>H]oxotremorine-M (IUPHAR:8595)	Labelled; Radioactive (IUPHAR:8595)			Synthetic organic (IUPHAR:303)|Synthetic organic (IUPHAR:8595)
D-02995	S(c1ccc(C[C@@H](N)C)cc1)CC (TTD:D02ZZA)	CCSc1ccc(cc1)C[C@@H](N)C	195.324	3.3886	11	TTD:D02ZZA
D-02997	Clc1c2c(NC(=O)C2=O)c(cc1)C (TTD:D0B1TQ)	O=C1Nc2c(C1=O)c(Cl)ccc2C	195.602	1.9212	9	TTD:D0B1TQ
D-03000	Clc1c2CCN(CCc2ccc1)C (TTD:D06UBB)	CN1CCc2c(CC1)cccc2Cl	195.689	2.3083	11	TTD:D06UBB	SK&F-86466 (TTD:D06UBB)
D-03001	C[C@H]1CNCCC2=CC=C(Cl)C=C12 (DrugBank:DB04871)|Clc1ccc2c(c1)[C@@H](C)CNCC2 (IUPHAR:2941)|C1[C@@H](c2c(CCN1)ccc(Cl)c2)C.Cl (KEGG:D06613)|Clc1cc2[C@H](CNCCc2cc1)C (TTD:D01JMC)	Clc1ccc2c(c1)[C@@H](C)CNCC2	195.689	2.918	11	DrugBank:DB04871|IUPHAR:2941|KEGG:D06613|TTD:D01JMC	Lorcaserin (DrugBank:DB04871)|lorcaserin (IUPHAR:2941)|Lorcaserin hydrochloride (USAN) (KEGG:D06613)|Lorcaserin (TTD:D01JMC)	Approved (DrugBank:DB04871)|Approved (IUPHAR:2941)	616202-92-7 (DrugBank:DB04871)|846589-98-8 (KEGG:D06613)	A08AA11 (DrugBank:DB04871)|A08AA11 (KEGG:D06613)	For the treatment of obesity, as an adjunct to a reduced-calorie diet and increased physical activity. (DrugBank:DB04871)|Synthetic organic (IUPHAR:2941)|Appetite suppressant, Serotonin 5-HT2c receptor agonist (KEGG:D06613)|Drug abuse; Obesity (TTD:D01JMC)
D-03010	[H][C@]12CC[C@]([H])(O1)[C@]1(C)C(=O)OC(=O)[C@]21C (DrugBank:DB12328)	O=C1OC(=O)[C@@]2([C@@]1(C)[C@H]1CC[C@@H]2O1)C	196.2	0.6436	10	DrugBank:DB12328	Cantharidin (DrugBank:DB12328)	Approved; Investigational (DrugBank:DB12328)	56-25-7 (DrugBank:DB12328)		The only therapeutic use for which cantharidin is currently primarily indicated for is as an active ingredient in topical agents for treating common warts (verruca vulgaris), periungual warts, plantar warts, and molluscum contagiosum [A32891, A32892, F32]. At the same time, such topical cantharidin applications have also been used for a number of off-label indications like callus removal, cutaneo…
D-03013	O(NCC(=O)NO)Cc1ccccc1 (TTD:D00TRF)	ONC(=O)CNOCc1ccccc1	196.203	0.995	9	TTD:D00TRF
D-03014	O=C(N)c1c2ncc(cc2ccc1)C#C (TTD:D00OZA)	C#Cc1cnc2c(c1)cccc2C(=O)N	196.205	2.0153	12	TTD:D00OZA
D-03016	O=c1[nH]c2c(nccc2)c2c1cccc2 (TTD:D0M6WJ)	O=c1[nH]c2cccnc2c2c1cccc2	196.205	2.0763	12	TTD:D0M6WJ
D-03017	[nH]1c2c(nc1c1ncccc1)ccnc2 (TTD:D08AXA)	c1ccc(nc1)c1nc2c([nH]1)cncc2	196.208	2.0199	11	TTD:D08AXA
D-03021	[NH3+]CCCNc1ccccc1[N+](=O)[O-] (IUPHAR:7507)|[O-][N+](=O)c1c(NCCC[NH3+])cccc1 (TTD:D07JMJ)	[NH3+]CCCNc1ccccc1N(=O)=O	196.226	1.2349	9	IUPHAR:7507|TTD:D07JMJ	compound 1 [PMID: 15724976] (IUPHAR:7507)				Synthetic organic (IUPHAR:7507)
D-03024	O(C(=O)C1N(CCC1)C#N)C(C)(C)C (TTD:D0H8CC)	N#CN1CCCC1C(=O)OC(C)(C)C	196.246	1.21148	10	TTD:D0H8CC
D-03027	N1C(=NCC1)c1cc2c(cc1)cccc2 (TTD:D04ZPU)	C1CN=C(N1)c1ccc2c(c1)cccc2	196.248	1.954	13	TTD:D04ZPU
D-03031	n1(C2=Cc3c(CC2)cccc3)ccnc1 (TTD:D0N4VI)	c1ccc2c(c1)C=C(CC2)n1cncc1	196.248	2.8274	13	TTD:D0N4VI
D-03034	SCC(Cc1ccccc1)C(=O)O (TTD:D07CVG)	SCC(C(=O)O)Cc1ccccc1	196.266	1.8597	10	TTD:D07CVG
D-03035	[H][C@](CS)(CC1=CC=CC=C1)C(O)=O (DrugBank:DB02953)|SC[C@H](C(=O)O)Cc1ccccc1 (IUPHAR:8676)|SC[C@@H](Cc1ccccc1)C(=O)O (TTD:D0OI0B)|SC[C@@H](Cc1ccccc1)C(=O)O (TTD:D0W3UL)	SC[C@H](C(=O)O)Cc1ccccc1	196.266	1.8597	10	DrugBank:DB02953|IUPHAR:8676|TTD:D0OI0B|TTD:D0W3UL	2-Thiomethyl-3-Phenylpropanoic Acid (DrugBank:DB02953)|<i>S</i>-BMPA (IUPHAR:8676)	Experimental (DrugBank:DB02953)			Synthetic organic (IUPHAR:8676)
D-03041	O=C(N1CCC1)[C@@H](N)C1CCCCC1 (TTD:D0O9RD)	N[C@H](C(=O)N1CCC1)C1CCCCC1	196.289	1.7645	11	TTD:D0O9RD
D-03044	ClC1=CC(=CC=C1)N1CCNCC1 (DrugBank:DB12110)|Clc1cccc(c1)N1CCNCC1 (IUPHAR:142)|Clc1cc(N2CCNCC2)ccc1 (TTD:D0J6JT)|N1(CCNCC1)c1cc(ccc1)Cl (TTD:D0S5FQ)	Clc1cccc(c1)N1CCNCC1	196.677	2.1434	10	DrugBank:DB12110|IUPHAR:142|TTD:D0J6JT|TTD:D0S5FQ	m-Chlorophenylpiperazine (DrugBank:DB12110)|<i>m</i>-chlorophenylpiperazine (IUPHAR:142)|m-chlorophenylpiperazine (TTD:D0J6JT)|MCPP (TTD:D0S5FQ)	Investigational (DrugBank:DB12110)	6640-24-0 (DrugBank:DB12110)		Synthetic organic (IUPHAR:142)|Mood disorder (TTD:D0S5FQ)
D-03047	Brc1cc2[nH]ncc2cc1 (TTD:D04KUP)	Brc1ccc2c(c1)[nH]nc2	197.032	2.3254	7	TTD:D04KUP
D-03050	Brc1c2c([nH]nc2)ccc1 (TTD:D0D4US)	Brc1cccc2c1cn[nH]2	197.032	2.3254	7	TTD:D0D4US
D-03051	OC(=O)[C@](CCP(=O)(O)O)(N)C (IUPHAR:1414)|P(=O)(O)(O)CC[C@@](N)(C)C(=O)O (TTD:D09SXN)	OC(=O)[C@](CCP(=O)(O)O)(N)C	197.126	0.0565	5	IUPHAR:1414|TTD:D09SXN	MAP4 (IUPHAR:1414)				Synthetic organic (IUPHAR:1414)
D-03058	N[C@@H](CC1=CC(O)=C(O)C=C1)C(O)=O (DrugBank:DB01235)|OC(=O)[C@H](Cc1ccc(c(c1)O)O)N (IUPHAR:3639)|c1(c(ccc(c1)C[C@@H](C(=O)O)N)O)O (KEGG:D00059)|Oc1cc(C[C@H](N)C(=O)O)ccc1O (TTD:D08HVR)	OC(=O)[C@H](Cc1ccc(c(c1)O)O)N	197.188	0.7525	9	DrugBank:DB01235|IUPHAR:3639|KEGG:D00059|TTD:D08HVR	Levodopa (DrugBank:DB01235)|levodopa (IUPHAR:3639)|Levodopa (JP17/USP/INN) (KEGG:D00059)|Levodopa (TTD:D08HVR)	Approved (DrugBank:DB01235)|Approved (IUPHAR:3639)	59-92-7 (DrugBank:DB01235)|59-92-7 (KEGG:D00059)	N04BA01; N04BA02; N04BA03 (DrugBank:DB01235)|N04BA01 (KEGG:D00059)	For the treatment of idiopathic Parkinson's disease (Paralysis Agitans), postencephalitic parkinsonism, symptomatic parkinsonism which may follow injury to the nervous system by carbon monoxide intoxication, and manganese intoxication. (DrugBank:DB01235)|Metabolite (IUPHAR:3639)|Antiparkinsonian (KEGG:D00059)|Parkinson's disease (TTD:D08HVR)
D-03062	S(=O)(=O)(Nc1ccc(cc1)C#N)N (TTD:D0M4EV)	N#Cc1ccc(cc1)NS(=O)(=O)N	197.214	2.02778	7	TTD:D0M4EV
D-03063	NC/C(=C/F)/CCc1ccc(cc1)F (IUPHAR:9754)|c1c(ccc(c1)CC/C(=C\F)/CN)F.Cl (KEGG:D03733)|F/C=C(\CCc1ccc(F)cc1)/CN (TTD:D01LAC)	NC/C(=C/F)/CCc1ccc(cc1)F	197.224	3.2707	11	IUPHAR:9754|KEGG:D03733|TTD:D01LAC	mofegiline (IUPHAR:9754)|Mofegiline hydrochloride (USAN) (KEGG:D03733)		120635-25-8 (KEGG:D03733)		Synthetic organic (IUPHAR:9754)|Antiparkinsonian, Monoamine oxidase B (MAO-B) inhibitor (KEGG:D03733)|Cognitive disorders (TTD:D01LAC)
D-03065	o1cc(c2c3c(n(c2)C)cccc3)cc1 (TTD:D0J9OS)	Cn1cc(c2c1cccc2)c1cocc1	197.233	3.4383	13	TTD:D0J9OS
D-03068	OC(=O)C(CCCCN)c1[nH]cnc1 (TTD:D00GOD)	NCCCCC(c1cnc[nH]1)C(=O)O	197.234	1.4072	9	TTD:D00GOD
D-03069	N1CCN=C1c1nc2c(cc1)cccc2 (TTD:D0A4AB)	C1CN=C(N1)c1ccc2c(n1)cccc2	197.236	1.349	12	TTD:D0A4AB
D-03071	Nc1nccc(n1)/C=C/c1ccccc1 (IUPHAR:6235)|n1c(/C=C/c2ccccc2)ccnc1N (TTD:D03PGL)	Nc1nccc(n1)/C=C/c1ccccc1	197.236	2.8104	12	IUPHAR:6235|TTD:D03PGL	compound 11 [PMID: 20638279] (IUPHAR:6235)				Synthetic organic (IUPHAR:6235)
D-03073	n1(Cc2c3c([nH]c2)cccc3)ccnc1 (TTD:D00RRV)	c1ccc2c(c1)c(c[nH]2)Cn1cncc1	197.236	2.4127	12	TTD:D00RRV
D-03074	C[N+](CC#CCOC1=NOCC1)(C)C (IUPHAR:6937)|O(C1=NOCC1)CC#CC[N+](C)(C)C (TTD:D0FX4W)	C[N+](CC#CCOC1=NOCC1)(C)C	197.254	-0.118	10	IUPHAR:6937|TTD:D0FX4W	iperoxo (IUPHAR:6937)				Synthetic organic (IUPHAR:6937)
D-03075	NS(=O)(=O)C1=CC=C2CCCC2=C1 (DrugBank:DB08165)|S(=O)(=O)(N)c1cc2CCCc2cc1 (TTD:D0LC0F)|S(=O)(=O)(N)c1cc2CCCc2cc1 (TTD:D0O1LJ)	NS(=O)(=O)c1ccc2c(c1)CCC2	197.254	2.6038	9	DrugBank:DB08165|TTD:D0LC0F|TTD:D0O1LJ	indane-5-sulfonamide (DrugBank:DB08165)|2,3-dihydro-1H-indene-5-sulfonamide (TTD:D0LC0F)	Experimental (DrugBank:DB08165)
D-03076	SCC(c1cc(N)ccc1)C(=O)O (TTD:D0R2PW)	SCC(c1cccc(c1)N)C(=O)O	197.254	1.948	9	TTD:D0R2PW
D-03077	[I-].[n+]1(c2c(c3c([nH]c(c3)C)cc2)ccc1)C (TTD:D0K0TO)	Cc1[nH]c2c(c1)c1ccc[n+](c1cc2)C	197.256	2.454	13	TTD:D0K0TO
D-03081	NCC(c1ccccc1)c1ccccc1 (TTD:D0C7FL)	NCC(c1ccccc1)c1ccccc1	197.276	3.4775	14	TTD:D0C7FL
D-03085	C1CNCCN1.c1(c(cc(c(c1)Cl)Cl)Cl)O.c1(c(cc(Cl)c(c1)Cl)Cl)O (KEGG:D06224)	Clc1cc(Cl)c(cc1O)Cl	197.446	3.3524	6	KEGG:D06224	Triclofenol piperazine (USAN/INN) (KEGG:D06224)		5714-82-9 (KEGG:D06224)	P02CB01 (KEGG:D06224)	Anthelmintic (KEGG:D06224)
D-03090	c1cc(ccc1c1ccccc1)B(O)O (TTD:D09OSN)	OB(c1ccc(cc1)c1ccccc1)O	198.026	1.0334	12	TTD:D09OSN	Biphenyl-4-ylboronic acid (TTD:D09OSN)
D-03096	O(c1c(O)c(OC)cc(c1)C(=O)O)C (TTD:D0Q7DJ)	COc1cc(cc(c1O)OC)C(=O)O	198.173	1.1076	9	TTD:D0Q7DJ
D-03099	N[C@@H](CN1C=CC(=O)C(O)=C1)C(O)=O (DrugBank:DB01055)	OC(=O)[C@H](Cn1ccc(=O)c(c1)O)N	198.176	-0.3339	8	DrugBank:DB01055	Mimosine (DrugBank:DB01055)	Experimental (DrugBank:DB01055)	500-44-7 (DrugBank:DB01055)
D-03102	S(=O)(=O)(N)c1ccc(N=[N+]=[N-])cc1 (TTD:D0Z6TM)	N#N=Nc1ccc(cc1)S(=O)(=O)N	198.202	2.50966	6	TTD:D0Z6TM
D-03104	O=C1CCc2c(O1)ccc1c2cccc1 (IUPHAR:8101)|O1c2c(CCC1=O)c1c(cc2)cccc1 (TTD:D09SUO)	O=C1CCc2c(O1)ccc1c2cccc1	198.217	2.6914	13	IUPHAR:8101|TTD:D09SUO	splitomicin (IUPHAR:8101)				Synthetic organic (IUPHAR:8101)
D-03107	O=C(N)c1c2ncc(cc2ccc1)C=C (TTD:D0K7JT)	C=Cc1cnc2c(c1)cccc2C(=O)N	198.221	2.677	12	TTD:D0K7JT
D-03110	Nc1nc2c(o1)c1ccccc1c(c2)C (IUPHAR:8492)|o1c2c3c(c(cc2nc1N)C)cccc3 (TTD:D05PHX)	Nc1nc2c(o1)c1ccccc1c(c2)C	198.221	3.4528	12	IUPHAR:8492|TTD:D05PHX	SKA-121 (IUPHAR:8492)|SKA-121 (TTD:D05PHX)				Synthetic organic (IUPHAR:8492)
D-03114	OC(=O)[C@H](CCCn1ccnc1N)N (IUPHAR:8806)	OC(=O)[C@H](CCCn1ccnc1N)N	198.222	0.9389	8	IUPHAR:8806	A1P (IUPHAR:8806)				Synthetic organic (IUPHAR:8806)
D-03119	N1CCC(=CC1)c1c2c([nH]c1)cccc2 (TTD:D02MVR)	N1CCC(=CC1)c1c[nH]c2c1cccc2	198.264	2.8734	13	TTD:D02MVR
D-03121	NC1=C2CCCCC2=NC2=CC=CC=C12 (DrugBank:DB00382)|Nc1c2CCCCc2nc2c1cccc2 (IUPHAR:6687)|c12c(c(c3c(n1)CCCC3)N)cccc2.Cl (KEGG:D02068)|c12c(c(c3c(n1)CCCC3)N)cccc2 (KEGG:D08555)|n1c2c(CCCC2)c(N)c2c1cccc2 (TTD:D0E6YQ)	Nc1c2CCCCc2nc2c1cccc2	198.264	3.277	13	DrugBank:DB00382|IUPHAR:6687|KEGG:D02068|KEGG:D08555|TTD:D0E6YQ	Tacrine (DrugBank:DB00382)|tacrine (IUPHAR:6687)|Tacrine hydrochloride (USP) (KEGG:D02068)|Tacrine (INN) (KEGG:D08555)|Tacrine (TTD:D0E6YQ)	Approved; Investigational; Withdrawn (DrugBank:DB00382)|Approved (IUPHAR:6687)	321-64-2 (DrugBank:DB00382)|1684-40-8 (KEGG:D02068)|321-64-2 (KEGG:D08555)	N06DA01 (DrugBank:DB00382)|N06DA01 (KEGG:D02068)|N06DA01 (KEGG:D08555)	For the palliative treatment of mild to moderate dementia of the Alzheimer's type. (DrugBank:DB00382)|Synthetic organic (IUPHAR:6687)|Dementia therapeutic agent, Acetylcholinesterase inhibitor (KEGG:D02068)|Antidote, Curare antagonist, Dementia therapeutic agent, Acetylcholinesterase inhibitor (KEGG:D08555)|Alzheimer disease (TTD:D0E6YQ)
D-03123	CC1CCC(C1(C)C)CCCC(=O)O (IUPHAR:9112)	CC1CCC(C1(C)C)CCCC(=O)O	198.302	3.3136	12	IUPHAR:9112	GIV3727 (IUPHAR:9112)				Synthetic organic (IUPHAR:9112)
D-03129	Clc1ccc(cn1)OC[C@H]1CCN1 (IUPHAR:3989)|Clc1ncc(OC[C@@H]2NCC2)cc1 (TTD:D04HYP)	Clc1ccc(cn1)OC[C@H]1CCN1	198.649	1.8045	9	IUPHAR:3989|TTD:D04HYP	tebanicline (IUPHAR:3989)				Synthetic organic (IUPHAR:3989)
D-03130	ClC1=NC(=CN=C1)N1CCNCC1 (DrugBank:DB12111)|Clc1cncc(n1)N1CCNCC1 (IUPHAR:165)|Clc1nc(N2CCNCC2)cnc1 (TTD:D02ESW)	Clc1cncc(n1)N1CCNCC1	198.653	0.9334	8	DrugBank:DB12111|IUPHAR:165|TTD:D02ESW	MK-212 (DrugBank:DB12111)|MK-212 (IUPHAR:165)|MK-212 (TTD:D02ESW)	Investigational (DrugBank:DB12111)	64022-27-1 (DrugBank:DB12111)		Synthetic organic (IUPHAR:165)|Unspecified (TTD:D02ESW)
D-03142	N[C@@H](CN1C=CC(=O)NC1=O)C(O)=O (DrugBank:DB04129)|OC(=O)[C@@H](N)Cn1c(=O)[nH]c(=O)cc1 (TTD:D04SMQ)	OC(=O)[C@H](Cn1ccc(=O)[nH]c1=O)N	199.164	-1.3512	7	DrugBank:DB04129|TTD:D04SMQ	Willardiine (DrugBank:DB04129)	Experimental (DrugBank:DB04129)
D-03151	[nH]1c2c(c3c(nc(nc3N)N)cc2)cc1 (TTD:D0Y3TU)	Nc1nc(N)c2c(n1)ccc1c2cc[nH]1	199.212	2.4379	10	TTD:D0Y3TU
D-03152	N(c1cc2[nH]cnc2cc1)c1[nH]ccn1 (TTD:D0S4VR)	c1cnc([nH]1)Nc1ccc2c(c1)[nH]cn2	199.212	2.1026	10	TTD:D0S4VR
D-03153	Fc1cc2c3c([nH]c2cc1)cc(cc3)C (TTD:D0EC0B)	Cc1ccc2c(c1)[nH]c1c2cc(cc1)F	199.224	3.7686	13	TTD:D0EC0B
D-03154	Oc1cc2c3c([nH]c2cc1)c[n+](cc3)C (TTD:D02LWX)	C[n+]1ccc2c(c1)[nH]c1c2cc(cc1)O	199.229	1.8512	12	TTD:D02LWX
D-03158	O=C1CC2N(c3c(CC2)cccc3)C=C1 (TTD:D08SPJ)	O=C1C=CN2C(C1)CCc1c2cccc1	199.248	2.3593	13	TTD:D08SPJ
D-03159	O=C1CCN2C(=C1)CCc1c2cccc1 (TTD:D00IFJ)	O=C1CCN2C(=C1)CCc1c2cccc1	199.248	2.3609	13	TTD:D00IFJ
D-03164	NC(=NCCC[C@@H](C(=O)O)N)CC=C (IUPHAR:8830)	NC(=NCCC[C@@H](C(=O)O)N)CC=C	199.25	1.5124	9	IUPHAR:8830	compound 2e [PMID: 19013076] (IUPHAR:8830)				Synthetic organic (IUPHAR:8830)
D-03166	n1(C2CCCc3ncccc23)ccnc1 (TTD:D0K2SE)	c1cnc2c(c1)C(CCC2)n1cncc1	199.252	2.2038	12	TTD:D0K2SE
D-03170	s1c(nc(c1)C#Cc1ccccc1)C (TTD:D07QJQ)	Cc1scc(n1)C#Cc1ccccc1	199.272	2.8513	12	TTD:D07QJQ
D-03171	N1C2=CC=CC=C2SC2=CC=CC=C12 (DrugBank:DB11447)|c12c(cccc1)Sc1c(N2)cccc1 (KEGG:D02601)	c1ccc2c(c1)Sc1c(N2)cccc1	199.272	4.0328	12	DrugBank:DB11447|KEGG:D02601	Phenothiazine (DrugBank:DB11447)|Phenothiazine (INN) (KEGG:D02601)	Experimental; Vet_approved (DrugBank:DB11447)	92-84-2 (DrugBank:DB11447)|92-84-2 (KEGG:D02601)		Antiseptic, Disinfectant (KEGG:D02601)
D-03173	CCN(CC)C(=O)N1CCN(C)CC1 (DrugBank:DB00711)|N1(C(=O)N(CC)CC)CCN(CC1)C.C(CC(=O)O)(CC(=O)O)(C(=O)O)O (KEGG:D00803)|N1(C(=O)N(CC)CC)CCN(CC1)C (KEGG:D07825)|O=C(N1CCN(CC1)C)N(CC)CC (TTD:D06RCB)	CCN(C(=O)N1CCN(CC1)C)CC	199.293	0.5714	10	DrugBank:DB00711|KEGG:D00803|KEGG:D07825|TTD:D06RCB	Diethylcarbamazine (DrugBank:DB00711)|Diethylcarbamazine citrate (JP17/USP) (KEGG:D00803)|Diethylcarbamazine (INN) (KEGG:D07825)|Diethylcarbamazine (TTD:D06RCB)	Approved; Investigational; Vet_approved (DrugBank:DB00711)	90-89-1 (DrugBank:DB00711)|1642-54-2 (KEGG:D00803)|90-89-1 (KEGG:D07825)	P02CB02 (DrugBank:DB00711)|P02CB02 (KEGG:D00803)|P02CB02 (KEGG:D07825)	Used for the treatment of individual patients with certain filarial diseases including tropical pulmonary eosinophilia, loiasis, and lymphatic filariasis caused by infection with <i>Wuchereria bancrofti</i>, <i>Brugia malayi</i>, or <i>Brugia timori</i>. (DrugBank:DB00711)|Anthelmintic (KEGG:D00803)|Anthelmintic (KEGG:D07825)|Lymphatic filariasis (TTD:D06RCB)
D-03175	CC1SCC2(O1)CN1CCC2CC1 (IUPHAR:9658)	CC1SCC2(O1)CN1CCC2CC1	199.313	1.4981	10	IUPHAR:9658	cevimeline (IUPHAR:9658)	Approved (IUPHAR:9658)			Synthetic organic (IUPHAR:9658)
D-03179	NC(C(=O)O)Cc1ccc(cc1)Cl (IUPHAR:5240)|c1c(ccc(c1)CC(C(=O)O)N)Cl (KEGG:D04143)|Clc1ccc(CC(N)C(=O)O)cc1 (TTD:D0F2GG)	NC(C(=O)O)Cc1ccc(cc1)Cl	199.634	1.9947	9	IUPHAR:5240|KEGG:D04143|TTD:D0F2GG	fenclonine (IUPHAR:5240)|Fenclonine (USAN/INN) (KEGG:D04143)|fenclonine (TTD:D0F2GG)		7424-00-2 (KEGG:D04143)		Synthetic organic (IUPHAR:5240)|Carcinoid syndrome treatment, Serotonin byosynthesis inhibitor (KEGG:D04143)
D-03180	OCCNC(=O)C1=CC=C(Cl)C=C1 (DrugBank:DB08082)	OCCNC(=O)c1ccc(cc1)Cl	199.634	1.453	9	DrugBank:DB08082	N-(2-AMINOETHYL)-P-CHLOROBENZAMIDE (DrugBank:DB08082)	Experimental (DrugBank:DB08082)
D-03181	NCCNC(=O)c1ccc(cn1)Cl (IUPHAR:6640)|c1c(ccc(n1)C(=O)NCCN)Cl.Cl (KEGG:D01097)|c1c(ccc(n1)C(=O)NCCN)Cl (KEGG:D04681)|Clc1ccc(nc1)C(=O)NCCN (TTD:D06QRW)|Clc1ccc(nc1)C(=O)NCCN (TTD:D08QMF)	NCCNC(=O)c1ccc(cn1)Cl	199.637	1.5147	8	IUPHAR:6640|KEGG:D01097|KEGG:D04681|TTD:D06QRW|TTD:D08QMF	lazabemide (IUPHAR:6640)|Lazabemide hydrochloride (JAN/USAN) (KEGG:D01097)|Lazabemide (USAN/INN) (KEGG:D04681)|Lazabemide (TTD:D06QRW)		103878-83-7 (KEGG:D01097)|103878-84-8 (KEGG:D04681)		Synthetic organic (IUPHAR:6640)|Antiparkinsonian, Dementia therapeutic agent, Monoamine oxidase B (MAO-B) inhibitor (KEGG:D01097)|Antiparkinsonian, Monoamine oxidase B (MAO-B) inhibitor (KEGG:D04681)|Cognitive disorders (TTD:D06QRW)
D-03183	OCC(Br)(CO)[N+]([O-])=O (DrugBank:DB13960)|OCC([N+](=O)[O-])(CO)Br (KEGG:D01577)	OCC(N(=O)=O)(CO)Br	199.988	-0.1379	3	DrugBank:DB13960|KEGG:D01577	Bronopol (DrugBank:DB13960)|Bronopol (JAN/USAN/INN) (KEGG:D01577)	Approved (DrugBank:DB13960)	52-51-7 (DrugBank:DB13960)|52-51-7 (KEGG:D01577)		Bronopol as an active ingredient is registered as a commercial biocide and preservative in many industrial processes. Registered biocidal uses include pulp and paper mills, water cooling towers, waste water treatment, evaporative condensers, heat exchangers, food pasteurizing plants, metalworking fluids, and oilfield applications [F2317]. In addition, preservative uses include household products …
D-03184	[As](=O)([O-])([O-])c1ccccc1.[Na+].[Na+] (TTD:D0GQ9A)	[O-][As](=O)(c1ccccc1)[O-]	200.024	0.124	6	TTD:D0GQ9A
D-03189	OC1=CC(=CC(=C1O)[N+]([O-])=O)[N+]([O-])=O (DrugBank:DB02105)|Oc1c([N+](=O)[O-])cc([N+](=O)[O-])cc1O (TTD:D09AYR)	O=N(=O)c1cc(O)c(c(c1)N(=O)=O)O	200.106	1.9606	6	DrugBank:DB02105|TTD:D09AYR	3,5-Dinitrocatechol (DrugBank:DB02105)	Experimental (DrugBank:DB02105)
D-03198	o1c(c2nc(nc3[nH]ccc23)N)ccc1 (TTD:D0W5CZ)	Nc1nc(c2ccco2)c2c(n1)[nH]cc2	200.197	2.3813	10	TTD:D0W5CZ
D-03200	S(CCCC)CC(=O)C(F)(F)F (TTD:D0FO4J)	CCCCSCC(=O)C(F)(F)F	200.222	2.6511	7	TTD:D0FO4J
D-03202	O=C1CCC2Cc3c(C2=C1)ccc(O)c3 (TTD:D01AHL)	O=C1CCC2C(=C1)c1ccc(cc1C2)O	200.233	2.3108	13	TTD:D01AHL
D-03203	OC1=CC=C(OCC2=CC=CC=C2)C=C1 (DrugBank:DB00600)|Oc1ccc(cc1)OCc1ccccc1 (IUPHAR:6830)|c1ccc(cc1)COc1ccc(cc1)O (KEGG:D05072)|O(Cc1ccccc1)c1ccc(O)cc1 (TTD:D0H6TP)	Oc1ccc(cc1)OCc1ccccc1	200.233	2.9712	13	DrugBank:DB00600|IUPHAR:6830|KEGG:D05072|TTD:D0H6TP	Monobenzone (DrugBank:DB00600)|monobenzone (IUPHAR:6830)|Monobenzone (USP/INN) (KEGG:D05072)|Monobenzone (TTD:D0H6TP)	Approved (DrugBank:DB00600)|Approved (IUPHAR:6830)	103-16-2 (DrugBank:DB00600)|103-16-2 (KEGG:D05072)	D11AX13 (DrugBank:DB00600)|D11AX13 (KEGG:D05072)	Used topically to treat the loss of skin color (vitiligo). (DrugBank:DB00600)|Synthetic organic (IUPHAR:6830)|Pigmentation agent (KEGG:D05072)|Vitiligo (TTD:D0H6TP)
D-03204	S(=O)(=O)([O-])CN(c1ccccc1)C.[Na+] (TTD:D0M9IQ)	CN(c1ccccc1)CS(=O)(=O)[O-]	200.235	1.7063	8	TTD:D0M9IQ
D-03206	O=C(N)c1c2nc(CC)ccc2ccc1 (TTD:D0Z3PB)	CCc1ccc2c(n1)c(ccc2)C(=O)N	200.236	2.5964	12	TTD:D0Z3PB
D-03207	O=C(N)c1c2ncc(cc2ccc1)CC (TTD:D0UF0U)	CCc1cnc2c(c1)cccc2C(=O)N	200.236	2.5964	12	TTD:D0UF0U
D-03212	NC1=NC=CC=C1OCC1=CC=CC=C1 (DrugBank:DB02352)|O(Cc1ccccc1)c1c(nccc1)N (TTD:D09DRF)	Nc1ncccc1OCc1ccccc1	200.236	2.824	12	DrugBank:DB02352|TTD:D09DRF	3-(Benzyloxy)Pyridin-2-Amine (DrugBank:DB02352)	Experimental (DrugBank:DB02352)
D-03217	NCCC1=CC=C(C=C1)S(N)(=O)=O (DrugBank:DB08782)|S(=O)(=O)(N)c1ccc(CCN)cc1 (TTD:D04NSN)|S(=O)(=O)(N)c1ccc(CCN)cc1 (TTD:D08BZR)	NCCc1ccc(cc1)S(=O)(=O)N	200.258	2.3166	8	DrugBank:DB08782|TTD:D04NSN|TTD:D08BZR	4-(2-AMINOETHYL)BENZENESULFONAMIDE (DrugBank:DB08782)	Experimental (DrugBank:DB08782)
D-03218	s1c(nc(c1)C#Cc1ncccc1)C (TTD:D01ECL)	Cc1scc(n1)C#Cc1ccccn1	200.26	2.2463	11	TTD:D01ECL
D-03219	Cc1scc(n1)C#Cc1cccnc1 (IUPHAR:3336)|s1c(nc(c1)C#Cc1cccnc1)C (TTD:D00JLE)|s1c(nc(c1)C#Cc1cccnc1)C (TTD:D09YDQ)	Cc1scc(n1)C#Cc1cccnc1	200.26	2.2463	11	IUPHAR:3336|TTD:D00JLE|TTD:D09YDQ	MTEP (IUPHAR:3336)				Synthetic organic (IUPHAR:3336)|Autism (TTD:D09YDQ)
D-03220	s1c(nc(c1)C#Cc1ccncc1)C (TTD:D01SYO)	Cc1scc(n1)C#Cc1ccncc1	200.26	2.2463	11	TTD:D01SYO
D-03221	Nc1nc2c(s1)ccc1c2cccc1 (IUPHAR:2335)|s1c2c(nc1N)c1c(cc2)cccc1 (TTD:D0UL7R)	Nc1nc2c(s1)ccc1c2cccc1	200.26	3.6129	11	IUPHAR:2335|TTD:D0UL7R	SKA-31 (IUPHAR:2335)|SKA-31 (TTD:D0UL7R)				Synthetic organic (IUPHAR:2335)
D-03226	C1CN=C(N1)C1CCCC2=CC=CC=C12 (DrugBank:DB06764)|c1ccc2c(c1)CCCC2C1=NCCN1.O=[N+](O)[O-] (KEGG:D00756)|C1(c2c(CCC1)cccc2)C1=NCCN1.Cl (KEGG:D01023)|c1ccc2c(c1)CCCC2C1=NCCN1 (KEGG:D08578)|C1(c2c(CCC1)cccc2)C1=NCCN1 (TTD:D05IHU)	C1CN=C(N1)C1CCCc2c1cccc2	200.28	1.8726	13	DrugBank:DB06764|KEGG:D00756|KEGG:D01023|KEGG:D08578|TTD:D05IHU	Tetryzoline (DrugBank:DB06764)|Tetrahydrozoline nitrate (JAN) (KEGG:D00756)|Tetrahydrozoline hydrochloride (JAN/USP) (KEGG:D01023)|Tetryzoline (INN) (KEGG:D08578)|Tetrahydrozoline (TTD:D05IHU)	Approved (DrugBank:DB06764)	84-22-0 (DrugBank:DB06764)|522-48-5 (KEGG:D01023)|84-22-0 (KEGG:D08578)	R01AA06; R01AB03; S01GA02; S01GA52 (DrugBank:DB06764)|R01AA06; R01AB03; S01GA02 (KEGG:D00756)|R01AA06; R01AB03; S01GA02 (KEGG:D01023)|R01AA06; R01AB03; S01GA02 (KEGG:D08578)	For temporary relief of discomfort and redness of the eye due to minor eye irritations. (DrugBank:DB06764)|Vasoconstrictor, alpha1-Adrenergic receptor agonist (KEGG:D00756)|Vasoconstrictor, alpha1-Adrenergic receptor agonist (KEGG:D01023)|Vasoconstrictor, alpha1-Adrenergic receptor agonist (KEGG:D08578)|Ocular disease (TTD:D05IHU)
D-03228	Cl.c1(cccc(c1C)C(c1c[nH]cn1)C)C (KEGG:D04883)|c1(cccc(c1C)C(c1c[nH]cn1)C)C (KEGG:D08165)	Cc1cccc(c1C)C(c1c[nH]cn1)C	200.28	3.1783	13	KEGG:D04883|KEGG:D08165	Medetomidine hydrochloride (USAN) (KEGG:D04883)|Medetomidine (INN) (KEGG:D08165)		86347-15-1 (KEGG:D04883)|86347-14-0 (KEGG:D08165)		Analgesic (veterinary), Sedative (veterinary), alpha2-Adrenergic receptor agonist (KEGG:D04883)|Analgesic (veterinary), Sedative-hypnotic (veterinary), alpha2-Adrenergic receptor agonist (KEGG:D08165)
D-03229	CC(C1=CN=CN1)C1=CC=CC(C)=C1C (DrugBank:DB11428)|[nH]1c(C(c2c(c(ccc2)C)C)C)cnc1 (TTD:D0F2ML)	Cc1cccc(c1C)C(c1cnc[nH]1)C	200.28	3.1783	13	DrugBank:DB11428|TTD:D0F2ML	Medetomidine (DrugBank:DB11428)	Experimental; Vet_approved (DrugBank:DB11428)	86347-14-0 (DrugBank:DB11428)		Pain (TTD:D0F2ML)
D-03230	C[C@H](C1=CNC=N1)C1=C(C)C(C)=CC=C1 (DrugBank:DB00633)|Cc1cccc(c1C)[C@@H](c1c[nH]cn1)C (IUPHAR:521)|c1([C@@H](c2c[nH]cn2)C)c(c(ccc1)C)C (KEGG:D00514)|Cl.c1([C@@H](c2c[nH]cn2)C)c(c(ccc1)C)C (KEGG:D01205)	Cc1cccc(c1C)[C@@H](c1c[nH]cn1)C	200.28	3.1783	13	DrugBank:DB00633|IUPHAR:521|KEGG:D00514|KEGG:D01205	Dexmedetomidine (DrugBank:DB00633)|dexmedetomidine (IUPHAR:521)|Dexmedetomidine (USAN/INN) (KEGG:D00514)|Dexmedetomidine hydrochloride (JAN/USAN) (KEGG:D01205)	Approved; Vet_approved (DrugBank:DB00633)|Approved (IUPHAR:521)	113775-47-6 (DrugBank:DB00633)|113775-47-6 (KEGG:D00514)|145108-58-3 (KEGG:D01205)	N05CM18 (DrugBank:DB00633)|N05CM18 (KEGG:D00514)|N05CM18 (KEGG:D01205)	For sedation of initially intubated and mechanically ventilated patients during treatment in an intensive care setting, also used in pain relief; anxiety reduction and analgesia (DrugBank:DB00633)|Synthetic organic (IUPHAR:521)|Sedative-hypnotic, Tranquilizer, alpha2-Adrenergic receptor agonist (KEGG:D00514)|Sedative-hypnotic, Tranquilizer, alpha2-Adrenergic receptor agonist (KEGG:D01205)
D-03231	[nH]1c([C@H](c2c(c(ccc2)C)C)C)cnc1 (TTD:D0U3DU)	Cc1cccc(c1C)[C@@H](c1cnc[nH]1)C	200.28	3.1783	13	TTD:D0U3DU	Dexmedetomidine (TTD:D0U3DU)				Sedation (TTD:D0U3DU)
D-03233	n1(c2c(CCNCC2)c2c1cccc2)C (TTD:D04QRS)	Cn1c2ccccc2c2c1CCNCC2	200.28	2.1953	13	TTD:D04QRS
D-03236	c1ccc(cc1)CCCCc1cnc[nH]1 (IUPHAR:1259)|[nH]1c(CCCCc2ccccc2)cnc1 (TTD:D0B8FS)|[nH]1c(CCCCc2ccccc2)cnc1 (TTD:D0I4UU)	c1ccc(cc1)CCCCc1cnc[nH]1	200.28	2.9751	13	IUPHAR:1259|TTD:D0B8FS|TTD:D0I4UU	FUB 349 (IUPHAR:1259)|FUB 349 (TTD:D0I4UU)				Synthetic organic (IUPHAR:1259)
D-03238	CCCCCCCCCCCC(O)=O (DrugBank:DB03017)|CCCCCCCCCCCC(=O)O (IUPHAR:5534)|C(CCCCCCCC)CCC(=O)O (KEGG:D10714)|OC(=O)CCCCCCCCCCC (TTD:D0N0UC)	CCCCCCCCCCCC(=O)O	200.318	3.9919	12	DrugBank:DB03017|IUPHAR:5534|KEGG:D10714|TTD:D0N0UC	Lauric acid (DrugBank:DB03017)|lauric acid (IUPHAR:5534)|Lauric acid (NF) (KEGG:D10714)	Approved; Experimental (DrugBank:DB03017)	143-07-7 (DrugBank:DB03017)|143-07-7 (KEGG:D10714)		Metabolite (IUPHAR:5534)|Pharmaceutic aid (surfactant) (KEGG:D10714)
D-03246	Clc1ccc(CSC(=N)N)cc1.Cl (TTD:D0O9QG)	NC(=N)SCc1ccc(cc1)Cl	200.688	3.2667	8	TTD:D0O9QG
D-03247	Clc1cc(CSC(=N)N)ccc1.Cl (TTD:D07NSZ)	NC(=N)SCc1cccc(c1)Cl	200.688	3.2667	8	TTD:D07NSZ
D-03248	Clc1c(CSC(=N)N)cccc1.Cl (TTD:D02DRL)	NC(=N)SCc1ccccc1Cl	200.688	3.2667	8	TTD:D02DRL
D-03249	Brc1ccc(cc1)B(O)O (TTD:D0Z1CL)	OB(c1ccc(cc1)Br)O	200.826	0.1289	6	TTD:D0Z1CL
D-03257	o1c(c2nc(nc3nc[nH]c23)N)ccc1 (TTD:D00MPA)	Nc1nc2nc[nH]c2c(n1)c1ccco1	201.185	1.7763	9	TTD:D00MPA
D-03259	c1(ccc(cc1)C(=O)O)S(=O)(=O)N (KEGG:D09322)|S(=O)(=O)(N)c1ccc(cc1)C(=O)O (TTD:D09PWX)	OC(=O)c1ccc(cc1)S(=O)(=O)N	201.2	1.8133	7	KEGG:D09322|TTD:D09PWX	Carzenide (INN) (KEGG:D09322)|Carzenide (TTD:D09PWX)		138-41-0 (KEGG:D09322)		Diuretic (KEGG:D09322)
D-03260	CC(=O)/C=C/1\c2ccccc2N(C1=O)C (IUPHAR:6270)|O=C1N(c2c(/C/1=C\C(=O)C)cccc2)C (TTD:D0N3CZ)	CC(=O)/C=C/1\c2ccccc2N(C1=O)C	201.221	1.7004	12	IUPHAR:6270|TTD:D0N3CZ	super cinnamaldehyde (IUPHAR:6270)				Synthetic organic (IUPHAR:6270)
D-03262	N[C@@H](CSS(O)(=O)=O)C(O)=O (DrugBank:DB04370)|S(S(=O)(=O)O)C[C@H](N)C(=O)O (TTD:D00EUE)	OC(=O)[C@H](CSS(=O)(=O)O)N	201.221	0.7154	3	DrugBank:DB04370|TTD:D00EUE	S-sulphocysteine (DrugBank:DB04370)	Experimental (DrugBank:DB04370)	1637-71-4 (DrugBank:DB04370)
D-03265	O=C(Cn1ccnc1)c1ccc(N)cc1 (TTD:D0XS6T)	Nc1ccc(cc1)C(=O)Cn1cncc1	201.225	1.9294	11	TTD:D0XS6T
D-03266	NC(=N)Nc1nc2ccccc2c(n1)C (IUPHAR:4203)	NC(=N)Nc1nc2ccccc2c(n1)C	201.228	2.1166	10	IUPHAR:4203	GMQ (IUPHAR:4203)				Synthetic organic (IUPHAR:4203)
D-03270	S(=O)(=O)(N)c1ccc(N(N)C)cc1 (TTD:D0M7VN)	CN(c1ccc(cc1)S(=O)(=O)N)N	201.246	2.1253	7	TTD:D0M7VN
D-03271	s1c(nc(c1)C#Cc1nccnc1)C (TTD:D07RRA)	Cc1scc(n1)C#Cc1cnccn1	201.248	1.6413	10	TTD:D07RRA
D-03272	s1c(nc(c1)C#Cc1cncnc1)C (TTD:D03NIO)	Cc1scc(n1)C#Cc1cncnc1	201.248	1.6413	10	TTD:D03NIO
D-03273	s1c(nc(c1)C#Cc1cccnc1)N (TTD:D01UUH)	Nc1scc(n1)C#Cc1cccnc1	201.248	2.1013	10	TTD:D01UUH
D-03274	N1C2=CC=CC=C2N=C1C1=CSC=N1 (DrugBank:DB00730)|c1scc(n1)c1nc2c([nH]1)cccc2 (IUPHAR:7304)|c1(c2cscn2)[nH]c2c(n1)cccc2 (KEGG:D00372)|s1cc(nc1)c1[nH]c2c(n1)cccc2 (TTD:D08QCJ)	c1scc(n1)c1nc2c([nH]1)cccc2	201.248	2.6864	10	DrugBank:DB00730|IUPHAR:7304|KEGG:D00372|TTD:D08QCJ	Thiabendazole (DrugBank:DB00730)|thiabendazole (IUPHAR:7304)|Thiabendazole (USP) (KEGG:D00372)|Thiabendazole (TTD:D08QCJ)	Approved; Vet_approved (DrugBank:DB00730)|Approved (IUPHAR:7304)	148-79-8 (DrugBank:DB00730)|148-79-8 (KEGG:D00372)	D01AC06; P02CA02 (DrugBank:DB00730)|D01AC06; P02CA02 (KEGG:D00372)	For the treatment of strongyloidiasis (threadworm), cutaneous larva migrans (creeping eruption), visceral larva migrans, and trichinosis. (DrugBank:DB00730)|Synthetic organic (IUPHAR:7304)|Anthelmintic, Antifungal (KEGG:D00372)|Dutch elm disease; Helminth infection (TTD:D08QCJ)
D-03275	O=C(CCCC[C@@H](C)C(=O)O)[C@@H](N)C (TTD:D0SZ9E)	C[C@@H](C(=O)O)CCCCC(=O)[C@@H](N)C	201.263	1.8841	10	TTD:D0SZ9E
D-03276	Oc1c2c(c(NC(C)C)cc1)cccc2 (TTD:D0S1FF)	CC(Nc1ccc(c2c1cccc2)O)C	201.264	3.4387	13	TTD:D0S1FF
D-03277	Oc1c2c(c(NCCC)cc1)cccc2 (TTD:D08MRL)	CCCNc1ccc(c2c1cccc2)O	201.264	3.4403	13	TTD:D08MRL
D-03278	O=C1NC2C(CCCC2)c2c1cccc2 (TTD:D0FF4M)	O=C1NC2CCCCC2c2c1cccc2	201.264	2.785	13	TTD:D0FF4M
D-03281	N(CCc1[nH]cnc1)c1ccc(cc1)C (TTD:D0M2HC)	Cc1ccc(cc1)NCCc1[nH]cnc1	201.268	2.4457	12	TTD:D0M2HC
D-03282	N(C1CCCCC1)c1nc(ccc1)C#N (TTD:D0FC7L)	N#Cc1cccc(n1)NC1CCCCC1	201.268	2.77088	12	TTD:D0FC7L
D-03283	N1(CCNCC1)c1c2c([nH]cc2)ccc1 (TTD:D0TX8W)	N1CCN(CC1)c1cccc2c1cc[nH]2	201.268	1.9713	12	TTD:D0TX8W
D-03284	CC1=NNC=C1C1=CC=C(CCN)C=C1 (DrugBank:DB08070)	NCCc1ccc(cc1)c1c[nH]nc1C	201.268	2.5866	12	DrugBank:DB08070	2-[4-(3-METHYL-1H-PYRAZOL-4-YL)PHENYL]ETHANAMINE (DrugBank:DB08070)	Experimental (DrugBank:DB08070)
D-03292	ClC1=CC=C2CCNCC2=C1Cl (DrugBank:DB08550)|Clc1c2c(CCNC2)ccc1Cl.Cl (TTD:D0C9DC)	Clc1ccc2c(c1Cl)CNCC2	202.08	2.9679	9	DrugBank:DB08550|TTD:D0C9DC	7,8-Dichloro-1,2,3,4-tetrahydroisoquinoline (DrugBank:DB08550)|SK&F-64139 (TTD:D0C9DC)	Experimental (DrugBank:DB08550)	61563-24-4 (DrugBank:DB08550)
D-03295	o1c2c(c(O)c3c(oc(=O)cc3)c2)cc1 (TTD:D0D5YP)	O=c1ccc2c(o1)cc1c(c2O)cco1	202.163	2.2448	11	TTD:D0D5YP
D-03296	Oc1cc(cc(O)c1O)C=C(C#N)C#N (TTD:D02BUW)	N#CC(=Cc1cc(O)c(c(c1)O)O)C#N	202.166	1.23396	10	TTD:D02BUW
D-03299	S(=O)(=O)(N)c1ccc([N+](=O)[O-])cc1 (TTD:D06LVE)	O=N(=O)c1ccc(cc1)S(=O)(=O)N	202.188	2.5465	6	TTD:D06LVE
D-03300	S(=O)(=O)(N)c1cc([N+](=O)[O-])ccc1 (TTD:D07ZHE)	O=N(=O)c1cccc(c1)S(=O)(=O)N	202.188	2.5465	6	TTD:D07ZHE
D-03301	O(C1=CC(=O)C(=O)c2c1cccc2)CC (TTD:D07REK)	CCOC1=CC(=O)C(=O)c2c1cccc2	202.206	1.8294	12	TTD:D07REK
D-03306	Cc1cccc(c1)Oc1cnc(=O)[nH]c1 (IUPHAR:9433)|c1(cccc(c1)Oc1c[nH]c(=O)nc1)C (KEGG:D06182)|O(c1cc(ccc1)C)c1c[nH]c(=O)nc1 (TTD:D0ZU4U)	Cc1cccc(c1)Oc1cnc(=O)[nH]c1	202.209	1.8706	11	IUPHAR:9433|KEGG:D06182|TTD:D0ZU4U	tolimidone (IUPHAR:9433)|Tolimidone (USAN) (KEGG:D06182)|MLR-1023 (TTD:D0ZU4U)		41964-07-2 (KEGG:D06182)		Synthetic organic (IUPHAR:9433)|Anti-ulcerative, Lyn kinase activator (KEGG:D06182)|Obesity (TTD:D0ZU4U)
D-03308	OC(=O)c1n[nH]c(Cc2ccccc2)c1 (TTD:D00TPG)	OC(=O)c1cc([nH]n1)Cc1ccccc1	202.209	1.6987	11	TTD:D00TPG
D-03310	S(=O)(=O)(N)c1c(OCC)ccnc1 (TTD:D04VSP)	CCOc1ccncc1S(=O)(=O)N	202.231	1.9088	7	TTD:D04VSP
D-03311	S(=O)(=O)(Nc1ccc(OC)cc1)N (TTD:D0T8SN)	COc1ccc(cc1)NS(=O)(=O)N	202.231	2.1647	7	TTD:D0T8SN
D-03313	S(=O)(=O)(N)c1c(NNC)ccnc1 (TTD:D0Q5VB)	CNNc1ccncc1S(=O)(=O)N	202.234	1.5203	6	TTD:D0Q5VB
D-03318	O(C(C)C)c1c2nc(N)ccc2ccc1 (TTD:D08OQO)	CC(Oc1cccc2c1nc(N)cc2)C	202.252	3.1854	12	TTD:D08OQO
D-03319	O(c1c2nc(N)ccc2ccc1)CCC (TTD:D0LJ4Q)	CCCOc1cccc2c1nc(N)cc2	202.252	3.187	12	TTD:D0LJ4Q
D-03321	CN(C)CC1=CC=C(O1)C1=CC=CN=C1 (DrugBank:DB07609)	CN(Cc1ccc(o1)c1cccnc1)C	202.252	2.4032	12	DrugBank:DB07609	N,N-DIMETHYL(5-(PYRIDIN-3-YL)FURAN-2-YL)METHANAMINE (DrugBank:DB07609)	Experimental (DrugBank:DB07609)
D-03322	O(c1cc2[nH]c3c(CCNC3)c2cc1)C (TTD:D05GDP)	COc1ccc2c(c1)[nH]c1c2CCNC1	202.252	2.151	12	TTD:D05GDP
D-03323	O(c1cc2c3c([nH]c2cc1)CNCC3)C (TTD:D0J3SN)	COc1ccc2c(c1)c1CCNCc1[nH]2	202.252	2.151	12	TTD:D0J3SN
D-03327	O(CCCc1[nH]cnc1)c1ccccc1 (TTD:D0R2TU)	c1ccc(cc1)OCCCc1cnc[nH]1	202.252	2.4213	12	TTD:D0R2TU
D-03331	N(C1CCCCC1)c1nc(ccn1)C#N (TTD:D04QHB)	N#Cc1ccnc(n1)NC1CCCCC1	202.256	2.16588	11	TTD:D04QHB
D-03332	N(C1CCCCC1)c1nc(ncc1)C#N (TTD:D06AZJ)	N#Cc1nccc(n1)NC1CCCCC1	202.256	2.16588	11	TTD:D06AZJ
D-03335	CCCCn1c(=O)sn(c1=O)CC (IUPHAR:8033)|s1n(c(=O)n(CCCC)c1=O)CC (TTD:D05AMQ)	CCCCn1c(=O)sn(c1=O)CC	202.274	0.8915	8	IUPHAR:8033|TTD:D05AMQ	RGS4 inhibitor 11b (IUPHAR:8033)|thiadiazolidinone (TDZD) deriv. 6 (TTD:D05AMQ)				Synthetic organic (IUPHAR:8033)
D-03336	s1c(nc(/C=C/c2cccnc2)c1)C (TTD:D0TW0I)	Cc1scc(n1)/C=C/c1cccnc1	202.275	3.0169	11	TTD:D0TW0I
D-03337	C(=N)(c1sccc1)Nc1ccccc1 (TTD:D0NA8W)	N=C(c1cccs1)Nc1ccccc1	202.276	3.3583	11	TTD:D0NA8W	LTA (TTD:D0NA8W)				Pain (TTD:D0NA8W)
D-03340	N1C(=NCC1)c1ccc(C(C)(C)C)cc1 (TTD:D0P4KF)	CC(c1ccc(cc1)C1=NCCN1)(C)C	202.295	2.0983	13	TTD:D0P4KF
D-03341	N(CCCc1c2c([nH]c1)cccc2)(C)C (TTD:D00RTM)	CN(CCCc1c[nH]c2c1cccc2)C	202.295	2.6621	13	TTD:D00RTM
D-03342	NCCc1cn(c2c1cccc2)C(C)C (IUPHAR:159)|n1(C(C)C)c2c(c(c1)CCN)cccc2 (TTD:D0ZF1W)	NCCc1cn(c2c1cccc2)C(C)C	202.295	3.4237	13	IUPHAR:159|TTD:D0ZF1W	<i>N</i>-1-isopropyltryptamine (IUPHAR:159)				Synthetic organic (IUPHAR:159)
D-03343	S1CN(C(=O)[C@@H](N)[C@H](CC)C)CC1.OC(=O)/C=C/C(=O)O (TTD:D0H2IO)|S1CN(C(=O)[C@@H](N)[C@H](CC)C)CC1 (TTD:D0N1FU)	CC[C@@H]([C@@H](C(=O)N1CSCC1)N)C	202.317	1.5309	9	TTD:D0H2IO|TTD:D0N1FU					Autism (TTD:D0H2IO)
D-03344	NCCCNCCCCNCCCN (DrugBank:DB00127)|NCCCNCCCCNCCCN (IUPHAR:710)|N(CCCCNCCCN)CCCN (TTD:D0LD9S)	NCCCNCCCCNCCCN	202.34	1.8258	10	DrugBank:DB00127|IUPHAR:710|TTD:D0LD9S	Spermine (DrugBank:DB00127)|spermine (IUPHAR:710)	Experimental; Nutraceutical (DrugBank:DB00127)	71-44-3 (DrugBank:DB00127)		For nutritional supplementation, also for treating dietary shortage or imbalance (DrugBank:DB00127)|Metabolite (IUPHAR:710)
D-03346	ClC1=C(C=C(C=C1)N(=O)=O)N(=O)=O (DrugBank:DB11831)|Clc1c([N+](=O)[O-])cc([N+](=O)[O-])cc1 (TTD:D0QG8F)	O=N(=O)c1ccc(c(c1)N(=O)=O)Cl	202.552	3.2028	6	DrugBank:DB11831|TTD:D0QG8F	Dinitrochlorobenzene (DrugBank:DB11831)|DNCB (TTD:D0QG8F)	Investigational (DrugBank:DB11831)	97-00-7 (DrugBank:DB11831)		Immuno-modulator (TTD:D0QG8F)
D-03348	Clc1[nH]c(=O)[nH]c(=O)c1CCCC (TTD:D0RE9X)	CCCCc1c(Cl)[nH]c(=O)[nH]c1=O	202.638	1.0592	8	TTD:D0RE9X
D-03351	N[C@@H](C1[C@H]([C@@H]1C(=O)O)C(=O)O)C(=O)O (IUPHAR:1377)|OC(=O)[C@@H]1C([C@H]1C(=O)O)[C@H](N)C(=O)O (TTD:D0Y1WV)	N[C@@H](C1[C@H]([C@@H]1C(=O)O)C(=O)O)C(=O)O	203.149	-0.87	7	IUPHAR:1377|TTD:D0Y1WV	DCG-IV (IUPHAR:1377)				Synthetic organic (IUPHAR:1377)
D-03360	[O-][N+](=O)c1ccc(Cn2ccnc2)cc1 (TTD:D0S0EP)	O=N(=O)c1ccc(cc1)Cn1cncc1	203.197	2.3628	10	TTD:D0S0EP
D-03361	CC(Cc1cccc(c1)C(F)(F)F)N (IUPHAR:215)|FC(F)(F)c1cc(CC(N)C)ccc1 (TTD:D0N6AY)	CC(Cc1cccc(c1)C(F)(F)F)N	203.204	3.2954	10	IUPHAR:215|TTD:D0N6AY	norfenfluramine (IUPHAR:215)|norfenfluramine (TTD:D0N6AY)				Synthetic organic (IUPHAR:215)
D-03362	C[C@@H](Cc1cccc(c1)C(F)(F)F)N (IUPHAR:216)|FC(F)(F)c1cc(C[C@@H](N)C)ccc1 (TTD:D0U7BH)	C[C@@H](Cc1cccc(c1)C(F)(F)F)N	203.204	3.2954	10	IUPHAR:216|TTD:D0U7BH	(+)-norfenfluramine (IUPHAR:216)|(+)-norfenfluramine (TTD:D0U7BH)				Synthetic organic (IUPHAR:216)
D-03363	C[C@H](Cc1cccc(c1)C(F)(F)F)N (IUPHAR:217)|FC(F)(F)c1cc(C[C@H](N)C)ccc1 (TTD:D0H3MO)	C[C@H](Cc1cccc(c1)C(F)(F)F)N	203.204	3.2954	10	IUPHAR:217|TTD:D0H3MO	(-)-norfenfluramine (IUPHAR:217)				Synthetic organic (IUPHAR:217)
D-03365	OC(=O)[C@H]1C2C1[C@](CS2)(N)C(=O)O (IUPHAR:3349)|S1C2C([C@H]2C(=O)O)[C@@](N)(C1)C(=O)O (TTD:D06PAK)	OC(=O)[C@H]1C2C1[C@](CS2)(N)C(=O)O	203.216	-0.0852	7	IUPHAR:3349|TTD:D06PAK	LY389795 (IUPHAR:3349)				Synthetic organic (IUPHAR:3349)
D-03366	s1c(Nc2ncncc2)ncc1C#N (TTD:D0J3OZ)	N#Cc1cnc(s1)Nc1ccncn1	203.224	1.62138	8	TTD:D0J3OZ
D-03367	NCCC1=CC=C(C=C1)S(F)(=O)=O (DrugBank:DB07347)	NCCc1ccc(cc1)S(=O)(=O)F	203.234	2.6271	8	DrugBank:DB07347	4-(2-Aminoethyl)Benzenesulfonyl Fluoride (DrugBank:DB07347)	Experimental (DrugBank:DB07347)	34284-75-8 (DrugBank:DB07347)
D-03374	O(c1c2n(c(=O)cc(c2ccc1)C)C)C (TTD:D0L3AJ)	COc1cccc2c1n(C)c(=O)cc2C	203.237	1.8555	12	TTD:D0L3AJ
D-03375	O=C1N(C(=O)C1(C)C)Cc1ccccc1 (TTD:D07HLC)	O=C1N(Cc2ccccc2)C(=O)C1(C)C	203.237	1.5195	12	TTD:D07HLC
D-03377	CN[C@H]1CN2C(=O)NC3=CC=CC(C1)=C23 (DrugBank:DB06477)|CN[C@@H]1Cc2cccc3c2n(C1)c(=O)[nH]3 (IUPHAR:3949)|O=c1n2C[C@H](NC)Cc3c2c([nH]1)ccc3 (TTD:D07YVK)	CN[C@@H]1Cc2cccc3c2n(C1)c(=O)[nH]3	203.24	0.8646	11	DrugBank:DB06477|IUPHAR:3949|TTD:D07YVK	Sumanirole (DrugBank:DB06477)|sumanirole (IUPHAR:3949)|Sumanirole (TTD:D07YVK)	Investigational (DrugBank:DB06477)	179386-43-7 (DrugBank:DB06477)		Investigated for use/treatment in parkinson's disease. (DrugBank:DB06477)|Synthetic organic (IUPHAR:3949)|Parkinson's disease (TTD:D07YVK)
D-03378	o1c2c(c(N3CCNCC3)ncc2)cc1 (TTD:D04VXP)	N1CCN(CC1)c1nccc2c1cco2	203.24	1.6312	11	TTD:D04VXP
D-03380	NCC(=O)NC(Cc1ccccc1)C#N (IUPHAR:8622)|O=C(NC(Cc1ccccc1)C#N)CN (TTD:D0IV5D)	NCC(=O)NC(Cc1ccccc1)C#N	203.24	1.28738	11	IUPHAR:8622|TTD:D0IV5D	compound 3d [PMID: 3941405] (IUPHAR:8622)				Synthetic organic (IUPHAR:8622)
D-03381	O=C(N[C@@H](Cc1ccccc1)C#N)CN (TTD:D0U4TA)	NCC(=O)N[C@@H](Cc1ccccc1)C#N	203.24	1.28738	11	TTD:D0U4TA
D-03382	NCCc1c[nH]c2c1cc(cc2)C(=O)N (IUPHAR:4)|O=C(N)c1cc2c(CCN)c[nH]c2cc1 (TTD:D02UWB)	NCCc1c[nH]c2c1cc(cc2)C(=O)N	203.24	2.1686	11	IUPHAR:4|TTD:D02UWB	5-CT (IUPHAR:4)|5-CT (TTD:D02UWB)				Synthetic organic (IUPHAR:4)
D-03386	N1(CCNCC1)c1nccn2c1ncc2 (TTD:D0E5CI)	N1CCN(CC1)c1nccn2c1ncc2	203.244	0.5327	10	TTD:D0E5CI
D-03387	N1(CCNCC1)c1ncnc2[nH]ccc12 (TTD:D08YZM)	N1CCN(CC1)c1ncnc2c1cc[nH]2	203.244	0.7613	10	TTD:D08YZM
D-03388	n1(C2CCCC2)c2ncnc(N)c2nc1 (TTD:D0B3UE)	Nc1ncnc2c1ncn2C1CCCC1	203.244	2.1048	10	TTD:D0B3UE	9-Cyclopentyl-9H-adenine (TTD:D0B3UE)
D-03393	N1(CC2(NCCC2)CC1)c1cnccc1 (TTD:D00EZO)	c1ccc(cn1)N1CCC2(C1)CCCN2	203.283	1.8077	12	TTD:D00EZO	TC-2216 (TTD:D00EZO)				Mood disorder (TTD:D00EZO)
D-03396	N1([C@H](CCC1)C)CCc1ccc(cc1)C (TTD:D0P8UI)	Cc1ccc(cc1)CCN1CCC[C@@H]1C	203.323	2.9597	14	TTD:D0P8UI
D-03397	N1([C@@H](CCC1)C)CCc1ccc(cc1)C (TTD:D05PBN)	Cc1ccc(cc1)CCN1CCC[C@H]1C	203.323	2.9597	14	TTD:D05PBN
D-03398	N1([C@H](CCC1)C)CCc1cc(ccc1)C (TTD:D0UW9I)	Cc1cccc(c1)CCN1CCC[C@@H]1C	203.323	2.9597	14	TTD:D0UW9I
D-03399	N1([C@@H](CCC1)C)CCc1cc(ccc1)C (TTD:D04NWI)	Cc1cccc(c1)CCN1CCC[C@H]1C	203.323	2.9597	14	TTD:D04NWI
D-03400	S1CN(C(=O)[C@@H]([NH3+])[C@H](CC)C)CC1 (TTD:D0T6TW)	CC[C@@H]([C@@H](C(=O)N1CSCC1)[NH3+])C	203.325	0.1138	9	TTD:D0T6TW					Chronic obstructive pulmonary disease (TTD:D0T6TW)
D-03404	P(=O)(O)(O)CCCP(=O)(O)O (TTD:D0G6CU)	OP(=O)(CCCP(=O)(O)O)O	204.055	-0.2681	3	TTD:D0G6CU
D-03408	o1c2c(cc(cc2)C)cc(c1=O)C(=O)O (TTD:D0G3BI)	Cc1ccc2c(c1)cc(c(=O)o2)C(=O)O	204.179	1.7996	11	TTD:D0G3BI
D-03409	o1c2c(c(O)ccc2ccc1=O)C(=O)C (TTD:D0K1FG)	O=c1ccc2c(o1)c(C(=O)C)c(cc2)O	204.179	1.7012	11	TTD:D0K1FG
D-03410	o1c2c(cc(c(O)c2)C(=O)C)ccc1=O (TTD:D02MAK)	O=c1ccc2c(o1)cc(c(c2)C(=O)C)O	204.179	1.7012	11	TTD:D02MAK
D-03412	o1c2c(cc(c1=O)C(=O)C)ccc(O)c2 (TTD:D09BVA)	Oc1ccc2c(c1)oc(=O)c(c2)C(=O)C	204.179	1.7012	11	TTD:D09BVA
D-03413	Oc1cc(ccc1O)/C=C(/C(=O)N)\C#N (TTD:D01NTW)	N#C/C(=C\c1ccc(c(c1)O)O)/C(=O)N	204.182	1.19038	10	TTD:D01NTW
D-03416	O(CCC)c1cc2oc(=O)ccc2cc1 (TTD:D0OT5L)	CCCOc1ccc2c(c1)oc(=O)cc2	204.222	2.5818	12	TTD:D0OT5L
D-03421	O=C(NO)CCCCCCC(=O)NO (TTD:D07YZZ)	ONC(=O)CCCCCCC(=O)NO	204.224	1.1196	8	TTD:D07YZZ	Octanedioic acid bis-hydroxyamide (TTD:D07YZZ)
D-03422	C1CN=C(N1)C1COC2=CC=CC=C2O1 (DrugBank:DB12551)|Cl.O1C(C2=NCCN2)COc2c1cccc2 (TTD:D01ZNH)	C1CN=C(N1)C1COc2c(O1)cccc2	204.225	0.5925	11	DrugBank:DB12551|TTD:D01ZNH	Idazoxan (DrugBank:DB12551)	Investigational (DrugBank:DB12551)	79944-58-4 (DrugBank:DB12551)		Neurological disease (TTD:D01ZNH)
D-03423	o1c(nc2ncccc12)C(=O)CCCC (TTD:D02IQP)	CCCCC(=O)c1nc2c(o1)cccn2	204.225	2.5957	11	TTD:D02IQP
D-03428	O=C1N(C(=O)CC1c1ccc(N)cc1)C (TTD:D01MPK)	CN1C(=O)CC(C1=O)c1ccc(cc1)N	204.225	1.2602	11	TTD:D01MPK
D-03431	O=C1NC(=O)CC1(c1ccc(N)cc1)C (TTD:D05HRP)	O=C1NC(=O)CC1(C)c1ccc(cc1)N	204.225	1.483	11	TTD:D05HRP
D-03432	N[C@H](CC1=CNC2=CC=CC=C12)C(O)=O (DrugBank:DB03225)|OC(=O)[C@@H](Cc1c[nH]c2c1cccc2)N (IUPHAR:5798)|OC(=O)[C@H](N)Cc1c2c([nH]c1)cccc2 (TTD:D08CBB)	OC(=O)[C@@H](Cc1c[nH]c2c1cccc2)N	204.225	1.8226	11	DrugBank:DB03225|IUPHAR:5798|TTD:D08CBB	D-Tryptophan (DrugBank:DB03225)|D-tryptophan (IUPHAR:5798)	Experimental (DrugBank:DB03225)	153-94-6 (DrugBank:DB03225)		Synthetic organic (IUPHAR:5798)
D-03433	N[C@@H](CC1=CNC2=CC=CC=C12)C(O)=O (DrugBank:DB00150)|OC(=O)[C@H](Cc1c[nH]c2c1cccc2)N (IUPHAR:717)|c12c(C[C@H](N)C(=O)O)c[nH]c1cccc2 (KEGG:D00020)|OC(=O)[C@@H](N)Cc1c2c([nH]c1)cccc2 (TTD:D05EJG)	OC(=O)[C@H](Cc1c[nH]c2c1cccc2)N	204.225	1.8226	11	DrugBank:DB00150|IUPHAR:717|KEGG:D00020|TTD:D05EJG	L-Tryptophan (DrugBank:DB00150)|L-tryptophan (IUPHAR:717)|Tryptophan (USP/INN) (KEGG:D00020)|L-Tryptophan (TTD:D05EJG)	Approved; Nutraceutical; Withdrawn (DrugBank:DB00150)	73-22-3 (DrugBank:DB00150)|73-22-3 (KEGG:D00020)	N06AX02 (DrugBank:DB00150)|N06AX02 (KEGG:D00020)	Tryptophan may be useful in increasing serotonin production, promoting healthy sleep, managing depression by enhancing mental and emotional well-being, managing pain tolerance, and managing weight. (DrugBank:DB00150)|Metabolite (IUPHAR:717)|Antidepressant, Supplement (tryptophan) (KEGG:D00020)|Depression (TTD:D05EJG)
D-03435	Fc1ccc(CCCn2ccnc2)cc1 (TTD:D0D0DR)	Fc1ccc(cc1)CCCn1cncc1	204.243	2.655	12	TTD:D0D0DR
D-03436	COCCn1c(=O)sn(c1=O)CC (IUPHAR:8034)|s1n(c(=O)n(CCOC)c1=O)CC (TTD:D0M5DR)	COCCn1c(=O)sn(c1=O)CC	204.247	-0.2622	7	IUPHAR:8034|TTD:D0M5DR	RGS4 inhibitor 13 (IUPHAR:8034)				Synthetic organic (IUPHAR:8034)
D-03437	s1c(c2cccnc2)ccc1/C=N/O (TTD:D0C7JC)	O/N=C/c1ccc(s1)c1cccnc1	204.248	2.6182	10	TTD:D0C7JC
D-03440	Oc1c2c(CCN(C)C)c[nH]c2ccc1 (TTD:D08ZWM)	CN(CCc1c[nH]c2c1c(O)ccc2)C	204.268	1.9776	12	TTD:D08ZWM
D-03441	CN(C)CCC1=CNC2=C1C=C(O)C=C2 (DrugBank:DB01445)|CN(CCc1c[nH]c2c1cc(O)cc2)C (IUPHAR:144)|Oc1cc2c(CCN(C)C)c[nH]c2cc1 (TTD:D0SP2J)	CN(CCc1c[nH]c2c1cc(O)cc2)C	204.268	1.9776	12	DrugBank:DB01445|IUPHAR:144|TTD:D0SP2J	Bufotenine (DrugBank:DB01445)|bufotenine (IUPHAR:144)|bufotenine (TTD:D0SP2J)	Experimental; Illicit (DrugBank:DB01445)	487-93-4 (DrugBank:DB01445)		Synthetic organic (IUPHAR:144)
D-03442	Oc1cc2[nH]cc(CCN(C)C)c2cc1 (TTD:D00APD)	CN(CCc1c[nH]c2c1ccc(c2)O)C	204.268	1.9776	12	TTD:D00APD
D-03443	Oc1c2c(n(CCN(C)C)cc2)ccc1 (TTD:D07LHD)	CN(CCn1ccc2c1cccc2O)C	204.268	1.9085	12	TTD:D07LHD
D-03444	Oc1c2c(CN(C)C)cn(c2ccc1)C (TTD:D0T8UR)	CN(Cc1cn(c2c1c(O)ccc2)C)C	204.268	1.9455	12	TTD:D0T8UR
D-03446	S(=O)(=O)(N)c1c(SC)ccnc1 (TTD:D0J7GU)	CSc1ccncc1S(=O)(=O)N	204.27	2.232	6	TTD:D0J7GU
D-03457	N1(CCN(CC1)C)C(c1ccccc1)C (TTD:D00XMP)	CC(c1ccccc1)N1CCN(CC1)C	204.311	1.8708	13	TTD:D00XMP
D-03458	N1(CCCC1)CCc1ncc(cc1)CC (TTD:D0M7QR)	CCc1ccc(nc1)CCN1CCCC1	204.311	2.2202	13	TTD:D0M7QR
D-03465	OC(=O)C(CCC(=O)O)CC(=O)NO (TTD:D0FU7Y)	ONC(=O)CC(C(=O)O)CCC(=O)O	205.165	-0.1616	7	TTD:D0FU7Y
D-03470	S(=O)(=O)(N)c1cc(F)c(NN)cc1 (TTD:D01YHK)	NNc1ccc(cc1F)S(=O)(=O)N	205.21	2.3131	6	TTD:D01YHK
D-03477	OC(=O)c1ccc2c(c1)nnn2C(C)C (IUPHAR:1597)|OC(=O)c1cc2nnn(C(C)C)c2cc1 (TTD:D0VE9G)	OC(=O)c1ccc2c(c1)nnn2C(C)C	205.213	1.7104	10	IUPHAR:1597|TTD:D0VE9G	IBC 293 (IUPHAR:1597)|IBC 293 (TTD:D0VE9G)				Synthetic organic (IUPHAR:1597)
D-03478	O1CCN(CC1)c1ncnc2nc[nH]c12 (TTD:D0S3TJ)	O1CCN(CC1)c1ncnc2c1[nH]cn2	205.217	0.2545	9	TTD:D0S3TJ
D-03491	n1cc(c2cc3c(cc2)cccc3)ccc1 (TTD:D08FAB)	c1ccc(cn1)c1ccc2c(c1)cccc2	205.255	3.9018	15	TTD:D08FAB
D-03493	CCN(CC)C1=CC(C)=NC2=NC=NN12 (DrugBank:DB09283)|c12n(c(cc(n1)C)N(CC)CC)ncn2 (KEGG:D01220)|N(c1n2ncnc2nc(c1)C)(CC)CC (TTD:D0U2CV)|N(c1n2ncnc2nc(c1)C)(CC)CC (TTD:D0X8TP)	CCN(c1cc(C)nc2n1ncn2)CC	205.26	1.2789	10	DrugBank:DB09283|KEGG:D01220|TTD:D0U2CV|TTD:D0X8TP	Trapidil (DrugBank:DB09283)|Trapidil (JP17/INN) (KEGG:D01220)	Experimental (DrugBank:DB09283)	15421-84-8 (DrugBank:DB09283)|15421-84-8 (KEGG:D01220)	C01DX11 (DrugBank:DB09283)|C01DX11 (KEGG:D01220)	Used in the treatment of chronic stable angina [A19770]. (DrugBank:DB09283)|Vasodilator, Phosphodiesterase inhibitor (KEGG:D01220)|Multiple myeloma (TTD:D0X8TP)
D-03495	NC(=N)NC(=N)NCCC1=CC=CC=C1 (DrugBank:DB00914)|c1(CCNC(=N)NC(=N)N)ccccc1 (KEGG:D08351)|c1(CCNC(=N)NC(=N)N)ccccc1.Cl (KEGG:D08352)	N=C(NC(=N)N)NCCc1ccccc1	205.26	1.9181	10	DrugBank:DB00914|KEGG:D08351|KEGG:D08352	Phenformin (DrugBank:DB00914)|Phenformin (BAN) (KEGG:D08351)|Phenformin hydrochloride (KEGG:D08352)	Approved; Investigational; Withdrawn (DrugBank:DB00914)	114-86-3 (DrugBank:DB00914)|114-86-3 (KEGG:D08351)|834-28-6 (KEGG:D08352)	A10BA01; A10BD01 (DrugBank:DB00914)|A10BA01 (KEGG:D08351)|A10BA01 (KEGG:D08352)	For the reatment of type II diabetes mellitus. (DrugBank:DB00914)|Antidiabetic, Hypoglycemic (KEGG:D08351)|Antidiabetic, Hypoglycemic (KEGG:D08352)
D-03497	S(Cc1oc(c2cccnc2)cc1)C (TTD:D0J1IE)	CSCc1ccc(o1)c1cccnc1	205.276	3.2046	11	TTD:D0J1IE
D-03499	SCC(C(=O)O)CCCN=C(N)N (IUPHAR:8656)|SCC(CCCN=C(N)N)C(=O)O (TTD:D0JD9E)	SCC(C(=O)O)CCCN=C(N)N	205.278	1.0712	7	IUPHAR:8656|TTD:D0JD9E	SQ-24,798 (IUPHAR:8656)				Synthetic organic (IUPHAR:8656)
D-03501	O=C(C(NC(C)(C)C)C)c1ccccc1 (TTD:D00WMS)	CC(C(=O)c1ccccc1)NC(C)(C)C	205.296	3.0368	13	TTD:D00WMS
D-03505	O(c1ccc(CCN2CCCC2)cc1)C (TTD:D0W2HJ)	COc1ccc(cc1)CCN1CCCC1	205.296	2.2714	13	TTD:D0W2HJ
D-03506	O(c1cc(CCN2CCCC2)ccc1)C (TTD:D07LCM)	COc1cccc(c1)CCN1CCCC1	205.296	2.2714	13	TTD:D07LCM
D-03507	O(c1c(CCN2CCCC2)cccc1)C (TTD:D0V9AJ)	COc1ccccc1CCN1CCCC1	205.296	2.2714	13	TTD:D0V9AJ
D-03508	Oc1c(CCN2[C@@H](CCC2)C)cccc1 (TTD:D0MX0Z)	C[C@@H]1CCCN1CCc1ccccc1O	205.296	2.3569	13	TTD:D0MX0Z
D-03509	Oc1c(CCN2[C@H](CCC2)C)cccc1 (TTD:D0T5KC)	C[C@H]1CCCN1CCc1ccccc1O	205.296	2.3569	13	TTD:D0T5KC
D-03510	O1C(CCC1CN)CCc1ccccc1 (TTD:D0L0AY)	NCC1CCC(O1)CCc1ccccc1	205.296	2.8258	13	TTD:D0L0AY
D-03511	O1C(CCC1Cc1ccccc1)CCN (TTD:D0J5AR)	NCCC1CCC(O1)Cc1ccccc1	205.296	2.8258	13	TTD:D0J5AR
D-03513	s1c(nc(c1)C#Cc1sccc1)C (TTD:D01ALS)	Cc1scc(n1)C#Cc1cccs1	205.299	2.9128	10	TTD:D01ALS
D-03514	s1c(nc(c1)C#Cc1ccsc1)C (TTD:D0L2KN)	Cc1scc(n1)C#Cc1cscc1	205.299	2.9128	10	TTD:D0L2KN
D-03522	Brc1c([nH]c(=O)[nH]c1=O)N (TTD:D0X5RA)	Nc1[nH]c(=O)[nH]c(=O)c1Br	205.997	-0.0109	4	TTD:D0X5RA
D-03529	O=C1N(C)c2c(C1=O)cc(cc2)[N+](=O)[O-] (IUPHAR:8635)|O=C1c2c(N(C1=O)C)ccc([N+](=O)[O-])c2 (TTD:D0Q9XX)	O=C1N(C)c2c(C1=O)cc(cc2)N(=O)=O	206.155	1.3421	9	IUPHAR:8635|TTD:D0Q9XX	casp 4 inhib (IUPHAR:8635)|casp 4 inhib (TTD:D0Q9XX)				Synthetic organic (IUPHAR:8635)
D-03530	Fc1[nH]c(=O)[nH]c(=O)c1c1ccccc1 (TTD:D0E9PL)	Fc1[nH]c(=O)[nH]c(=O)c1c1ccccc1	206.173	0.8693	10	TTD:D0E9PL
D-03536	NC(=N)C1=CC=C(CC(=O)C(O)=O)C=C1 (DrugBank:DB02018)	OC(=O)C(=O)Cc1ccc(cc1)C(=N)N	206.198	0.9669	10	DrugBank:DB02018	Amido Phenyl Pyruvic Acid (DrugBank:DB02018)	Experimental (DrugBank:DB02018)
D-03538	s1c2c(cc(c1=O)C(=O)O)cccc2 (TTD:D0D6UR)	OC(=O)c1cc2ccccc2sc1=O	206.218	1.9597	10	TTD:D0D6UR
D-03539	O=C1C(=C1C1=CC=CC=C1)C1=CC=CC=C1 (DrugBank:DB12173)|O=C1C(=C1c1ccccc1)c1ccccc1 (TTD:D02XXT)	O=C1C(=C1c1ccccc1)c1ccccc1	206.239	3.1801	15	DrugBank:DB12173|TTD:D02XXT	Diphencyprone (DrugBank:DB12173)	Investigational (DrugBank:DB12173)	886-38-4 (DrugBank:DB12173)		Alopecia (TTD:D02XXT)
D-03547	Fc1c2c(CCN(C)C)c[nH]c2ccc1 (TTD:D06ABJ)	CN(CCc1c[nH]c2c1c(F)ccc2)C	206.259	2.4111	12	TTD:D06ABJ
D-03548	SCCCC(CCC(=O)O)C(=O)O (TTD:D0Y7AN)	SCCCC(C(=O)O)CCC(=O)O	206.259	1.262	8	TTD:D0Y7AN
D-03550	CC1=NC(C)=C(S1)C1=NC(N)=NC=C1 (DrugBank:DB02091)|s1c(c(nc1C)C)c1nc(ncc1)N (TTD:D0U0GE)	Nc1nccc(n1)c1sc(nc1C)C	206.267	2.3803	9	DrugBank:DB02091|TTD:D0U0GE	4-(2,4-Dimethyl-Thiazol-5-Yl)-Pyrimidin-2-Ylamine (DrugBank:DB02091)	Experimental (DrugBank:DB02091)
D-03552	CC(C)CC1=CC=C(C=C1)C(C)C(O)=O (DrugBank:DB01050)|CC(Cc1ccc(cc1)C(C(=O)O)C)C (IUPHAR:2713)|OC(=O)C(c1ccc(cc1)CC(C)C)C (KEGG:D00126)|OC(=O)C(c1ccc(cc1)CC(C)C)C.[C@H](CCCCN)(C(=O)O)N (KEGG:D06606)|OC(=O)C(c1ccc(cc1)CC(C)C)C.NC(=N)NCCC[C@@H](C(=O)O)N (KEGG:D08058)|OC(=O)C(c1ccc(CC(C)C)cc1)C (TTD:D03SHR)|OC(=O)C(c1ccc(CC(C)C)cc1)C (TTD:D0R1QE)	CC(Cc1ccc(cc1)C(C(=O)O)C)C	206.281	3.0732	13	DrugBank:DB01050|IUPHAR:2713|KEGG:D00126|KEGG:D06606|KEGG:D08058|TTD:D03SHR|TTD:D0R1QE	Ibuprofen (DrugBank:DB01050)|ibuprofen (IUPHAR:2713)|Ibuprofen (JP17/USP/INN) (KEGG:D00126)|Ibuprofen lysine (USAN) (KEGG:D06606)|Ibuprofen arginine salt (KEGG:D08058)|Ibuprofen (TTD:D0R1QE)	Approved (DrugBank:DB01050)|Approved (IUPHAR:2713)	15687-27-1 (DrugBank:DB01050)|15687-27-1 (KEGG:D00126)|57469-77-9 (KEGG:D06606)	C01EB16; G02CC01; M01AE01; M01AE51; M02AA13; N02AJ08; N02AJ19; R02AX02 (DrugBank:DB01050)|C01EB16; G02CC01; M01AE01; M02AA13; R02AX02 (KEGG:D00126)|C01EB16; G02CC01; M01AE01; M02AA13; R02AX02 (KEGG:D06606)|C01EB16; G02CC01; M01AE01; M02AA13; R02AX02 (KEGG:D08058)	Ibuprofen is the most commonly used and prescribed NSAID. It is very common over the counter medication widely used as an analgesic, anti-inflammatory and antipyretic.[A39096] The use of ibuprofen and its enantiomer [DB09213] in a racemic mix is common for the management of mild to moderate pain related to dysmenorrhea, headache, migraine, postoperative dental pain, spondylitis, osteoarthritis, r…
D-03553	CC(C)CC1=CC=C(C=C1)[C@H](C)C(O)=O (DrugBank:DB09213)|OC(=O)[C@H](c1ccc(cc1)CC(C)C)C (KEGG:D03715)|OC(=O)[C@H](c1ccc(cc1)CC(C)C)C.[C@H](CCCCN)(C(=O)O)N.O (KEGG:D03718)	CC(Cc1ccc(cc1)[C@@H](C(=O)O)C)C	206.281	3.0732	13	DrugBank:DB09213|KEGG:D03715|KEGG:D03718	Dexibuprofen (DrugBank:DB09213)|Dexibuprofen (USAN/INN) (KEGG:D03715)|Dexibuprofen lysine (USAN) (KEGG:D03718)	Approved; Investigational (DrugBank:DB09213)	51146-56-6 (DrugBank:DB09213)|51146-56-6 (KEGG:D03715)|141505-32-0 (KEGG:D03718)	M01AE14 (DrugBank:DB09213)|M01AE14 (KEGG:D03715)|M01AE14 (KEGG:D03718)	For more information, refer to [ibuprofen]. (DrugBank:DB09213)|Analgesic, Anti-inflammatory, COX inhibitor (KEGG:D03715)|Analgesic, Anti-inflammatory, COX inhibitor (KEGG:D03718)
D-03558	c1(/C=C/C=C/c2ccccc2)ccccc1 (TTD:D0J0MX)	C(=C\c1ccccc1)/C=C/c1ccccc1	206.282	4.4132	16	TTD:D0J0MX
D-03562	O=C1CCCN1CC#CCN1CCCC1 (IUPHAR:302)|O=C1N(CCC1)CC#CCN1CCCC1 (TTD:D08FOC)|O=C1N(CCC1)CC#CCN1CCCC1 (TTD:D0L1XR)	O=C1CCCN1CC#CCN1CCCC1	206.284	0.5838	12	IUPHAR:302|TTD:D08FOC|TTD:D0L1XR	oxotremorine (IUPHAR:302)				Synthetic organic (IUPHAR:302)
D-03568	Oc1ccc(C(CC(C)(C)C)(C)C)cc1.O1CC1.O=C (TTD:D00ARN)	CC(c1ccc(cc1)O)(CC(C)(C)C)C	206.324	4.106	14	TTD:D00ARN	Tyloxapol (TTD:D00ARN)				Cystic fibrosis (TTD:D00ARN)
D-03569	Oc1c(C(C)(C)C)cccc1C(C)(C)C (TTD:D06MZK)	CC(c1cccc(c1O)C(C)(C)C)(C)C	206.324	3.9872	14	TTD:D06MZK
D-03570	S1SCCC1CCCCC(=O)O (KEGG:D00086)|S1SCCC1CCCCC(=O)O (TTD:D0P6PQ)	OC(=O)CCCCC1SSCC1	206.326	2.7851	8	KEGG:D00086|TTD:D0P6PQ	Thioctic acid (JAN) (KEGG:D00086)		62-46-4 (KEGG:D00086)	A16AX01 (KEGG:D00086)	Supplement (thioctic acid) (KEGG:D00086)
D-03571	OC(=O)CCCC[C@@H]1CCSS1 (DrugBank:DB00166)|NC(CO)(CO)CO.OC(=O)CCCC[C@@H]1CCSS1 (DrugBank:DB06253)|OC(=O)CCCC[C@H]1SSCC1 (IUPHAR:4822)|S1SCC[C@H]1CCCCC(=O)O (TTD:D02EVF)|S1SCC[C@H]1CCCCC(=O)O (TTD:D05YSU)	OC(=O)CCCC[C@H]1SSCC1	206.326	2.7851	8	DrugBank:DB00166|DrugBank:DB06253|IUPHAR:4822|TTD:D02EVF|TTD:D05YSU	Lipoic Acid (DrugBank:DB00166)|Thioctic acid tromethamine (DrugBank:DB06253)|lipoic acid (IUPHAR:4822)|Losartan/thioctic acid (TTD:D02EVF)|lipoic acid (TTD:D05YSU)	Approved; Investigational; Nutraceutical (DrugBank:DB00166)|Investigational (DrugBank:DB06253)	1200-22-2 (DrugBank:DB00166)|137314-40-0 (DrugBank:DB06253)	A16AX01 (DrugBank:DB00166)	For nutritional supplementation, also for treating dietary shortage or imbalance. (DrugBank:DB00166)|Investigated for use/treatment in diabetes mellitus type 2, neuropathy (diabetic), and vascular diseases. (DrugBank:DB06253)|Metabolite (IUPHAR:4822)|Diabetic nephropathy (TTD:D02EVF)
D-03575	Clc1cc(S(=O)(=O)N)ccc1N (TTD:D0YU8J)	Nc1ccc(cc1Cl)S(=O)(=O)N	206.65	2.9319	6	TTD:D0YU8J	4-Amino-3-chloro-benzenesulfonamide (TTD:D0YU8J)
D-03578	Clc1cc2c(n3c(CNCC3)c2)cc1 (TTD:D04UCV)	Clc1ccc2c(c1)cc1n2CCNC1	206.671	2.7267	11	TTD:D04UCV
D-03579	Clc1cc2n3c(CNCC3)cc2cc1 (TTD:D01WNO)	Clc1ccc2c(c1)n1CCNCc1c2	206.671	2.7267	11	TTD:D01WNO
D-03580	Clc1c2n3c(CNCC3)cc2ccc1 (TTD:D0K6VR)	Clc1cccc2c1n1CCNCc1c2	206.671	2.7267	11	TTD:D0K6VR
D-03581	Clc1c(O)c(cc(Cl)c1)C(=O)O (TTD:D06SPO)	Clc1cc(Cl)c(c(c1)C(=O)O)O	207.011	2.3972	7	TTD:D06SPO
D-03587	O=c1n(c(=O)nc2n(nc(nc12)C)C)C (TTD:D0P0CM)	Cc1nn(C)c2c(n1)c(=O)n(c(=O)n2)C	207.189	-1.2694	8	TTD:D0P0CM
D-03590	S(=O)(=O)(N)C(F)(F)c1ccccc1 (TTD:D0UN0E)	FC(S(=O)(=O)N)(c1ccccc1)F	207.198	2.8055	7	TTD:D0UN0E
D-03591	OCCN1C[C@H](O)[C@@H](O)[C@H](O)[C@H]1CO (DrugBank:DB00491)|OCCN1C[C@H](O)[C@H]([C@@H]([C@H]1CO)O)O (IUPHAR:4842)|N1([C@@H]([C@H]([C@@H]([C@H](C1)O)O)O)CO)CCO (KEGG:D00625)|O[C@@H]1[C@H](N(C[C@H](O)[C@H]1O)CCO)CO (TTD:D0D0ZD)	OCCN1C[C@H](O)[C@H]([C@@H]([C@H]1CO)O)O	207.224	-3.3242	8	DrugBank:DB00491|IUPHAR:4842|KEGG:D00625|TTD:D0D0ZD	Miglitol (DrugBank:DB00491)|miglitol (IUPHAR:4842)|Miglitol (JP17/USAN/INN) (KEGG:D00625)|Miglitol (TTD:D0D0ZD)	Approved (DrugBank:DB00491)|Approved (IUPHAR:4842)	72432-03-2 (DrugBank:DB00491)|72432-03-2 (KEGG:D00625)	A10BF02 (DrugBank:DB00491)|A10BF02 (KEGG:D00625)	For use as an adjunct to diet to improve glycemic control in patients with non-insulin-dependent diabetes mellitus (NIDDM) whose hyperglycemia cannot be managed with diet alone. (DrugBank:DB00491)|Synthetic organic (IUPHAR:4842)|Antidiabetic, alpha-Glucosidase inhibitor (KEGG:D00625)|Diabetes (TTD:D0D0ZD)
D-03594	CC1=CC(=CC=C1)N1CC(CO)OC1=O (DrugBank:DB09245)|c1cc(cc(c1)N1CC(OC1=O)CO)C (KEGG:D02559)|O1C(CN(c2cc(ccc2)C)C1=O)CO (TTD:D0V3NT)	OCC1OC(=O)N(C1)c1cccc(c1)C	207.226	1.3775	11	DrugBank:DB09245|KEGG:D02559|TTD:D0V3NT	Toloxatone (DrugBank:DB09245)|Toloxatone (INN) (KEGG:D02559)	Experimental (DrugBank:DB09245)	29218-27-7 (DrugBank:DB09245)|29218-27-7 (KEGG:D02559)	N06AG03 (DrugBank:DB09245)|N06AG03 (KEGG:D02559)	For the treatment of major depressive disorder. (DrugBank:DB09245)|Antidepressant, Monoamine oxidase A (MAO-A) inhibitor (KEGG:D02559)
D-03598	CC/C(=N\O)/C(=C/c1ccc(cc1)F)/C (IUPHAR:6280)|Fc1ccc(/C=C(/C(=N/O)/CC)\C)cc1 (TTD:D0U9UF)	CC/C(=N\O)/C(=C/c1ccc(cc1)F)/C	207.244	3.4692	12	IUPHAR:6280|TTD:D0U9UF	A-967079 (IUPHAR:6280)|A-967079 (TTD:D0U9UF)				Synthetic organic (IUPHAR:6280)|Pain (TTD:D0U9UF)
D-03599	N#C/C=C/S(=O)(=O)c1ccc(cc1)C (IUPHAR:5934)|S(=O)(=O)(c1ccc(cc1)C)/C=C/C#N (TTD:D0L2XO)	N#C/C=C/S(=O)(=O)c1ccc(cc1)C	207.249	2.88678	10	IUPHAR:5934|TTD:D0L2XO	BAY 11-7082 (IUPHAR:5934)				Synthetic organic (IUPHAR:5934)|Multiple myeloma (TTD:D0L2XO)
D-03605	O(c1cc(CCCNC(=O)C)ccc1)C (TTD:D0U8OS)	COc1cccc(c1)CCCNC(=O)C	207.269	2.1548	12	TTD:D0U8OS
D-03606	CC1=CC(=O)N(O)C(=C1)C1CCCCC1 (DrugBank:DB01188)|n1(c(cc(cc1=O)C)C1CCCCC1)O.C(CO)N (KEGG:D01364)|n1(c(cc(cc1=O)C)C1CCCCC1)O (KEGG:D03488)|On1c(C2CCCCC2)cc(cc1=O)C (TTD:D07GRH)	Cc1cc(C2CCCCC2)n(c(=O)c1)O	207.269	2.4417	12	DrugBank:DB01188|KEGG:D01364|KEGG:D03488|TTD:D07GRH	Ciclopirox (DrugBank:DB01188)|Ciclopirox olamine (JAN/USP) (KEGG:D01364)|Ciclopirox (USP/INN) (KEGG:D03488)|Ciclopirox (TTD:D07GRH)	Approved; Investigational (DrugBank:DB01188)	29342-05-0 (DrugBank:DB01188)|41621-49-2 (KEGG:D01364)|29342-05-0 (KEGG:D03488)	D01AE14; G01AX12 (DrugBank:DB01188)|D01AE14; G01AX12 (KEGG:D01364)|D01AE14; G01AX12 (KEGG:D03488)	Used as a topical treatment in immunocompetent patients with mild to moderate onychomycosis of fingernails and toenails without lunula involvement, due to <i>Trichophyton rubrum</i>. (DrugBank:DB01188)|Antifungal (KEGG:D01364)|Antifungal (KEGG:D03488)|Fungal infections (TTD:D07GRH)
D-03607	O1C(CCC1c1ccc(OC)cc1)CN (TTD:D0IB6Y)	NCC1CCC(O1)c1ccc(cc1)OC	207.269	2.5743	12	TTD:D0IB6Y
D-03608	n1cc(/C=C/2\CCc3c2cccc3)ccc1 (TTD:D01SUE)	c1ccc(cn1)/C=C/1\CCc2c1cccc2	207.27	3.5684	15	TTD:D01SUE
D-03609	n1cc(/C=C\2/CCc3c2cccc3)ccc1 (TTD:D07PYC)	c1ccc(cn1)/C=C\1/CCc2c1cccc2	207.27	3.5684	15	TTD:D07PYC
D-03610	n1cc(C2=Cc3c(CC2)cccc3)ccc1 (TTD:D0I5NW)	c1ccc(cn1)C1=Cc2c(CC1)cccc2	207.27	3.5684	15	TTD:D0I5NW
D-03611	n1ccc(/C=C/2\CCc3c2cccc3)cc1 (TTD:D05YNW)	n1ccc(cc1)/C=C/1\CCc2c1cccc2	207.27	3.5684	15	TTD:D05YNW
D-03612	n1ccc(/C=C\2/CCc3c2cccc3)cc1 (TTD:D02CSU)	n1ccc(cc1)/C=C\1/CCc2c1cccc2	207.27	3.5684	15	TTD:D02CSU
D-03615	S(CCC)c1cc(OC)c(cc1)C#N (TTD:D08RCS)	CCCSc1ccc(c(c1)OC)C#N	207.292	3.06898	11	TTD:D08RCS
D-03616	S(C(C)C)c1cc(OC)c(cc1)C#N (TTD:D00BLY)	COc1cc(ccc1C#N)SC(C)C	207.292	3.06738	11	TTD:D00BLY
D-03622	Clc1c([C@@H]2[C@@H](N)CC=CC2)cccc1 (TTD:D05UUA)	N[C@H]1CC=CC[C@@H]1c1ccccc1Cl	207.699	3.8012	12	TTD:D05UUA
D-03624	O[C@]([C@H](O)C(=O)O)(CC(=O)O)C(=O)O (TTD:D0R8UX)	OC(=O)C[C@]([C@@H](C(=O)O)O)(C(=O)O)O	208.123	-2.2777	6	TTD:D0R8UX
D-03632	[H][C@](CC(O)=O)(CC1=CC=CC=C1)C(O)=O (DrugBank:DB07506)	OC(=O)[C@H](Cc1ccccc1)CC(=O)O	208.211	1.4046	11	DrugBank:DB07506	L-BENZYLSUCCINIC ACID (DrugBank:DB07506)	Experimental (DrugBank:DB07506)
D-03633	O=C1c2c(c3c(C1=O)cccc3)cccc2 (TTD:D0Q2YJ)	O=C1C(=O)c2ccccc2c2c1cccc2	208.212	2.7326	14	TTD:D0Q2YJ
D-03634	O=C1c2c(C(=O)c3c1cccc3)cccc2 (TTD:D0L5LN)	O=C1c2ccccc2C(=O)c2c1cccc2	208.212	2.462	14	TTD:D0L5LN
D-03638	OC(=O)[C@@H](CC(=O)c1ccccc1N)N (IUPHAR:5799)|O=C(C[C@@H](N)C(=O)O)c1c(N)cccc1 (TTD:D09DXN)	OC(=O)[C@@H](CC(=O)c1ccccc1N)N	208.214	1.535	10	IUPHAR:5799|TTD:D09DXN	D-kynurenine (IUPHAR:5799)				Synthetic organic (IUPHAR:5799)
D-03639	N[C@@H](CC(=O)C1=CC=CC=C1N)C(O)=O (DrugBank:DB02070)	OC(=O)[C@H](CC(=O)c1ccccc1N)N	208.214	1.535	10	DrugBank:DB02070	L-2-Amino-4-[2-Aminophenyl]-4-Oxobutanoic Acid (DrugBank:DB02070)	Experimental (DrugBank:DB02070)
D-03643	O=c1n(CCCC)c(=O)[nH]c2nc[nH]c12 (TTD:D0A2WH)	CCCCn1c(=O)[nH]c2c(c1=O)[nH]cn2	208.217	0.213	9	TTD:D0A2WH
D-03644	O=c1n(CCC)c2nc[nH]c2c(=O)n1C (TTD:D00TQR)	CCCn1c(=O)n(C)c(=O)c2c1nc[nH]2	208.217	-0.1667	9	TTD:D00TQR
D-03645	O=c1n(c2nc[nH]c2c(=O)n1CC)CC (TTD:D02RMR)	CCn1c(=O)c2[nH]cnc2n(c1=O)CC	208.217	-0.0739	9	TTD:D02RMR
D-03646	O=c1n(C(C)C)c2nc[nH]c2c(=O)n1C (TTD:D0M7AX)	Cn1c(=O)n(C(C)C)c2c(c1=O)[nH]cn2	208.217	0.0042	9	TTD:D0M7AX
D-03650	S(=O)(=O)(N)c1c2ncccc2ccc1 (TTD:D0F7SO)	NS(=O)(=O)c1cccc2c1nccc2	208.237	2.6633	9	TTD:D0F7SO
D-03653	O=C(c1ccccc1)/C=C/c1ccccc1 (TTD:D06ERH)	O=C(c1ccccc1)/C=C/c1ccccc1	208.255	3.5827	15	TTD:D06ERH
D-03654	CC[C@H]1[C@@H](CC2=CN=CN2C)COC1=O (DrugBank:DB01085)|CC[C@@H]1C(=O)OC[C@@H]1Cc1cncn1C (IUPHAR:305)|[C@H]1([C@@H](C(=O)OC1)CC)Cc1n(cnc1)C (KEGG:D00525)|[C@H]1([C@@H](C(=O)OC1)CC)Cc1n(cnc1)C.Cl (KEGG:D02200)|[C@H]1([C@@H](C(=O)OC1)CC)Cc1n(cnc1)C.[N+](=O)([O-])O (KEGG:D05478)|[C@H]1([C@@H](C(=O)OC1)CC)Cc1n(cnc1)C.B(O)(O)O (KEGG:D08376)|O1C[C@@H]([C@H](CC)C1=O)Cc1n(cnc1)C (TTD:D06HLY)	CC[C@@H]1C(=O)OC[C@@H]1Cc1cncn1C	208.257	1.1618	11	DrugBank:DB01085|IUPHAR:305|KEGG:D00525|KEGG:D02200|KEGG:D05478|KEGG:D08376|TTD:D06HLY	Pilocarpine (DrugBank:DB01085)|pilocarpine (IUPHAR:305)|Pilocarpine (JAN/USP) (KEGG:D00525)|Pilocarpine hydrochloride (JP17/USP) (KEGG:D02200)|Pilocarpine nitrate (USP) (KEGG:D05478)|Pilocarpine borate (KEGG:D08376)|Pilocarpine (TTD:D06HLY)	Approved; Investigational (DrugBank:DB01085)|Approved (IUPHAR:305)	92-13-7 (DrugBank:DB01085)|92-13-7 (KEGG:D00525)|54-71-7 (KEGG:D02200)|148-72-1 (KEGG:D05478)|16509-56-1 (KEGG:D08376)	N07AX01; S01EB01; S01EB51 (DrugBank:DB01085)|N07AX01; S01EB01 (KEGG:D00525)|N07AX01; S01EB01 (KEGG:D02200)|N07AX01; S01EB01 (KEGG:D05478)|N07AX01; S01EB01 (KEGG:D08376)	For the treatment of radiation-induced dry mouth (xerostomia) and symptoms of dry mouth in patients with Sj&ouml;grens syndrome. (DrugBank:DB01085)|Synthetic organic (IUPHAR:305)|Antiglaucoma, Muscarinic acetylcholine receptor agonist (KEGG:D00525)|Antiglaucoma, Miotic, Salivation accelaletor, Muscarinic acetylcholine receptor agonist (KEGG:D02200)|Miotic, Muscarinic acetylcholine receptor agonis…
D-03657	[nH]1c(c(c2c1cccc2)c1ccncc1)C (TTD:D0D2ST)	Cc1[nH]c2c(c1c1ccncc1)cccc2	208.258	3.5383	14	TTD:D0D2ST
D-03659	CC1=CC=NC2=C3N=CC=C(C)C3=CC=C12 (DrugBank:DB02586)	Cc1ccnc2c1ccc1c2nccc1C	208.258	3.3998	14	DrugBank:DB02586	4,7-Dimethyl-[1,10]Phenanthroline (DrugBank:DB02586)	Experimental (DrugBank:DB02586)	3248-05-3 (DrugBank:DB02586)
D-03661	n1(Cc2ccccc2)c2c(nccc2)cc1 (TTD:D0N5XG)	c1ccc(cc1)Cn1ccc2c1cccn2	208.258	3.0846	14	TTD:D0N5XG
D-03662	S(=O)(=O)(Nc1sc(nn1)CC)N (TTD:D0S4NO)	CCc1nnc(s1)NS(=O)(=O)N	208.262	1.57	4	TTD:D0S4NO
D-03663	N1(CCN(CC1)C)c1nc(nc(N)c1)N (TTD:D0UK0F)	CN1CCN(CC1)c1cc(N)nc(n1)N	208.264	0.5581	9	TTD:D0UK0F
D-03665	CCCCCCCOc1ccc(cc1)O (IUPHAR:5422)|O(CCCCCCC)c1ccc(O)cc1 (TTD:D03ZWK)	CCCCCCCOc1ccc(cc1)O	208.297	3.7414	13	IUPHAR:5422|TTD:D03ZWK	AC45594 (IUPHAR:5422)|AC45594 (TTD:D03ZWK)				Synthetic organic (IUPHAR:5422)
D-03667	SCCC(CCCCC(=O)O)S (IUPHAR:6738)|SC(CCCCC(=O)O)CCS (TTD:D0Z3PG)	SCCC(CCCCC(=O)O)S	208.341	2.2497	8	IUPHAR:6738|TTD:D0Z3PG	dihydrolipoic acid (IUPHAR:6738)				Synthetic organic (IUPHAR:6738)
D-03671	CN(C)C(=S)SC(=S)N(C)C (DrugBank:DB14178)	CN(C(=S)SC(=S)N(C)C)C	208.368	1.4126	6	DrugBank:DB14178	Tetramethylthiuram monosulfide (DrugBank:DB14178)	Approved; Experimental (DrugBank:DB14178)	97-74-5 (DrugBank:DB14178)
D-03672	Clc1cc2c(n(CC(N)C)cc2)cc1 (TTD:D0Q3OK)	CC(Cn1ccc2c1ccc(c2)Cl)N	208.687	3.3422	11	TTD:D0Q3OK
D-03673	Clc1ccc(cn1)C1CC2NC1CC2 (IUPHAR:3976)|Clc1ccc(cn1)C1CC2NC1CC2 (IUPHAR:3977)|Clc1ncc(C2C3NC(C2)CC3)cc1 (TTD:D02CNL)|Clc1ncc(C2C3NC(C2)CC3)cc1 (TTD:D0R4RN)	Clc1ccc(cn1)C1CC2NC1CC2	208.687	2.6717	11	IUPHAR:3976|IUPHAR:3977|TTD:D02CNL|TTD:D0R4RN	[<sup>125</sup>I]epibatidine (IUPHAR:3976)|[<sup>3</sup>H]epibatidine (IUPHAR:3977)	Labelled; Radioactive (IUPHAR:3976)|Labelled; Radioactive (IUPHAR:3977)			Natural product (IUPHAR:3976)|Natural product (IUPHAR:3977)
D-03674	Clc1ccc(cn1)[C@@H]1C[C@@H]2N[C@H]1CC2 (IUPHAR:5348)|Clc1ncc([C@H]2[C@H]3N[C@@H](C2)CC3)cc1 (TTD:D0O5EZ)	Clc1ccc(cn1)[C@@H]1C[C@@H]2N[C@H]1CC2	208.687	2.6717	11	IUPHAR:5348|TTD:D0O5EZ	epibatidine (IUPHAR:5348)				Natural product (IUPHAR:5348)
D-03675	[H][C@@]12CC[C@@]([H])(N1)[C@]([H])(C2)C1=CC=C(Cl)N=C1 (DrugBank:DB07720)	Clc1ccc(cn1)[C@H]1C[C@H]2N[C@@H]1CC2	208.687	2.6717	11	DrugBank:DB07720	Epibatidine (DrugBank:DB07720)	Experimental (DrugBank:DB07720)	140111-52-0 (DrugBank:DB07720)
D-03682	[H][C@@](CC1=CC=CC=C1)(C[N+]([O-])=O)C(O)=O (DrugBank:DB06924)	OC(=O)[C@@H](CN(=O)=O)Cc1ccccc1	209.199	1.7298	10	DrugBank:DB06924	(2R)-2-benzyl-3-nitropropanoic acid (DrugBank:DB06924)	Experimental (DrugBank:DB06924)
D-03684	C[C@@](N)(C(O)=O)C1=CC=C(C=C1)C(O)=O (DrugBank:DB04256)|OC(=O)c1ccc(cc1)[C@@](C(=O)O)(N)C (IUPHAR:1373)|OC(=O)[C@@](N)(c1ccc(cc1)C(=O)O)C (TTD:D06ALU)|OC(=O)[C@@](N)(c1ccc(cc1)C(=O)O)C (TTD:D0J8OW)	OC(=O)c1ccc(cc1)[C@@](C(=O)O)(N)C	209.199	1.3436	10	DrugBank:DB04256|IUPHAR:1373|TTD:D06ALU|TTD:D0J8OW	4-(1-Amino-1-Carboxy-Ethyl)-Benzoic Acid (DrugBank:DB04256)|(+)-MCPG (IUPHAR:1373)|(+)-MCPG (TTD:D0J8OW)	Experimental (DrugBank:DB04256)			Synthetic organic (IUPHAR:1373)
D-03688	O[C@@H](Cn1c2ncnc(N)c2nc1)CO (TTD:D02XPR)	OC[C@H](Cn1cnc2c1ncnc2N)O	209.205	-0.6571	8	TTD:D02XPR
D-03695	c1(ccccc1OC(C)C)OC(=O)NC (KEGG:D08442)	CNC(=O)Oc1ccccc1OC(C)C	209.242	2.5829	11	KEGG:D08442	Propoxur (BAN) (KEGG:D08442)		114-26-1 (KEGG:D08442)		Insecticide, Antiparasitic, Acetylcholinesterase inhibitor (KEGG:D08442)
D-03698	O=C1CCc2c1ccc(c2)c1cccnc1 (TTD:D0G9WP)	O=C1CCc2c1ccc(c2)c1cccnc1	209.243	2.8775	14	TTD:D0G9WP
D-03699	CC1=CC(=C(NCCCN)C=C1)[N+]([O-])=O (DrugBank:DB05492)	NCCCNc1ccc(cc1N(=O)=O)C	209.245	2.9604	10	DrugBank:DB05492	Epicept NP-1 (DrugBank:DB05492)	Investigational (DrugBank:DB05492)			Investigated for use/treatment in neuropathy (diabetic) and pain (acute or chronic). (DrugBank:DB05492)
D-03701	[nH]1c2c(nc1c1ncccc1)ccc(c2)C (TTD:D0C0UB)	Cc1ccc2c(c1)[nH]c(n2)c1ccccn1	209.247	2.9333	13	TTD:D0C0UB
D-03702	n1c(C)cnnc1C#Cc1cc(ccc1)C (TTD:D03QRG)	Cc1cccc(c1)C#Cc1nncc(n1)C	209.247	1.8882	13	TTD:D03QRG
D-03703	n1(c2c(nc1)cccc2)c1ccc(N)cc1 (TTD:D01MUN)	Nc1ccc(cc1)n1cnc2c1cccc2	209.247	3.1889	13	TTD:D01MUN
D-03704	[nH]1c2c(c(c1)c1ccncc1)ccc(N)c2 (TTD:D0K4EM)	Nc1ccc2c(c1)[nH]cc2c1ccncc1	209.247	3.3933	13	TTD:D0K4EM
D-03705	NC1=CC2=NC3=C(C=CC(N)=C3)C=C2C=C1 (DrugBank:DB01123)|n1c2c(cc3c1cc(N)cc3)ccc(N)c2 (TTD:D08GSF)	Nc1ccc2c(c1)nc1c(c2)ccc(c1)N	209.247	3.7148	13	DrugBank:DB01123|TTD:D08GSF	Proflavine (DrugBank:DB01123)|Proflavine (TTD:D08GSF)	Approved (DrugBank:DB01123)	92-62-6 (DrugBank:DB01123)		Topical antiseptic used mainly in wound dressings. (DrugBank:DB01123)|Sepsis (TTD:D08GSF)
D-03706	[nH]1c2c(c(c1)c1ccncc1)cccc2N (TTD:D0AL2E)	Nc1cccc2c1[nH]cc2c1ccncc1	209.247	3.3933	13	TTD:D0AL2E
D-03707	NC1=NNC2=CC=C(C=C12)C1=CC=CC=C1 (DrugBank:DB07161)|[nH]1nc(N)c2c1ccc(c2)c1ccccc1 (TTD:D0I3EY)	Nc1n[nH]c2c1cc(cc2)c1ccccc1	209.247	3.3933	13	DrugBank:DB07161|TTD:D0I3EY	5-phenyl-1H-indazol-3-amine (DrugBank:DB07161)	Experimental (DrugBank:DB07161)
D-03709	n1(Nc2ccncc2)c2c(cc1)cccc2 (TTD:D0D1RU)	n1ccc(cc1)Nn1ccc2c1cccc2	209.247	2.9845	13	TTD:D0D1RU
D-03710	n1(Cc2cc3c(cc2)ccnc3)ccnc1 (TTD:D0PU5V)	n1ccc2c(c1)cc(cc2)Cn1cncc1	209.247	2.4796	13	TTD:D0PU5V
D-03720	COC1=CC(CC(C)N)=C(OC)C=C1C (DrugBank:DB01528)|COc1cc(C)c(cc1CC(N)C)OC (IUPHAR:164)|O(c1c(CC(N)C)cc(OC)c(c1)C)C (TTD:D08XYR)	COc1cc(C)c(cc1CC(N)C)OC	209.285	2.6022	12	DrugBank:DB01528|IUPHAR:164|TTD:D08XYR	4-Methyl-2,5-dimethoxyamphetamine (DrugBank:DB01528)|DOM (IUPHAR:164)	Experimental; Illicit (DrugBank:DB01528)	15588-95-1 (DrugBank:DB01528)		Synthetic organic (IUPHAR:164)
D-03724	[nH]1c2c(c3c1cccc3)ccc(C(C)C)c2 (TTD:D08FXD)	CC(c1ccc2c(c1)[nH]c1c2cccc1)C	209.286	4.4445	15	TTD:D08FXD
D-03727	NCC1c2c(Cc3c1cccc3)cccc2 (TTD:D01CXD)	NCC1c2ccccc2Cc2c1cccc2	209.286	3.3817	15	TTD:D01CXD	9-(Aminomethyl)-9,10-dihydroanthracene (TTD:D01CXD)
D-03728	n1cc(c2cc3CCCCc3cc2)ccc1 (TTD:D0VL3R)	c1ccc(cn1)c1ccc2c(c1)CCCC2	209.286	3.6274	15	TTD:D0VL3R
D-03729	O=C(N1[C@@H](CCC1)C#N)[C@@H](N)C(C)(C)C (TTD:D05XWX)	N#C[C@@H]1CCCN1C(=O)[C@H](C(C)(C)C)N	209.288	1.51258	11	TTD:D05XWX
D-03730	S(=O)(=O)(OCCCCCCCC)N (TTD:D05TLB)	CCCCCCCCOS(=O)(=O)N	209.306	3.3481	8	TTD:D05TLB
D-03733	C=CCN1CCc2c(CC1)nc(s2)N (IUPHAR:5442)|Cl.c12c(nc(s1)N)CCN(CC2)CC=C.Cl (KEGG:D01505)|c12c(nc(s1)N)CCN(CC2)CC=C (KEGG:D08558)|s1c2CCN(CCc2nc1N)CC=C (TTD:D0Y7XC)	C=CCN1CCc2c(CC1)nc(s2)N	209.311	1.831	10	IUPHAR:5442|KEGG:D01505|KEGG:D08558|TTD:D0Y7XC	talipexole (IUPHAR:5442)|Talipexole hydrochloride (JAN) (KEGG:D01505)|Talipexole (INN) (KEGG:D08558)		36085-73-1 (KEGG:D01505)|101626-70-4 (KEGG:D08558)		Synthetic organic (IUPHAR:5442)|Antiparkinsonian, Dopamine D2 receptor agonist (KEGG:D01505)|Antiparkinsonian, Dopamine D2 receptor agonist (KEGG:D08558)
D-03735	S(c1ccc(C[C@@H](N)C)cc1)CCC (TTD:D08SSS)	CCCSc1ccc(cc1)C[C@@H](N)C	209.351	3.7787	12	TTD:D08SSS
D-03742	O/N=C(/C(=C/c1ccc(cc1)Cl)/C)\C (IUPHAR:4134)|Clc1ccc(/C=C(/C(=N/O)/C)\C)cc1 (TTD:D0A7ZS)|Clc1ccc(/C=C(/C(=N/O)/C)\C)cc1 (TTD:D0B0EL)	O/N=C(/C(=C/c1ccc(cc1)Cl)/C)\C	209.672	3.5934	11	IUPHAR:4134|TTD:D0A7ZS|TTD:D0B0EL	AP18 (IUPHAR:4134)|AP18 (TTD:D0B0EL)				Synthetic organic (IUPHAR:4134)
D-03754	O=C1c2c(nccc2)c2ncccc2C1=O (TTD:D0JH7C)	O=C1C(=O)c2cccnc2c2c1cccn2	210.188	1.5226	12	TTD:D0JH7C
D-03755	c12C(=O)C(=O)c3c(c1cccn2)cccn3 (KEGG:D07359)	O=C1c2ncccc2c2c(C1=O)nccc2	210.188	1.5226	12	KEGG:D07359	Phanquinone (INN) (KEGG:D07359)		84-12-8 (KEGG:D07359)	P01AX04 (KEGG:D07359)	Antiprotozoal (KEGG:D07359)
D-03756	Fc1cc2n(C[C@@H](N)C)ccc2cc1F (TTD:D0Q9FU)	C[C@@H](Cn1ccc2c1cc(F)c(c2)F)N	210.223	2.967	11	TTD:D0Q9FU
D-03758	O=C(c1ccccc1)C(=O)c1ccccc1 (TTD:D0Y7FX)	O=C(C(=O)c1ccccc1)c1ccccc1	210.228	2.7522	14	TTD:D0Y7FX
D-03761	O=C(N)c1c2ncc(cc2ccc1)C#CC (TTD:D0T5TT)	CC#Cc1cnc2c(c1)cccc2C(=O)N	210.231	2.4054	13	TTD:D0T5TT
D-03764	O=C1Nc2c(/C/1=C/c1[nH]ccc1)cccc2 (TTD:D00ATA)	O=C1Nc2c(/C/1=C/c1[nH]ccc1)cccc2	210.231	2.6454	13	TTD:D00ATA
D-03765	O=C1Nc2c(C1)cc(cc2)c1cccnc1 (TTD:D0K2DR)	O=C1Nc2c(C1)cc(cc2)c1cccnc1	210.231	2.3812	13	TTD:D0K2DR
D-03767	Oc1cc2ncn(c2cc1)c1ccccc1 (TTD:D00YCU)	Oc1ccc2c(c1)ncn2c1ccccc1	210.231	2.7311	13	TTD:D00YCU
D-03768	o1c2c(nc1Nc1ccccc1)cccc2 (TTD:D00JPV)	c1ccc(cc1)Nc1nc2c(o1)cccc2	210.231	3.6444	13	TTD:D00JPV
D-03770	[nH]1c2c(nc1c1ncccc1)ccc(N)c2 (TTD:D0L6ZY)	Nc1ccc2c(c1)[nH]c(n2)c1ccccn1	210.235	2.7883	12	TTD:D0L6ZY
D-03777	Br.O=C1N(C(=O)CC21CCN(CC2)C)CC (TTD:D05HKB)	CCN1C(=O)CC2(C1=O)CCN(CC2)C	210.273	0.353	11	TTD:D05HKB					Alzheimer disease (TTD:D05HKB)
D-03781	N1C(=NCC1)Cc1cc2c(cc1)cccc2 (TTD:D04VNR)	C1CN=C(N1)Cc1ccc2c(c1)cccc2	210.274	2.1484	14	TTD:D04VNR
D-03782	C(C1=NCCN1)C1=CC=CC2=CC=CC=C12 (DrugBank:DB06711)|C1CN=C(N1)Cc1cccc2c1cccc2 (IUPHAR:5509)|Cl.c12c(CC3=NCCN3)cccc1cccc2 (KEGG:D00743)|[N+](=O)([O-])O.c12c(CC3=NCCN3)cccc1cccc2 (KEGG:D01021)|c12c(CC3=NCCN3)cccc1cccc2 (KEGG:D08253)|N1C(=NCC1)Cc1c2c(ccc1)cccc2 (TTD:D0O6IZ)	C1CN=C(N1)Cc1cccc2c1cccc2	210.274	2.1484	14	DrugBank:DB06711|IUPHAR:5509|KEGG:D00743|KEGG:D01021|KEGG:D08253|TTD:D0O6IZ	Naphazoline (DrugBank:DB06711)|naphazoline (IUPHAR:5509)|Naphazoline hydrochloride (JP17/USP) (KEGG:D00743)|Naphazoline nitrate (JP17) (KEGG:D01021)|Naphazoline (INN) (KEGG:D08253)|Naphazoline (TTD:D0O6IZ)	Approved; Investigational (DrugBank:DB06711)|Approved (IUPHAR:5509)	835-31-4 (DrugBank:DB06711)|550-99-2 (KEGG:D00743)|5144-52-5 (KEGG:D01021)|835-31-4 (KEGG:D08253)	R01AA08; R01AB02; S01GA01; S01GA51 (DrugBank:DB06711)|R01AA08; R01AB02; S01GA01 (KEGG:D00743)|R01AA08; R01AB02; S01GA01 (KEGG:D01021)|R01AA08; R01AB02; S01GA01 (KEGG:D08253)	Naphazoline is primarily indicated in conditions like Corneal vascularity, Hyperaemia, Itching, Nasal congestion, and can also be given in adjunctive therapy as an alternative drug of choice in Sinusitis (DrugBank:DB06711)|Synthetic organic (IUPHAR:5509)|Vasoconstrictor, alpha1-Adrenergic receptor agonist (KEGG:D00743)|Vasoconstrictor, alpha1-Adrenergic receptor agonist (KEGG:D01021)|Vasoconstric…
D-03784	Nc1cc(/C=C/c2ccc(N)cc2)ccc1 (TTD:D0Q6XB)	Nc1ccc(cc1)/C=C/c1cccc(c1)N	210.274	4.1838	14	TTD:D0Q6XB
D-03785	N1(CCc2c(C1)cccc2)c1ccncc1 (TTD:D0B4DP)	n1ccc(cc1)N1CCc2c(C1)cccc2	210.274	2.7093	14	TTD:D0B4DP
D-03786	CN(C)C1=NC(=NC(=N1)N(C)C)N(C)C (DrugBank:DB00488)|CN(c1nc(nc(n1)N(C)C)N(C)C)C (IUPHAR:7112)|c1(nc(nc(n1)N(C)C)N(C)C)N(C)C (KEGG:D02841)|N(c1nc(N(C)C)nc(N(C)C)n1)(C)C (TTD:D02LPF)	CN(c1nc(nc(n1)N(C)C)N(C)C)C	210.279	0.0696	9	DrugBank:DB00488|IUPHAR:7112|KEGG:D02841|TTD:D02LPF	Altretamine (DrugBank:DB00488)|altretamine (IUPHAR:7112)|Altretamine (USP/INN) (KEGG:D02841)|Altretamine (TTD:D02LPF)	Approved (DrugBank:DB00488)|Approved (IUPHAR:7112)	645-05-6 (DrugBank:DB00488)|645-05-6 (KEGG:D02841)	L01XX03 (DrugBank:DB00488)|L01XX03 (KEGG:D02841)	For use as a single agent in the palliative treatment of patients with persistent or recurrent ovarian cancer following first-line therapy with a cisplatin and/or alkylating agent-based combination. (DrugBank:DB00488)|Synthetic organic (IUPHAR:7112)|Antineoplastic, Alkylating agent (KEGG:D02841)|Ovarian cancer (TTD:D02LPF)
D-03789	C\C(C=C)=C/[C@@]1(C)SC(=O)C(C)=C1O (DrugBank:DB04302)	C=C/C(=C/[C@@]1(C)SC(=O)C(=C1O)C)/C	210.293	2.9828	11	DrugBank:DB04302	4-Hydroxy-3,5-Dimethyl-5-(2-Methyl-Buta-1,3-Dienyl)-5h-Thiophen-2-One (DrugBank:DB04302)	Experimental (DrugBank:DB04302)	82079-32-1 (DrugBank:DB04302)
D-03791	[H][C@]1(CCC)COC2=C(SC=C2)C(=N)N1 (DrugBank:DB07001)	CCC[C@H]1COc2c(C(=N)N1)scc2	210.296	2.6527	10	DrugBank:DB07001	(3S,5E)-3-propyl-3,4-dihydrothieno[2,3-f][1,4]oxazepin-5(2H)-imine (DrugBank:DB07001)	Experimental (DrugBank:DB07001)
D-03795	c1c(cc(cc1[N+](=O)[O-])[N+](=O)[O-])C(=O)N (KEGG:D05191)	NC(=O)c1cc(cc(c1)N(=O)=O)N(=O)=O	211.132	2.3486	7	KEGG:D05191	Nitromide (USAN) (KEGG:D05191)		121-81-3 (KEGG:D05191)		Antibacterial, Coccidiostat (for poultry) (KEGG:D05191)
D-03800	[O-][N+](=O)OCCNC(=O)C1=CC=CN=C1 (DrugBank:DB09220)|[O-][N+](=O)OCCNC(=O)c1cccnc1 (IUPHAR:2411)|c1ccc(cn1)C(=O)NCCO[N+](=O)[O-] (KEGG:D01810)|O([N+](=O)[O-])CCNC(=O)c1cccnc1 (TTD:D0O2SR)	O=N(=O)OCCNC(=O)c1cccnc1	211.175	0.9338	8	DrugBank:DB09220|IUPHAR:2411|KEGG:D01810|TTD:D0O2SR	Nicorandil (DrugBank:DB09220)|nicorandil (IUPHAR:2411)|Nicorandil (JP17/USAN/INN) (KEGG:D01810)|Nicorandil (TTD:D0O2SR)	Approved; Investigational (DrugBank:DB09220)|Approved (IUPHAR:2411)	65141-46-0 (DrugBank:DB09220)|65141-46-0 (KEGG:D01810)	C01DX16 (DrugBank:DB09220)|C01DX16 (KEGG:D01810)	Indicated for the prevention and treatment of chronic stable angina pectoris and reduction in the risk of acute coronary syndromes. (DrugBank:DB09220)|Synthetic organic (IUPHAR:2411)|Vasodilator (coronary) (KEGG:D01810)|Angina pectoris (TTD:D0O2SR)
D-03801	c1(c(ccc(c1)C[C@@H](C(=O)OC)N)O)O (KEGG:D07304)|O(C(=O)[C@@H](N)Cc1cc(O)c(O)cc1)C (TTD:D0U0OT)	COC(=O)[C@H](Cc1ccc(c(c1)O)O)N	211.215	0.8409	10	KEGG:D07304|TTD:D0U0OT	Melevodopa (INN) (KEGG:D07304)|Melevodopa (TTD:D0U0OT)		7101-51-1 (KEGG:D07304)	N04BA04 (KEGG:D07304)	Antiparkinsonian (KEGG:D07304)|Parkinson's disease (TTD:D0U0OT)
D-03802	C[C@](N)(CC1=CC=C(O)C(O)=C1)C(O)=O (DrugBank:DB00968)|OC(=O)[C@](Cc1ccc(c(c1)O)O)(N)C (IUPHAR:5217)|[C@@](C(=O)O)(Cc1cc(c(cc1)O)O)(C)N.O.[C@@](C(=O)O)(Cc1cc(c(O)cc1)O)(C)N.O.O (KEGG:D00405)|[C@@](C(=O)O)(Cc1cc(c(cc1)O)O)(C)N (KEGG:D08205)|OC(=O)[C@@](N)(Cc1cc(O)c(O)cc1)C (TTD:D0BA6T)	OC(=O)[C@](Cc1ccc(c(c1)O)O)(N)C	211.215	1.1426	10	DrugBank:DB00968|IUPHAR:5217|KEGG:D00405|KEGG:D08205|TTD:D0BA6T	Methyldopa (DrugBank:DB00968)|L-&alpha;-methyldopa (IUPHAR:5217)|Methyldopa (USP) (KEGG:D00405)|Methyldopa (INN) (KEGG:D08205)|Methyldopa (TTD:D0BA6T)	Approved (DrugBank:DB00968)|Approved (IUPHAR:5217)	555-30-6 (DrugBank:DB00968)|41372-08-1 (KEGG:D00405)|555-30-6 (KEGG:D08205)	C02AB01 (KEGG:D00405)|C02AB01 (KEGG:D08205)	For use in the treatment of hypertension. (DrugBank:DB00968)|Synthetic organic (IUPHAR:5217)|Antihypertensive, alpha2-Adrenergic receptor agonist (KEGG:D00405)|Antihypertensive, alpha2-Adrenergic receptor agonist (KEGG:D08205)|Hypertension (TTD:D0BA6T)
D-03804	[O-]C(=O)C[C@H]1[C@H](CN[C@@H]1C(=O)[O-])C(=C)C (IUPHAR:4085)|[O-]C(=O)C[C@H]1[C@H](CN[C@@H]1C(=O)[O-])C(=C)C (IUPHAR:4231)|[O-]C(=O)[C@H]1NC[C@@H]([C@@H]1CC(=O)[O-])C(=C)C (TTD:D04FEN)|[O-]C(=O)[C@H]1NC[C@@H]([C@@H]1CC(=O)[O-])C(=C)C (TTD:D04PFN)	[O-]C(=O)C[C@H]1[C@H](CN[C@@H]1C(=O)[O-])C(=C)C	211.215	-2.0146	10	IUPHAR:4085|IUPHAR:4231|TTD:D04FEN|TTD:D04PFN	[<sup>3</sup>H]kainate (IUPHAR:4085)|kainate (IUPHAR:4231)	Labelled; Radioactive (IUPHAR:4085)			Natural product (IUPHAR:4085)|Natural product (IUPHAR:4231)
D-03805	NC1=NC(=O)N(C=C1)[C@H]1CC[C@@H](CO)O1 (DrugBank:DB00943)|Nc1ccn(c(=O)n1)[C@H]1CC[C@H](O1)CO (IUPHAR:4828)|C1[C@@H](O[C@@H](C1)CO)n1c(=O)nc(cc1)N (KEGG:D00412)|O1[C@@H](n2ccc(nc2=O)N)CC[C@H]1CO (TTD:D0DC7N)|O1[C@@H](n2ccc(nc2=O)N)CC[C@H]1CO (TTD:D0M1YO)|O1[C@@H](n2ccc(nc2=O)N)CC[C@H]1CO (TTD:D0Z9QR)	Nc1ccn(c(=O)n1)[C@H]1CC[C@H](O1)CO	211.218	0.0766	9	DrugBank:DB00943|IUPHAR:4828|KEGG:D00412|TTD:D0DC7N|TTD:D0M1YO|TTD:D0Z9QR	Zalcitabine (DrugBank:DB00943)|zalcitabine (IUPHAR:4828)|Zalcitabine (JAN/USP/INN) (KEGG:D00412)|Zalcitabine (TTD:D0Z9QR)	Approved; Investigational (DrugBank:DB00943)|Approved (IUPHAR:4828)	7481-89-2 (DrugBank:DB00943)|7481-89-2 (KEGG:D00412)	J05AF03 (DrugBank:DB00943)|J05AF03 (KEGG:D00412)	For the treatment of Human immunovirus (HIV) infections in conjunction with other antivirals. (DrugBank:DB00943)|Synthetic organic (IUPHAR:4828)|Antiviral, Reverse transcriptase inhibitor (KEGG:D00412)|Human immunodeficiency virus infection (TTD:D0Z9QR)
D-03806	CC1=C(C=C(C#N)C(=O)N1)C1=CC=NC=C1 (DrugBank:DB00235)|N#Cc1cc(c2ccncc2)c([nH]c1=O)C (IUPHAR:5225)|c1(c2ccncc2)cc(c(=O)[nH]c1C)C#N (KEGG:D00417)|c1(c2ccncc2)cc(c(=O)[nH]c1C)C#N.C(C(=O)O)(C)O (KEGG:D02085)|O=c1[nH]c(c(c2ccncc2)cc1C#N)C (TTD:D0Y9ZE)	N#Cc1cc(c2ccncc2)c([nH]c1=O)C	211.219	1.61698	12	DrugBank:DB00235|IUPHAR:5225|KEGG:D00417|KEGG:D02085|TTD:D0Y9ZE	Milrinone (DrugBank:DB00235)|milrinone (IUPHAR:5225)|Milrinone (JAN/USP/INN) (KEGG:D00417)|Milrinone lactate (KEGG:D02085)|Milrinone (TTD:D0Y9ZE)	Approved (DrugBank:DB00235)|Approved (IUPHAR:5225)	78415-72-2 (DrugBank:DB00235)|78415-72-2 (KEGG:D00417)|100286-97-3 (KEGG:D02085)	C01CE02 (DrugBank:DB00235)|C01CE02 (KEGG:D00417)|C01CE02 (KEGG:D02085)	Indicated for the treatment of congestive heart failure. (DrugBank:DB00235)|Synthetic organic (IUPHAR:5225)|Cardiotonic, Phosphodiesterase 3 inhibitor (KEGG:D00417)|Cardiotonic, Phosphodiesterase 3 inhibitor (KEGG:D02085)|Congestive heart failure (TTD:D0Y9ZE)
D-03807	O=c1[nH]c2c(ncc(N)c2)c2c1cccc2 (TTD:D0EI6X)	Nc1cnc2c(c1)[nH]c(=O)c1c2cccc1	211.219	2.2397	12	TTD:D0EI6X
D-03808	O=C1Nc2c(/C/1=C/c1[nH]cnc1)cccc2 (TTD:D0EP1G)	O=C1Nc2c(/C/1=C/c1cnc[nH]1)cccc2	211.219	2.0404	12	TTD:D0EP1G
D-03811	O=Cc1n(Cc2ccc(cc2)C#N)cnc1 (TTD:D07EJK)	O=Cc1cncn1Cc1ccc(cc1)C#N	211.219	1.61558	12	TTD:D07EJK
D-03812	N1C=CC(=N1)C1=CC(=NO1)C1=CC=CC=C1 (DrugBank:DB07613)	c1ccc(cc1)c1noc(c1)c1n[nH]cc1	211.219	2.7317	12	DrugBank:DB07613	3-phenyl-5-(1H-pyrazol-3-yl)isoxazole (DrugBank:DB07613)	Experimental (DrugBank:DB07613)
D-03815	[nH]1c2ncccc2c(c1)c1nc(ncc1)N (TTD:D08KSQ)	Nc1nccc(n1)c1c[nH]c2c1cccn2	211.223	2.1833	11	TTD:D08KSQ
D-03816	Nc1ncnc2c1cnn2c1ccccc1 (IUPHAR:6029)|n1(ncc2c1ncnc2N)c1ccccc1 (TTD:D04XNJ)	Nc1ncnc2c1cnn2c1ccccc1	211.223	1.9789	11	IUPHAR:6029|TTD:D04XNJ	PP3 (IUPHAR:6029)|PP3 (TTD:D04XNJ)				Synthetic organic (IUPHAR:6029)
D-03818	N(c1cc2nccnc2cc1)c1[nH]ccn1 (TTD:D0ZC4S)	c1cnc([nH]1)Nc1ccc2c(c1)nccn2	211.223	2.1695	11	TTD:D0ZC4S
D-03819	S(=O)(=O)(OCC1OC(OC1)(C)C)N (TTD:D01KOO)	CC1(C)OCC(O1)COS(=O)(=O)N	211.236	1.1391	6	TTD:D01KOO
D-03821	Cl.S(Cc1ccc([N+](=O)[O-])cc1)C(=N)N (TTD:D0W3OY)	NC(=N)SCc1ccc(cc1)N(=O)=O	211.241	3.0447	8	TTD:D0W3OY
D-03822	CC(C)NCC(O)C1=CC(O)=C(O)C=C1 (DrugBank:DB01064)|CC(NCC(c1ccc(c(c1)O)O)O)C (IUPHAR:536)|Cl.c1(cc(c(cc1)O)O)C(CNC(C)C)O (KEGG:D01390)|S(=O)(=O)(O)O.O.c1(cc(c(cc1)O)O)C(CNC(C)C)O.O.c1(cc(c(O)cc1)O)C(CNC(C)C)O (KEGG:D02066)|c1(cc(c(cc1)O)O)C(CNC(C)C)O (KEGG:D08090)|OC(CNC(C)C)c1cc(O)c(O)cc1 (TTD:D0I8FI)|OC(CNC(C)C)c1cc(O)c(O)cc1 (TTD:D0IF0C)|OC(CNC(C)C)c1cc(O)c(O)cc1 (TTD:D0P1IS)	CC(NCC(c1ccc(c(c1)O)O)O)C	211.258	1.5201	11	DrugBank:DB01064|IUPHAR:536|KEGG:D01390|KEGG:D02066|KEGG:D08090|TTD:D0I8FI|TTD:D0IF0C|TTD:D0P1IS	Isoprenaline (DrugBank:DB01064)|isoprenaline (IUPHAR:536)|Isoproterenol hydrochloride (USP) (KEGG:D01390)|Isoproterenol sulfate (USP) (KEGG:D02066)|Isoprenaline (INN) (KEGG:D08090)|Isoproterenol (TTD:D0I8FI)	Approved; Investigational (DrugBank:DB01064)|Approved (IUPHAR:536)	7683-59-2 (DrugBank:DB01064)|51-30-9 (KEGG:D01390)|6700-39-6 (KEGG:D02066)|7683-59-2 (KEGG:D08090)	C01CA02; R03AB02; R03AK02; R03CB01; R03CB51 (DrugBank:DB01064)|C01CA02; R03AB02; R03CB01 (KEGG:D01390)|C01CA02; R03AB02; R03CB01 (KEGG:D02066)|C01CA02; R03AB02; R03CB01 (KEGG:D08090)	For the treatment of mild or transient episodes of heart block that do not require electric shock or pacemaker therapy also used in management of asthma and chronic bronchitis (DrugBank:DB01064)|Synthetic organic (IUPHAR:536)|Antivertigo, Cardiotonic, Bronchodilator, beta-Adrenergic receptor agonist (KEGG:D01390)|Bronchodilator, beta-Adrenergic receptor agonist (KEGG:D02066)|Bronchodilator, beta-…
D-03823	Cl.c1(cc(c(cc1)O)O)[C@H](CNC(C)C)O (KEGG:D02150)	CC(NC[C@@H](c1ccc(c(c1)O)O)O)C	211.258	1.5201	11	KEGG:D02150	l-Isoprenaline hydrochloride (JP17) (KEGG:D02150)		5984-95-2 (KEGG:D02150)	C01CA02; R03AB02; R03CB01 (KEGG:D02150)	Bronchodilator, Cardiotonic, beta-Adrenergic receptor agonist (KEGG:D02150)
D-03824	COC1=CC(C(O)C(C)N)=C(OC)C=C1 (DrugBank:DB00723)|COc1ccc(c(c1)C(C(N)C)O)OC (IUPHAR:483)|Cl.c1(ccc(c(c1)C(C(N)C)O)OC)OC (KEGG:D01020)|c1(ccc(c(c1)C(C(N)C)O)OC)OC (KEGG:D08201)|OC(C(N)C)c1c(OC)ccc(OC)c1 (TTD:D09GYT)	COc1ccc(c(c1)C(C(N)C)O)OC	211.258	1.7847	11	DrugBank:DB00723|IUPHAR:483|KEGG:D01020|KEGG:D08201|TTD:D09GYT	Methoxamine (DrugBank:DB00723)|methoxamine (IUPHAR:483)|Methoxamine hydrochloride (JAN) (KEGG:D01020)|Methoxamine (BAN) (KEGG:D08201)|Methoxamine (TTD:D09GYT)	Approved; Investigational (DrugBank:DB00723)|Approved (IUPHAR:483)	390-28-3 (DrugBank:DB00723)|61-16-5 (KEGG:D01020)|390-28-3 (KEGG:D08201)	C01CA10 (DrugBank:DB00723)|C01CA10 (KEGG:D01020)|C01CA10 (KEGG:D08201)	Indicated for the treatment and management of hypotension. (DrugBank:DB00723)|Synthetic organic (IUPHAR:483)|Antihypotensive, alpha1-Adrenergic receptor agonist (KEGG:D01020)|Antihypotensive, alpha1-Adrenergic receptor agonist (KEGG:D08201)|Hypertension (TTD:D09GYT)
D-03825	O(c1cc(CCN)cc(OC)c1OC)C (TTD:D0L8MR)	NCCc1cc(OC)c(c(c1)OC)OC	211.258	1.9139	11	TTD:D0L8MR
D-03826	CC(C)NCC(O)C1=CC(O)=CC(O)=C1 (DrugBank:DB00816)|OC(c1cc(O)cc(c1)O)CNC(C)C (IUPHAR:7250)|c1(cc(cc(c1)O)O)C(CNC(C)C)O.S(=O)(=O)(O)O.c1(cc(cc(c1)O)O)C(CNC(C)C)O (KEGG:D00685)|c1(cc(cc(c1)O)O)C(CNC(C)C)O (KEGG:D08300)|OC(CNC(C)C)c1cc(O)cc(O)c1 (TTD:D02UFG)|OC(CNC(C)C)c1cc(O)cc(O)c1 (TTD:D0Y2MV)	OC(c1cc(O)cc(c1)O)CNC(C)C	211.258	1.5201	11	DrugBank:DB00816|IUPHAR:7250|KEGG:D00685|KEGG:D08300|TTD:D02UFG|TTD:D0Y2MV	Orciprenaline (DrugBank:DB00816)|orciprenaline (IUPHAR:7250)|Metaproterenol sulfate (USP) (KEGG:D00685)|Orciprenaline (INN) (KEGG:D08300)|Metaproterenol Sulfate (TTD:D02UFG)|Orciprenaline (TTD:D0Y2MV)	Approved (DrugBank:DB00816)|Approved (IUPHAR:7250)	586-06-1 (DrugBank:DB00816)|5874-97-5 (KEGG:D00685)|586-06-1 (KEGG:D08300)	R03AB03; R03CB03; R03CB53 (DrugBank:DB00816)|R03AB03; R03CB03 (KEGG:D00685)|R03AB03; R03CB03 (KEGG:D08300)	For the treatment of bronchospasm, chronic bronchitis, asthma, and emphysema. (DrugBank:DB00816)|Synthetic organic (IUPHAR:7250)|Bronchodilator, beta2-Adrenergic receptor agonist (KEGG:D00685)|Bronchodilator, beta2-Adrenergic receptor agonist (KEGG:D08300)|Asthma (TTD:D02UFG)|Asthma (TTD:D0Y2MV)
D-03830	O=c1c(c2n(c3c(CC2)cccc3)cc1)C (TTD:D07KDB)	O=c1ccn2c(c1C)CCc1c2cccc1	211.259	2.2445	14	TTD:D07KDB
D-03832	c12C3CNCC(c1cc1c(c2)nccn1)C3.OC(=O)[C@@H]([C@H](C(=O)O)O)O (KEGG:D06282)|c12C3CNCC(c1cc1c(c2)nccn1)C3 (KEGG:D08669)	N1CC2CC(C1)c1c2cc2c(c1)nccn2	211.262	2.1327	13	KEGG:D06282|KEGG:D08669	Varenicline tartrate (JAN/USAN) (KEGG:D06282)|Varenicline (INN) (KEGG:D08669)		375815-87-5 (KEGG:D06282)|249296-44-4 (KEGG:D08669)	N07BA03 (KEGG:D06282)|N07BA03 (KEGG:D08669)	Smoking cessation adjunct, Selective nicotinic acetylcholine receptor modulator (KEGG:D06282)|Smoking cessation adjunct, Selective nicotinic acetylcholine receptor modulator (KEGG:D08669)
D-03833	[H][C@]12C[C@]([H])(CNC1)C1=CC3=NC=CN=C3C=C21 (DrugBank:DB01273)|N1C[C@@H]2C[C@H](C1)c1c2cc2c(c1)nccn2 (IUPHAR:5459)|N1C[C@@H]2C[C@@H](c3c2cc2nccnc2c3)C1 (TTD:D0LM4A)	N1C[C@@H]2C[C@H](C1)c1c2cc2c(c1)nccn2	211.262	2.1327	13	DrugBank:DB01273|IUPHAR:5459|TTD:D0LM4A	Varenicline (DrugBank:DB01273)|varenicline (IUPHAR:5459)|Varenicline (TTD:D0LM4A)	Approved; Investigational (DrugBank:DB01273)|Approved (IUPHAR:5459)	249296-44-4 (DrugBank:DB01273)	N07BA03 (DrugBank:DB01273)	For use as an aid in smoking cessation. (DrugBank:DB01273)|Synthetic organic (IUPHAR:5459)|Smoking cessation (TTD:D0LM4A)
D-03834	N=C(NC1=CC=CC=C1)NC1=CC=CC=C1 (DrugBank:DB14191)	N=C(Nc1ccccc1)Nc1ccccc1	211.262	3.3911	13	DrugBank:DB14191	Diphenylguanidine (DrugBank:DB14191)	Approved; Experimental (DrugBank:DB14191)	102-06-7 (DrugBank:DB14191)		Diphenylguanidine is approved for use within allergenic epicutaneous patch tests which are indicated for use as an aid in the diagnosis of allergic contact dermatitis (ACD) in persons 6 years of age and older. (DrugBank:DB14191)
D-03835	n1(CC2=CCCc3ncccc23)ccnc1 (TTD:D0Y0QI)	c1cnc2c(c1)C(=CCC2)Cn1cncc1	211.262	2.3079	13	TTD:D0Y0QI
D-03836	NC(=O)c1ccc2c(c1)c(c[nH]2)C(C(N)([3H])[3H])([3H])[3H] (IUPHAR:262)|O=C(N)c1cc2c(C(C(N)([3H])[3H])([3H])[3H])c[nH]c2cc1 (TTD:D08PJK)	NC(=O)c1ccc2c(c1)c(c[nH]2)C(C(N)([3H])[3H])([3H])[3H]	211.273	2.1686	11	IUPHAR:262|TTD:D08PJK	[<sup>3</sup>H]5-CT (IUPHAR:262)|[3H]5-CT (TTD:D08PJK)	Labelled; Radioactive (IUPHAR:262)			Synthetic organic (IUPHAR:262)
D-03843	NCCC(c1ccccc1)c1ccccc1 (TTD:D0B0PP)	NCCC(c1ccccc1)c1ccccc1	211.302	3.8676	15	TTD:D0B0PP
D-03844	NCCc1cc(c2c(cccc2)C)ccc1 (TTD:D0I0ML)	NCCc1cccc(c1)c1ccccc1C	211.302	3.8635	15	TTD:D0I0ML
D-03849	CCCN[C@H]1CCC2=C(C1)SC(N)=N2 (DrugBank:DB00413)|CCCN[C@H]1CCc2c(C1)sc(n2)N (IUPHAR:953)|c12c(C[C@H](CC2)NCCC)sc(n1)N.Cl.O.Cl (KEGG:D00559)|c12c(C[C@H](CC2)NCCC)sc(n1)N (KEGG:D05575)|s1c2C[C@@H](NCCC)CCc2nc1N (TTD:D0G8NN)	CCCN[C@H]1CCc2c(C1)sc(n2)N	211.327	2.5543	10	DrugBank:DB00413|IUPHAR:953|KEGG:D00559|KEGG:D05575|TTD:D0G8NN	Pramipexole (DrugBank:DB00413)|pramipexole (IUPHAR:953)|Pramipexole hydrochloride (USAN) (KEGG:D00559)|Pramipexole (USAN/INN) (KEGG:D05575)|Pramipexole (TTD:D0G8NN)	Approved; Investigational (DrugBank:DB00413)|Approved (IUPHAR:953)	104632-26-0 (DrugBank:DB00413)|191217-81-9 (KEGG:D00559)|104632-26-0 (KEGG:D05575)	N04BC05 (DrugBank:DB00413)|N04BC05 (KEGG:D00559)|N04BC05 (KEGG:D05575)	For the treatment of signs and symptoms of idiopathic Parkinson's disease (DrugBank:DB00413)|Synthetic organic (IUPHAR:953)|Antidepressant, Antiparkinsonian, Dopamine receptor agonist (KEGG:D00559)|Antiparkinsonian, Antidepressant, Dopamine receptor agonist (KEGG:D05575)|Parkinson's disease (TTD:D0G8NN)
D-03852	Clc1cccc(c1)N=C(N=C(N)N)N (IUPHAR:2287)|Clc1cccc(c1)N=C(N=C(N)N)N (IUPHAR:2304)	Clc1cccc(c1)N=C(N=C(N)N)N	211.651	2.6605	8	IUPHAR:2287|IUPHAR:2304	<i>meta</i>-chlorphenylbiguanide (IUPHAR:2287)|[<sup>3</sup>H]<i>meta</i>-chlorophenylbiguanide (IUPHAR:2304)	Labelled; Radioactive (IUPHAR:2304)			Synthetic organic (IUPHAR:2287)|Synthetic organic (IUPHAR:2304)
D-03853	Clc1cc(C(=O)C(N(C)C)C)ccc1 (TTD:D0Q8IQ)	CN(C(C(=O)c1cccc(c1)Cl)C)C	211.688	2.4728	11	TTD:D0Q8IQ
D-03854	Clc1ccc(C2OC(CC2)CN)cc1 (TTD:D0RT9B)	NCC1CCC(O1)c1ccc(cc1)Cl	211.688	3.2191	11	TTD:D0RT9B
D-03858	[H][C@]1(CCCN1C(=O)[C@]1([H])CCCN1)B(O)O (DrugBank:DB07482)	OB([C@@H]1CCCN1C(=O)[C@@H]1CCCN1)O	212.054	-0.572	9	DrugBank:DB07482	(2R)-N-[(2R)-2-(DIHYDROXYBORYL)-1-L-PROLYLPYRROLIDIN-2-YL]-N-[(5R)-5-(DIHYDROXYBORYL)-1-L-PROLYLPYRROLIDIN-2-YL]-L-PROLINAMIDE (DrugBank:DB07482)	Experimental (DrugBank:DB07482)
D-03859	P(=O)(O)(O)C(CCC(=O)O)C(=O)O (TTD:D0A1FL)	OC(=O)CCC(P(=O)(O)O)C(=O)O	212.095	-0.5179	5	TTD:D0A1FL
D-03863	FC(c1ccccc1n1cncc1)(F)F (IUPHAR:4331)|FC(F)(F)c1c(n2ccnc2)cccc1 (TTD:D0B3AR)	FC(c1ccccc1n1cncc1)(F)F	212.171	2.8911	10	IUPHAR:4331|TTD:D0B3AR	TRIM (IUPHAR:4331)				Synthetic organic (IUPHAR:4331)
D-03865	CCCOC(=O)C1=CC(O)=C(O)C(O)=C1 (DrugBank:DB12450)|c1c(c(c(cc1C(=O)OCCC)O)O)O (KEGG:D02382)	CCCOC(=O)c1cc(O)c(c(c1)O)O	212.199	1.3702	10	DrugBank:DB12450|KEGG:D02382	Propyl Gallate (DrugBank:DB12450)|Propyl gallate (NF) (KEGG:D02382)	Investigational (DrugBank:DB12450)	121-79-9 (DrugBank:DB12450)|121-79-9 (KEGG:D02382)		Pharmaceutic aid (antioxidant) (KEGG:D02382)
D-03872	Oc1cc2CCC(=C(C#N)C#N)c2cc1O (TTD:D07IHD)	N#CC(=C1CCc2c1cc(O)c(c2)O)C#N	212.204	1.84476	12	TTD:D07IHD
D-03873	Oc1c2CCC(=C(C#N)C#N)c2ccc1O (TTD:D02RIG)	N#CC(=C1CCc2c1ccc(c2O)O)C#N	212.204	1.84476	12	TTD:D02RIG
D-03874	NC1=CC=C2C(=O)NC(=O)C3=CC=CC1=C23 (DrugBank:DB07096)|O=c1[nH]c(=O)c2c3c(c(N)ccc13)ccc2 (TTD:D03JTS)|O=c1[nH]c(=O)c2c3c(c(N)ccc13)ccc2 (TTD:D09VUP)	Nc1ccc2c3c1cccc3c(=O)[nH]c2=O	212.204	1.6427	12	DrugBank:DB07096|TTD:D03JTS|TTD:D09VUP	6-AMINO-BENZO[DE]ISOQUINOLINE-1,3-DIONE (DrugBank:DB07096)	Experimental (DrugBank:DB07096)
D-03878	NS(=O)(=O)CC1=NOC2=CC=CC=C12 (DrugBank:DB00909)|NS(=O)(=O)Cc1noc2c1cccc2 (IUPHAR:7047)|c12c(noc1cccc2)CS(=O)(=O)N (KEGG:D00538)|S(=O)(=O)(N)Cc1noc2c1cccc2 (TTD:D09ZIS)	NS(=O)(=O)Cc1noc2c1cccc2	212.226	2.3974	8	DrugBank:DB00909|IUPHAR:7047|KEGG:D00538|TTD:D09ZIS	Zonisamide (DrugBank:DB00909)|zonisamide (IUPHAR:7047)|Zonisamide (JAN/USAN/INN) (KEGG:D00538)|Zonisamide (TTD:D09ZIS)	Approved; Investigational (DrugBank:DB00909)|Approved (IUPHAR:7047)	68291-97-4 (DrugBank:DB00909)|68291-97-4 (KEGG:D00538)	G01AE10; N03AX15 (DrugBank:DB00909)|N03AX15 (KEGG:D00538)	For use as adjunctive treatment of partial seizures in adults with epilepsy. (DrugBank:DB00909)|Synthetic organic (IUPHAR:7047)|Anticonvulsant, Antiepileptic, Antiparkinsonian (KEGG:D00538)|Epilepsy (TTD:D09ZIS)
D-03883	O=C1c2cc3CCCCc3cc2C(=O)C=C1 (TTD:D0SI7S)	O=C1C=CC(=O)c2c1cc1CCCCc1c2	212.244	2.5006	14	TTD:D0SI7S
D-03885	OC(=O)CC1=CC=C(C=C1)C1=CC=CC=C1 (DrugBank:DB07477)|c1cccc(c1)c1ccc(cc1)CC(=O)O (KEGG:D01675)|C(=O)(Cc1ccc(c2ccccc2)cc1)O (TTD:D0Y7EM)	OC(=O)Cc1ccc(cc1)c1ccccc1	212.244	2.9807	14	DrugBank:DB07477|KEGG:D01675|TTD:D0Y7EM	Felbinac (DrugBank:DB07477)|Felbinac (JP17/USAN/INN) (KEGG:D01675)|Felbinac (TTD:D0Y7EM)	Experimental (DrugBank:DB07477)	5728-52-9 (DrugBank:DB07477)|5728-52-9 (KEGG:D01675)	M02AA08 (DrugBank:DB07477)|M02AA08 (KEGG:D01675)	Analgesic, Anti-inflammatory, COX inhibitor (KEGG:D01675)|Arthritis (TTD:D0Y7EM)
D-03886	OC(C(=O)C1=CC=CC=C1)C1=CC=CC=C1 (DrugBank:DB14020)|OC(c1ccccc1)C(=O)c1ccccc1 (TTD:D0Z5KQ)	OC(C(=O)c1ccccc1)c1ccccc1	212.244	2.6029	14	DrugBank:DB14020|TTD:D0Z5KQ	Benzoin (DrugBank:DB14020)	Approved; Experimental (DrugBank:DB14020)	119-53-9 (DrugBank:DB14020)		No approved therapeutic indications. (DrugBank:DB14020)
D-03890	O(c1ncc2[nH]c3c(c2c1)cccc3)CC (TTD:D01CUR)|O(c1ncc2[nH]c3c(c2c1)cccc3)CC (TTD:D09GGQ)	CCOc1ncc2c(c1)c1ccccc1[nH]2	212.247	3.1148	13	TTD:D01CUR|TTD:D09GGQ
D-03891	COC1=CC=C2C(NC3=C2C=CN=C3C)=C1 (DrugBank:DB07919)|COc1ccc2c(c1)[nH]c1c2ccnc1C (IUPHAR:9352)|O(c1cc2[nH]c3c(c2cc1)ccnc3C)C (TTD:D00OWF)|O(c1cc2[nH]c3c(c2cc1)ccnc3C)C (TTD:D0V4XE)	COc1ccc2c(c1)[nH]c1c2ccnc1C	212.247	3.0331	13	DrugBank:DB07919|IUPHAR:9352|TTD:D00OWF|TTD:D0V4XE	7-METHOXY-1-METHYL-9H-BETA-CARBOLINE (DrugBank:DB07919)|harmine (IUPHAR:9352)	Experimental (DrugBank:DB07919)			Synthetic organic (IUPHAR:9352)
D-03893	Oc1c(c2c([nH]c3c2nccc3)cc1C)C (TTD:D0E5QE)	Cc1cc2[nH]c3c(c2c(c1O)C)nccc3	212.247	3.0385	13	TTD:D0E5QE
D-03895	O=C(NC1=CC=CC=C1)NC1=CC=CC=C1 (DrugBank:DB07496)|O=C(Nc1ccccc1)Nc1ccccc1 (TTD:D0X7IM)	O=C(Nc1ccccc1)Nc1ccccc1	212.247	3.4766	13	DrugBank:DB07496|TTD:D0X7IM	1,3-DIPHENYLUREA (DrugBank:DB07496)	Experimental (DrugBank:DB07496)
D-03896	O=C(Nc1c(N)cccc1)c1ccccc1 (TTD:D0U8FC)	O=C(c1ccccc1)Nc1ccccc1N	212.247	3.1753	13	TTD:D0U8FC
D-03901	n1c(N=C(N)N)cc(c2ccccc2)cc1 (TTD:D07PSW)	NC(=Nc1nccc(c1)c1ccccc1)N	212.25	3.0541	12	TTD:D07PSW
D-03903	S(=O)(=O)(N)c1cc2CC(N)Cc2cc1 (TTD:D07CYN)	NC1Cc2c(C1)cc(cc2)S(=O)(=O)N	212.269	2.2413	9	TTD:D07CYN
D-03904	S(=O)(=O)(N)CC/N=C/c1ccccc1 (TTD:D0U0QW)	NS(=O)(=O)CC/N=C/c1ccccc1	212.269	2.1751	9	TTD:D0U0QW
D-03905	NS(=O)(=O)C1=CC2=C(CCNC2)C=C1 (DrugBank:DB03468)|S(=O)(=O)(N)c1cc2c(CCNC2)cc1 (TTD:D0H1WR)	NS(=O)(=O)c1ccc2c(c1)CNCC2	212.269	2.0896	9	DrugBank:DB03468|TTD:D0H1WR	1,2,3,4-Tetrahydro-Isoquinoline-7-Sulfonic Acid Amide (DrugBank:DB03468)|SK&F-29661 (TTD:D0H1WR)	Experimental (DrugBank:DB03468)
D-03908	CC(C)(C1=CC=CC=C1)C1=CC=C(O)C=C1 (DrugBank:DB06902)	Oc1ccc(cc1)C(c1ccccc1)(C)C	212.287	3.7181	15	DrugBank:DB06902	4-(1-methyl-1-phenylethyl)phenol (DrugBank:DB06902)	Experimental (DrugBank:DB06902)
D-03913	CCC1(CC2=CC=CC=C2C1)C1=CN=CN1 (DrugBank:DB11481)|c1ccc2c(c1)CC(C2)(c1cnc[nH]1)CC (KEGG:D03002)|[nH]1c(C2(Cc3c(C2)cccc3)CC)cnc1 (TTD:D05OVC)	CCC1(Cc2c(C1)cccc2)c1cnc[nH]1	212.29	2.8563	14	DrugBank:DB11481|KEGG:D03002|TTD:D05OVC	Atipamezole (DrugBank:DB11481)|Atipamezole (USAN/INN) (KEGG:D03002)	Investigational; Vet_approved (DrugBank:DB11481)	104054-27-5 (DrugBank:DB11481)|104054-27-5 (KEGG:D03002)		For the reversal of the sedative and analgesic effects of dexmedetomidine and medetomidine in dogs. (DrugBank:DB11481)|Antidepressant, alpha2-Adrenergic receptor antagonist (KEGG:D03002)|Male sexual disorders (TTD:D05OVC)
D-03917	N1(CCNCC1)c1cc2c(cc1)cccc2 (TTD:D0W2YN)	N1CCN(CC1)c1ccc2c(c1)cccc2	212.29	2.6432	14	TTD:D0W2YN
D-03918	N1CCN(CC1)c1cccc2c1cccc2 (IUPHAR:3)|N1(CCNCC1)c1c2c(ccc1)cccc2 (TTD:D03TDN)|N1(CCNCC1)c1c2c(ccc1)cccc2 (TTD:D04YOT)	N1CCN(CC1)c1cccc2c1cccc2	212.29	2.6432	14	IUPHAR:3|TTD:D03TDN|TTD:D04YOT	1-naphthylpiperazine (IUPHAR:3)|1-naphthylpiperazine (TTD:D03TDN)				Synthetic organic (IUPHAR:3)
D-03921	Nc1cc(CCc2ccc(N)cc2)ccc1 (TTD:D08KLN)	Nc1ccc(cc1)CCc1cccc(c1)N	212.29	3.7986	14	TTD:D08KLN
D-03924	Clc1cc2[nH]c(=O)n(O)c(=O)c2cc1 (TTD:D05VVC)	Clc1ccc2c(c1)[nH]c(=O)n(c2=O)O	212.59	0.5805	8	TTD:D05VVC
D-03929	N[C@@H]([C@H](O)C1=CC(O)=C(O)C=C1)C(O)=O (DrugBank:DB06262)|OC(=O)[C@H]([C@@H](c1ccc(c(c1)O)O)O)N (IUPHAR:7391)|c1(c(ccc(c1)[C@H]([C@@H](C(=O)O)N)O)O)O (KEGG:D01277)|O[C@@H]([C@H](N)C(=O)O)c1cc(O)c(O)cc1 (TTD:D0I3RO)	OC(=O)[C@H]([C@@H](c1ccc(c(c1)O)O)O)N	213.187	0.2434	9	DrugBank:DB06262|IUPHAR:7391|KEGG:D01277|TTD:D0I3RO	Droxidopa (DrugBank:DB06262)|droxidopa (IUPHAR:7391)|Droxidopa (JP17/INN) (KEGG:D01277)	Approved; Investigational (DrugBank:DB06262)|Approved (IUPHAR:7391)	23651-95-8 (DrugBank:DB06262)|23651-95-8 (KEGG:D01277)	C01CA27 (DrugBank:DB06262)|C01CA27 (KEGG:D01277)	For treatment of neurogenic orthostatic hypotension (NOH) associated with various disorders including Multiple System Atrophy, Familial Amyloid Polyneuropathy, hemodialysis induced hypotension and Parkinson's Disease. Also investigated for use/treatment in neurologic disorders, nephropathy, blood (blood forming organ disorders, unspecified), and dizzy/fainting spells. (DrugBank:DB06262)|Synthetic…
D-03936	Fc1cc2[nH]c(nc2cc1)c1ncccc1 (TTD:D07PXR)	Fc1ccc2c(c1)[nH]c(n2)c1ccccn1	213.21	2.764	12	TTD:D07PXR
D-03938	O.N1C[C@@H]([C@@H]([C@H]1C(=O)O)CC(=O)O)C(=C)C (KEGG:D02546)	OC(=O)C[C@H]1[C@H](CN[C@@H]1C(=O)O)C(=C)C	213.23	0.6548	10	KEGG:D02546	Kainic acid hydrate (JP17) (KEGG:D02546)		487-79-6 (KEGG:D02546)		Anthelmintic (KEGG:D02546)
D-03940	n1cccc(c1)C(=O)OCc1ccccc1 (KEGG:D01419)	O=C(c1cccnc1)OCc1ccccc1	213.232	2.4386	13	KEGG:D01419	Benzyl nicotinate (JAN) (KEGG:D01419)		94-44-0 (KEGG:D01419)	C04AC01; C10AD02 (KEGG:D01419)	Vasodilator (KEGG:D01419)
D-03941	OC(=O)c1ccccc1Nc1ccccc1 (IUPHAR:4182)|OC(=O)c1c(Nc2ccccc2)cccc1 (TTD:D03APP)	OC(=O)c1ccccc1Nc1ccccc1	213.232	3.2014	13	IUPHAR:4182|TTD:D03APP	diphenylamine-2-carboxylic acid (IUPHAR:4182)|diphenylamine-2-carboxylic acid (TTD:D03APP)				Synthetic organic (IUPHAR:4182)
D-03943	O=C(NO)/C=C/c1c2c(ccc1)cccc2 (TTD:D0V1HA)	ONC(=O)/C=C/c1cccc2c1cccc2	213.232	2.7493	13	TTD:D0V1HA
D-03946	O1c2c(OCC1)ccc(c2)c1cccnc1 (TTD:D0I9PA)	c1ccc(cn1)c1ccc2c(c1)OCCO2	213.232	2.5198	13	TTD:D0I9PA
D-03948	Cc1ccc(c(n1)/N=N/c1ccccc1)O (IUPHAR:1431)|Cc1ccc(c(n1)/N=N/c1ccccc1)O (TTD:D0Q6VH)	Cc1ccc(c(n1)/N=N/c1ccccc1)O	213.235	3.511	12	IUPHAR:1431|TTD:D0Q6VH	SIB-1757 (IUPHAR:1431)				Synthetic organic (IUPHAR:1431)
D-03949	O=c1[nH]c2cc3c(c(ccc3nc2[nH]1)C)C (TTD:D08NXX)	Cc1ccc2c(c1C)cc1c(n2)[nH]c(=O)[nH]1	213.235	2.0212	12	TTD:D08NXX
D-03951	O=C(Nc1c(N)cccc1)c1cccnc1 (TTD:D04UVL)	O=C(c1cccnc1)Nc1ccccc1N	213.235	2.5703	12	TTD:D04UVL
D-03953	O=C1Nc2c(CC1)cc(n1ccnc1)cc2 (TTD:D04KDB)	O=C1CCc2c(N1)ccc(c2)n1ccnc1	213.235	1.895	12	TTD:D04KDB
D-03954	O=C1NCCc2c1cc([nH]2)c1ccncc1 (IUPHAR:8763)|O=C1NCCc2[nH]c(cc12)c1ccncc1 (TTD:D03DZO)	O=C1NCCc2c1cc([nH]2)c1ccncc1	213.235	1.6914	12	IUPHAR:8763|TTD:D03DZO	compound 8 [PMID: 17480064] (IUPHAR:8763)				Synthetic organic (IUPHAR:8763)
D-03956	OCc1n(Cc2ccc(cc2)C#N)cnc1 (TTD:D08ORG)	OCc1cncn1Cc1ccc(cc1)C#N	213.235	1.29538	12	TTD:D08ORG
D-03957	N1CCN=C1Nc1cc2nccnc2cc1 (TTD:D0N7UE)	C1CN=C(N1)Nc1ccc2c(c1)nccn2	213.239	0.8383	11	TTD:D0N7UE
D-03958	NC1=NC(N)=C(C=C1)\N=N\C1=CC=CC=C1 (DrugBank:DB01438)|c1(c(nc(cc1)N)N)/N=N/c1ccccc1.Cl (KEGG:D05450)|c1(c(nc(cc1)N)N)/N=N/c1ccccc1 (KEGG:D08346)|n1c(N)c(/N=N/c2ccccc2)ccc1N (TTD:D00VUL)	Nc1ccc(c(n1)N)/N=N/c1ccccc1	213.239	3.8238	11	DrugBank:DB01438|KEGG:D05450|KEGG:D08346|TTD:D00VUL	Phenazopyridine (DrugBank:DB01438)|Phenazopyridine hydrochloride (USP) (KEGG:D05450)|Phenazopyridine (INN) (KEGG:D08346)	Approved (DrugBank:DB01438)	94-78-0 (DrugBank:DB01438)|136-40-3 (KEGG:D05450)|94-78-0 (KEGG:D08346)	G04BX06 (DrugBank:DB01438)|G04BX06 (KEGG:D05450)|G04BX06 (KEGG:D08346)	For the symptomatic relief of pain, burning, urgency, frequency, and other discomforts arising from irritation of the lower urinary tract mucosa caused by infection, trauma, surgery, endoscopic procedures, or the passage of sounds or catheters. (DrugBank:DB01438)|Analgesic (urinary tract) (KEGG:D05450)|Analgesic (urinary tract) (KEGG:D08346)|Pain (TTD:D00VUL)
D-03960	n1(c2c(c3c(nc(nc3N)N)cc2)cc1)C (TTD:D06QEN)	Nc1nc(N)c2c(n1)ccc1c2ccn1C	213.239	2.4483	11	TTD:D06QEN
D-03961	O(c1cc2c3c([nH]c2cc1)c[n+](cc3)C)C (TTD:D0XI4U)	COc1ccc2c(c1)c1cc[n+](cc1[nH]2)C	213.255	2.1542	13	TTD:D0XI4U
D-03962	Oc1cc2c3c(n(c2cc1)C)c[n+](cc3)C (TTD:D0ER5C)	C[n+]1ccc2c(c1)n(C)c1c2cc(cc1)O	213.255	1.8616	13	TTD:D0ER5C
D-03963	Oc1cc2c3c([nH]c2cc1)c([n+](cc3)C)C (TTD:D09CGV)	Oc1ccc2c(c1)c1cc[n+](c(c1[nH]2)C)C	213.255	2.1596	13	TTD:D09CGV
D-03964	S(=O)(=O)(N)c1c(NCC=C)ccnc1 (TTD:D09TKG)	C=CCNc1ccncc1S(=O)(=O)N	213.257	2.181	8	TTD:D09TKG
D-03972	N1CCN(CC1)c1ccc2c(n1)cccc2 (IUPHAR:173)|c1ccc2c(c1)nc(cc2)N1CCNCC1.C(=O)(/C=C\C(=O)O)O (KEGG:D05685)|N1(CCNCC1)c1nc2c(cc1)cccc2 (TTD:D08BCF)	N1CCN(CC1)c1ccc2c(n1)cccc2	213.278	2.0382	13	IUPHAR:173|KEGG:D05685|TTD:D08BCF	quipazine (IUPHAR:173)|Quipazine maleate (USAN) (KEGG:D05685)		5786-68-5 (KEGG:D05685)		Synthetic organic (IUPHAR:173)|Antidepressant, Oxytocic, Serotonin 5-HT3 receptor agonist (KEGG:D05685)
D-03973	N1(CCNCC1)c1nccc2c1cccc2 (TTD:D0KV4G)	N1CCN(CC1)c1nccc2c1cccc2	213.278	2.0382	13	TTD:D0KV4G
D-03976	s1c(nc(c1)C#Cc1ccc(cc1)C)C (TTD:D0Z9QZ)	Cc1ccc(cc1)C#Cc1csc(n1)C	213.298	3.1597	13	TTD:D0Z9QZ
D-03977	s1c(nc(c1)C#Cc1cc(ccc1)C)C (TTD:D09LDM)	Cc1cccc(c1)C#Cc1csc(n1)C	213.298	3.1597	13	TTD:D09LDM
D-03978	s1c(nc(c1)C#Cc1c(cccc1)C)C (TTD:D0U0UB)	Cc1scc(n1)C#Cc1ccccc1C	213.298	3.1597	13	TTD:D0U0UB
D-03980	NCC(CC(O)=O)C1=CC=C(Cl)C=C1 (DrugBank:DB00181)|NCC(c1ccc(cc1)Cl)CC(=O)O (IUPHAR:1084)|c1(C(CC(=O)O)CN)ccc(cc1)Cl (KEGG:D00241)|Clc1ccc(C(CC(=O)O)CN)cc1 (TTD:D01AJY)	NCC(c1ccc(cc1)Cl)CC(=O)O	213.661	2.5573	10	DrugBank:DB00181|IUPHAR:1084|KEGG:D00241|TTD:D01AJY	Baclofen (DrugBank:DB00181)|baclofen (IUPHAR:1084)|Baclofen (JP17/USP/INN) (KEGG:D00241)|Baclofen (TTD:D01AJY)	Approved (DrugBank:DB00181)|Approved (IUPHAR:1084)	1134-47-0 (DrugBank:DB00181)|1134-47-0 (KEGG:D00241)	M03BX01 (DrugBank:DB00181)|M03BX01 (KEGG:D00241)	Baclofen is administered for the relief of signs and symptoms of spasticity resulting from multiple sclerosis, particularly for the relief of flexor spasms and associated pain and clonus, in addition to muscular rigidity [FDA label]. Patients receiving this drug should have reversible spasticity for baclofen to promote the restoration of residual function. This drug is not indicated in the treatm…
D-03982	[H][C@@](CN)(CC(O)=O)C1=CC=C(Cl)C=C1 (DrugBank:DB08891)|NC[C@@H](c1ccc(cc1)Cl)CC(=O)O (IUPHAR:1064)|NC[C@@H](c1ccc(cc1)Cl)CC(=O)O (IUPHAR:3428)|c1([C@@H](CC(=O)O)CN)ccc(cc1)Cl (KEGG:D09791)|Clc1ccc([C@@H](CC(=O)O)CN)cc1 (TTD:D03ZYQ)|Clc1ccc([C@@H](CC(=O)O)CN)cc1 (TTD:D0W4PJ)	NC[C@@H](c1ccc(cc1)Cl)CC(=O)O	213.661	2.5573	10	DrugBank:DB08891|IUPHAR:1064|IUPHAR:3428|KEGG:D09791|TTD:D03ZYQ|TTD:D0W4PJ	Arbaclofen (DrugBank:DB08891)|(-)-baclofen (IUPHAR:1064)|[<sup>3</sup>H](R)-(-)-baclofen (IUPHAR:3428)|Arbaclofen (USAN) (KEGG:D09791)	Investigational (DrugBank:DB08891)|Labelled; Radioactive (IUPHAR:3428)	69308-37-8 (DrugBank:DB08891)|69308-37-8 (KEGG:D09791)		Investigated in clinical trials as a potential treatment for spasticity in multiple sclerosis, autism spectrum disorder, and social withdrawal in fragile X syndrome. (DrugBank:DB08891)|Synthetic organic (IUPHAR:1064)|Synthetic organic (IUPHAR:3428)|Muscle relaxant, GABA-B receptor agonist (KEGG:D09791)|Fragile X syndrome (TTD:D03ZYQ)
D-03986	c1ccc(c(c1)Cl)C(CNC(C)C)O.Cl.O (KEGG:D01835)	CC(NCC(c1ccccc1Cl)O)C	213.704	2.7623	11	KEGG:D01835	Clorprenaline hydrochloride (JAN/USAN) (KEGG:D01835)		5588-22-7 (KEGG:D01835)		Bronchodilator, beta2-Adrenergic receptor agonist (KEGG:D01835)
D-03987	Brc1[nH]c2c(n1)ncnc2N (TTD:D0O6NS)	Brc1nc2c([nH]1)c(N)ncn2	214.023	1.2788	5	TTD:D0O6NS
D-03988	O(c1ccc(cc1)B(O)O)c1ccccc1 (TTD:D0D2JA)	OB(c1ccc(cc1)Oc1ccccc1)O	214.025	1.1587	12	TTD:D0D2JA
D-03989	OC1=C(Cl)C=C(Cl)C2=C1N=CC=C2 (DrugBank:DB01243)|c1(cc(c2c(c1O)nccc2)Cl)Cl (KEGG:D03472)|Clc1c2c(nccc2)c(O)c(Cl)c1 (TTD:D02HWP)	Clc1cc(Cl)c2c(c1O)nccc2	214.048	3.2472	9	DrugBank:DB01243|KEGG:D03472|TTD:D02HWP	Chloroxine (DrugBank:DB01243)|Chloroxine (USAN) (KEGG:D03472)	Approved (DrugBank:DB01243)	773-76-2 (DrugBank:DB01243)|773-76-2 (KEGG:D03472)		Used in the treatment of dandruff and mild to moderately severe seborrheic dermatitis of the scalp. (DrugBank:DB01243)|Antiseborrheic (KEGG:D03472)|Erythema (TTD:D02HWP)
D-03990	ClCCNC(=O)N(CCCl)N=O (DrugBank:DB00262)|ClCCNC(=O)N(CCCl)N=O (IUPHAR:6800)|N(C(=O)NCCCl)(CCCl)N=O (KEGG:D00254)|N(C(=O)NCCCl)(N=O)CCCl.OCC (TTD:D01OXI)|ClCCN(N=O)C(=O)NCCCl (TTD:D0S9UT)	ClCCNC(=O)N(CCCl)N=O	214.05	1.5479	5	DrugBank:DB00262|IUPHAR:6800|KEGG:D00254|TTD:D01OXI|TTD:D0S9UT	Carmustine (DrugBank:DB00262)|carmustine (IUPHAR:6800)|Carmustine (JAN/USAN/INN) (KEGG:D00254)|DTI-015 (TTD:D01OXI)|Carmustine (TTD:D0S9UT)	Approved; Investigational (DrugBank:DB00262)|Approved (IUPHAR:6800)	154-93-8 (DrugBank:DB00262)|154-93-8 (KEGG:D00254)	L01AD01 (DrugBank:DB00262)|L01AD01 (KEGG:D00254)	For the treatment of brain tumors, multiple myeloma, Hodgkin's disease and Non-Hodgkin's lymphomas. (DrugBank:DB00262)|Synthetic organic (IUPHAR:6800)|Antineoplastic, Alkylating agent (KEGG:D00254)|Liver cancer (TTD:D01OXI)|Brain cancer (TTD:D0S9UT)
D-03991	CC(C)[C@H](N)C(=O)N1CCC[C@H]1B(O)O (DrugBank:DB06182)|CC([C@@H](C(=O)N1CCC[C@H]1B(O)O)N)C (IUPHAR:9892)|C1C[C@H](N(C1)C(=O)[C@H](C(C)C)N)B(O)O (KEGG:D05989)|O=S(=O)(C)O.C1C[C@H](N(C1)C(=O)[C@H](C(C)C)N)B(O)O (KEGG:D05990)|N1(C(=O)[C@@H](N)C(C)C)[C@H](B(O)O)CCC1 (TTD:D0FQ2U)	CC([C@@H](C(=O)N1CCC[C@H]1B(O)O)N)C	214.07	0.0308	9	DrugBank:DB06182|IUPHAR:9892|KEGG:D05989|KEGG:D05990|TTD:D0FQ2U	Talabostat (DrugBank:DB06182)|talabostat (IUPHAR:9892)|Talabostat (USAN/INN) (KEGG:D05989)|Talabostat mesylate (USAN) (KEGG:D05990)|Talabostat (TTD:D0FQ2U)	Investigational (DrugBank:DB06182)	149682-77-9 (DrugBank:DB06182)|149682-77-9 (KEGG:D05989)|150080-09-4 (KEGG:D05990)		Investigated for use/treatment in lymphoma (non-hodgkin's), leukemia (lymphoid), lung cancer, melanoma, and pancreatic cancer. (DrugBank:DB06182)|Synthetic organic (IUPHAR:9892)|Antineoplastic, Hematopoietic stimulant, Dipeptidyl peptidase inhibitor (KEGG:D05989)|Antineoplastic, Hematopoietic stimulant, Dipeptidyl peptidase inhibitor (KEGG:D05990)|Hematopoietic (TTD:D0FQ2U)
D-03995	o1c2c(cc3c1nc(=O)[nH]c3=O)cccc2 (TTD:D02AYX)	O=c1nc2oc3ccccc3cc2c(=O)[nH]1	214.177	0.9811	11	TTD:D02AYX
D-03999	O=c1[nH]c2nc3ccccc3nc2c(=O)[nH]1 (IUPHAR:456)|O=c1[nH]c(=O)[nH]c2nc3c(nc12)cccc3 (TTD:D0Y5TL)	O=c1[nH]c2nc3ccccc3nc2c(=O)[nH]1	214.18	0.1596	10	IUPHAR:456|TTD:D0Y5TL	alloxazine (IUPHAR:456)				Synthetic organic (IUPHAR:456)
D-04001	c1(N2CCNC2=O)sc(cn1)[N+](=O)[O-] (KEGG:D05170)	O=C1NCCN1c1ncc(s1)N(=O)=O	214.202	1.4979	6	KEGG:D05170	Niridazole (USAN/INN) (KEGG:D05170)		61-57-4 (KEGG:D05170)	P02BX02 (KEGG:D05170)	Antischistosomal (KEGG:D05170)
D-04002	O1C2C(C(C1CC2)(C)C(=O)O)(C)C(=O)O (TTD:D0M0TM)	OC(=O)C1(C)C2CCC(C1(C)C(=O)O)O2	214.215	0.7294	10	TTD:D0M0TM
D-04005	O(c1cc(ccc1)C(=O)O)c1ccccc1 (TTD:D0DF1Z)	OC(=O)c1cccc(c1)Oc1ccccc1	214.217	3.1771	13	TTD:D0DF1Z
D-04008	o1c(Cn2[nH]c3c(c2=O)cccc3)ccc1 (TTD:D0SJ3W)	O=c1n(Cc2ccco2)[nH]c2c1cccc2	214.22	1.9709	12	TTD:D0SJ3W
D-04009	NCCCNCCSP(O)(O)=O (DrugBank:DB01143)|O.S(CCNCCCN)P(=O)(O)O.O.O (KEGG:D00226)|P(=O)(SCCNCCCN)(O)O (TTD:D06CIE)	NCCCNCCSP(=O)(O)O	214.223	0.8419	5	DrugBank:DB01143|KEGG:D00226|TTD:D06CIE	Amifostine (DrugBank:DB01143)|Amifostine (USP) (KEGG:D00226)|Amifostine (TTD:D06CIE)	Approved; Investigational (DrugBank:DB01143)	20537-88-6 (DrugBank:DB01143)|112901-68-5 (KEGG:D00226)	V03AF05 (DrugBank:DB01143)|V03AF05 (KEGG:D00226)	For reduction in the cumulative renal toxicity in patients with ovarian cancer (using cisplatin) and moderate to severe xerostomia in patients undergoing post-operative radiation treatment for head and neck cancer. (DrugBank:DB01143)|Radioprotector (topical) (KEGG:D00226)|Mucositis (TTD:D06CIE)
D-04011	S(=O)(=O)(N)c1ccc(NC(=O)C)cc1 (TTD:D04POB)	CC(=O)Nc1ccc(cc1)S(=O)(=O)N	214.242	2.1465	8	TTD:D04POB
D-04013	c1(S(=O)(=O)N=C(N)N)ccc(cc1)N (KEGG:D02437)	Nc1ccc(cc1)S(=O)(=O)N=C(N)N	214.245	2.2935	7	KEGG:D02437	Sulfaguanidine (INN) (KEGG:D02437)		57-67-0 (KEGG:D02437)	A07AB03 (KEGG:D02437)	Antibacterial, Folic acid biosynthesis inhibitor (KEGG:D02437)
D-04015	[H][C@@]1(C)NC(=O)N[C@]1([H])CCCCCC(O)=O (DrugBank:DB03775)	OC(=O)CCCCC[C@H]1NC(=O)N[C@H]1C	214.262	1.749	10	DrugBank:DB03775	D-Dethiobiotin (DrugBank:DB03775)	Experimental (DrugBank:DB03775)
D-04018	COC1=CC2=C(C=C1)C1=C(N2)C(C)=NCC1 (DrugBank:DB13875)	COc1ccc2c(c1)[nH]c1c2CCN=C1C	214.263	1.9772	13	DrugBank:DB13875	Harmaline (DrugBank:DB13875)	Experimental (DrugBank:DB13875)	304-21-2 (DrugBank:DB13875)
D-04019	O=C(N)C1c2[nH]c3c(c2CCC1)cccc3 (TTD:D0E1QP)	NC(=O)C1CCCc2c1[nH]c1c2cccc1	214.263	2.7734	13	TTD:D0E1QP
D-04022	c1cccc(c1)C(CNc1ccccn1)O.Cl (KEGG:D00755)|c1cccc(c1)C(CNc1ccccn1)O (KEGG:D07953)	OC(c1ccccc1)CNc1ccccn1	214.263	2.3001	13	KEGG:D00755|KEGG:D07953	Phenyramidol hydrochloride (USAN) (KEGG:D00755)|Fenyramidol (INN) (KEGG:D07953)		326-43-2 (KEGG:D00755)|553-69-5 (KEGG:D07953)	M03BX30 (KEGG:D00755)|M03BX30 (KEGG:D07953)	Analgesic, Skeletal muscle relaxant (KEGG:D00755)|Analgesic, Skeletal muscle relaxant (KEGG:D07953)
D-04023	c1ccc2c(c1)c(c1c(n2)CCCC1O)N.C(=O)(/C=C\C(=O)O)O (KEGG:D06288)|OC1CCCc2nc3c(c(N)c12)cccc3 (TTD:D0L8QQ)	OC1CCCc2c1c(N)c1c(n2)cccc1	214.263	2.7679	13	KEGG:D06288|TTD:D0L8QQ	Velnacrine maleate (USAN) (KEGG:D06288)		118909-22-1 (KEGG:D06288)		Nootropic, Acetylcholinesterase inhibitor (KEGG:D06288)|Cognitive disorders (TTD:D0L8QQ)
D-04026	S(=O)(=O)(N)c1ccc(SC#N)cc1 (TTD:D05PRS)	N#CSc1ccc(cc1)S(=O)(=O)N	214.265	2.68828	7	TTD:D05PRS
D-04028	S(=O)(=O)(N)c1sc2c(n1)cccc2 (TTD:D0XL5K)	NS(=O)(=O)c1nc2c(s1)cccc2	214.265	2.7248	7	TTD:D0XL5K
D-04029	S(=O)(=O)(N)c1ccc(N=C=S)cc1 (TTD:D0U1AN)	S=C=Nc1ccc(cc1)S(=O)(=O)N	214.265	2.8494	7	TTD:D0U1AN
D-04033	s1c(c(nc1C)C#Cc1cccnc1)C (TTD:D08SSG)	Cc1nc(c(s1)C)C#Cc1cccnc1	214.286	2.5547	12	TTD:D08SSG
D-04034	s1cc(c2c3c([nH]c2)cc(N)cc3)cc1 (TTD:D0V0YP)	Nc1ccc2c(c1)[nH]cc2c1cscc1	214.286	4.0598	12	TTD:D0V0YP
D-04036	N1(CCCC1)CCc1[nH]c2c(c1)cccc2 (TTD:D04LFK)	C1CCN(C1)CCc1cc2c([nH]1)cccc2	214.306	2.7441	14	TTD:D04LFK
D-04037	C1C[C@@H]2[C@H](C1)c1c3N2CCNCc3ccc1 (IUPHAR:229)|N12[C@H]3[C@H](CCC3)c3c1c(CNCC2)ccc3 (TTD:D0W6RV)	C1C[C@@H]2[C@H](C1)c1c3N2CCNCc3ccc1	214.306	2.6397	14	IUPHAR:229|TTD:D0W6RV	WAY-163909 (IUPHAR:229)|WAY-163909 (TTD:D0W6RV)				Synthetic organic (IUPHAR:229)
D-04045	c1c(ccc(c1)Cl)OC(C(=O)O)(C)C (KEGG:D07723)|Clc1ccc(OC(C)(C)C(=O)O)cc1 (TTD:D06RRD)	OC(=O)C(Oc1ccc(cc1)Cl)(C)C	214.646	2.582	10	KEGG:D07723|TTD:D06RRD	Clofibric acid (INN) (KEGG:D07723)		882-09-7 (KEGG:D07723)		Antihyperlipidemic, Triglyceride synthesis inhibitor (KEGG:D07723)|Dyslipidaemias (TTD:D06RRD)
D-04048	ClC1=C(Cl)C2=CC=CC=C2C(=O)O1 (DrugBank:DB04459)|Clc1c2c(cccc2)c(=O)oc1Cl (TTD:D0F3CA)	Clc1oc(=O)c2c(c1Cl)cccc2	215.033	3.0998	9	DrugBank:DB04459|TTD:D0F3CA	3,4-Dichloroisocoumarin (DrugBank:DB04459)	Experimental (DrugBank:DB04459)
D-04056	O=C1N(CC=C)C(=O)C(=O)c2c1cccc2 (TTD:D0B8HU)	C=CCN1C(=O)C(=O)c2c(C1=O)cccc2	215.205	0.9756	12	TTD:D0B8HU
D-04063	S(=O)(=O)(N)c1c(cccc1)C(=O)OC (TTD:D07CQI)	COC(=O)c1ccccc1S(=O)(=O)N	215.226	1.9017	8	TTD:D07CQI
D-04068	S(=O)(=O)(N)c1ccc(cc1)C(=O)NN (TTD:D0Q0EK)	NNC(=O)c1ccc(cc1)S(=O)(=O)N	215.23	1.8098	7	TTD:D0Q0EK
D-04069	S(=O)(=O)(N)c1c(cccc1)C(=O)NN (TTD:D06KTD)	NNC(=O)c1ccccc1S(=O)(=O)N	215.23	1.8098	7	TTD:D06KTD
D-04072	OC(=O)c1cc(n2c(ccc2C)C)ccc1 (TTD:D0X1JG)	OC(=O)c1cccc(c1)n1c(C)ccc1C	215.248	2.7923	13	TTD:D0X1JG
D-04076	O(c1c(Nc2ncccc2)nccc1)CC (TTD:D0Z0JU)	CCOc1cccnc1Nc1ccccn1	215.251	2.6919	12	TTD:D0Z0JU
D-04077	o1c2c(c3n(ncc3cc2)C[C@@H](N)C)cc1 (TTD:D00NST)	C[C@@H](Cn1ncc2c1c1ccoc1cc2)N	215.251	2.83	12	TTD:D00NST
D-04078	O=c1ccc2c([nH]1)c(c[nH]2)C1=CCNCC1 (IUPHAR:11)|O=c1[nH]c2c(C3=CCNCC3)c[nH]c2cc1 (TTD:D00FHZ)	O=c1ccc2c([nH]1)c(c[nH]2)C1=CCNCC1	215.251	1.5617	12	IUPHAR:11|TTD:D00FHZ	CP 93129 (IUPHAR:11)|CP 93129 (TTD:D00FHZ)				Synthetic organic (IUPHAR:11)
D-04082	s1c(nc(c1)C#Cc1cc(O)ccc1)C (TTD:D0WJ8I)	Oc1cccc(c1)C#Cc1csc(n1)C	215.271	2.5569	12	TTD:D0WJ8I
D-04086	O(C(C)(C)C)C(=O)N[C@@H](CCCC)C=O (TTD:D0T7QF)	CCCC[C@H](NC(=O)OC(C)(C)C)C=O	215.289	2.6597	11	TTD:D0T7QF
D-04088	Oc1c2c(c(NC(C)(C)C)cc1)cccc2 (TTD:D0N1ZJ)	Oc1ccc(c2c1cccc2)NC(C)(C)C	215.291	3.8288	14	TTD:D0N1ZJ
D-04089	C1CN=C(NC2=CC=CC3=C2CCCC3)N1 (DrugBank:DB13064)|Cl.C1CCc2c(C1)c(ccc2)NC1=NCCN1 (KEGG:D01347)|C1CCc2c(C1)c(ccc2)NC1=NCCN1 (KEGG:D08624)|N(c1c2CCCCc2ccc1)C1=NCCN1 (TTD:D0ZT8D)	C1CN=C(N1)Nc1cccc2c1CCCC2	215.294	1.7739	13	DrugBank:DB13064|KEGG:D01347|KEGG:D08624|TTD:D0ZT8D	Tramazoline (DrugBank:DB13064)|Tramazoline hydrochloride (JAN/USAN) (KEGG:D01347)|Tramazoline (INN) (KEGG:D08624)	Investigational (DrugBank:DB13064)	1082-57-1 (DrugBank:DB13064)|3715-90-0 (KEGG:D01347)|1082-57-1 (KEGG:D08624)	R01AA09 (DrugBank:DB13064)|R01AA09 (KEGG:D01347)|R01AA09 (KEGG:D08624)	Vasoconstrictor, alpha-Adrenergic receptor agonist (KEGG:D01347)|Vasoconstrictor, alpha-Adrenergic receptor agonist (KEGG:D08624)
D-04090	CC1N(CC2=NCCN2)Cc2c1cccc2 (IUPHAR:525)|N1(C(c2c(C1)cccc2)C)CC1=NCCN1 (TTD:D08OLL)	CC1N(CC2=NCCN2)Cc2c1cccc2	215.294	1.2672	13	IUPHAR:525|TTD:D08OLL	BRL 44408 (IUPHAR:525)				Synthetic organic (IUPHAR:525)
D-04091	N(CCc1[nH]cnc1)c1cc(c(cc1)C)C (TTD:D0B5SF)	Cc1ccc(cc1C)NCCc1cnc[nH]1	215.294	2.7541	13	TTD:D0B5SF
D-04102	O=N[Fe--](C#N)(C#N)(C#N)(C#N)C#N (DrugBank:DB00325)|[Fe-2](C#N)(C#N)(C#N)(C#N)(C#N)N=O.O.O.[Na+].[Na+] (KEGG:D00614)	O=N[Fe-2](C#N)(C#N)(C#N)(C#N)C#N	215.938	0.2985	5	DrugBank:DB00325|KEGG:D00614	Nitroprusside (DrugBank:DB00325)|Sodium nitroprusside (USP) (KEGG:D00614)	Approved; Investigational (DrugBank:DB00325)	15078-28-1 (DrugBank:DB00325)|13755-38-9 (KEGG:D00614)	C02DD01 (DrugBank:DB00325)|C02DD01 (KEGG:D00614)	For immediate reduction of blood pressure of patients in hypertensive crises, reduce bleeding during surgery, and for the treatment of acute congestive heart failure (DrugBank:DB00325)|Antihypertensive, Vascular smooth muscle relaxant (KEGG:D00614)
D-04103	Clc1c2NC(=O)C(=O)c2cc(Cl)c1 (TTD:D0NJ4G)	Clc1cc(Cl)c2c(c1)C(=O)C(=O)N2	216.021	2.2662	8	TTD:D0NJ4G
D-04104	Clc1c2c(NC(=O)C2=O)cc(Cl)c1 (TTD:D04EXR)	Clc1cc2NC(=O)C(=O)c2c(c1)Cl	216.021	2.2662	8	TTD:D04EXR
D-04105	Clc1c2c(NC(=O)C2=O)c(Cl)cc1 (TTD:D0EK7H)	Clc1ccc(c2c1C(=O)C(=O)N2)Cl	216.021	2.2662	8	TTD:D0EK7H
D-04106	Clc1c2NC(=O)C(=O)c2ccc1Cl (TTD:D0Z8HX)	O=C1C(=O)Nc2c1ccc(c2Cl)Cl	216.021	2.2662	8	TTD:D0Z8HX
D-04107	Clc1c2c(NC(=O)C2=O)ccc1Cl (TTD:D0Z6CZ)	O=C1Nc2c(C1=O)c(Cl)c(cc2)Cl	216.021	2.2662	8	TTD:D0Z6CZ
D-04111	[H][C@@](O)(COP(O)(O)=O)[C@@]([H])(O)C(O)=O (DrugBank:DB03108)|P(=O)(OC[C@@H](O)[C@@H](O)C(=O)O)(O)O (TTD:D0C4VG)	O[C@@H]([C@H](C(=O)O)O)COP(=O)(O)O	216.083	-2.0979	4	DrugBank:DB03108|TTD:D0C4VG	4-phospho-D-erythronic acid (DrugBank:DB03108)	Experimental (DrugBank:DB03108)
D-04113	Clc1c2CCNCCc2ccc1Cl (TTD:D0T7RY)	Clc1ccc2c(c1Cl)CCNCC2	216.107	3.0104	10	TTD:D0T7RY
D-04114	ClC1=CC=C2CCCNCC2=C1Cl (DrugBank:DB04273)|Clc1ccc2c(c1Cl)CNCCC2 (IUPHAR:6631)|Clc1c2c(CCCNC2)ccc1Cl (TTD:D05ZKW)	Clc1ccc2c(c1Cl)CNCCC2	216.107	3.358	10	DrugBank:DB04273|IUPHAR:6631|TTD:D05ZKW	8,9-Dichloro-2,3,4,5-Tetrahydro-1h-Benzo[C]Azepine (DrugBank:DB04273)|LY134046 (IUPHAR:6631)|LY134046 (TTD:D05ZKW)	Experimental (DrugBank:DB04273)			Synthetic organic (IUPHAR:6631)
D-04117	COC1=C2C=CC(=O)OC2=CC2=C1C=CO2 (DrugBank:DB12216)|c1(=O)ccc2c(o1)cc1c(c2OC)cco1 (KEGG:D07521)|c12c(oc(=O)cc2)cc2c(c1OC)cco2 (TTD:D0QR5G)	COc1c2ccc(=O)oc2cc2c1cco2	216.19	2.5478	12	DrugBank:DB12216|KEGG:D07521|TTD:D0QR5G	Bergapten (DrugBank:DB12216)|Bergaptene (DCF) (KEGG:D07521)|5-methoxypsoralen (TTD:D0QR5G)	Investigational (DrugBank:DB12216)	484-20-8 (DrugBank:DB12216)|484-20-8 (KEGG:D07521)	D05BA03 (DrugBank:DB12216)|D05BA03 (KEGG:D07521)	Pigmentation agent (KEGG:D07521)|Psoriasis (TTD:D0QR5G)
D-04118	COC1=C2OC(=O)C=CC2=CC2=C1OC=C2 (DrugBank:DB00553)|c1(=O)ccc2c(o1)c(c1c(c2)cco1)OC (KEGG:D00139)|o1c2c(cc3c(oc(=O)cc3)c2OC)cc1 (TTD:D08SKH)	COc1c2oc(=O)ccc2cc2c1occ2	216.19	2.5478	12	DrugBank:DB00553|KEGG:D00139|TTD:D08SKH	Methoxsalen (DrugBank:DB00553)|Methoxsalen (JP17/USP) (KEGG:D00139)|Methoxsalen (TTD:D08SKH)	Approved (DrugBank:DB00553)	298-81-7 (DrugBank:DB00553)|298-81-7 (KEGG:D00139)	D05AD02; D05BA02 (DrugBank:DB00553)|D05AD02; D05BA02 (KEGG:D00139)	For the treatment of psoriasis and vitiligo (DrugBank:DB00553)|Antivitiligo, Pigmentation agent (KEGG:D00139)|Cutaneous T-cell lymphoma; Psoriasis (TTD:D08SKH)
D-04122	n1(c2ncnc(N)c2nc1n1nccn1)C (TTD:D02BGA)	Nc1ncnc2c1nc(n2C)n1nccn1	216.203	0.1074	8	TTD:D02BGA
D-04123	OC(=O)C1=CC=C(C=C1)C1=CC=C(F)C=C1 (DrugBank:DB07108)|Fc1ccc(c2ccc(cc2)C(=O)O)cc1 (TTD:D0T3VP)	Fc1ccc(cc1)c1ccc(cc1)C(=O)O	216.208	3.1909	13	DrugBank:DB07108|TTD:D0T3VP	4'-FLUORO-1,1'-BIPHENYL-4-CARBOXYLIC ACID (DrugBank:DB07108)	Experimental (DrugBank:DB07108)
D-04128	[H][C@]1(O)[C@]([H])(O)[C@@]2([H])N=C(O[C@@]2([H])[C@]1([H])CO)N(C)C (DrugBank:DB04404)	OC[C@@H]1[C@@H](O)[C@@H]([C@@H]2[C@H]1OC(=N2)N(C)C)O	216.234	-2.5491	9	DrugBank:DB04404	Allosamizoline (DrugBank:DB04404)	Experimental (DrugBank:DB04404)
D-04132	C([3H])(Oc1cncc(c1)C#Cc1ccccn1)([3H])[3H] (IUPHAR:6425)|O(c1cc(cnc1)C#Cc1ncccc1)C([3H])([3H])[3H] (TTD:D0L5FW)	C([3H])(Oc1cncc(c1)C#Cc1ccccn1)([3H])[3H]	216.256	1.885	13	IUPHAR:6425|TTD:D0L5FW	[<sup>3</sup>H]methoxy-PEPy (IUPHAR:6425)	Labelled; Radioactive (IUPHAR:6425)			Synthetic organic (IUPHAR:6425)
D-04135	C(CCc1cnc[nH]1)OCc1ccccc1 (IUPHAR:1255)|O(CCCc1[nH]cnc1)Cc1ccccc1 (TTD:D00HWF)	C(CCc1cnc[nH]1)OCc1ccccc1	216.279	2.5591	13	IUPHAR:1255|TTD:D00HWF	proxyfan (IUPHAR:1255)				Synthetic organic (IUPHAR:1255)
D-04136	[H]N1CCN=C1COC1=CC=CC=C1C1CC1 (DrugBank:DB09202)|C1CN=C(N1)COc1ccccc1C1CC1 (IUPHAR:515)|O(c1c(C2CC2)cccc1)CC1=NCCN1 (TTD:D06QKW)	C1CN=C(N1)COc1ccccc1C1CC1	216.279	1.7089	13	DrugBank:DB09202|IUPHAR:515|TTD:D06QKW	Cirazoline (DrugBank:DB09202)|cirazoline (IUPHAR:515)	Experimental (DrugBank:DB09202)	59939-16-1 (DrugBank:DB09202)		Synthetic organic (IUPHAR:515)
D-04137	O(C(CC)C)c1c2nc(N)ccc2ccc1 (TTD:D01OYC)	CCC(Oc1cccc2c1nc(N)cc2)C	216.279	3.5755	13	TTD:D01OYC
D-04138	O(CCCC)c1ccc(n2ccnc2)cc1 (TTD:D07VHB)	CCCCOc1ccc(cc1)n1cncc1	216.279	3.0512	13	TTD:D07VHB
D-04139	O(CCCC)c1c2nc(N)ccc2ccc1 (TTD:D03SEC)	CCCCOc1cccc2c1nc(N)cc2	216.279	3.5771	13	TTD:D03SEC
D-04141	O(c1cc2c3c([nH]c2cc1)C(NCC3)C)C (TTD:D07RIQ)	COc1ccc2c(c1)c1CCNC(c1[nH]2)C	216.279	2.712	13	TTD:D07RIQ
D-04143	OCCCc1n(Cc2ccccc2)cnc1 (TTD:D0D8KN)	OCCCc1cncn1Cc1ccccc1	216.279	1.8563	13	TTD:D0D8KN
D-04144	C1C2=C(O[C@]11CN3CCC1CC3)N=CC=C2 (DrugBank:DB12145)|c1cnc2c(c1)C[C@]1(O2)CN2CCC1CC2 (IUPHAR:7697)|O1[C@@]2(C3CCN(C2)CC3)Cc2c1nccc2 (TTD:D0Q9RR)	c1cnc2c(c1)C[C@]1(O2)CN2CCC1CC2	216.279	1.4188	13	DrugBank:DB12145|IUPHAR:7697|TTD:D0Q9RR	AZD-0328 (DrugBank:DB12145)|AZD0328 (IUPHAR:7697)|AZD0328 (TTD:D0Q9RR)	Investigational (DrugBank:DB12145)	220099-91-2 (DrugBank:DB12145)		Synthetic organic (IUPHAR:7697)|Alzheimer disease (TTD:D0Q9RR)
D-04146	C1C[C@@]23C[N@@]1CC[C@@H]2OC1=C(C3)N=CC=C1 (DrugBank:DB12125)	c1cnc2c(c1)O[C@@H]1[C@@]3(C2)CCN(C3)CC1	216.279	1.4188	13	DrugBank:DB12125	Dianicline (DrugBank:DB12125)	Investigational (DrugBank:DB12125)	292634-27-6 (DrugBank:DB12125)
D-04148	CCCNC(=N)NCCC[C@@H](C(=O)O)N (IUPHAR:6525)	CCCNC(=N)NCCC[C@@H](C(=O)O)N	216.281	1.2843	9	IUPHAR:6525	N<sup>&omega;</sup>propyl-L-arginine (IUPHAR:6525)				Metabolite (IUPHAR:6525)
D-04149	O(C(C)(C)C)C(=O)N[C@@H](CC(C)C)[13CH]=O (TTD:D00QIA)	O=[13CH][C@@H](NC(=O)OC(C)(C)C)CC(C)C	216.282	2.5156	11	TTD:D00QIA
D-04153	CCCCCCCCCCC(C(=O)O)O (IUPHAR:5849)|OC(CCCCCCCCCC)C(=O)O (TTD:D0T4BP)	CCCCCCCCCCC(C(=O)O)O	216.317	2.9627	12	IUPHAR:5849|TTD:D0T4BP	2-hydroxylauric acid (IUPHAR:5849)|2-hydroxylauric acid (TTD:D0T4BP)				Metabolite (IUPHAR:5849)
D-04156	CCCCCCC1=CC=C(C=C1)C(=O)C=C (DrugBank:DB08085)|O=C(c1ccc(CCCCCC)cc1)C=C (TTD:D0YU9Z)	CCCCCCc1ccc(cc1)C(=O)C=C	216.319	4.1781	15	DrugBank:DB08085|TTD:D0YU9Z	1-(4-HEXYLPHENYL)PROP-2-EN-1-ONE (DrugBank:DB08085)	Experimental (DrugBank:DB08085)
D-04158	CC(CCC#C[C@@H]1C[C@H]1c1[nH]cnc1)(C)C (IUPHAR:1244)|[C@@H]1([C@@H](C1)C#CCCC(C)(C)C)c1cnc[nH]1.C(=C\C(=O)O)\C(=O)O (KEGG:D03518)|[nH]1c([C@H]2[C@@H](C2)C#CCCC(C)(C)C)cnc1 (TTD:D0Q5YF)	CC(CCC#C[C@@H]1C[C@H]1c1[nH]cnc1)(C)C	216.322	3.3429	14	IUPHAR:1244|KEGG:D03518|TTD:D0Q5YF	cipralisant (IUPHAR:1244)|Cipralisant maleate (USAN) (KEGG:D03518)|Cipralisant (TTD:D0Q5YF)		223420-20-0 (KEGG:D03518)		Synthetic organic (IUPHAR:1244)|Nootropic, H3 receptor antagonist (KEGG:D03518)|Attention deficit hyperactivity disorder (TTD:D0Q5YF)
D-04160	CCN(CC)CCC1=CNC2=CC=CC=C12 (DrugBank:DB01460)|N(CCc1c2c([nH]c1)cccc2)(CC)CC (TTD:D0W2HW)	CCN(CCc1c[nH]c2c1cccc2)CC	216.322	3.0522	14	DrugBank:DB01460|TTD:D0W2HW	Diethyltryptamine (DrugBank:DB01460)	Experimental; Illicit (DrugBank:DB01460)	61-51-8 (DrugBank:DB01460)
D-04161	[nH]1c2c(c(CCN(C)C)c1)cc(cc2)CC (TTD:D03XAE)	CCc1ccc2c(c1)c(CCN(C)C)c[nH]2	216.322	2.8344	14	TTD:D03XAE
D-04162	N1CCC(CC1)N[C@@H]1C[C@H]1c1ccccc1 (IUPHAR:8241)|N([C@H]1[C@@H](C1)c1ccccc1)C1CCNCC1 (TTD:D0EV7U)	N1CCC(CC1)N[C@@H]1C[C@H]1c1ccccc1	216.322	2.6038	14	IUPHAR:8241|TTD:D0EV7U	GSK-LSD1 (IUPHAR:8241)				Synthetic organic (IUPHAR:8241)
D-04163	Clc1[nH]c(=O)[nH]c(=O)c1CCCCC (TTD:D0E7SH)	CCCCCc1c(Cl)[nH]c(=O)[nH]c1=O	216.665	1.4493	9	TTD:D0E7SH
D-04168	O=C1C[C@@]([C@H]2[C@@H]1[C@]2(F)C(=O)O)(N)C(=O)O (IUPHAR:1395)|F[C@]1([C@@H]2[C@H]1C(=O)C[C@@]2(N)C(=O)O)C(=O)O (TTD:D06SDD)	O=C1C[C@@]([C@H]2[C@@H]1[C@]2(F)C(=O)O)(N)C(=O)O	217.151	-0.5195	8	IUPHAR:1395|TTD:D06SDD	MGS0028 (IUPHAR:1395)|MGS0028 (TTD:D06SDD)				Synthetic organic (IUPHAR:1395)
D-04169	N[C@@H](CN1C=C(F)C(=O)NC1=O)C(O)=O (DrugBank:DB02966)|OC(=O)[C@H](Cn1cc(F)c(=O)[nH]c1=O)N (IUPHAR:4070)|Fc1cn(C[C@H](N)C(=O)O)c(=O)[nH]c1=O (TTD:D09LXQ)	OC(=O)[C@H](Cn1cc(F)c(=O)[nH]c1=O)N	217.155	-1.2121	7	DrugBank:DB02966|IUPHAR:4070|TTD:D09LXQ	Fluoro-Willardiine (DrugBank:DB02966)|(<i>S</i>)-5-fluorowillardiine (IUPHAR:4070)	Experimental (DrugBank:DB02966)			Synthetic organic (IUPHAR:4070)
D-04170	OC(=O)C1(N)C[C@H]([C@H](C1)C(=O)O)C(=O)O (TTD:D0W3PY)	OC(=O)[C@@H]1CC(C[C@@H]1C(=O)O)(N)C(=O)O	217.176	-0.3358	8	TTD:D0W3PY	ACPT-I (TTD:D0W3PY)
D-04171	OC(=O)[C@@H]1C[C@](C[C@@H]1C(=O)O)(N)C(=O)O (IUPHAR:1408)	OC(=O)[C@@H]1C[C@](C[C@@H]1C(=O)O)(N)C(=O)O	217.176	-0.3358	8	IUPHAR:1408	ACPT-I (IUPHAR:1408)				Synthetic organic (IUPHAR:1408)
D-04173	O=C(n1nc([N+](=O)[O-])cc1)c1ccccc1 (TTD:D08WQJ)	O=N(=O)c1ccn(n1)C(=O)c1ccccc1	217.181	2.003	10	TTD:D08WQJ
D-04174	O=C(n1ncc([N+](=O)[O-])c1)c1ccccc1 (TTD:D06LPR)	O=N(=O)c1cnn(c1)C(=O)c1ccccc1	217.181	2.003	10	TTD:D06LPR
D-04176	S(=O)(=O)(Nc1ccc([N+](=O)[O-])cc1)N (TTD:D0I8DW)	O=N(=O)c1ccc(cc1)NS(=O)(=O)N	217.202	2.5875	6	TTD:D0I8DW
D-04177	FC(F)c1cc2[nH]c3c(c2cc1)cccc3 (TTD:D02HMN)	FC(c1ccc2c(c1)[nH]c1c2cccc1)F	217.214	4.2587	13	TTD:D02HMN
D-04179	O=C(N1c2c(C(=O)C1=O)cccc2)CCC (TTD:D0M5NR)	CCCC(=O)N1c2ccccc2C(=O)C1=O	217.221	1.6076	12	TTD:D0M5NR
D-04185	o1c2c(CCCNC2=O)c2c1ccc(O)c2 (TTD:D0MC3K)	Oc1cc2c3CCCNC(=O)c3oc2cc1	217.221	2.1432	12	TTD:D0MC3K					Cancer (TTD:D0MC3K)
D-04193	[O-][N+](=O)c1ccc(CCn2ccnc2)cc1 (TTD:D0M0FE)	O=N(=O)c1ccc(cc1)CCn1cncc1	217.224	2.5572	11	TTD:D0M0FE
D-04196	s1[nH]c(=O)c(c1Nc1ccccc1)C#N (TTD:D0T0VC)	N#Cc1c(s[nH]c1=O)Nc1ccccc1	217.247	2.12468	10	TTD:D0T0VC
D-04197	s1c2c(nc(nc2cc1)N)c1occc1 (TTD:D0QN5I)	Nc1nc2ccsc2c(n1)c1ccco1	217.247	3.1147	10	TTD:D0QN5I
D-04199	s1c(nc(c1)C#Cc1c(F)cccc1)C (TTD:D0Z1PY)	Cc1scc(n1)C#Cc1ccccc1F	217.262	2.9904	12	TTD:D0Z1PY
D-04200	s1c(nc(c1)C#Cc1ccc(F)cc1)C (TTD:D0P2DV)	Fc1ccc(cc1)C#Cc1csc(n1)C	217.262	2.9904	12	TTD:D0P2DV
D-04201	s1c(nc(c1)C#Cc1cc(F)ccc1)C (TTD:D0I9NE)	Fc1cccc(c1)C#Cc1csc(n1)C	217.262	2.9904	12	TTD:D0I9NE
D-04202	O=C1N(C(=O)C1(CC)CC)c1ccccc1 (TTD:D0H8EO)	CCC1(CC)C(=O)N(C1=O)c1ccccc1	217.264	2.4312	13	TTD:D0H8EO
D-04208	[nH]1c2c(c3c1cccc3)ccc1c2cccc1 (TTD:D09DGA)	c1ccc2c(c1)c1[nH]c3c(c1cc2)cccc3	217.265	4.4743	16	TTD:D09DGA
D-04211	N(C1CCCC1)c1ncnc2n(cnc12)C (TTD:D01EHP)	Cn1cnc2c1ncnc2NC1CCCC1	217.27	1.7908	11	TTD:D01EHP
D-04213	C[C@H](CS)C(=O)N1CCC[C@H]1C(O)=O (DrugBank:DB01197)|SC[C@H](C(=O)N1CCC[C@H]1C(=O)O)C (IUPHAR:5158)|C1CC[C@H](N1C(=O)[C@@H](CS)C)C(=O)O (KEGG:D00251)|SC[C@H](C(=O)N1[C@@H](CCC1)C(=O)O)C (TTD:D0I0EG)	SC[C@H](C(=O)N1CCC[C@H]1C(=O)O)C	217.285	0.5658	9	DrugBank:DB01197|IUPHAR:5158|KEGG:D00251|TTD:D0I0EG	Captopril (DrugBank:DB01197)|captopril (IUPHAR:5158)|Captopril (JP17/USP/INN) (KEGG:D00251)|Captopril (TTD:D0I0EG)	Approved (DrugBank:DB01197)|Approved (IUPHAR:5158)	62571-86-2 (DrugBank:DB01197)|62571-86-2 (KEGG:D00251)	C09AA01; C09BA01 (DrugBank:DB01197)|C09AA01 (KEGG:D00251)	For the treatment of essential or renovascular hypertension (usually administered with other drugs, particularly thiazide diuretics). May be used to treat congestive heart failure in combination with other drugs (e.g. cardiac glycosides, diuretics, &beta;-adrenergic blockers). May improve survival in patients with left ventricular dysfunction following myocardial infarction. May be used to treat …
D-04215	O[C@H]1[C@H](NC[C@@H](O)[C@@H]1O)CCCCCC (TTD:D0R4JZ)	CCCCCC[C@H]1NC[C@H]([C@@H]([C@H]1O)O)O	217.305	0.3401	11	TTD:D0R4JZ
D-04217	O=C(C(C1NCCCC1)c1ccccc1)C (TTD:D08JCK)	CC(=O)C(c1ccccc1)C1CCCCN1	217.307	2.8301	14	TTD:D08JCK
D-04222	N1(CCNCC1)c1nc2CCCCc2cc1 (TTD:D0A6LB)	N1CCN(CC1)c1ccc2c(n1)CCCC2	217.31	1.7638	13	TTD:D0A6LB
D-04223	s1c(C2(N)CCCC2)cc2c1cccc2 (TTD:D02EHL)	NC1(CCCC1)c1cc2c(s1)cccc2	217.33	4.3296	13	TTD:D02EHL
D-04225	N1(CCCC1)CCc1c(cc(cc1C)C)C (TTD:D00SHX)	Cc1cc(C)cc(c1CCN1CCCC1)C	217.35	3.188	15	TTD:D00SHX
D-04227	Clc1c(c2c(CN)cccc2)cccc1 (TTD:D06NRU)	NCc1ccccc1c1ccccc1Cl	217.694	4.166	13	TTD:D06NRU
D-04232	N12CN3CN(C1)CN(C2)C3.c1c(cc(c(c1)O)C(=O)O)S(=O)(=O)O (KEGG:D08199)	OC(=O)c1cc(ccc1O)S(=O)(=O)O	218.184	1.4179	7	KEGG:D08199	Methenamine sulfosalicylate (KEGG:D08199)			J01XX05 (KEGG:D08199)	Antibacterial, Antiseptic (KEGG:D08199)
D-04236	o1c2c(C(=O)CC)c(O)ccc2ccc1=O (TTD:D0EH0S)	CCC(=O)c1c(O)ccc2c1oc(=O)cc2	218.205	2.0913	12	TTD:D0EH0S
D-04237	o1c2c(cc(c(O)c2)C(=O)CC)ccc1=O (TTD:D0EY2F)	CCC(=O)c1cc2ccc(=O)oc2cc1O	218.205	2.0913	12	TTD:D0EY2F
D-04238	o1c2c(cc(c(OC)c2)C(=O)C)ccc1=O (TTD:D05VUA)	COc1cc2oc(=O)ccc2cc1C(=O)C	218.205	2.0042	12	TTD:D05VUA
D-04239	o1c2c(c(OC)ccc2ccc1=O)C(=O)C (TTD:D0F7KC)	COc1ccc2c(c1C(=O)C)oc(=O)cc2	218.205	2.0042	12	TTD:D0F7KC
D-04243	OC(=O)C1=CC(=O)C(O1)(C)c1ccccc1 (IUPHAR:1595)|C1(C(=O)C=C(O1)C(=O)O)(C)c1ccccc1 (KEGG:D02753)|O1C(c2ccccc2)(C(=O)C=C1C(=O)O)C (TTD:D0K1HO)	OC(=O)C1=CC(=O)C(O1)(C)c1ccccc1	218.205	1.4696	12	IUPHAR:1595|KEGG:D02753|TTD:D0K1HO	acifran (IUPHAR:1595)|Acifran (USAN/INN) (KEGG:D02753)|Acifran (TTD:D0K1HO)		72420-38-3 (KEGG:D02753)		Synthetic organic (IUPHAR:1595)|Antidyslipidemia (hyperlipoproteinemic) (KEGG:D02753)|Atherosclerosis (TTD:D0K1HO)
D-04247	NC1=C(\N=N\C2=CC=C(O)C=C2)C(N)=NN1 (DrugBank:DB07731)	Oc1ccc(cc1)/N=N/c1c(N)n[nH]c1N	218.215	2.8575	9	DrugBank:DB07731	4-[(E)-(3,5-DIAMINO-1H-PYRAZOL-4-YL)DIAZENYL]PHENOL (DrugBank:DB07731)	Experimental (DrugBank:DB07731)
D-04251	O(CCCC)c1cc2oc(=O)ccc2cc1 (TTD:D0LU4S)	CCCCOc1ccc2c(c1)oc(=O)cc2	218.248	2.9719	13	TTD:D0LU4S
D-04252	O(C(C)(C)C#C)C(=O)c1ccc(OC)cc1 (TTD:D0E0EQ)	COc1ccc(cc1)C(=O)OC(C#C)(C)C	218.248	2.2638	13	TTD:D0E0EQ
D-04256	s1cc(nc1N)C#Cc1cc(F)ccc1 (TTD:D0ST3S)	Fc1cccc(c1)C#Cc1csc(n1)N	218.25	2.8454	11	TTD:D0ST3S
D-04259	o1c2c(CCCNC(=O)C)cccc2nc1 (TTD:D0L9YA)	CC(=O)NCCCc1cccc2c1ocn2	218.252	2.2874	12	TTD:D0L9YA
D-04260	CC(=O)NCCC1=CNC2=C1C=C(O)C=C2 (DrugBank:DB04275)|CC(=O)NCCc1c[nH]c2c1cc(O)cc2 (IUPHAR:5451)|Oc1cc2c(CCNC(=O)C)c[nH]c2cc1 (TTD:D00PDI)|Oc1cc2c(CCNC(=O)C)c[nH]c2cc1 (TTD:D0F9ZW)	CC(=O)NCCc1c[nH]c2c1cc(O)cc2	218.252	1.943	12	DrugBank:DB04275|IUPHAR:5451|TTD:D00PDI|TTD:D0F9ZW	N-acetylserotonin (DrugBank:DB04275)|N-acetylserotonin (IUPHAR:5451)|N-acetylserotonin (TTD:D0F9ZW)	Experimental (DrugBank:DB04275)	1210-83-9 (DrugBank:DB04275)		Metabolite (IUPHAR:5451)
D-04263	O=C1NC(=O)CC1(CC)c1ccc(N)cc1 (TTD:D0Z1OI)	CCC1(CC(=O)NC1=O)c1ccc(cc1)N	218.252	1.8731	12	TTD:D0Z1OI
D-04264	O=C1N(C(=O)C1(CC)CC)c1cccnc1 (TTD:D0A5ZF)	CCC1(CC)C(=O)N(C1=O)c1cccnc1	218.252	1.8262	12	TTD:D0A5ZF
D-04265	c1nccc(c1)C1(C(=O)NC(=O)CC1)CC (KEGG:D05746)|O=C1NC(=O)CCC1(CC)c1ccncc1 (TTD:D06JUR)	CCC1(CCC(=O)NC1=O)c1ccncc1	218.252	1.4948	12	KEGG:D05746|TTD:D06JUR	Rogletimide (USAN/INN) (KEGG:D05746)		121840-95-7 (KEGG:D05746)		Antineoplastic, Estrogen biosynthesis inhibitor (KEGG:D05746)|Breast cancer (TTD:D06JUR)
D-04274	o1c2ncnc(N3CCNCC3)c2cc1C (TTD:D05RKH)	Cc1oc2c(c1)c(ncn2)N1CCNCC1	218.255	1.3346	11	TTD:D05RKH
D-04277	Fc1cc2CC(CC3NC=NC3)Cc2cc1 (TTD:D0FU5E)	Fc1ccc2c(c1)CC(C2)CC1CN=CN1	218.27	1.6951	13	TTD:D0FU5E
D-04280	s1c(NC(=O)c2ccccc2)nc(c1)C (TTD:D01IMJ)	Cc1csc(n1)NC(=O)c1ccccc1	218.275	2.7768	11	TTD:D01IMJ
D-04281	s1c(c2ccccc2)cc(c1N)C(=O)N (TTD:D06CBR)	NC(=O)c1cc(sc1N)c1ccccc1	218.275	3.3777	11	TTD:D06CBR
D-04285	O1[C@@H]2[C@@H]3[C@H](CCC[C@H]2C(=C)C1=O)CC=C3C (TTD:D0C3XU)	CC1=CC[C@@H]2[C@H]1[C@H]1OC(=O)C(=C)[C@@H]1CCC2	218.292	2.8505	14	TTD:D0C3XU
D-04287	c1(ccccc1OCC1=NCCN1)C(C)C (KEGG:D07372)	CC(c1ccccc1OCC1=NCCN1)C	218.295	1.9549	13	KEGG:D07372	Fenoxazoline (INN) (KEGG:D07372)		4846-91-7 (KEGG:D07372)	R01AA12 (KEGG:D07372)	Vasoconstrictor (KEGG:D07372)
D-04288	Oc1c2c(CC(N(C)C)C)c[nH]c2ccc1 (TTD:D08GJS)	CN(C(Cc1c[nH]c2c1c(O)ccc2)C)C	218.295	2.3661	13	TTD:D08GJS
D-04289	Oc1c2c(CCCN(C)C)c[nH]c2ccc1 (TTD:D0W8EB)	CN(CCCc1c[nH]c2c1c(O)ccc2)C	218.295	2.3677	13	TTD:D0W8EB
D-04290	Oc1c2c(CCN(C)C)c([nH]c2ccc1)C (TTD:D00OCV)	CN(CCc1c(C)[nH]c2c1c(O)ccc2)C	218.295	2.286	13	TTD:D00OCV
D-04291	Oc1c2c(CCN(C)C)cn(c2ccc1)C (TTD:D0R8VT)	CN(CCc1cn(c2c1c(O)ccc2)C)C	218.295	1.988	13	TTD:D0R8VT
D-04292	Oc1cc2[C@]3([C@H](N(CC3)C)N(c2cc1)C)C (TTD:D0D9RL)	CN1CC[C@@]2([C@H]1N(C)c1c2cc(cc1)O)C	218.295	1.7642	13	TTD:D0D9RL
D-04293	COC1=CC=C2NC=C(CCN(C)C)C2=C1 (DrugBank:DB14010)|COc1ccc2c(c1)c(CCN(C)C)c[nH]2 (IUPHAR:145)|O(c1cc2c(CCN(C)C)c[nH]c2cc1)C (TTD:D0C5XQ)	COc1ccc2c(c1)c(CCN(C)C)c[nH]2	218.295	2.2806	13	DrugBank:DB14010|IUPHAR:145|TTD:D0C5XQ	5-methoxy-N,N-dimethyltryptamine (DrugBank:DB14010)|5-MeO-DMT (IUPHAR:145)	Experimental; Illicit (DrugBank:DB14010)	1019-45-0 (DrugBank:DB14010)		Synthetic organic (IUPHAR:145)
D-04294	O(c1cc2n(CCN(C)C)ccc2cc1)C (TTD:D0U5HQ)	COc1ccc2c(c1)n(CCN(C)C)cc2	218.295	2.2115	13	TTD:D0U5HQ
D-04296	O1c2c(c3N(CCc3cc2)C[C@@H](N)C)CC1 (TTD:D0E6NW)	C[C@@H](CN1CCc2c1c1CCOc1cc2)N	218.295	2.0965	13	TTD:D0E6NW
D-04299	O=C(NC1CCCCC1)Nc1ccccc1 (TTD:D0C5GW)	O=C(Nc1ccccc1)NC1CCCCC1	218.295	3.6047	13	TTD:D0C5GW
D-04307	Clc1c(c2ncccc2CN)cccc1 (TTD:D00HSG)	NCc1cccnc1c1ccccc1Cl	218.682	3.561	12	TTD:D00HSG
D-04309	OP(O)(=O)OC1=CC=C(C=C1)[N+]([O-])=O (DrugBank:DB04214)|P(=O)(Oc1ccc([N+](=O)[O-])cc1)(O)O (TTD:D0T0YI)	O=N(=O)c1ccc(cc1)OP(=O)(O)O	219.089	1.5895	6	DrugBank:DB04214|TTD:D0T0YI	4-Nitrophenyl Phosphate (DrugBank:DB04214)	Experimental (DrugBank:DB04214)	330-13-2 (DrugBank:DB04214)
D-04312	OC(=O)C(CCC(=O)NO)CCC(=O)O (TTD:D05SNS)	ONC(=O)CCC(C(=O)O)CCC(=O)O	219.192	0.2285	8	TTD:D05SNS
D-04317	N[C@@H](CCCNC(=N)N[N+]([O-])=O)C(O)=O (DrugBank:DB04223)	N=C(NN(=O)=O)NCCC[C@@H](C(=O)O)N	219.199	0.5892	6	DrugBank:DB04223	Nitroarginine (DrugBank:DB04223)	Experimental; Investigational (DrugBank:DB04223)	2149-70-4 (DrugBank:DB04223)
D-04320	[O-][N+](=O)NC(=NCCC[C@@H](C(=O)O)N)N (IUPHAR:8759)	O=N(=O)NC(=NCCC[C@@H](C(=O)O)N)N	219.199	0.5892	6	IUPHAR:8759	L-NNA (IUPHAR:8759)				Synthetic organic (IUPHAR:8759)
D-04321	OC(=O)[C@@H](N)CCCN([N+](=O)[O-])C(=N)N (TTD:D03FJM)	OC(=O)[C@H](CCCN(N(=O)=O)C(=N)N)N	219.199	0.5892	6	TTD:D03FJM
D-04322	Fc1c(n2c(CC(=O)O)ccc2)cccc1 (TTD:D07STC)	OC(=O)Cc1cccn1c1ccccc1F	219.212	2.2435	12	TTD:D07STC
D-04323	Fc1c(n2cc(cc2)CC(=O)O)cccc1 (TTD:D02FGY)	OC(=O)Cc1ccn(c1)c1ccccc1F	219.212	2.2435	12	TTD:D02FGY
D-04328	O(c1c2[nH]c(=O)cc(c2cc(OC)c1)C)C (TTD:D08ISK)	COc1cc(OC)cc2c1[nH]c(=O)cc2C	219.237	1.8537	12	TTD:D08ISK
D-04330	COC1=CC=C(C=C1)C(=O)N1CCCC1=O (DrugBank:DB04599)|COc1ccc(cc1)C(=O)N1CCCC1=O (IUPHAR:4133)|c1c(ccc(c1)C(=O)N1CCCC1=O)OC (KEGG:D01883)|O=C1N(CCC1)C(=O)c1ccc(OC)cc1 (TTD:D02DPU)	COc1ccc(cc1)C(=O)N1CCCC1=O	219.237	1.3957	12	DrugBank:DB04599|IUPHAR:4133|KEGG:D01883|TTD:D02DPU	Aniracetam (DrugBank:DB04599)|aniracetam (IUPHAR:4133)|Aniracetam (JAN/USAN/INN) (KEGG:D01883)	Experimental (DrugBank:DB04599)|Approved (IUPHAR:4133)	72432-10-1 (DrugBank:DB04599)|72432-10-1 (KEGG:D01883)	N06BX11 (DrugBank:DB04599)|N06BX11 (KEGG:D01883)	Synthetic organic (IUPHAR:4133)|Nootropic (KEGG:D01883)|Cerebrovascular ischaemia (TTD:D02DPU)
D-04336	C\C(CO)=C/CNC1=C2N=CNC2=NC=N1 (DrugBank:DB11337)	C/C(=C\CNc1ncnc2c1nc[nH]2)/CO	219.243	0.7764	10	DrugBank:DB11337	Zeatin (DrugBank:DB11337)	Experimental (DrugBank:DB11337)	1637-39-4 (DrugBank:DB11337)
D-04338	[H][C@]12O[C@]([H])(CO)[C@@]([H])(O)[C@]([H])(O)[C@@]1([H])N=C(C)S2 (DrugBank:DB03747)	OC[C@H]1O[C@@H]2SC(=N[C@@H]2[C@H]([C@@H]1O)O)C	219.258	-1.6052	8	DrugBank:DB03747	3ar,5r,6s,7r,7ar-5-Hydroxymethyl-2-Methyl-5,6,7,7a-Tetrahydro-3ah-Pyrano[3,2-D]Thiazole-6,7-Diol (DrugBank:DB03747)	Experimental (DrugBank:DB03747)
D-04339	s1c(c2ccccc2)ccc1C(=O)NO (TTD:D06NVX)	ONC(=O)c1ccc(s1)c1ccccc1	219.26	2.925	11	TTD:D06NVX
D-04342	CCCCN1C[C@H](O)[C@@H](O)[C@H](O)[C@H]1CO (DrugBank:DB00419)|CCCCN1C[C@H](O)[C@H]([C@@H]([C@H]1CO)O)O (IUPHAR:4841)|[C@H]1([C@H]([C@@H]([C@H](CN1CCCC)O)O)O)CO (KEGG:D05032)|O[C@@H]1[C@H](N(C[C@H](O)[C@H]1O)CCCC)CO (TTD:D0HR8Z)	CCCCN1C[C@H](O)[C@H]([C@@H]([C@H]1CO)O)O	219.278	-1.5164	10	DrugBank:DB00419|IUPHAR:4841|KEGG:D05032|TTD:D0HR8Z	Miglustat (DrugBank:DB00419)|miglustat (IUPHAR:4841)|Miglustat (JAN/USAN/INN) (KEGG:D05032)|Miglustat (TTD:D0HR8Z)	Approved (DrugBank:DB00419)|Approved (IUPHAR:4841)	72599-27-0 (DrugBank:DB00419)|72599-27-0 (KEGG:D05032)	A16AX06 (DrugBank:DB00419)|A16AX06 (KEGG:D05032)	For the treatment of adult patients with mild to moderate type 1 (nonneuropathic) Gaucher's disease for whom enzyme replacement therapy is not a therapeutic option (e.g. due to constraints such as allergy, hypersensitivity, or poor venous access). Now approved in some countries for the treatment of progressive neurological symptoms in adult and pediatric patients with Niemann-Pick disease type C …
D-04343	[C@H]1([C@@H]([C@H](CN([C@@H]1CO)CCCC)O)O)O (KEGG:D11439)	CCCCN1C[C@H](O)[C@H]([C@H]([C@H]1CO)O)O	219.278	-1.5164	10	KEGG:D11439	Lucerastat (USAN/INN) (KEGG:D11439)		141206-42-0 (KEGG:D11439)		Glucosylceramide synthase inhibitor (KEGG:D11439)
D-04348	Nc1ccc(/C=C\2/c3c(C=C2)cccc3)cc1 (TTD:D05HJP)	Nc1ccc(cc1)/C=C/1\C=Cc2c1cccc2	219.281	4.4174	16	TTD:D05HJP
D-04350	CCN(c1ccccc1)C[C@H]1COC(=N1)N (IUPHAR:5862)|O1C[C@@H](N=C1N)CN(CC)c1ccccc1 (TTD:D0O9ZY)	CCN(c1ccccc1)C[C@H]1COC(=N1)N	219.283	1.3623	12	IUPHAR:5862|TTD:D0O9ZY	RO5166017 (IUPHAR:5862)|RO5166017 (TTD:D0O9ZY)				Synthetic organic (IUPHAR:5862)
D-04351	c1(c(ccc(c1)C(CNC(C)C)O)N)C#N (KEGG:D03502)	N#Cc1cc(ccc1N)C(CNC(C)C)O	219.283	2.14398	12	KEGG:D03502	Cimaterol (USAN/INN) (KEGG:D03502)		54239-37-1 (KEGG:D03502)		Repartitioning agent, beta-Adrenergic receptor agonist (KEGG:D03502)
D-04352	S(CC1CC1)c1cc(OC)c(cc1)C#N (TTD:D03MQA)	COc1cc(SCC2CC2)ccc1C#N	219.303	3.06898	12	TTD:D03MQA
D-04354	CC(=N)NCCSCC[C@H](N)C(O)=O (DrugBank:DB12237)	CC(=N)NCCSCC[C@@H](C(=O)O)N	219.304	1.2993	8	DrugBank:DB12237	GW-274150 (DrugBank:DB12237)	Investigational (DrugBank:DB12237)	210354-22-6 (DrugBank:DB12237)
D-04356	CC(=NCCSCC[C@@H](C(=O)O)N)N (IUPHAR:9849)	CC(=NCCSCC[C@@H](C(=O)O)N)N	219.304	1.2993	8	IUPHAR:9849	GW274150 (IUPHAR:9849)				Synthetic organic (IUPHAR:9849)
D-04357	s1c2c(c(N3CCNCC3)ncc2)cc1 (TTD:D0J1VB)	N1CCN(CC1)c1nccc2c1ccs2	219.306	2.0997	11	TTD:D0J1VB
D-04360	Oc1cc(C2CCN(CC2)CCC)ccc1 (TTD:D0X5LJ)	CCCN1CCC(CC1)c1cccc(c1)O	219.323	2.9195	14	TTD:D0X5LJ
D-04361	Oc1cc(C2CN(CCC2)CCC)ccc1 (TTD:D07PMJ)	CCCN1CCCC(C1)c1cccc(c1)O	219.323	2.9195	14	TTD:D07PMJ	(+)-3-(1-Propyl-piperidin-3-yl)-phenol (TTD:D07PMJ)
D-04362	Oc1cc([C@H]2CN(CCC2)CCC)ccc1 (TTD:D06FUV)	CCCN1CCC[C@H](C1)c1cccc(c1)O	219.323	2.9195	14	TTD:D06FUV
D-04364	O(c1ccc(CCN2[C@H](CCC2)C)cc1)C (TTD:D0T8MV)	COc1ccc(cc1)CCN1CCC[C@@H]1C	219.323	2.6599	14	TTD:D0T8MV
D-04365	O(c1ccc(CCN2[C@@H](CCC2)C)cc1)C (TTD:D0MR0Z)	COc1ccc(cc1)CCN1CCC[C@H]1C	219.323	2.6599	14	TTD:D0MR0Z
D-04366	O(c1cc(CCN2[C@H](CCC2)C)ccc1)C (TTD:D0G5TD)	COc1cccc(c1)CCN1CCC[C@@H]1C	219.323	2.6599	14	TTD:D0G5TD
D-04367	O(c1cc(CCN2[C@@H](CCC2)C)ccc1)C (TTD:D0H9IH)	COc1cccc(c1)CCN1CCC[C@H]1C	219.323	2.6599	14	TTD:D0H9IH
D-04368	O(c1c(CCN2[C@H](CCC2)C)cccc1)C (TTD:D06MGO)	COc1ccccc1CCN1CCC[C@@H]1C	219.323	2.6599	14	TTD:D06MGO
D-04369	O(c1c(CCN2[C@@H](CCC2)C)cccc1)C (TTD:D0O9YL)	COc1ccccc1CCN1CCC[C@H]1C	219.323	2.6599	14	TTD:D0O9YL
D-04370	O=C(C(NC(C)(C)C)C)c1ccc(cc1)C (TTD:D09BYB)	Cc1ccc(cc1)C(=O)C(NC(C)(C)C)C	219.323	3.3452	14	TTD:D09BYB
D-04371	O=C(C(NC(C)(C)C)C)c1cc(ccc1)C (TTD:D0Y7CS)	Cc1cccc(c1)C(=O)C(NC(C)(C)C)C	219.323	3.3452	14	TTD:D0Y7CS
D-04373	CCCN1CCC[C@H]2[C@H]1Cc1cn[nH]c1C2 (IUPHAR:2)|C1CN([C@H]2[C@H](C1)Cc1c(C2)cn[nH]1)CCC.Cl (KEGG:D05682)|Cl.N1([C@H]2[C@H](CCC1)Cc1[nH]ncc1C2)CCC (TTD:D00YAS)|N1([C@H]2[C@H](CCC1)Cc1[nH]ncc1C2)CCC (TTD:D0H2WQ)	CCCN1CCC[C@H]2[C@H]1Cc1cn[nH]c1C2	219.326	1.9368	13	IUPHAR:2|KEGG:D05682|TTD:D00YAS|TTD:D0H2WQ	quinpirole (IUPHAR:2)|Quinpirole hydrochloride (USAN) (KEGG:D05682)		85798-08-9 (KEGG:D05682)		Synthetic organic (IUPHAR:2)|Antihypertensive (KEGG:D05682)|Human immunodeficiency virus infection (TTD:D00YAS)
D-04385	Clc1cc(NC(=O)OC)ccc1Cl (TTD:D0NL5M)	COC(=O)Nc1ccc(c(c1)Cl)Cl	220.053	3.2447	8	TTD:D0NL5M	Mycobacterial cell wall-DNA complex (TTD:D0NL5M)				Cancer (TTD:D0NL5M)
D-04388	o1c2c(cc(OC)cc2)cc(c1=O)C(=O)O (TTD:D00XJA)	COc1ccc2c(c1)cc(c(=O)o2)C(=O)O	220.178	1.4998	11	TTD:D00XJA
D-04389	o1c2c(c(cc1=O)C(=O)O)ccc(OC)c2 (TTD:D0RB0D)	COc1ccc2c(c1)oc(=O)cc2C(=O)O	220.178	1.4998	11	TTD:D0RB0D
D-04390	o1c2c(cc(c1=O)C(=O)O)cccc2OC (TTD:D06DYP)	COc1cccc2c1oc(=O)c(c2)C(=O)O	220.178	1.4998	11	TTD:D06DYP
D-04391	Oc1c2c(cc(O)c1O)cccc(=O)c2O (TTD:D0R7MJ)	Oc1cc2cccc(=O)c(c2c(c1O)O)O	220.178	1.0224	11	TTD:D0R7MJ
D-04396	N[C@@H](CC1=CNC2=C1C=C(O)C=C2)C(O)=O (DrugBank:DB02959)|OC(=O)[C@H](Cc1c[nH]c2c1cc(O)cc2)N (IUPHAR:4671)|c1(ccc2c(c1)c(c[nH]2)C[C@H](N)C(=O)O)O (KEGG:D07339)|Oc1cc2c(C[C@H](N)C(=O)O)c[nH]c2cc1 (TTD:D09BNS)	OC(=O)[C@H](Cc1c[nH]c2c1cc(O)cc2)N	220.225	1.5282	11	DrugBank:DB02959|IUPHAR:4671|KEGG:D07339|TTD:D09BNS	Oxitriptan (DrugBank:DB02959)|5-hydroxy-L-tryptophan (IUPHAR:4671)|Oxitriptan (INN) (KEGG:D07339)|5-hydroxy-L-tryptophan (TTD:D09BNS)	Approved; Investigational; Nutraceutical (DrugBank:DB02959)	4350-09-8 (DrugBank:DB02959)|4350-09-8 (KEGG:D07339)	N06AX01 (DrugBank:DB02959)|N06AX01 (KEGG:D07339)	For use as an antidepressant, appetite suppressant, and sleep aid. (DrugBank:DB02959)|Metabolite (IUPHAR:4671)|Antidepressant (KEGG:D07339)
D-04398	O=C1C2=CC=CC3=C2C(=NN3)C2=C1C=CC=C2 (DrugBank:DB01782)|O=c1c2ccccc2c2c3c1cccc3[nH]n2 (IUPHAR:5273)|O=c1c2c3c(n[nH]c3ccc2)c2c1cccc2 (TTD:D00JXM)|O=c1c2c3c(n[nH]c3ccc2)c2c1cccc2 (TTD:D02PVB)	O=c1c2ccccc2c2c3c1cccc3[nH]n2	220.226	2.6673	14	DrugBank:DB01782|IUPHAR:5273|TTD:D00JXM|TTD:D02PVB	2,6-Dihydroanthra/1,9-Cd/Pyrazol-6-One (DrugBank:DB01782)|SP600125 (IUPHAR:5273)	Experimental (DrugBank:DB01782)			Synthetic organic (IUPHAR:5273)
D-04400	O=c1n(c(=O)n(c2ncn(c12)CC=C)C)C (TTD:D0RZ5U)	C=CCn1cnc2c1c(=O)n(C)c(=O)n2C	220.228	-0.3803	10	TTD:D0RZ5U
D-04401	O(c1nc(NC(=O)C)cc(N)c1C#N)CC (TTD:D0Q3NG)	CCOc1nc(NC(=O)C)cc(c1C#N)N	220.228	1.54678	10	TTD:D0Q3NG
D-04402	O=c1n(C2CCCC2)c(=O)[nH]c2nc[nH]c12 (TTD:D0K8ZW)	O=c1[nH]c2nc[nH]c2c(=O)n1C1CCCC1	220.228	0.528	10	TTD:D0K8ZW
D-04404	s1c(c2ncccc2)ccc1C(=O)NO (TTD:D05PYF)	ONC(=O)c1ccc(s1)c1ccccn1	220.248	2.32	10	TTD:D05PYF
D-04405	s1c(c2cccnc2)ccc1C(=O)NO (TTD:D00PLM)	ONC(=O)c1ccc(s1)c1cccnc1	220.248	2.32	10	TTD:D00PLM
D-04406	s1c(c2ccncc2)ccc1C(=O)NO (TTD:D0A7IF)	ONC(=O)c1ccc(s1)c1ccncc1	220.248	2.32	10	TTD:D0A7IF
D-04409	Oc1ccc(c2cc3c(cc2)cccc3)cc1 (TTD:D0L3AX)	Oc1ccc(cc1)c1ccc2c(c1)cccc2	220.266	4.2124	16	TTD:D0L3AX
D-04410	Oc1cc2c(ccc(c2)c2ccccc2)cc1 (TTD:D0SR8Q)	Oc1ccc2c(c1)cc(cc2)c1ccccc1	220.266	4.2124	16	TTD:D0SR8Q
D-04411	Oc1cc2c(cc(c3ccccc3)cc2)cc1 (TTD:D0UV9G)	Oc1ccc2c(c1)ccc(c2)c1ccccc1	220.266	4.2124	16	TTD:D0UV9G
D-04412	Oc1cc(c2cc3c(cc2)cccc3)ccc1 (TTD:D0F6ZH)	Oc1cccc(c1)c1ccc2c(c1)cccc2	220.266	4.2124	16	TTD:D0F6ZH
D-04415	s1c2c(c3c(scc3)C(=O)C2=O)cc1 (TTD:D05ZCX)	O=C1C(=O)c2sccc2c2c1scc2	220.268	2.8556	10	TTD:D05ZCX
D-04416	[O-][N+](=O)c1ccc(CCN2CCCC2)cc1 (TTD:D0S5ON)	O=N(=O)c1ccc(cc1)CCN1CCCC1	220.268	2.6942	12	TTD:D0S5ON
D-04423	c1ccc(cc1)c1nc[nH]c1c1ccccc1 (KEGG:D02067)	c1ccc(cc1)c1[nH]cnc1c1ccccc1	220.269	3.7437	15	KEGG:D02067	Diphenylimidazole (JAN) (KEGG:D02067)		668-94-0 (KEGG:D02067)		Antipruritic, H1 receptor antagonist (KEGG:D02067)
D-04425	S(CCCC(CCC(=O)O)C(=O)O)C (TTD:D0Q2OH)	CSCCCC(C(=O)O)CCC(=O)O	220.286	1.6952	9	TTD:D0Q2OH
D-04426	SCCCCC(CCC(=O)O)C(=O)O (TTD:D08TDE)	SCCCCC(C(=O)O)CCC(=O)O	220.286	1.6521	9	TTD:D08TDE
D-04428	s1c2ncnc(N3CCNCC3)c2cc1 (TTD:D01FOM)	N1CCN(CC1)c1ncnc2c1ccs2	220.294	1.4947	10	TTD:D01FOM
D-04429	s1c2c(N3CCNCC3)ncnc2cc1 (TTD:D00DHV)	N1CCN(CC1)c1ncnc2c1scc2	220.294	1.4947	10	TTD:D00DHV
D-04432	OC(=O)CCCCCC#CC#CCCCC (TTD:D09EBV)	CCCCC#CC#CCCCCCC(=O)O	220.307	3.2185	14	TTD:D09EBV
D-04434	O=C1C(=CC(=CC1=O)C(C)(C)C)C(C)(C)C (TTD:D0Z1WQ)	O=C1C=C(C=C(C1=O)C(C)(C)C)C(C)(C)C	220.307	3.0832	14	TTD:D0Z1WQ
D-04436	Oc1cc(N2CCN(CC2)CCC)ccc1 (TTD:D00CPI)	CCCN1CCN(CC1)c1cccc(c1)O	220.311	1.9271	13	TTD:D00CPI
D-04438	CCCNC(C)C(=O)NC1=CC=CC=C1C (DrugBank:DB00750)|c1(NC(=O)C(NCCC)C)c(cccc1)C (KEGG:D00553)|c1cc(c(cc1)NC(=O)C(NCCC)C)C.Cl (KEGG:D01243)|O=C(Nc1c(cccc1)C)C(NCCC)C (TTD:D06LYG)	CCCNC(C(=O)Nc1ccccc1C)C	220.311	2.7855	13	DrugBank:DB00750|KEGG:D00553|KEGG:D01243|TTD:D06LYG	Prilocaine (DrugBank:DB00750)|Prilocaine (USP/INN) (KEGG:D00553)|Prilocaine hydrochloride (USP) (KEGG:D01243)|Prilocaine (TTD:D06LYG)	Approved (DrugBank:DB00750)	721-50-6 (DrugBank:DB00750)|721-50-6 (KEGG:D00553)|1786-81-8 (KEGG:D01243)	N01BB04; N01BB54 (DrugBank:DB00750)|N01BB04 (KEGG:D00553)|N01BB04 (KEGG:D01243)	Used as a local anaesthetic and is often used in dentistry. (DrugBank:DB00750)|Anesthetic (local) (KEGG:D00553)|Anesthetic (local) (KEGG:D01243)|Pain (TTD:D06LYG)
D-04440	S(SC1=CC=NC=C1)C1=CC=NC=C1 (DrugBank:DB07623)	n1ccc(cc1)SSc1ccncc1	220.314	3.276	10	DrugBank:DB07623	4,4'-DIPYRIDYL DISULFIDE (DrugBank:DB07623)	Experimental (DrugBank:DB07623)
D-04442	CC1=CC=CC(C)=C1NC1=NCCCS1 (DrugBank:DB11477)|Cc1cccc(c1NC1=NCCCS1)C (IUPHAR:523)|c1cc(c(c(c1)C)NC1=NCCCS1)C.Cl (KEGG:D06344)|c1cc(c(c(c1)C)NC1=NCCCS1)C (KEGG:D08683)|S1CCCN=C1Nc1c(cccc1C)C (TTD:D0Y2JI)	Cc1cccc(c1NC1=NCCCS1)C	220.334	2.7168	12	DrugBank:DB11477|IUPHAR:523|KEGG:D06344|KEGG:D08683|TTD:D0Y2JI	Xylazine (DrugBank:DB11477)|xylazine (IUPHAR:523)|Xylazine hydrochloride (USP) (KEGG:D06344)|Xylazine (USP/INN) (KEGG:D08683)|xylazine (TTD:D0Y2JI)	Vet_approved (DrugBank:DB11477)	7361-61-7 (DrugBank:DB11477)|23076-35-9 (KEGG:D06344)|7361-61-7 (KEGG:D08683)		Synthetic organic (IUPHAR:523)|Analgesic, Muscle relaxant (veterinary), alpha2-Adrenergic receptor agonist (KEGG:D06344)|Analgesic (veterinary), alpha2-Adrenergic receptor agonist (KEGG:D08683)
D-04443	c1(cc(cc(c1O)C(C)(C)C)C)C(C)(C)C (KEGG:D02413)|Oc1c(C(C)(C)C)cc(cc1C(C)(C)C)C (TTD:D0W1SL)	Cc1cc(c(c(c1)C(C)(C)C)O)C(C)(C)C	220.35	4.2956	15	KEGG:D02413|TTD:D0W1SL	Butylated hydroxytoluene (NF) (KEGG:D02413)		128-37-0 (KEGG:D02413)		Pharmaceutic aid (antioxidant) (KEGG:D02413)
D-04446	Clc1cn(nc1)C(=O)c1c(cccc1)C (TTD:D0I1AC)	Clc1cnn(c1)C(=O)c1ccccc1C	220.655	2.5334	11	TTD:D0I1AC
D-04449	COP(=O)(OC)OC=C(Cl)Cl (DrugBank:DB11397)|O(P(=O)(OC=C(Cl)Cl)OC)C (KEGG:D03791)	COP(=O)(OC=C(Cl)Cl)OC	220.976	2.6804	4	DrugBank:DB11397|KEGG:D03791	Dichlorvos (DrugBank:DB11397)|Dichlorvos (USAN/INN) (KEGG:D03791)	Vet_approved (DrugBank:DB11397)	62-73-7 (DrugBank:DB11397)|62-73-7 (KEGG:D03791)		Anthelmintic, Acetylcholinesterase inhibitor (KEGG:D03791)
D-04450	Brc1c([nH]c(=O)[nH]c1=O)NN.Cl (TTD:D00PMF)	NNc1[nH]c(=O)[nH]c(=O)c1Br	221.012	-0.1154	4	TTD:D00PMF
D-04453	Clc1cc(NC(=O)NO)ccc1Cl (TTD:D09UQM)	ONC(=O)Nc1ccc(c(c1)Cl)Cl	221.041	2.968	7	TTD:D09UQM
D-04466	OC(=O)c1ccc2c(c1)CCC2(N)C(=O)O (IUPHAR:1376)|OC(=O)C1(N)CCc2c1ccc(c2)C(=O)O (TTD:D04JKL)	OC(=O)c1ccc2c(c1)CCC2(N)C(=O)O	221.209	1.2699	11	IUPHAR:1376|TTD:D04JKL	AIDA (IUPHAR:1376)|AIDA (TTD:D04JKL)				Synthetic organic (IUPHAR:1376)
D-04467	S(=O)(=O)(N)C(F)(F)c1ccc(cc1)C (TTD:D06GPL)	FC(S(=O)(=O)N)(c1ccc(cc1)C)F	221.224	3.1139	8	TTD:D06GPL
D-04470	CC(=O)c1ccc(cc1O)N1CCOCC1 (IUPHAR:5960)|O1CCN(CC1)c1cc(O)c(cc1)C(=O)C (TTD:D06GNE)	CC(=O)c1ccc(cc1O)N1CCOCC1	221.252	1.4964	12	IUPHAR:5960|TTD:D06GNE	DNA-PK inhibitor III (IUPHAR:5960)|IC86621 (TTD:D06GNE)				Synthetic organic (IUPHAR:5960)
D-04471	c12c(CN(CC1)C)c(c1c(c2)OCO1)OC.Cl.O (KEGG:D02031)	COc1c2CN(C)CCc2cc2c1OCO2	221.252	1.3497	12	KEGG:D02031	Hydrocotarnine hydrochloride hydrate (JP17) (KEGG:D02031)				Analgesic, Antitussive (KEGG:D02031)
D-04473	O=C(CCCCC(=O)NO)c1ccccc1 (TTD:D0L4ML)	ONC(=O)CCCCC(=O)c1ccccc1	221.252	2.326	12	TTD:D0L4ML
D-04474	Oc1cc2c(cc(cc2)c2cccnc2)cc1 (TTD:D02ALK)	Oc1ccc2c(c1)ccc(c2)c1cccnc1	221.254	3.6074	15	TTD:D02ALK
D-04480	O(c1cc(CCCNC(=O)CC)ccc1)C (TTD:D0D6IK)	CCC(=O)NCCCc1cccc(c1)OC	221.295	2.5449	13	TTD:D0D6IK
D-04481	CCC(C(=O)N(Cc1ccccc1)O)(C)C (IUPHAR:9643)	CCC(C(=O)N(Cc1ccccc1)O)(C)C	221.295	2.8406	13	IUPHAR:9643	RIPA-56 (IUPHAR:9643)				Synthetic organic (IUPHAR:9643)
D-04483	O1[C@@H](CN(CC1)CCC)c1cc(O)ccc1 (TTD:D04TWX)	CCCN1CCO[C@@H](C1)c1cccc(c1)O	221.295	2.1134	13	TTD:D04TWX
D-04484	O1[C@](O)([C@@H](NC(C1)(C)C)C)c1ccccc1 (TTD:D00QCP)	C[C@@H]1NC(C)(C)CO[C@@]1(O)c1ccccc1	221.295	1.9474	13	TTD:D00QCP
D-04487	[nH]1c2c3CCCCc3ccc2c2c1cccc2 (TTD:D0V6CM)	C1CCc2c(C1)ccc1c2[nH]c2c1cccc2	221.297	4.1999	16	TTD:D0V6CM
D-04489	n1cc(C2=C(c3c(CC2)cccc3)C)ccc1 (TTD:D0K5KG)	CC1=C(CCc2c1cccc2)c1cccnc1	221.297	3.9585	16	TTD:D0K5KG
D-04490	n1cc(/C=C\2/CC(c3c2cccc3)C)ccc1 (TTD:D02BWQ)	CC1C/C(=C/c2cccnc2)/c2c1cccc2	221.297	4.1294	16	TTD:D02BWQ
D-04491	n1cc(/C=C/2\CC(c3c2cccc3)C)ccc1 (TTD:D0TM4K)	CC1C/C(=C\c2cccnc2)/c2c1cccc2	221.297	4.1294	16	TTD:D0TM4K
D-04492	n1cc(C2=Cc3c(C(C2)C)cccc3)ccc1 (TTD:D0X1QS)	CC1CC(=Cc2c1cccc2)c1cccnc1	221.297	4.1294	16	TTD:D0X1QS
D-04493	n1cc(C2=Cc3c(CC2C)cccc3)ccc1 (TTD:D08HPU)	CC1Cc2ccccc2C=C1c1cccnc1	221.297	3.8144	16	TTD:D08HPU
D-04494	C[C@]12N[C@@H](c3c2cccc3)Cc2c1cccc2 (IUPHAR:2403)|C(=C\C(=O)O)\C(=O)O.[C@@H]12Cc3c([C@@](c4c1cccc4)(N2)C)cccc3 (KEGG:D03878)|N1[C@@]2(c3c([C@H]1Cc1c2cccc1)cccc3)C (TTD:D02KLW)	C[C@]12N[C@@H](c3c2cccc3)Cc2c1cccc2	221.297	3.4793	16	IUPHAR:2403|KEGG:D03878|TTD:D02KLW	dizocilpine (IUPHAR:2403)|Dizocilpine maleate (USAN) (KEGG:D03878)		77086-22-7 (KEGG:D03878)		Synthetic organic (IUPHAR:2403)|Neuroprotectant (KEGG:D03878)|Cerebrovascular ischaemia (TTD:D02KLW)
D-04496	n1ccc(/C=C/2\CCc3c2cc(cc3)C)cc1 (TTD:D0D8GU)	Cc1ccc2c(c1)/C(=C/c1ccncc1)/CC2	221.297	3.8768	16	TTD:D0D8GU
D-04498	n1ccc(/C=C\2/CCc3c2cc(cc3)C)cc1 (TTD:D07ZCD)	Cc1ccc2c(c1)/C(=C\c1ccncc1)/CC2	221.297	3.8768	16	TTD:D07ZCD
D-04499	n1c(cccc1C)C#CCCc1ccccc1 (TTD:D0JH2D)	Cc1cccc(n1)C#CCCc1ccccc1	221.297	3.3743	16	TTD:D0JH2D
D-04501	n1cc(/C=C/2\CCc3c2cccc3C)ccc1 (TTD:D04CLL)	Cc1cccc2c1CC/C/2=C\c1cccnc1	221.297	3.8768	16	TTD:D04CLL
D-04502	NCC1c2c(C=Cc3c1cccc3)cccc2 (TTD:D0L0MU)	NCC1c2ccccc2C=Cc2c1cccc2	221.297	3.9613	16	TTD:D0L0MU
D-04504	Nc1ccc(CC2c3c(C=C2)cccc3)cc1 (TTD:D09LVG)	Nc1ccc(cc1)CC1C=Cc2c1cccc2	221.297	4.2031	16	TTD:D09LVG
D-04506	CNNCC1=CC=C(C=C1)C(=O)NC(C)C (DrugBank:DB01168)|CNNCc1ccc(cc1)C(=O)NC(C)C (IUPHAR:7278)|c1(C(=O)NC(C)C)ccc(cc1)CNNC.Cl (KEGG:D00478)|c1(C(=O)NC(C)C)ccc(cc1)CNNC (KEGG:D08423)|O=C(NC(C)C)c1ccc(CNNC)cc1 (TTD:D08GYO)	CNNCc1ccc(cc1)C(=O)NC(C)C	221.299	2.2215	12	DrugBank:DB01168|IUPHAR:7278|KEGG:D00478|KEGG:D08423|TTD:D08GYO	Procarbazine (DrugBank:DB01168)|procarbazine (IUPHAR:7278)|Procarbazine hydrochloride (JP17/USP) (KEGG:D00478)|Procarbazine (INN) (KEGG:D08423)|Procarbazine (TTD:D08GYO)	Approved; Investigational (DrugBank:DB01168)|Approved (IUPHAR:7278)	671-16-9 (DrugBank:DB01168)|366-70-1 (KEGG:D00478)|671-16-9 (KEGG:D08423)	L01XB01 (DrugBank:DB01168)|L01XB01 (KEGG:D00478)|L01XB01 (KEGG:D08423)	For use with other anticancer drugs for the treatment of stage III and stage IV Hodgkin's disease. (DrugBank:DB01168)|Synthetic organic (IUPHAR:7278)|Antineoplastic (KEGG:D00478)|Antineoplastic (KEGG:D08423)|Hodgkin's lymphoma (TTD:D08GYO)
D-04508	N[C@@H]1CCN(C1)c1cc(nc(n1)N)C(C)C (IUPHAR:8984)	N[C@@H]1CCN(C1)c1cc(nc(n1)N)C(C)C	221.302	2.0661	11	IUPHAR:8984	JNJ-39758979 (IUPHAR:8984)				Synthetic organic (IUPHAR:8984)
D-04510	S(CCCC)c1cc(OC)c(cc1)C#N (TTD:D05FPU)	CCCCSc1ccc(c(c1)OC)C#N	221.319	3.45908	12	TTD:D05FPU
D-04513	CC[C@H]([C@@H](C)CN(C)C)C1=CC(O)=CC=C1 (DrugBank:DB06204)|CC[C@@H](c1cccc(c1)O)[C@H](CN(C)C)C (IUPHAR:7477)|c1(cccc(c1)[C@@H]([C@H](CN(C)C)C)CC)O (KEGG:D06007)|c1(cccc(c1)[C@@H]([C@H](CN(C)C)C)CC)O.Cl (KEGG:D10199)|Oc1cc([C@@H]([C@H](CN(C)C)C)CC)ccc1 (TTD:D0K4MH)	CC[C@@H](c1cccc(c1)O)[C@H](CN(C)C)C	221.339	3.0835	14	DrugBank:DB06204|IUPHAR:7477|KEGG:D06007|KEGG:D10199|TTD:D0K4MH	Tapentadol (DrugBank:DB06204)|tapentadol (IUPHAR:7477)|Tapentadol (USAN/INN) (KEGG:D06007)|Tapentadol hydrochloride (JAN) (KEGG:D10199)	Approved (DrugBank:DB06204)|Approved (IUPHAR:7477)	175591-23-8 (DrugBank:DB06204)|175591-23-8 (KEGG:D06007)|175591-09-0 (KEGG:D10199)	N02AX06 (DrugBank:DB06204)|N02AX06 (KEGG:D06007)|N02AX06 (KEGG:D10199)	The immediate-release formulation of tapentadol is indicated for the relief of moderate to severe acute pain. The long-acting formulation serves as a continuous, around-the-clock analgesic that is indicated for the relief of moderate to severe chronic pain or neuropathic pain associated with diabetic peripheral neuropathy. (DrugBank:DB06204)|Synthetic organic (IUPHAR:7477)|Analgesic, Opioid recep…
D-04516	Clc1cc(S(=O)(=O)N)ccc1NN (TTD:D01UDU)	NNc1ccc(cc1Cl)S(=O)(=O)N	221.665	2.8274	6	TTD:D01UDU
D-04518	NCCc1cnc([nH]1)c1cccc(c1)Cl (IUPHAR:1195)|Clc1cc(c2[nH]c(CCN)cn2)ccc1 (TTD:D0T7AR)	NCCc1cnc([nH]1)c1cccc(c1)Cl	221.686	2.9316	11	IUPHAR:1195|TTD:D0T7AR	2-(3-chlorophenyl)histamine (IUPHAR:1195)				Synthetic organic (IUPHAR:1195)
D-04522	P(=O)(O)(O)C(=O)N[C@H]1[C@@H](N)CCCC1 (TTD:D0T1FR)	N[C@H]1CCCC[C@H]1NC(=O)P(=O)(O)O	222.179	1.2348	7	TTD:D0T1FR
D-04525	O=C(NO)c1cc(ccc1)/C=C/C(=O)NO (TTD:D03SZR)	ONC(=O)/C=C/c1cccc(c1)C(=O)NO	222.197	1.106	10	TTD:D03SZR	M-carboxycinnamic acid bishydroxamide (TTD:D03SZR)				Cancer (TTD:D03SZR)
D-04526	FC(F)(F)c1ccc(c2ccccc2)cc1 (TTD:D0N5OD)	FC(c1ccc(cc1)c1ccccc1)(F)F	222.206	4.3724	13	TTD:D0N5OD
D-04530	[H]\C(=C(\[H])C1=CC(OC)=C(O)C=C1)C(=O)OCC (DrugBank:DB11285)	CCOC(=O)/C=C/c1ccc(c(c1)OC)O	222.237	1.9771	12	DrugBank:DB11285	Ethyl ferulate (DrugBank:DB11285)	Approved; Experimental (DrugBank:DB11285)	4046-02-0 (DrugBank:DB11285)
D-04535	O=C1C=C(OC2=CC=CC=C12)C1=CC=CC=C1 (DrugBank:DB07776)|O=c1cc(oc2c1cccc2)c1ccccc1 (IUPHAR:409)|o1c(c2ccccc2)cc(=O)c2c1cccc2 (TTD:D08RVN)|o1c(c2ccccc2)cc(=O)c2c1cccc2 (TTD:D0S0RK)	O=c1cc(oc2c1cccc2)c1ccccc1	222.239	3.46	15	DrugBank:DB07776|IUPHAR:409|TTD:D08RVN|TTD:D0S0RK	Flavone (DrugBank:DB07776)|flavone (IUPHAR:409)	Approved; Experimental (DrugBank:DB07776)	525-82-6 (DrugBank:DB07776)		Natural product (IUPHAR:409)
D-04536	OC(=O)c1c2ccccc2cc2c1cccc2 (IUPHAR:4113)|OC(=O)c1c2c(cc3c1cccc3)cccc2 (TTD:D0O6KR)	OC(=O)c1c2ccccc2cc2c1cccc2	222.239	3.6912	15	IUPHAR:4113|TTD:D0O6KR	9-anthroic acid (IUPHAR:4113)|9-anthroic acid (TTD:D0O6KR)				Synthetic organic (IUPHAR:4113)
D-04539	O=c1[nH]c2c3c(c4c([nH]c(c4)C)cc13)ccc2 (TTD:D04RQU)	Cc1[nH]c2c(c1)c1cccc3c1c(c2)c(=O)[nH]3	222.242	2.9088	14	TTD:D04RQU
D-04543	CC(C)CN1C2=C(N=CN2)C(=O)N(C)C1=O (DrugBank:DB07954)	CC(Cn1c(=O)n(C)c(=O)c2c1[nH]cn2)C	222.244	0.0793	10	DrugBank:DB07954	3-isobutyl-1-methyl-7H-xanthine (DrugBank:DB07954)	Experimental (DrugBank:DB07954)	28822-58-4 (DrugBank:DB07954)
D-04544	CC(Cn1c(=O)n(C)c(=O)c2c1nc[nH]2)C (IUPHAR:388)|O=c1n(CC(C)C)c2nc[nH]c2c(=O)n1C (TTD:D03ADX)|O=c1n(CC(C)C)c2nc[nH]c2c(=O)n1C (TTD:D0GY2T)|O=c1n(CC(C)C)c2nc[nH]c2c(=O)n1C (TTD:D0R6MT)	CC(Cn1c(=O)n(C)c(=O)c2c1nc[nH]2)C	222.244	0.0793	10	IUPHAR:388|TTD:D03ADX|TTD:D0GY2T|TTD:D0R6MT	isobutylmethylxanthine (IUPHAR:388)|3-Isobutyl-1-methyl-3,9-dihydro-purine-2,6-dione (TTD:D03ADX)|isobutylmethylxanthine (TTD:D0R6MT)				Synthetic organic (IUPHAR:388)
D-04545	O=c1n(CCCC)c(=O)n(c2nc[nH]c12)C (TTD:D00JBC)	CCCCn1c(=O)c2[nH]cnc2n(c1=O)C	222.244	0.2234	10	TTD:D00JBC
D-04547	CC(=O)NC1=NN=C(S1)S(N)(=O)=O (DrugBank:DB00819)|CC(=O)Nc1nnc(s1)S(=O)(=O)N (IUPHAR:6792)|c1(sc(nn1)NC(=O)C)S(=O)(=O)N (KEGG:D00218)|S(=O)(=O)(N)c1sc(NC(=O)C)nn1 (TTD:D0E1SW)	CC(=O)Nc1nnc(s1)S(=O)(=O)N	222.245	0.998	4	DrugBank:DB00819|IUPHAR:6792|KEGG:D00218|TTD:D0E1SW	Acetazolamide (DrugBank:DB00819)|acetazolamide (IUPHAR:6792)|Acetazolamide (JP17/USP/INN) (KEGG:D00218)|Acetazolamide (TTD:D0E1SW)	Approved; Vet_approved (DrugBank:DB00819)|Approved (IUPHAR:6792)	59-66-5 (DrugBank:DB00819)|59-66-5 (KEGG:D00218)	G01AE10; S01EC01 (DrugBank:DB00819)|S01EC01 (KEGG:D00218)	For adjunctive treatment of: edema due to congestive heart failure; drug-induced edema; centrencephalic epilepsies; chronic simple (open-angle) glaucoma (DrugBank:DB00819)|Synthetic organic (IUPHAR:6792)|Antiglaucoma, Carbonic anhydrase inhibitor (KEGG:D00218)|Glaucoma (TTD:D0E1SW)
D-04549	P(=O)(O)(O)CCCCCCCCCC (TTD:D06YTN)	CCCCCCCCCCP(=O)(O)O	222.262	3.3048	10	TTD:D06YTN
D-04551	CS(=O)(=O)NC1=CC=CC2=C1N=CC=C2 (DrugBank:DB08451)	CS(=O)(=O)Nc1cccc2c1nccc2	222.264	2.7601	10	DrugBank:DB08451	N-(QUINOLIN-8-YL)METHANESULFONAMIDE (DrugBank:DB08451)	Experimental (DrugBank:DB08451)
D-04552	O=c1sn(c(=O)n1Cc1ccccc1)C (IUPHAR:5977)|s1n(c(=O)n(Cc2ccccc2)c1=O)C (TTD:D06KNK)	O=c1sn(c(=O)n1Cc1ccccc1)C	222.264	0.6568	10	IUPHAR:5977|TTD:D06KNK	GSK-3beta inhibitor I (IUPHAR:5977)|TDZD-8 (TTD:D06KNK)				Synthetic organic (IUPHAR:5977)
D-04559	COc1cccc(c1)N(CCNC(=O)C)C (IUPHAR:7777)|O(c1cc(N(CCNC(=O)C)C)ccc1)C (TTD:D0K1HD)	COc1cccc(c1)N(CCNC(=O)C)C	222.284	1.6584	12	IUPHAR:7777|TTD:D0K1HD	UCM 793 (IUPHAR:7777)|UCM 793 (TTD:D0K1HD)				Synthetic organic (IUPHAR:7777)
D-04560	O=C(CCCC1CCNCC1)c1occn1 (TTD:D0D6TB)	O=C(c1ncco1)CCCC1CCNCC1	222.284	2.356	12	TTD:D0D6TB
D-04561	[nH]1c(C(c2c3c(ccc2)cccc3)C)cnc1 (TTD:D0P5PW)	CC(c1cccc2c1cccc2)c1cnc[nH]1	222.285	3.7147	15	TTD:D0P5PW
D-04562	[nH]1c2c(c(Cc3ccc(N)cc3)c1)cccc2 (TTD:D09VSK)	Nc1ccc(cc1)Cc1c[nH]c2c1cccc2	222.285	3.9221	15	TTD:D09VSK
D-04563	n1(Cc2ccc(N)cc2)c2c(cc1)cccc2 (TTD:D0FV7K)	Nc1ccc(cc1)Cn1ccc2c1cccc2	222.285	3.853	15	TTD:D0FV7K
D-04570	O=C(C1CCCCC1)C(=O)C1CCCCC1 (TTD:D0LJ2F)	O=C(C(=O)C1CCCCC1)C1CCCCC1	222.323	3.2852	14	TTD:D0LJ2F
D-04577	OC[C@@H]1[C@@]2([C@H]3[C@H]([C@@H]1CC3)C(CCC2)(C)C)C (TTD:D0M7YB)	OC[C@H]1[C@H]2CC[C@H]3[C@]1(C)CCCC([C@@H]23)(C)C	222.366	3.4673	15	TTD:D0M7YB
D-04578	S(=O)(SCCC(C)C)CCC(C)C (TTD:D0T0IR)	CC(CCSS(=O)CCC(C)C)C	222.411	4.3412	10	TTD:D0T0IR
D-04580	ClCC(=O)c1oc(c2ncccc2)cn1 (TTD:D03YUT)	ClCC(=O)c1ncc(o1)c1ccccn1	222.628	2.1581	10	TTD:D03YUT
D-04581	Clc1[nH]c(=O)[nH]c(=O)c1c1ccccc1 (TTD:D01IGW)	Clc1[nH]c(=O)[nH]c(=O)c1c1ccccc1	222.628	1.3836	10	TTD:D01IGW
D-04584	Clc1ncc(C2C3N(C(C2)CC3)C)cc1 (TTD:D0P9ED)	CN1C2CCC1C(C2)c1ccc(nc1)Cl	222.714	2.623	12	TTD:D0P9ED
D-04585	Clc1nc(c(C2C3NC(C2)CC3)cc1)C (TTD:D0U2HZ)	Cc1nc(Cl)ccc1C1CC2NC1CC2	222.714	2.9801	12	TTD:D0U2HZ
D-04590	OC(=O)[C@H]1NCC[C@H](C1)CP(=O)(O)O (IUPHAR:4155)|C1[C@@H](CCN[C@@H]1C(=O)O)CP(=O)(O)O (KEGG:D02410)|P(=O)(O)(O)C[C@H]1C[C@H](NCC1)C(=O)O (TTD:D0H1FV)	OC(=O)[C@H]1NCC[C@H](C1)CP(=O)(O)O	223.164	-0.0543	7	IUPHAR:4155|KEGG:D02410|TTD:D0H1FV	selfotel (IUPHAR:4155)|Selfotel (USAN/INN) (KEGG:D02410)		110347-85-8 (KEGG:D02410)		Synthetic organic (IUPHAR:4155)|NMDA receptor antagonist (KEGG:D02410)|Cerebrovascular ischaemia (TTD:D0H1FV)
D-04600	N[C@@H]([C@@H](C(=O)O)Cc1ccccc1)C(=O)O (IUPHAR:4625)|OC(=O)[C@@H](Cc1ccccc1)[C@H](N)C(=O)O (TTD:D09HET)	N[C@@H]([C@@H](C(=O)O)Cc1ccccc1)C(=O)O	223.225	1.0421	11	IUPHAR:4625|TTD:D09HET	L-&beta;-BA (IUPHAR:4625)|L-beta-BA (TTD:D09HET)				Synthetic organic (IUPHAR:4625)
D-04602	O=C(CCC(=O)NO)c1ccc(OC)cc1 (TTD:D08ZDD)	ONC(=O)CCC(=O)c1ccc(cc1)OC	223.225	1.5544	11	TTD:D08ZDD
D-04604	O=C1c2c(C(=O)c3c1cccc3)cccc2N (TTD:D0C8ON)	Nc1cccc2c1C(=O)c1ccccc1C2=O	223.227	2.6254	14	TTD:D0C8ON
D-04605	O=C1N(c2c(C1=O)cccc2)c1ccccc1 (TTD:D01HRG)	O=C1C(=O)c2c(N1c1ccccc1)cccc2	223.227	2.6126	14	TTD:D01HRG
D-04607	O=C1Nc2c(C1)cc(c1[nH]c(cc1)C#N)cc2 (TTD:D06DSF)	N#Cc1ccc([nH]1)c1ccc2c(c1)CC(=O)N2	223.23	2.18598	13	TTD:D06DSF
D-04610	NC1=CC=CC2=CC(=CC=C12)S(O)(=O)=O (DrugBank:DB08238)|S(=O)(=O)(O)c1cc2c(c(N)ccc2)cc1 (TTD:D0I7FI)	Nc1cccc2c1ccc(c2)S(=O)(=O)O	223.248	3.3307	10	DrugBank:DB08238|TTD:D0I7FI	5-AMINO-NAPHTALENE-2-MONOSULFONATE (DrugBank:DB08238)	Experimental (DrugBank:DB08238)
D-04612	S1C(Cc2ccc(O)cc2)C(=O)NC1=O (TTD:D0S2BV)	O=C1NC(=O)SC1Cc1ccc(cc1)O	223.248	1.6151	10	TTD:D0S2BV
D-04619	CCCCOC1=CC=C(CC(=O)NO)C=C1 (DrugBank:DB13346)|CCCCOc1ccc(cc1)CC(=O)NO (IUPHAR:7498)|c1c(ccc(c1)CC(=O)NO)OCCCC (KEGG:D01271)|O(CCCC)c1ccc(CC(=O)NO)cc1 (TTD:D02HXS)	CCCCOc1ccc(cc1)CC(=O)NO	223.268	2.3043	12	DrugBank:DB13346|IUPHAR:7498|KEGG:D01271|TTD:D02HXS	Bufexamac (DrugBank:DB13346)|bufexamac (IUPHAR:7498)|Bufexamac (JAN/INN) (KEGG:D01271)	Approved; Withdrawn (DrugBank:DB13346)|Approved; Withdrawn (IUPHAR:7498)	2438-72-4 (DrugBank:DB13346)|2438-72-4 (KEGG:D01271)	M01AB17; M02AA09 (DrugBank:DB13346)|M01AB17; M02AA09 (KEGG:D01271)	Indicated for the treatment of various skin conditions, such as atopic eczema and other inflammatory dermatoses. (DrugBank:DB13346)|Synthetic organic (IUPHAR:7498)|Anti-inflammatory, COX inhibitor (KEGG:D01271)|Dermatitis (TTD:D02HXS)
D-04622	O(c1cc(CCCNC(=O)C)ccc1O)C (TTD:D07ZQU)	COc1cc(CCCNC(=O)C)ccc1O	223.268	1.8604	12	TTD:D07ZQU
D-04623	Oc1c(CCCNC(=O)C)cc(OC)cc1 (TTD:D0F6VI)	COc1ccc(c(c1)CCCNC(=O)C)O	223.268	1.8604	12	TTD:D0F6VI
D-04625	O(c1cc2c(CC(=C2)c2cccnc2)cc1)C (TTD:D0D8YE)	COc1ccc2c(c1)C=C(C2)c1cccnc1	223.27	3.1869	15	TTD:D0D8YE
D-04627	COc1cccc(c1)C#Cc1cccc(n1)C (IUPHAR:1425)|COc1cccc(c1)C#Cc1cccc(n1)C (IUPHAR:3344)|O(c1cc(ccc1)C#Cc1nc(ccc1)C)C (TTD:D05STO)|O(c1cc(ccc1)C#Cc1nc(ccc1)C)C (TTD:D0C2FM)	COc1cccc(c1)C#Cc1cccc(n1)C	223.27	2.7984	15	IUPHAR:1425|IUPHAR:3344|TTD:D05STO|TTD:D0C2FM	[<sup>3</sup>H]M-MPEP (IUPHAR:1425)|methoxy-MPEP (IUPHAR:3344)|[3H]M-MPEP (TTD:D0C2FM)	Labelled; Radioactive (IUPHAR:1425)			Synthetic organic (IUPHAR:1425)|Synthetic organic (IUPHAR:3344)
D-04629	O=C(c1cc2c3c([nH]c2cc1)cc(cc3)C)C (TTD:D0M7KF)	Cc1ccc2c(c1)[nH]c1c2cc(cc1)C(=O)C	223.27	3.8321	15	TTD:D0M7KF
D-04631	O=C1CCc2c(C1)ccc(c2)c1cccnc1 (TTD:D07WLT)	O=C1CCc2c(C1)ccc(c2)c1cccnc1	223.27	2.8064	15	TTD:D07WLT
D-04634	n1c(CCC)cc(nc1C#N)c1ccccc1 (TTD:D0B2FE)	CCCc1nc(C#N)nc(c1)c1ccccc1	223.273	2.96778	14	TTD:D0B2FE
D-04635	n1(N(c2ccncc2)C)c2c(cc1)cccc2 (TTD:D0R1XT)	CN(n1ccc2c1cccc2)c1ccncc1	223.273	2.9358	14	TTD:D0R1XT
D-04636	N#Cc1ccc(cc1)C1CCCc2n1cnc2 (IUPHAR:8311)|c1(ccc(cc1)C#N)C1n2c(CCC1)cnc2.Cl (KEGG:D02451)|C1CCc2n(C1c1ccc(cc1)C#N)cnc2.Cl.O.C1C(n2c(cnc2)CC1)c1ccc(cc1)C#N.Cl (KEGG:D03778)|c1(ccc(cc1)C#N)C1n2c(CCC1)cnc2 (KEGG:D07940)|n12C(CCCc1cnc2)c1ccc(cc1)C#N (TTD:D0ZX1P)	N#Cc1ccc(cc1)C1CCCc2n1cnc2	223.273	2.68048	14	IUPHAR:8311|KEGG:D02451|KEGG:D03778|KEGG:D07940|TTD:D0ZX1P	fadrozole (IUPHAR:8311)|Fadrozole hydrochloride (USAN) (KEGG:D02451)|Fadrozole hydrochloride hydrate (JAN) (KEGG:D03778)|Fadrozole (INN) (KEGG:D07940)	Approved (IUPHAR:8311)	102676-31-3 (KEGG:D02451)|102676-47-1 (KEGG:D07940)		Synthetic organic (IUPHAR:8311)|Antineoplastic, Estrogen biosynthesis inhibitor (KEGG:D02451)|Antineoplastic, Estrogen biosynthesis inhibitor (KEGG:D03778)|Antineoplastic, Estrogen biosynthesis inhibitor (KEGG:D07940)|Breast cancer (TTD:D0ZX1P)
D-04637	n12[C@H](CCCc1cnc2)c1ccc(cc1)C#N (TTD:D0JE1I)	N#Cc1ccc(cc1)[C@H]1CCCc2n1cnc2	223.273	2.68048	14	TTD:D0JE1I
D-04639	[nH]1c2c(c(c1C)c1ccncc1)ccc(N)c2 (TTD:D06RQV)	Nc1ccc2c(c1)[nH]c(c2c1ccncc1)C	223.273	3.7017	14	TTD:D06RQV
D-04641	n1(CCc2c3c(nccc3)ccc2)ccnc1 (TTD:D0X8UK)	c1cnc2c(c1)c(ccc2)CCn1cncc1	223.273	2.674	14	TTD:D0X8UK
D-04642	Fc1cc(C(=O)C(NC(C)(C)C)C)ccc1 (TTD:D0J5EF)	Fc1cccc(c1)C(=O)C(NC(C)(C)C)C	223.287	3.1759	13	TTD:D0J5EF
D-04646	CN(C)C(=O)OC1=CC(=CC=C1)[N+](C)(C)C (DrugBank:DB01400)|O=C(N(C)C)Oc1cccc(c1)[N+](C)(C)C (IUPHAR:8993)|c1(cc(ccc1)[N+](C)(C)C)OC(=O)N(C)C.[Br-] (KEGG:D00995)|c1(cc(ccc1)[N+](C)(C)C)OC(=O)N(C)C.S(=O)(=O)(OC)[O-] (KEGG:D00998)|c1(cc(ccc1)[N+](C)(C)C)OC(=O)N(C)C (KEGG:D08261)|O(c1cc([N+](C)(C)C)ccc1)C(=O)N(C)C (TTD:D08USJ)	O=C(N(C)C)Oc1cccc(c1)[N+](C)(C)C	223.291	1.9437	12	DrugBank:DB01400|IUPHAR:8993|KEGG:D00995|KEGG:D00998|KEGG:D08261|TTD:D08USJ	Neostigmine (DrugBank:DB01400)|neostigmine (IUPHAR:8993)|Neostigmine bromide (JAN/USP/INN) (KEGG:D00995)|Neostigmine methylsulfate (JP17/USP) (KEGG:D00998)|Neostigmine (BAN) (KEGG:D08261)|Neostigmine (TTD:D08USJ)	Approved; Vet_approved (DrugBank:DB01400)|Approved (IUPHAR:8993)	59-99-4 (DrugBank:DB01400)|114-80-7 (KEGG:D00995)|51-60-5 (KEGG:D00998)|59-99-4 (KEGG:D08261)	N07AA01; N07AA51; S01EB06 (DrugBank:DB01400)|N07AA01; S01EB06 (KEGG:D00995)|N07AA01; S01EB06 (KEGG:D00998)|N07AA01; S01EB06 (KEGG:D08261)	Neostigmine is used for the symptomatic treatment of myasthenia gravis by improving muscle tone. (DrugBank:DB01400)|Synthetic organic (IUPHAR:8993)|Parasympathomimetic, Acetylcholinesterase inhibitor (KEGG:D00995)|Parasympathomimetic, Acetylcholinesterase inhibitor (KEGG:D00998)|Acetylcholinesterase inhibitor (KEGG:D08261)|Myasthenia gravis (TTD:D08USJ)
D-04649	CCC1=CC(OC)=C(CC(C)N)C=C1OC (DrugBank:DB01467)|O(c1c(CC(N)C)cc(OC)c(c1)CC)C (TTD:D0ZQ3Q)	COc1cc(CC)c(cc1CC(N)C)OC	223.311	2.8562	13	DrugBank:DB01467|TTD:D0ZQ3Q	2,5-Dimethoxy-4-ethylamphetamine (DrugBank:DB01467)	Experimental; Illicit (DrugBank:DB01467)	22004-32-6 (DrugBank:DB01467)
D-04650	[nH]1c2c(c3c1cccc3)ccc(C(C)(C)C)c2 (TTD:D09MSF)	CC(c1ccc2c(c1)[nH]c1c2cccc1)(C)C	223.313	4.6186	16	TTD:D09MSF
D-04651	[nH]1c2c(cc(C(C)(C)C)cc2)c2c1cccc2 (TTD:D09PLT)	CC(c1ccc2c(c1)c1ccccc1[nH]2)(C)C	223.313	4.6186	16	TTD:D09PLT
D-04655	NCCC1c2c(Cc3c1cccc3)cccc2 (TTD:D05YFZ)	NCCC1c2ccccc2Cc2c1cccc2	223.313	3.7718	16	TTD:D05YFZ
D-04656	Nc1ccc(CC2CCc3c2cccc3)cc1 (TTD:D0X1IU)	Nc1ccc(cc1)CC1CCc2c1cccc2	223.313	4.1225	16	TTD:D0X1IU
D-04661	S1C(CNCC1)c1ccc(OCC)cc1 (TTD:D0J0QW)	CCOc1ccc(cc1)C1SCCNC1	223.334	2.7916	12	TTD:D0J0QW
D-04663	SCCCCCC(=O)Nc1ccccc1 (TTD:D0B3ZM)	SCCCCCC(=O)Nc1ccccc1	223.334	3.1883	12	TTD:D0B3ZM
D-04665	S(CCCC)c1ccc(C[C@@H](N)C)cc1 (TTD:D0Z0ZU)	CCCCSc1ccc(cc1)C[C@@H](N)C	223.378	4.1688	13	TTD:D0Z0ZU
D-04670	Clc1ccc(C2CCC(=O)N(C2)C)cc1 (TTD:D0JH9F)	Clc1ccc(cc1)C1CCC(=O)N(C1)C	223.699	2.6137	12	TTD:D0JH9F
D-04671	Clc1cc(C(=O)C(NC2CC2)C)ccc1 (TTD:D07SAA)	Clc1cccc(c1)C(=O)C(NC1CC1)C	223.699	3.0541	12	TTD:D07SAA
D-04672	Clc1ccc(C(C2NCCCC2)C)cc1 (TTD:D0Y1MJ)	Clc1ccc(cc1)C(C1CCCCN1)C	223.742	3.9144	13	TTD:D0Y1MJ
D-04677	O=c1snc(o1)c1cccc(c1)[N+](=O)[O-] (IUPHAR:8649)|s1nc(oc1=O)c1cc([N+](=O)[O-])ccc1 (TTD:D0K7CX)	O=c1snc(o1)c1cccc(c1)N(=O)=O	224.193	2.1947	8	IUPHAR:8649|TTD:D0K7CX	HT1042 (IUPHAR:8649)				Synthetic organic (IUPHAR:8649)
D-04679	CCCNc1ccc(cc1[N+](=O)[O-])C(=O)O (IUPHAR:5801)|OC(=O)c1cc([N+](=O)[O-])c(NCCC)cc1 (TTD:D0K3LQ)	CCCNc1ccc(cc1N(=O)=O)C(=O)O	224.213	2.7111	10	IUPHAR:5801|TTD:D0K3LQ	4-(<i>n</i>-propyl)amino-3-nitrobenzoic acid (IUPHAR:5801)|4-(n-propyl)amino-3-nitrobenzoic acid (TTD:D0K3LQ)				Synthetic organic (IUPHAR:5801)
D-04681	CC1=CN([C@@H]2O[C@H](CO)C=C2)C(=O)NC1=O (DrugBank:DB00649)|[C@@H]1(n2c(=O)[nH]c(=O)c(c2)C)O[C@@H](C=C1)CO (KEGG:D00445)|O1[C@@H](n2cc(c(=O)[nH]c2=O)C)C=C[C@H]1CO (TTD:D0Z8EX)	Cc1cn([C@@H]2O[C@@H](C=C2)CO)c(=O)[nH]c1=O	224.213	-0.7091	10	DrugBank:DB00649|KEGG:D00445|TTD:D0Z8EX	Stavudine (DrugBank:DB00649)|Stavudine (USAN/INN) (KEGG:D00445)|Stavudine (TTD:D0Z8EX)	Approved; Investigational (DrugBank:DB00649)	3056-17-5 (DrugBank:DB00649)|3056-17-5 (KEGG:D00445)	J05AF04; J05AR07 (DrugBank:DB00649)|J05AF04 (KEGG:D00445)	For the treatment of human immunovirus (HIV) infections. (DrugBank:DB00649)|Antiviral, Reverse transcriptase inhibitor (KEGG:D00445)|Human immunodeficiency virus infection (TTD:D0Z8EX)
D-04682	O(c1ccc(C(=O)NCC(=O)NO)cc1)C (TTD:D0P2OA)	ONC(=O)CNC(=O)c1ccc(cc1)OC	224.213	0.7122	10	TTD:D0P2OA
D-04685	[O-][N+]1=C(c2ccccn2)C(=O)c2c1cccc2.Cc1ccc(cc1)S(=O)(=O)O (IUPHAR:1729)|S(=O)(=O)(O)c1ccc(cc1)C.[O-][N+]1=C(C(=O)c2c1cccc2)c1ncccc1 (TTD:D04DBR)	O=N1=C(c2ccccn2)C(=O)c2c1cccc2	224.215	1.8678	13	IUPHAR:1729|TTD:D04DBR	2,2'-pyridylisatogen tosylate (IUPHAR:1729)				Synthetic organic (IUPHAR:1729)
D-04690	O=C(c1ccc(cc1)C)C(=O)c1ccccc1 (TTD:D0B8YX)	Cc1ccc(cc1)C(=O)C(=O)c1ccccc1	224.255	3.0606	15	TTD:D0B8YX
D-04693	O=C1CC(Oc2c1cccc2)c1ccccc1 (IUPHAR:408)|O1C(CC(=O)c2c1cccc2)c1ccccc1 (TTD:D0B4VE)|O1C(CC(=O)c2c1cccc2)c1ccccc1 (TTD:D0L3CJ)	O=C1CC(Oc2c1cccc2)c1ccccc1	224.255	3.3931	15	IUPHAR:408|TTD:D0B4VE|TTD:D0L3CJ	flavanone (IUPHAR:408)				Synthetic organic (IUPHAR:408)
D-04699	O(c1c(n2ccnc2)cc2c(c1)cccc2)C (TTD:D03KLN)	COc1cc2ccccc2cc1n1cncc1	224.258	3.0341	14	TTD:D03KLN
D-04700	O(c1cc2c(cc(n3ccnc3)cc2)cc1)C (TTD:D0M9VK)	COc1ccc2c(c1)ccc(c2)n1cncc1	224.258	3.0341	14	TTD:D0M9VK
D-04701	O(c1cc2ncn(c2cc1)c1ccccc1)C (TTD:D02XKJ)	COc1ccc2c(c1)ncn2c1ccccc1	224.258	3.0341	14	TTD:D02XKJ
D-04704	O=c1n([nH]c2c1cccc2)Cc1ccccc1 (TTD:D0J7YU)	O=c1n(Cc2ccccc2)[nH]c2c1cccc2	224.258	2.3779	14	TTD:D0J7YU
D-04706	[nH]1nc(N)c2c(c3ccc(N)cc3)cccc12 (TTD:D0Y9GK)	Nc1ccc(cc1)c1cccc2c1c(N)n[nH]2	224.261	3.5567	13	TTD:D0Y9GK
D-04707	FC(F)(F)C(=O)CCCCCCCCC (TTD:D00ULT)	CCCCCCCCCC(=O)C(F)(F)F	224.263	4.2585	11	TTD:D00ULT
D-04709	S(CC(=O)Nc1c(cccc1)C)C(=O)N (TTD:D0O9BS)	O=C(Nc1ccccc1C)CSC(=O)N	224.279	2.5187	10	TTD:D0O9BS
D-04712	N#Cc1cccc(c1)C#Cc1csc(n1)C (IUPHAR:1428)|s1c(nc(c1)C#Cc1cc(ccc1)C#N)C (TTD:D08DTQ)|s1c(nc(c1)C#Cc1cc(ccc1)C#N)C (TTD:D0P0RY)	N#Cc1cccc(c1)C#Cc1csc(n1)C	224.281	2.72298	13	IUPHAR:1428|TTD:D08DTQ|TTD:D0P0RY	MTEB (IUPHAR:1428)				Synthetic organic (IUPHAR:1428)
D-04713	[Cl-].[n+]1(c2c(cc3c1cc(N)cc3)ccc(N)c2)C.n1c2c(cc3c1cc(N)cc3)ccc(N)c2 (TTD:D0N3NL)	Nc1ccc2c(c1)[n+](C)c1c(c2)ccc(c1)N	224.281	3.1443	14	TTD:D0N3NL					Human immunodeficiency virus infection (TTD:D0N3NL)
D-04715	CC1=CC(\C=C\C2=CC=CC=C2)=CC(C)=C1O (DrugBank:DB08100)	Cc1cc(/C=C/c2ccccc2)cc(c1O)C	224.298	4.1794	16	DrugBank:DB08100	2,6-dimethyl-4-[(E)-2-phenylethenyl]phenol (DrugBank:DB08100)	Experimental (DrugBank:DB08100)
D-04719	[nH]1c(Cc2cc(ccc2)C#CCCC)cnc1 (TTD:D01DAU)	CCCC#Cc1cccc(c1)Cc1cnc[nH]1	224.301	3.1521	15	TTD:D01DAU
D-04721	s1c(c2ccsc2)cc(N)c1C(=O)N (TTD:D0T6VA)	NC(=O)c1sc(cc1N)c1cscc1	224.303	3.4392	9	TTD:D0T6VA
D-04723	SCCCC(Cc1ccccc1)C(=O)O (TTD:D0B9YO)	SCCCC(C(=O)O)Cc1ccccc1	224.319	2.6399	12	TTD:D0B9YO
D-04726	O=C(NC1CCCCC1)NC1CCCCC1 (TTD:D0RX9W)	O=C(NC1CCCCC1)NC1CCCCC1	224.342	3.7328	13	TTD:D0RX9W
D-04729	NCCOB(c1ccccc1)c1ccccc1 (IUPHAR:2433)|O(CCN)B(c1ccccc1)c1ccccc1 (TTD:D00HCI)	NCCOB(c1ccccc1)c1ccccc1	225.094	1.4679	14	IUPHAR:2433|TTD:D00HCI	2-APB (IUPHAR:2433)|2-APB (TTD:D00HCI)				Synthetic organic (IUPHAR:2433)
D-04740	P(=O)(O)(O)CCCCCC(N)C(=O)O (TTD:D0OZ2F)	NC(C(=O)O)CCCCCP(=O)(O)O	225.179	0.8367	7	TTD:D0OZ2F
D-04742	Fc1c([nH]c(=O)[nH]c1=O)Cn1c(ncc1)N (TTD:D01DAQ)	O=c1[nH]c(=O)c(c([nH]1)Cn1ccnc1N)F	225.18	-0.3895	8	TTD:D01DAQ
D-04743	Cl.O1[C@@H]([C@H]([C@H]2[C@@H]1n1c(O2)nc(=N)cc1)O)CO (KEGG:D01651)	OC[C@H]1O[C@@H]2[C@H]([C@@H]1O)Oc1n2ccc(=N)n1	225.201	-1.5261	9	KEGG:D01651	Ancitabine hydrochloride (JAN) (KEGG:D01651)		10212-25-6 (KEGG:D01651)		Antineoplastic, Antimetabolite (KEGG:D01651)
D-04754	O(c1cc(c2c(O)cccc2)ccc1C#N)C (TTD:D02ZEE)	COc1cc(ccc1C#N)c1ccccc1O	225.243	2.93948	14	TTD:D02ZEE
D-04755	o1c(cc2c1ccc(O)c2)c1ccc(N)cc1 (TTD:D0I9NH)	Nc1ccc(cc1)c1cc2c(o1)ccc(c2)O	225.243	3.9688	14	TTD:D0I9NH
D-04756	O(/N=C/c1ccccc1)C(=O)c1ccccc1 (TTD:D0A1SO)	O=C(c1ccccc1)O/N=C/c1ccccc1	225.243	2.8775	14	TTD:D0A1SO
D-04757	OC(=O)c1ccc(/N=C/c2ccccc2)cc1 (TTD:D0K4IH)	OC(=O)c1ccc(cc1)/N=C/c1ccccc1	225.243	3.1354	14	TTD:D0K4IH
D-04760	n1(c2cc(ccc2O)C)nc2c(n1)cccc2 (KEGG:D03913)	Cc1ccc(c(c1)n1nc2c(n1)cccc2)O	225.246	2.4345	13	KEGG:D03913	Drometrizole (USAN/INN) (KEGG:D03913)		2440-22-4 (KEGG:D03913)		Ultraviolet screen (KEGG:D03913)
D-04761	O=c1n([nH]c2c1cccc2)Cc1ncccc1 (TTD:D05KCN)	O=c1n(Cc2ccccn2)[nH]c2c1cccc2	225.246	1.7729	13	TTD:D05KCN
D-04762	O=c1n([nH]c2c1cccc2)Cc1cccnc1 (TTD:D0HZ9X)|O=c1n([nH]c2c1cccc2)Cc1cccnc1 (TTD:D0K7RV)	O=c1n(Cc2cccnc2)[nH]c2c1cccc2	225.246	1.7729	13	TTD:D0HZ9X|TTD:D0K7RV
D-04763	O=c1n([nH]c2c1cccc2)Cc1ccncc1 (TTD:D0Z5XD)	O=c1n(Cc2ccncc2)[nH]c2c1cccc2	225.246	1.7729	13	TTD:D0Z5XD
D-04765	n1(Cc2ccccc2)c2ncnc(N)c2nc1 (TTD:D0S4JI)	Nc1ncnc2c1ncn2Cc1ccccc1	225.249	2.038	12	TTD:D0S4JI
D-04766	Fc1cc2CC/C(=C/c3cccnc3)/c2cc1 (TTD:D0M7FS)	Fc1ccc2c(c1)CC/C/2=C/c1cccnc1	225.261	3.7075	15	TTD:D0M7FS
D-04767	Fc1cc2CC/C(=C/c3ccncc3)/c2cc1 (TTD:D09HOE)	Fc1ccc2c(c1)CC/C/2=C/c1ccncc1	225.261	3.7075	15	TTD:D09HOE
D-04768	Fc1cc2CC/C(=C\c3cccnc3)/c2cc1 (TTD:D0V8CR)	Fc1ccc2c(c1)CC/C/2=C\c1cccnc1	225.261	3.7075	15	TTD:D0V8CR
D-04769	Fc1cc2CC/C(=C\c3ccncc3)/c2cc1 (TTD:D03MKT)	Fc1ccc2c(c1)CC/C/2=C\c1ccncc1	225.261	3.7075	15	TTD:D03MKT
D-04770	Fc1c2CC/C(=C/c3cccnc3)/c2ccc1 (TTD:D0L1JF)	Fc1cccc2c1CC/C/2=C/c1cccnc1	225.261	3.7075	15	TTD:D0L1JF
D-04771	Fc1c2CC/C(=C\c3cccnc3)/c2ccc1 (TTD:D04QPK)	Fc1cccc2c1CC/C/2=C\c1cccnc1	225.261	3.7075	15	TTD:D04QPK
D-04776	COC1=CC(CC(C)N)=CC(OC)=C1OC (DrugBank:DB01516)	COc1cc(CC(N)C)cc(c1OC)OC	225.284	2.3024	12	DrugBank:DB01516	3,4,5-Trimethoxyamphetamine (DrugBank:DB01516)	Experimental; Illicit (DrugBank:DB01516)	1082-88-8 (DrugBank:DB01516)
D-04777	CC(C)(C)NCC(O)C1=CC(O)=CC(O)=C1 (DrugBank:DB00871)|OC(c1cc(O)cc(c1)O)CNC(C)(C)C (IUPHAR:560)|c1(C(CNC(C)(C)C)O)cc(cc(c1)O)O.S(=O)(=O)(O)O.c1(C(CNC(C)(C)C)O)cc(cc(c1)O)O (KEGG:D00688)|c1(C(CNC(C)(C)C)O)cc(cc(c1)O)O (KEGG:D08570)|OC(CNC(C)(C)C)c1cc(O)cc(O)c1 (TTD:D0M8RC)	OC(c1cc(O)cc(c1)O)CNC(C)(C)C	225.284	1.9102	12	DrugBank:DB00871|IUPHAR:560|KEGG:D00688|KEGG:D08570|TTD:D0M8RC	Terbutaline (DrugBank:DB00871)|terbutaline (IUPHAR:560)|Terbutaline sulfate (JP17/USP) (KEGG:D00688)|Terbutaline (INN) (KEGG:D08570)|Terbutaline (TTD:D0M8RC)	Approved (DrugBank:DB00871)|Approved (IUPHAR:560)	23031-25-6 (DrugBank:DB00871)|23031-32-5 (KEGG:D00688)|23031-25-6 (KEGG:D08570)	R03AC03; R03CC03; R03CC53 (DrugBank:DB00871)|R03AC03; R03CC03 (KEGG:D00688)|R03AC03; R03CC03 (KEGG:D08570)	For the prevention and reversal of bronchospasm in patients 12 years of age and older with reversible, obstructive airway disease, as well as symptomatic management of reversible bronchospasm associated with bronchitis and emphysema. Also used acute IV and sub-Q therapy in selected women to inhibit uterine contractions in preterm labor (tocolysis) and prolong gestation when beneficial. (DrugBank:…
D-04781	O(c1cc(/C=C/c2ccc(N)cc2)ccc1)C (TTD:D07UVN)	COc1cccc(c1)/C=C/c1ccc(cc1)N	225.286	4.029	15	TTD:D07UVN
D-04782	O([C@H]1C[C@@H](N)c2c1cccc2)c1ccccc1 (TTD:D0B5AG)	N[C@@H]1C[C@@H](c2c1cccc2)Oc1ccccc1	225.286	3.9105	15	TTD:D0B5AG
D-04783	N[C@H]1C[C@@H]1c1ccc(cc1)c1cccc(c1)O (IUPHAR:7023)|Oc1cc(c2ccc([C@@H]3[C@@H](N)C3)cc2)ccc1 (TTD:D0C8SX)	N[C@H]1C[C@@H]1c1ccc(cc1)c1cccc(c1)O	225.286	3.5741	15	IUPHAR:7023|TTD:D0C8SX	OG-L002 (IUPHAR:7023)				Synthetic organic (IUPHAR:7023)
D-04785	OC1CCc2c(C1)ccc(c2)c1cccnc1 (TTD:D02ZQM)	OC1CCc2c(C1)ccc(c2)c1cccnc1	225.286	2.5982	15	TTD:D02ZQM
D-04786	O(CCCc1[nH]cnc1)C(=O)N[C@@H](CC)C (TTD:D0C8IB)	C[C@@H](NC(=O)OCCCc1cnc[nH]1)CC	225.287	2.2579	11	TTD:D0C8IB
D-04787	O(CCCc1[nH]cnc1)C(=O)N[C@H](CC)C (TTD:D0H4ID)	C[C@H](NC(=O)OCCCc1cnc[nH]1)CC	225.287	2.2579	11	TTD:D0H4ID
D-04788	s1c(c2sccc2)ccc1C(=O)NO (TTD:D0PP3Q)	ONC(=O)c1ccc(s1)c1cccs1	225.287	2.9865	9	TTD:D0PP3Q
D-04789	n1(c2c(c(c1)Cn1ccnc1)cccc2)CC (TTD:D05VAN)	CCn1cc(c2c1cccc2)Cn1cncc1	225.289	2.906	14	TTD:D05VAN
D-04790	n1(c2c(cc1)ccc1ncccc21)C[C@@H](N)C (TTD:D0M1YU)	C[C@@H](Cn1ccc2c1c1cccnc1cc2)N	225.289	3.237	14	TTD:D0M1YU
D-04791	NC1CC(CC1)c1c2c([nH]c1)ccc(c2)C#N (TTD:D05REQ)	N#Cc1ccc2c(c1)c(c[nH]2)C1CCC(C1)N	225.289	3.33468	14	TTD:D05REQ
D-04792	Nc1cc(cc(N)c1)/C=C/c1ccc(N)cc1 (TTD:D03FBI)	Nc1ccc(cc1)/C=C/c1cc(N)cc(c1)N	225.289	4.3472	14	TTD:D03FBI
D-04793	n1(CCC2=CCCc3ncccc23)ccnc1 (TTD:D04ZGF)	c1cnc2c(c1)C(=CCC2)CCn1cncc1	225.289	2.698	14	TTD:D04ZGF
D-04796	N1(CCCC1)CCc1cc2c(cc1)cccc2 (TTD:D0I4BC)	C1CCN(C1)CCc1ccc2c(c1)cccc2	225.329	3.416	16	TTD:D0I4BC
D-04797	N(CC(c1ccccc1)c1ccccc1)(C)C (TTD:D01HJZ)	CN(CC(c1ccccc1)c1ccccc1)C	225.329	3.3801	16	TTD:D01HJZ
D-04799	N(CCC(c1ccccc1)c1ccccc1)C (TTD:D02GNN)	CNCCC(c1ccccc1)c1ccccc1	225.329	3.8189	16	TTD:D02GNN
D-04800	NCCCC(c1ccccc1)c1ccccc1 (TTD:D04SCQ)	NCCCC(c1ccccc1)c1ccccc1	225.329	4.2577	16	TTD:D04SCQ
D-04806	Clc1cc(C(=O)C(NC(C)C)C)ccc1 (TTD:D02EKR)	CC(NC(C(=O)c1cccc(c1)Cl)C)C	225.715	3.3001	12	TTD:D02EKR
D-04808	P(=O)(O)(O)CC(CCC(=O)O)C(=O)O (TTD:D0F3ZO)|P(=O)(O)(O)CC(CCC(=O)O)C(=O)O (TTD:D0Y6UB)	OC(=O)CCC(C(=O)O)CP(=O)(O)O	226.121	-0.2703	6	TTD:D0F3ZO|TTD:D0Y6UB
D-04821	OC1=CC=C(C=C1)C1=CC2=C(O1)C=CC(O)=C2 (DrugBank:DB07032)|o1c(cc2c1ccc(O)c2)c1ccc(O)cc1 (TTD:D01WCA)|o1c(cc2c1ccc(O)c2)c1ccc(O)cc1 (TTD:D0W5GK)	Oc1ccc(cc1)c1oc2c(c1)cc(cc2)O	226.227	3.511	14	DrugBank:DB07032|TTD:D01WCA|TTD:D0W5GK	2-(4-HYDROXY-PHENYL)BENZOFURAN-5-OL (DrugBank:DB07032)	Experimental (DrugBank:DB07032)
D-04822	o1c2c(c3c(c1=O)cccc3)ccc(O)c2C (TTD:D0WP6A)	Oc1ccc2c(c1C)oc(=O)c1c2cccc1	226.227	2.9602	14	TTD:D0WP6A
D-04823	OC1=CC=CC2=C1C(=O)C1=C(O)C=CC=C1C2 (DrugBank:DB11157)|c12c(Cc3c(C1=O)c(ccc3)O)cccc2O (KEGG:D00233)	Oc1cccc2c1C(=O)c1c(C2)cccc1O	226.227	2.233	14	DrugBank:DB11157|KEGG:D00233	Anthralin (DrugBank:DB11157)|Anthralin (USP) (KEGG:D00233)	Approved (DrugBank:DB11157)	1143-38-0 (DrugBank:DB11157)|1143-38-0 480-22-8 (KEGG:D00233)	D05AC01; D05AC51 (DrugBank:DB11157)|D05AC01 (KEGG:D00233)	Stable plaque psoriasis of the skin and scalp [L1933]. It is also used topically in the management of psoriasis, dermatoses, and alopecia areata. Anthralin is also used in biomedical research due to its effect on EGFR autophosphorylation [L1936]. (DrugBank:DB11157)|Antipsoriatic (KEGG:D00233)
D-04828	C[C@@](CC1=CC(O)=C(O)C=C1)(NN)C(O)=O (DrugBank:DB00190)|NN[C@](C(=O)O)(Cc1ccc(c(c1)O)O)C (IUPHAR:5159)|O.c1(c(ccc(c1)C[C@@](C(=O)O)(NN)C)O)O (KEGG:D00558)|OC(=O)[C@@](NN)(Cc1cc(O)c(O)cc1)C (TTD:D0P7JZ)	NN[C@](C(=O)O)(Cc1ccc(c(c1)O)O)C	226.229	1.0381	10	DrugBank:DB00190|IUPHAR:5159|KEGG:D00558|TTD:D0P7JZ	Carbidopa (DrugBank:DB00190)|carbidopa (IUPHAR:5159)|Carbidopa (USP) (KEGG:D00558)|Carbidopa (TTD:D0P7JZ)	Approved (DrugBank:DB00190)|Approved (IUPHAR:5159)	28860-95-9 (DrugBank:DB00190)|38821-49-7 (KEGG:D00558)		Carbidopa is indicated with [levodopa] for the treatment of symptoms of idiopathic Parkinson disease, postencephalitic parkinsonism and symptomatic parkinsonism followed by carbon monoxide or manganese intoxication.[FDA label] The combination therapy is administered for the reduction of [levodopa]-driven nausea and vomiting.[FDA label] The product of carbidopa should be used in patients where the…
D-04830	O(C(=O)c1ncc2[nH]c3c(c2c1)cccc3)C (TTD:D0J0CA)	COC(=O)c1ncc2c(c1)c1ccccc1[nH]2	226.231	2.5027	13	TTD:D0J0CA
D-04832	O=c1[nH]c(=O)c2c1c1c(CCC1)c1[nH]ccc21 (TTD:D0NU5Z)	O=c1[nH]c(=O)c2c1c1cc[nH]c1c1c2CCC1	226.231	1.2961	13	TTD:D0NU5Z
D-04833	o1c2c(c(Cn3ccnc3)cc1=O)cccc2 (TTD:D0M5EW)	O=c1cc(Cn2cncc2)c2c(o1)cccc2	226.231	2.0378	13	TTD:D0M5EW
D-04834	o1c2cc(Cn3ccnc3)ccc2ccc1=O (TTD:D0OY1J)	O=c1ccc2c(o1)cc(cc2)Cn1cncc1	226.231	2.0378	13	TTD:D0OY1J
D-04835	o1c2cc(Cn3ccnc3)ccc2c(=O)cc1 (TTD:D0DJ3R)	O=c1ccoc2c1ccc(c2)Cn1cncc1	226.231	2.0378	13	TTD:D0DJ3R
D-04840	Fc1cc2CC/C(=C/c3cncnc3)/c2cc1 (TTD:D04REX)	Fc1ccc2c(c1)CC/C/2=C/c1cncnc1	226.249	3.1025	14	TTD:D04REX
D-04841	Fc1cc2CC/C(=C\c3cncnc3)/c2cc1 (TTD:D06HFV)	Fc1ccc2c(c1)CC/C/2=C\c1cncnc1	226.249	3.1025	14	TTD:D06HFV
D-04842	Fc1cc2c(ccc(Cn3ccnc3)c2)cc1 (TTD:D0P3ND)	Fc1ccc2c(c1)cc(cc2)Cn1cncc1	226.249	3.2237	14	TTD:D0P3ND
D-04843	S(=O)(=O)(NCc1c2c(oc1)cccc2)N (TTD:D0M7DE)	NS(=O)(=O)NCc1coc2c1cccc2	226.252	2.8979	9	TTD:D0M7DE
D-04846	OC(=O)C(c1ccc(cc1)c1ccccc1)C (TTD:D06FTI)|OC(=O)C(c1ccc(cc1)c1ccccc1)C (TTD:D0Y0BQ)	OC(=O)C(c1ccc(cc1)c1ccccc1)C	226.27	3.5417	15	TTD:D06FTI|TTD:D0Y0BQ
D-04851	c1cc(c2c(c1)c(ccn2)CN(C)CC#C)O (TTD:D02AQM)	C#CCN(Cc1ccnc2c1cccc2O)C	226.274	2.0054	14	TTD:D02AQM	VAR-10300 (TTD:D02AQM)				Neurodegenerative disease (TTD:D02AQM)
D-04854	O(c1ncc2[nH]c3c(c2c1)cccc3)CCC (TTD:D08BOP)|O(c1ncc2[nH]c3c(c2c1)cccc3)CCC (TTD:D0J8JS)	CCCOc1ncc2c(c1)c1ccccc1[nH]2	226.274	3.5049	14	TTD:D08BOP|TTD:D0J8JS
D-04857	O=C(Nc1nc(ccc1)C)c1cc(ccc1)C (TTD:D0X4UN)	Cc1cccc(n1)NC(=O)c1cccc(c1)C	226.274	3.0237	14	TTD:D0X4UN
D-04858	O=C(Nc1ccc(c2ccc(cc2)C)cc1)N (TTD:D08RMK)	NC(=O)Nc1ccc(cc1)c1ccc(cc1)C	226.274	3.9259	14	TTD:D08RMK
D-04859	CC(C)(C(=O)C1=CN=CC=C1)C1=CC=CN=C1 (DrugBank:DB01011)|O=C(C(c1cccnc1)(C)C)c1cccnc1 (IUPHAR:5224)|c1ncc(cc1)C(=O)C(c1cccnc1)(C)C (KEGG:D00410)|c1ncc(cc1)C(=O)C(c1cccnc1)(C)C.[C@@H]([C@H](C(=O)O)O)(C(=O)O)O.[C@@H]([C@H](C(=O)O)O)(C(=O)O)O (KEGG:D05019)|O=C(C(c1cccnc1)(C)C)c1cccnc1 (TTD:D0Q9JT)	O=C(C(c1cccnc1)(C)C)c1cccnc1	226.274	2.6371	14	DrugBank:DB01011|IUPHAR:5224|KEGG:D00410|KEGG:D05019|TTD:D0Q9JT	Metyrapone (DrugBank:DB01011)|metyrapone (IUPHAR:5224)|Metyrapone (JP17/USP/INN) (KEGG:D00410)|Metyrapone tartrate (USAN) (KEGG:D05019)|Metyrapone (TTD:D0Q9JT)	Approved; Investigational (DrugBank:DB01011)|Approved (IUPHAR:5224)	54-36-4 (DrugBank:DB01011)|54-36-4 (KEGG:D00410)|908-35-0 (KEGG:D05019)	V04CD01 (DrugBank:DB01011)|V04CD01 (KEGG:D00410)|V04CD01 (KEGG:D05019)	Used as a diagnostic drug for testing hypothalamic-pituitary ACTH function. Occasionally used in Cushing's syndrome. (DrugBank:DB01011)|Synthetic organic (IUPHAR:5224)|Diagnostic aid (pituitary function determination) (KEGG:D00410)|Diagnostic aid (pituitary function determination) (KEGG:D05019)|Cushing's disease (TTD:D0Q9JT)
D-04861	s1c(nc(c1)C#Cc1cc(cnc1)C=C)C (TTD:D0CQ6I)	C=Cc1cncc(c1)C#Cc1csc(n1)C	226.297	2.8893	13	TTD:D0CQ6I
D-04863	S(=O)(=O)(Nc1sc(SC)nn1)N (TTD:D04PSK)	CSc1nnc(s1)NS(=O)(=O)N	226.3	1.7295	3	TTD:D04PSK
D-04867	CC(C)NC1=CC=C(NC2=CC=CC=C2)C=C1 (DrugBank:DB14195)	CC(Nc1ccc(cc1)Nc1ccccc1)C	226.317	4.3965	15	DrugBank:DB14195	4-(Isopropylamino)diphenylamine (DrugBank:DB14195)	Approved; Experimental (DrugBank:DB14195)	101-72-4 (DrugBank:DB14195)		4-(Isopropylamino)diphenylamine is approved for use within allergenic epicutaneous patch tests which are indicated for use as an aid in the diagnosis of allergic contact dermatitis (ACD) in persons 6 years of age and older. (DrugBank:DB14195)
D-04868	Cc1cc(nc2c1cccc2)N1CCCCC1 (IUPHAR:4255)|N1(CCCCC1)c1nc2c(c(c1)C)cccc2 (TTD:D0G8FT)	Cc1cc(nc2c1cccc2)N1CCCCC1	226.317	3.5985	15	IUPHAR:4255|TTD:D0G8FT	ML204 (IUPHAR:4255)				Synthetic organic (IUPHAR:4255)
D-04874	CC1=C(SSC1=S)C1=CN=CC=N1 (DrugBank:DB12539)|c1(c(c(=S)ss1)C)c1nccnc1 (TTD:D0W4NM)	S=c1ssc(c1C)c1cnccn1	226.342	3.3045	8	DrugBank:DB12539|TTD:D0W4NM	Oltipraz (DrugBank:DB12539)|Oltipraz (TTD:D0W4NM)	Investigational (DrugBank:DB12539)	64224-21-1 (DrugBank:DB12539)		Cancer (TTD:D0W4NM)
D-04877	Clc1cc(c(OCC(=O)O)cc1)CC=C (TTD:D0E0HT)	C=CCc1cc(Cl)ccc1OCC(=O)O	226.656	2.5319	11	TTD:D0E0HT
D-04878	C[C@@H](Cn1ccc2c1cc(Cl)c(c2)F)N (IUPHAR:166)|Clc1cc2n(C[C@@H](N)C)ccc2cc1F (TTD:D0B4BN)	C[C@@H](Cn1ccc2c1cc(Cl)c(c2)F)N	226.678	3.4813	11	IUPHAR:166|TTD:D0B4BN	Ro 60-0175 (IUPHAR:166)|Ro-60-0175 (TTD:D0B4BN)				Synthetic organic (IUPHAR:166)
D-04879	ClC1=C(Cl)C(=O)c2c(C1=O)cccc2 (TTD:D0I2RW)	O=C1C(=C(Cl)C(=O)c2c1cccc2)Cl	227.044	2.7548	10	TTD:D0I2RW
D-04898	o1c2c(ccc(Cn3cnnc3)c2)c(=O)cc1 (TTD:D0L9BT)	O=c1ccoc2c1ccc(c2)Cn1cnnc1	227.219	1.4328	12	TTD:D0L9BT
D-04899	o1c(c2nc(n3nccc3)cc(n2)N)ccc1 (TTD:D08CIY)	Nc1cc(nc(n1)c1ccco1)n1cccn1	227.222	2.0857	11	TTD:D08CIY
D-04903	FC(F)(F)C1=CC2=C(C=C1)[C@H]1C[C@@H]2CNC1 (DrugBank:DB12244)|FC(c1ccc2c(c1)[C@H]1CNC[C@@H]2C1)(F)F (IUPHAR:9056)	FC(c1ccc2c(c1)[C@H]1CNC[C@@H]2C1)(F)F	227.226	3.2083	12	DrugBank:DB12244|IUPHAR:9056	CP-601927 (DrugBank:DB12244)|CP-601927 (IUPHAR:9056)	Investigational (DrugBank:DB12244)	357425-02-6 (DrugBank:DB12244)		Synthetic organic (IUPHAR:9056)
D-04905	FC1=C(C=CC(=C1)C#N)[C@H]1CCC2=CN=CN12 (DrugBank:DB11837)|N#Cc1ccc(c(c1)F)[C@H]1CCc2n1cnc2 (IUPHAR:8310)|c1c(c(ccc1C#N)[C@H]1CCc2n1cnc2)F (KEGG:D11061)|Fc1c([C@@H]2n3c(CC2)cnc3)ccc(c1)C#N (TTD:D03AJU)	N#Cc1ccc(c(c1)F)[C@H]1CCc2n1cnc2	227.237	2.42948	13	DrugBank:DB11837|IUPHAR:8310|KEGG:D11061|TTD:D03AJU	Osilodrostat (DrugBank:DB11837)|osilodrostat (IUPHAR:8310)|Osilodrostat (USAN/INN) (KEGG:D11061)	Investigational (DrugBank:DB11837)	928134-65-0 (DrugBank:DB11837)|928134-65-0 (KEGG:D11061)		Synthetic organic (IUPHAR:8310)|Antihypertensive, Steroid 11-beta-hydroxylase inhibitor (KEGG:D11061)|Cushing's disease (TTD:D03AJU)
D-04908	s1cc(nc1C#C)C#Cc1cc(F)ccc1 (TTD:D03CCP)	C#Cc1scc(n1)C#Cc1cccc(c1)F	227.257	2.6633	13	TTD:D03CCP
D-04912	Oc1cc(/C=C/c2ccc(N)cc2)cc(O)c1 (TTD:D0J4VR)	Nc1ccc(cc1)/C=C/c1cc(O)cc(c1)O	227.259	3.4316	14	TTD:D0J4VR
D-04917	O=C(NO)C(c1ccccc1)c1ccccc1 (TTD:D03QOD)	ONC(=O)C(c1ccccc1)c1ccccc1	227.259	2.7148	14	TTD:D03QOD
D-04920	O=C(NC1=CC(=NN1)C1CC1)C1=CC=CC=C1 (DrugBank:DB02647)	O=C(c1ccccc1)Nc1[nH]nc(c1)C1CC1	227.262	2.6124	13	DrugBank:DB02647	N-(5-Cyclopropyl-1h-Pyrazol-3-Yl)Benzamide (DrugBank:DB02647)	Experimental (DrugBank:DB02647)
D-04923	O(c1cc2c3c([nH]c2cc1)c([n+](cc3)C)C)C (TTD:D00MFR)	COc1ccc2c(c1)c1cc[n+](c(c1[nH]2)C)C	227.282	2.4626	14	TTD:D00MFR
D-04924	O(c1cc2c3c(n(c2cc1)C)c[n+](cc3)C)C (TTD:D0DV9Z)	COc1ccc2c(c1)c1cc[n+](cc1n2C)C	227.282	2.1646	14	TTD:D0DV9Z
D-04925	c1[n+](ccc(c1)C(=O)NCc1ccccc1)C.[I-] (KEGG:D11249)	C[n+]1ccc(cc1)C(=O)NCc1ccccc1	227.282	1.832	14	KEGG:D11249	Enisamium iodide (INN) (KEGG:D11249)		201349-37-3 (KEGG:D11249)	J05AX17 (KEGG:D11249)	Antiviral (KEGG:D11249)
D-04926	Oc1cc2c3c(n(c2cc1)C)c([n+](cc3)C)C (TTD:D0G5TL)	Oc1ccc2c(c1)c1cc[n+](c(c1n2C)C)C	227.282	2.17	14	TTD:D0G5TL
D-04928	s1c(c2ccccc2)cc2ncnc(N)c12 (TTD:D09PLJ)	Nc1ncnc2c1sc(c2)c1ccccc1	227.285	3.5217	12	TTD:D09PLJ
D-04930	N1C=CC(=N1)C1=CN=C(S1)C1=CC=CC=C1 (DrugBank:DB07614)	c1ccc(cc1)c1ncc(s1)c1n[nH]cc1	227.285	3.2002	12	DrugBank:DB07614	PHENYL-5-(1H-PYRAZOL-3-YL)-1,3-THIAZOLE (DrugBank:DB07614)	Experimental (DrugBank:DB07614)
D-04932	O(CC1CCNC1)c1cc2c(cc1)cccc2 (TTD:D0SN6R)	C1NCC(C1)COc1ccc2c(c1)cccc2	227.302	3.1569	15	TTD:D0SN6R
D-04933	O([C@@H]1CCNC1)Cc1cc2c(cc1)cccc2 (TTD:D0XF5P)	C1NC[C@@H](C1)OCc1ccc2c(c1)cccc2	227.302	3.0471	15	TTD:D0XF5P
D-04934	O([C@H]1CCNC1)Cc1cc2c(cc1)cccc2 (TTD:D0E3DM)	C1NC[C@H](C1)OCc1ccc2c(c1)cccc2	227.302	3.0471	15	TTD:D0E3DM
D-04935	O(c1c(CN(C)C)cccc1)c1ccccc1 (TTD:D0VC1K)	CN(Cc1ccccc1Oc1ccccc1)C	227.302	3.5405	15	TTD:D0VC1K
[truncated: 11,167 more rows]

## Sheet: Target information
UniProt AC	Name	Protein family	Gene symbol	Gene ID	Organism	External link
[truncated: 1,844 more rows]

[truncated: 2 more sheets: Local DTI network, Global DTI network]
