# Supplementary material for: wSDTNBI: a novel network-based inference method for virtual screening
Source: Royal Society of Chemistry journal article supplement (doi:10.1039/d1sc05613a), 2021-12-21
Supplement: d1sc05613a2.xlsx [file d1sc05613a2.xlsx]

## Sheet: Prediction results
Drug ID	External link	Name	Target UniProt AC	Gene symbol	wSDTNBI score	Rank
D-00010	IUPHAR:2418|TTD:D0I0AA	acrolein (IUPHAR:2418)	P00748	F12	1.86744	1
D-00010	IUPHAR:2418|TTD:D0I0AA	acrolein (IUPHAR:2418)	P30989	NTSR1	1.76656	2
D-00010	IUPHAR:2418|TTD:D0I0AA	acrolein (IUPHAR:2418)	Q8NER1	TRPV1	1.70991	3
D-00010	IUPHAR:2418|TTD:D0I0AA	acrolein (IUPHAR:2418)	Q7Z2W7	TRPM8	1.67438	4
D-00010	IUPHAR:2418|TTD:D0I0AA	acrolein (IUPHAR:2418)	P23141	CES1	1.52905	5
D-00010	IUPHAR:2418|TTD:D0I0AA	acrolein (IUPHAR:2418)	P29466	CASP1	1.42776	6
D-00010	IUPHAR:2418|TTD:D0I0AA	acrolein (IUPHAR:2418)	O75469	NR1I2	1.35722	7
D-00010	IUPHAR:2418|TTD:D0I0AA	acrolein (IUPHAR:2418)	Q99788	CMKLR1	1.32557	8
D-00010	IUPHAR:2418|TTD:D0I0AA	acrolein (IUPHAR:2418)	Q13563	PKD2	1.32379	9
D-00010	IUPHAR:2418|TTD:D0I0AA	acrolein (IUPHAR:2418)	P14174	MIF	1.28211	10
D-00010	IUPHAR:2418|TTD:D0I0AA	acrolein (IUPHAR:2418)	O60733	PLA2G6	1.27814	11
D-00010	IUPHAR:2418|TTD:D0I0AA	acrolein (IUPHAR:2418)	P16050	ALOX15	1.22031	12
D-00010	IUPHAR:2418|TTD:D0I0AA	acrolein (IUPHAR:2418)	Q99714	HSD17B10	1.21251	13
D-00010	IUPHAR:2418|TTD:D0I0AA	acrolein (IUPHAR:2418)	Q9NUW8	TDP1	1.17379	14
D-00010	IUPHAR:2418|TTD:D0I0AA	acrolein (IUPHAR:2418)	P00352	ALDH1A1	1.16244	Known
D-00010	IUPHAR:2418|TTD:D0I0AA	acrolein (IUPHAR:2418)	Q14790	CASP8	1.09246	15
D-00010	IUPHAR:2418|TTD:D0I0AA	acrolein (IUPHAR:2418)	Q9UNI1	CELA1	1.07196	16
D-00010	IUPHAR:2418|TTD:D0I0AA	acrolein (IUPHAR:2418)	P21980	TGM2	1.07078	17
D-00010	IUPHAR:2418|TTD:D0I0AA	acrolein (IUPHAR:2418)	O00748	CES2	1.0676	18
D-00010	IUPHAR:2418|TTD:D0I0AA	acrolein (IUPHAR:2418)	P14416	DRD2	1.06667	19
D-00010	IUPHAR:2418|TTD:D0I0AA	acrolein (IUPHAR:2418)	Q01469	FABP5	1.00162	20
D-00010	IUPHAR:2418|TTD:D0I0AA	acrolein (IUPHAR:2418)	O75762	TRPA1	0.512092	Known
D-00021	DrugBank:DB02736|IUPHAR:4661|TTD:D0S6KY	Acetamide (DrugBank:DB02736)|acetamide (IUPHAR:4661)|acetamide (TTD:D0S6KY)	P83916	CBX1	2.54883	1
D-00021	DrugBank:DB02736|IUPHAR:4661|TTD:D0S6KY	Acetamide (DrugBank:DB02736)|acetamide (IUPHAR:4661)|acetamide (TTD:D0S6KY)	Q9H9B1	EHMT1	2.1833	2
D-00021	DrugBank:DB02736|IUPHAR:4661|TTD:D0S6KY	Acetamide (DrugBank:DB02736)|acetamide (IUPHAR:4661)|acetamide (TTD:D0S6KY)	P07202	TPO	1.94678	3
D-00021	DrugBank:DB02736|IUPHAR:4661|TTD:D0S6KY	Acetamide (DrugBank:DB02736)|acetamide (IUPHAR:4661)|acetamide (TTD:D0S6KY)	P00918	CA2	1.87052	4
D-00021	DrugBank:DB02736|IUPHAR:4661|TTD:D0S6KY	Acetamide (DrugBank:DB02736)|acetamide (IUPHAR:4661)|acetamide (TTD:D0S6KY)	O43570	CA12	1.85707	5
D-00021	DrugBank:DB02736|IUPHAR:4661|TTD:D0S6KY	Acetamide (DrugBank:DB02736)|acetamide (IUPHAR:4661)|acetamide (TTD:D0S6KY)	P21728	DRD1	1.85466	6
D-00021	DrugBank:DB02736|IUPHAR:4661|TTD:D0S6KY	Acetamide (DrugBank:DB02736)|acetamide (IUPHAR:4661)|acetamide (TTD:D0S6KY)	P05981	HPN	1.63044	7
D-00021	DrugBank:DB02736|IUPHAR:4661|TTD:D0S6KY	Acetamide (DrugBank:DB02736)|acetamide (IUPHAR:4661)|acetamide (TTD:D0S6KY)	Q07820	MCL1	1.48369	8
D-00021	DrugBank:DB02736|IUPHAR:4661|TTD:D0S6KY	Acetamide (DrugBank:DB02736)|acetamide (IUPHAR:4661)|acetamide (TTD:D0S6KY)	Q99714	HSD17B10	1.32498	9
D-00021	DrugBank:DB02736|IUPHAR:4661|TTD:D0S6KY	Acetamide (DrugBank:DB02736)|acetamide (IUPHAR:4661)|acetamide (TTD:D0S6KY)	P03951	F11	1.25664	10
D-00021	DrugBank:DB02736|IUPHAR:4661|TTD:D0S6KY	Acetamide (DrugBank:DB02736)|acetamide (IUPHAR:4661)|acetamide (TTD:D0S6KY)	P14416	DRD2	1.21639	11
D-00021	DrugBank:DB02736|IUPHAR:4661|TTD:D0S6KY	Acetamide (DrugBank:DB02736)|acetamide (IUPHAR:4661)|acetamide (TTD:D0S6KY)	P21918	DRD5	1.18768	12
D-00021	DrugBank:DB02736|IUPHAR:4661|TTD:D0S6KY	Acetamide (DrugBank:DB02736)|acetamide (IUPHAR:4661)|acetamide (TTD:D0S6KY)	Q9HBH1	PDF	1.16116	13
D-00021	DrugBank:DB02736|IUPHAR:4661|TTD:D0S6KY	Acetamide (DrugBank:DB02736)|acetamide (IUPHAR:4661)|acetamide (TTD:D0S6KY)	Q15109	AGER	1.15252	14
D-00021	DrugBank:DB02736|IUPHAR:4661|TTD:D0S6KY	Acetamide (DrugBank:DB02736)|acetamide (IUPHAR:4661)|acetamide (TTD:D0S6KY)	Q99720	SIGMAR1	1.1491	15
D-00021	DrugBank:DB02736|IUPHAR:4661|TTD:D0S6KY	Acetamide (DrugBank:DB02736)|acetamide (IUPHAR:4661)|acetamide (TTD:D0S6KY)	P49286	MTNR1B	1.11275	16
D-00021	DrugBank:DB02736|IUPHAR:4661|TTD:D0S6KY	Acetamide (DrugBank:DB02736)|acetamide (IUPHAR:4661)|acetamide (TTD:D0S6KY)	P00915	CA1	1.09192	17
D-00021	DrugBank:DB02736|IUPHAR:4661|TTD:D0S6KY	Acetamide (DrugBank:DB02736)|acetamide (IUPHAR:4661)|acetamide (TTD:D0S6KY)	P32929	CTH	1.07349	18
D-00021	DrugBank:DB02736|IUPHAR:4661|TTD:D0S6KY	Acetamide (DrugBank:DB02736)|acetamide (IUPHAR:4661)|acetamide (TTD:D0S6KY)	P55789	GFER	1.06505	19
D-00021	DrugBank:DB02736|IUPHAR:4661|TTD:D0S6KY	Acetamide (DrugBank:DB02736)|acetamide (IUPHAR:4661)|acetamide (TTD:D0S6KY)	P22748	CA4	1.06162	20
D-00021	DrugBank:DB02736|IUPHAR:4661|TTD:D0S6KY	Acetamide (DrugBank:DB02736)|acetamide (IUPHAR:4661)|acetamide (TTD:D0S6KY)	Q96KQ7	EHMT2	0.871727	Known
D-00026	DrugBank:DB03166|IUPHAR:1058|KEGG:D00010|TTD:D04CRL|TTD:D0F1LZ	Acetic acid (DrugBank:DB03166)|acetic acid (IUPHAR:1058)|Acetic acid, glacial (USP) (KEGG:D00010)|Glatiramer Acetate (TTD:D04CRL)|Acetic Acid, Glacial (TTD:D0F1LZ)	Q96GD4	AURKB	2.64639	1
D-00026	DrugBank:DB03166|IUPHAR:1058|KEGG:D00010|TTD:D04CRL|TTD:D0F1LZ	Acetic acid (DrugBank:DB03166)|acetic acid (IUPHAR:1058)|Acetic acid, glacial (USP) (KEGG:D00010)|Glatiramer Acetate (TTD:D04CRL)|Acetic Acid, Glacial (TTD:D0F1LZ)	O14965	AURKA	2.57829	2
D-00026	DrugBank:DB03166|IUPHAR:1058|KEGG:D00010|TTD:D04CRL|TTD:D0F1LZ	Acetic acid (DrugBank:DB03166)|acetic acid (IUPHAR:1058)|Acetic acid, glacial (USP) (KEGG:D00010)|Glatiramer Acetate (TTD:D04CRL)|Acetic Acid, Glacial (TTD:D0F1LZ)	Q07912	TNK2	2.25651	3
D-00026	DrugBank:DB03166|IUPHAR:1058|KEGG:D00010|TTD:D04CRL|TTD:D0F1LZ	Acetic acid (DrugBank:DB03166)|acetic acid (IUPHAR:1058)|Acetic acid, glacial (USP) (KEGG:D00010)|Glatiramer Acetate (TTD:D04CRL)|Acetic Acid, Glacial (TTD:D0F1LZ)	Q16539	MAPK14	2.1756	4
D-00026	DrugBank:DB03166|IUPHAR:1058|KEGG:D00010|TTD:D04CRL|TTD:D0F1LZ	Acetic acid (DrugBank:DB03166)|acetic acid (IUPHAR:1058)|Acetic acid, glacial (USP) (KEGG:D00010)|Glatiramer Acetate (TTD:D04CRL)|Acetic Acid, Glacial (TTD:D0F1LZ)	Q99720	SIGMAR1	2.03866	5
D-00026	DrugBank:DB03166|IUPHAR:1058|KEGG:D00010|TTD:D04CRL|TTD:D0F1LZ	Acetic acid (DrugBank:DB03166)|acetic acid (IUPHAR:1058)|Acetic acid, glacial (USP) (KEGG:D00010)|Glatiramer Acetate (TTD:D04CRL)|Acetic Acid, Glacial (TTD:D0F1LZ)	P07948	LYN	2.02413	6
D-00026	DrugBank:DB03166|IUPHAR:1058|KEGG:D00010|TTD:D04CRL|TTD:D0F1LZ	Acetic acid (DrugBank:DB03166)|acetic acid (IUPHAR:1058)|Acetic acid, glacial (USP) (KEGG:D00010)|Glatiramer Acetate (TTD:D04CRL)|Acetic Acid, Glacial (TTD:D0F1LZ)	P10721	KIT	2.01382	7
D-00026	DrugBank:DB03166|IUPHAR:1058|KEGG:D00010|TTD:D04CRL|TTD:D0F1LZ	Acetic acid (DrugBank:DB03166)|acetic acid (IUPHAR:1058)|Acetic acid, glacial (USP) (KEGG:D00010)|Glatiramer Acetate (TTD:D04CRL)|Acetic Acid, Glacial (TTD:D0F1LZ)	P80192	MAP3K9	1.83208	8
D-00026	DrugBank:DB03166|IUPHAR:1058|KEGG:D00010|TTD:D04CRL|TTD:D0F1LZ	Acetic acid (DrugBank:DB03166)|acetic acid (IUPHAR:1058)|Acetic acid, glacial (USP) (KEGG:D00010)|Glatiramer Acetate (TTD:D04CRL)|Acetic Acid, Glacial (TTD:D0F1LZ)	P53779	MAPK10	1.80119	9
D-00026	DrugBank:DB03166|IUPHAR:1058|KEGG:D00010|TTD:D04CRL|TTD:D0F1LZ	Acetic acid (DrugBank:DB03166)|acetic acid (IUPHAR:1058)|Acetic acid, glacial (USP) (KEGG:D00010)|Glatiramer Acetate (TTD:D04CRL)|Acetic Acid, Glacial (TTD:D0F1LZ)	Q02779	MAP3K10	1.77151	10
D-00026	DrugBank:DB03166|IUPHAR:1058|KEGG:D00010|TTD:D04CRL|TTD:D0F1LZ	Acetic acid (DrugBank:DB03166)|acetic acid (IUPHAR:1058)|Acetic acid, glacial (USP) (KEGG:D00010)|Glatiramer Acetate (TTD:D04CRL)|Acetic Acid, Glacial (TTD:D0F1LZ)	P09769	FGR	1.76225	11
D-00026	DrugBank:DB03166|IUPHAR:1058|KEGG:D00010|TTD:D04CRL|TTD:D0F1LZ	Acetic acid (DrugBank:DB03166)|acetic acid (IUPHAR:1058)|Acetic acid, glacial (USP) (KEGG:D00010)|Glatiramer Acetate (TTD:D04CRL)|Acetic Acid, Glacial (TTD:D0F1LZ)	P00519	ABL1	1.71816	12
D-00026	DrugBank:DB03166|IUPHAR:1058|KEGG:D00010|TTD:D04CRL|TTD:D0F1LZ	Acetic acid (DrugBank:DB03166)|acetic acid (IUPHAR:1058)|Acetic acid, glacial (USP) (KEGG:D00010)|Glatiramer Acetate (TTD:D04CRL)|Acetic Acid, Glacial (TTD:D0F1LZ)	P51451	BLK	1.70913	13
D-00026	DrugBank:DB03166|IUPHAR:1058|KEGG:D00010|TTD:D04CRL|TTD:D0F1LZ	Acetic acid (DrugBank:DB03166)|acetic acid (IUPHAR:1058)|Acetic acid, glacial (USP) (KEGG:D00010)|Glatiramer Acetate (TTD:D04CRL)|Acetic Acid, Glacial (TTD:D0F1LZ)	Q16584	MAP3K11	1.67791	14
D-00026	DrugBank:DB03166|IUPHAR:1058|KEGG:D00010|TTD:D04CRL|TTD:D0F1LZ	Acetic acid (DrugBank:DB03166)|acetic acid (IUPHAR:1058)|Acetic acid, glacial (USP) (KEGG:D00010)|Glatiramer Acetate (TTD:D04CRL)|Acetic Acid, Glacial (TTD:D0F1LZ)	P04629	NTRK1	1.65291	15
D-00026	DrugBank:DB03166|IUPHAR:1058|KEGG:D00010|TTD:D04CRL|TTD:D0F1LZ	Acetic acid (DrugBank:DB03166)|acetic acid (IUPHAR:1058)|Acetic acid, glacial (USP) (KEGG:D00010)|Glatiramer Acetate (TTD:D04CRL)|Acetic Acid, Glacial (TTD:D0F1LZ)	Q15303	ERBB4	1.64936	16
D-00026	DrugBank:DB03166|IUPHAR:1058|KEGG:D00010|TTD:D04CRL|TTD:D0F1LZ	Acetic acid (DrugBank:DB03166)|acetic acid (IUPHAR:1058)|Acetic acid, glacial (USP) (KEGG:D00010)|Glatiramer Acetate (TTD:D04CRL)|Acetic Acid, Glacial (TTD:D0F1LZ)	P35968	KDR	1.64153	17
D-00026	DrugBank:DB03166|IUPHAR:1058|KEGG:D00010|TTD:D04CRL|TTD:D0F1LZ	Acetic acid (DrugBank:DB03166)|acetic acid (IUPHAR:1058)|Acetic acid, glacial (USP) (KEGG:D00010)|Glatiramer Acetate (TTD:D04CRL)|Acetic Acid, Glacial (TTD:D0F1LZ)	P07949	RET	1.63535	18
D-00026	DrugBank:DB03166|IUPHAR:1058|KEGG:D00010|TTD:D04CRL|TTD:D0F1LZ	Acetic acid (DrugBank:DB03166)|acetic acid (IUPHAR:1058)|Acetic acid, glacial (USP) (KEGG:D00010)|Glatiramer Acetate (TTD:D04CRL)|Acetic Acid, Glacial (TTD:D0F1LZ)	P24557	TBXAS1	1.53548	19
D-00026	DrugBank:DB03166|IUPHAR:1058|KEGG:D00010|TTD:D04CRL|TTD:D0F1LZ	Acetic acid (DrugBank:DB03166)|acetic acid (IUPHAR:1058)|Acetic acid, glacial (USP) (KEGG:D00010)|Glatiramer Acetate (TTD:D04CRL)|Acetic Acid, Glacial (TTD:D0F1LZ)	Q13163	MAP2K5	1.51229	20
D-00026	DrugBank:DB03166|IUPHAR:1058|KEGG:D00010|TTD:D04CRL|TTD:D0F1LZ	Acetic acid (DrugBank:DB03166)|acetic acid (IUPHAR:1058)|Acetic acid, glacial (USP) (KEGG:D00010)|Glatiramer Acetate (TTD:D04CRL)|Acetic Acid, Glacial (TTD:D0F1LZ)	P06239	LCK	1.2343	Known
D-00026	DrugBank:DB03166|IUPHAR:1058|KEGG:D00010|TTD:D04CRL|TTD:D0F1LZ	Acetic acid (DrugBank:DB03166)|acetic acid (IUPHAR:1058)|Acetic acid, glacial (USP) (KEGG:D00010)|Glatiramer Acetate (TTD:D04CRL)|Acetic Acid, Glacial (TTD:D0F1LZ)	P06241	FYN	0.607078	Known
D-00029	DrugBank:DB14189|KEGG:D01114|TTD:D0WT6A	Ethylenediamine (DrugBank:DB14189)|Ethylenediamine (USP/JP17) (KEGG:D01114)	P04278	SHBG	3.23257	1
D-00029	DrugBank:DB14189|KEGG:D01114|TTD:D0WT6A	Ethylenediamine (DrugBank:DB14189)|Ethylenediamine (USP/JP17) (KEGG:D01114)	Q99527	GPER1	2.72241	2
D-00029	DrugBank:DB14189|KEGG:D01114|TTD:D0WT6A	Ethylenediamine (DrugBank:DB14189)|Ethylenediamine (USP/JP17) (KEGG:D01114)	Q9Y2T6	GPR55	2.62937	3
D-00029	DrugBank:DB14189|KEGG:D01114|TTD:D0WT6A	Ethylenediamine (DrugBank:DB14189)|Ethylenediamine (USP/JP17) (KEGG:D01114)	Q9Y2T5	GPR52	2.61433	4
D-00029	DrugBank:DB14189|KEGG:D01114|TTD:D0WT6A	Ethylenediamine (DrugBank:DB14189)|Ethylenediamine (USP/JP17) (KEGG:D01114)	P08235	NR3C2	2.3901	5
D-00029	DrugBank:DB14189|KEGG:D01114|TTD:D0WT6A	Ethylenediamine (DrugBank:DB14189)|Ethylenediamine (USP/JP17) (KEGG:D01114)	P02753	RBP4	2.14235	6
D-00029	DrugBank:DB14189|KEGG:D01114|TTD:D0WT6A	Ethylenediamine (DrugBank:DB14189)|Ethylenediamine (USP/JP17) (KEGG:D01114)	P22748	CA4	2.11623	7
D-00029	DrugBank:DB14189|KEGG:D01114|TTD:D0WT6A	Ethylenediamine (DrugBank:DB14189)|Ethylenediamine (USP/JP17) (KEGG:D01114)	P10275	AR	1.98895	8
D-00029	DrugBank:DB14189|KEGG:D01114|TTD:D0WT6A	Ethylenediamine (DrugBank:DB14189)|Ethylenediamine (USP/JP17) (KEGG:D01114)	P11474	ESRRA	1.82075	9
D-00029	DrugBank:DB14189|KEGG:D01114|TTD:D0WT6A	Ethylenediamine (DrugBank:DB14189)|Ethylenediamine (USP/JP17) (KEGG:D01114)	P23975	SLC6A2	1.71609	10
D-00029	DrugBank:DB14189|KEGG:D01114|TTD:D0WT6A	Ethylenediamine (DrugBank:DB14189)|Ethylenediamine (USP/JP17) (KEGG:D01114)	P62508	ESRRG	1.67132	11
D-00029	DrugBank:DB14189|KEGG:D01114|TTD:D0WT6A	Ethylenediamine (DrugBank:DB14189)|Ethylenediamine (USP/JP17) (KEGG:D01114)	Q92731	ESR2	1.65673	12
D-00029	DrugBank:DB14189|KEGG:D01114|TTD:D0WT6A	Ethylenediamine (DrugBank:DB14189)|Ethylenediamine (USP/JP17) (KEGG:D01114)	P51449	RORC	1.6131	13
D-00029	DrugBank:DB14189|KEGG:D01114|TTD:D0WT6A	Ethylenediamine (DrugBank:DB14189)|Ethylenediamine (USP/JP17) (KEGG:D01114)	O95718	ESRRB	1.58102	14
D-00029	DrugBank:DB14189|KEGG:D01114|TTD:D0WT6A	Ethylenediamine (DrugBank:DB14189)|Ethylenediamine (USP/JP17) (KEGG:D01114)	P34913	EPHX2	1.51626	15
D-00029	DrugBank:DB14189|KEGG:D01114|TTD:D0WT6A	Ethylenediamine (DrugBank:DB14189)|Ethylenediamine (USP/JP17) (KEGG:D01114)	P06401	PGR	1.51315	16
D-00029	DrugBank:DB14189|KEGG:D01114|TTD:D0WT6A	Ethylenediamine (DrugBank:DB14189)|Ethylenediamine (USP/JP17) (KEGG:D01114)	Q8NER1	TRPV1	1.46887	17
D-00029	DrugBank:DB14189|KEGG:D01114|TTD:D0WT6A	Ethylenediamine (DrugBank:DB14189)|Ethylenediamine (USP/JP17) (KEGG:D01114)	O43570	CA12	1.46629	18
D-00029	DrugBank:DB14189|KEGG:D01114|TTD:D0WT6A	Ethylenediamine (DrugBank:DB14189)|Ethylenediamine (USP/JP17) (KEGG:D01114)	P50225	SULT1A1	1.46476	19
D-00029	DrugBank:DB14189|KEGG:D01114|TTD:D0WT6A	Ethylenediamine (DrugBank:DB14189)|Ethylenediamine (USP/JP17) (KEGG:D01114)	P31639	SLC5A2	1.4282	20
D-00029	DrugBank:DB14189|KEGG:D01114|TTD:D0WT6A	Ethylenediamine (DrugBank:DB14189)|Ethylenediamine (USP/JP17) (KEGG:D01114)	P03372	ESR1	1.30343	Known
D-00040	IUPHAR:4553|TTD:D0L0SP	acrylamide (IUPHAR:4553)	Q9NZJ5	EIF2AK3	2.95719	1
D-00040	IUPHAR:4553|TTD:D0L0SP	acrylamide (IUPHAR:4553)	P22607	FGFR3	2.37943	2
D-00040	IUPHAR:4553|TTD:D0L0SP	acrylamide (IUPHAR:4553)	P51813	BMX	2.30394	3
D-00040	IUPHAR:4553|TTD:D0L0SP	acrylamide (IUPHAR:4553)	Q9Y572	RIPK3	2.24481	4
D-00040	IUPHAR:4553|TTD:D0L0SP	acrylamide (IUPHAR:4553)	P35916	FLT4	2.07773	5
D-00040	IUPHAR:4553|TTD:D0L0SP	acrylamide (IUPHAR:4553)	P22455	FGFR4	2.06481	Known
D-00040	IUPHAR:4553|TTD:D0L0SP	acrylamide (IUPHAR:4553)	P17948	FLT1	2.0236	6
D-00040	IUPHAR:4553|TTD:D0L0SP	acrylamide (IUPHAR:4553)	P51451	BLK	2.02216	7
D-00040	IUPHAR:4553|TTD:D0L0SP	acrylamide (IUPHAR:4553)	P21802	FGFR2	1.87692	8
D-00040	IUPHAR:4553|TTD:D0L0SP	acrylamide (IUPHAR:4553)	P35968	KDR	1.75611	9
D-00040	IUPHAR:4553|TTD:D0L0SP	acrylamide (IUPHAR:4553)	Q9BWU1	CDK19	1.75444	10
D-00040	IUPHAR:4553|TTD:D0L0SP	acrylamide (IUPHAR:4553)	P08069	IGF1R	1.69435	11
D-00040	IUPHAR:4553|TTD:D0L0SP	acrylamide (IUPHAR:4553)	P15692	VEGFA	1.61273	12
D-00040	IUPHAR:4553|TTD:D0L0SP	acrylamide (IUPHAR:4553)	P10721	KIT	1.58087	13
D-00040	IUPHAR:4553|TTD:D0L0SP	acrylamide (IUPHAR:4553)	P00519	ABL1	1.57402	14
D-00040	IUPHAR:4553|TTD:D0L0SP	acrylamide (IUPHAR:4553)	Q15375	EPHA7	1.52017	15
D-00040	IUPHAR:4553|TTD:D0L0SP	acrylamide (IUPHAR:4553)	P06239	LCK	1.47297	16
D-00040	IUPHAR:4553|TTD:D0L0SP	acrylamide (IUPHAR:4553)	Q02763	TEK	1.46603	17
D-00040	IUPHAR:4553|TTD:D0L0SP	acrylamide (IUPHAR:4553)	Q13546	RIPK1	1.4501	18
D-00040	IUPHAR:4553|TTD:D0L0SP	acrylamide (IUPHAR:4553)	P07333	CSF1R	1.43664	19
D-00040	IUPHAR:4553|TTD:D0L0SP	acrylamide (IUPHAR:4553)	P09769	FGR	1.41672	20
D-00060	DrugBank:DB03095|TTD:D0T9SK	Tetramethylammonium Ion (DrugBank:DB03095)	P83916	CBX1	2.60483	1
D-00060	DrugBank:DB03095|TTD:D0T9SK	Tetramethylammonium Ion (DrugBank:DB03095)	Q9GZV3	SLC5A7	2.24504	2
D-00060	DrugBank:DB03095|TTD:D0T9SK	Tetramethylammonium Ion (DrugBank:DB03095)	P36544	CHRNA7	2.11295	Known
D-00060	DrugBank:DB03095|TTD:D0T9SK	Tetramethylammonium Ion (DrugBank:DB03095)	P08172	CHRM2	1.98363	3
D-00060	DrugBank:DB03095|TTD:D0T9SK	Tetramethylammonium Ion (DrugBank:DB03095)	Q15822	CHRNA2	1.85772	4
D-00060	DrugBank:DB03095|TTD:D0T9SK	Tetramethylammonium Ion (DrugBank:DB03095)	P43681	CHRNA4	1.65029	5
D-00060	DrugBank:DB03095|TTD:D0T9SK	Tetramethylammonium Ion (DrugBank:DB03095)	P46098	HTR3A	1.52338	6
D-00060	DrugBank:DB03095|TTD:D0T9SK	Tetramethylammonium Ion (DrugBank:DB03095)	P32297	CHRNA3	1.48934	7
D-00060	DrugBank:DB03095|TTD:D0T9SK	Tetramethylammonium Ion (DrugBank:DB03095)	P03372	ESR1	1.3408	8
D-00060	DrugBank:DB03095|TTD:D0T9SK	Tetramethylammonium Ion (DrugBank:DB03095)	P35869	AHR	1.20656	9
D-00060	DrugBank:DB03095|TTD:D0T9SK	Tetramethylammonium Ion (DrugBank:DB03095)	P23786	CPT2	1.10241	10
D-00060	DrugBank:DB03095|TTD:D0T9SK	Tetramethylammonium Ion (DrugBank:DB03095)	Q12809	KCNH2	1.07297	11
D-00060	DrugBank:DB03095|TTD:D0T9SK	Tetramethylammonium Ion (DrugBank:DB03095)	P47775	GPR12	1.05343	12
D-00060	DrugBank:DB03095|TTD:D0T9SK	Tetramethylammonium Ion (DrugBank:DB03095)	Q13639	HTR4	1.0201	13
D-00060	DrugBank:DB03095|TTD:D0T9SK	Tetramethylammonium Ion (DrugBank:DB03095)	Q9NUW8	TDP1	0.99873	14
D-00060	DrugBank:DB03095|TTD:D0T9SK	Tetramethylammonium Ion (DrugBank:DB03095)	P02708	CHRNA1	0.96041	15
D-00060	DrugBank:DB03095|TTD:D0T9SK	Tetramethylammonium Ion (DrugBank:DB03095)	Q99788	CMKLR1	0.957956	16
D-00060	DrugBank:DB03095|TTD:D0T9SK	Tetramethylammonium Ion (DrugBank:DB03095)	P11229	CHRM1	0.845369	17
D-00060	DrugBank:DB03095|TTD:D0T9SK	Tetramethylammonium Ion (DrugBank:DB03095)	P16473	TSHR	0.833437	18
D-00060	DrugBank:DB03095|TTD:D0T9SK	Tetramethylammonium Ion (DrugBank:DB03095)	P14618	PKM	0.761418	19
D-00060	DrugBank:DB03095|TTD:D0T9SK	Tetramethylammonium Ion (DrugBank:DB03095)	O60755	GALR3	0.758502	20
D-00061	DrugBank:DB00551|KEGG:D00220|TTD:D0R9BG	Acetohydroxamic acid (DrugBank:DB00551)|Acetohydroxamic acid (USP/INN) (KEGG:D00220)|Acetohydroxamic Acid (TTD:D0R9BG)	P03956	MMP1	2.48918	1
D-00061	DrugBank:DB00551|KEGG:D00220|TTD:D0R9BG	Acetohydroxamic acid (DrugBank:DB00551)|Acetohydroxamic acid (USP/INN) (KEGG:D00220)|Acetohydroxamic Acid (TTD:D0R9BG)	P08253	MMP2	2.07177	2
D-00061	DrugBank:DB00551|KEGG:D00220|TTD:D0R9BG	Acetohydroxamic acid (DrugBank:DB00551)|Acetohydroxamic acid (USP/INN) (KEGG:D00220)|Acetohydroxamic Acid (TTD:D0R9BG)	P14780	MMP9	1.95285	3
D-00061	DrugBank:DB00551|KEGG:D00220|TTD:D0R9BG	Acetohydroxamic acid (DrugBank:DB00551)|Acetohydroxamic acid (USP/INN) (KEGG:D00220)|Acetohydroxamic Acid (TTD:D0R9BG)	Q9UBN7	HDAC6	1.89133	4
D-00061	DrugBank:DB00551|KEGG:D00220|TTD:D0R9BG	Acetohydroxamic acid (DrugBank:DB00551)|Acetohydroxamic acid (USP/INN) (KEGG:D00220)|Acetohydroxamic Acid (TTD:D0R9BG)	P45452	MMP13	1.54555	5
D-00061	DrugBank:DB00551|KEGG:D00220|TTD:D0R9BG	Acetohydroxamic acid (DrugBank:DB00551)|Acetohydroxamic acid (USP/INN) (KEGG:D00220)|Acetohydroxamic Acid (TTD:D0R9BG)	O15379	HDAC3	1.39816	6
D-00061	DrugBank:DB00551|KEGG:D00220|TTD:D0R9BG	Acetohydroxamic acid (DrugBank:DB00551)|Acetohydroxamic acid (USP/INN) (KEGG:D00220)|Acetohydroxamic Acid (TTD:D0R9BG)	P21728	DRD1	1.37903	7
D-00061	DrugBank:DB00551|KEGG:D00220|TTD:D0R9BG	Acetohydroxamic acid (DrugBank:DB00551)|Acetohydroxamic acid (USP/INN) (KEGG:D00220)|Acetohydroxamic Acid (TTD:D0R9BG)	Q13547	HDAC1	1.35229	8
D-00061	DrugBank:DB00551|KEGG:D00220|TTD:D0R9BG	Acetohydroxamic acid (DrugBank:DB00551)|Acetohydroxamic acid (USP/INN) (KEGG:D00220)|Acetohydroxamic Acid (TTD:D0R9BG)	P41252	IARS	1.2083	9
D-00061	DrugBank:DB00551|KEGG:D00220|TTD:D0R9BG	Acetohydroxamic acid (DrugBank:DB00551)|Acetohydroxamic acid (USP/INN) (KEGG:D00220)|Acetohydroxamic Acid (TTD:D0R9BG)	P23141	CES1	1.17045	10
D-00061	DrugBank:DB00551|KEGG:D00220|TTD:D0R9BG	Acetohydroxamic acid (DrugBank:DB00551)|Acetohydroxamic acid (USP/INN) (KEGG:D00220)|Acetohydroxamic Acid (TTD:D0R9BG)	P83916	CBX1	1.14908	11
D-00061	DrugBank:DB00551|KEGG:D00220|TTD:D0R9BG	Acetohydroxamic acid (DrugBank:DB00551)|Acetohydroxamic acid (USP/INN) (KEGG:D00220)|Acetohydroxamic Acid (TTD:D0R9BG)	P07477	PRSS1	1.12265	12
D-00061	DrugBank:DB00551|KEGG:D00220|TTD:D0R9BG	Acetohydroxamic acid (DrugBank:DB00551)|Acetohydroxamic acid (USP/INN) (KEGG:D00220)|Acetohydroxamic Acid (TTD:D0R9BG)	P00156	MT-CYB	1.1102	13
D-00061	DrugBank:DB00551|KEGG:D00220|TTD:D0R9BG	Acetohydroxamic acid (DrugBank:DB00551)|Acetohydroxamic acid (USP/INN) (KEGG:D00220)|Acetohydroxamic Acid (TTD:D0R9BG)	P28221	HTR1D	1.10735	14
D-00061	DrugBank:DB00551|KEGG:D00220|TTD:D0R9BG	Acetohydroxamic acid (DrugBank:DB00551)|Acetohydroxamic acid (USP/INN) (KEGG:D00220)|Acetohydroxamic Acid (TTD:D0R9BG)	Q9Y5Y6	ST14	1.10659	15
D-00061	DrugBank:DB00551|KEGG:D00220|TTD:D0R9BG	Acetohydroxamic acid (DrugBank:DB00551)|Acetohydroxamic acid (USP/INN) (KEGG:D00220)|Acetohydroxamic Acid (TTD:D0R9BG)	P08254	MMP3	1.08961	16
D-00061	DrugBank:DB00551|KEGG:D00220|TTD:D0R9BG	Acetohydroxamic acid (DrugBank:DB00551)|Acetohydroxamic acid (USP/INN) (KEGG:D00220)|Acetohydroxamic Acid (TTD:D0R9BG)	P22894	MMP8	1.08483	17
D-00061	DrugBank:DB00551|KEGG:D00220|TTD:D0R9BG	Acetohydroxamic acid (DrugBank:DB00551)|Acetohydroxamic acid (USP/INN) (KEGG:D00220)|Acetohydroxamic Acid (TTD:D0R9BG)	Q969S8	HDAC10	1.08106	18
D-00061	DrugBank:DB00551|KEGG:D00220|TTD:D0R9BG	Acetohydroxamic acid (DrugBank:DB00551)|Acetohydroxamic acid (USP/INN) (KEGG:D00220)|Acetohydroxamic Acid (TTD:D0R9BG)	Q99714	HSD17B10	1.04985	19
D-00061	DrugBank:DB00551|KEGG:D00220|TTD:D0R9BG	Acetohydroxamic acid (DrugBank:DB00551)|Acetohydroxamic acid (USP/INN) (KEGG:D00220)|Acetohydroxamic Acid (TTD:D0R9BG)	P22303	ACHE	1.04494	20
D-00061	DrugBank:DB00551|KEGG:D00220|TTD:D0R9BG	Acetohydroxamic acid (DrugBank:DB00551)|Acetohydroxamic acid (USP/INN) (KEGG:D00220)|Acetohydroxamic Acid (TTD:D0R9BG)	Q9NUW8	TDP1	0.624988	Known
D-00083	TTD:D08ZFJ	Colestilan (TTD:D08ZFJ)	P43490	NAMPT	3.63903	1
D-00083	TTD:D08ZFJ	Colestilan (TTD:D08ZFJ)	P32247	BRS3	2.62445	2
D-00083	TTD:D08ZFJ	Colestilan (TTD:D08ZFJ)	O43614	HCRTR2	2.11238	3
D-00083	TTD:D08ZFJ	Colestilan (TTD:D08ZFJ)	P48039	MTNR1A	2.09531	4
D-00083	TTD:D08ZFJ	Colestilan (TTD:D08ZFJ)	P08913	ADRA2A	1.95269	5
D-00083	TTD:D08ZFJ	Colestilan (TTD:D08ZFJ)	P41595	HTR2B	1.90381	6
D-00083	TTD:D08ZFJ	Colestilan (TTD:D08ZFJ)	P49286	MTNR1B	1.89107	7
D-00083	TTD:D08ZFJ	Colestilan (TTD:D08ZFJ)	P11511	CYP19A1	1.79969	8
D-00083	TTD:D08ZFJ	Colestilan (TTD:D08ZFJ)	P05177	CYP1A2	1.77501	9
D-00083	TTD:D08ZFJ	Colestilan (TTD:D08ZFJ)	P14061	HSD17B1	1.74471	10
D-00083	TTD:D08ZFJ	Colestilan (TTD:D08ZFJ)	P18089	ADRA2B	1.71449	11
D-00083	TTD:D08ZFJ	Colestilan (TTD:D08ZFJ)	P11509	CYP2A6	1.69786	12
D-00083	TTD:D08ZFJ	Colestilan (TTD:D08ZFJ)	Q9Y5N1	HRH3	1.68587	13
D-00083	TTD:D08ZFJ	Colestilan (TTD:D08ZFJ)	P15538	CYP11B1	1.53572	14
D-00083	TTD:D08ZFJ	Colestilan (TTD:D08ZFJ)	P19224	UGT1A6	1.5174	15
D-00083	TTD:D08ZFJ	Colestilan (TTD:D08ZFJ)	P37231	PPARG	1.48908	16
D-00083	TTD:D08ZFJ	Colestilan (TTD:D08ZFJ)	Q13698	CACNA1S	1.45405	17
D-00083	TTD:D08ZFJ	Colestilan (TTD:D08ZFJ)	P19099	CYP11B2	1.44842	18
D-00083	TTD:D08ZFJ	Colestilan (TTD:D08ZFJ)	O43613	HCRTR1	1.43643	19
D-00083	TTD:D08ZFJ	Colestilan (TTD:D08ZFJ)	P25100	ADRA1D	1.4216	20
D-00083	TTD:D08ZFJ	Colestilan (TTD:D08ZFJ)	P08684	CYP3A4	1.22551	Known
D-00085	IUPHAR:2417|TTD:D08MUZ	2-pentenal (IUPHAR:2417)	P25090	FPR2	6.1348	1
D-00085	IUPHAR:2417|TTD:D08MUZ	2-pentenal (IUPHAR:2417)	O75388	GPR32	5.24506	2
D-00085	IUPHAR:2417|TTD:D08MUZ	2-pentenal (IUPHAR:2417)	P29466	CASP1	2.5456	3
D-00085	IUPHAR:2417|TTD:D08MUZ	2-pentenal (IUPHAR:2417)	P10145	CXCL8	2.31504	4
D-00085	IUPHAR:2417|TTD:D08MUZ	2-pentenal (IUPHAR:2417)	Q9UBY5	LPAR3	2.31306	5
D-00085	IUPHAR:2417|TTD:D08MUZ	2-pentenal (IUPHAR:2417)	Q8NER1	TRPV1	1.79291	6
D-00085	IUPHAR:2417|TTD:D08MUZ	2-pentenal (IUPHAR:2417)	Q7Z2W7	TRPM8	1.34936	7
D-00085	IUPHAR:2417|TTD:D08MUZ	2-pentenal (IUPHAR:2417)	P34913	EPHX2	1.28059	8
D-00085	IUPHAR:2417|TTD:D08MUZ	2-pentenal (IUPHAR:2417)	Q8NET8	TRPV3	1.15397	9
D-00085	IUPHAR:2417|TTD:D08MUZ	2-pentenal (IUPHAR:2417)	Q8TDS5	OXER1	1.11238	10
D-00085	IUPHAR:2417|TTD:D08MUZ	2-pentenal (IUPHAR:2417)	Q9HBW0	LPAR2	1.02558	11
D-00085	IUPHAR:2417|TTD:D08MUZ	2-pentenal (IUPHAR:2417)	P21554	CNR1	1.00528	12
D-00085	IUPHAR:2417|TTD:D08MUZ	2-pentenal (IUPHAR:2417)	Q9Y2T6	GPR55	1.00425	13
D-00085	IUPHAR:2417|TTD:D08MUZ	2-pentenal (IUPHAR:2417)	Q16696	CYP2A13	0.989006	14
D-00085	IUPHAR:2417|TTD:D08MUZ	2-pentenal (IUPHAR:2417)	Q92633	LPAR1	0.968919	15
D-00085	IUPHAR:2417|TTD:D08MUZ	2-pentenal (IUPHAR:2417)	P42330	AKR1C3	0.953314	16
D-00085	IUPHAR:2417|TTD:D08MUZ	2-pentenal (IUPHAR:2417)	Q07869	PPARA	0.943765	17
D-00085	IUPHAR:2417|TTD:D08MUZ	2-pentenal (IUPHAR:2417)	Q14790	CASP8	0.931801	18
D-00085	IUPHAR:2417|TTD:D08MUZ	2-pentenal (IUPHAR:2417)	P14174	MIF	0.925933	19
D-00085	IUPHAR:2417|TTD:D08MUZ	2-pentenal (IUPHAR:2417)	P07858	CTSB	0.863216	20
D-00085	IUPHAR:2417|TTD:D08MUZ	2-pentenal (IUPHAR:2417)	O75762	TRPA1	0.704358	Known
D-00108	IUPHAR:4538|KEGG:D07103|TTD:D01FAR	oxalate (IUPHAR:4538)|Cerium oxalate (KEGG:D07103)|oxalate (TTD:D01FAR)	O75493	CA11	3.24413	1
D-00108	IUPHAR:4538|KEGG:D07103|TTD:D01FAR	oxalate (IUPHAR:4538)|Cerium oxalate (KEGG:D07103)|oxalate (TTD:D01FAR)	Q8N1Q1	CA13	2.35078	2
D-00108	IUPHAR:4538|KEGG:D07103|TTD:D01FAR	oxalate (IUPHAR:4538)|Cerium oxalate (KEGG:D07103)|oxalate (TTD:D01FAR)	P43166	CA7	2.23757	3
D-00108	IUPHAR:4538|KEGG:D07103|TTD:D01FAR	oxalate (IUPHAR:4538)|Cerium oxalate (KEGG:D07103)|oxalate (TTD:D01FAR)	Q9NY33	DPP3	2.05735	4
D-00108	IUPHAR:4538|KEGG:D07103|TTD:D01FAR	oxalate (IUPHAR:4538)|Cerium oxalate (KEGG:D07103)|oxalate (TTD:D01FAR)	O43570	CA12	1.8991	5
D-00108	IUPHAR:4538|KEGG:D07103|TTD:D01FAR	oxalate (IUPHAR:4538)|Cerium oxalate (KEGG:D07103)|oxalate (TTD:D01FAR)	P04035	HMGCR	1.88596	6
D-00108	IUPHAR:4538|KEGG:D07103|TTD:D01FAR	oxalate (IUPHAR:4538)|Cerium oxalate (KEGG:D07103)|oxalate (TTD:D01FAR)	P37268	FDFT1	1.76567	7
D-00108	IUPHAR:4538|KEGG:D07103|TTD:D01FAR	oxalate (IUPHAR:4538)|Cerium oxalate (KEGG:D07103)|oxalate (TTD:D01FAR)	P53779	MAPK10	1.74915	8
D-00108	IUPHAR:4538|KEGG:D07103|TTD:D01FAR	oxalate (IUPHAR:4538)|Cerium oxalate (KEGG:D07103)|oxalate (TTD:D01FAR)	Q16678	CYP1B1	1.58664	9
D-00108	IUPHAR:4538|KEGG:D07103|TTD:D01FAR	oxalate (IUPHAR:4538)|Cerium oxalate (KEGG:D07103)|oxalate (TTD:D01FAR)	Q9ULX7	CA14	1.49078	10
D-00108	IUPHAR:4538|KEGG:D07103|TTD:D01FAR	oxalate (IUPHAR:4538)|Cerium oxalate (KEGG:D07103)|oxalate (TTD:D01FAR)	P04798	CYP1A1	1.42449	11
D-00108	IUPHAR:4538|KEGG:D07103|TTD:D01FAR	oxalate (IUPHAR:4538)|Cerium oxalate (KEGG:D07103)|oxalate (TTD:D01FAR)	P22748	CA4	1.40551	Known
D-00108	IUPHAR:4538|KEGG:D07103|TTD:D01FAR	oxalate (IUPHAR:4538)|Cerium oxalate (KEGG:D07103)|oxalate (TTD:D01FAR)	Q99714	HSD17B10	1.25001	12
D-00108	IUPHAR:4538|KEGG:D07103|TTD:D01FAR	oxalate (IUPHAR:4538)|Cerium oxalate (KEGG:D07103)|oxalate (TTD:D01FAR)	P39748	FEN1	1.17096	13
D-00108	IUPHAR:4538|KEGG:D07103|TTD:D01FAR	oxalate (IUPHAR:4538)|Cerium oxalate (KEGG:D07103)|oxalate (TTD:D01FAR)	Q16665	HIF1A	1.15624	14
D-00108	IUPHAR:4538|KEGG:D07103|TTD:D01FAR	oxalate (IUPHAR:4538)|Cerium oxalate (KEGG:D07103)|oxalate (TTD:D01FAR)	P00915	CA1	1.15592	15
D-00108	IUPHAR:4538|KEGG:D07103|TTD:D01FAR	oxalate (IUPHAR:4538)|Cerium oxalate (KEGG:D07103)|oxalate (TTD:D01FAR)	P21397	MAOA	1.09469	16
D-00108	IUPHAR:4538|KEGG:D07103|TTD:D01FAR	oxalate (IUPHAR:4538)|Cerium oxalate (KEGG:D07103)|oxalate (TTD:D01FAR)	Q9HC97	GPR35	1.09309	17
D-00108	IUPHAR:4538|KEGG:D07103|TTD:D01FAR	oxalate (IUPHAR:4538)|Cerium oxalate (KEGG:D07103)|oxalate (TTD:D01FAR)	P16152	CBR1	1.08442	18
D-00108	IUPHAR:4538|KEGG:D07103|TTD:D01FAR	oxalate (IUPHAR:4538)|Cerium oxalate (KEGG:D07103)|oxalate (TTD:D01FAR)	Q16539	MAPK14	1.01668	19
D-00108	IUPHAR:4538|KEGG:D07103|TTD:D01FAR	oxalate (IUPHAR:4538)|Cerium oxalate (KEGG:D07103)|oxalate (TTD:D01FAR)	P11511	CYP19A1	1.00969	20
D-00115	DrugBank:DB03568|IUPHAR:1059|TTD:D0T4JQ	Butyric Acid (DrugBank:DB03568)|butyric acid (IUPHAR:1059)	P13726	F3	3.60699	1
D-00115	DrugBank:DB03568|IUPHAR:1059|TTD:D0T4JQ	Butyric Acid (DrugBank:DB03568)|butyric acid (IUPHAR:1059)	O75376	NCOR1	2.92082	2
D-00115	DrugBank:DB03568|IUPHAR:1059|TTD:D0T4JQ	Butyric Acid (DrugBank:DB03568)|butyric acid (IUPHAR:1059)	Q92769	HDAC2	2.58724	3
D-00115	DrugBank:DB03568|IUPHAR:1059|TTD:D0T4JQ	Butyric Acid (DrugBank:DB03568)|butyric acid (IUPHAR:1059)	Q13547	HDAC1	2.56541	4
D-00115	DrugBank:DB03568|IUPHAR:1059|TTD:D0T4JQ	Butyric Acid (DrugBank:DB03568)|butyric acid (IUPHAR:1059)	Q15393	SF3B3	2.34768	5
D-00115	DrugBank:DB03568|IUPHAR:1059|TTD:D0T4JQ	Butyric Acid (DrugBank:DB03568)|butyric acid (IUPHAR:1059)	Q9UBN7	HDAC6	2.14584	6
D-00115	DrugBank:DB03568|IUPHAR:1059|TTD:D0T4JQ	Butyric Acid (DrugBank:DB03568)|butyric acid (IUPHAR:1059)	Q15722	LTB4R	2.01858	7
D-00115	DrugBank:DB03568|IUPHAR:1059|TTD:D0T4JQ	Butyric Acid (DrugBank:DB03568)|butyric acid (IUPHAR:1059)	Q969S8	HDAC10	1.95301	8
D-00115	DrugBank:DB03568|IUPHAR:1059|TTD:D0T4JQ	Butyric Acid (DrugBank:DB03568)|butyric acid (IUPHAR:1059)	O60885	BRD4	1.94304	9
D-00115	DrugBank:DB03568|IUPHAR:1059|TTD:D0T4JQ	Butyric Acid (DrugBank:DB03568)|butyric acid (IUPHAR:1059)	Q96DB2	HDAC11	1.84121	10
D-00115	DrugBank:DB03568|IUPHAR:1059|TTD:D0T4JQ	Butyric Acid (DrugBank:DB03568)|butyric acid (IUPHAR:1059)	O43570	CA12	1.8316	11
D-00115	DrugBank:DB03568|IUPHAR:1059|TTD:D0T4JQ	Butyric Acid (DrugBank:DB03568)|butyric acid (IUPHAR:1059)	P35408	PTGER4	1.77006	12
D-00115	DrugBank:DB03568|IUPHAR:1059|TTD:D0T4JQ	Butyric Acid (DrugBank:DB03568)|butyric acid (IUPHAR:1059)	Q9NPC1	LTB4R2	1.76123	13
D-00115	DrugBank:DB03568|IUPHAR:1059|TTD:D0T4JQ	Butyric Acid (DrugBank:DB03568)|butyric acid (IUPHAR:1059)	P25090	FPR2	1.69635	14
D-00115	DrugBank:DB03568|IUPHAR:1059|TTD:D0T4JQ	Butyric Acid (DrugBank:DB03568)|butyric acid (IUPHAR:1059)	O15379	HDAC3	1.66195	Known
D-00115	DrugBank:DB03568|IUPHAR:1059|TTD:D0T4JQ	Butyric Acid (DrugBank:DB03568)|butyric acid (IUPHAR:1059)	P34913	EPHX2	1.53036	15
D-00115	DrugBank:DB03568|IUPHAR:1059|TTD:D0T4JQ	Butyric Acid (DrugBank:DB03568)|butyric acid (IUPHAR:1059)	P43115	PTGER3	1.51695	16
D-00115	DrugBank:DB03568|IUPHAR:1059|TTD:D0T4JQ	Butyric Acid (DrugBank:DB03568)|butyric acid (IUPHAR:1059)	Q01469	FABP5	1.44946	17
D-00115	DrugBank:DB03568|IUPHAR:1059|TTD:D0T4JQ	Butyric Acid (DrugBank:DB03568)|butyric acid (IUPHAR:1059)	O75388	GPR32	1.41615	18
D-00115	DrugBank:DB03568|IUPHAR:1059|TTD:D0T4JQ	Butyric Acid (DrugBank:DB03568)|butyric acid (IUPHAR:1059)	P21731	TBXA2R	1.40005	19
D-00115	DrugBank:DB03568|IUPHAR:1059|TTD:D0T4JQ	Butyric Acid (DrugBank:DB03568)|butyric acid (IUPHAR:1059)	Q9UKV0	HDAC9	1.36416	20
D-00136	TTD:D09PNQ		P43235	CTSK	2.78271	1
D-00136	TTD:D09PNQ		P11309	PIM1	2.63493	2
D-00136	TTD:D09PNQ		P29466	CASP1	2.58036	3
D-00136	TTD:D09PNQ		Q14790	CASP8	2.33353	4
D-00136	TTD:D09PNQ		O43570	CA12	2.32275	5
D-00136	TTD:D09PNQ		Q9NY33	DPP3	2.1175	6
D-00136	TTD:D09PNQ		P56817	BACE1	1.80599	7
D-00136	TTD:D09PNQ		P07858	CTSB	1.70532	8
D-00136	TTD:D09PNQ		P10145	CXCL8	1.63273	9
D-00136	TTD:D09PNQ		P09668	CTSH	1.5871	10
D-00136	TTD:D09PNQ		P03956	MMP1	1.53117	11
D-00136	TTD:D09PNQ		P14550	AKR1A1	1.46572	12
D-00136	TTD:D09PNQ		P15121	AKR1B1	1.42561	Known
D-00136	TTD:D09PNQ		Q9Y5Y4	PTGDR2	1.40339	13
D-00136	TTD:D09PNQ		P42574	CASP3	1.3917	14
D-00136	TTD:D09PNQ		Q9GZV3	SLC5A7	1.37816	15
D-00136	TTD:D09PNQ		P22748	CA4	1.35429	16
D-00136	TTD:D09PNQ		P35372	OPRM1	1.3128	17
D-00136	TTD:D09PNQ		P04062	GBA	1.2598	18
D-00136	TTD:D09PNQ		P37058	HSD17B3	1.23167	19
D-00136	TTD:D09PNQ		Q92731	ESR2	1.22267	20
D-00146	IUPHAR:5139|TTD:D01IGU|TTD:D0F1ZX|TTD:D0K6WI	APA (IUPHAR:5139)|APA (TTD:D01IGU)	P23975	SLC6A2	2.75691	1
D-00146	IUPHAR:5139|TTD:D01IGU|TTD:D0F1ZX|TTD:D0K6WI	APA (IUPHAR:5139)|APA (TTD:D01IGU)	P52732	KIF11	2.60648	2
D-00146	IUPHAR:5139|TTD:D01IGU|TTD:D0F1ZX|TTD:D0K6WI	APA (IUPHAR:5139)|APA (TTD:D01IGU)	P00918	CA2	2.51277	3
D-00146	IUPHAR:5139|TTD:D01IGU|TTD:D0F1ZX|TTD:D0K6WI	APA (IUPHAR:5139)|APA (TTD:D01IGU)	P30542	ADORA1	2.39584	4
D-00146	IUPHAR:5139|TTD:D01IGU|TTD:D0F1ZX|TTD:D0K6WI	APA (IUPHAR:5139)|APA (TTD:D01IGU)	O43570	CA12	2.24179	5
D-00146	IUPHAR:5139|TTD:D01IGU|TTD:D0F1ZX|TTD:D0K6WI	APA (IUPHAR:5139)|APA (TTD:D01IGU)	P31391	SSTR4	2.2286	6
D-00146	IUPHAR:5139|TTD:D01IGU|TTD:D0F1ZX|TTD:D0K6WI	APA (IUPHAR:5139)|APA (TTD:D01IGU)	Q9H4A4	RNPEP	2.20148	7
D-00146	IUPHAR:5139|TTD:D01IGU|TTD:D0F1ZX|TTD:D0K6WI	APA (IUPHAR:5139)|APA (TTD:D01IGU)	P07550	ADRB2	2.14551	8
D-00146	IUPHAR:5139|TTD:D01IGU|TTD:D0F1ZX|TTD:D0K6WI	APA (IUPHAR:5139)|APA (TTD:D01IGU)	P09960	LTA4H	2.1145	9
D-00146	IUPHAR:5139|TTD:D01IGU|TTD:D0F1ZX|TTD:D0K6WI	APA (IUPHAR:5139)|APA (TTD:D01IGU)	Q9UL62	TRPC5	2.09148	10
D-00146	IUPHAR:5139|TTD:D01IGU|TTD:D0F1ZX|TTD:D0K6WI	APA (IUPHAR:5139)|APA (TTD:D01IGU)	P29274	ADORA2A	2.02182	11
D-00146	IUPHAR:5139|TTD:D01IGU|TTD:D0F1ZX|TTD:D0K6WI	APA (IUPHAR:5139)|APA (TTD:D01IGU)	P0DMS8	ADORA3	2.00521	12
D-00146	IUPHAR:5139|TTD:D01IGU|TTD:D0F1ZX|TTD:D0K6WI	APA (IUPHAR:5139)|APA (TTD:D01IGU)	Q8TDS5	OXER1	1.95407	13
D-00146	IUPHAR:5139|TTD:D01IGU|TTD:D0F1ZX|TTD:D0K6WI	APA (IUPHAR:5139)|APA (TTD:D01IGU)	Q9Y5N1	HRH3	1.92873	14
D-00146	IUPHAR:5139|TTD:D01IGU|TTD:D0F1ZX|TTD:D0K6WI	APA (IUPHAR:5139)|APA (TTD:D01IGU)	P00734	F2	1.92074	15
D-00146	IUPHAR:5139|TTD:D01IGU|TTD:D0F1ZX|TTD:D0K6WI	APA (IUPHAR:5139)|APA (TTD:D01IGU)	P34913	EPHX2	1.91723	16
D-00146	IUPHAR:5139|TTD:D01IGU|TTD:D0F1ZX|TTD:D0K6WI	APA (IUPHAR:5139)|APA (TTD:D01IGU)	P14416	DRD2	1.83987	17
D-00146	IUPHAR:5139|TTD:D01IGU|TTD:D0F1ZX|TTD:D0K6WI	APA (IUPHAR:5139)|APA (TTD:D01IGU)	P08908	HTR1A	1.81021	18
D-00146	IUPHAR:5139|TTD:D01IGU|TTD:D0F1ZX|TTD:D0K6WI	APA (IUPHAR:5139)|APA (TTD:D01IGU)	P51582	P2RY4	1.75868	19
D-00146	IUPHAR:5139|TTD:D01IGU|TTD:D0F1ZX|TTD:D0K6WI	APA (IUPHAR:5139)|APA (TTD:D01IGU)	P14324	FDPS	1.69633	20
D-00146	IUPHAR:5139|TTD:D01IGU|TTD:D0F1ZX|TTD:D0K6WI	APA (IUPHAR:5139)|APA (TTD:D01IGU)	P11926	ODC1	0.959345	Known
D-00148	DrugBank:DB02079|IUPHAR:5136|TTD:D01BTV|TTD:D0L9AL	Aminooxyacetic acid (DrugBank:DB02079)|aminooxyacetic acid (IUPHAR:5136)|aminooxyacetic acid (TTD:D01BTV)	P83916	CBX1	2.32442	1
D-00148	DrugBank:DB02079|IUPHAR:5136|TTD:D01BTV|TTD:D0L9AL	Aminooxyacetic acid (DrugBank:DB02079)|aminooxyacetic acid (IUPHAR:5136)|aminooxyacetic acid (TTD:D01BTV)	Q9H9B1	EHMT1	1.95609	2
D-00148	DrugBank:DB02079|IUPHAR:5136|TTD:D01BTV|TTD:D0L9AL	Aminooxyacetic acid (DrugBank:DB02079)|aminooxyacetic acid (IUPHAR:5136)|aminooxyacetic acid (TTD:D01BTV)	O43570	CA12	1.77803	3
D-00148	DrugBank:DB02079|IUPHAR:5136|TTD:D01BTV|TTD:D0L9AL	Aminooxyacetic acid (DrugBank:DB02079)|aminooxyacetic acid (IUPHAR:5136)|aminooxyacetic acid (TTD:D01BTV)	P15121	AKR1B1	1.72065	4
D-00148	DrugBank:DB02079|IUPHAR:5136|TTD:D01BTV|TTD:D0L9AL	Aminooxyacetic acid (DrugBank:DB02079)|aminooxyacetic acid (IUPHAR:5136)|aminooxyacetic acid (TTD:D01BTV)	P32929	CTH	1.58483	Known
D-00148	DrugBank:DB02079|IUPHAR:5136|TTD:D01BTV|TTD:D0L9AL	Aminooxyacetic acid (DrugBank:DB02079)|aminooxyacetic acid (IUPHAR:5136)|aminooxyacetic acid (TTD:D01BTV)	P12821	ACE	1.45957	5
D-00148	DrugBank:DB02079|IUPHAR:5136|TTD:D01BTV|TTD:D0L9AL	Aminooxyacetic acid (DrugBank:DB02079)|aminooxyacetic acid (IUPHAR:5136)|aminooxyacetic acid (TTD:D01BTV)	P39748	FEN1	1.21507	6
D-00148	DrugBank:DB02079|IUPHAR:5136|TTD:D01BTV|TTD:D0L9AL	Aminooxyacetic acid (DrugBank:DB02079)|aminooxyacetic acid (IUPHAR:5136)|aminooxyacetic acid (TTD:D01BTV)	P00918	CA2	1.19567	7
D-00148	DrugBank:DB02079|IUPHAR:5136|TTD:D01BTV|TTD:D0L9AL	Aminooxyacetic acid (DrugBank:DB02079)|aminooxyacetic acid (IUPHAR:5136)|aminooxyacetic acid (TTD:D01BTV)	P00533	EGFR	1.14686	8
D-00148	DrugBank:DB02079|IUPHAR:5136|TTD:D01BTV|TTD:D0L9AL	Aminooxyacetic acid (DrugBank:DB02079)|aminooxyacetic acid (IUPHAR:5136)|aminooxyacetic acid (TTD:D01BTV)	P07202	TPO	1.03729	9
D-00148	DrugBank:DB02079|IUPHAR:5136|TTD:D01BTV|TTD:D0L9AL	Aminooxyacetic acid (DrugBank:DB02079)|aminooxyacetic acid (IUPHAR:5136)|aminooxyacetic acid (TTD:D01BTV)	P42574	CASP3	1.02357	10
D-00148	DrugBank:DB02079|IUPHAR:5136|TTD:D01BTV|TTD:D0L9AL	Aminooxyacetic acid (DrugBank:DB02079)|aminooxyacetic acid (IUPHAR:5136)|aminooxyacetic acid (TTD:D01BTV)	Q15722	LTB4R	1.01753	11
D-00148	DrugBank:DB02079|IUPHAR:5136|TTD:D01BTV|TTD:D0L9AL	Aminooxyacetic acid (DrugBank:DB02079)|aminooxyacetic acid (IUPHAR:5136)|aminooxyacetic acid (TTD:D01BTV)	Q16790	CA9	0.994697	12
D-00148	DrugBank:DB02079|IUPHAR:5136|TTD:D01BTV|TTD:D0L9AL	Aminooxyacetic acid (DrugBank:DB02079)|aminooxyacetic acid (IUPHAR:5136)|aminooxyacetic acid (TTD:D01BTV)	O75496	GMNN	0.982431	13
D-00148	DrugBank:DB02079|IUPHAR:5136|TTD:D01BTV|TTD:D0L9AL	Aminooxyacetic acid (DrugBank:DB02079)|aminooxyacetic acid (IUPHAR:5136)|aminooxyacetic acid (TTD:D01BTV)	P29466	CASP1	0.975366	14
D-00148	DrugBank:DB02079|IUPHAR:5136|TTD:D01BTV|TTD:D0L9AL	Aminooxyacetic acid (DrugBank:DB02079)|aminooxyacetic acid (IUPHAR:5136)|aminooxyacetic acid (TTD:D01BTV)	P35367	HRH1	0.96647	15
D-00148	DrugBank:DB02079|IUPHAR:5136|TTD:D01BTV|TTD:D0L9AL	Aminooxyacetic acid (DrugBank:DB02079)|aminooxyacetic acid (IUPHAR:5136)|aminooxyacetic acid (TTD:D01BTV)	P11926	ODC1	0.953139	16
D-00148	DrugBank:DB02079|IUPHAR:5136|TTD:D01BTV|TTD:D0L9AL	Aminooxyacetic acid (DrugBank:DB02079)|aminooxyacetic acid (IUPHAR:5136)|aminooxyacetic acid (TTD:D01BTV)	Q9Y5Y4	PTGDR2	0.932637	17
D-00148	DrugBank:DB02079|IUPHAR:5136|TTD:D01BTV|TTD:D0L9AL	Aminooxyacetic acid (DrugBank:DB02079)|aminooxyacetic acid (IUPHAR:5136)|aminooxyacetic acid (TTD:D01BTV)	Q15125	EBP	0.917927	18
D-00148	DrugBank:DB02079|IUPHAR:5136|TTD:D01BTV|TTD:D0L9AL	Aminooxyacetic acid (DrugBank:DB02079)|aminooxyacetic acid (IUPHAR:5136)|aminooxyacetic acid (TTD:D01BTV)	P06746	POLB	0.912509	19
D-00148	DrugBank:DB02079|IUPHAR:5136|TTD:D01BTV|TTD:D0L9AL	Aminooxyacetic acid (DrugBank:DB02079)|aminooxyacetic acid (IUPHAR:5136)|aminooxyacetic acid (TTD:D01BTV)	P35372	OPRM1	0.904168	20
D-00148	DrugBank:DB02079|IUPHAR:5136|TTD:D01BTV|TTD:D0L9AL	Aminooxyacetic acid (DrugBank:DB02079)|aminooxyacetic acid (IUPHAR:5136)|aminooxyacetic acid (TTD:D01BTV)	Q96KQ7	EHMT2	0.471723	Known
D-00148	DrugBank:DB02079|IUPHAR:5136|TTD:D01BTV|TTD:D0L9AL	Aminooxyacetic acid (DrugBank:DB02079)|aminooxyacetic acid (IUPHAR:5136)|aminooxyacetic acid (TTD:D01BTV)	P35520	CBS	0.0695604	Known
D-00151	DrugBank:DB11558|IUPHAR:5481|TTD:D0T0HH	Toluene (DrugBank:DB11558)|toluene (IUPHAR:5481)|toluene (TTD:D0T0HH)	P29466	CASP1	3.50049	1
D-00151	DrugBank:DB11558|IUPHAR:5481|TTD:D0T0HH	Toluene (DrugBank:DB11558)|toluene (IUPHAR:5481)|toluene (TTD:D0T0HH)	P14324	FDPS	3.00292	2
D-00151	DrugBank:DB11558|IUPHAR:5481|TTD:D0T0HH	Toluene (DrugBank:DB11558)|toluene (IUPHAR:5481)|toluene (TTD:D0T0HH)	P00748	F12	2.7291	3
D-00151	DrugBank:DB11558|IUPHAR:5481|TTD:D0T0HH	Toluene (DrugBank:DB11558)|toluene (IUPHAR:5481)|toluene (TTD:D0T0HH)	Q9Y5N1	HRH3	2.39659	4
D-00151	DrugBank:DB11558|IUPHAR:5481|TTD:D0T0HH	Toluene (DrugBank:DB11558)|toluene (IUPHAR:5481)|toluene (TTD:D0T0HH)	P22303	ACHE	2.38903	Known
D-00151	DrugBank:DB11558|IUPHAR:5481|TTD:D0T0HH	Toluene (DrugBank:DB11558)|toluene (IUPHAR:5481)|toluene (TTD:D0T0HH)	Q04844	CHRNE	2.35655	5
D-00151	DrugBank:DB11558|IUPHAR:5481|TTD:D0T0HH	Toluene (DrugBank:DB11558)|toluene (IUPHAR:5481)|toluene (TTD:D0T0HH)	O00748	CES2	2.18629	6
D-00151	DrugBank:DB11558|IUPHAR:5481|TTD:D0T0HH	Toluene (DrugBank:DB11558)|toluene (IUPHAR:5481)|toluene (TTD:D0T0HH)	P11229	CHRM1	2.11	7
D-00151	DrugBank:DB11558|IUPHAR:5481|TTD:D0T0HH	Toluene (DrugBank:DB11558)|toluene (IUPHAR:5481)|toluene (TTD:D0T0HH)	P08172	CHRM2	2.08802	8
D-00151	DrugBank:DB11558|IUPHAR:5481|TTD:D0T0HH	Toluene (DrugBank:DB11558)|toluene (IUPHAR:5481)|toluene (TTD:D0T0HH)	P56817	BACE1	1.9805	9
D-00151	DrugBank:DB11558|IUPHAR:5481|TTD:D0T0HH	Toluene (DrugBank:DB11558)|toluene (IUPHAR:5481)|toluene (TTD:D0T0HH)	P23141	CES1	1.9558	10
D-00151	DrugBank:DB11558|IUPHAR:5481|TTD:D0T0HH	Toluene (DrugBank:DB11558)|toluene (IUPHAR:5481)|toluene (TTD:D0T0HH)	P41594	GRM5	1.70949	11
D-00151	DrugBank:DB11558|IUPHAR:5481|TTD:D0T0HH	Toluene (DrugBank:DB11558)|toluene (IUPHAR:5481)|toluene (TTD:D0T0HH)	Q13639	HTR4	1.69253	12
D-00151	DrugBank:DB11558|IUPHAR:5481|TTD:D0T0HH	Toluene (DrugBank:DB11558)|toluene (IUPHAR:5481)|toluene (TTD:D0T0HH)	Q9NY33	DPP3	1.59738	13
D-00151	DrugBank:DB11558|IUPHAR:5481|TTD:D0T0HH	Toluene (DrugBank:DB11558)|toluene (IUPHAR:5481)|toluene (TTD:D0T0HH)	P05067	APP	1.5299	14
D-00151	DrugBank:DB11558|IUPHAR:5481|TTD:D0T0HH	Toluene (DrugBank:DB11558)|toluene (IUPHAR:5481)|toluene (TTD:D0T0HH)	P43681	CHRNA4	1.44003	15
D-00151	DrugBank:DB11558|IUPHAR:5481|TTD:D0T0HH	Toluene (DrugBank:DB11558)|toluene (IUPHAR:5481)|toluene (TTD:D0T0HH)	P00918	CA2	1.42997	16
D-00151	DrugBank:DB11558|IUPHAR:5481|TTD:D0T0HH	Toluene (DrugBank:DB11558)|toluene (IUPHAR:5481)|toluene (TTD:D0T0HH)	P23975	SLC6A2	1.35108	17
D-00151	DrugBank:DB11558|IUPHAR:5481|TTD:D0T0HH	Toluene (DrugBank:DB11558)|toluene (IUPHAR:5481)|toluene (TTD:D0T0HH)	P83916	CBX1	1.29725	18
D-00151	DrugBank:DB11558|IUPHAR:5481|TTD:D0T0HH	Toluene (DrugBank:DB11558)|toluene (IUPHAR:5481)|toluene (TTD:D0T0HH)	P00915	CA1	1.26863	19
D-00151	DrugBank:DB11558|IUPHAR:5481|TTD:D0T0HH	Toluene (DrugBank:DB11558)|toluene (IUPHAR:5481)|toluene (TTD:D0T0HH)	Q9Y5S8	NOX1	1.20499	20
D-00158	DrugBank:DB03255|KEGG:D00033|KEGG:D06534	Phenol (DrugBank:DB03255)|Phenol (JP17/USP) (KEGG:D00033)|Phenolated water (JP17) (KEGG:D06534)	O75493	CA11	3.24413	1
D-00158	DrugBank:DB03255|KEGG:D00033|KEGG:D06534	Phenol (DrugBank:DB03255)|Phenol (JP17/USP) (KEGG:D00033)|Phenolated water (JP17) (KEGG:D06534)	O75608	LYPLA1	2.6212	2
D-00158	DrugBank:DB03255|KEGG:D00033|KEGG:D06534	Phenol (DrugBank:DB03255)|Phenol (JP17/USP) (KEGG:D00033)|Phenolated water (JP17) (KEGG:D06534)	P11511	CYP19A1	2.25281	3
D-00158	DrugBank:DB03255|KEGG:D00033|KEGG:D06534	Phenol (DrugBank:DB03255)|Phenol (JP17/USP) (KEGG:D00033)|Phenolated water (JP17) (KEGG:D06534)	O95372	LYPLA2	2.12918	4
D-00158	DrugBank:DB03255|KEGG:D00033|KEGG:D06534	Phenol (DrugBank:DB03255)|Phenol (JP17/USP) (KEGG:D00033)|Phenolated water (JP17) (KEGG:D06534)	P00915	CA1	2.04587	Known
D-00158	DrugBank:DB03255|KEGG:D00033|KEGG:D06534	Phenol (DrugBank:DB03255)|Phenol (JP17/USP) (KEGG:D00033)|Phenolated water (JP17) (KEGG:D06534)	Q9NY33	DPP3	1.95945	5
D-00158	DrugBank:DB03255|KEGG:D00033|KEGG:D06534	Phenol (DrugBank:DB03255)|Phenol (JP17/USP) (KEGG:D00033)|Phenolated water (JP17) (KEGG:D06534)	P05067	APP	1.88778	6
D-00158	DrugBank:DB03255|KEGG:D00033|KEGG:D06534	Phenol (DrugBank:DB03255)|Phenol (JP17/USP) (KEGG:D00033)|Phenolated water (JP17) (KEGG:D06534)	P22748	CA4	1.87978	Known
D-00158	DrugBank:DB03255|KEGG:D00033|KEGG:D06534	Phenol (DrugBank:DB03255)|Phenol (JP17/USP) (KEGG:D00033)|Phenolated water (JP17) (KEGG:D06534)	P61073	CXCR4	1.65687	7
D-00158	DrugBank:DB03255|KEGG:D00033|KEGG:D06534	Phenol (DrugBank:DB03255)|Phenol (JP17/USP) (KEGG:D00033)|Phenolated water (JP17) (KEGG:D06534)	P53779	MAPK10	1.6268	8
D-00158	DrugBank:DB03255|KEGG:D00033|KEGG:D06534	Phenol (DrugBank:DB03255)|Phenol (JP17/USP) (KEGG:D00033)|Phenolated water (JP17) (KEGG:D06534)	P05121	SERPINE1	1.50142	9
D-00158	DrugBank:DB03255|KEGG:D00033|KEGG:D06534	Phenol (DrugBank:DB03255)|Phenol (JP17/USP) (KEGG:D00033)|Phenolated water (JP17) (KEGG:D06534)	Q16539	MAPK14	1.44944	10
D-00158	DrugBank:DB03255|KEGG:D00033|KEGG:D06534	Phenol (DrugBank:DB03255)|Phenol (JP17/USP) (KEGG:D00033)|Phenolated water (JP17) (KEGG:D06534)	P41143	OPRD1	1.44872	11
D-00158	DrugBank:DB03255|KEGG:D00033|KEGG:D06534	Phenol (DrugBank:DB03255)|Phenol (JP17/USP) (KEGG:D00033)|Phenolated water (JP17) (KEGG:D06534)	P41145	OPRK1	1.42923	12
D-00158	DrugBank:DB03255|KEGG:D00033|KEGG:D06534	Phenol (DrugBank:DB03255)|Phenol (JP17/USP) (KEGG:D00033)|Phenolated water (JP17) (KEGG:D06534)	P37058	HSD17B3	1.36921	13
D-00158	DrugBank:DB03255|KEGG:D00033|KEGG:D06534	Phenol (DrugBank:DB03255)|Phenol (JP17/USP) (KEGG:D00033)|Phenolated water (JP17) (KEGG:D06534)	P28715	ERCC5	1.33538	14
D-00158	DrugBank:DB03255|KEGG:D00033|KEGG:D06534	Phenol (DrugBank:DB03255)|Phenol (JP17/USP) (KEGG:D00033)|Phenolated water (JP17) (KEGG:D06534)	P00533	EGFR	1.30507	15
D-00158	DrugBank:DB03255|KEGG:D00033|KEGG:D06534	Phenol (DrugBank:DB03255)|Phenol (JP17/USP) (KEGG:D00033)|Phenolated water (JP17) (KEGG:D06534)	P14061	HSD17B1	1.28405	16
D-00158	DrugBank:DB03255|KEGG:D00033|KEGG:D06534	Phenol (DrugBank:DB03255)|Phenol (JP17/USP) (KEGG:D00033)|Phenolated water (JP17) (KEGG:D06534)	P00918	CA2	1.26146	Known
D-00158	DrugBank:DB03255|KEGG:D00033|KEGG:D06534	Phenol (DrugBank:DB03255)|Phenol (JP17/USP) (KEGG:D00033)|Phenolated water (JP17) (KEGG:D06534)	P23280	CA6	1.22584	Known
D-00158	DrugBank:DB03255|KEGG:D00033|KEGG:D06534	Phenol (DrugBank:DB03255)|Phenol (JP17/USP) (KEGG:D00033)|Phenolated water (JP17) (KEGG:D06534)	P22303	ACHE	1.19485	17
D-00158	DrugBank:DB03255|KEGG:D00033|KEGG:D06534	Phenol (DrugBank:DB03255)|Phenol (JP17/USP) (KEGG:D00033)|Phenolated water (JP17) (KEGG:D06534)	Q16678	CYP1B1	1.18339	18
D-00158	DrugBank:DB03255|KEGG:D00033|KEGG:D06534	Phenol (DrugBank:DB03255)|Phenol (JP17/USP) (KEGG:D00033)|Phenolated water (JP17) (KEGG:D06534)	P35372	OPRM1	1.16675	19
D-00158	DrugBank:DB03255|KEGG:D00033|KEGG:D06534	Phenol (DrugBank:DB03255)|Phenol (JP17/USP) (KEGG:D00033)|Phenolated water (JP17) (KEGG:D06534)	P27695	APEX1	1.09669	20
D-00158	DrugBank:DB03255|KEGG:D00033|KEGG:D06534	Phenol (DrugBank:DB03255)|Phenol (JP17/USP) (KEGG:D00033)|Phenolated water (JP17) (KEGG:D06534)	Q16790	CA9	0.349329	Known
D-00158	DrugBank:DB03255|KEGG:D00033|KEGG:D06534	Phenol (DrugBank:DB03255)|Phenol (JP17/USP) (KEGG:D00033)|Phenolated water (JP17) (KEGG:D06534)	P07451	CA3	0.212756	Known
D-00158	DrugBank:DB03255|KEGG:D00033|KEGG:D06534	Phenol (DrugBank:DB03255)|Phenol (JP17/USP) (KEGG:D00033)|Phenolated water (JP17) (KEGG:D06534)	O43570	CA12	0.0799166	Known
D-00159	TTD:D07PYV		P14324	FDPS	3.04657	1
D-00159	TTD:D07PYV		P29274	ADORA2A	2.74739	2
D-00159	TTD:D07PYV		P00374	DHFR	2.71849	3
D-00159	TTD:D07PYV		P30542	ADORA1	2.65996	4
D-00159	TTD:D07PYV		O00519	FAAH	2.37602	5
D-00159	TTD:D07PYV		Q9H237	PORCN	2.27106	6
D-00159	TTD:D07PYV		P34913	EPHX2	2.15869	7
D-00159	TTD:D07PYV		O94760	DDAH1	2.13072	8
D-00159	TTD:D07PYV		P29275	ADORA2B	1.95956	9
D-00159	TTD:D07PYV		P41594	GRM5	1.9479	10
D-00159	TTD:D07PYV		P19099	CYP11B2	1.77633	11
D-00159	TTD:D07PYV		P00742	F10	1.74082	12
D-00159	TTD:D07PYV		P35228	NOS2	1.74043	Known
D-00159	TTD:D07PYV		Q14833	GRM4	1.72915	13
D-00159	TTD:D07PYV		O43570	CA12	1.72571	14
D-00159	TTD:D07PYV		P05067	APP	1.71669	15
D-00159	TTD:D07PYV		P78527	PRKDC	1.69412	16
D-00159	TTD:D07PYV		P29474	NOS3	1.69063	Known
D-00159	TTD:D07PYV		P11137	MAP2	1.66026	17
D-00159	TTD:D07PYV		Q16790	CA9	1.65335	18
D-00159	TTD:D07PYV		P00390	GSR	1.58507	19
D-00159	TTD:D07PYV		Q16602	CALCRL	1.57391	20
D-00159	TTD:D07PYV		P29475	NOS1	1.26192	Known
D-00159	TTD:D07PYV		Q9BTU6	PI4K2A	0.223874	Known
D-00160	DrugBank:DB06637|IUPHAR:2416|KEGG:D04127|TTD:D08YIN	Dalfampridine (DrugBank:DB06637)|fampridine (IUPHAR:2416)|Dalfampridine (USAN) (KEGG:D04127)|Dalfampridine (TTD:D08YIN)	P21728	DRD1	3.87486	1
D-00160	DrugBank:DB06637|IUPHAR:2416|KEGG:D04127|TTD:D08YIN	Dalfampridine (DrugBank:DB06637)|fampridine (IUPHAR:2416)|Dalfampridine (USAN) (KEGG:D04127)|Dalfampridine (TTD:D08YIN)	P05981	HPN	3.39709	2
D-00160	DrugBank:DB06637|IUPHAR:2416|KEGG:D04127|TTD:D08YIN	Dalfampridine (DrugBank:DB06637)|fampridine (IUPHAR:2416)|Dalfampridine (USAN) (KEGG:D04127)|Dalfampridine (TTD:D08YIN)	P08173	CHRM4	3.21055	3
D-00160	DrugBank:DB06637|IUPHAR:2416|KEGG:D04127|TTD:D08YIN	Dalfampridine (DrugBank:DB06637)|fampridine (IUPHAR:2416)|Dalfampridine (USAN) (KEGG:D04127)|Dalfampridine (TTD:D08YIN)	P11229	CHRM1	2.87604	4
D-00160	DrugBank:DB06637|IUPHAR:2416|KEGG:D04127|TTD:D08YIN	Dalfampridine (DrugBank:DB06637)|fampridine (IUPHAR:2416)|Dalfampridine (USAN) (KEGG:D04127)|Dalfampridine (TTD:D08YIN)	P08912	CHRM5	2.84279	5
D-00160	DrugBank:DB06637|IUPHAR:2416|KEGG:D04127|TTD:D08YIN	Dalfampridine (DrugBank:DB06637)|fampridine (IUPHAR:2416)|Dalfampridine (USAN) (KEGG:D04127)|Dalfampridine (TTD:D08YIN)	P20309	CHRM3	2.8307	6
D-00160	DrugBank:DB06637|IUPHAR:2416|KEGG:D04127|TTD:D08YIN	Dalfampridine (DrugBank:DB06637)|fampridine (IUPHAR:2416)|Dalfampridine (USAN) (KEGG:D04127)|Dalfampridine (TTD:D08YIN)	P31645	SLC6A4	2.23803	7
D-00160	DrugBank:DB06637|IUPHAR:2416|KEGG:D04127|TTD:D08YIN	Dalfampridine (DrugBank:DB06637)|fampridine (IUPHAR:2416)|Dalfampridine (USAN) (KEGG:D04127)|Dalfampridine (TTD:D08YIN)	P41595	HTR2B	1.93228	8
D-00160	DrugBank:DB06637|IUPHAR:2416|KEGG:D04127|TTD:D08YIN	Dalfampridine (DrugBank:DB06637)|fampridine (IUPHAR:2416)|Dalfampridine (USAN) (KEGG:D04127)|Dalfampridine (TTD:D08YIN)	P35348	ADRA1A	1.74676	9
D-00160	DrugBank:DB06637|IUPHAR:2416|KEGG:D04127|TTD:D08YIN	Dalfampridine (DrugBank:DB06637)|fampridine (IUPHAR:2416)|Dalfampridine (USAN) (KEGG:D04127)|Dalfampridine (TTD:D08YIN)	Q12809	KCNH2	1.70615	10
D-00160	DrugBank:DB06637|IUPHAR:2416|KEGG:D04127|TTD:D08YIN	Dalfampridine (DrugBank:DB06637)|fampridine (IUPHAR:2416)|Dalfampridine (USAN) (KEGG:D04127)|Dalfampridine (TTD:D08YIN)	P35462	DRD3	1.65314	11
D-00160	DrugBank:DB06637|IUPHAR:2416|KEGG:D04127|TTD:D08YIN	Dalfampridine (DrugBank:DB06637)|fampridine (IUPHAR:2416)|Dalfampridine (USAN) (KEGG:D04127)|Dalfampridine (TTD:D08YIN)	P19099	CYP11B2	1.64629	12
D-00160	DrugBank:DB06637|IUPHAR:2416|KEGG:D04127|TTD:D08YIN	Dalfampridine (DrugBank:DB06637)|fampridine (IUPHAR:2416)|Dalfampridine (USAN) (KEGG:D04127)|Dalfampridine (TTD:D08YIN)	Q13639	HTR4	1.62682	13
D-00160	DrugBank:DB06637|IUPHAR:2416|KEGG:D04127|TTD:D08YIN	Dalfampridine (DrugBank:DB06637)|fampridine (IUPHAR:2416)|Dalfampridine (USAN) (KEGG:D04127)|Dalfampridine (TTD:D08YIN)	P16066	NPR1	1.62219	14
D-00160	DrugBank:DB06637|IUPHAR:2416|KEGG:D04127|TTD:D08YIN	Dalfampridine (DrugBank:DB06637)|fampridine (IUPHAR:2416)|Dalfampridine (USAN) (KEGG:D04127)|Dalfampridine (TTD:D08YIN)	P08172	CHRM2	1.61502	15
D-00160	DrugBank:DB06637|IUPHAR:2416|KEGG:D04127|TTD:D08YIN	Dalfampridine (DrugBank:DB06637)|fampridine (IUPHAR:2416)|Dalfampridine (USAN) (KEGG:D04127)|Dalfampridine (TTD:D08YIN)	P18089	ADRA2B	1.56772	16
D-00160	DrugBank:DB06637|IUPHAR:2416|KEGG:D04127|TTD:D08YIN	Dalfampridine (DrugBank:DB06637)|fampridine (IUPHAR:2416)|Dalfampridine (USAN) (KEGG:D04127)|Dalfampridine (TTD:D08YIN)	P12104	FABP2	1.52569	17
D-00160	DrugBank:DB06637|IUPHAR:2416|KEGG:D04127|TTD:D08YIN	Dalfampridine (DrugBank:DB06637)|fampridine (IUPHAR:2416)|Dalfampridine (USAN) (KEGG:D04127)|Dalfampridine (TTD:D08YIN)	P50406	HTR6	1.45634	18
D-00160	DrugBank:DB06637|IUPHAR:2416|KEGG:D04127|TTD:D08YIN	Dalfampridine (DrugBank:DB06637)|fampridine (IUPHAR:2416)|Dalfampridine (USAN) (KEGG:D04127)|Dalfampridine (TTD:D08YIN)	P83916	CBX1	1.36567	19
D-00160	DrugBank:DB06637|IUPHAR:2416|KEGG:D04127|TTD:D08YIN	Dalfampridine (DrugBank:DB06637)|fampridine (IUPHAR:2416)|Dalfampridine (USAN) (KEGG:D04127)|Dalfampridine (TTD:D08YIN)	P42785	PRCP	1.35297	20
D-00160	DrugBank:DB06637|IUPHAR:2416|KEGG:D04127|TTD:D08YIN	Dalfampridine (DrugBank:DB06637)|fampridine (IUPHAR:2416)|Dalfampridine (USAN) (KEGG:D04127)|Dalfampridine (TTD:D08YIN)	P16473	TSHR	1.12498	Known
D-00160	DrugBank:DB06637|IUPHAR:2416|KEGG:D04127|TTD:D08YIN	Dalfampridine (DrugBank:DB06637)|fampridine (IUPHAR:2416)|Dalfampridine (USAN) (KEGG:D04127)|Dalfampridine (TTD:D08YIN)	P10635	CYP2D6	1.02012	Known
D-00164	TTD:D00FGA		P14091	CTSE	3.15062	1
D-00164	TTD:D00FGA		P17655	CAPN2	3.13207	2
D-00164	TTD:D00FGA		Q9UBR2	CTSZ	3	3
D-00164	TTD:D00FGA		P00797	REN	2.91898	4
D-00164	TTD:D00FGA		P07339	CTSD	2.76203	5
D-00164	TTD:D00FGA		O60911	CTSV	2.39964	6
D-00164	TTD:D00FGA		Q13443	ADAM9	2.385	7
D-00164	TTD:D00FGA		P0DJD9	PGA5	2.11384	8
D-00164	TTD:D00FGA		P23946	CMA1	2.10322	9
D-00164	TTD:D00FGA		P14416	DRD2	1.86301	10
D-00164	TTD:D00FGA		P09668	CTSH	1.83827	11
D-00164	TTD:D00FGA		Q9UNI1	CELA1	1.80705	12
D-00164	TTD:D00FGA		P43235	CTSK	1.80551	Known
D-00164	TTD:D00FGA		P25774	CTSS	1.7956	13
D-00164	TTD:D00FGA		P08246	ELANE	1.74948	14
D-00164	TTD:D00FGA		P10275	AR	1.68096	15
D-00164	TTD:D00FGA		Q9Y5N1	HRH3	1.66109	16
D-00164	TTD:D00FGA		Q9UBX1	CTSF	1.57867	17
D-00164	TTD:D00FGA		P20618	PSMB1	1.55483	18
D-00164	TTD:D00FGA		P35462	DRD3	1.46632	19
D-00164	TTD:D00FGA		Q13639	HTR4	1.4636	20
D-00164	TTD:D00FGA		P07711	CTSL	1.04098	Known
D-00168	TTD:D0J7NS		P25103	TACR1	2.93199	1
D-00168	TTD:D0J7NS		Q9Y2I1	NISCH	2.62132	2
D-00168	TTD:D0J7NS		P08913	ADRA2A	2.48498	3
D-00168	TTD:D0J7NS		P00918	CA2	2.33457	4
D-00168	TTD:D0J7NS		O94760	DDAH1	2.27849	5
D-00168	TTD:D0J7NS		P30542	ADORA1	2.18791	6
D-00168	TTD:D0J7NS		P03956	MMP1	2.16392	7
D-00168	TTD:D0J7NS		P14780	MMP9	2.03984	8
D-00168	TTD:D0J7NS		P09237	MMP7	1.95958	9
D-00168	TTD:D0J7NS		P49286	MTNR1B	1.9425	10
D-00168	TTD:D0J7NS		P28845	HSD11B1	1.94076	11
D-00168	TTD:D0J7NS		P08253	MMP2	1.92414	12
D-00168	TTD:D0J7NS		P22894	MMP8	1.87527	13
D-00168	TTD:D0J7NS		P09960	LTA4H	1.85344	14
D-00168	TTD:D0J7NS		Q04609	FOLH1	1.8242	15
D-00168	TTD:D0J7NS		P41143	OPRD1	1.77566	16
D-00168	TTD:D0J7NS		P39900	MMP12	1.76911	17
D-00168	TTD:D0J7NS		P08254	MMP3	1.74736	18
D-00168	TTD:D0J7NS		P35372	OPRM1	1.74459	19
D-00168	TTD:D0J7NS		P10275	AR	1.72752	20
D-00168	TTD:D0J7NS		P35228	NOS2	1.25659	Known
D-00168	TTD:D0J7NS		P29475	NOS1	1.14961	Known
D-00168	TTD:D0J7NS		P29474	NOS3	0.538408	Known
D-00169	TTD:D0D9LT		O94760	DDAH1	2.27849	1
D-00169	TTD:D0D9LT		P35372	OPRM1	2.15843	2
D-00169	TTD:D0D9LT		P49286	MTNR1B	2.11484	3
D-00169	TTD:D0D9LT		P09960	LTA4H	2.10421	4
D-00169	TTD:D0D9LT		Q9UBN7	HDAC6	2.06562	5
D-00169	TTD:D0D9LT		P00918	CA2	1.95769	6
D-00169	TTD:D0D9LT		P12821	ACE	1.93887	7
D-00169	TTD:D0D9LT		P00734	F2	1.86923	8
D-00169	TTD:D0D9LT		Q16790	CA9	1.76453	9
D-00169	TTD:D0D9LT		Q13547	HDAC1	1.73858	10
D-00169	TTD:D0D9LT		P27487	DPP4	1.73356	11
D-00169	TTD:D0D9LT		P34913	EPHX2	1.72452	12
D-00169	TTD:D0D9LT		Q8NER1	TRPV1	1.72231	13
D-00169	TTD:D0D9LT		P11137	MAP2	1.66026	14
D-00169	TTD:D0D9LT		P28845	HSD11B1	1.62185	15
D-00169	TTD:D0D9LT		Q92769	HDAC2	1.61017	16
D-00169	TTD:D0D9LT		O43570	CA12	1.60892	17
D-00169	TTD:D0D9LT		P10275	AR	1.57759	18
D-00169	TTD:D0D9LT		P30542	ADORA1	1.56155	19
D-00169	TTD:D0D9LT		Q9Y2I1	NISCH	1.53027	20
D-00169	TTD:D0D9LT		P35228	NOS2	1.1284	Known
D-00169	TTD:D0D9LT		P29475	NOS1	0.852037	Known
D-00169	TTD:D0D9LT		P29474	NOS3	0.550383	Known
D-00170	TTD:D0X6MB		Q9Y5Z0	BACE2	3.17205	1
D-00170	TTD:D0X6MB		P56817	BACE1	2.68201	2
D-00170	TTD:D0X6MB		P30542	ADORA1	2.65985	3
D-00170	TTD:D0X6MB		P28845	HSD11B1	2.65828	4
D-00170	TTD:D0X6MB		Q9Y2I1	NISCH	2.62132	5
D-00170	TTD:D0X6MB		P12821	ACE	2.61826	6
D-00170	TTD:D0X6MB		P06756	ITGAV	2.4873	7
D-00170	TTD:D0X6MB		P08913	ADRA2A	2.48498	8
D-00170	TTD:D0X6MB		P22894	MMP8	2.38235	9
D-00170	TTD:D0X6MB		P09958	FURIN	2.35974	10
D-00170	TTD:D0X6MB		P00918	CA2	2.3125	11
D-00170	TTD:D0X6MB		O94760	DDAH1	2.27849	12
D-00170	TTD:D0X6MB		P10275	AR	2.22668	13
D-00170	TTD:D0X6MB		P07339	CTSD	2.20486	14
D-00170	TTD:D0X6MB		P07477	PRSS1	2.0811	15
D-00170	TTD:D0X6MB		Q9GZQ6	NPFFR1	2.03484	16
D-00170	TTD:D0X6MB		P00734	F2	2.03387	17
D-00170	TTD:D0X6MB		P49286	MTNR1B	1.95874	18
D-00170	TTD:D0X6MB		P32245	MC4R	1.85323	19
D-00170	TTD:D0X6MB		P41143	OPRD1	1.83539	20
D-00170	TTD:D0X6MB		P29475	NOS1	1.36527	Known
D-00170	TTD:D0X6MB		P35228	NOS2	1.18675	Known
D-00170	TTD:D0X6MB		P29474	NOS3	0.538408	Known
D-00171	TTD:D0D0TO		P00918	CA2	2.69722	1
D-00171	TTD:D0D0TO		Q9UBN7	HDAC6	2.39837	2
D-00171	TTD:D0D0TO		Q9Y2I1	NISCH	2.37987	3
D-00171	TTD:D0D0TO		Q16790	CA9	2.29447	4
D-00171	TTD:D0D0TO		O94760	DDAH1	2.27849	5
D-00171	TTD:D0D0TO		Q9UBY5	LPAR3	2.18915	6
D-00171	TTD:D0D0TO		P06756	ITGAV	2.18586	7
D-00171	TTD:D0D0TO		P09958	FURIN	2.06536	8
D-00171	TTD:D0D0TO		Q8NER1	TRPV1	1.89072	9
D-00171	TTD:D0D0TO		P08913	ADRA2A	1.8436	10
D-00171	TTD:D0D0TO		Q9GZQ6	NPFFR1	1.75833	11
D-00171	TTD:D0D0TO		Q13547	HDAC1	1.73895	12
D-00171	TTD:D0D0TO		P35372	OPRM1	1.73255	13
D-00171	TTD:D0D0TO		O15379	HDAC3	1.67454	14
D-00171	TTD:D0D0TO		O43570	CA12	1.66908	15
D-00171	TTD:D0D0TO		P11137	MAP2	1.66026	16
D-00171	TTD:D0D0TO		P34913	EPHX2	1.58219	17
D-00171	TTD:D0D0TO		Q9Y5X5	NPFFR2	1.51879	18
D-00171	TTD:D0D0TO		P23141	CES1	1.44356	19
D-00171	TTD:D0D0TO		Q15661	TPSAB1	1.44253	20
D-00171	TTD:D0D0TO		P29475	NOS1	1.04001	Known
D-00171	TTD:D0D0TO		P29474	NOS3	0.714358	Known
D-00171	TTD:D0D0TO		P35228	NOS2	0.464334	Known
D-00178	IUPHAR:2420|KEGG:D02818|TTD:D0BQ8Y	allyl isothiocyanate (IUPHAR:2420)|Allyl isothiocyanate (USP) (KEGG:D02818)	P21453	S1PR1	2.62864	1
D-00178	IUPHAR:2420|KEGG:D02818|TTD:D0BQ8Y	allyl isothiocyanate (IUPHAR:2420)|Allyl isothiocyanate (USP) (KEGG:D02818)	P41143	OPRD1	2.38629	2
D-00178	IUPHAR:2420|KEGG:D02818|TTD:D0BQ8Y	allyl isothiocyanate (IUPHAR:2420)|Allyl isothiocyanate (USP) (KEGG:D02818)	P48449	LSS	2.02941	3
D-00178	IUPHAR:2420|KEGG:D02818|TTD:D0BQ8Y	allyl isothiocyanate (IUPHAR:2420)|Allyl isothiocyanate (USP) (KEGG:D02818)	P21554	CNR1	2.02904	4
D-00178	IUPHAR:2420|KEGG:D02818|TTD:D0BQ8Y	allyl isothiocyanate (IUPHAR:2420)|Allyl isothiocyanate (USP) (KEGG:D02818)	Q12809	KCNH2	2.00583	5
D-00178	IUPHAR:2420|KEGG:D02818|TTD:D0BQ8Y	allyl isothiocyanate (IUPHAR:2420)|Allyl isothiocyanate (USP) (KEGG:D02818)	O95977	S1PR4	1.83001	6
D-00178	IUPHAR:2420|KEGG:D02818|TTD:D0BQ8Y	allyl isothiocyanate (IUPHAR:2420)|Allyl isothiocyanate (USP) (KEGG:D02818)	P35372	OPRM1	1.81549	7
D-00178	IUPHAR:2420|KEGG:D02818|TTD:D0BQ8Y	allyl isothiocyanate (IUPHAR:2420)|Allyl isothiocyanate (USP) (KEGG:D02818)	Q7Z2W7	TRPM8	1.75309	8
D-00178	IUPHAR:2420|KEGG:D02818|TTD:D0BQ8Y	allyl isothiocyanate (IUPHAR:2420)|Allyl isothiocyanate (USP) (KEGG:D02818)	Q9Y5X9	LIPG	1.69303	9
D-00178	IUPHAR:2420|KEGG:D02818|TTD:D0BQ8Y	allyl isothiocyanate (IUPHAR:2420)|Allyl isothiocyanate (USP) (KEGG:D02818)	P00734	F2	1.57566	10
D-00178	IUPHAR:2420|KEGG:D02818|TTD:D0BQ8Y	allyl isothiocyanate (IUPHAR:2420)|Allyl isothiocyanate (USP) (KEGG:D02818)	Q8NER1	TRPV1	1.57224	Known
D-00178	IUPHAR:2420|KEGG:D02818|TTD:D0BQ8Y	allyl isothiocyanate (IUPHAR:2420)|Allyl isothiocyanate (USP) (KEGG:D02818)	Q14330	GPR18	1.55129	11
D-00178	IUPHAR:2420|KEGG:D02818|TTD:D0BQ8Y	allyl isothiocyanate (IUPHAR:2420)|Allyl isothiocyanate (USP) (KEGG:D02818)	Q9Y2T6	GPR55	1.49965	12
D-00178	IUPHAR:2420|KEGG:D02818|TTD:D0BQ8Y	allyl isothiocyanate (IUPHAR:2420)|Allyl isothiocyanate (USP) (KEGG:D02818)	Q9H2X9	SLC12A5	1.43705	13
D-00178	IUPHAR:2420|KEGG:D02818|TTD:D0BQ8Y	allyl isothiocyanate (IUPHAR:2420)|Allyl isothiocyanate (USP) (KEGG:D02818)	P00352	ALDH1A1	1.41872	14
D-00178	IUPHAR:2420|KEGG:D02818|TTD:D0BQ8Y	allyl isothiocyanate (IUPHAR:2420)|Allyl isothiocyanate (USP) (KEGG:D02818)	Q9Y5N1	HRH3	1.39146	15
D-00178	IUPHAR:2420|KEGG:D02818|TTD:D0BQ8Y	allyl isothiocyanate (IUPHAR:2420)|Allyl isothiocyanate (USP) (KEGG:D02818)	P14174	MIF	1.28211	Known
D-00178	IUPHAR:2420|KEGG:D02818|TTD:D0BQ8Y	allyl isothiocyanate (IUPHAR:2420)|Allyl isothiocyanate (USP) (KEGG:D02818)	P14416	DRD2	1.25043	16
D-00178	IUPHAR:2420|KEGG:D02818|TTD:D0BQ8Y	allyl isothiocyanate (IUPHAR:2420)|Allyl isothiocyanate (USP) (KEGG:D02818)	P34972	CNR2	1.19176	17
D-00178	IUPHAR:2420|KEGG:D02818|TTD:D0BQ8Y	allyl isothiocyanate (IUPHAR:2420)|Allyl isothiocyanate (USP) (KEGG:D02818)	Q99720	SIGMAR1	1.18832	18
D-00178	IUPHAR:2420|KEGG:D02818|TTD:D0BQ8Y	allyl isothiocyanate (IUPHAR:2420)|Allyl isothiocyanate (USP) (KEGG:D02818)	P08913	ADRA2A	1.13367	19
D-00178	IUPHAR:2420|KEGG:D02818|TTD:D0BQ8Y	allyl isothiocyanate (IUPHAR:2420)|Allyl isothiocyanate (USP) (KEGG:D02818)	P41145	OPRK1	1.07268	20
D-00178	IUPHAR:2420|KEGG:D02818|TTD:D0BQ8Y	allyl isothiocyanate (IUPHAR:2420)|Allyl isothiocyanate (USP) (KEGG:D02818)	O75762	TRPA1	0.680863	Known
D-00187	TTD:D0M4BM		P56817	BACE1	2.82722	1
D-00187	TTD:D0M4BM		Q9Y5Z0	BACE2	2.82327	2
D-00187	TTD:D0M4BM		P00918	CA2	2.5941	3
D-00187	TTD:D0M4BM		Q15722	LTB4R	2.49952	4
D-00187	TTD:D0M4BM		Q9Y5N1	HRH3	2.37291	5
D-00187	TTD:D0M4BM		Q9Y2I1	NISCH	2.31367	6
D-00187	TTD:D0M4BM		O94760	DDAH1	2.27849	7
D-00187	TTD:D0M4BM		P34913	EPHX2	2.20943	8
D-00187	TTD:D0M4BM		Q9UBY5	LPAR3	2.18915	9
D-00187	TTD:D0M4BM		P06756	ITGAV	1.9331	10
D-00187	TTD:D0M4BM		P00797	REN	1.89782	11
D-00187	TTD:D0M4BM		P09958	FURIN	1.79604	12
D-00187	TTD:D0M4BM		P18089	ADRA2B	1.79349	13
D-00187	TTD:D0M4BM		P18825	ADRA2C	1.7459	14
D-00187	TTD:D0M4BM		Q07869	PPARA	1.73159	15
D-00187	TTD:D0M4BM		Q16790	CA9	1.71128	16
D-00187	TTD:D0M4BM		P11137	MAP2	1.66026	17
D-00187	TTD:D0M4BM		P08913	ADRA2A	1.53701	18
D-00187	TTD:D0M4BM		O00519	FAAH	1.53624	19
D-00187	TTD:D0M4BM		P41143	OPRD1	1.52503	20
D-00187	TTD:D0M4BM		P35228	NOS2	1.03099	Known
D-00187	TTD:D0M4BM		P29475	NOS1	1.02744	Known
D-00187	TTD:D0M4BM		P29474	NOS3	0.635081	Known
D-00203	DrugBank:DB02085	1-Aminocyclopropanecarboxylic Acid (DrugBank:DB02085)	P34969	HTR7	2.79057	1
D-00203	DrugBank:DB02085	1-Aminocyclopropanecarboxylic Acid (DrugBank:DB02085)	Q9UGL1	KDM5B	2.26222	2
D-00203	DrugBank:DB02085	1-Aminocyclopropanecarboxylic Acid (DrugBank:DB02085)	P32246	CCR1	2.04302	3
D-00203	DrugBank:DB02085	1-Aminocyclopropanecarboxylic Acid (DrugBank:DB02085)	P83916	CBX1	2.00833	4
D-00203	DrugBank:DB02085	1-Aminocyclopropanecarboxylic Acid (DrugBank:DB02085)	Q15109	AGER	1.83378	5
D-00203	DrugBank:DB02085	1-Aminocyclopropanecarboxylic Acid (DrugBank:DB02085)	P14416	DRD2	1.72987	6
D-00203	DrugBank:DB02085	1-Aminocyclopropanecarboxylic Acid (DrugBank:DB02085)	P42263	GRIA3	1.68105	7
D-00203	DrugBank:DB02085	1-Aminocyclopropanecarboxylic Acid (DrugBank:DB02085)	O00222	GRM8	1.64167	8
D-00203	DrugBank:DB02085	1-Aminocyclopropanecarboxylic Acid (DrugBank:DB02085)	Q14832	GRM3	1.59005	9
D-00203	DrugBank:DB02085	1-Aminocyclopropanecarboxylic Acid (DrugBank:DB02085)	Q9H3R0	KDM4C	1.54675	10
D-00203	DrugBank:DB02085	1-Aminocyclopropanecarboxylic Acid (DrugBank:DB02085)	O15054	KDM6B	1.51665	11
D-00203	DrugBank:DB02085	1-Aminocyclopropanecarboxylic Acid (DrugBank:DB02085)	Q7LBC6	KDM3B	1.47562	12
D-00203	DrugBank:DB02085	1-Aminocyclopropanecarboxylic Acid (DrugBank:DB02085)	P53396	ACLY	1.44012	13
D-00203	DrugBank:DB02085	1-Aminocyclopropanecarboxylic Acid (DrugBank:DB02085)	P78540	ARG2	1.39355	14
D-00203	DrugBank:DB02085	1-Aminocyclopropanecarboxylic Acid (DrugBank:DB02085)	Q9H9B1	EHMT1	1.38355	15
D-00203	DrugBank:DB02085	1-Aminocyclopropanecarboxylic Acid (DrugBank:DB02085)	Q9Y4C1	KDM3A	1.33392	16
D-00203	DrugBank:DB02085	1-Aminocyclopropanecarboxylic Acid (DrugBank:DB02085)	Q9BY66	KDM5D	1.28245	17
D-00203	DrugBank:DB02085	1-Aminocyclopropanecarboxylic Acid (DrugBank:DB02085)	Q99714	HSD17B10	1.24998	18
D-00203	DrugBank:DB02085	1-Aminocyclopropanecarboxylic Acid (DrugBank:DB02085)	Q14416	GRM2	1.2062	19
D-00203	DrugBank:DB02085	1-Aminocyclopropanecarboxylic Acid (DrugBank:DB02085)	Q16099	GRIK4	1.10687	20
D-00203	DrugBank:DB02085	1-Aminocyclopropanecarboxylic Acid (DrugBank:DB02085)	O75164	KDM4A	0.437499	Known
D-00203	DrugBank:DB02085	1-Aminocyclopropanecarboxylic Acid (DrugBank:DB02085)	Q96KQ7	EHMT2	0.418745	Known
D-00213	DrugBank:DB02201|DrugBank:DB05732|TTD:D0IL3O	Malonate Ion (DrugBank:DB02201)|Strontium malonate (DrugBank:DB05732)|Strontium malonate (TTD:D0IL3O)	O75493	CA11	3.24413	1
D-00213	DrugBank:DB02201|DrugBank:DB05732|TTD:D0IL3O	Malonate Ion (DrugBank:DB02201)|Strontium malonate (DrugBank:DB05732)|Strontium malonate (TTD:D0IL3O)	P43166	CA7	2.71736	2
D-00213	DrugBank:DB02201|DrugBank:DB05732|TTD:D0IL3O	Malonate Ion (DrugBank:DB02201)|Strontium malonate (DrugBank:DB05732)|Strontium malonate (TTD:D0IL3O)	Q9NY33	DPP3	2.05235	3
D-00213	DrugBank:DB02201|DrugBank:DB05732|TTD:D0IL3O	Malonate Ion (DrugBank:DB02201)|Strontium malonate (DrugBank:DB05732)|Strontium malonate (TTD:D0IL3O)	P04035	HMGCR	1.88596	4
D-00213	DrugBank:DB02201|DrugBank:DB05732|TTD:D0IL3O	Malonate Ion (DrugBank:DB02201)|Strontium malonate (DrugBank:DB05732)|Strontium malonate (TTD:D0IL3O)	O43570	CA12	1.73851	5
D-00213	DrugBank:DB02201|DrugBank:DB05732|TTD:D0IL3O	Malonate Ion (DrugBank:DB02201)|Strontium malonate (DrugBank:DB05732)|Strontium malonate (TTD:D0IL3O)	Q9ULX7	CA14	1.7193	6
D-00213	DrugBank:DB02201|DrugBank:DB05732|TTD:D0IL3O	Malonate Ion (DrugBank:DB02201)|Strontium malonate (DrugBank:DB05732)|Strontium malonate (TTD:D0IL3O)	P37268	FDFT1	1.70417	7
D-00213	DrugBank:DB02201|DrugBank:DB05732|TTD:D0IL3O	Malonate Ion (DrugBank:DB02201)|Strontium malonate (DrugBank:DB05732)|Strontium malonate (TTD:D0IL3O)	P00918	CA2	1.57781	8
D-00213	DrugBank:DB02201|DrugBank:DB05732|TTD:D0IL3O	Malonate Ion (DrugBank:DB02201)|Strontium malonate (DrugBank:DB05732)|Strontium malonate (TTD:D0IL3O)	Q8N1Q1	CA13	1.52726	9
D-00213	DrugBank:DB02201|DrugBank:DB05732|TTD:D0IL3O	Malonate Ion (DrugBank:DB02201)|Strontium malonate (DrugBank:DB05732)|Strontium malonate (TTD:D0IL3O)	Q16678	CYP1B1	1.43134	10
D-00213	DrugBank:DB02201|DrugBank:DB05732|TTD:D0IL3O	Malonate Ion (DrugBank:DB02201)|Strontium malonate (DrugBank:DB05732)|Strontium malonate (TTD:D0IL3O)	P00915	CA1	1.41644	11
D-00213	DrugBank:DB02201|DrugBank:DB05732|TTD:D0IL3O	Malonate Ion (DrugBank:DB02201)|Strontium malonate (DrugBank:DB05732)|Strontium malonate (TTD:D0IL3O)	P22748	CA4	1.40551	Known
D-00213	DrugBank:DB02201|DrugBank:DB05732|TTD:D0IL3O	Malonate Ion (DrugBank:DB02201)|Strontium malonate (DrugBank:DB05732)|Strontium malonate (TTD:D0IL3O)	Q16665	HIF1A	1.39065	12
D-00213	DrugBank:DB02201|DrugBank:DB05732|TTD:D0IL3O	Malonate Ion (DrugBank:DB02201)|Strontium malonate (DrugBank:DB05732)|Strontium malonate (TTD:D0IL3O)	P53779	MAPK10	1.33674	13
D-00213	DrugBank:DB02201|DrugBank:DB05732|TTD:D0IL3O	Malonate Ion (DrugBank:DB02201)|Strontium malonate (DrugBank:DB05732)|Strontium malonate (TTD:D0IL3O)	P39748	FEN1	1.16866	14
D-00213	DrugBank:DB02201|DrugBank:DB05732|TTD:D0IL3O	Malonate Ion (DrugBank:DB02201)|Strontium malonate (DrugBank:DB05732)|Strontium malonate (TTD:D0IL3O)	P23786	CPT2	1.10241	15
D-00213	DrugBank:DB02201|DrugBank:DB05732|TTD:D0IL3O	Malonate Ion (DrugBank:DB02201)|Strontium malonate (DrugBank:DB05732)|Strontium malonate (TTD:D0IL3O)	P16152	CBR1	1.09995	16
D-00213	DrugBank:DB02201|DrugBank:DB05732|TTD:D0IL3O	Malonate Ion (DrugBank:DB02201)|Strontium malonate (DrugBank:DB05732)|Strontium malonate (TTD:D0IL3O)	P21397	MAOA	1.09071	17
D-00213	DrugBank:DB02201|DrugBank:DB05732|TTD:D0IL3O	Malonate Ion (DrugBank:DB02201)|Strontium malonate (DrugBank:DB05732)|Strontium malonate (TTD:D0IL3O)	Q13002	GRIK2	1.04028	18
D-00213	DrugBank:DB02201|DrugBank:DB05732|TTD:D0IL3O	Malonate Ion (DrugBank:DB02201)|Strontium malonate (DrugBank:DB05732)|Strontium malonate (TTD:D0IL3O)	Q9HC97	GPR35	1.01374	19
D-00213	DrugBank:DB02201|DrugBank:DB05732|TTD:D0IL3O	Malonate Ion (DrugBank:DB02201)|Strontium malonate (DrugBank:DB05732)|Strontium malonate (TTD:D0IL3O)	Q16539	MAPK14	1.00667	20
D-00218	DrugBank:DB00260|IUPHAR:9489|KEGG:D00877|TTD:D02WFK|TTD:D04TMQ|TTD:D0G6RT	Cycloserine (DrugBank:DB00260)|D-cycloserine (IUPHAR:9489)|Cycloserine (JP17/USP/INN) (KEGG:D00877)|Cycloserine (TTD:D02WFK)|D-cycloserine (TTD:D04TMQ)	P10827	THRA	3.62684	1
D-00218	DrugBank:DB00260|IUPHAR:9489|KEGG:D00877|TTD:D02WFK|TTD:D04TMQ|TTD:D0G6RT	Cycloserine (DrugBank:DB00260)|D-cycloserine (IUPHAR:9489)|Cycloserine (JP17/USP/INN) (KEGG:D00877)|Cycloserine (TTD:D02WFK)|D-cycloserine (TTD:D04TMQ)	Q9Y271	CYSLTR1	2.86187	2
D-00218	DrugBank:DB00260|IUPHAR:9489|KEGG:D00877|TTD:D02WFK|TTD:D04TMQ|TTD:D0G6RT	Cycloserine (DrugBank:DB00260)|D-cycloserine (IUPHAR:9489)|Cycloserine (JP17/USP/INN) (KEGG:D00877)|Cycloserine (TTD:D02WFK)|D-cycloserine (TTD:D04TMQ)	P10828	THRB	2.75184	3
D-00218	DrugBank:DB00260|IUPHAR:9489|KEGG:D00877|TTD:D02WFK|TTD:D04TMQ|TTD:D0G6RT	Cycloserine (DrugBank:DB00260)|D-cycloserine (IUPHAR:9489)|Cycloserine (JP17/USP/INN) (KEGG:D00877)|Cycloserine (TTD:D02WFK)|D-cycloserine (TTD:D04TMQ)	P50135	HNMT	2.72125	4
D-00218	DrugBank:DB00260|IUPHAR:9489|KEGG:D00877|TTD:D02WFK|TTD:D04TMQ|TTD:D0G6RT	Cycloserine (DrugBank:DB00260)|D-cycloserine (IUPHAR:9489)|Cycloserine (JP17/USP/INN) (KEGG:D00877)|Cycloserine (TTD:D02WFK)|D-cycloserine (TTD:D04TMQ)	O43570	CA12	2.1768	5
D-00218	DrugBank:DB00260|IUPHAR:9489|KEGG:D00877|TTD:D02WFK|TTD:D04TMQ|TTD:D0G6RT	Cycloserine (DrugBank:DB00260)|D-cycloserine (IUPHAR:9489)|Cycloserine (JP17/USP/INN) (KEGG:D00877)|Cycloserine (TTD:D02WFK)|D-cycloserine (TTD:D04TMQ)	Q16539	MAPK14	2.11338	6
D-00218	DrugBank:DB00260|IUPHAR:9489|KEGG:D00877|TTD:D02WFK|TTD:D04TMQ|TTD:D0G6RT	Cycloserine (DrugBank:DB00260)|D-cycloserine (IUPHAR:9489)|Cycloserine (JP17/USP/INN) (KEGG:D00877)|Cycloserine (TTD:D02WFK)|D-cycloserine (TTD:D04TMQ)	P07202	TPO	2.08503	7
D-00218	DrugBank:DB00260|IUPHAR:9489|KEGG:D00877|TTD:D02WFK|TTD:D04TMQ|TTD:D0G6RT	Cycloserine (DrugBank:DB00260)|D-cycloserine (IUPHAR:9489)|Cycloserine (JP17/USP/INN) (KEGG:D00877)|Cycloserine (TTD:D02WFK)|D-cycloserine (TTD:D04TMQ)	P00918	CA2	1.8881	8
D-00218	DrugBank:DB00260|IUPHAR:9489|KEGG:D00877|TTD:D02WFK|TTD:D04TMQ|TTD:D0G6RT	Cycloserine (DrugBank:DB00260)|D-cycloserine (IUPHAR:9489)|Cycloserine (JP17/USP/INN) (KEGG:D00877)|Cycloserine (TTD:D02WFK)|D-cycloserine (TTD:D04TMQ)	P07550	ADRB2	1.79469	9
D-00218	DrugBank:DB00260|IUPHAR:9489|KEGG:D00877|TTD:D02WFK|TTD:D04TMQ|TTD:D0G6RT	Cycloserine (DrugBank:DB00260)|D-cycloserine (IUPHAR:9489)|Cycloserine (JP17/USP/INN) (KEGG:D00877)|Cycloserine (TTD:D02WFK)|D-cycloserine (TTD:D04TMQ)	P83916	CBX1	1.76584	10
D-00218	DrugBank:DB00260|IUPHAR:9489|KEGG:D00877|TTD:D02WFK|TTD:D04TMQ|TTD:D0G6RT	Cycloserine (DrugBank:DB00260)|D-cycloserine (IUPHAR:9489)|Cycloserine (JP17/USP/INN) (KEGG:D00877)|Cycloserine (TTD:D02WFK)|D-cycloserine (TTD:D04TMQ)	P22748	CA4	1.66465	11
D-00218	DrugBank:DB00260|IUPHAR:9489|KEGG:D00877|TTD:D02WFK|TTD:D04TMQ|TTD:D0G6RT	Cycloserine (DrugBank:DB00260)|D-cycloserine (IUPHAR:9489)|Cycloserine (JP17/USP/INN) (KEGG:D00877)|Cycloserine (TTD:D02WFK)|D-cycloserine (TTD:D04TMQ)	P0DMS8	ADORA3	1.63882	12
D-00218	DrugBank:DB00260|IUPHAR:9489|KEGG:D00877|TTD:D02WFK|TTD:D04TMQ|TTD:D0G6RT	Cycloserine (DrugBank:DB00260)|D-cycloserine (IUPHAR:9489)|Cycloserine (JP17/USP/INN) (KEGG:D00877)|Cycloserine (TTD:D02WFK)|D-cycloserine (TTD:D04TMQ)	Q99714	HSD17B10	1.63748	13
D-00218	DrugBank:DB00260|IUPHAR:9489|KEGG:D00877|TTD:D02WFK|TTD:D04TMQ|TTD:D0G6RT	Cycloserine (DrugBank:DB00260)|D-cycloserine (IUPHAR:9489)|Cycloserine (JP17/USP/INN) (KEGG:D00877)|Cycloserine (TTD:D02WFK)|D-cycloserine (TTD:D04TMQ)	Q02750	MAP2K1	1.53061	14
D-00218	DrugBank:DB00260|IUPHAR:9489|KEGG:D00877|TTD:D02WFK|TTD:D04TMQ|TTD:D0G6RT	Cycloserine (DrugBank:DB00260)|D-cycloserine (IUPHAR:9489)|Cycloserine (JP17/USP/INN) (KEGG:D00877)|Cycloserine (TTD:D02WFK)|D-cycloserine (TTD:D04TMQ)	Q9NY33	DPP3	1.45682	15
D-00218	DrugBank:DB00260|IUPHAR:9489|KEGG:D00877|TTD:D02WFK|TTD:D04TMQ|TTD:D0G6RT	Cycloserine (DrugBank:DB00260)|D-cycloserine (IUPHAR:9489)|Cycloserine (JP17/USP/INN) (KEGG:D00877)|Cycloserine (TTD:D02WFK)|D-cycloserine (TTD:D04TMQ)	P09651	HNRNPA1	1.45068	16
D-00218	DrugBank:DB00260|IUPHAR:9489|KEGG:D00877|TTD:D02WFK|TTD:D04TMQ|TTD:D0G6RT	Cycloserine (DrugBank:DB00260)|D-cycloserine (IUPHAR:9489)|Cycloserine (JP17/USP/INN) (KEGG:D00877)|Cycloserine (TTD:D02WFK)|D-cycloserine (TTD:D04TMQ)	P33261	CYP2C19	1.45001	17
D-00218	DrugBank:DB00260|IUPHAR:9489|KEGG:D00877|TTD:D02WFK|TTD:D04TMQ|TTD:D0G6RT	Cycloserine (DrugBank:DB00260)|D-cycloserine (IUPHAR:9489)|Cycloserine (JP17/USP/INN) (KEGG:D00877)|Cycloserine (TTD:D02WFK)|D-cycloserine (TTD:D04TMQ)	Q9UBN4	TRPC4	1.4478	18
D-00218	DrugBank:DB00260|IUPHAR:9489|KEGG:D00877|TTD:D02WFK|TTD:D04TMQ|TTD:D0G6RT	Cycloserine (DrugBank:DB00260)|D-cycloserine (IUPHAR:9489)|Cycloserine (JP17/USP/INN) (KEGG:D00877)|Cycloserine (TTD:D02WFK)|D-cycloserine (TTD:D04TMQ)	P18089	ADRA2B	1.38526	19
D-00218	DrugBank:DB00260|IUPHAR:9489|KEGG:D00877|TTD:D02WFK|TTD:D04TMQ|TTD:D0G6RT	Cycloserine (DrugBank:DB00260)|D-cycloserine (IUPHAR:9489)|Cycloserine (JP17/USP/INN) (KEGG:D00877)|Cycloserine (TTD:D02WFK)|D-cycloserine (TTD:D04TMQ)	Q16678	CYP1B1	1.3447	20
D-00218	DrugBank:DB00260|IUPHAR:9489|KEGG:D00877|TTD:D02WFK|TTD:D04TMQ|TTD:D0G6RT	Cycloserine (DrugBank:DB00260)|D-cycloserine (IUPHAR:9489)|Cycloserine (JP17/USP/INN) (KEGG:D00877)|Cycloserine (TTD:D02WFK)|D-cycloserine (TTD:D04TMQ)	Q16665	HIF1A	0.949994	Known
D-00227	DrugBank:DB04401	[Formylmethyl]Trimethyl-Ammonium, N,N,N-Trimethylammonium Acetaldehyde (DrugBank:DB04401)	P05981	HPN	2.82866	1
D-00227	DrugBank:DB04401	[Formylmethyl]Trimethyl-Ammonium, N,N,N-Trimethylammonium Acetaldehyde (DrugBank:DB04401)	P30536	TSPO	2.61855	2
D-00227	DrugBank:DB04401	[Formylmethyl]Trimethyl-Ammonium, N,N,N-Trimethylammonium Acetaldehyde (DrugBank:DB04401)	P16066	NPR1	2.4437	3
D-00227	DrugBank:DB04401	[Formylmethyl]Trimethyl-Ammonium, N,N,N-Trimethylammonium Acetaldehyde (DrugBank:DB04401)	P08172	CHRM2	1.98363	4
D-00227	DrugBank:DB04401	[Formylmethyl]Trimethyl-Ammonium, N,N,N-Trimethylammonium Acetaldehyde (DrugBank:DB04401)	P43681	CHRNA4	1.74597	5
D-00227	DrugBank:DB04401	[Formylmethyl]Trimethyl-Ammonium, N,N,N-Trimethylammonium Acetaldehyde (DrugBank:DB04401)	P36544	CHRNA7	1.62325	6
D-00227	DrugBank:DB04401	[Formylmethyl]Trimethyl-Ammonium, N,N,N-Trimethylammonium Acetaldehyde (DrugBank:DB04401)	Q16445	GABRA6	1.55066	7
D-00227	DrugBank:DB04401	[Formylmethyl]Trimethyl-Ammonium, N,N,N-Trimethylammonium Acetaldehyde (DrugBank:DB04401)	P83916	CBX1	1.53838	8
D-00227	DrugBank:DB04401	[Formylmethyl]Trimethyl-Ammonium, N,N,N-Trimethylammonium Acetaldehyde (DrugBank:DB04401)	Q99720	SIGMAR1	1.49397	9
D-00227	DrugBank:DB04401	[Formylmethyl]Trimethyl-Ammonium, N,N,N-Trimethylammonium Acetaldehyde (DrugBank:DB04401)	P42785	PRCP	1.47303	10
D-00227	DrugBank:DB04401	[Formylmethyl]Trimethyl-Ammonium, N,N,N-Trimethylammonium Acetaldehyde (DrugBank:DB04401)	P12104	FABP2	1.43658	11
D-00227	DrugBank:DB04401	[Formylmethyl]Trimethyl-Ammonium, N,N,N-Trimethylammonium Acetaldehyde (DrugBank:DB04401)	P21728	DRD1	1.43328	12
D-00227	DrugBank:DB04401	[Formylmethyl]Trimethyl-Ammonium, N,N,N-Trimethylammonium Acetaldehyde (DrugBank:DB04401)	P12821	ACE	1.25486	13
D-00227	DrugBank:DB04401	[Formylmethyl]Trimethyl-Ammonium, N,N,N-Trimethylammonium Acetaldehyde (DrugBank:DB04401)	P11229	CHRM1	1.25068	14
D-00227	DrugBank:DB04401	[Formylmethyl]Trimethyl-Ammonium, N,N,N-Trimethylammonium Acetaldehyde (DrugBank:DB04401)	Q16665	HIF1A	1.24874	15
D-00227	DrugBank:DB04401	[Formylmethyl]Trimethyl-Ammonium, N,N,N-Trimethylammonium Acetaldehyde (DrugBank:DB04401)	P31644	GABRA5	1.18844	16
D-00227	DrugBank:DB04401	[Formylmethyl]Trimethyl-Ammonium, N,N,N-Trimethylammonium Acetaldehyde (DrugBank:DB04401)	P25098	GRK2	1.16527	17
D-00227	DrugBank:DB04401	[Formylmethyl]Trimethyl-Ammonium, N,N,N-Trimethylammonium Acetaldehyde (DrugBank:DB04401)	P16473	TSHR	1.14992	Known
D-00227	DrugBank:DB04401	[Formylmethyl]Trimethyl-Ammonium, N,N,N-Trimethylammonium Acetaldehyde (DrugBank:DB04401)	P35354	PTGS2	1.12442	18
D-00227	DrugBank:DB04401	[Formylmethyl]Trimethyl-Ammonium, N,N,N-Trimethylammonium Acetaldehyde (DrugBank:DB04401)	P47869	GABRA2	1.08491	19
D-00227	DrugBank:DB04401	[Formylmethyl]Trimethyl-Ammonium, N,N,N-Trimethylammonium Acetaldehyde (DrugBank:DB04401)	Q99714	HSD17B10	1.07502	20
D-00228	DrugBank:DB02335|TTD:D01ILO|TTD:D02XHB	2-Aminothiazoline (DrugBank:DB02335)	P14384	CPM	2.88606	1
D-00228	DrugBank:DB02335|TTD:D01ILO|TTD:D02XHB	2-Aminothiazoline (DrugBank:DB02335)	Q9Y5N1	HRH3	2.67462	2
D-00228	DrugBank:DB02335|TTD:D01ILO|TTD:D02XHB	2-Aminothiazoline (DrugBank:DB02335)	Q9Y5Z0	BACE2	2.61379	3
D-00228	DrugBank:DB02335|TTD:D01ILO|TTD:D02XHB	2-Aminothiazoline (DrugBank:DB02335)	Q9H3N8	HRH4	2.50152	4
D-00228	DrugBank:DB02335|TTD:D01ILO|TTD:D02XHB	2-Aminothiazoline (DrugBank:DB02335)	P18825	ADRA2C	2.28534	5
D-00228	DrugBank:DB02335|TTD:D01ILO|TTD:D02XHB	2-Aminothiazoline (DrugBank:DB02335)	O94760	DDAH1	2.27849	6
D-00228	DrugBank:DB02335|TTD:D01ILO|TTD:D02XHB	2-Aminothiazoline (DrugBank:DB02335)	Q9Y2I1	NISCH	2.13257	7
D-00228	DrugBank:DB02335|TTD:D01ILO|TTD:D02XHB	2-Aminothiazoline (DrugBank:DB02335)	P00918	CA2	2.12235	8
D-00228	DrugBank:DB02335|TTD:D01ILO|TTD:D02XHB	2-Aminothiazoline (DrugBank:DB02335)	P56817	BACE1	1.96824	9
D-00228	DrugBank:DB02335|TTD:D01ILO|TTD:D02XHB	2-Aminothiazoline (DrugBank:DB02335)	P48449	LSS	1.79865	10
D-00228	DrugBank:DB02335|TTD:D01ILO|TTD:D02XHB	2-Aminothiazoline (DrugBank:DB02335)	P18089	ADRA2B	1.79349	11
D-00228	DrugBank:DB02335|TTD:D01ILO|TTD:D02XHB	2-Aminothiazoline (DrugBank:DB02335)	P15086	CPB1	1.76131	12
D-00228	DrugBank:DB02335|TTD:D01ILO|TTD:D02XHB	2-Aminothiazoline (DrugBank:DB02335)	P11137	MAP2	1.66026	13
D-00228	DrugBank:DB02335|TTD:D01ILO|TTD:D02XHB	2-Aminothiazoline (DrugBank:DB02335)	P34913	EPHX2	1.5987	14
D-00228	DrugBank:DB02335|TTD:D01ILO|TTD:D02XHB	2-Aminothiazoline (DrugBank:DB02335)	O15554	KCNN4	1.52619	15
D-00228	DrugBank:DB02335|TTD:D01ILO|TTD:D02XHB	2-Aminothiazoline (DrugBank:DB02335)	P25774	CTSS	1.45998	16
D-00228	DrugBank:DB02335|TTD:D01ILO|TTD:D02XHB	2-Aminothiazoline (DrugBank:DB02335)	P15169	CPN1	1.4279	17
D-00228	DrugBank:DB02335|TTD:D01ILO|TTD:D02XHB	2-Aminothiazoline (DrugBank:DB02335)	Q96RJ0	TAAR1	1.41587	18
D-00228	DrugBank:DB02335|TTD:D01ILO|TTD:D02XHB	2-Aminothiazoline (DrugBank:DB02335)	P28845	HSD11B1	1.41448	19
D-00228	DrugBank:DB02335|TTD:D01ILO|TTD:D02XHB	2-Aminothiazoline (DrugBank:DB02335)	Q96IY4	CPB2	1.32975	20
D-00228	DrugBank:DB02335|TTD:D01ILO|TTD:D02XHB	2-Aminothiazoline (DrugBank:DB02335)	P35228	NOS2	0.653022	Known
D-00228	DrugBank:DB02335|TTD:D01ILO|TTD:D02XHB	2-Aminothiazoline (DrugBank:DB02335)	P29475	NOS1	0.64522	Known
D-00228	DrugBank:DB02335|TTD:D01ILO|TTD:D02XHB	2-Aminothiazoline (DrugBank:DB02335)	P29474	NOS3	0.373641	Known
D-00229	DrugBank:DB03854|TTD:D02QGI	Pentane-1,5-Diamine (DrugBank:DB03854)	O75493	CA11	3.24413	1
D-00229	DrugBank:DB03854|TTD:D02QGI	Pentane-1,5-Diamine (DrugBank:DB03854)	O75608	LYPLA1	2.62465	2
D-00229	DrugBank:DB03854|TTD:D02QGI	Pentane-1,5-Diamine (DrugBank:DB03854)	P00918	CA2	2.49204	3
D-00229	DrugBank:DB03854|TTD:D02QGI	Pentane-1,5-Diamine (DrugBank:DB03854)	Q9H4A4	RNPEP	2.32915	4
D-00229	DrugBank:DB03854|TTD:D02QGI	Pentane-1,5-Diamine (DrugBank:DB03854)	O43570	CA12	2.24179	Known
D-00229	DrugBank:DB03854|TTD:D02QGI	Pentane-1,5-Diamine (DrugBank:DB03854)	P61073	CXCR4	2.19336	5
D-00229	DrugBank:DB03854|TTD:D02QGI	Pentane-1,5-Diamine (DrugBank:DB03854)	P22748	CA4	2.14539	Known
D-00229	DrugBank:DB03854|TTD:D02QGI	Pentane-1,5-Diamine (DrugBank:DB03854)	O95372	LYPLA2	2.13198	6
D-00229	DrugBank:DB03854|TTD:D02QGI	Pentane-1,5-Diamine (DrugBank:DB03854)	Q9Y5N1	HRH3	2.10367	7
D-00229	DrugBank:DB03854|TTD:D02QGI	Pentane-1,5-Diamine (DrugBank:DB03854)	P34913	EPHX2	2.09888	8
D-00229	DrugBank:DB03854|TTD:D02QGI	Pentane-1,5-Diamine (DrugBank:DB03854)	Q92731	ESR2	2.0861	9
D-00229	DrugBank:DB03854|TTD:D02QGI	Pentane-1,5-Diamine (DrugBank:DB03854)	P14324	FDPS	2.0586	10
D-00229	DrugBank:DB03854|TTD:D02QGI	Pentane-1,5-Diamine (DrugBank:DB03854)	P35354	PTGS2	2.00816	11
D-00229	DrugBank:DB03854|TTD:D02QGI	Pentane-1,5-Diamine (DrugBank:DB03854)	P09960	LTA4H	1.91436	12
D-00229	DrugBank:DB03854|TTD:D02QGI	Pentane-1,5-Diamine (DrugBank:DB03854)	P15121	AKR1B1	1.67005	13
D-00229	DrugBank:DB03854|TTD:D02QGI	Pentane-1,5-Diamine (DrugBank:DB03854)	Q16678	CYP1B1	1.65212	14
D-00229	DrugBank:DB03854|TTD:D02QGI	Pentane-1,5-Diamine (DrugBank:DB03854)	Q16790	CA9	1.63754	Known
D-00229	DrugBank:DB03854|TTD:D02QGI	Pentane-1,5-Diamine (DrugBank:DB03854)	Q8N1Q1	CA13	1.51991	15
D-00229	DrugBank:DB03854|TTD:D02QGI	Pentane-1,5-Diamine (DrugBank:DB03854)	P00915	CA1	1.49537	16
D-00229	DrugBank:DB03854|TTD:D02QGI	Pentane-1,5-Diamine (DrugBank:DB03854)	Q9NY33	DPP3	1.44851	17
D-00229	DrugBank:DB03854|TTD:D02QGI	Pentane-1,5-Diamine (DrugBank:DB03854)	Q99436	PSMB7	1.42174	18
D-00229	DrugBank:DB03854|TTD:D02QGI	Pentane-1,5-Diamine (DrugBank:DB03854)	P12821	ACE	1.40009	19
D-00229	DrugBank:DB03854|TTD:D02QGI	Pentane-1,5-Diamine (DrugBank:DB03854)	P51449	RORC	1.39253	20
D-00229	DrugBank:DB03854|TTD:D02QGI	Pentane-1,5-Diamine (DrugBank:DB03854)	P35218	CA5A	1.39015	Known
D-00229	DrugBank:DB03854|TTD:D02QGI	Pentane-1,5-Diamine (DrugBank:DB03854)	P43166	CA7	1.19803	Known
D-00229	DrugBank:DB03854|TTD:D02QGI	Pentane-1,5-Diamine (DrugBank:DB03854)	Q9ULX7	CA14	1.14009	Known
D-00229	DrugBank:DB03854|TTD:D02QGI	Pentane-1,5-Diamine (DrugBank:DB03854)	Q9Y2D0	CA5B	1.10668	Known
D-00229	DrugBank:DB03854|TTD:D02QGI	Pentane-1,5-Diamine (DrugBank:DB03854)	P07451	CA3	1.09731	Known
D-00229	DrugBank:DB03854|TTD:D02QGI	Pentane-1,5-Diamine (DrugBank:DB03854)	P23280	CA6	1.03215	Known
D-00239	DrugBank:DB02530|IUPHAR:1067|IUPHAR:5410|KEGG:D00058|TTD:D0C9XA|TTD:D0D3ID	gamma-Aminobutyric acid (DrugBank:DB02530)|GABA (IUPHAR:1067)|[<sup>3</sup>H]GABA (IUPHAR:5410)|gamma-Aminobutyric acid (JAN) (KEGG:D00058)	Q15722	LTB4R	3.01366	1
D-00239	DrugBank:DB02530|IUPHAR:1067|IUPHAR:5410|KEGG:D00058|TTD:D0C9XA|TTD:D0D3ID	gamma-Aminobutyric acid (DrugBank:DB02530)|GABA (IUPHAR:1067)|[<sup>3</sup>H]GABA (IUPHAR:5410)|gamma-Aminobutyric acid (JAN) (KEGG:D00058)	P30536	TSPO	2.85384	2
D-00239	DrugBank:DB02530|IUPHAR:1067|IUPHAR:5410|KEGG:D00058|TTD:D0C9XA|TTD:D0D3ID	gamma-Aminobutyric acid (DrugBank:DB02530)|GABA (IUPHAR:1067)|[<sup>3</sup>H]GABA (IUPHAR:5410)|gamma-Aminobutyric acid (JAN) (KEGG:D00058)	P31644	GABRA5	2.76853	Known
D-00239	DrugBank:DB02530|IUPHAR:1067|IUPHAR:5410|KEGG:D00058|TTD:D0C9XA|TTD:D0D3ID	gamma-Aminobutyric acid (DrugBank:DB02530)|GABA (IUPHAR:1067)|[<sup>3</sup>H]GABA (IUPHAR:5410)|gamma-Aminobutyric acid (JAN) (KEGG:D00058)	P28472	GABRB3	2.52934	3
D-00239	DrugBank:DB02530|IUPHAR:1067|IUPHAR:5410|KEGG:D00058|TTD:D0C9XA|TTD:D0D3ID	gamma-Aminobutyric acid (DrugBank:DB02530)|GABA (IUPHAR:1067)|[<sup>3</sup>H]GABA (IUPHAR:5410)|gamma-Aminobutyric acid (JAN) (KEGG:D00058)	Q16445	GABRA6	2.45453	Known
D-00239	DrugBank:DB02530|IUPHAR:1067|IUPHAR:5410|KEGG:D00058|TTD:D0C9XA|TTD:D0D3ID	gamma-Aminobutyric acid (DrugBank:DB02530)|GABA (IUPHAR:1067)|[<sup>3</sup>H]GABA (IUPHAR:5410)|gamma-Aminobutyric acid (JAN) (KEGG:D00058)	P48169	GABRA4	2.39535	4
D-00239	DrugBank:DB02530|IUPHAR:1067|IUPHAR:5410|KEGG:D00058|TTD:D0C9XA|TTD:D0D3ID	gamma-Aminobutyric acid (DrugBank:DB02530)|GABA (IUPHAR:1067)|[<sup>3</sup>H]GABA (IUPHAR:5410)|gamma-Aminobutyric acid (JAN) (KEGG:D00058)	Q9UBS5	GABBR1	2.37602	Known
D-00239	DrugBank:DB02530|IUPHAR:1067|IUPHAR:5410|KEGG:D00058|TTD:D0C9XA|TTD:D0D3ID	gamma-Aminobutyric acid (DrugBank:DB02530)|GABA (IUPHAR:1067)|[<sup>3</sup>H]GABA (IUPHAR:5410)|gamma-Aminobutyric acid (JAN) (KEGG:D00058)	Q9NPC1	LTB4R2	2.34653	5
D-00239	DrugBank:DB02530|IUPHAR:1067|IUPHAR:5410|KEGG:D00058|TTD:D0C9XA|TTD:D0D3ID	gamma-Aminobutyric acid (DrugBank:DB02530)|GABA (IUPHAR:1067)|[<sup>3</sup>H]GABA (IUPHAR:5410)|gamma-Aminobutyric acid (JAN) (KEGG:D00058)	P47869	GABRA2	2.28143	Known
D-00239	DrugBank:DB02530|IUPHAR:1067|IUPHAR:5410|KEGG:D00058|TTD:D0C9XA|TTD:D0D3ID	gamma-Aminobutyric acid (DrugBank:DB02530)|GABA (IUPHAR:1067)|[<sup>3</sup>H]GABA (IUPHAR:5410)|gamma-Aminobutyric acid (JAN) (KEGG:D00058)	P14867	GABRA1	2.18897	Known
D-00239	DrugBank:DB02530|IUPHAR:1067|IUPHAR:5410|KEGG:D00058|TTD:D0C9XA|TTD:D0D3ID	gamma-Aminobutyric acid (DrugBank:DB02530)|GABA (IUPHAR:1067)|[<sup>3</sup>H]GABA (IUPHAR:5410)|gamma-Aminobutyric acid (JAN) (KEGG:D00058)	P34903	GABRA3	2.15563	Known
D-00239	DrugBank:DB02530|IUPHAR:1067|IUPHAR:5410|KEGG:D00058|TTD:D0C9XA|TTD:D0D3ID	gamma-Aminobutyric acid (DrugBank:DB02530)|GABA (IUPHAR:1067)|[<sup>3</sup>H]GABA (IUPHAR:5410)|gamma-Aminobutyric acid (JAN) (KEGG:D00058)	P23975	SLC6A2	1.9324	6
D-00239	DrugBank:DB02530|IUPHAR:1067|IUPHAR:5410|KEGG:D00058|TTD:D0C9XA|TTD:D0D3ID	gamma-Aminobutyric acid (DrugBank:DB02530)|GABA (IUPHAR:1067)|[<sup>3</sup>H]GABA (IUPHAR:5410)|gamma-Aminobutyric acid (JAN) (KEGG:D00058)	P0DMS8	ADORA3	1.88149	7
D-00239	DrugBank:DB02530|IUPHAR:1067|IUPHAR:5410|KEGG:D00058|TTD:D0C9XA|TTD:D0D3ID	gamma-Aminobutyric acid (DrugBank:DB02530)|GABA (IUPHAR:1067)|[<sup>3</sup>H]GABA (IUPHAR:5410)|gamma-Aminobutyric acid (JAN) (KEGG:D00058)	P35408	PTGER4	1.80178	8
D-00239	DrugBank:DB02530|IUPHAR:1067|IUPHAR:5410|KEGG:D00058|TTD:D0C9XA|TTD:D0D3ID	gamma-Aminobutyric acid (DrugBank:DB02530)|GABA (IUPHAR:1067)|[<sup>3</sup>H]GABA (IUPHAR:5410)|gamma-Aminobutyric acid (JAN) (KEGG:D00058)	P25105	PTAFR	1.77036	9
D-00239	DrugBank:DB02530|IUPHAR:1067|IUPHAR:5410|KEGG:D00058|TTD:D0C9XA|TTD:D0D3ID	gamma-Aminobutyric acid (DrugBank:DB02530)|GABA (IUPHAR:1067)|[<sup>3</sup>H]GABA (IUPHAR:5410)|gamma-Aminobutyric acid (JAN) (KEGG:D00058)	P25090	FPR2	1.73666	10
D-00239	DrugBank:DB02530|IUPHAR:1067|IUPHAR:5410|KEGG:D00058|TTD:D0C9XA|TTD:D0D3ID	gamma-Aminobutyric acid (DrugBank:DB02530)|GABA (IUPHAR:1067)|[<sup>3</sup>H]GABA (IUPHAR:5410)|gamma-Aminobutyric acid (JAN) (KEGG:D00058)	P41143	OPRD1	1.71058	11
D-00239	DrugBank:DB02530|IUPHAR:1067|IUPHAR:5410|KEGG:D00058|TTD:D0C9XA|TTD:D0D3ID	gamma-Aminobutyric acid (DrugBank:DB02530)|GABA (IUPHAR:1067)|[<sup>3</sup>H]GABA (IUPHAR:5410)|gamma-Aminobutyric acid (JAN) (KEGG:D00058)	P12821	ACE	1.70716	12
D-00239	DrugBank:DB02530|IUPHAR:1067|IUPHAR:5410|KEGG:D00058|TTD:D0C9XA|TTD:D0D3ID	gamma-Aminobutyric acid (DrugBank:DB02530)|GABA (IUPHAR:1067)|[<sup>3</sup>H]GABA (IUPHAR:5410)|gamma-Aminobutyric acid (JAN) (KEGG:D00058)	Q04609	FOLH1	1.62327	13
D-00239	DrugBank:DB02530|IUPHAR:1067|IUPHAR:5410|KEGG:D00058|TTD:D0C9XA|TTD:D0D3ID	gamma-Aminobutyric acid (DrugBank:DB02530)|GABA (IUPHAR:1067)|[<sup>3</sup>H]GABA (IUPHAR:5410)|gamma-Aminobutyric acid (JAN) (KEGG:D00058)	Q9H4A4	RNPEP	1.61234	14
D-00239	DrugBank:DB02530|IUPHAR:1067|IUPHAR:5410|KEGG:D00058|TTD:D0C9XA|TTD:D0D3ID	gamma-Aminobutyric acid (DrugBank:DB02530)|GABA (IUPHAR:1067)|[<sup>3</sup>H]GABA (IUPHAR:5410)|gamma-Aminobutyric acid (JAN) (KEGG:D00058)	P52895	AKR1C2	1.55355	15
D-00239	DrugBank:DB02530|IUPHAR:1067|IUPHAR:5410|KEGG:D00058|TTD:D0C9XA|TTD:D0D3ID	gamma-Aminobutyric acid (DrugBank:DB02530)|GABA (IUPHAR:1067)|[<sup>3</sup>H]GABA (IUPHAR:5410)|gamma-Aminobutyric acid (JAN) (KEGG:D00058)	P43115	PTGER3	1.54802	16
D-00239	DrugBank:DB02530|IUPHAR:1067|IUPHAR:5410|KEGG:D00058|TTD:D0C9XA|TTD:D0D3ID	gamma-Aminobutyric acid (DrugBank:DB02530)|GABA (IUPHAR:1067)|[<sup>3</sup>H]GABA (IUPHAR:5410)|gamma-Aminobutyric acid (JAN) (KEGG:D00058)	P34913	EPHX2	1.53036	17
D-00239	DrugBank:DB02530|IUPHAR:1067|IUPHAR:5410|KEGG:D00058|TTD:D0C9XA|TTD:D0D3ID	gamma-Aminobutyric acid (DrugBank:DB02530)|GABA (IUPHAR:1067)|[<sup>3</sup>H]GABA (IUPHAR:5410)|gamma-Aminobutyric acid (JAN) (KEGG:D00058)	P21731	TBXA2R	1.51209	18
D-00239	DrugBank:DB02530|IUPHAR:1067|IUPHAR:5410|KEGG:D00058|TTD:D0C9XA|TTD:D0D3ID	gamma-Aminobutyric acid (DrugBank:DB02530)|GABA (IUPHAR:1067)|[<sup>3</sup>H]GABA (IUPHAR:5410)|gamma-Aminobutyric acid (JAN) (KEGG:D00058)	P09960	LTA4H	1.47888	19
D-00239	DrugBank:DB02530|IUPHAR:1067|IUPHAR:5410|KEGG:D00058|TTD:D0C9XA|TTD:D0D3ID	gamma-Aminobutyric acid (DrugBank:DB02530)|GABA (IUPHAR:1067)|[<sup>3</sup>H]GABA (IUPHAR:5410)|gamma-Aminobutyric acid (JAN) (KEGG:D00058)	O75388	GPR32	1.43258	20
D-00239	DrugBank:DB02530|IUPHAR:1067|IUPHAR:5410|KEGG:D00058|TTD:D0C9XA|TTD:D0D3ID	gamma-Aminobutyric acid (DrugBank:DB02530)|GABA (IUPHAR:1067)|[<sup>3</sup>H]GABA (IUPHAR:5410)|gamma-Aminobutyric acid (JAN) (KEGG:D00058)	A8MPY1	GABRR3	1.28691	Known
D-00239	DrugBank:DB02530|IUPHAR:1067|IUPHAR:5410|KEGG:D00058|TTD:D0C9XA|TTD:D0D3ID	gamma-Aminobutyric acid (DrugBank:DB02530)|GABA (IUPHAR:1067)|[<sup>3</sup>H]GABA (IUPHAR:5410)|gamma-Aminobutyric acid (JAN) (KEGG:D00058)	P30531	SLC6A1	1.1805	Known
D-00239	DrugBank:DB02530|IUPHAR:1067|IUPHAR:5410|KEGG:D00058|TTD:D0C9XA|TTD:D0D3ID	gamma-Aminobutyric acid (DrugBank:DB02530)|GABA (IUPHAR:1067)|[<sup>3</sup>H]GABA (IUPHAR:5410)|gamma-Aminobutyric acid (JAN) (KEGG:D00058)	P24046	GABRR1	0.632875	Known
D-00239	DrugBank:DB02530|IUPHAR:1067|IUPHAR:5410|KEGG:D00058|TTD:D0C9XA|TTD:D0D3ID	gamma-Aminobutyric acid (DrugBank:DB02530)|GABA (IUPHAR:1067)|[<sup>3</sup>H]GABA (IUPHAR:5410)|gamma-Aminobutyric acid (JAN) (KEGG:D00058)	Q96KQ7	EHMT2	0.418744	Known
D-00239	DrugBank:DB02530|IUPHAR:1067|IUPHAR:5410|KEGG:D00058|TTD:D0C9XA|TTD:D0D3ID	gamma-Aminobutyric acid (DrugBank:DB02530)|GABA (IUPHAR:1067)|[<sup>3</sup>H]GABA (IUPHAR:5410)|gamma-Aminobutyric acid (JAN) (KEGG:D00058)	P48066	SLC6A11	0.222496	Known
D-00244	TTD:D09WVV		P21730	C5AR1	2.38949	1
D-00244	TTD:D09WVV		Q9NY33	DPP3	1.64798	2
D-00244	TTD:D09WVV		P29466	CASP1	1.60414	3
D-00244	TTD:D09WVV		P83916	CBX1	1.51102	4
D-00244	TTD:D09WVV		P21964	COMT	1.45992	5
D-00244	TTD:D09WVV		P10828	THRB	1.36655	6
D-00244	TTD:D09WVV		Q99714	HSD17B10	1.2625	7
D-00244	TTD:D09WVV		P33527	ABCC1	1.24089	8
D-00244	TTD:D09WVV		P05121	SERPINE1	1.20089	9
D-00244	TTD:D09WVV		P11309	PIM1	1.19874	10
D-00244	TTD:D09WVV		P22748	CA4	1.10261	11
D-00244	TTD:D09WVV		P13945	ADRB3	1.04516	12
D-00244	TTD:D09WVV		Q9Y2T5	GPR52	1.04066	13
D-00244	TTD:D09WVV		Q14330	GPR18	1.02603	14
D-00244	TTD:D09WVV		P18089	ADRA2B	1.02523	15
D-00244	TTD:D09WVV		P34998	CRHR1	1.01908	16
D-00244	TTD:D09WVV		P31645	SLC6A4	1.0107	17
D-00244	TTD:D09WVV		P08913	ADRA2A	0.996211	18
D-00244	TTD:D09WVV		P21554	CNR1	0.953746	19
D-00244	TTD:D09WVV		O15296	ALOX15B	0.945463	20
D-00244	TTD:D09WVV		P27695	APEX1	0.627447	Known
D-00244	TTD:D09WVV		Q9UBT6	POLK	0.557876	Known
D-00244	TTD:D09WVV		P46063	RECQL	0.453125	Known
D-00252	DrugBank:DB00122|IUPHAR:4551|KEGG:D07690|TTD:D08DAE|TTD:D0Q2DE|TTD:D0T8MA	Choline (DrugBank:DB00122)|choline (IUPHAR:4551)|Choline (DCF) (KEGG:D07690)|ATN-224 (TTD:D0T8MA)	Q9Y5N1	HRH3	2.56863	1
D-00252	DrugBank:DB00122|IUPHAR:4551|KEGG:D07690|TTD:D08DAE|TTD:D0Q2DE|TTD:D0T8MA	Choline (DrugBank:DB00122)|choline (IUPHAR:4551)|Choline (DCF) (KEGG:D07690)|ATN-224 (TTD:D0T8MA)	P22303	ACHE	2.43679	2
D-00252	DrugBank:DB00122|IUPHAR:4551|KEGG:D07690|TTD:D08DAE|TTD:D0Q2DE|TTD:D0T8MA	Choline (DrugBank:DB00122)|choline (IUPHAR:4551)|Choline (DCF) (KEGG:D07690)|ATN-224 (TTD:D0T8MA)	Q9GZV3	SLC5A7	2.24504	3
D-00252	DrugBank:DB00122|IUPHAR:4551|KEGG:D07690|TTD:D08DAE|TTD:D0Q2DE|TTD:D0T8MA	Choline (DrugBank:DB00122)|choline (IUPHAR:4551)|Choline (DCF) (KEGG:D07690)|ATN-224 (TTD:D0T8MA)	P36544	CHRNA7	2.11295	4
D-00252	DrugBank:DB00122|IUPHAR:4551|KEGG:D07690|TTD:D08DAE|TTD:D0Q2DE|TTD:D0T8MA	Choline (DrugBank:DB00122)|choline (IUPHAR:4551)|Choline (DCF) (KEGG:D07690)|ATN-224 (TTD:D0T8MA)	P08172	CHRM2	2.10991	5
D-00252	DrugBank:DB00122|IUPHAR:4551|KEGG:D07690|TTD:D08DAE|TTD:D0Q2DE|TTD:D0T8MA	Choline (DrugBank:DB00122)|choline (IUPHAR:4551)|Choline (DCF) (KEGG:D07690)|ATN-224 (TTD:D0T8MA)	Q15822	CHRNA2	1.85772	6
D-00252	DrugBank:DB00122|IUPHAR:4551|KEGG:D07690|TTD:D08DAE|TTD:D0Q2DE|TTD:D0T8MA	Choline (DrugBank:DB00122)|choline (IUPHAR:4551)|Choline (DCF) (KEGG:D07690)|ATN-224 (TTD:D0T8MA)	P41595	HTR2B	1.65287	7
D-00252	DrugBank:DB00122|IUPHAR:4551|KEGG:D07690|TTD:D08DAE|TTD:D0Q2DE|TTD:D0T8MA	Choline (DrugBank:DB00122)|choline (IUPHAR:4551)|Choline (DCF) (KEGG:D07690)|ATN-224 (TTD:D0T8MA)	P43681	CHRNA4	1.65029	Known
D-00252	DrugBank:DB00122|IUPHAR:4551|KEGG:D07690|TTD:D08DAE|TTD:D0Q2DE|TTD:D0T8MA	Choline (DrugBank:DB00122)|choline (IUPHAR:4551)|Choline (DCF) (KEGG:D07690)|ATN-224 (TTD:D0T8MA)	P28335	HTR2C	1.5696	8
D-00252	DrugBank:DB00122|IUPHAR:4551|KEGG:D07690|TTD:D08DAE|TTD:D0Q2DE|TTD:D0T8MA	Choline (DrugBank:DB00122)|choline (IUPHAR:4551)|Choline (DCF) (KEGG:D07690)|ATN-224 (TTD:D0T8MA)	P11229	CHRM1	1.4208	9
D-00252	DrugBank:DB00122|IUPHAR:4551|KEGG:D07690|TTD:D08DAE|TTD:D0Q2DE|TTD:D0T8MA	Choline (DrugBank:DB00122)|choline (IUPHAR:4551)|Choline (DCF) (KEGG:D07690)|ATN-224 (TTD:D0T8MA)	P32297	CHRNA3	1.39964	10
D-00252	DrugBank:DB00122|IUPHAR:4551|KEGG:D07690|TTD:D08DAE|TTD:D0Q2DE|TTD:D0T8MA	Choline (DrugBank:DB00122)|choline (IUPHAR:4551)|Choline (DCF) (KEGG:D07690)|ATN-224 (TTD:D0T8MA)	P11509	CYP2A6	1.17705	11
D-00252	DrugBank:DB00122|IUPHAR:4551|KEGG:D07690|TTD:D08DAE|TTD:D0Q2DE|TTD:D0T8MA	Choline (DrugBank:DB00122)|choline (IUPHAR:4551)|Choline (DCF) (KEGG:D07690)|ATN-224 (TTD:D0T8MA)	P16473	TSHR	1.14992	12
D-00252	DrugBank:DB00122|IUPHAR:4551|KEGG:D07690|TTD:D08DAE|TTD:D0Q2DE|TTD:D0T8MA	Choline (DrugBank:DB00122)|choline (IUPHAR:4551)|Choline (DCF) (KEGG:D07690)|ATN-224 (TTD:D0T8MA)	P28223	HTR2A	1.00155	13
D-00252	DrugBank:DB00122|IUPHAR:4551|KEGG:D07690|TTD:D08DAE|TTD:D0Q2DE|TTD:D0T8MA	Choline (DrugBank:DB00122)|choline (IUPHAR:4551)|Choline (DCF) (KEGG:D07690)|ATN-224 (TTD:D0T8MA)	P23786	CPT2	0.977072	14
D-00252	DrugBank:DB00122|IUPHAR:4551|KEGG:D07690|TTD:D08DAE|TTD:D0Q2DE|TTD:D0T8MA	Choline (DrugBank:DB00122)|choline (IUPHAR:4551)|Choline (DCF) (KEGG:D07690)|ATN-224 (TTD:D0T8MA)	P02708	CHRNA1	0.96041	15
D-00252	DrugBank:DB00122|IUPHAR:4551|KEGG:D07690|TTD:D08DAE|TTD:D0Q2DE|TTD:D0T8MA	Choline (DrugBank:DB00122)|choline (IUPHAR:4551)|Choline (DCF) (KEGG:D07690)|ATN-224 (TTD:D0T8MA)	P46098	HTR3A	0.889322	16
D-00252	DrugBank:DB00122|IUPHAR:4551|KEGG:D07690|TTD:D08DAE|TTD:D0Q2DE|TTD:D0T8MA	Choline (DrugBank:DB00122)|choline (IUPHAR:4551)|Choline (DCF) (KEGG:D07690)|ATN-224 (TTD:D0T8MA)	P10253	GAA	0.80739	17
D-00252	DrugBank:DB00122|IUPHAR:4551|KEGG:D07690|TTD:D08DAE|TTD:D0Q2DE|TTD:D0T8MA	Choline (DrugBank:DB00122)|choline (IUPHAR:4551)|Choline (DCF) (KEGG:D07690)|ATN-224 (TTD:D0T8MA)	P08173	CHRM4	0.769599	18
D-00252	DrugBank:DB00122|IUPHAR:4551|KEGG:D07690|TTD:D08DAE|TTD:D0Q2DE|TTD:D0T8MA	Choline (DrugBank:DB00122)|choline (IUPHAR:4551)|Choline (DCF) (KEGG:D07690)|ATN-224 (TTD:D0T8MA)	O60755	GALR3	0.758502	19
D-00252	DrugBank:DB00122|IUPHAR:4551|KEGG:D07690|TTD:D08DAE|TTD:D0Q2DE|TTD:D0T8MA	Choline (DrugBank:DB00122)|choline (IUPHAR:4551)|Choline (DCF) (KEGG:D07690)|ATN-224 (TTD:D0T8MA)	P06276	BCHE	0.755836	20
D-00253	DrugBank:DB02234|TTD:D0I7VD|TTD:D0V4NQ	S-Ethylisothiourea (DrugBank:DB02234)	Q9Y5N1	HRH3	2.56142	1
D-00253	DrugBank:DB02234|TTD:D0I7VD|TTD:D0V4NQ	S-Ethylisothiourea (DrugBank:DB02234)	Q9H3N8	HRH4	2.51157	2
D-00253	DrugBank:DB02234|TTD:D0I7VD|TTD:D0V4NQ	S-Ethylisothiourea (DrugBank:DB02234)	O94760	DDAH1	2.34703	3
D-00253	DrugBank:DB02234|TTD:D0I7VD|TTD:D0V4NQ	S-Ethylisothiourea (DrugBank:DB02234)	P29475	NOS1	2.34184	Known
D-00253	DrugBank:DB02234|TTD:D0I7VD|TTD:D0V4NQ	S-Ethylisothiourea (DrugBank:DB02234)	Q13936	CACNA1C	2.31714	4
D-00253	DrugBank:DB02234|TTD:D0I7VD|TTD:D0V4NQ	S-Ethylisothiourea (DrugBank:DB02234)	P49281	SLC11A2	2.09691	5
D-00253	DrugBank:DB02234|TTD:D0I7VD|TTD:D0V4NQ	S-Ethylisothiourea (DrugBank:DB02234)	P61073	CXCR4	1.93909	6
D-00253	DrugBank:DB02234|TTD:D0I7VD|TTD:D0V4NQ	S-Ethylisothiourea (DrugBank:DB02234)	P18089	ADRA2B	1.78643	7
D-00253	DrugBank:DB02234|TTD:D0I7VD|TTD:D0V4NQ	S-Ethylisothiourea (DrugBank:DB02234)	P08913	ADRA2A	1.62055	8
D-00253	DrugBank:DB02234|TTD:D0I7VD|TTD:D0V4NQ	S-Ethylisothiourea (DrugBank:DB02234)	P35228	NOS2	1.55833	Known
D-00253	DrugBank:DB02234|TTD:D0I7VD|TTD:D0V4NQ	S-Ethylisothiourea (DrugBank:DB02234)	P31645	SLC6A4	1.48551	9
D-00253	DrugBank:DB02234|TTD:D0I7VD|TTD:D0V4NQ	S-Ethylisothiourea (DrugBank:DB02234)	P25021	HRH2	1.44668	10
D-00253	DrugBank:DB02234|TTD:D0I7VD|TTD:D0V4NQ	S-Ethylisothiourea (DrugBank:DB02234)	P21728	DRD1	1.42677	11
D-00253	DrugBank:DB02234|TTD:D0I7VD|TTD:D0V4NQ	S-Ethylisothiourea (DrugBank:DB02234)	P14416	DRD2	1.39546	12
D-00253	DrugBank:DB02234|TTD:D0I7VD|TTD:D0V4NQ	S-Ethylisothiourea (DrugBank:DB02234)	P08172	CHRM2	1.39399	13
D-00253	DrugBank:DB02234|TTD:D0I7VD|TTD:D0V4NQ	S-Ethylisothiourea (DrugBank:DB02234)	P11137	MAP2	1.38819	14
D-00253	DrugBank:DB02234|TTD:D0I7VD|TTD:D0V4NQ	S-Ethylisothiourea (DrugBank:DB02234)	P35367	HRH1	1.25808	15
D-00253	DrugBank:DB02234|TTD:D0I7VD|TTD:D0V4NQ	S-Ethylisothiourea (DrugBank:DB02234)	P08588	ADRB1	1.21192	16
D-00253	DrugBank:DB02234|TTD:D0I7VD|TTD:D0V4NQ	S-Ethylisothiourea (DrugBank:DB02234)	P41595	HTR2B	1.20222	17
D-00253	DrugBank:DB02234|TTD:D0I7VD|TTD:D0V4NQ	S-Ethylisothiourea (DrugBank:DB02234)	P25100	ADRA1D	1.19519	18
D-00253	DrugBank:DB02234|TTD:D0I7VD|TTD:D0V4NQ	S-Ethylisothiourea (DrugBank:DB02234)	P07550	ADRB2	1.18801	19
D-00253	DrugBank:DB02234|TTD:D0I7VD|TTD:D0V4NQ	S-Ethylisothiourea (DrugBank:DB02234)	Q96RJ0	TAAR1	1.17006	20
D-00253	DrugBank:DB02234|TTD:D0I7VD|TTD:D0V4NQ	S-Ethylisothiourea (DrugBank:DB02234)	P29474	NOS3	0.633227	Known
D-00253	DrugBank:DB02234|TTD:D0I7VD|TTD:D0V4NQ	S-Ethylisothiourea (DrugBank:DB02234)	P10635	CYP2D6	0.525	Known
D-00261	KEGG:D02314	Benzaldehyde (NF) (KEGG:D02314)	O75762	TRPA1	2.9158	1
D-00261	KEGG:D02314	Benzaldehyde (NF) (KEGG:D02314)	Q15822	CHRNA2	1.85772	2
D-00261	KEGG:D02314	Benzaldehyde (NF) (KEGG:D02314)	Q96RJ0	TAAR1	1.69591	3
D-00261	KEGG:D02314	Benzaldehyde (NF) (KEGG:D02314)	P00748	F12	1.60118	4
D-00261	KEGG:D02314	Benzaldehyde (NF) (KEGG:D02314)	P22303	ACHE	1.53108	5
D-00261	KEGG:D02314	Benzaldehyde (NF) (KEGG:D02314)	P32297	CHRNA3	1.51867	6
D-00261	KEGG:D02314	Benzaldehyde (NF) (KEGG:D02314)	P19099	CYP11B2	1.43504	7
D-00261	KEGG:D02314	Benzaldehyde (NF) (KEGG:D02314)	P05177	CYP1A2	1.425	8
D-00261	KEGG:D02314	Benzaldehyde (NF) (KEGG:D02314)	P21397	MAOA	1.38374	9
D-00261	KEGG:D02314	Benzaldehyde (NF) (KEGG:D02314)	P43681	CHRNA4	1.37756	10
D-00261	KEGG:D02314	Benzaldehyde (NF) (KEGG:D02314)	P33261	CYP2C19	1.3625	11
D-00261	KEGG:D02314	Benzaldehyde (NF) (KEGG:D02314)	O60341	KDM1A	1.36057	12
D-00261	KEGG:D02314	Benzaldehyde (NF) (KEGG:D02314)	P23141	CES1	1.2629	13
D-00261	KEGG:D02314	Benzaldehyde (NF) (KEGG:D02314)	P15538	CYP11B1	1.21729	14
D-00261	KEGG:D02314	Benzaldehyde (NF) (KEGG:D02314)	O00519	FAAH	1.1568	15
D-00261	KEGG:D02314	Benzaldehyde (NF) (KEGG:D02314)	P30989	NTSR1	1.15239	16
D-00261	KEGG:D02314	Benzaldehyde (NF) (KEGG:D02314)	P05121	SERPINE1	1.05232	17
D-00261	KEGG:D02314	Benzaldehyde (NF) (KEGG:D02314)	P05181	CYP2E1	1.03658	18
D-00261	KEGG:D02314	Benzaldehyde (NF) (KEGG:D02314)	P00918	CA2	0.998639	19
D-00261	KEGG:D02314	Benzaldehyde (NF) (KEGG:D02314)	Q16696	CYP2A13	0.989006	20
D-00261	KEGG:D02314	Benzaldehyde (NF) (KEGG:D02314)	P11509	CYP2A6	0.959224	Known
D-00261	KEGG:D02314	Benzaldehyde (NF) (KEGG:D02314)	P00352	ALDH1A1	0.850043	Known
D-00267	IUPHAR:6307|TTD:D0M2EM	benzoquinone (IUPHAR:6307)	P49662	CASP4	3.49966	1
D-00267	IUPHAR:6307|TTD:D0M2EM	benzoquinone (IUPHAR:6307)	P51878	CASP5	3.43426	2
D-00267	IUPHAR:6307|TTD:D0M2EM	benzoquinone (IUPHAR:6307)	Q8TDS5	OXER1	2.72219	3
D-00267	IUPHAR:6307|TTD:D0M2EM	benzoquinone (IUPHAR:6307)	P55211	CASP9	2.67265	4
D-00267	IUPHAR:6307|TTD:D0M2EM	benzoquinone (IUPHAR:6307)	P04150	NR3C1	2.62239	5
D-00267	IUPHAR:6307|TTD:D0M2EM	benzoquinone (IUPHAR:6307)	Q14790	CASP8	2.27806	6
D-00267	IUPHAR:6307|TTD:D0M2EM	benzoquinone (IUPHAR:6307)	P42574	CASP3	2.21438	7
D-00267	IUPHAR:6307|TTD:D0M2EM	benzoquinone (IUPHAR:6307)	Q16236	NFE2L2	2.13225	8
D-00267	IUPHAR:6307|TTD:D0M2EM	benzoquinone (IUPHAR:6307)	P13726	F3	2.08858	9
D-00267	IUPHAR:6307|TTD:D0M2EM	benzoquinone (IUPHAR:6307)	P29466	CASP1	1.98858	Known
D-00267	IUPHAR:6307|TTD:D0M2EM	benzoquinone (IUPHAR:6307)	P21397	MAOA	1.90449	Known
D-00267	IUPHAR:6307|TTD:D0M2EM	benzoquinone (IUPHAR:6307)	Q9NY33	DPP3	1.87598	10
D-00267	IUPHAR:6307|TTD:D0M2EM	benzoquinone (IUPHAR:6307)	P00748	F12	1.86744	11
D-00267	IUPHAR:6307|TTD:D0M2EM	benzoquinone (IUPHAR:6307)	P23141	CES1	1.77877	12
D-00267	IUPHAR:6307|TTD:D0M2EM	benzoquinone (IUPHAR:6307)	P06276	BCHE	1.68589	Known
D-00267	IUPHAR:6307|TTD:D0M2EM	benzoquinone (IUPHAR:6307)	P01584	IL1B	1.67586	13
D-00267	IUPHAR:6307|TTD:D0M2EM	benzoquinone (IUPHAR:6307)	P08311	CTSG	1.6616	14
D-00267	IUPHAR:6307|TTD:D0M2EM	benzoquinone (IUPHAR:6307)	P56817	BACE1	1.64149	15
D-00267	IUPHAR:6307|TTD:D0M2EM	benzoquinone (IUPHAR:6307)	P27338	MAOB	1.59229	16
D-00267	IUPHAR:6307|TTD:D0M2EM	benzoquinone (IUPHAR:6307)	P11511	CYP19A1	1.58576	17
D-00267	IUPHAR:6307|TTD:D0M2EM	benzoquinone (IUPHAR:6307)	P08235	NR3C2	1.50432	18
D-00267	IUPHAR:6307|TTD:D0M2EM	benzoquinone (IUPHAR:6307)	O00748	CES2	1.48851	19
D-00267	IUPHAR:6307|TTD:D0M2EM	benzoquinone (IUPHAR:6307)	Q92851	CASP10	1.44258	20
D-00267	IUPHAR:6307|TTD:D0M2EM	benzoquinone (IUPHAR:6307)	P22303	ACHE	1.26999	Known
D-00269	DrugBank:DB01688	P-Cresol (DrugBank:DB01688)	P08172	CHRM2	2.8819	1
D-00269	DrugBank:DB01688	P-Cresol (DrugBank:DB01688)	P29466	CASP1	2.40513	2
D-00269	DrugBank:DB01688	P-Cresol (DrugBank:DB01688)	P00748	F12	2.38546	3
D-00269	DrugBank:DB01688	P-Cresol (DrugBank:DB01688)	Q16539	MAPK14	2.14995	4
D-00269	DrugBank:DB01688	P-Cresol (DrugBank:DB01688)	P21397	MAOA	2.13862	5
D-00269	DrugBank:DB01688	P-Cresol (DrugBank:DB01688)	Q9Y5N1	HRH3	1.94776	6
D-00269	DrugBank:DB01688	P-Cresol (DrugBank:DB01688)	P22303	ACHE	1.89094	Known
D-00269	DrugBank:DB01688	P-Cresol (DrugBank:DB01688)	P03372	ESR1	1.8587	7
D-00269	DrugBank:DB01688	P-Cresol (DrugBank:DB01688)	P00918	CA2	1.77216	8
D-00269	DrugBank:DB01688	P-Cresol (DrugBank:DB01688)	Q92731	ESR2	1.65879	9
D-00269	DrugBank:DB01688	P-Cresol (DrugBank:DB01688)	Q04844	CHRNE	1.62397	10
D-00269	DrugBank:DB01688	P-Cresol (DrugBank:DB01688)	P00915	CA1	1.613	11
D-00269	DrugBank:DB01688	P-Cresol (DrugBank:DB01688)	P31645	SLC6A4	1.58864	12
D-00269	DrugBank:DB01688	P-Cresol (DrugBank:DB01688)	Q6UVM3	KCNT2	1.55625	13
D-00269	DrugBank:DB01688	P-Cresol (DrugBank:DB01688)	P11229	CHRM1	1.5475	14
D-00269	DrugBank:DB01688	P-Cresol (DrugBank:DB01688)	P56817	BACE1	1.49634	15
D-00269	DrugBank:DB01688	P-Cresol (DrugBank:DB01688)	P05067	APP	1.46663	16
D-00269	DrugBank:DB01688	P-Cresol (DrugBank:DB01688)	Q9NY33	DPP3	1.45866	17
D-00269	DrugBank:DB01688	P-Cresol (DrugBank:DB01688)	P14061	HSD17B1	1.38544	18
D-00269	DrugBank:DB01688	P-Cresol (DrugBank:DB01688)	P14324	FDPS	1.30902	19
D-00269	DrugBank:DB01688	P-Cresol (DrugBank:DB01688)	P06276	BCHE	1.30668	20
D-00269	DrugBank:DB01688	P-Cresol (DrugBank:DB01688)	P05177	CYP1A2	0.512793	Known
D-00270	DrugBank:DB01776|KEGG:D04951	M-Cresol (DrugBank:DB01776)|Metacresol (USP) (KEGG:D04951)	P08172	CHRM2	2.96003	1
D-00270	DrugBank:DB01776|KEGG:D04951	M-Cresol (DrugBank:DB01776)|Metacresol (USP) (KEGG:D04951)	P00748	F12	2.7291	2
D-00270	DrugBank:DB01776|KEGG:D04951	M-Cresol (DrugBank:DB01776)|Metacresol (USP) (KEGG:D04951)	P29466	CASP1	2.62854	3
D-00270	DrugBank:DB01776|KEGG:D04951	M-Cresol (DrugBank:DB01776)|Metacresol (USP) (KEGG:D04951)	Q92731	ESR2	2.31736	4
D-00270	DrugBank:DB01776|KEGG:D04951	M-Cresol (DrugBank:DB01776)|Metacresol (USP) (KEGG:D04951)	Q04844	CHRNE	2.20292	5
D-00270	DrugBank:DB01776|KEGG:D04951	M-Cresol (DrugBank:DB01776)|Metacresol (USP) (KEGG:D04951)	P11229	CHRM1	2.03922	6
D-00270	DrugBank:DB01776|KEGG:D04951	M-Cresol (DrugBank:DB01776)|Metacresol (USP) (KEGG:D04951)	Q9Y5N1	HRH3	1.99078	7
D-00270	DrugBank:DB01776|KEGG:D04951	M-Cresol (DrugBank:DB01776)|Metacresol (USP) (KEGG:D04951)	P23141	CES1	1.9558	8
D-00270	DrugBank:DB01776|KEGG:D04951	M-Cresol (DrugBank:DB01776)|Metacresol (USP) (KEGG:D04951)	P56817	BACE1	1.93783	9
D-00270	DrugBank:DB01776|KEGG:D04951	M-Cresol (DrugBank:DB01776)|Metacresol (USP) (KEGG:D04951)	P14324	FDPS	1.70459	10
D-00270	DrugBank:DB01776|KEGG:D04951	M-Cresol (DrugBank:DB01776)|Metacresol (USP) (KEGG:D04951)	P22303	ACHE	1.69708	Known
D-00270	DrugBank:DB01776|KEGG:D04951	M-Cresol (DrugBank:DB01776)|Metacresol (USP) (KEGG:D04951)	O00748	CES2	1.63257	11
D-00270	DrugBank:DB01776|KEGG:D04951	M-Cresol (DrugBank:DB01776)|Metacresol (USP) (KEGG:D04951)	P21397	MAOA	1.60824	12
D-00270	DrugBank:DB01776|KEGG:D04951	M-Cresol (DrugBank:DB01776)|Metacresol (USP) (KEGG:D04951)	P00915	CA1	1.60672	13
D-00270	DrugBank:DB01776|KEGG:D04951	M-Cresol (DrugBank:DB01776)|Metacresol (USP) (KEGG:D04951)	Q8TDS4	HCAR2	1.58769	14
D-00270	DrugBank:DB01776|KEGG:D04951	M-Cresol (DrugBank:DB01776)|Metacresol (USP) (KEGG:D04951)	Q9NY33	DPP3	1.58648	15
D-00270	DrugBank:DB01776|KEGG:D04951	M-Cresol (DrugBank:DB01776)|Metacresol (USP) (KEGG:D04951)	P31645	SLC6A4	1.55915	16
D-00270	DrugBank:DB01776|KEGG:D04951	M-Cresol (DrugBank:DB01776)|Metacresol (USP) (KEGG:D04951)	P05067	APP	1.54362	17
D-00270	DrugBank:DB01776|KEGG:D04951	M-Cresol (DrugBank:DB01776)|Metacresol (USP) (KEGG:D04951)	P14061	HSD17B1	1.38544	18
D-00270	DrugBank:DB01776|KEGG:D04951	M-Cresol (DrugBank:DB01776)|Metacresol (USP) (KEGG:D04951)	P41143	OPRD1	1.33565	19
D-00270	DrugBank:DB01776|KEGG:D04951	M-Cresol (DrugBank:DB01776)|Metacresol (USP) (KEGG:D04951)	P06276	BCHE	1.29695	20
D-00272	IUPHAR:5111|TTD:D0CO8H|TTD:D0O3XZ	2-amino-4-methylpyridine (IUPHAR:5111)	P34913	EPHX2	2.64556	1
D-00272	IUPHAR:5111|TTD:D0CO8H|TTD:D0O3XZ	2-amino-4-methylpyridine (IUPHAR:5111)	Q9Y5N1	HRH3	2.64016	2
D-00272	IUPHAR:5111|TTD:D0CO8H|TTD:D0O3XZ	2-amino-4-methylpyridine (IUPHAR:5111)	P29274	ADORA2A	2.47644	3
D-00272	IUPHAR:5111|TTD:D0CO8H|TTD:D0O3XZ	2-amino-4-methylpyridine (IUPHAR:5111)	P30542	ADORA1	2.2991	4
D-00272	IUPHAR:5111|TTD:D0CO8H|TTD:D0O3XZ	2-amino-4-methylpyridine (IUPHAR:5111)	P41594	GRM5	2.26377	5
D-00272	IUPHAR:5111|TTD:D0CO8H|TTD:D0O3XZ	2-amino-4-methylpyridine (IUPHAR:5111)	O14744	PRMT5	2.19741	6
D-00272	IUPHAR:5111|TTD:D0CO8H|TTD:D0O3XZ	2-amino-4-methylpyridine (IUPHAR:5111)	O94760	DDAH1	2.13072	7
D-00272	IUPHAR:5111|TTD:D0CO8H|TTD:D0O3XZ	2-amino-4-methylpyridine (IUPHAR:5111)	P14324	FDPS	1.96619	8
D-00272	IUPHAR:5111|TTD:D0CO8H|TTD:D0O3XZ	2-amino-4-methylpyridine (IUPHAR:5111)	O43570	CA12	1.96617	9
D-00272	IUPHAR:5111|TTD:D0CO8H|TTD:D0O3XZ	2-amino-4-methylpyridine (IUPHAR:5111)	P19099	CYP11B2	1.81497	10
D-00272	IUPHAR:5111|TTD:D0CO8H|TTD:D0O3XZ	2-amino-4-methylpyridine (IUPHAR:5111)	P29475	NOS1	1.80277	Known
D-00272	IUPHAR:5111|TTD:D0CO8H|TTD:D0O3XZ	2-amino-4-methylpyridine (IUPHAR:5111)	P35228	NOS2	1.74043	Known
D-00272	IUPHAR:5111|TTD:D0CO8H|TTD:D0O3XZ	2-amino-4-methylpyridine (IUPHAR:5111)	Q8NEB9	PIK3C3	1.69933	11
D-00272	IUPHAR:5111|TTD:D0CO8H|TTD:D0O3XZ	2-amino-4-methylpyridine (IUPHAR:5111)	P29474	NOS3	1.69063	Known
D-00272	IUPHAR:5111|TTD:D0CO8H|TTD:D0O3XZ	2-amino-4-methylpyridine (IUPHAR:5111)	P42336	PIK3CA	1.67892	12
D-00272	IUPHAR:5111|TTD:D0CO8H|TTD:D0O3XZ	2-amino-4-methylpyridine (IUPHAR:5111)	P11137	MAP2	1.66026	13
D-00272	IUPHAR:5111|TTD:D0CO8H|TTD:D0O3XZ	2-amino-4-methylpyridine (IUPHAR:5111)	Q16790	CA9	1.61174	14
D-00272	IUPHAR:5111|TTD:D0CO8H|TTD:D0O3XZ	2-amino-4-methylpyridine (IUPHAR:5111)	P00374	DHFR	1.60599	15
D-00272	IUPHAR:5111|TTD:D0CO8H|TTD:D0O3XZ	2-amino-4-methylpyridine (IUPHAR:5111)	Q99705	MCHR1	1.53	16
D-00272	IUPHAR:5111|TTD:D0CO8H|TTD:D0O3XZ	2-amino-4-methylpyridine (IUPHAR:5111)	P05093	CYP17A1	1.52829	17
D-00272	IUPHAR:5111|TTD:D0CO8H|TTD:D0O3XZ	2-amino-4-methylpyridine (IUPHAR:5111)	P05067	APP	1.49552	18
D-00272	IUPHAR:5111|TTD:D0CO8H|TTD:D0O3XZ	2-amino-4-methylpyridine (IUPHAR:5111)	P35367	HRH1	1.46361	19
D-00272	IUPHAR:5111|TTD:D0CO8H|TTD:D0O3XZ	2-amino-4-methylpyridine (IUPHAR:5111)	P27815	PDE4A	1.42543	20
D-00276	DrugBank:DB14144|TTD:D07MTM	p-Aminophenol (DrugBank:DB14144)	P00915	CA1	2.04587	1
D-00276	DrugBank:DB14144|TTD:D07MTM	p-Aminophenol (DrugBank:DB14144)	P22748	CA4	1.87978	2
D-00276	DrugBank:DB14144|TTD:D07MTM	p-Aminophenol (DrugBank:DB14144)	P23280	CA6	1.22584	3
D-00276	DrugBank:DB14144|TTD:D07MTM	p-Aminophenol (DrugBank:DB14144)	P00918	CA2	1.12869	4
D-00276	DrugBank:DB14144|TTD:D07MTM	p-Aminophenol (DrugBank:DB14144)	Q8N1Q1	CA13	1.12384	5
D-00276	DrugBank:DB14144|TTD:D07MTM	p-Aminophenol (DrugBank:DB14144)	P27695	APEX1	0.988756	6
D-00276	DrugBank:DB14144|TTD:D07MTM	p-Aminophenol (DrugBank:DB14144)	P16473	TSHR	0.976121	7
D-00276	DrugBank:DB14144|TTD:D07MTM	p-Aminophenol (DrugBank:DB14144)	P05067	APP	0.969403	8
D-00276	DrugBank:DB14144|TTD:D07MTM	p-Aminophenol (DrugBank:DB14144)	O75493	CA11	0.956561	9
D-00276	DrugBank:DB14144|TTD:D07MTM	p-Aminophenol (DrugBank:DB14144)	P16050	ALOX15	0.952883	10
D-00276	DrugBank:DB14144|TTD:D07MTM	p-Aminophenol (DrugBank:DB14144)	Q16665	HIF1A	0.890624	11
D-00276	DrugBank:DB14144|TTD:D07MTM	p-Aminophenol (DrugBank:DB14144)	Q99714	HSD17B10	0.887494	Known
D-00276	DrugBank:DB14144|TTD:D07MTM	p-Aminophenol (DrugBank:DB14144)	P43166	CA7	0.876971	12
D-00276	DrugBank:DB14144|TTD:D07MTM	p-Aminophenol (DrugBank:DB14144)	P05121	SERPINE1	0.843092	13
D-00276	DrugBank:DB14144|TTD:D07MTM	p-Aminophenol (DrugBank:DB14144)	P35218	CA5A	0.749333	14
D-00276	DrugBank:DB14144|TTD:D07MTM	p-Aminophenol (DrugBank:DB14144)	O75874	IDH1	0.742451	15
D-00276	DrugBank:DB14144|TTD:D07MTM	p-Aminophenol (DrugBank:DB14144)	P35372	OPRM1	0.683265	16
D-00276	DrugBank:DB14144|TTD:D07MTM	p-Aminophenol (DrugBank:DB14144)	P43220	GLP1R	0.648462	17
D-00276	DrugBank:DB14144|TTD:D07MTM	p-Aminophenol (DrugBank:DB14144)	P40225	THPO	0.643885	18
D-00276	DrugBank:DB14144|TTD:D07MTM	p-Aminophenol (DrugBank:DB14144)	O75496	GMNN	0.622228	19
D-00276	DrugBank:DB14144|TTD:D07MTM	p-Aminophenol (DrugBank:DB14144)	Q9NY33	DPP3	0.604833	20
D-00276	DrugBank:DB14144|TTD:D07MTM	p-Aminophenol (DrugBank:DB14144)	Q9NUW8	TDP1	0.388415	Known
D-00276	DrugBank:DB14144|TTD:D07MTM	p-Aminophenol (DrugBank:DB14144)	P84022	SMAD3	0.310777	Known
D-00276	DrugBank:DB14144|TTD:D07MTM	p-Aminophenol (DrugBank:DB14144)	Q9UNA4	POLI	0.230954	Known
D-00276	DrugBank:DB14144|TTD:D07MTM	p-Aminophenol (DrugBank:DB14144)	P07451	CA3	0.20646	Known
D-00281	DrugBank:DB09526|KEGG:D00073|TTD:D03UOT|TTD:D08LQA	Hydroquinone (DrugBank:DB09526)|Hydroquinone (USP) (KEGG:D00073)	P00915	CA1	2.04587	Known
D-00281	DrugBank:DB09526|KEGG:D00073|TTD:D03UOT|TTD:D08LQA	Hydroquinone (DrugBank:DB09526)|Hydroquinone (USP) (KEGG:D00073)	O75493	CA11	1.91718	1
D-00281	DrugBank:DB09526|KEGG:D00073|TTD:D03UOT|TTD:D08LQA	Hydroquinone (DrugBank:DB09526)|Hydroquinone (USP) (KEGG:D00073)	P22748	CA4	1.87978	Known
D-00281	DrugBank:DB09526|KEGG:D00073|TTD:D03UOT|TTD:D08LQA	Hydroquinone (DrugBank:DB09526)|Hydroquinone (USP) (KEGG:D00073)	Q9NY33	DPP3	1.60028	2
D-00281	DrugBank:DB09526|KEGG:D00073|TTD:D03UOT|TTD:D08LQA	Hydroquinone (DrugBank:DB09526)|Hydroquinone (USP) (KEGG:D00073)	P05121	SERPINE1	1.46572	3
D-00281	DrugBank:DB09526|KEGG:D00073|TTD:D03UOT|TTD:D08LQA	Hydroquinone (DrugBank:DB09526)|Hydroquinone (USP) (KEGG:D00073)	P05067	APP	1.40994	4
D-00281	DrugBank:DB09526|KEGG:D00073|TTD:D03UOT|TTD:D08LQA	Hydroquinone (DrugBank:DB09526)|Hydroquinone (USP) (KEGG:D00073)	Q16678	CYP1B1	1.35577	5
D-00281	DrugBank:DB09526|KEGG:D00073|TTD:D03UOT|TTD:D08LQA	Hydroquinone (DrugBank:DB09526)|Hydroquinone (USP) (KEGG:D00073)	Q16539	MAPK14	1.33868	6
D-00281	DrugBank:DB09526|KEGG:D00073|TTD:D03UOT|TTD:D08LQA	Hydroquinone (DrugBank:DB09526)|Hydroquinone (USP) (KEGG:D00073)	P40225	THPO	1.29715	7
D-00281	DrugBank:DB09526|KEGG:D00073|TTD:D03UOT|TTD:D08LQA	Hydroquinone (DrugBank:DB09526)|Hydroquinone (USP) (KEGG:D00073)	Q92731	ESR2	1.28752	8
D-00281	DrugBank:DB09526|KEGG:D00073|TTD:D03UOT|TTD:D08LQA	Hydroquinone (DrugBank:DB09526)|Hydroquinone (USP) (KEGG:D00073)	P14061	HSD17B1	1.28405	9
D-00281	DrugBank:DB09526|KEGG:D00073|TTD:D03UOT|TTD:D08LQA	Hydroquinone (DrugBank:DB09526)|Hydroquinone (USP) (KEGG:D00073)	P00918	CA2	1.26146	Known
D-00281	DrugBank:DB09526|KEGG:D00073|TTD:D03UOT|TTD:D08LQA	Hydroquinone (DrugBank:DB09526)|Hydroquinone (USP) (KEGG:D00073)	P23280	CA6	1.22584	Known
D-00281	DrugBank:DB09526|KEGG:D00073|TTD:D03UOT|TTD:D08LQA	Hydroquinone (DrugBank:DB09526)|Hydroquinone (USP) (KEGG:D00073)	P61073	CXCR4	1.22439	10
D-00281	DrugBank:DB09526|KEGG:D00073|TTD:D03UOT|TTD:D08LQA	Hydroquinone (DrugBank:DB09526)|Hydroquinone (USP) (KEGG:D00073)	P27695	APEX1	1.17	11
D-00281	DrugBank:DB09526|KEGG:D00073|TTD:D03UOT|TTD:D08LQA	Hydroquinone (DrugBank:DB09526)|Hydroquinone (USP) (KEGG:D00073)	P10827	THRA	1.15721	12
D-00281	DrugBank:DB09526|KEGG:D00073|TTD:D03UOT|TTD:D08LQA	Hydroquinone (DrugBank:DB09526)|Hydroquinone (USP) (KEGG:D00073)	P00533	EGFR	1.13327	13
D-00281	DrugBank:DB09526|KEGG:D00073|TTD:D03UOT|TTD:D08LQA	Hydroquinone (DrugBank:DB09526)|Hydroquinone (USP) (KEGG:D00073)	O75608	LYPLA1	1.12547	14
D-00281	DrugBank:DB09526|KEGG:D00073|TTD:D03UOT|TTD:D08LQA	Hydroquinone (DrugBank:DB09526)|Hydroquinone (USP) (KEGG:D00073)	P41143	OPRD1	1.10168	15
D-00281	DrugBank:DB09526|KEGG:D00073|TTD:D03UOT|TTD:D08LQA	Hydroquinone (DrugBank:DB09526)|Hydroquinone (USP) (KEGG:D00073)	P41145	OPRK1	1.07442	16
D-00281	DrugBank:DB09526|KEGG:D00073|TTD:D03UOT|TTD:D08LQA	Hydroquinone (DrugBank:DB09526)|Hydroquinone (USP) (KEGG:D00073)	Q00987	MDM2	1.03307	17
D-00281	DrugBank:DB09526|KEGG:D00073|TTD:D03UOT|TTD:D08LQA	Hydroquinone (DrugBank:DB09526)|Hydroquinone (USP) (KEGG:D00073)	P16152	CBR1	1.03235	18
D-00281	DrugBank:DB09526|KEGG:D00073|TTD:D03UOT|TTD:D08LQA	Hydroquinone (DrugBank:DB09526)|Hydroquinone (USP) (KEGG:D00073)	P06239	LCK	1.02212	19
D-00281	DrugBank:DB09526|KEGG:D00073|TTD:D03UOT|TTD:D08LQA	Hydroquinone (DrugBank:DB09526)|Hydroquinone (USP) (KEGG:D00073)	P16473	TSHR	1.01997	20
D-00281	DrugBank:DB09526|KEGG:D00073|TTD:D03UOT|TTD:D08LQA	Hydroquinone (DrugBank:DB09526)|Hydroquinone (USP) (KEGG:D00073)	Q16665	HIF1A	0.924998	Known
D-00281	DrugBank:DB09526|KEGG:D00073|TTD:D03UOT|TTD:D08LQA	Hydroquinone (DrugBank:DB09526)|Hydroquinone (USP) (KEGG:D00073)	Q99714	HSD17B10	0.887494	Known
D-00281	DrugBank:DB09526|KEGG:D00073|TTD:D03UOT|TTD:D08LQA	Hydroquinone (DrugBank:DB09526)|Hydroquinone (USP) (KEGG:D00073)	Q96KQ7	EHMT2	0.525895	Known
D-00281	DrugBank:DB09526|KEGG:D00073|TTD:D03UOT|TTD:D08LQA	Hydroquinone (DrugBank:DB09526)|Hydroquinone (USP) (KEGG:D00073)	Q16236	NFE2L2	0.3857	Known
D-00281	DrugBank:DB09526|KEGG:D00073|TTD:D03UOT|TTD:D08LQA	Hydroquinone (DrugBank:DB09526)|Hydroquinone (USP) (KEGG:D00073)	P15428	HPGD	0.224999	Known
D-00281	DrugBank:DB09526|KEGG:D00073|TTD:D03UOT|TTD:D08LQA	Hydroquinone (DrugBank:DB09526)|Hydroquinone (USP) (KEGG:D00073)	P07451	CA3	0.212756	Known
D-00281	DrugBank:DB09526|KEGG:D00073|TTD:D03UOT|TTD:D08LQA	Hydroquinone (DrugBank:DB09526)|Hydroquinone (USP) (KEGG:D00073)	O43570	CA12	0.0799166	Known
D-00282	DrugBank:DB11085|KEGG:D00133|TTD:D02DBP	Resorcinol (DrugBank:DB11085)|Resorcinol (USP) (KEGG:D00133)	O75493	CA11	3.24413	1
D-00282	DrugBank:DB11085|KEGG:D00133|TTD:D02DBP	Resorcinol (DrugBank:DB11085)|Resorcinol (USP) (KEGG:D00133)	P00533	EGFR	1.98826	2
D-00282	DrugBank:DB11085|KEGG:D00133|TTD:D02DBP	Resorcinol (DrugBank:DB11085)|Resorcinol (USP) (KEGG:D00133)	P22748	CA4	1.87978	3
D-00282	DrugBank:DB11085|KEGG:D00133|TTD:D02DBP	Resorcinol (DrugBank:DB11085)|Resorcinol (USP) (KEGG:D00133)	Q9NY33	DPP3	1.63608	4
D-00282	DrugBank:DB11085|KEGG:D00133|TTD:D02DBP	Resorcinol (DrugBank:DB11085)|Resorcinol (USP) (KEGG:D00133)	P05067	APP	1.59815	5
D-00282	DrugBank:DB11085|KEGG:D00133|TTD:D02DBP	Resorcinol (DrugBank:DB11085)|Resorcinol (USP) (KEGG:D00133)	Q16539	MAPK14	1.57952	6
D-00282	DrugBank:DB11085|KEGG:D00133|TTD:D02DBP	Resorcinol (DrugBank:DB11085)|Resorcinol (USP) (KEGG:D00133)	P61073	CXCR4	1.406	7
D-00282	DrugBank:DB11085|KEGG:D00133|TTD:D02DBP	Resorcinol (DrugBank:DB11085)|Resorcinol (USP) (KEGG:D00133)	P37058	HSD17B3	1.40147	8
D-00282	DrugBank:DB11085|KEGG:D00133|TTD:D02DBP	Resorcinol (DrugBank:DB11085)|Resorcinol (USP) (KEGG:D00133)	P00915	CA1	1.29845	9
D-00282	DrugBank:DB11085|KEGG:D00133|TTD:D02DBP	Resorcinol (DrugBank:DB11085)|Resorcinol (USP) (KEGG:D00133)	P14061	HSD17B1	1.28405	10
D-00282	DrugBank:DB11085|KEGG:D00133|TTD:D02DBP	Resorcinol (DrugBank:DB11085)|Resorcinol (USP) (KEGG:D00133)	P00918	CA2	1.26146	Known
D-00282	DrugBank:DB11085|KEGG:D00133|TTD:D02DBP	Resorcinol (DrugBank:DB11085)|Resorcinol (USP) (KEGG:D00133)	P11413	G6PD	1.25847	11
D-00282	DrugBank:DB11085|KEGG:D00133|TTD:D02DBP	Resorcinol (DrugBank:DB11085)|Resorcinol (USP) (KEGG:D00133)	P41143	OPRD1	1.23851	12
D-00282	DrugBank:DB11085|KEGG:D00133|TTD:D02DBP	Resorcinol (DrugBank:DB11085)|Resorcinol (USP) (KEGG:D00133)	P28715	ERCC5	1.226	13
D-00282	DrugBank:DB11085|KEGG:D00133|TTD:D02DBP	Resorcinol (DrugBank:DB11085)|Resorcinol (USP) (KEGG:D00133)	P23280	CA6	1.22584	14
D-00282	DrugBank:DB11085|KEGG:D00133|TTD:D02DBP	Resorcinol (DrugBank:DB11085)|Resorcinol (USP) (KEGG:D00133)	P05121	SERPINE1	1.22224	15
D-00282	DrugBank:DB11085|KEGG:D00133|TTD:D02DBP	Resorcinol (DrugBank:DB11085)|Resorcinol (USP) (KEGG:D00133)	P41145	OPRK1	1.21004	16
D-00282	DrugBank:DB11085|KEGG:D00133|TTD:D02DBP	Resorcinol (DrugBank:DB11085)|Resorcinol (USP) (KEGG:D00133)	P53779	MAPK10	1.19385	17
D-00282	DrugBank:DB11085|KEGG:D00133|TTD:D02DBP	Resorcinol (DrugBank:DB11085)|Resorcinol (USP) (KEGG:D00133)	P11511	CYP19A1	1.19384	18
D-00282	DrugBank:DB11085|KEGG:D00133|TTD:D02DBP	Resorcinol (DrugBank:DB11085)|Resorcinol (USP) (KEGG:D00133)	Q16678	CYP1B1	1.18339	19
D-00282	DrugBank:DB11085|KEGG:D00133|TTD:D02DBP	Resorcinol (DrugBank:DB11085)|Resorcinol (USP) (KEGG:D00133)	P14679	TYR	1.11987	20
D-00282	DrugBank:DB11085|KEGG:D00133|TTD:D02DBP	Resorcinol (DrugBank:DB11085)|Resorcinol (USP) (KEGG:D00133)	Q9Y2D0	CA5B	0.249956	Known
D-00282	DrugBank:DB11085|KEGG:D00133|TTD:D02DBP	Resorcinol (DrugBank:DB11085)|Resorcinol (USP) (KEGG:D00133)	P35218	CA5A	0.238619	Known
D-00282	DrugBank:DB11085|KEGG:D00133|TTD:D02DBP	Resorcinol (DrugBank:DB11085)|Resorcinol (USP) (KEGG:D00133)	O43570	CA12	0.0799166	Known
D-00283	DrugBank:DB02232	1,2-Dihydroxybenzene (DrugBank:DB02232)	P28715	ERCC5	2.79729	1
D-00283	DrugBank:DB02232	1,2-Dihydroxybenzene (DrugBank:DB02232)	P35398	RORA	2.06605	2
D-00283	DrugBank:DB02232	1,2-Dihydroxybenzene (DrugBank:DB02232)	P22748	CA4	1.87978	Known
D-00283	DrugBank:DB02232	1,2-Dihydroxybenzene (DrugBank:DB02232)	P00915	CA1	1.43888	3
D-00283	DrugBank:DB02232	1,2-Dihydroxybenzene (DrugBank:DB02232)	O75493	CA11	1.24495	4
D-00283	DrugBank:DB02232	1,2-Dihydroxybenzene (DrugBank:DB02232)	P23280	CA6	1.22584	Known
D-00283	DrugBank:DB02232	1,2-Dihydroxybenzene (DrugBank:DB02232)	P14061	HSD17B1	1.2227	5
D-00283	DrugBank:DB02232	1,2-Dihydroxybenzene (DrugBank:DB02232)	P27695	APEX1	1.17	6
D-00283	DrugBank:DB02232	1,2-Dihydroxybenzene (DrugBank:DB02232)	P05121	SERPINE1	1.12908	7
D-00283	DrugBank:DB02232	1,2-Dihydroxybenzene (DrugBank:DB02232)	Q92731	ESR2	1.08123	8
D-00283	DrugBank:DB02232	1,2-Dihydroxybenzene (DrugBank:DB02232)	P00918	CA2	1.07469	Known
D-00283	DrugBank:DB02232	1,2-Dihydroxybenzene (DrugBank:DB02232)	Q9NY33	DPP3	1.04605	9
D-00283	DrugBank:DB02232	1,2-Dihydroxybenzene (DrugBank:DB02232)	P40225	THPO	1.03727	10
D-00283	DrugBank:DB02232	1,2-Dihydroxybenzene (DrugBank:DB02232)	P16050	ALOX15	1.00288	11
D-00283	DrugBank:DB02232	1,2-Dihydroxybenzene (DrugBank:DB02232)	P05067	APP	0.984819	12
D-00283	DrugBank:DB02232	1,2-Dihydroxybenzene (DrugBank:DB02232)	P11511	CYP19A1	0.975253	13
D-00283	DrugBank:DB02232	1,2-Dihydroxybenzene (DrugBank:DB02232)	P21964	COMT	0.962521	14
D-00283	DrugBank:DB02232	1,2-Dihydroxybenzene (DrugBank:DB02232)	P06746	POLB	0.927132	15
D-00283	DrugBank:DB02232	1,2-Dihydroxybenzene (DrugBank:DB02232)	Q99714	HSD17B10	0.887494	Known
D-00283	DrugBank:DB02232	1,2-Dihydroxybenzene (DrugBank:DB02232)	P39748	FEN1	0.873821	Known
D-00283	DrugBank:DB02232	1,2-Dihydroxybenzene (DrugBank:DB02232)	P21728	DRD1	0.867528	16
D-00283	DrugBank:DB02232	1,2-Dihydroxybenzene (DrugBank:DB02232)	O75608	LYPLA1	0.853269	17
D-00283	DrugBank:DB02232	1,2-Dihydroxybenzene (DrugBank:DB02232)	Q16539	MAPK14	0.845184	18
D-00283	DrugBank:DB02232	1,2-Dihydroxybenzene (DrugBank:DB02232)	P53779	MAPK10	0.80928	19
D-00283	DrugBank:DB02232	1,2-Dihydroxybenzene (DrugBank:DB02232)	Q16678	CYP1B1	0.783722	20
D-00283	DrugBank:DB02232	1,2-Dihydroxybenzene (DrugBank:DB02232)	Q96KQ7	EHMT2	0.69301	Known
D-00283	DrugBank:DB02232	1,2-Dihydroxybenzene (DrugBank:DB02232)	P03372	ESR1	0.542544	Known
D-00283	DrugBank:DB02232	1,2-Dihydroxybenzene (DrugBank:DB02232)	P51449	RORC	0.300068	Known
D-00283	DrugBank:DB02232	1,2-Dihydroxybenzene (DrugBank:DB02232)	Q9Y2D0	CA5B	0.249956	Known
D-00283	DrugBank:DB02232	1,2-Dihydroxybenzene (DrugBank:DB02232)	O43570	CA12	0.0799166	Known
D-00286	TTD:D0DI7W		Q13224	GRIN2B	3.04293	1
D-00286	TTD:D0DI7W		Q9Y2I1	NISCH	2.68752	2
D-00286	TTD:D0DI7W		P61964	WDR5	2.39139	3
D-00286	TTD:D0DI7W		O94760	DDAH1	2.27849	4
D-00286	TTD:D0DI7W		Q03426	MVK	2.2336	5
D-00286	TTD:D0DI7W		P08913	ADRA2A	2.19536	6
D-00286	TTD:D0DI7W		P48449	LSS	2.18536	7
D-00286	TTD:D0DI7W		P02753	RBP4	2.14235	8
D-00286	TTD:D0DI7W		P49356	FNTB	2.14052	9
D-00286	TTD:D0DI7W		P02768	ALB	1.85655	10
D-00286	TTD:D0DI7W		O95749	GGPS1	1.65906	11
D-00286	TTD:D0DI7W		P06756	ITGAV	1.55384	12
D-00286	TTD:D0DI7W		P09958	FURIN	1.47839	13
D-00286	TTD:D0DI7W		P61073	CXCR4	1.47157	14
D-00286	TTD:D0DI7W		P00918	CA2	1.4648	15
D-00286	TTD:D0DI7W		P19838	NFKB1	1.43763	16
D-00286	TTD:D0DI7W		Q14534	SQLE	1.41288	17
D-00286	TTD:D0DI7W		P07477	PRSS1	1.35246	18
D-00286	TTD:D0DI7W		P10275	AR	1.34074	19
D-00286	TTD:D0DI7W		P49286	MTNR1B	1.30734	20
D-00286	TTD:D0DI7W		P29474	NOS3	1.01768	Known
D-00286	TTD:D0DI7W		P35228	NOS2	0.972018	Known
D-00287	TTD:D06PFL		P08913	ADRA2A	3.19454	1
D-00287	TTD:D06PFL		Q9Y2I1	NISCH	2.68752	2
D-00287	TTD:D06PFL		O94760	DDAH1	2.27849	3
D-00287	TTD:D06PFL		Q03426	MVK	2.2336	4
D-00287	TTD:D06PFL		P00918	CA2	2.15788	5
D-00287	TTD:D06PFL		Q14534	SQLE	1.9566	6
D-00287	TTD:D06PFL		P10275	AR	1.94215	7
D-00287	TTD:D06PFL		Q9H1C0	LPAR5	1.91948	8
D-00287	TTD:D06PFL		P49286	MTNR1B	1.89376	9
D-00287	TTD:D06PFL		Q9Y2T6	GPR55	1.73573	10
D-00287	TTD:D06PFL		O43570	CA12	1.6835	11
D-00287	TTD:D06PFL		O95749	GGPS1	1.65906	12
D-00287	TTD:D06PFL		P35348	ADRA1A	1.65697	13
D-00287	TTD:D06PFL		Q16790	CA9	1.63984	14
D-00287	TTD:D06PFL		P53602	MVD	1.61296	15
D-00287	TTD:D06PFL		P41252	IARS	1.59227	16
D-00287	TTD:D06PFL		Q8NER1	TRPV1	1.52981	17
D-00287	TTD:D06PFL		Q9UBY5	LPAR3	1.50488	18
D-00287	TTD:D06PFL		P06276	BCHE	1.50464	19
D-00287	TTD:D06PFL		P04278	SHBG	1.49034	20
D-00287	TTD:D06PFL		P35228	NOS2	1.19477	Known
D-00287	TTD:D06PFL		P29474	NOS3	0.973559	Known
D-00296	DrugBank:DB05381|KEGG:D04444|KEGG:D04445|KEGG:D08040	Histamine (DrugBank:DB05381)|Histamine dihydrochloride (USAN) (KEGG:D04444)|Histamine phosphate (USP) (KEGG:D04445)|Histamine (DCF) (KEGG:D08040)	P25100	ADRA1D	3.66195	1
D-00296	DrugBank:DB05381|KEGG:D04444|KEGG:D04445|KEGG:D08040	Histamine (DrugBank:DB05381)|Histamine dihydrochloride (USAN) (KEGG:D04444)|Histamine phosphate (USP) (KEGG:D04445)|Histamine (DCF) (KEGG:D08040)	P14416	DRD2	3.25889	2
D-00296	DrugBank:DB05381|KEGG:D04444|KEGG:D04445|KEGG:D08040	Histamine (DrugBank:DB05381)|Histamine dihydrochloride (USAN) (KEGG:D04444)|Histamine phosphate (USP) (KEGG:D04445)|Histamine (DCF) (KEGG:D08040)	P18089	ADRA2B	3.23781	3
D-00296	DrugBank:DB05381|KEGG:D04444|KEGG:D04445|KEGG:D08040	Histamine (DrugBank:DB05381)|Histamine dihydrochloride (USAN) (KEGG:D04444)|Histamine phosphate (USP) (KEGG:D04445)|Histamine (DCF) (KEGG:D08040)	P00797	REN	3.12086	4
D-00296	DrugBank:DB05381|KEGG:D04444|KEGG:D04445|KEGG:D08040	Histamine (DrugBank:DB05381)|Histamine dihydrochloride (USAN) (KEGG:D04444)|Histamine phosphate (USP) (KEGG:D04445)|Histamine (DCF) (KEGG:D08040)	P34969	HTR7	3.02044	5
D-00296	DrugBank:DB05381|KEGG:D04444|KEGG:D04445|KEGG:D08040	Histamine (DrugBank:DB05381)|Histamine dihydrochloride (USAN) (KEGG:D04444)|Histamine phosphate (USP) (KEGG:D04445)|Histamine (DCF) (KEGG:D08040)	Q9Y5N1	HRH3	2.941	Known
D-00296	DrugBank:DB05381|KEGG:D04444|KEGG:D04445|KEGG:D08040	Histamine (DrugBank:DB05381)|Histamine dihydrochloride (USAN) (KEGG:D04444)|Histamine phosphate (USP) (KEGG:D04445)|Histamine (DCF) (KEGG:D08040)	P18825	ADRA2C	2.88713	6
D-00296	DrugBank:DB05381|KEGG:D04444|KEGG:D04445|KEGG:D08040	Histamine (DrugBank:DB05381)|Histamine dihydrochloride (USAN) (KEGG:D04444)|Histamine phosphate (USP) (KEGG:D04445)|Histamine (DCF) (KEGG:D08040)	P08913	ADRA2A	2.77033	7
D-00296	DrugBank:DB05381|KEGG:D04444|KEGG:D04445|KEGG:D08040	Histamine (DrugBank:DB05381)|Histamine dihydrochloride (USAN) (KEGG:D04444)|Histamine phosphate (USP) (KEGG:D04445)|Histamine (DCF) (KEGG:D08040)	P28221	HTR1D	2.70161	8
D-00296	DrugBank:DB05381|KEGG:D04444|KEGG:D04445|KEGG:D08040	Histamine (DrugBank:DB05381)|Histamine dihydrochloride (USAN) (KEGG:D04444)|Histamine phosphate (USP) (KEGG:D04445)|Histamine (DCF) (KEGG:D08040)	P41595	HTR2B	2.68454	9
D-00296	DrugBank:DB05381|KEGG:D04444|KEGG:D04445|KEGG:D08040	Histamine (DrugBank:DB05381)|Histamine dihydrochloride (USAN) (KEGG:D04444)|Histamine phosphate (USP) (KEGG:D04445)|Histamine (DCF) (KEGG:D08040)	P08908	HTR1A	2.42725	10
D-00296	DrugBank:DB05381|KEGG:D04444|KEGG:D04445|KEGG:D08040	Histamine (DrugBank:DB05381)|Histamine dihydrochloride (USAN) (KEGG:D04444)|Histamine phosphate (USP) (KEGG:D04445)|Histamine (DCF) (KEGG:D08040)	P35462	DRD3	2.36829	11
D-00296	DrugBank:DB05381|KEGG:D04444|KEGG:D04445|KEGG:D08040	Histamine (DrugBank:DB05381)|Histamine dihydrochloride (USAN) (KEGG:D04444)|Histamine phosphate (USP) (KEGG:D04445)|Histamine (DCF) (KEGG:D08040)	Q9H3N8	HRH4	2.20866	Known
D-00296	DrugBank:DB05381|KEGG:D04444|KEGG:D04445|KEGG:D08040	Histamine (DrugBank:DB05381)|Histamine dihydrochloride (USAN) (KEGG:D04444)|Histamine phosphate (USP) (KEGG:D04445)|Histamine (DCF) (KEGG:D08040)	P28222	HTR1B	2.12223	12
D-00296	DrugBank:DB05381|KEGG:D04444|KEGG:D04445|KEGG:D08040	Histamine (DrugBank:DB05381)|Histamine dihydrochloride (USAN) (KEGG:D04444)|Histamine phosphate (USP) (KEGG:D04445)|Histamine (DCF) (KEGG:D08040)	P21917	DRD4	2.08543	13
D-00296	DrugBank:DB05381|KEGG:D04444|KEGG:D04445|KEGG:D08040	Histamine (DrugBank:DB05381)|Histamine dihydrochloride (USAN) (KEGG:D04444)|Histamine phosphate (USP) (KEGG:D04445)|Histamine (DCF) (KEGG:D08040)	P07550	ADRB2	1.89417	14
D-00296	DrugBank:DB05381|KEGG:D04444|KEGG:D04445|KEGG:D08040	Histamine (DrugBank:DB05381)|Histamine dihydrochloride (USAN) (KEGG:D04444)|Histamine phosphate (USP) (KEGG:D04445)|Histamine (DCF) (KEGG:D08040)	P50406	HTR6	1.85705	15
D-00296	DrugBank:DB05381|KEGG:D04444|KEGG:D04445|KEGG:D08040	Histamine (DrugBank:DB05381)|Histamine dihydrochloride (USAN) (KEGG:D04444)|Histamine phosphate (USP) (KEGG:D04445)|Histamine (DCF) (KEGG:D08040)	P21728	DRD1	1.85258	16
D-00296	DrugBank:DB05381|KEGG:D04444|KEGG:D04445|KEGG:D08040	Histamine (DrugBank:DB05381)|Histamine dihydrochloride (USAN) (KEGG:D04444)|Histamine phosphate (USP) (KEGG:D04445)|Histamine (DCF) (KEGG:D08040)	P28335	HTR2C	1.78749	17
D-00296	DrugBank:DB05381|KEGG:D04444|KEGG:D04445|KEGG:D08040	Histamine (DrugBank:DB05381)|Histamine dihydrochloride (USAN) (KEGG:D04444)|Histamine phosphate (USP) (KEGG:D04445)|Histamine (DCF) (KEGG:D08040)	P28223	HTR2A	1.75205	18
D-00296	DrugBank:DB05381|KEGG:D04444|KEGG:D04445|KEGG:D08040	Histamine (DrugBank:DB05381)|Histamine dihydrochloride (USAN) (KEGG:D04444)|Histamine phosphate (USP) (KEGG:D04445)|Histamine (DCF) (KEGG:D08040)	P08173	CHRM4	1.70808	19
D-00296	DrugBank:DB05381|KEGG:D04444|KEGG:D04445|KEGG:D08040	Histamine (DrugBank:DB05381)|Histamine dihydrochloride (USAN) (KEGG:D04444)|Histamine phosphate (USP) (KEGG:D04445)|Histamine (DCF) (KEGG:D08040)	P20309	CHRM3	1.56951	20
D-00296	DrugBank:DB05381|KEGG:D04444|KEGG:D04445|KEGG:D08040	Histamine (DrugBank:DB05381)|Histamine dihydrochloride (USAN) (KEGG:D04444)|Histamine phosphate (USP) (KEGG:D04445)|Histamine (DCF) (KEGG:D08040)	P35367	HRH1	0.986324	Known
D-00296	DrugBank:DB05381|KEGG:D04444|KEGG:D04445|KEGG:D08040	Histamine (DrugBank:DB05381)|Histamine dihydrochloride (USAN) (KEGG:D04444)|Histamine phosphate (USP) (KEGG:D04445)|Histamine (DCF) (KEGG:D08040)	P02545	LMNA	0.949996	Known
D-00296	DrugBank:DB05381|KEGG:D04444|KEGG:D04445|KEGG:D08040	Histamine (DrugBank:DB05381)|Histamine dihydrochloride (USAN) (KEGG:D04444)|Histamine phosphate (USP) (KEGG:D04445)|Histamine (DCF) (KEGG:D08040)	P25021	HRH2	0.88985	Known
D-00296	DrugBank:DB05381|KEGG:D04444|KEGG:D04445|KEGG:D08040	Histamine (DrugBank:DB05381)|Histamine dihydrochloride (USAN) (KEGG:D04444)|Histamine phosphate (USP) (KEGG:D04445)|Histamine (DCF) (KEGG:D08040)	Q96KQ7	EHMT2	0.261912	Known
D-00299	IUPHAR:1204|IUPHAR:1247|TTD:D04USC|TTD:D0EN0G	histamine (IUPHAR:1204)|[<sup>3</sup>H]histamine (IUPHAR:1247)|Ergotidine (TTD:D04USC)|Histamine Phosphate (TTD:D0EN0G)	P25100	ADRA1D	3.66195	1
D-00299	IUPHAR:1204|IUPHAR:1247|TTD:D04USC|TTD:D0EN0G	histamine (IUPHAR:1204)|[<sup>3</sup>H]histamine (IUPHAR:1247)|Ergotidine (TTD:D04USC)|Histamine Phosphate (TTD:D0EN0G)	Q9Y5N1	HRH3	3.56325	Known
D-00299	IUPHAR:1204|IUPHAR:1247|TTD:D04USC|TTD:D0EN0G	histamine (IUPHAR:1204)|[<sup>3</sup>H]histamine (IUPHAR:1247)|Ergotidine (TTD:D04USC)|Histamine Phosphate (TTD:D0EN0G)	P08913	ADRA2A	3.36257	2
D-00299	IUPHAR:1204|IUPHAR:1247|TTD:D04USC|TTD:D0EN0G	histamine (IUPHAR:1204)|[<sup>3</sup>H]histamine (IUPHAR:1247)|Ergotidine (TTD:D04USC)|Histamine Phosphate (TTD:D0EN0G)	P18089	ADRA2B	3.23781	3
D-00299	IUPHAR:1204|IUPHAR:1247|TTD:D04USC|TTD:D0EN0G	histamine (IUPHAR:1204)|[<sup>3</sup>H]histamine (IUPHAR:1247)|Ergotidine (TTD:D04USC)|Histamine Phosphate (TTD:D0EN0G)	P08173	CHRM4	3.18506	4
D-00299	IUPHAR:1204|IUPHAR:1247|TTD:D04USC|TTD:D0EN0G	histamine (IUPHAR:1204)|[<sup>3</sup>H]histamine (IUPHAR:1247)|Ergotidine (TTD:D04USC)|Histamine Phosphate (TTD:D0EN0G)	P14416	DRD2	2.98654	5
D-00299	IUPHAR:1204|IUPHAR:1247|TTD:D04USC|TTD:D0EN0G	histamine (IUPHAR:1204)|[<sup>3</sup>H]histamine (IUPHAR:1247)|Ergotidine (TTD:D04USC)|Histamine Phosphate (TTD:D0EN0G)	P46098	HTR3A	2.93334	6
D-00299	IUPHAR:1204|IUPHAR:1247|TTD:D04USC|TTD:D0EN0G	histamine (IUPHAR:1204)|[<sup>3</sup>H]histamine (IUPHAR:1247)|Ergotidine (TTD:D04USC)|Histamine Phosphate (TTD:D0EN0G)	P18825	ADRA2C	2.87508	7
D-00299	IUPHAR:1204|IUPHAR:1247|TTD:D04USC|TTD:D0EN0G	histamine (IUPHAR:1204)|[<sup>3</sup>H]histamine (IUPHAR:1247)|Ergotidine (TTD:D04USC)|Histamine Phosphate (TTD:D0EN0G)	P20309	CHRM3	2.86853	8
D-00299	IUPHAR:1204|IUPHAR:1247|TTD:D04USC|TTD:D0EN0G	histamine (IUPHAR:1204)|[<sup>3</sup>H]histamine (IUPHAR:1247)|Ergotidine (TTD:D04USC)|Histamine Phosphate (TTD:D0EN0G)	P08912	CHRM5	2.7424	9
D-00299	IUPHAR:1204|IUPHAR:1247|TTD:D04USC|TTD:D0EN0G	histamine (IUPHAR:1204)|[<sup>3</sup>H]histamine (IUPHAR:1247)|Ergotidine (TTD:D04USC)|Histamine Phosphate (TTD:D0EN0G)	P41595	HTR2B	2.58099	10
D-00299	IUPHAR:1204|IUPHAR:1247|TTD:D04USC|TTD:D0EN0G	histamine (IUPHAR:1204)|[<sup>3</sup>H]histamine (IUPHAR:1247)|Ergotidine (TTD:D04USC)|Histamine Phosphate (TTD:D0EN0G)	P21917	DRD4	2.53204	11
D-00299	IUPHAR:1204|IUPHAR:1247|TTD:D04USC|TTD:D0EN0G	histamine (IUPHAR:1204)|[<sup>3</sup>H]histamine (IUPHAR:1247)|Ergotidine (TTD:D04USC)|Histamine Phosphate (TTD:D0EN0G)	P28221	HTR1D	2.43965	12
D-00299	IUPHAR:1204|IUPHAR:1247|TTD:D04USC|TTD:D0EN0G	histamine (IUPHAR:1204)|[<sup>3</sup>H]histamine (IUPHAR:1247)|Ergotidine (TTD:D04USC)|Histamine Phosphate (TTD:D0EN0G)	P34969	HTR7	2.39587	13
D-00299	IUPHAR:1204|IUPHAR:1247|TTD:D04USC|TTD:D0EN0G	histamine (IUPHAR:1204)|[<sup>3</sup>H]histamine (IUPHAR:1247)|Ergotidine (TTD:D04USC)|Histamine Phosphate (TTD:D0EN0G)	P35462	DRD3	2.36829	14
D-00299	IUPHAR:1204|IUPHAR:1247|TTD:D04USC|TTD:D0EN0G	histamine (IUPHAR:1204)|[<sup>3</sup>H]histamine (IUPHAR:1247)|Ergotidine (TTD:D04USC)|Histamine Phosphate (TTD:D0EN0G)	Q9H3N8	HRH4	2.31359	Known
D-00299	IUPHAR:1204|IUPHAR:1247|TTD:D04USC|TTD:D0EN0G	histamine (IUPHAR:1204)|[<sup>3</sup>H]histamine (IUPHAR:1247)|Ergotidine (TTD:D04USC)|Histamine Phosphate (TTD:D0EN0G)	P07550	ADRB2	1.94139	15
D-00299	IUPHAR:1204|IUPHAR:1247|TTD:D04USC|TTD:D0EN0G	histamine (IUPHAR:1204)|[<sup>3</sup>H]histamine (IUPHAR:1247)|Ergotidine (TTD:D04USC)|Histamine Phosphate (TTD:D0EN0G)	P21728	DRD1	1.85258	16
D-00299	IUPHAR:1204|IUPHAR:1247|TTD:D04USC|TTD:D0EN0G	histamine (IUPHAR:1204)|[<sup>3</sup>H]histamine (IUPHAR:1247)|Ergotidine (TTD:D04USC)|Histamine Phosphate (TTD:D0EN0G)	P50406	HTR6	1.74961	17
D-00299	IUPHAR:1204|IUPHAR:1247|TTD:D04USC|TTD:D0EN0G	histamine (IUPHAR:1204)|[<sup>3</sup>H]histamine (IUPHAR:1247)|Ergotidine (TTD:D04USC)|Histamine Phosphate (TTD:D0EN0G)	P11229	CHRM1	1.72105	18
D-00299	IUPHAR:1204|IUPHAR:1247|TTD:D04USC|TTD:D0EN0G	histamine (IUPHAR:1204)|[<sup>3</sup>H]histamine (IUPHAR:1247)|Ergotidine (TTD:D04USC)|Histamine Phosphate (TTD:D0EN0G)	P08172	CHRM2	1.64817	19
D-00299	IUPHAR:1204|IUPHAR:1247|TTD:D04USC|TTD:D0EN0G	histamine (IUPHAR:1204)|[<sup>3</sup>H]histamine (IUPHAR:1247)|Ergotidine (TTD:D04USC)|Histamine Phosphate (TTD:D0EN0G)	Q96RJ0	TAAR1	1.62761	Known
D-00299	IUPHAR:1204|IUPHAR:1247|TTD:D04USC|TTD:D0EN0G	histamine (IUPHAR:1204)|[<sup>3</sup>H]histamine (IUPHAR:1247)|Ergotidine (TTD:D04USC)|Histamine Phosphate (TTD:D0EN0G)	P08908	HTR1A	1.53222	20
D-00299	IUPHAR:1204|IUPHAR:1247|TTD:D04USC|TTD:D0EN0G	histamine (IUPHAR:1204)|[<sup>3</sup>H]histamine (IUPHAR:1247)|Ergotidine (TTD:D04USC)|Histamine Phosphate (TTD:D0EN0G)	P35367	HRH1	1.03637	Known
D-00299	IUPHAR:1204|IUPHAR:1247|TTD:D04USC|TTD:D0EN0G	histamine (IUPHAR:1204)|[<sup>3</sup>H]histamine (IUPHAR:1247)|Ergotidine (TTD:D04USC)|Histamine Phosphate (TTD:D0EN0G)	P25021	HRH2	0.954713	Known
D-00310	TTD:D0G4ZL		P08913	ADRA2A	3.19454	1
D-00310	TTD:D0G4ZL		P49286	MTNR1B	2.86652	2
D-00310	TTD:D0G4ZL		Q9Y2I1	NISCH	2.68752	3
D-00310	TTD:D0G4ZL		P28845	HSD11B1	2.56565	4
D-00310	TTD:D0G4ZL		P41143	OPRD1	2.38553	5
D-00310	TTD:D0G4ZL		O94760	DDAH1	2.27849	6
D-00310	TTD:D0G4ZL		P23975	SLC6A2	2.17368	7
D-00310	TTD:D0G4ZL		O43570	CA12	2.13159	8
D-00310	TTD:D0G4ZL		P28221	HTR1D	2.08151	9
D-00310	TTD:D0G4ZL		P48039	MTNR1A	2.05853	10
D-00310	TTD:D0G4ZL		P34913	EPHX2	1.94146	11
D-00310	TTD:D0G4ZL		Q16790	CA9	1.91789	12
D-00310	TTD:D0G4ZL		P18825	ADRA2C	1.84245	13
D-00310	TTD:D0G4ZL		P10275	AR	1.82969	14
D-00310	TTD:D0G4ZL		P41145	OPRK1	1.79381	15
D-00310	TTD:D0G4ZL		P09960	LTA4H	1.77451	16
D-00310	TTD:D0G4ZL		P00918	CA2	1.77424	17
D-00310	TTD:D0G4ZL		P19838	NFKB1	1.73763	18
D-00310	TTD:D0G4ZL		P35348	ADRA1A	1.72797	19
D-00310	TTD:D0G4ZL		P30542	ADORA1	1.70091	20
D-00310	TTD:D0G4ZL		P29475	NOS1	0.981516	Known
D-00310	TTD:D0G4ZL		P35228	NOS2	0.903544	Known
D-00310	TTD:D0G4ZL		P29474	NOS3	0.249399	Known
D-00311	TTD:D0D7PK		P46092	CCR10	2.86531	1
D-00311	TTD:D0D7PK		Q9Y2I1	NISCH	2.62132	2
D-00311	TTD:D0D7PK		P45452	MMP13	2.4943	3
D-00311	TTD:D0D7PK		P28845	HSD11B1	2.29117	4
D-00311	TTD:D0D7PK		O94760	DDAH1	2.27849	5
D-00311	TTD:D0D7PK		P28221	HTR1D	2.22686	6
D-00311	TTD:D0D7PK		P03956	MMP1	2.16392	7
D-00311	TTD:D0D7PK		P06756	ITGAV	2.14379	8
D-00311	TTD:D0D7PK		P09958	FURIN	2.03385	9
D-00311	TTD:D0D7PK		P00918	CA2	1.99314	10
D-00311	TTD:D0D7PK		P09237	MMP7	1.95958	11
D-00311	TTD:D0D7PK		P10275	AR	1.91917	12
D-00311	TTD:D0D7PK		P30542	ADORA1	1.90152	13
D-00311	TTD:D0D7PK		P14416	DRD2	1.84392	14
D-00311	TTD:D0D7PK		P14780	MMP9	1.84266	15
D-00311	TTD:D0D7PK		P08913	ADRA2A	1.83122	16
D-00311	TTD:D0D7PK		P39900	MMP12	1.8252	17
D-00311	TTD:D0D7PK		P37268	FDFT1	1.80752	18
D-00311	TTD:D0D7PK		P07477	PRSS1	1.7937	19
D-00311	TTD:D0D7PK		Q9GZQ6	NPFFR1	1.75383	20
D-00311	TTD:D0D7PK		P35228	NOS2	1.23896	Known
D-00311	TTD:D0D7PK		P29475	NOS1	1.04202	Known
D-00311	TTD:D0D7PK		P29474	NOS3	0.714358	Known
D-00312	TTD:D02EOF		P10275	AR	3.46111	1
D-00312	TTD:D02EOF		Q96C86	DCPS	3.29212	2
D-00312	TTD:D02EOF		Q13639	HTR4	3.13207	3
D-00312	TTD:D02EOF		P30542	ADORA1	2.98572	4
D-00312	TTD:D02EOF		P28074	PSMB5	2.84525	5
D-00312	TTD:D02EOF		P45452	MMP13	2.66265	6
D-00312	TTD:D02EOF		Q9Y2I1	NISCH	2.62132	7
D-00312	TTD:D02EOF		P08913	ADRA2A	2.48498	8
D-00312	TTD:D02EOF		P23975	SLC6A2	2.44315	9
D-00312	TTD:D02EOF		P00918	CA2	2.35063	10
D-00312	TTD:D02EOF		P39900	MMP12	2.31209	11
D-00312	TTD:D02EOF		O94760	DDAH1	2.27849	12
D-00312	TTD:D02EOF		P28845	HSD11B1	2.21594	13
D-00312	TTD:D02EOF		P14780	MMP9	2.18746	14
D-00312	TTD:D02EOF		P03956	MMP1	2.16392	15
D-00312	TTD:D02EOF		P08253	MMP2	2.06836	16
D-00312	TTD:D02EOF		P08588	ADRB1	1.9755	17
D-00312	TTD:D02EOF		P09237	MMP7	1.95958	18
D-00312	TTD:D02EOF		P49286	MTNR1B	1.95874	19
D-00312	TTD:D02EOF		P41143	OPRD1	1.95234	20
D-00312	TTD:D02EOF		P35228	NOS2	1.25659	Known
D-00312	TTD:D02EOF		P29475	NOS1	1.14961	Known
D-00313	TTD:D03JXX		P30559	OXTR	3.20202	1
D-00313	TTD:D03JXX		P10144	GZMB	3.1549	2
D-00313	TTD:D03JXX		P30542	ADORA1	2.67197	3
D-00313	TTD:D03JXX		P49286	MTNR1B	2.28149	4
D-00313	TTD:D03JXX		O94760	DDAH1	2.27849	5
D-00313	TTD:D03JXX		P41143	OPRD1	2.20868	6
D-00313	TTD:D03JXX		Q13547	HDAC1	2.20395	7
D-00313	TTD:D03JXX		P14780	MMP9	2.18746	8
D-00313	TTD:D03JXX		P28845	HSD11B1	2.18241	9
D-00313	TTD:D03JXX		P35372	OPRM1	2.12946	10
D-00313	TTD:D03JXX		P39900	MMP12	2.07776	11
D-00313	TTD:D03JXX		P08253	MMP2	2.06836	12
D-00313	TTD:D03JXX		P22894	MMP8	2.05105	13
D-00313	TTD:D03JXX		P00918	CA2	2.04236	14
D-00313	TTD:D03JXX		P10275	AR	1.97771	15
D-00313	TTD:D03JXX		P09237	MMP7	1.95958	16
D-00313	TTD:D03JXX		P03956	MMP1	1.94516	17
D-00313	TTD:D03JXX		P45452	MMP13	1.8973	18
D-00313	TTD:D03JXX		P09960	LTA4H	1.8255	19
D-00313	TTD:D03JXX		Q04609	FOLH1	1.8242	20
D-00313	TTD:D03JXX		P35228	NOS2	1.66598	Known
D-00313	TTD:D03JXX		P29475	NOS1	1.63425	Known
D-00313	TTD:D03JXX		P29474	NOS3	0.656243	Known
D-00314	TTD:D08ALG		P00918	CA2	2.82946	1
D-00314	TTD:D08ALG		Q16790	CA9	2.40696	2
D-00314	TTD:D08ALG		Q9UBN7	HDAC6	2.39837	3
D-00314	TTD:D08ALG		Q9Y2I1	NISCH	2.37987	4
D-00314	TTD:D08ALG		P06756	ITGAV	2.29302	5
D-00314	TTD:D08ALG		O94760	DDAH1	2.27849	6
D-00314	TTD:D08ALG		Q9UBY5	LPAR3	2.18915	7
D-00314	TTD:D08ALG		P09958	FURIN	2.16661	8
D-00314	TTD:D08ALG		P08913	ADRA2A	1.93398	9
D-00314	TTD:D08ALG		Q8NER1	TRPV1	1.89072	10
D-00314	TTD:D08ALG		Q9GZQ6	NPFFR1	1.84453	11
D-00314	TTD:D08ALG		P35372	OPRM1	1.81749	12
D-00314	TTD:D08ALG		O43570	CA12	1.75091	13
D-00314	TTD:D08ALG		Q13547	HDAC1	1.73895	14
D-00314	TTD:D08ALG		O15379	HDAC3	1.67454	15
D-00314	TTD:D08ALG		P11137	MAP2	1.66026	16
D-00314	TTD:D08ALG		Q9Y5X5	NPFFR2	1.59325	17
D-00314	TTD:D08ALG		P34913	EPHX2	1.58219	18
D-00314	TTD:D08ALG		P23141	CES1	1.51433	19
D-00314	TTD:D08ALG		Q15661	TPSAB1	1.51325	20
D-00314	TTD:D08ALG		P29475	NOS1	1.04001	Known
D-00314	TTD:D08ALG		P35228	NOS2	0.464334	Known
D-00323	TTD:D06FHW		P10323	ACR	3.48149	1
D-00323	TTD:D06FHW		P05981	HPN	3.40875	2
D-00323	TTD:D06FHW		Q04756	HGFAC	2.60206	3
D-00323	TTD:D06FHW		P03952	KLKB1	2.06119	4
D-00323	TTD:D06FHW		P03951	F11	1.96456	5
D-00323	TTD:D06FHW		P09871	C1S	1.90271	6
D-00323	TTD:D06FHW		P00749	PLAU	1.86811	7
D-00323	TTD:D06FHW		Q15761	NPY5R	1.6699	8
D-00323	TTD:D06FHW		Q15661	TPSAB1	1.66401	9
D-00323	TTD:D06FHW		P19801	AOC1	1.52635	10
D-00323	TTD:D06FHW		P00740	F9	1.46598	11
D-00323	TTD:D06FHW		Q13639	HTR4	1.4462	12
D-00323	TTD:D06FHW		P32249	GPR183	1.39426	13
D-00323	TTD:D06FHW		P35030	PRSS3	1.38722	14
D-00323	TTD:D06FHW		P08709	F7	1.317	15
D-00323	TTD:D06FHW		P07477	PRSS1	1.1654	Known
D-00323	TTD:D06FHW		Q9Y5Y6	ST14	1.1454	16
D-00323	TTD:D06FHW		P06870	KLK1	0.98977	17
D-00323	TTD:D06FHW		P00734	F2	0.974744	18
D-00323	TTD:D06FHW		P04271	S100B	0.972726	19
D-00323	TTD:D06FHW		P04062	GBA	0.964117	20
D-00329	IUPHAR:4090|IUPHAR:4259|TTD:D0Z8IJ	[<sup>3</sup>H]muscimol (IUPHAR:4090)|muscimol (IUPHAR:4259)	P30536	TSPO	2.93318	1
D-00329	IUPHAR:4090|IUPHAR:4259|TTD:D0Z8IJ	[<sup>3</sup>H]muscimol (IUPHAR:4090)|muscimol (IUPHAR:4259)	P31644	GABRA5	2.54852	Known
D-00329	IUPHAR:4090|IUPHAR:4259|TTD:D0Z8IJ	[<sup>3</sup>H]muscimol (IUPHAR:4090)|muscimol (IUPHAR:4259)	P28472	GABRB3	2.52934	2
D-00329	IUPHAR:4090|IUPHAR:4259|TTD:D0Z8IJ	[<sup>3</sup>H]muscimol (IUPHAR:4090)|muscimol (IUPHAR:4259)	P48169	GABRA4	2.47443	3
D-00329	IUPHAR:4090|IUPHAR:4259|TTD:D0Z8IJ	[<sup>3</sup>H]muscimol (IUPHAR:4090)|muscimol (IUPHAR:4259)	Q16099	GRIK4	2.46764	4
D-00329	IUPHAR:4090|IUPHAR:4259|TTD:D0Z8IJ	[<sup>3</sup>H]muscimol (IUPHAR:4090)|muscimol (IUPHAR:4259)	Q9UBS5	GABBR1	2.37602	5
D-00329	IUPHAR:4090|IUPHAR:4259|TTD:D0Z8IJ	[<sup>3</sup>H]muscimol (IUPHAR:4090)|muscimol (IUPHAR:4259)	P0DMS8	ADORA3	2.19284	Known
D-00329	IUPHAR:4090|IUPHAR:4259|TTD:D0Z8IJ	[<sup>3</sup>H]muscimol (IUPHAR:4090)|muscimol (IUPHAR:4259)	Q16445	GABRA6	2.10703	Known
D-00329	IUPHAR:4090|IUPHAR:4259|TTD:D0Z8IJ	[<sup>3</sup>H]muscimol (IUPHAR:4090)|muscimol (IUPHAR:4259)	P47869	GABRA2	2.07893	Known
D-00329	IUPHAR:4090|IUPHAR:4259|TTD:D0Z8IJ	[<sup>3</sup>H]muscimol (IUPHAR:4090)|muscimol (IUPHAR:4259)	P25105	PTAFR	2.06934	6
D-00329	IUPHAR:4090|IUPHAR:4259|TTD:D0Z8IJ	[<sup>3</sup>H]muscimol (IUPHAR:4090)|muscimol (IUPHAR:4259)	P29275	ADORA2B	1.96522	7
D-00329	IUPHAR:4090|IUPHAR:4259|TTD:D0Z8IJ	[<sup>3</sup>H]muscimol (IUPHAR:4090)|muscimol (IUPHAR:4259)	P42262	GRIA2	1.80395	8
D-00329	IUPHAR:4090|IUPHAR:4259|TTD:D0Z8IJ	[<sup>3</sup>H]muscimol (IUPHAR:4090)|muscimol (IUPHAR:4259)	P14867	GABRA1	1.7898	Known
D-00329	IUPHAR:4090|IUPHAR:4259|TTD:D0Z8IJ	[<sup>3</sup>H]muscimol (IUPHAR:4090)|muscimol (IUPHAR:4259)	P34903	GABRA3	1.74312	Known
D-00329	IUPHAR:4090|IUPHAR:4259|TTD:D0Z8IJ	[<sup>3</sup>H]muscimol (IUPHAR:4090)|muscimol (IUPHAR:4259)	P42261	GRIA1	1.68528	9
D-00329	IUPHAR:4090|IUPHAR:4259|TTD:D0Z8IJ	[<sup>3</sup>H]muscimol (IUPHAR:4090)|muscimol (IUPHAR:4259)	P42263	GRIA3	1.65018	10
D-00329	IUPHAR:4090|IUPHAR:4259|TTD:D0Z8IJ	[<sup>3</sup>H]muscimol (IUPHAR:4090)|muscimol (IUPHAR:4259)	P29274	ADORA2A	1.61046	11
D-00329	IUPHAR:4090|IUPHAR:4259|TTD:D0Z8IJ	[<sup>3</sup>H]muscimol (IUPHAR:4090)|muscimol (IUPHAR:4259)	P39086	GRIK1	1.58317	12
D-00329	IUPHAR:4090|IUPHAR:4259|TTD:D0Z8IJ	[<sup>3</sup>H]muscimol (IUPHAR:4090)|muscimol (IUPHAR:4259)	P15121	AKR1B1	1.54124	13
D-00329	IUPHAR:4090|IUPHAR:4259|TTD:D0Z8IJ	[<sup>3</sup>H]muscimol (IUPHAR:4090)|muscimol (IUPHAR:4259)	P00747	PLG	1.418	14
D-00329	IUPHAR:4090|IUPHAR:4259|TTD:D0Z8IJ	[<sup>3</sup>H]muscimol (IUPHAR:4090)|muscimol (IUPHAR:4259)	P48058	GRIA4	1.39601	15
D-00329	IUPHAR:4090|IUPHAR:4259|TTD:D0Z8IJ	[<sup>3</sup>H]muscimol (IUPHAR:4090)|muscimol (IUPHAR:4259)	P30542	ADORA1	1.31784	16
D-00329	IUPHAR:4090|IUPHAR:4259|TTD:D0Z8IJ	[<sup>3</sup>H]muscimol (IUPHAR:4090)|muscimol (IUPHAR:4259)	O60885	BRD4	1.28776	17
D-00329	IUPHAR:4090|IUPHAR:4259|TTD:D0Z8IJ	[<sup>3</sup>H]muscimol (IUPHAR:4090)|muscimol (IUPHAR:4259)	A8MPY1	GABRR3	1.28691	Known
D-00329	IUPHAR:4090|IUPHAR:4259|TTD:D0Z8IJ	[<sup>3</sup>H]muscimol (IUPHAR:4090)|muscimol (IUPHAR:4259)	Q16478	GRIK5	1.20485	18
D-00329	IUPHAR:4090|IUPHAR:4259|TTD:D0Z8IJ	[<sup>3</sup>H]muscimol (IUPHAR:4090)|muscimol (IUPHAR:4259)	P30531	SLC6A1	1.1805	19
D-00329	IUPHAR:4090|IUPHAR:4259|TTD:D0Z8IJ	[<sup>3</sup>H]muscimol (IUPHAR:4090)|muscimol (IUPHAR:4259)	Q8NER1	TRPV1	1.17138	20
D-00329	IUPHAR:4090|IUPHAR:4259|TTD:D0Z8IJ	[<sup>3</sup>H]muscimol (IUPHAR:4090)|muscimol (IUPHAR:4259)	P28476	GABRR2	0.853872	Known
D-00329	IUPHAR:4090|IUPHAR:4259|TTD:D0Z8IJ	[<sup>3</sup>H]muscimol (IUPHAR:4090)|muscimol (IUPHAR:4259)	P24046	GABRR1	0.632875	Known
D-00330	DrugBank:DB12458	Muscimol (DrugBank:DB12458)	P14867	GABRA1	3.89586	1
D-00330	DrugBank:DB12458	Muscimol (DrugBank:DB12458)	P47869	GABRA2	3.65557	2
D-00330	DrugBank:DB12458	Muscimol (DrugBank:DB12458)	P34903	GABRA3	3.37369	3
D-00330	DrugBank:DB12458	Muscimol (DrugBank:DB12458)	P31644	GABRA5	3.08979	4
D-00330	DrugBank:DB12458	Muscimol (DrugBank:DB12458)	P28472	GABRB3	2.52934	5
D-00330	DrugBank:DB12458	Muscimol (DrugBank:DB12458)	Q9UBS5	GABBR1	2.37602	6
D-00330	DrugBank:DB12458	Muscimol (DrugBank:DB12458)	P29275	ADORA2B	2.22411	7
D-00330	DrugBank:DB12458	Muscimol (DrugBank:DB12458)	P0DMS8	ADORA3	1.92202	Known
D-00330	DrugBank:DB12458	Muscimol (DrugBank:DB12458)	Q9BXA5	SUCNR1	1.87169	8
D-00330	DrugBank:DB12458	Muscimol (DrugBank:DB12458)	Q96RI0	F2RL3	1.8332	9
D-00330	DrugBank:DB12458	Muscimol (DrugBank:DB12458)	P30542	ADORA1	1.79478	10
D-00330	DrugBank:DB12458	Muscimol (DrugBank:DB12458)	P42263	GRIA3	1.73671	11
D-00330	DrugBank:DB12458	Muscimol (DrugBank:DB12458)	P11509	CYP2A6	1.68489	12
D-00330	DrugBank:DB12458	Muscimol (DrugBank:DB12458)	Q99808	SLC29A1	1.6037	13
D-00330	DrugBank:DB12458	Muscimol (DrugBank:DB12458)	P42261	GRIA1	1.48356	14
D-00330	DrugBank:DB12458	Muscimol (DrugBank:DB12458)	P14416	DRD2	1.46681	15
D-00330	DrugBank:DB12458	Muscimol (DrugBank:DB12458)	Q16445	GABRA6	1.45433	16
D-00330	DrugBank:DB12458	Muscimol (DrugBank:DB12458)	Q9HCX4	TRPC7	1.45136	17
D-00330	DrugBank:DB12458	Muscimol (DrugBank:DB12458)	Q9GZV3	SLC5A7	1.34249	18
D-00330	DrugBank:DB12458	Muscimol (DrugBank:DB12458)	A8MPY1	GABRR3	1.28691	19
D-00330	DrugBank:DB12458	Muscimol (DrugBank:DB12458)	P05181	CYP2E1	1.23428	20
D-00330	DrugBank:DB12458	Muscimol (DrugBank:DB12458)	P28476	GABRR2	0.853872	Known
D-00330	DrugBank:DB12458	Muscimol (DrugBank:DB12458)	P24046	GABRR1	0.632875	Known
D-00331	IUPHAR:8859	&beta;-Cyano-L-alanine (IUPHAR:8859)	P83916	CBX1	2.54883	1
D-00331	IUPHAR:8859	&beta;-Cyano-L-alanine (IUPHAR:8859)	P41143	OPRD1	2.40441	2
D-00331	IUPHAR:8859	&beta;-Cyano-L-alanine (IUPHAR:8859)	O94760	DDAH1	2.27849	3
D-00331	IUPHAR:8859	&beta;-Cyano-L-alanine (IUPHAR:8859)	P35372	OPRM1	1.96085	4
D-00331	IUPHAR:8859	&beta;-Cyano-L-alanine (IUPHAR:8859)	P10275	AR	1.85749	5
D-00331	IUPHAR:8859	&beta;-Cyano-L-alanine (IUPHAR:8859)	P14416	DRD2	1.76249	6
D-00331	IUPHAR:8859	&beta;-Cyano-L-alanine (IUPHAR:8859)	P09960	LTA4H	1.68528	7
D-00331	IUPHAR:8859	&beta;-Cyano-L-alanine (IUPHAR:8859)	P32929	CTH	1.58483	Known
D-00331	IUPHAR:8859	&beta;-Cyano-L-alanine (IUPHAR:8859)	P27487	DPP4	1.43644	8
D-00331	IUPHAR:8859	&beta;-Cyano-L-alanine (IUPHAR:8859)	P12821	ACE	1.37565	9
D-00331	IUPHAR:8859	&beta;-Cyano-L-alanine (IUPHAR:8859)	Q02127	DHODH	1.27174	10
D-00331	IUPHAR:8859	&beta;-Cyano-L-alanine (IUPHAR:8859)	O00222	GRM8	1.24901	11
D-00331	IUPHAR:8859	&beta;-Cyano-L-alanine (IUPHAR:8859)	Q04760	GLO1	1.23188	12
D-00331	IUPHAR:8859	&beta;-Cyano-L-alanine (IUPHAR:8859)	Q13002	GRIK2	1.09885	13
D-00331	IUPHAR:8859	&beta;-Cyano-L-alanine (IUPHAR:8859)	Q15722	LTB4R	1.09084	14
D-00331	IUPHAR:8859	&beta;-Cyano-L-alanine (IUPHAR:8859)	Q9Y2Q3	GSTK1	1.08677	15
D-00331	IUPHAR:8859	&beta;-Cyano-L-alanine (IUPHAR:8859)	P39086	GRIK1	1.07403	16
D-00331	IUPHAR:8859	&beta;-Cyano-L-alanine (IUPHAR:8859)	O43570	CA12	1.03409	17
D-00331	IUPHAR:8859	&beta;-Cyano-L-alanine (IUPHAR:8859)	P25774	CTSS	1.01396	18
D-00331	IUPHAR:8859	&beta;-Cyano-L-alanine (IUPHAR:8859)	Q04609	FOLH1	0.986659	19
D-00331	IUPHAR:8859	&beta;-Cyano-L-alanine (IUPHAR:8859)	Q9Y5Y4	PTGDR2	0.952926	20
D-00341	TTD:D0I3ZP		Q9Y5Z0	BACE2	3.55768	1
D-00341	TTD:D0I3ZP		P35270	SPR	2.93971	2
D-00341	TTD:D0I3ZP		P00918	CA2	2.81776	3
D-00341	TTD:D0I3ZP		P34913	EPHX2	2.72282	4
D-00341	TTD:D0I3ZP		P00797	REN	2.6463	5
D-00341	TTD:D0I3ZP		P56817	BACE1	2.60934	6
D-00341	TTD:D0I3ZP		Q15722	LTB4R	2.49952	7
D-00341	TTD:D0I3ZP		Q16581	C3AR1	2.46959	8
D-00341	TTD:D0I3ZP		Q9Y5N1	HRH3	2.40559	9
D-00341	TTD:D0I3ZP		Q9Y2I1	NISCH	2.31131	10
D-00341	TTD:D0I3ZP		O94760	DDAH1	2.27849	11
D-00341	TTD:D0I3ZP		Q9UBY5	LPAR3	2.18915	12
D-00341	TTD:D0I3ZP		P06756	ITGAV	2.12247	13
D-00341	TTD:D0I3ZP		P41143	OPRD1	2.06907	14
D-00341	TTD:D0I3ZP		P08913	ADRA2A	1.91	15
D-00341	TTD:D0I3ZP		Q16790	CA9	1.83279	16
D-00341	TTD:D0I3ZP		P09958	FURIN	1.82118	17
D-00341	TTD:D0I3ZP		P11137	MAP2	1.66026	18
D-00341	TTD:D0I3ZP		P07477	PRSS1	1.65073	19
D-00341	TTD:D0I3ZP		Q07869	PPARA	1.62532	20
D-00341	TTD:D0I3ZP		P35228	NOS2	1.04317	Known
D-00341	TTD:D0I3ZP		P29475	NOS1	0.777646	Known
D-00341	TTD:D0I3ZP		P29474	NOS3	0.5865	Known
D-00359	DrugBank:DB13238|KEGG:D07371	Tuaminoheptane (DrugBank:DB13238)|Tuaminoheptane (INN) (KEGG:D07371)	P14416	DRD2	4.44317	1
D-00359	DrugBank:DB13238|KEGG:D07371	Tuaminoheptane (DrugBank:DB13238)|Tuaminoheptane (INN) (KEGG:D07371)	P01213	PDYN	3.14874	2
D-00359	DrugBank:DB13238|KEGG:D07371	Tuaminoheptane (DrugBank:DB13238)|Tuaminoheptane (INN) (KEGG:D07371)	Q96LB1	MRGPRX2	2.90858	3
D-00359	DrugBank:DB13238|KEGG:D07371	Tuaminoheptane (DrugBank:DB13238)|Tuaminoheptane (INN) (KEGG:D07371)	P34913	EPHX2	2.50213	4
D-00359	DrugBank:DB13238|KEGG:D07371	Tuaminoheptane (DrugBank:DB13238)|Tuaminoheptane (INN) (KEGG:D07371)	P41146	OPRL1	2.4334	5
D-00359	DrugBank:DB13238|KEGG:D07371	Tuaminoheptane (DrugBank:DB13238)|Tuaminoheptane (INN) (KEGG:D07371)	Q01959	SLC6A3	2.38786	6
D-00359	DrugBank:DB13238|KEGG:D07371	Tuaminoheptane (DrugBank:DB13238)|Tuaminoheptane (INN) (KEGG:D07371)	Q5TC84	OGFRL1	1.84712	7
D-00359	DrugBank:DB13238|KEGG:D07371	Tuaminoheptane (DrugBank:DB13238)|Tuaminoheptane (INN) (KEGG:D07371)	P04278	SHBG	1.83734	8
D-00359	DrugBank:DB13238|KEGG:D07371	Tuaminoheptane (DrugBank:DB13238)|Tuaminoheptane (INN) (KEGG:D07371)	P42785	PRCP	1.83457	9
D-00359	DrugBank:DB13238|KEGG:D07371	Tuaminoheptane (DrugBank:DB13238)|Tuaminoheptane (INN) (KEGG:D07371)	Q8NER1	TRPV1	1.79017	10
D-00359	DrugBank:DB13238|KEGG:D07371	Tuaminoheptane (DrugBank:DB13238)|Tuaminoheptane (INN) (KEGG:D07371)	P35372	OPRM1	1.75189	Known
D-00359	DrugBank:DB13238|KEGG:D07371	Tuaminoheptane (DrugBank:DB13238)|Tuaminoheptane (INN) (KEGG:D07371)	Q99720	SIGMAR1	1.72146	11
D-00359	DrugBank:DB13238|KEGG:D07371	Tuaminoheptane (DrugBank:DB13238)|Tuaminoheptane (INN) (KEGG:D07371)	Q14957	GRIN2C	1.61455	12
D-00359	DrugBank:DB13238|KEGG:D07371	Tuaminoheptane (DrugBank:DB13238)|Tuaminoheptane (INN) (KEGG:D07371)	O00519	FAAH	1.54462	13
D-00359	DrugBank:DB13238|KEGG:D07371	Tuaminoheptane (DrugBank:DB13238)|Tuaminoheptane (INN) (KEGG:D07371)	P09960	LTA4H	1.44905	14
D-00359	DrugBank:DB13238|KEGG:D07371	Tuaminoheptane (DrugBank:DB13238)|Tuaminoheptane (INN) (KEGG:D07371)	P35462	DRD3	1.44199	15
D-00359	DrugBank:DB13238|KEGG:D07371	Tuaminoheptane (DrugBank:DB13238)|Tuaminoheptane (INN) (KEGG:D07371)	P30542	ADORA1	1.43822	16
D-00359	DrugBank:DB13238|KEGG:D07371	Tuaminoheptane (DrugBank:DB13238)|Tuaminoheptane (INN) (KEGG:D07371)	P41143	OPRD1	1.18371	17
D-00359	DrugBank:DB13238|KEGG:D07371	Tuaminoheptane (DrugBank:DB13238)|Tuaminoheptane (INN) (KEGG:D07371)	P29274	ADORA2A	1.1713	18
D-00359	DrugBank:DB13238|KEGG:D07371	Tuaminoheptane (DrugBank:DB13238)|Tuaminoheptane (INN) (KEGG:D07371)	Q9UBY5	LPAR3	1.17091	19
D-00359	DrugBank:DB13238|KEGG:D07371	Tuaminoheptane (DrugBank:DB13238)|Tuaminoheptane (INN) (KEGG:D07371)	P41597	CCR2	1.15631	20
D-00361	DrugBank:DB01677|KEGG:D02308|TTD:D03GOO	Fumaric Acid (DrugBank:DB01677)|Fumaric acid (NF) (KEGG:D02308)|Fumaric acid (TTD:D03GOO)	Q8TEK3	DOT1L	3.11521	1
D-00361	DrugBank:DB01677|KEGG:D02308|TTD:D03GOO	Fumaric Acid (DrugBank:DB01677)|Fumaric acid (NF) (KEGG:D02308)|Fumaric acid (TTD:D03GOO)	P19793	RXRA	2.94866	2
D-00361	DrugBank:DB01677|KEGG:D02308|TTD:D03GOO	Fumaric Acid (DrugBank:DB01677)|Fumaric acid (NF) (KEGG:D02308)|Fumaric acid (TTD:D03GOO)	P28702	RXRB	2.86595	3
D-00361	DrugBank:DB01677|KEGG:D02308|TTD:D03GOO	Fumaric Acid (DrugBank:DB01677)|Fumaric acid (NF) (KEGG:D02308)|Fumaric acid (TTD:D03GOO)	Q15910	EZH2	2.86055	4
D-00361	DrugBank:DB01677|KEGG:D02308|TTD:D03GOO	Fumaric Acid (DrugBank:DB01677)|Fumaric acid (NF) (KEGG:D02308)|Fumaric acid (TTD:D03GOO)	P48443	RXRG	2.81578	5
D-00361	DrugBank:DB01677|KEGG:D02308|TTD:D03GOO	Fumaric Acid (DrugBank:DB01677)|Fumaric acid (NF) (KEGG:D02308)|Fumaric acid (TTD:D03GOO)	Q15722	LTB4R	2.51104	6
D-00361	DrugBank:DB01677|KEGG:D02308|TTD:D03GOO	Fumaric Acid (DrugBank:DB01677)|Fumaric acid (NF) (KEGG:D02308)|Fumaric acid (TTD:D03GOO)	Q01469	FABP5	2.49299	7
D-00361	DrugBank:DB01677|KEGG:D02308|TTD:D03GOO	Fumaric Acid (DrugBank:DB01677)|Fumaric acid (NF) (KEGG:D02308)|Fumaric acid (TTD:D03GOO)	Q86X55	CARM1	2.35767	8
D-00361	DrugBank:DB01677|KEGG:D02308|TTD:D03GOO	Fumaric Acid (DrugBank:DB01677)|Fumaric acid (NF) (KEGG:D02308)|Fumaric acid (TTD:D03GOO)	Q9H9B1	EHMT1	2.1833	9
D-00361	DrugBank:DB01677|KEGG:D02308|TTD:D03GOO	Fumaric Acid (DrugBank:DB01677)|Fumaric acid (NF) (KEGG:D02308)|Fumaric acid (TTD:D03GOO)	P43115	PTGER3	2.07646	10
D-00361	DrugBank:DB01677|KEGG:D02308|TTD:D03GOO	Fumaric Acid (DrugBank:DB01677)|Fumaric acid (NF) (KEGG:D02308)|Fumaric acid (TTD:D03GOO)	P13631	RARG	2.01634	11
D-00361	DrugBank:DB01677|KEGG:D02308|TTD:D03GOO	Fumaric Acid (DrugBank:DB01677)|Fumaric acid (NF) (KEGG:D02308)|Fumaric acid (TTD:D03GOO)	P10826	RARB	1.97001	12
D-00361	DrugBank:DB01677|KEGG:D02308|TTD:D03GOO	Fumaric Acid (DrugBank:DB01677)|Fumaric acid (NF) (KEGG:D02308)|Fumaric acid (TTD:D03GOO)	P31213	SRD5A2	1.94566	13
D-00361	DrugBank:DB01677|KEGG:D02308|TTD:D03GOO	Fumaric Acid (DrugBank:DB01677)|Fumaric acid (NF) (KEGG:D02308)|Fumaric acid (TTD:D03GOO)	P50579	METAP2	1.90367	14
D-00361	DrugBank:DB01677|KEGG:D02308|TTD:D03GOO	Fumaric Acid (DrugBank:DB01677)|Fumaric acid (NF) (KEGG:D02308)|Fumaric acid (TTD:D03GOO)	P07148	FABP1	1.87953	15
D-00361	DrugBank:DB01677|KEGG:D02308|TTD:D03GOO	Fumaric Acid (DrugBank:DB01677)|Fumaric acid (NF) (KEGG:D02308)|Fumaric acid (TTD:D03GOO)	Q9NRG4	SMYD2	1.85225	16
D-00361	DrugBank:DB01677|KEGG:D02308|TTD:D03GOO	Fumaric Acid (DrugBank:DB01677)|Fumaric acid (NF) (KEGG:D02308)|Fumaric acid (TTD:D03GOO)	Q99873	PRMT1	1.81602	17
D-00361	DrugBank:DB01677|KEGG:D02308|TTD:D03GOO	Fumaric Acid (DrugBank:DB01677)|Fumaric acid (NF) (KEGG:D02308)|Fumaric acid (TTD:D03GOO)	P10276	RARA	1.52381	18
D-00361	DrugBank:DB01677|KEGG:D02308|TTD:D03GOO	Fumaric Acid (DrugBank:DB01677)|Fumaric acid (NF) (KEGG:D02308)|Fumaric acid (TTD:D03GOO)	P34913	EPHX2	1.45696	19
D-00361	DrugBank:DB01677|KEGG:D02308|TTD:D03GOO	Fumaric Acid (DrugBank:DB01677)|Fumaric acid (NF) (KEGG:D02308)|Fumaric acid (TTD:D03GOO)	P22303	ACHE	1.39376	20
D-00361	DrugBank:DB01677|KEGG:D02308|TTD:D03GOO	Fumaric Acid (DrugBank:DB01677)|Fumaric acid (NF) (KEGG:D02308)|Fumaric acid (TTD:D03GOO)	O95050	INMT	0.849485	Known
D-00371	IUPHAR:4066|TTD:D08TAN	(+)-HA966 (IUPHAR:4066)|(+)-HA966 (TTD:D08TAN)	P29466	CASP1	3.22034	1
D-00371	IUPHAR:4066|TTD:D08TAN	(+)-HA966 (IUPHAR:4066)|(+)-HA966 (TTD:D08TAN)	Q04760	GLO1	1.85177	2
D-00371	IUPHAR:4066|TTD:D08TAN	(+)-HA966 (IUPHAR:4066)|(+)-HA966 (TTD:D08TAN)	P33527	ABCC1	1.75132	3
D-00371	IUPHAR:4066|TTD:D08TAN	(+)-HA966 (IUPHAR:4066)|(+)-HA966 (TTD:D08TAN)	P12821	ACE	1.71601	4
D-00371	IUPHAR:4066|TTD:D08TAN	(+)-HA966 (IUPHAR:4066)|(+)-HA966 (TTD:D08TAN)	P14416	DRD2	1.67313	5
D-00371	IUPHAR:4066|TTD:D08TAN	(+)-HA966 (IUPHAR:4066)|(+)-HA966 (TTD:D08TAN)	P00918	CA2	1.543	6
D-00371	IUPHAR:4066|TTD:D08TAN	(+)-HA966 (IUPHAR:4066)|(+)-HA966 (TTD:D08TAN)	P07550	ADRB2	1.48077	7
D-00371	IUPHAR:4066|TTD:D08TAN	(+)-HA966 (IUPHAR:4066)|(+)-HA966 (TTD:D08TAN)	Q99714	HSD17B10	1.41249	8
D-00371	IUPHAR:4066|TTD:D08TAN	(+)-HA966 (IUPHAR:4066)|(+)-HA966 (TTD:D08TAN)	Q9NY33	DPP3	1.39416	9
D-00371	IUPHAR:4066|TTD:D08TAN	(+)-HA966 (IUPHAR:4066)|(+)-HA966 (TTD:D08TAN)	P18089	ADRA2B	1.3637	10
D-00371	IUPHAR:4066|TTD:D08TAN	(+)-HA966 (IUPHAR:4066)|(+)-HA966 (TTD:D08TAN)	Q16665	HIF1A	1.3532	11
D-00371	IUPHAR:4066|TTD:D08TAN	(+)-HA966 (IUPHAR:4066)|(+)-HA966 (TTD:D08TAN)	P11309	PIM1	1.35313	12
D-00371	IUPHAR:4066|TTD:D08TAN	(+)-HA966 (IUPHAR:4066)|(+)-HA966 (TTD:D08TAN)	P21728	DRD1	1.28848	13
D-00371	IUPHAR:4066|TTD:D08TAN	(+)-HA966 (IUPHAR:4066)|(+)-HA966 (TTD:D08TAN)	P16050	ALOX15	1.25513	14
D-00371	IUPHAR:4066|TTD:D08TAN	(+)-HA966 (IUPHAR:4066)|(+)-HA966 (TTD:D08TAN)	P39748	FEN1	1.21507	15
D-00371	IUPHAR:4066|TTD:D08TAN	(+)-HA966 (IUPHAR:4066)|(+)-HA966 (TTD:D08TAN)	P05121	SERPINE1	1.08999	16
D-00371	IUPHAR:4066|TTD:D08TAN	(+)-HA966 (IUPHAR:4066)|(+)-HA966 (TTD:D08TAN)	P10828	THRB	1.06566	17
D-00371	IUPHAR:4066|TTD:D08TAN	(+)-HA966 (IUPHAR:4066)|(+)-HA966 (TTD:D08TAN)	P09917	ALOX5	1.04933	18
D-00371	IUPHAR:4066|TTD:D08TAN	(+)-HA966 (IUPHAR:4066)|(+)-HA966 (TTD:D08TAN)	Q16539	MAPK14	1.04489	19
D-00371	IUPHAR:4066|TTD:D08TAN	(+)-HA966 (IUPHAR:4066)|(+)-HA966 (TTD:D08TAN)	P83916	CBX1	1.03992	20
D-00371	IUPHAR:4066|TTD:D08TAN	(+)-HA966 (IUPHAR:4066)|(+)-HA966 (TTD:D08TAN)	P27695	APEX1	0.4125	Known
D-00374	TTD:D0O9II		P56817	BACE1	2.82722	1
D-00374	TTD:D0O9II		Q9Y5Z0	BACE2	2.82327	2
D-00374	TTD:D0O9II		P00918	CA2	2.5941	3
D-00374	TTD:D0O9II		Q15722	LTB4R	2.49952	4
D-00374	TTD:D0O9II		Q9Y5N1	HRH3	2.37291	5
D-00374	TTD:D0O9II		Q9Y2I1	NISCH	2.31367	6
D-00374	TTD:D0O9II		O94760	DDAH1	2.27849	7
D-00374	TTD:D0O9II		P34913	EPHX2	2.20943	8
D-00374	TTD:D0O9II		Q9UBY5	LPAR3	2.18915	9
D-00374	TTD:D0O9II		P06756	ITGAV	1.9331	10
D-00374	TTD:D0O9II		P00797	REN	1.89782	11
D-00374	TTD:D0O9II		P09958	FURIN	1.79604	12
D-00374	TTD:D0O9II		P18089	ADRA2B	1.79349	13
D-00374	TTD:D0O9II		P18825	ADRA2C	1.7459	14
D-00374	TTD:D0O9II		Q07869	PPARA	1.73159	15
D-00374	TTD:D0O9II		Q16790	CA9	1.71128	16
D-00374	TTD:D0O9II		P11137	MAP2	1.66026	17
D-00374	TTD:D0O9II		P08913	ADRA2A	1.53701	18
D-00374	TTD:D0O9II		O00519	FAAH	1.53624	19
D-00374	TTD:D0O9II		P41143	OPRD1	1.52503	20
D-00374	TTD:D0O9II		P35228	NOS2	1.03099	Known
D-00374	TTD:D0O9II		P29475	NOS1	1.02744	Known
D-00374	TTD:D0O9II		P29474	NOS3	0.635081	Known
D-00375	DrugBank:DB03260|TTD:D09JPC	1,6-Diaminohexane (DrugBank:DB03260)	O75493	CA11	3.24413	1
D-00375	DrugBank:DB03260|TTD:D09JPC	1,6-Diaminohexane (DrugBank:DB03260)	O75608	LYPLA1	2.62465	2
D-00375	DrugBank:DB03260|TTD:D09JPC	1,6-Diaminohexane (DrugBank:DB03260)	P00918	CA2	2.49204	3
D-00375	DrugBank:DB03260|TTD:D09JPC	1,6-Diaminohexane (DrugBank:DB03260)	Q9H4A4	RNPEP	2.32915	4
D-00375	DrugBank:DB03260|TTD:D09JPC	1,6-Diaminohexane (DrugBank:DB03260)	O43570	CA12	2.24179	Known
D-00375	DrugBank:DB03260|TTD:D09JPC	1,6-Diaminohexane (DrugBank:DB03260)	P61073	CXCR4	2.19336	5
D-00375	DrugBank:DB03260|TTD:D09JPC	1,6-Diaminohexane (DrugBank:DB03260)	P22748	CA4	2.14539	Known
D-00375	DrugBank:DB03260|TTD:D09JPC	1,6-Diaminohexane (DrugBank:DB03260)	O95372	LYPLA2	2.13198	6
D-00375	DrugBank:DB03260|TTD:D09JPC	1,6-Diaminohexane (DrugBank:DB03260)	Q9Y5N1	HRH3	2.10367	7
D-00375	DrugBank:DB03260|TTD:D09JPC	1,6-Diaminohexane (DrugBank:DB03260)	P34913	EPHX2	2.09888	8
D-00375	DrugBank:DB03260|TTD:D09JPC	1,6-Diaminohexane (DrugBank:DB03260)	Q92731	ESR2	2.0861	9
D-00375	DrugBank:DB03260|TTD:D09JPC	1,6-Diaminohexane (DrugBank:DB03260)	P14324	FDPS	2.0586	10
D-00375	DrugBank:DB03260|TTD:D09JPC	1,6-Diaminohexane (DrugBank:DB03260)	P35354	PTGS2	2.00816	11
D-00375	DrugBank:DB03260|TTD:D09JPC	1,6-Diaminohexane (DrugBank:DB03260)	P09960	LTA4H	1.91436	12
D-00375	DrugBank:DB03260|TTD:D09JPC	1,6-Diaminohexane (DrugBank:DB03260)	P15121	AKR1B1	1.67005	13
D-00375	DrugBank:DB03260|TTD:D09JPC	1,6-Diaminohexane (DrugBank:DB03260)	Q16678	CYP1B1	1.65212	14
D-00375	DrugBank:DB03260|TTD:D09JPC	1,6-Diaminohexane (DrugBank:DB03260)	Q16790	CA9	1.63754	Known
D-00375	DrugBank:DB03260|TTD:D09JPC	1,6-Diaminohexane (DrugBank:DB03260)	Q8N1Q1	CA13	1.51991	15
D-00375	DrugBank:DB03260|TTD:D09JPC	1,6-Diaminohexane (DrugBank:DB03260)	P00915	CA1	1.49537	16
D-00375	DrugBank:DB03260|TTD:D09JPC	1,6-Diaminohexane (DrugBank:DB03260)	Q9NY33	DPP3	1.44851	17
D-00375	DrugBank:DB03260|TTD:D09JPC	1,6-Diaminohexane (DrugBank:DB03260)	Q99436	PSMB7	1.42174	18
D-00375	DrugBank:DB03260|TTD:D09JPC	1,6-Diaminohexane (DrugBank:DB03260)	P12821	ACE	1.40009	19
D-00375	DrugBank:DB03260|TTD:D09JPC	1,6-Diaminohexane (DrugBank:DB03260)	P51449	RORC	1.39253	20
D-00375	DrugBank:DB03260|TTD:D09JPC	1,6-Diaminohexane (DrugBank:DB03260)	P35218	CA5A	1.39015	Known
D-00375	DrugBank:DB03260|TTD:D09JPC	1,6-Diaminohexane (DrugBank:DB03260)	P43166	CA7	1.19803	Known
D-00375	DrugBank:DB03260|TTD:D09JPC	1,6-Diaminohexane (DrugBank:DB03260)	Q9ULX7	CA14	1.14009	Known
D-00375	DrugBank:DB03260|TTD:D09JPC	1,6-Diaminohexane (DrugBank:DB03260)	Q9Y2D0	CA5B	1.10668	Known
D-00375	DrugBank:DB03260|TTD:D09JPC	1,6-Diaminohexane (DrugBank:DB03260)	P07451	CA3	1.09731	Known
D-00375	DrugBank:DB03260|TTD:D09JPC	1,6-Diaminohexane (DrugBank:DB03260)	P23280	CA6	1.03215	Known
D-00394	DrugBank:DB04532	Indole (DrugBank:DB04532)	O75608	LYPLA1	3.77745	1
D-00394	DrugBank:DB04532	Indole (DrugBank:DB04532)	O75493	CA11	3.24413	2
D-00394	DrugBank:DB04532	Indole (DrugBank:DB04532)	O95372	LYPLA2	3.06839	3
D-00394	DrugBank:DB04532	Indole (DrugBank:DB04532)	Q92731	ESR2	1.93348	4
D-00394	DrugBank:DB04532	Indole (DrugBank:DB04532)	Q16678	CYP1B1	1.8823	5
D-00394	DrugBank:DB04532	Indole (DrugBank:DB04532)	P43166	CA7	1.83494	6
D-00394	DrugBank:DB04532	Indole (DrugBank:DB04532)	P00915	CA1	1.81728	7
D-00394	DrugBank:DB04532	Indole (DrugBank:DB04532)	O43570	CA12	1.72449	8
D-00394	DrugBank:DB04532	Indole (DrugBank:DB04532)	P00918	CA2	1.69775	9
D-00394	DrugBank:DB04532	Indole (DrugBank:DB04532)	P35218	CA5A	1.64468	10
D-00394	DrugBank:DB04532	Indole (DrugBank:DB04532)	Q9Y2D0	CA5B	1.54707	11
D-00394	DrugBank:DB04532	Indole (DrugBank:DB04532)	Q16790	CA9	1.48978	12
D-00394	DrugBank:DB04532	Indole (DrugBank:DB04532)	Q9ULX7	CA14	1.45268	13
D-00394	DrugBank:DB04532	Indole (DrugBank:DB04532)	P21917	DRD4	1.43022	14
D-00394	DrugBank:DB04532	Indole (DrugBank:DB04532)	P49286	MTNR1B	1.2548	15
D-00394	DrugBank:DB04532	Indole (DrugBank:DB04532)	P31645	SLC6A4	1.24308	16
D-00394	DrugBank:DB04532	Indole (DrugBank:DB04532)	P35462	DRD3	1.22293	17
D-00394	DrugBank:DB04532	Indole (DrugBank:DB04532)	P03372	ESR1	1.22035	18
D-00394	DrugBank:DB04532	Indole (DrugBank:DB04532)	Q9NY33	DPP3	1.21686	19
D-00394	DrugBank:DB04532	Indole (DrugBank:DB04532)	P23975	SLC6A2	1.20793	20
D-00394	DrugBank:DB04532	Indole (DrugBank:DB04532)	P23280	CA6	1.13464	Known
D-00394	DrugBank:DB04532	Indole (DrugBank:DB04532)	P22748	CA4	1.04941	Known
D-00422	DrugBank:DB04018|TTD:D0J1LO	S-Isopropyl-Isothiourea (DrugBank:DB04018)	O94760	DDAH1	3.03024	1
D-00422	DrugBank:DB04018|TTD:D0J1LO	S-Isopropyl-Isothiourea (DrugBank:DB04018)	Q9Y5N1	HRH3	2.56142	2
D-00422	DrugBank:DB04018|TTD:D0J1LO	S-Isopropyl-Isothiourea (DrugBank:DB04018)	Q9H3N8	HRH4	2.51157	3
D-00422	DrugBank:DB04018|TTD:D0J1LO	S-Isopropyl-Isothiourea (DrugBank:DB04018)	P61073	CXCR4	2.4854	4
D-00422	DrugBank:DB04018|TTD:D0J1LO	S-Isopropyl-Isothiourea (DrugBank:DB04018)	P29475	NOS1	2.34184	Known
D-00422	DrugBank:DB04018|TTD:D0J1LO	S-Isopropyl-Isothiourea (DrugBank:DB04018)	P49281	SLC11A2	2.09691	5
D-00422	DrugBank:DB04018|TTD:D0J1LO	S-Isopropyl-Isothiourea (DrugBank:DB04018)	Q13936	CACNA1C	1.70277	6
D-00422	DrugBank:DB04018|TTD:D0J1LO	S-Isopropyl-Isothiourea (DrugBank:DB04018)	P11137	MAP2	1.66026	7
D-00422	DrugBank:DB04018|TTD:D0J1LO	S-Isopropyl-Isothiourea (DrugBank:DB04018)	P43088	PTGFR	1.5768	8
D-00422	DrugBank:DB04018|TTD:D0J1LO	S-Isopropyl-Isothiourea (DrugBank:DB04018)	P00918	CA2	1.5656	9
D-00422	DrugBank:DB04018|TTD:D0J1LO	S-Isopropyl-Isothiourea (DrugBank:DB04018)	P00742	F10	1.56184	10
D-00422	DrugBank:DB04018|TTD:D0J1LO	S-Isopropyl-Isothiourea (DrugBank:DB04018)	P08588	ADRB1	1.48435	11
D-00422	DrugBank:DB04018|TTD:D0J1LO	S-Isopropyl-Isothiourea (DrugBank:DB04018)	Q96RJ0	TAAR1	1.45125	12
D-00422	DrugBank:DB04018|TTD:D0J1LO	S-Isopropyl-Isothiourea (DrugBank:DB04018)	P35228	NOS2	1.42761	13
D-00422	DrugBank:DB04018|TTD:D0J1LO	S-Isopropyl-Isothiourea (DrugBank:DB04018)	P07550	ADRB2	1.42264	14
D-00422	DrugBank:DB04018|TTD:D0J1LO	S-Isopropyl-Isothiourea (DrugBank:DB04018)	P00797	REN	1.34825	15
D-00422	DrugBank:DB04018|TTD:D0J1LO	S-Isopropyl-Isothiourea (DrugBank:DB04018)	P00749	PLAU	1.33078	16
D-00422	DrugBank:DB04018|TTD:D0J1LO	S-Isopropyl-Isothiourea (DrugBank:DB04018)	P50579	METAP2	1.28867	17
D-00422	DrugBank:DB04018|TTD:D0J1LO	S-Isopropyl-Isothiourea (DrugBank:DB04018)	Q9UBY5	LPAR3	1.26429	18
D-00422	DrugBank:DB04018|TTD:D0J1LO	S-Isopropyl-Isothiourea (DrugBank:DB04018)	Q99720	SIGMAR1	1.24823	19
D-00422	DrugBank:DB04018|TTD:D0J1LO	S-Isopropyl-Isothiourea (DrugBank:DB04018)	O43570	CA12	1.24649	20
D-00424	DrugBank:DB02109|TTD:D05EHM|TTD:D0KN9E	Hadacidin (DrugBank:DB02109)	P28715	ERCC5	4.1934	1
D-00424	DrugBank:DB02109|TTD:D05EHM|TTD:D0KN9E	Hadacidin (DrugBank:DB02109)	Q9HBH1	PDF	3.83889	2
D-00424	DrugBank:DB02109|TTD:D05EHM|TTD:D0KN9E	Hadacidin (DrugBank:DB02109)	Q9UNA0	ADAMTS5	3.1008	3
D-00424	DrugBank:DB02109|TTD:D05EHM|TTD:D0KN9E	Hadacidin (DrugBank:DB02109)	Q15722	LTB4R	2.71516	4
D-00424	DrugBank:DB02109|TTD:D05EHM|TTD:D0KN9E	Hadacidin (DrugBank:DB02109)	P12821	ACE	2.58291	5
D-00424	DrugBank:DB02109|TTD:D05EHM|TTD:D0KN9E	Hadacidin (DrugBank:DB02109)	P08253	MMP2	2.15535	6
D-00424	DrugBank:DB02109|TTD:D05EHM|TTD:D0KN9E	Hadacidin (DrugBank:DB02109)	Q9UBN7	HDAC6	2.09158	7
D-00424	DrugBank:DB02109|TTD:D05EHM|TTD:D0KN9E	Hadacidin (DrugBank:DB02109)	P43119	PTGIR	1.91959	8
D-00424	DrugBank:DB02109|TTD:D05EHM|TTD:D0KN9E	Hadacidin (DrugBank:DB02109)	O75173	ADAMTS4	1.8748	9
D-00424	DrugBank:DB02109|TTD:D05EHM|TTD:D0KN9E	Hadacidin (DrugBank:DB02109)	Q14145	KEAP1	1.87385	10
D-00424	DrugBank:DB02109|TTD:D05EHM|TTD:D0KN9E	Hadacidin (DrugBank:DB02109)	P14780	MMP9	1.86038	11
D-00424	DrugBank:DB02109|TTD:D05EHM|TTD:D0KN9E	Hadacidin (DrugBank:DB02109)	P20292	ALOX5AP	1.84916	12
D-00424	DrugBank:DB02109|TTD:D05EHM|TTD:D0KN9E	Hadacidin (DrugBank:DB02109)	O14672	ADAM10	1.83975	13
D-00424	DrugBank:DB02109|TTD:D05EHM|TTD:D0KN9E	Hadacidin (DrugBank:DB02109)	P21731	TBXA2R	1.70041	14
D-00424	DrugBank:DB02109|TTD:D05EHM|TTD:D0KN9E	Hadacidin (DrugBank:DB02109)	P34913	EPHX2	1.60439	15
D-00424	DrugBank:DB02109|TTD:D05EHM|TTD:D0KN9E	Hadacidin (DrugBank:DB02109)	P08254	MMP3	1.47814	16
D-00424	DrugBank:DB02109|TTD:D05EHM|TTD:D0KN9E	Hadacidin (DrugBank:DB02109)	P41143	OPRD1	1.44027	17
D-00424	DrugBank:DB02109|TTD:D05EHM|TTD:D0KN9E	Hadacidin (DrugBank:DB02109)	P09960	LTA4H	1.43343	18
D-00424	DrugBank:DB02109|TTD:D05EHM|TTD:D0KN9E	Hadacidin (DrugBank:DB02109)	Q8N5Z0	AADAT	1.43242	19
D-00424	DrugBank:DB02109|TTD:D05EHM|TTD:D0KN9E	Hadacidin (DrugBank:DB02109)	P09917	ALOX5	1.39082	20
D-00424	DrugBank:DB02109|TTD:D05EHM|TTD:D0KN9E	Hadacidin (DrugBank:DB02109)	P30520	ADSS	0.813316	Known
D-00431	TTD:D00IUB		O75493	CA11	3.24413	1
D-00431	TTD:D00IUB		P00915	CA1	2.32558	2
D-00431	TTD:D00IUB		Q92731	ESR2	2.22633	3
D-00431	TTD:D00IUB		P00918	CA2	2.22055	Known
D-00431	TTD:D00IUB		P21397	MAOA	1.71127	4
D-00431	TTD:D00IUB		P11511	CYP19A1	1.53667	5
D-00431	TTD:D00IUB		P05121	SERPINE1	1.38943	6
D-00431	TTD:D00IUB		Q9NY33	DPP3	1.36247	7
D-00431	TTD:D00IUB		P28715	ERCC5	1.3237	8
D-00431	TTD:D00IUB		Q16678	CYP1B1	1.30819	9
D-00431	TTD:D00IUB		P03372	ESR1	1.25466	10
D-00431	TTD:D00IUB		P19099	CYP11B2	1.17542	11
D-00431	TTD:D00IUB		P53779	MAPK10	1.15815	12
D-00431	TTD:D00IUB		P10275	AR	1.13221	13
D-00431	TTD:D00IUB		P14061	HSD17B1	1.13064	14
D-00431	TTD:D00IUB		Q99714	HSD17B10	1.1125	15
D-00431	TTD:D00IUB		Q16539	MAPK14	1.06834	16
D-00431	TTD:D00IUB		P31645	SLC6A4	1.05554	17
D-00431	TTD:D00IUB		Q99436	PSMB7	1.0091	18
D-00431	TTD:D00IUB		P41594	GRM5	0.944167	19
D-00431	TTD:D00IUB		P15538	CYP11B1	0.934885	20
D-00431	TTD:D00IUB		O43570	CA12	0.240239	Known
D-00431	TTD:D00IUB		P07451	CA3	0.233703	Known
D-00439	IUPHAR:7566|TTD:D07SFI	benzamidine (IUPHAR:7566)	P09958	FURIN	4.625	1
D-00439	IUPHAR:7566|TTD:D07SFI	benzamidine (IUPHAR:7566)	Q15722	LTB4R	3.03038	2
D-00439	IUPHAR:7566|TTD:D07SFI	benzamidine (IUPHAR:7566)	P05981	HPN	2.81701	3
D-00439	IUPHAR:7566|TTD:D07SFI	benzamidine (IUPHAR:7566)	P08311	CTSG	2.69403	4
D-00439	IUPHAR:7566|TTD:D07SFI	benzamidine (IUPHAR:7566)	O60235	TMPRSS11D	2.63496	5
D-00439	IUPHAR:7566|TTD:D07SFI	benzamidine (IUPHAR:7566)	Q9Y5Y6	ST14	2.23512	6
D-00439	IUPHAR:7566|TTD:D07SFI	benzamidine (IUPHAR:7566)	P61073	CXCR4	2.08695	7
D-00439	IUPHAR:7566|TTD:D07SFI	benzamidine (IUPHAR:7566)	P00748	F12	2.06197	8
D-00439	IUPHAR:7566|TTD:D07SFI	benzamidine (IUPHAR:7566)	O15393	TMPRSS2	2.0005	9
D-00439	IUPHAR:7566|TTD:D07SFI	benzamidine (IUPHAR:7566)	Q15661	TPSAB1	1.98953	10
D-00439	IUPHAR:7566|TTD:D07SFI	benzamidine (IUPHAR:7566)	P00749	PLAU	1.70269	11
D-00439	IUPHAR:7566|TTD:D07SFI	benzamidine (IUPHAR:7566)	O43570	CA12	1.64977	12
D-00439	IUPHAR:7566|TTD:D07SFI	benzamidine (IUPHAR:7566)	P00742	F10	1.59901	Known
D-00439	IUPHAR:7566|TTD:D07SFI	benzamidine (IUPHAR:7566)	Q04756	HGFAC	1.58873	13
D-00439	IUPHAR:7566|TTD:D07SFI	benzamidine (IUPHAR:7566)	P19801	AOC1	1.55045	14
D-00439	IUPHAR:7566|TTD:D07SFI	benzamidine (IUPHAR:7566)	P00740	F9	1.48129	15
D-00439	IUPHAR:7566|TTD:D07SFI	benzamidine (IUPHAR:7566)	P35030	PRSS3	1.38722	16
D-00439	IUPHAR:7566|TTD:D07SFI	benzamidine (IUPHAR:7566)	Q9Y5N1	HRH3	1.28004	17
D-00439	IUPHAR:7566|TTD:D07SFI	benzamidine (IUPHAR:7566)	P35228	NOS2	1.26092	18
D-00439	IUPHAR:7566|TTD:D07SFI	benzamidine (IUPHAR:7566)	P29122	PCSK6	1.24148	19
D-00439	IUPHAR:7566|TTD:D07SFI	benzamidine (IUPHAR:7566)	P29120	PCSK1	1.21298	20
D-00444	IUPHAR:4565|KEGG:D02277|KEGG:D05576|TTD:D0X9RY	benzoate (IUPHAR:4565)|Sodium benzoate (JP17/NF) (KEGG:D02277)|Potassium benzoate (NF) (KEGG:D05576)	P04035	HMGCR	3.07597	1
D-00444	IUPHAR:4565|KEGG:D02277|KEGG:D05576|TTD:D0X9RY	benzoate (IUPHAR:4565)|Sodium benzoate (JP17/NF) (KEGG:D02277)|Potassium benzoate (NF) (KEGG:D05576)	P30989	NTSR1	2.7027	2
D-00444	IUPHAR:4565|KEGG:D02277|KEGG:D05576|TTD:D0X9RY	benzoate (IUPHAR:4565)|Sodium benzoate (JP17/NF) (KEGG:D02277)|Potassium benzoate (NF) (KEGG:D05576)	P37268	FDFT1	2.64824	3
D-00444	IUPHAR:4565|KEGG:D02277|KEGG:D05576|TTD:D0X9RY	benzoate (IUPHAR:4565)|Sodium benzoate (JP17/NF) (KEGG:D02277)|Potassium benzoate (NF) (KEGG:D05576)	P68400	CSNK2A1	2.23838	4
D-00444	IUPHAR:4565|KEGG:D02277|KEGG:D05576|TTD:D0X9RY	benzoate (IUPHAR:4565)|Sodium benzoate (JP17/NF) (KEGG:D02277)|Potassium benzoate (NF) (KEGG:D05576)	P19099	CYP11B2	2.18357	5
D-00444	IUPHAR:4565|KEGG:D02277|KEGG:D05576|TTD:D0X9RY	benzoate (IUPHAR:4565)|Sodium benzoate (JP17/NF) (KEGG:D02277)|Potassium benzoate (NF) (KEGG:D05576)	P35372	OPRM1	2.05514	6
D-00444	IUPHAR:4565|KEGG:D02277|KEGG:D05576|TTD:D0X9RY	benzoate (IUPHAR:4565)|Sodium benzoate (JP17/NF) (KEGG:D02277)|Potassium benzoate (NF) (KEGG:D05576)	P23141	CES1	2.04704	7
D-00444	IUPHAR:4565|KEGG:D02277|KEGG:D05576|TTD:D0X9RY	benzoate (IUPHAR:4565)|Sodium benzoate (JP17/NF) (KEGG:D02277)|Potassium benzoate (NF) (KEGG:D05576)	P15538	CYP11B1	1.88052	8
D-00444	IUPHAR:4565|KEGG:D02277|KEGG:D05576|TTD:D0X9RY	benzoate (IUPHAR:4565)|Sodium benzoate (JP17/NF) (KEGG:D02277)|Potassium benzoate (NF) (KEGG:D05576)	Q9Y5N1	HRH3	1.86913	9
D-00444	IUPHAR:4565|KEGG:D02277|KEGG:D05576|TTD:D0X9RY	benzoate (IUPHAR:4565)|Sodium benzoate (JP17/NF) (KEGG:D02277)|Potassium benzoate (NF) (KEGG:D05576)	P35354	PTGS2	1.85445	10
D-00444	IUPHAR:4565|KEGG:D02277|KEGG:D05576|TTD:D0X9RY	benzoate (IUPHAR:4565)|Sodium benzoate (JP17/NF) (KEGG:D02277)|Potassium benzoate (NF) (KEGG:D05576)	P49286	MTNR1B	1.85242	11
D-00444	IUPHAR:4565|KEGG:D02277|KEGG:D05576|TTD:D0X9RY	benzoate (IUPHAR:4565)|Sodium benzoate (JP17/NF) (KEGG:D02277)|Potassium benzoate (NF) (KEGG:D05576)	P23219	PTGS1	1.81964	12
D-00444	IUPHAR:4565|KEGG:D02277|KEGG:D05576|TTD:D0X9RY	benzoate (IUPHAR:4565)|Sodium benzoate (JP17/NF) (KEGG:D02277)|Potassium benzoate (NF) (KEGG:D05576)	O00748	CES2	1.69416	13
D-00444	IUPHAR:4565|KEGG:D02277|KEGG:D05576|TTD:D0X9RY	benzoate (IUPHAR:4565)|Sodium benzoate (JP17/NF) (KEGG:D02277)|Potassium benzoate (NF) (KEGG:D05576)	P09960	LTA4H	1.60792	14
D-00444	IUPHAR:4565|KEGG:D02277|KEGG:D05576|TTD:D0X9RY	benzoate (IUPHAR:4565)|Sodium benzoate (JP17/NF) (KEGG:D02277)|Potassium benzoate (NF) (KEGG:D05576)	Q9H244	P2RY12	1.5941	15
D-00444	IUPHAR:4565|KEGG:D02277|KEGG:D05576|TTD:D0X9RY	benzoate (IUPHAR:4565)|Sodium benzoate (JP17/NF) (KEGG:D02277)|Potassium benzoate (NF) (KEGG:D05576)	P28223	HTR2A	1.5563	16
D-00444	IUPHAR:4565|KEGG:D02277|KEGG:D05576|TTD:D0X9RY	benzoate (IUPHAR:4565)|Sodium benzoate (JP17/NF) (KEGG:D02277)|Potassium benzoate (NF) (KEGG:D05576)	P41143	OPRD1	1.49888	17
D-00444	IUPHAR:4565|KEGG:D02277|KEGG:D05576|TTD:D0X9RY	benzoate (IUPHAR:4565)|Sodium benzoate (JP17/NF) (KEGG:D02277)|Potassium benzoate (NF) (KEGG:D05576)	O00519	FAAH	1.48939	18
D-00444	IUPHAR:4565|KEGG:D02277|KEGG:D05576|TTD:D0X9RY	benzoate (IUPHAR:4565)|Sodium benzoate (JP17/NF) (KEGG:D02277)|Potassium benzoate (NF) (KEGG:D05576)	P21397	MAOA	1.48056	19
D-00444	IUPHAR:4565|KEGG:D02277|KEGG:D05576|TTD:D0X9RY	benzoate (IUPHAR:4565)|Sodium benzoate (JP17/NF) (KEGG:D02277)|Potassium benzoate (NF) (KEGG:D05576)	P27338	MAOB	1.44891	20
D-00444	IUPHAR:4565|KEGG:D02277|KEGG:D05576|TTD:D0X9RY	benzoate (IUPHAR:4565)|Sodium benzoate (JP17/NF) (KEGG:D02277)|Potassium benzoate (NF) (KEGG:D05576)	P14920	DAO	0.414422	Known
D-00453	DrugBank:DB04325|IUPHAR:2144|TTD:D0Q6PI	Phenethylamine (DrugBank:DB04325)|&beta;-phenylethylamine (IUPHAR:2144)	Q9Y2I1	NISCH	2.46868	1
D-00453	DrugBank:DB04325|IUPHAR:2144|TTD:D0Q6PI	Phenethylamine (DrugBank:DB04325)|&beta;-phenylethylamine (IUPHAR:2144)	Q99720	SIGMAR1	2.40525	2
D-00453	DrugBank:DB04325|IUPHAR:2144|TTD:D0Q6PI	Phenethylamine (DrugBank:DB04325)|&beta;-phenylethylamine (IUPHAR:2144)	P28335	HTR2C	2.33689	3
D-00453	DrugBank:DB04325|IUPHAR:2144|TTD:D0Q6PI	Phenethylamine (DrugBank:DB04325)|&beta;-phenylethylamine (IUPHAR:2144)	P50406	HTR6	2.27309	4
D-00453	DrugBank:DB04325|IUPHAR:2144|TTD:D0Q6PI	Phenethylamine (DrugBank:DB04325)|&beta;-phenylethylamine (IUPHAR:2144)	Q96RJ0	TAAR1	2.22025	Known
D-00453	DrugBank:DB04325|IUPHAR:2144|TTD:D0Q6PI	Phenethylamine (DrugBank:DB04325)|&beta;-phenylethylamine (IUPHAR:2144)	P28221	HTR1D	1.96043	5
D-00453	DrugBank:DB04325|IUPHAR:2144|TTD:D0Q6PI	Phenethylamine (DrugBank:DB04325)|&beta;-phenylethylamine (IUPHAR:2144)	Q15822	CHRNA2	1.85772	6
D-00453	DrugBank:DB04325|IUPHAR:2144|TTD:D0Q6PI	Phenethylamine (DrugBank:DB04325)|&beta;-phenylethylamine (IUPHAR:2144)	P23975	SLC6A2	1.79953	7
D-00453	DrugBank:DB04325|IUPHAR:2144|TTD:D0Q6PI	Phenethylamine (DrugBank:DB04325)|&beta;-phenylethylamine (IUPHAR:2144)	P32297	CHRNA3	1.69346	8
D-00453	DrugBank:DB04325|IUPHAR:2144|TTD:D0Q6PI	Phenethylamine (DrugBank:DB04325)|&beta;-phenylethylamine (IUPHAR:2144)	P16473	TSHR	1.62498	9
D-00453	DrugBank:DB04325|IUPHAR:2144|TTD:D0Q6PI	Phenethylamine (DrugBank:DB04325)|&beta;-phenylethylamine (IUPHAR:2144)	Q9H3N8	HRH4	1.52371	10
D-00453	DrugBank:DB04325|IUPHAR:2144|TTD:D0Q6PI	Phenethylamine (DrugBank:DB04325)|&beta;-phenylethylamine (IUPHAR:2144)	P49286	MTNR1B	1.46722	11
D-00453	DrugBank:DB04325|IUPHAR:2144|TTD:D0Q6PI	Phenethylamine (DrugBank:DB04325)|&beta;-phenylethylamine (IUPHAR:2144)	P28223	HTR2A	1.40643	12
D-00453	DrugBank:DB04325|IUPHAR:2144|TTD:D0Q6PI	Phenethylamine (DrugBank:DB04325)|&beta;-phenylethylamine (IUPHAR:2144)	O60341	KDM1A	1.36057	13
D-00453	DrugBank:DB04325|IUPHAR:2144|TTD:D0Q6PI	Phenethylamine (DrugBank:DB04325)|&beta;-phenylethylamine (IUPHAR:2144)	P41595	HTR2B	1.3442	14
D-00453	DrugBank:DB04325|IUPHAR:2144|TTD:D0Q6PI	Phenethylamine (DrugBank:DB04325)|&beta;-phenylethylamine (IUPHAR:2144)	P43681	CHRNA4	1.33194	15
D-00453	DrugBank:DB04325|IUPHAR:2144|TTD:D0Q6PI	Phenethylamine (DrugBank:DB04325)|&beta;-phenylethylamine (IUPHAR:2144)	P19099	CYP11B2	1.27446	16
D-00453	DrugBank:DB04325|IUPHAR:2144|TTD:D0Q6PI	Phenethylamine (DrugBank:DB04325)|&beta;-phenylethylamine (IUPHAR:2144)	O75762	TRPA1	1.27325	17
D-00453	DrugBank:DB04325|IUPHAR:2144|TTD:D0Q6PI	Phenethylamine (DrugBank:DB04325)|&beta;-phenylethylamine (IUPHAR:2144)	P28222	HTR1B	1.27249	18
D-00453	DrugBank:DB04325|IUPHAR:2144|TTD:D0Q6PI	Phenethylamine (DrugBank:DB04325)|&beta;-phenylethylamine (IUPHAR:2144)	P33527	ABCC1	1.24705	19
D-00453	DrugBank:DB04325|IUPHAR:2144|TTD:D0Q6PI	Phenethylamine (DrugBank:DB04325)|&beta;-phenylethylamine (IUPHAR:2144)	P28566	HTR1E	1.21481	20
D-00453	DrugBank:DB04325|IUPHAR:2144|TTD:D0Q6PI	Phenethylamine (DrugBank:DB04325)|&beta;-phenylethylamine (IUPHAR:2144)	P11509	CYP2A6	0.971528	Known
D-00456	DrugBank:DB01795|TTD:D0EJ9B	Phenyl Boronic Acid (DrugBank:DB01795)|Phenyl Boronic acid (TTD:D0EJ9B)	O75608	LYPLA1	3.77745	Known
D-00456	DrugBank:DB01795|TTD:D0EJ9B	Phenyl Boronic Acid (DrugBank:DB01795)|Phenyl Boronic acid (TTD:D0EJ9B)	O43570	CA12	3.31032	1
D-00456	DrugBank:DB01795|TTD:D0EJ9B	Phenyl Boronic Acid (DrugBank:DB01795)|Phenyl Boronic acid (TTD:D0EJ9B)	O75493	CA11	3.24413	2
D-00456	DrugBank:DB01795|TTD:D0EJ9B	Phenyl Boronic Acid (DrugBank:DB01795)|Phenyl Boronic acid (TTD:D0EJ9B)	O95372	LYPLA2	3.06839	Known
D-00456	DrugBank:DB01795|TTD:D0EJ9B	Phenyl Boronic Acid (DrugBank:DB01795)|Phenyl Boronic acid (TTD:D0EJ9B)	P25024	CXCR1	2.51705	3
D-00456	DrugBank:DB01795|TTD:D0EJ9B	Phenyl Boronic Acid (DrugBank:DB01795)|Phenyl Boronic acid (TTD:D0EJ9B)	Q8N1Q1	CA13	2.16809	4
D-00456	DrugBank:DB01795|TTD:D0EJ9B	Phenyl Boronic Acid (DrugBank:DB01795)|Phenyl Boronic acid (TTD:D0EJ9B)	P03372	ESR1	1.79962	5
D-00456	DrugBank:DB01795|TTD:D0EJ9B	Phenyl Boronic Acid (DrugBank:DB01795)|Phenyl Boronic acid (TTD:D0EJ9B)	Q9Y5X9	LIPG	1.69303	6
D-00456	DrugBank:DB01795|TTD:D0EJ9B	Phenyl Boronic Acid (DrugBank:DB01795)|Phenyl Boronic acid (TTD:D0EJ9B)	P07451	CA3	1.48098	7
D-00456	DrugBank:DB01795|TTD:D0EJ9B	Phenyl Boronic Acid (DrugBank:DB01795)|Phenyl Boronic acid (TTD:D0EJ9B)	P23975	SLC6A2	1.47787	8
D-00456	DrugBank:DB01795|TTD:D0EJ9B	Phenyl Boronic Acid (DrugBank:DB01795)|Phenyl Boronic acid (TTD:D0EJ9B)	Q92731	ESR2	1.36916	9
D-00456	DrugBank:DB01795|TTD:D0EJ9B	Phenyl Boronic Acid (DrugBank:DB01795)|Phenyl Boronic acid (TTD:D0EJ9B)	Q13822	ENPP2	1.25	10
D-00456	DrugBank:DB01795|TTD:D0EJ9B	Phenyl Boronic Acid (DrugBank:DB01795)|Phenyl Boronic acid (TTD:D0EJ9B)	P25025	CXCR2	1.21144	11
D-00456	DrugBank:DB01795|TTD:D0EJ9B	Phenyl Boronic Acid (DrugBank:DB01795)|Phenyl Boronic acid (TTD:D0EJ9B)	P43166	CA7	1.16478	Known
D-00456	DrugBank:DB01795|TTD:D0EJ9B	Phenyl Boronic Acid (DrugBank:DB01795)|Phenyl Boronic acid (TTD:D0EJ9B)	Q99714	HSD17B10	1.1125	12
D-00456	DrugBank:DB01795|TTD:D0EJ9B	Phenyl Boronic Acid (DrugBank:DB01795)|Phenyl Boronic acid (TTD:D0EJ9B)	P11413	G6PD	1.1027	13
D-00456	DrugBank:DB01795|TTD:D0EJ9B	Phenyl Boronic Acid (DrugBank:DB01795)|Phenyl Boronic acid (TTD:D0EJ9B)	Q9NY33	DPP3	1.05528	14
D-00456	DrugBank:DB01795|TTD:D0EJ9B	Phenyl Boronic Acid (DrugBank:DB01795)|Phenyl Boronic acid (TTD:D0EJ9B)	Q96KQ7	EHMT2	1.04992	15
D-00456	DrugBank:DB01795|TTD:D0EJ9B	Phenyl Boronic Acid (DrugBank:DB01795)|Phenyl Boronic acid (TTD:D0EJ9B)	Q16678	CYP1B1	0.999637	16
D-00456	DrugBank:DB01795|TTD:D0EJ9B	Phenyl Boronic Acid (DrugBank:DB01795)|Phenyl Boronic acid (TTD:D0EJ9B)	Q16790	CA9	0.980207	17
D-00456	DrugBank:DB01795|TTD:D0EJ9B	Phenyl Boronic Acid (DrugBank:DB01795)|Phenyl Boronic acid (TTD:D0EJ9B)	P22303	ACHE	0.968162	18
D-00456	DrugBank:DB01795|TTD:D0EJ9B	Phenyl Boronic Acid (DrugBank:DB01795)|Phenyl Boronic acid (TTD:D0EJ9B)	P14416	DRD2	0.963408	19
D-00456	DrugBank:DB01795|TTD:D0EJ9B	Phenyl Boronic Acid (DrugBank:DB01795)|Phenyl Boronic acid (TTD:D0EJ9B)	P00403	MT-CO2	0.958607	20
D-00456	DrugBank:DB01795|TTD:D0EJ9B	Phenyl Boronic Acid (DrugBank:DB01795)|Phenyl Boronic acid (TTD:D0EJ9B)	P23280	CA6	0.723052	Known
D-00464	DrugBank:DB03793|KEGG:D00038	Benzoic Acid (DrugBank:DB03793)|Benzoic acid (JP17/USP) (KEGG:D00038)	Q15722	LTB4R	2.98539	1
D-00464	DrugBank:DB03793|KEGG:D00038	Benzoic Acid (DrugBank:DB03793)|Benzoic acid (JP17/USP) (KEGG:D00038)	P10826	RARB	2.57702	2
D-00464	DrugBank:DB03793|KEGG:D00038	Benzoic Acid (DrugBank:DB03793)|Benzoic acid (JP17/USP) (KEGG:D00038)	P13631	RARG	2.31059	3
D-00464	DrugBank:DB03793|KEGG:D00038	Benzoic Acid (DrugBank:DB03793)|Benzoic acid (JP17/USP) (KEGG:D00038)	O00748	CES2	2.30712	4
D-00464	DrugBank:DB03793|KEGG:D00038	Benzoic Acid (DrugBank:DB03793)|Benzoic acid (JP17/USP) (KEGG:D00038)	P23141	CES1	2.29758	5
D-00464	DrugBank:DB03793|KEGG:D00038	Benzoic Acid (DrugBank:DB03793)|Benzoic acid (JP17/USP) (KEGG:D00038)	P00748	F12	2.12602	6
D-00464	DrugBank:DB03793|KEGG:D00038	Benzoic Acid (DrugBank:DB03793)|Benzoic acid (JP17/USP) (KEGG:D00038)	P27338	MAOB	2.08643	7
D-00464	DrugBank:DB03793|KEGG:D00038	Benzoic Acid (DrugBank:DB03793)|Benzoic acid (JP17/USP) (KEGG:D00038)	P49286	MTNR1B	2.07758	8
D-00464	DrugBank:DB03793|KEGG:D00038	Benzoic Acid (DrugBank:DB03793)|Benzoic acid (JP17/USP) (KEGG:D00038)	P31213	SRD5A2	2.05264	9
D-00464	DrugBank:DB03793|KEGG:D00038	Benzoic Acid (DrugBank:DB03793)|Benzoic acid (JP17/USP) (KEGG:D00038)	P42574	CASP3	2.02021	10
D-00464	DrugBank:DB03793|KEGG:D00038	Benzoic Acid (DrugBank:DB03793)|Benzoic acid (JP17/USP) (KEGG:D00038)	P47712	PLA2G4A	1.94057	11
D-00464	DrugBank:DB03793|KEGG:D00038	Benzoic Acid (DrugBank:DB03793)|Benzoic acid (JP17/USP) (KEGG:D00038)	P19099	CYP11B2	1.85572	12
D-00464	DrugBank:DB03793|KEGG:D00038	Benzoic Acid (DrugBank:DB03793)|Benzoic acid (JP17/USP) (KEGG:D00038)	Q04609	FOLH1	1.76497	13
D-00464	DrugBank:DB03793|KEGG:D00038	Benzoic Acid (DrugBank:DB03793)|Benzoic acid (JP17/USP) (KEGG:D00038)	P35354	PTGS2	1.75184	14
D-00464	DrugBank:DB03793|KEGG:D00038	Benzoic Acid (DrugBank:DB03793)|Benzoic acid (JP17/USP) (KEGG:D00038)	Q9Y5N1	HRH3	1.70992	15
D-00464	DrugBank:DB03793|KEGG:D00038	Benzoic Acid (DrugBank:DB03793)|Benzoic acid (JP17/USP) (KEGG:D00038)	P11511	CYP19A1	1.66548	16
D-00464	DrugBank:DB03793|KEGG:D00038	Benzoic Acid (DrugBank:DB03793)|Benzoic acid (JP17/USP) (KEGG:D00038)	P42330	AKR1C3	1.65208	17
D-00464	DrugBank:DB03793|KEGG:D00038	Benzoic Acid (DrugBank:DB03793)|Benzoic acid (JP17/USP) (KEGG:D00038)	P15538	CYP11B1	1.62024	18
D-00464	DrugBank:DB03793|KEGG:D00038	Benzoic Acid (DrugBank:DB03793)|Benzoic acid (JP17/USP) (KEGG:D00038)	Q9NS75	CYSLTR2	1.58718	19
D-00464	DrugBank:DB03793|KEGG:D00038	Benzoic Acid (DrugBank:DB03793)|Benzoic acid (JP17/USP) (KEGG:D00038)	P03372	ESR1	1.58371	20
D-00464	DrugBank:DB03793|KEGG:D00038	Benzoic Acid (DrugBank:DB03793)|Benzoic acid (JP17/USP) (KEGG:D00038)	P14920	DAO	0.414422	Known
D-00465	TTD:D0D7GL		P25090	FPR2	4.87148	1
D-00465	TTD:D0D7GL		O75388	GPR32	4.66441	2
D-00465	TTD:D0D7GL		Q15722	LTB4R	3.73978	3
D-00465	TTD:D0D7GL		Q9NPC1	LTB4R2	2.9455	4
D-00465	TTD:D0D7GL		Q8TDS5	OXER1	2.72219	5
D-00465	TTD:D0D7GL		Q99788	CMKLR1	2.39218	6
D-00465	TTD:D0D7GL		P21964	COMT	2.22461	7
D-00465	TTD:D0D7GL		Q02127	DHODH	2.13212	8
D-00465	TTD:D0D7GL		P04150	NR3C1	2.10066	9
D-00465	TTD:D0D7GL		Q92769	HDAC2	1.9438	10
D-00465	TTD:D0D7GL		Q9NS75	CYSLTR2	1.90546	11
D-00465	TTD:D0D7GL		P98170	XIAP	1.73799	12
D-00465	TTD:D0D7GL		Q9NY33	DPP3	1.58427	13
D-00465	TTD:D0D7GL		P29466	CASP1	1.58376	14
D-00465	TTD:D0D7GL		P05067	APP	1.55755	15
D-00465	TTD:D0D7GL		Q9Y271	CYSLTR1	1.52563	16
D-00465	TTD:D0D7GL		P11511	CYP19A1	1.4202	17
D-00465	TTD:D0D7GL		P04278	SHBG	1.40492	18
D-00465	TTD:D0D7GL		P34913	EPHX2	1.35736	19
D-00465	TTD:D0D7GL		P14679	TYR	1.35504	20
D-00465	TTD:D0D7GL		P09172	DBH	0.69897	Known
D-00466	DrugBank:DB02701|KEGG:D00036	Nicotinamide (DrugBank:DB02701)|Niacinamide (USP) (KEGG:D00036)	P35372	OPRM1	3.21188	1
D-00466	DrugBank:DB02701|KEGG:D00036	Nicotinamide (DrugBank:DB02701)|Niacinamide (USP) (KEGG:D00036)	O43570	CA12	3.18352	2
D-00466	DrugBank:DB02701|KEGG:D00036	Nicotinamide (DrugBank:DB02701)|Niacinamide (USP) (KEGG:D00036)	Q16790	CA9	2.80174	3
D-00466	DrugBank:DB02701|KEGG:D00036	Nicotinamide (DrugBank:DB02701)|Niacinamide (USP) (KEGG:D00036)	Q9Y5Y9	SCN10A	2.77313	4
D-00466	DrugBank:DB02701|KEGG:D00036	Nicotinamide (DrugBank:DB02701)|Niacinamide (USP) (KEGG:D00036)	O00519	FAAH	2.56767	5
D-00466	DrugBank:DB02701|KEGG:D00036	Nicotinamide (DrugBank:DB02701)|Niacinamide (USP) (KEGG:D00036)	Q9Y5N1	HRH3	2.46598	6
D-00466	DrugBank:DB02701|KEGG:D00036	Nicotinamide (DrugBank:DB02701)|Niacinamide (USP) (KEGG:D00036)	P41145	OPRK1	2.44576	7
D-00466	DrugBank:DB02701|KEGG:D00036	Nicotinamide (DrugBank:DB02701)|Niacinamide (USP) (KEGG:D00036)	P19099	CYP11B2	2.43264	8
D-00466	DrugBank:DB02701|KEGG:D00036	Nicotinamide (DrugBank:DB02701)|Niacinamide (USP) (KEGG:D00036)	P34913	EPHX2	2.33188	9
D-00466	DrugBank:DB02701|KEGG:D00036	Nicotinamide (DrugBank:DB02701)|Niacinamide (USP) (KEGG:D00036)	P41143	OPRD1	2.26616	10
D-00466	DrugBank:DB02701|KEGG:D00036	Nicotinamide (DrugBank:DB02701)|Niacinamide (USP) (KEGG:D00036)	P14324	FDPS	2.18083	11
D-00466	DrugBank:DB02701|KEGG:D00036	Nicotinamide (DrugBank:DB02701)|Niacinamide (USP) (KEGG:D00036)	P00918	CA2	2.16982	12
D-00466	DrugBank:DB02701|KEGG:D00036	Nicotinamide (DrugBank:DB02701)|Niacinamide (USP) (KEGG:D00036)	P57103	SLC8A3	2.13589	13
D-00466	DrugBank:DB02701|KEGG:D00036	Nicotinamide (DrugBank:DB02701)|Niacinamide (USP) (KEGG:D00036)	P35968	KDR	1.97713	14
D-00466	DrugBank:DB02701|KEGG:D00036	Nicotinamide (DrugBank:DB02701)|Niacinamide (USP) (KEGG:D00036)	Q13547	HDAC1	1.66959	15
D-00466	DrugBank:DB02701|KEGG:D00036	Nicotinamide (DrugBank:DB02701)|Niacinamide (USP) (KEGG:D00036)	P15538	CYP11B1	1.53397	16
D-00466	DrugBank:DB02701|KEGG:D00036	Nicotinamide (DrugBank:DB02701)|Niacinamide (USP) (KEGG:D00036)	P24557	TBXAS1	1.48915	17
D-00466	DrugBank:DB02701|KEGG:D00036	Nicotinamide (DrugBank:DB02701)|Niacinamide (USP) (KEGG:D00036)	P27815	PDE4A	1.46996	18
D-00466	DrugBank:DB02701|KEGG:D00036	Nicotinamide (DrugBank:DB02701)|Niacinamide (USP) (KEGG:D00036)	Q9ULX7	CA14	1.46971	19
D-00466	DrugBank:DB02701|KEGG:D00036	Nicotinamide (DrugBank:DB02701)|Niacinamide (USP) (KEGG:D00036)	P35367	HRH1	1.44361	20
D-00466	DrugBank:DB02701|KEGG:D00036	Nicotinamide (DrugBank:DB02701)|Niacinamide (USP) (KEGG:D00036)	Q8N6T7	SIRT6	1.34439	Known
D-00469	DrugBank:DB02192|KEGG:D00192	Phenylethyl alcohol (DrugBank:DB02192)|Phenylethyl alcohol (USP) (KEGG:D00192)	Q99720	SIGMAR1	2.53368	1
D-00469	DrugBank:DB02192|KEGG:D00192	Phenylethyl alcohol (DrugBank:DB02192)|Phenylethyl alcohol (USP) (KEGG:D00192)	Q9Y2I1	NISCH	2.46868	2
D-00469	DrugBank:DB02192|KEGG:D00192	Phenylethyl alcohol (DrugBank:DB02192)|Phenylethyl alcohol (USP) (KEGG:D00192)	P50406	HTR6	2.27309	3
D-00469	DrugBank:DB02192|KEGG:D00192	Phenylethyl alcohol (DrugBank:DB02192)|Phenylethyl alcohol (USP) (KEGG:D00192)	Q96RJ0	TAAR1	2.22025	Known
D-00469	DrugBank:DB02192|KEGG:D00192	Phenylethyl alcohol (DrugBank:DB02192)|Phenylethyl alcohol (USP) (KEGG:D00192)	Q9H3N8	HRH4	2.20866	4
D-00469	DrugBank:DB02192|KEGG:D00192	Phenylethyl alcohol (DrugBank:DB02192)|Phenylethyl alcohol (USP) (KEGG:D00192)	P28335	HTR2C	2.14055	5
D-00469	DrugBank:DB02192|KEGG:D00192	Phenylethyl alcohol (DrugBank:DB02192)|Phenylethyl alcohol (USP) (KEGG:D00192)	P28221	HTR1D	1.96043	6
D-00469	DrugBank:DB02192|KEGG:D00192	Phenylethyl alcohol (DrugBank:DB02192)|Phenylethyl alcohol (USP) (KEGG:D00192)	P23975	SLC6A2	1.79953	7
D-00469	DrugBank:DB02192|KEGG:D00192	Phenylethyl alcohol (DrugBank:DB02192)|Phenylethyl alcohol (USP) (KEGG:D00192)	P49286	MTNR1B	1.6747	8
D-00469	DrugBank:DB02192|KEGG:D00192	Phenylethyl alcohol (DrugBank:DB02192)|Phenylethyl alcohol (USP) (KEGG:D00192)	P16473	TSHR	1.62498	9
D-00469	DrugBank:DB02192|KEGG:D00192	Phenylethyl alcohol (DrugBank:DB02192)|Phenylethyl alcohol (USP) (KEGG:D00192)	P33527	ABCC1	1.54808	10
D-00469	DrugBank:DB02192|KEGG:D00192	Phenylethyl alcohol (DrugBank:DB02192)|Phenylethyl alcohol (USP) (KEGG:D00192)	Q9Y5N1	HRH3	1.46868	11
D-00469	DrugBank:DB02192|KEGG:D00192	Phenylethyl alcohol (DrugBank:DB02192)|Phenylethyl alcohol (USP) (KEGG:D00192)	P28223	HTR2A	1.40643	12
D-00469	DrugBank:DB02192|KEGG:D00192	Phenylethyl alcohol (DrugBank:DB02192)|Phenylethyl alcohol (USP) (KEGG:D00192)	P28222	HTR1B	1.39763	13
D-00469	DrugBank:DB02192|KEGG:D00192	Phenylethyl alcohol (DrugBank:DB02192)|Phenylethyl alcohol (USP) (KEGG:D00192)	P41595	HTR2B	1.38366	14
D-00469	DrugBank:DB02192|KEGG:D00192	Phenylethyl alcohol (DrugBank:DB02192)|Phenylethyl alcohol (USP) (KEGG:D00192)	P28566	HTR1E	1.37461	15
D-00469	DrugBank:DB02192|KEGG:D00192	Phenylethyl alcohol (DrugBank:DB02192)|Phenylethyl alcohol (USP) (KEGG:D00192)	P48039	MTNR1A	1.31471	16
D-00469	DrugBank:DB02192|KEGG:D00192	Phenylethyl alcohol (DrugBank:DB02192)|Phenylethyl alcohol (USP) (KEGG:D00192)	P83916	CBX1	1.25126	17
D-00469	DrugBank:DB02192|KEGG:D00192	Phenylethyl alcohol (DrugBank:DB02192)|Phenylethyl alcohol (USP) (KEGG:D00192)	P35367	HRH1	1.22637	18
D-00469	DrugBank:DB02192|KEGG:D00192	Phenylethyl alcohol (DrugBank:DB02192)|Phenylethyl alcohol (USP) (KEGG:D00192)	Q01959	SLC6A3	1.19585	19
D-00469	DrugBank:DB02192|KEGG:D00192	Phenylethyl alcohol (DrugBank:DB02192)|Phenylethyl alcohol (USP) (KEGG:D00192)	P35462	DRD3	1.16066	20
D-00470	DrugBank:DB04052	3,4-Dimethylphenol (DrugBank:DB04052)	O75608	LYPLA1	3.54145	1
D-00470	DrugBank:DB04052	3,4-Dimethylphenol (DrugBank:DB04052)	O95372	LYPLA2	2.87669	2
D-00470	DrugBank:DB04052	3,4-Dimethylphenol (DrugBank:DB04052)	P00915	CA1	2.32558	Known
D-00470	DrugBank:DB04052	3,4-Dimethylphenol (DrugBank:DB04052)	P00918	CA2	2.21362	Known
D-00470	DrugBank:DB04052	3,4-Dimethylphenol (DrugBank:DB04052)	P22303	ACHE	2.16864	3
D-00470	DrugBank:DB04052	3,4-Dimethylphenol (DrugBank:DB04052)	Q9NY33	DPP3	2.01615	4
D-00470	DrugBank:DB04052	3,4-Dimethylphenol (DrugBank:DB04052)	O75493	CA11	1.99256	5
D-00470	DrugBank:DB04052	3,4-Dimethylphenol (DrugBank:DB04052)	P41143	OPRD1	1.86601	6
D-00470	DrugBank:DB04052	3,4-Dimethylphenol (DrugBank:DB04052)	P03372	ESR1	1.8587	7
D-00470	DrugBank:DB04052	3,4-Dimethylphenol (DrugBank:DB04052)	Q92731	ESR2	1.65879	8
D-00470	DrugBank:DB04052	3,4-Dimethylphenol (DrugBank:DB04052)	P41145	OPRK1	1.54618	9
D-00470	DrugBank:DB04052	3,4-Dimethylphenol (DrugBank:DB04052)	Q16539	MAPK14	1.44358	10
D-00470	DrugBank:DB04052	3,4-Dimethylphenol (DrugBank:DB04052)	Q9H2X9	SLC12A5	1.42732	11
D-00470	DrugBank:DB04052	3,4-Dimethylphenol (DrugBank:DB04052)	P37058	HSD17B3	1.42097	12
D-00470	DrugBank:DB04052	3,4-Dimethylphenol (DrugBank:DB04052)	P14061	HSD17B1	1.38544	13
D-00470	DrugBank:DB04052	3,4-Dimethylphenol (DrugBank:DB04052)	P53779	MAPK10	1.28567	14
D-00470	DrugBank:DB04052	3,4-Dimethylphenol (DrugBank:DB04052)	P52895	AKR1C2	1.21559	15
D-00470	DrugBank:DB04052	3,4-Dimethylphenol (DrugBank:DB04052)	P35372	OPRM1	1.19369	16
D-00470	DrugBank:DB04052	3,4-Dimethylphenol (DrugBank:DB04052)	P51878	CASP5	1.17598	17
D-00470	DrugBank:DB04052	3,4-Dimethylphenol (DrugBank:DB04052)	Q99714	HSD17B10	1.175	18
D-00470	DrugBank:DB04052	3,4-Dimethylphenol (DrugBank:DB04052)	P49662	CASP4	1.12699	19
D-00470	DrugBank:DB04052	3,4-Dimethylphenol (DrugBank:DB04052)	P21917	DRD4	1.10811	20
D-00471	TTD:D0W9UV		P32247	BRS3	2.8514	1
D-00471	TTD:D0W9UV		P34998	CRHR1	2.46579	2
D-00471	TTD:D0W9UV		P30542	ADORA1	2.39268	3
D-00471	TTD:D0W9UV		P34913	EPHX2	2.33447	4
D-00471	TTD:D0W9UV		P0DMS8	ADORA3	2.32231	5
D-00471	TTD:D0W9UV		P50052	AGTR2	2.30987	6
D-00471	TTD:D0W9UV		P30411	BDKRB2	2.29031	7
D-00471	TTD:D0W9UV		Q9Y5N1	HRH3	2.22908	8
D-00471	TTD:D0W9UV		P30556	AGTR1	2.21098	9
D-00471	TTD:D0W9UV		O43570	CA12	2.18299	10
D-00471	TTD:D0W9UV		P00374	DHFR	2.15301	11
D-00471	TTD:D0W9UV		O94760	DDAH1	2.13072	12
D-00471	TTD:D0W9UV		P22303	ACHE	2.07081	13
D-00471	TTD:D0W9UV		P29475	NOS1	1.96888	Known
D-00471	TTD:D0W9UV		P29274	ADORA2A	1.88875	14
D-00471	TTD:D0W9UV		P35228	NOS2	1.84917	Known
D-00471	TTD:D0W9UV		P00918	CA2	1.82012	15
D-00471	TTD:D0W9UV		O14744	PRMT5	1.81628	16
D-00471	TTD:D0W9UV		P05067	APP	1.70584	17
D-00471	TTD:D0W9UV		P28845	HSD11B1	1.70048	18
D-00471	TTD:D0W9UV		P29474	NOS3	1.68161	Known
D-00471	TTD:D0W9UV		P42336	PIK3CA	1.67508	19
D-00471	TTD:D0W9UV		P78536	ADAM17	1.66804	20
D-00472	IUPHAR:1197|TTD:D0BT1A	2-pyridylethylamine (IUPHAR:1197)	P31645	SLC6A4	2.79587	1
D-00472	IUPHAR:1197|TTD:D0BT1A	2-pyridylethylamine (IUPHAR:1197)	P28223	HTR2A	2.71488	2
D-00472	IUPHAR:1197|TTD:D0BT1A	2-pyridylethylamine (IUPHAR:1197)	P21728	DRD1	2.49341	3
D-00472	IUPHAR:1197|TTD:D0BT1A	2-pyridylethylamine (IUPHAR:1197)	P35348	ADRA1A	2.31288	4
D-00472	IUPHAR:1197|TTD:D0BT1A	2-pyridylethylamine (IUPHAR:1197)	P21917	DRD4	1.94855	5
D-00472	IUPHAR:1197|TTD:D0BT1A	2-pyridylethylamine (IUPHAR:1197)	P25100	ADRA1D	1.88216	6
D-00472	IUPHAR:1197|TTD:D0BT1A	2-pyridylethylamine (IUPHAR:1197)	P35462	DRD3	1.86085	7
D-00472	IUPHAR:1197|TTD:D0BT1A	2-pyridylethylamine (IUPHAR:1197)	Q9Y5N1	HRH3	1.71385	8
D-00472	IUPHAR:1197|TTD:D0BT1A	2-pyridylethylamine (IUPHAR:1197)	P14416	DRD2	1.69976	9
D-00472	IUPHAR:1197|TTD:D0BT1A	2-pyridylethylamine (IUPHAR:1197)	P08172	CHRM2	1.63495	10
D-00472	IUPHAR:1197|TTD:D0BT1A	2-pyridylethylamine (IUPHAR:1197)	P11229	CHRM1	1.60443	11
D-00472	IUPHAR:1197|TTD:D0BT1A	2-pyridylethylamine (IUPHAR:1197)	Q9H3N8	HRH4	1.59904	12
D-00472	IUPHAR:1197|TTD:D0BT1A	2-pyridylethylamine (IUPHAR:1197)	P23975	SLC6A2	1.47136	13
D-00472	IUPHAR:1197|TTD:D0BT1A	2-pyridylethylamine (IUPHAR:1197)	P35368	ADRA1B	1.39758	14
D-00472	IUPHAR:1197|TTD:D0BT1A	2-pyridylethylamine (IUPHAR:1197)	P20309	CHRM3	1.39311	15
D-00472	IUPHAR:1197|TTD:D0BT1A	2-pyridylethylamine (IUPHAR:1197)	P18825	ADRA2C	1.36286	16
D-00472	IUPHAR:1197|TTD:D0BT1A	2-pyridylethylamine (IUPHAR:1197)	P50406	HTR6	1.34937	17
D-00472	IUPHAR:1197|TTD:D0BT1A	2-pyridylethylamine (IUPHAR:1197)	P34969	HTR7	1.22095	18
D-00472	IUPHAR:1197|TTD:D0BT1A	2-pyridylethylamine (IUPHAR:1197)	P41595	HTR2B	1.18256	19
D-00472	IUPHAR:1197|TTD:D0BT1A	2-pyridylethylamine (IUPHAR:1197)	P28335	HTR2C	1.09893	20
D-00472	IUPHAR:1197|TTD:D0BT1A	2-pyridylethylamine (IUPHAR:1197)	P35367	HRH1	0.88002	Known
D-00474	DrugBank:DB00627|IUPHAR:1588|IUPHAR:1594|KEGG:D00049|TTD:D06NVJ	Niacin (DrugBank:DB00627)|nicotinic acid (IUPHAR:1588)|[<sup>3</sup>H]nicotinic acid (IUPHAR:1594)|Niacin (USP) (KEGG:D00049)|Nicotinamide (TTD:D06NVJ)	P19099	CYP11B2	2.43264	1
D-00474	DrugBank:DB00627|IUPHAR:1588|IUPHAR:1594|KEGG:D00049|TTD:D06NVJ	Niacin (DrugBank:DB00627)|nicotinic acid (IUPHAR:1588)|[<sup>3</sup>H]nicotinic acid (IUPHAR:1594)|Niacin (USP) (KEGG:D00049)|Nicotinamide (TTD:D06NVJ)	P48443	RXRG	2.40836	2
D-00474	DrugBank:DB00627|IUPHAR:1588|IUPHAR:1594|KEGG:D00049|TTD:D06NVJ	Niacin (DrugBank:DB00627)|nicotinic acid (IUPHAR:1588)|[<sup>3</sup>H]nicotinic acid (IUPHAR:1594)|Niacin (USP) (KEGG:D00049)|Nicotinamide (TTD:D06NVJ)	P28702	RXRB	2.20897	3
D-00474	DrugBank:DB00627|IUPHAR:1588|IUPHAR:1594|KEGG:D00049|TTD:D06NVJ	Niacin (DrugBank:DB00627)|nicotinic acid (IUPHAR:1588)|[<sup>3</sup>H]nicotinic acid (IUPHAR:1594)|Niacin (USP) (KEGG:D00049)|Nicotinamide (TTD:D06NVJ)	P34913	EPHX2	2.18481	4
D-00474	DrugBank:DB00627|IUPHAR:1588|IUPHAR:1594|KEGG:D00049|TTD:D06NVJ	Niacin (DrugBank:DB00627)|nicotinic acid (IUPHAR:1588)|[<sup>3</sup>H]nicotinic acid (IUPHAR:1594)|Niacin (USP) (KEGG:D00049)|Nicotinamide (TTD:D06NVJ)	P49019	HCAR3	2.11383	5
D-00474	DrugBank:DB00627|IUPHAR:1588|IUPHAR:1594|KEGG:D00049|TTD:D06NVJ	Niacin (DrugBank:DB00627)|nicotinic acid (IUPHAR:1588)|[<sup>3</sup>H]nicotinic acid (IUPHAR:1594)|Niacin (USP) (KEGG:D00049)|Nicotinamide (TTD:D06NVJ)	Q9Y5N1	HRH3	2.11155	6
D-00474	DrugBank:DB00627|IUPHAR:1588|IUPHAR:1594|KEGG:D00049|TTD:D06NVJ	Niacin (DrugBank:DB00627)|nicotinic acid (IUPHAR:1588)|[<sup>3</sup>H]nicotinic acid (IUPHAR:1594)|Niacin (USP) (KEGG:D00049)|Nicotinamide (TTD:D06NVJ)	P13631	RARG	2.00403	7
D-00474	DrugBank:DB00627|IUPHAR:1588|IUPHAR:1594|KEGG:D00049|TTD:D06NVJ	Niacin (DrugBank:DB00627)|nicotinic acid (IUPHAR:1588)|[<sup>3</sup>H]nicotinic acid (IUPHAR:1594)|Niacin (USP) (KEGG:D00049)|Nicotinamide (TTD:D06NVJ)	Q16790	CA9	1.98597	8
D-00474	DrugBank:DB00627|IUPHAR:1588|IUPHAR:1594|KEGG:D00049|TTD:D06NVJ	Niacin (DrugBank:DB00627)|nicotinic acid (IUPHAR:1588)|[<sup>3</sup>H]nicotinic acid (IUPHAR:1594)|Niacin (USP) (KEGG:D00049)|Nicotinamide (TTD:D06NVJ)	O00519	FAAH	1.91408	9
D-00474	DrugBank:DB00627|IUPHAR:1588|IUPHAR:1594|KEGG:D00049|TTD:D06NVJ	Niacin (DrugBank:DB00627)|nicotinic acid (IUPHAR:1588)|[<sup>3</sup>H]nicotinic acid (IUPHAR:1594)|Niacin (USP) (KEGG:D00049)|Nicotinamide (TTD:D06NVJ)	P04049	RAF1	1.89906	10
D-00474	DrugBank:DB00627|IUPHAR:1588|IUPHAR:1594|KEGG:D00049|TTD:D06NVJ	Niacin (DrugBank:DB00627)|nicotinic acid (IUPHAR:1588)|[<sup>3</sup>H]nicotinic acid (IUPHAR:1594)|Niacin (USP) (KEGG:D00049)|Nicotinamide (TTD:D06NVJ)	P22303	ACHE	1.87318	11
D-00474	DrugBank:DB00627|IUPHAR:1588|IUPHAR:1594|KEGG:D00049|TTD:D06NVJ	Niacin (DrugBank:DB00627)|nicotinic acid (IUPHAR:1588)|[<sup>3</sup>H]nicotinic acid (IUPHAR:1594)|Niacin (USP) (KEGG:D00049)|Nicotinamide (TTD:D06NVJ)	P19793	RXRA	1.86315	12
D-00474	DrugBank:DB00627|IUPHAR:1588|IUPHAR:1594|KEGG:D00049|TTD:D06NVJ	Niacin (DrugBank:DB00627)|nicotinic acid (IUPHAR:1588)|[<sup>3</sup>H]nicotinic acid (IUPHAR:1594)|Niacin (USP) (KEGG:D00049)|Nicotinamide (TTD:D06NVJ)	P31213	SRD5A2	1.85547	13
D-00474	DrugBank:DB00627|IUPHAR:1588|IUPHAR:1594|KEGG:D00049|TTD:D06NVJ	Niacin (DrugBank:DB00627)|nicotinic acid (IUPHAR:1588)|[<sup>3</sup>H]nicotinic acid (IUPHAR:1594)|Niacin (USP) (KEGG:D00049)|Nicotinamide (TTD:D06NVJ)	P35372	OPRM1	1.76175	14
D-00474	DrugBank:DB00627|IUPHAR:1588|IUPHAR:1594|KEGG:D00049|TTD:D06NVJ	Niacin (DrugBank:DB00627)|nicotinic acid (IUPHAR:1588)|[<sup>3</sup>H]nicotinic acid (IUPHAR:1594)|Niacin (USP) (KEGG:D00049)|Nicotinamide (TTD:D06NVJ)	P10826	RARB	1.74376	15
D-00474	DrugBank:DB00627|IUPHAR:1588|IUPHAR:1594|KEGG:D00049|TTD:D06NVJ	Niacin (DrugBank:DB00627)|nicotinic acid (IUPHAR:1588)|[<sup>3</sup>H]nicotinic acid (IUPHAR:1594)|Niacin (USP) (KEGG:D00049)|Nicotinamide (TTD:D06NVJ)	P10276	RARA	1.74084	16
D-00474	DrugBank:DB00627|IUPHAR:1588|IUPHAR:1594|KEGG:D00049|TTD:D06NVJ	Niacin (DrugBank:DB00627)|nicotinic acid (IUPHAR:1588)|[<sup>3</sup>H]nicotinic acid (IUPHAR:1594)|Niacin (USP) (KEGG:D00049)|Nicotinamide (TTD:D06NVJ)	P37231	PPARG	1.6365	17
D-00474	DrugBank:DB00627|IUPHAR:1588|IUPHAR:1594|KEGG:D00049|TTD:D06NVJ	Niacin (DrugBank:DB00627)|nicotinic acid (IUPHAR:1588)|[<sup>3</sup>H]nicotinic acid (IUPHAR:1594)|Niacin (USP) (KEGG:D00049)|Nicotinamide (TTD:D06NVJ)	P50579	METAP2	1.55331	18
D-00474	DrugBank:DB00627|IUPHAR:1588|IUPHAR:1594|KEGG:D00049|TTD:D06NVJ	Niacin (DrugBank:DB00627)|nicotinic acid (IUPHAR:1588)|[<sup>3</sup>H]nicotinic acid (IUPHAR:1594)|Niacin (USP) (KEGG:D00049)|Nicotinamide (TTD:D06NVJ)	P15538	CYP11B1	1.53397	19
D-00474	DrugBank:DB00627|IUPHAR:1588|IUPHAR:1594|KEGG:D00049|TTD:D06NVJ	Niacin (DrugBank:DB00627)|nicotinic acid (IUPHAR:1588)|[<sup>3</sup>H]nicotinic acid (IUPHAR:1594)|Niacin (USP) (KEGG:D00049)|Nicotinamide (TTD:D06NVJ)	P35557	GCK	1.51105	20
D-00474	DrugBank:DB00627|IUPHAR:1588|IUPHAR:1594|KEGG:D00049|TTD:D06NVJ	Niacin (DrugBank:DB00627)|nicotinic acid (IUPHAR:1588)|[<sup>3</sup>H]nicotinic acid (IUPHAR:1594)|Niacin (USP) (KEGG:D00049)|Nicotinamide (TTD:D06NVJ)	Q8TDS4	HCAR2	0.967784	Known
D-00476	DrugBank:DB00339|KEGG:D00144|TTD:D0XF8W	Pyrazinamide (DrugBank:DB00339)|Pyrazinamide (JP17/USP/INN) (KEGG:D00144)|Pyrazinamide (TTD:D0XF8W)	Q9Y5N1	HRH3	3.17414	1
D-00476	DrugBank:DB00339|KEGG:D00144|TTD:D0XF8W	Pyrazinamide (DrugBank:DB00339)|Pyrazinamide (JP17/USP/INN) (KEGG:D00144)|Pyrazinamide (TTD:D0XF8W)	P14324	FDPS	2.69133	2
D-00476	DrugBank:DB00339|KEGG:D00144|TTD:D0XF8W	Pyrazinamide (DrugBank:DB00339)|Pyrazinamide (JP17/USP/INN) (KEGG:D00144)|Pyrazinamide (TTD:D0XF8W)	P00374	DHFR	2.40643	3
D-00476	DrugBank:DB00339|KEGG:D00144|TTD:D0XF8W	Pyrazinamide (DrugBank:DB00339)|Pyrazinamide (JP17/USP/INN) (KEGG:D00144)|Pyrazinamide (TTD:D0XF8W)	P00918	CA2	2.35279	4
D-00476	DrugBank:DB00339|KEGG:D00144|TTD:D0XF8W	Pyrazinamide (DrugBank:DB00339)|Pyrazinamide (JP17/USP/INN) (KEGG:D00144)|Pyrazinamide (TTD:D0XF8W)	P00742	F10	2.28378	5
D-00476	DrugBank:DB00339|KEGG:D00144|TTD:D0XF8W	Pyrazinamide (DrugBank:DB00339)|Pyrazinamide (JP17/USP/INN) (KEGG:D00144)|Pyrazinamide (TTD:D0XF8W)	P31645	SLC6A4	2.27315	6
D-00476	DrugBank:DB00339|KEGG:D00144|TTD:D0XF8W	Pyrazinamide (DrugBank:DB00339)|Pyrazinamide (JP17/USP/INN) (KEGG:D00144)|Pyrazinamide (TTD:D0XF8W)	P00813	ADA	2.27065	7
D-00476	DrugBank:DB00339|KEGG:D00144|TTD:D0XF8W	Pyrazinamide (DrugBank:DB00339)|Pyrazinamide (JP17/USP/INN) (KEGG:D00144)|Pyrazinamide (TTD:D0XF8W)	P35372	OPRM1	2.20507	8
D-00476	DrugBank:DB00339|KEGG:D00144|TTD:D0XF8W	Pyrazinamide (DrugBank:DB00339)|Pyrazinamide (JP17/USP/INN) (KEGG:D00144)|Pyrazinamide (TTD:D0XF8W)	P19099	CYP11B2	2.15467	9
D-00476	DrugBank:DB00339|KEGG:D00144|TTD:D0XF8W	Pyrazinamide (DrugBank:DB00339)|Pyrazinamide (JP17/USP/INN) (KEGG:D00144)|Pyrazinamide (TTD:D0XF8W)	O00767	SCD	2.15189	10
D-00476	DrugBank:DB00339|KEGG:D00144|TTD:D0XF8W	Pyrazinamide (DrugBank:DB00339)|Pyrazinamide (JP17/USP/INN) (KEGG:D00144)|Pyrazinamide (TTD:D0XF8W)	P34913	EPHX2	2.13129	11
D-00476	DrugBank:DB00339|KEGG:D00144|TTD:D0XF8W	Pyrazinamide (DrugBank:DB00339)|Pyrazinamide (JP17/USP/INN) (KEGG:D00144)|Pyrazinamide (TTD:D0XF8W)	P34972	CNR2	2.11305	12
D-00476	DrugBank:DB00339|KEGG:D00144|TTD:D0XF8W	Pyrazinamide (DrugBank:DB00339)|Pyrazinamide (JP17/USP/INN) (KEGG:D00144)|Pyrazinamide (TTD:D0XF8W)	P28223	HTR2A	2.05748	13
D-00476	DrugBank:DB00339|KEGG:D00144|TTD:D0XF8W	Pyrazinamide (DrugBank:DB00339)|Pyrazinamide (JP17/USP/INN) (KEGG:D00144)|Pyrazinamide (TTD:D0XF8W)	P56817	BACE1	1.9764	14
D-00476	DrugBank:DB00339|KEGG:D00144|TTD:D0XF8W	Pyrazinamide (DrugBank:DB00339)|Pyrazinamide (JP17/USP/INN) (KEGG:D00144)|Pyrazinamide (TTD:D0XF8W)	O00311	CDC7	1.90989	15
D-00476	DrugBank:DB00339|KEGG:D00144|TTD:D0XF8W	Pyrazinamide (DrugBank:DB00339)|Pyrazinamide (JP17/USP/INN) (KEGG:D00144)|Pyrazinamide (TTD:D0XF8W)	Q16539	MAPK14	1.89914	16
D-00476	DrugBank:DB00339|KEGG:D00144|TTD:D0XF8W	Pyrazinamide (DrugBank:DB00339)|Pyrazinamide (JP17/USP/INN) (KEGG:D00144)|Pyrazinamide (TTD:D0XF8W)	P35228	NOS2	1.89179	17
D-00476	DrugBank:DB00339|KEGG:D00144|TTD:D0XF8W	Pyrazinamide (DrugBank:DB00339)|Pyrazinamide (JP17/USP/INN) (KEGG:D00144)|Pyrazinamide (TTD:D0XF8W)	P05093	CYP17A1	1.87354	18
D-00476	DrugBank:DB00339|KEGG:D00144|TTD:D0XF8W	Pyrazinamide (DrugBank:DB00339)|Pyrazinamide (JP17/USP/INN) (KEGG:D00144)|Pyrazinamide (TTD:D0XF8W)	P15538	CYP11B1	1.81866	19
D-00476	DrugBank:DB00339|KEGG:D00144|TTD:D0XF8W	Pyrazinamide (DrugBank:DB00339)|Pyrazinamide (JP17/USP/INN) (KEGG:D00144)|Pyrazinamide (TTD:D0XF8W)	P41145	OPRK1	1.81034	20
D-00476	DrugBank:DB00339|KEGG:D00144|TTD:D0XF8W	Pyrazinamide (DrugBank:DB00339)|Pyrazinamide (JP17/USP/INN) (KEGG:D00144)|Pyrazinamide (TTD:D0XF8W)	Q8N6T7	SIRT6	1.34439	Known
D-00483	TTD:D0K6AK		P46098	HTR3A	4.05732	1
D-00483	TTD:D0K6AK		P25100	ADRA1D	3.59437	2
D-00483	TTD:D0K6AK		P08173	CHRM4	3.52429	3
D-00483	TTD:D0K6AK		P14416	DRD2	3.52271	4
D-00483	TTD:D0K6AK		P11229	CHRM1	3.34197	5
D-00483	TTD:D0K6AK		P18089	ADRA2B	3.23781	6
D-00483	TTD:D0K6AK		P08913	ADRA2A	3.14757	7
D-00483	TTD:D0K6AK		P20309	CHRM3	2.95608	8
D-00483	TTD:D0K6AK		Q9Y5N1	HRH3	2.84636	Known
D-00483	TTD:D0K6AK		P08912	CHRM5	2.77222	9
D-00483	TTD:D0K6AK		P28335	HTR2C	2.71441	10
D-00483	TTD:D0K6AK		P08172	CHRM2	2.70687	11
D-00483	TTD:D0K6AK		P07550	ADRB2	2.58263	12
D-00483	TTD:D0K6AK		P18825	ADRA2C	2.54008	13
D-00483	TTD:D0K6AK		P41595	HTR2B	2.50849	14
D-00483	TTD:D0K6AK		P35462	DRD3	2.35824	15
D-00483	TTD:D0K6AK		P21728	DRD1	2.31197	16
D-00483	TTD:D0K6AK		P28223	HTR2A	2.18999	17
D-00483	TTD:D0K6AK		P13945	ADRB3	2.12574	18
D-00483	TTD:D0K6AK		Q9H3N8	HRH4	1.96743	19
D-00483	TTD:D0K6AK		P47898	HTR5A	1.87901	20
D-00483	TTD:D0K6AK		P25021	HRH2	0.727265	Known
D-00484	TTD:D0H3DY		P14416	DRD2	3.96261	1
D-00484	TTD:D0H3DY		P25100	ADRA1D	3.59437	2
D-00484	TTD:D0H3DY		P08173	CHRM4	3.52429	3
D-00484	TTD:D0H3DY		P11229	CHRM1	3.34197	4
D-00484	TTD:D0H3DY		P18089	ADRA2B	3.23781	5
D-00484	TTD:D0H3DY		P46098	HTR3A	3.23173	6
D-00484	TTD:D0H3DY		P08913	ADRA2A	3.14757	7
D-00484	TTD:D0H3DY		P20309	CHRM3	2.95608	8
D-00484	TTD:D0H3DY		Q9Y5N1	HRH3	2.84636	Known
D-00484	TTD:D0H3DY		P08912	CHRM5	2.77222	9
D-00484	TTD:D0H3DY		P28335	HTR2C	2.71441	10
D-00484	TTD:D0H3DY		P08172	CHRM2	2.70687	11
D-00484	TTD:D0H3DY		P18825	ADRA2C	2.54008	12
D-00484	TTD:D0H3DY		P41595	HTR2B	2.50849	13
D-00484	TTD:D0H3DY		P35462	DRD3	2.35824	14
D-00484	TTD:D0H3DY		P21728	DRD1	2.31197	15
D-00484	TTD:D0H3DY		P28223	HTR2A	2.18999	16
D-00484	TTD:D0H3DY		P21917	DRD4	2.18664	17
D-00484	TTD:D0H3DY		P07550	ADRB2	2.10326	18
D-00484	TTD:D0H3DY		Q9H3N8	HRH4	1.96743	19
D-00484	TTD:D0H3DY		P31645	SLC6A4	1.72217	20
D-00484	TTD:D0H3DY		P25021	HRH2	0.727265	Known
D-00484	TTD:D0H3DY		P35367	HRH1	0.699268	Known
D-00486	TTD:D0N4EZ		P13866	SLC5A1	3.47276	1
D-00486	TTD:D0N4EZ		Q99538	LGMN	2.99967	2
D-00486	TTD:D0N4EZ		P31644	GABRA5	2.76853	3
D-00486	TTD:D0N4EZ		P28472	GABRB3	2.52934	4
D-00486	TTD:D0N4EZ		Q16445	GABRA6	2.45453	5
D-00486	TTD:D0N4EZ		Q9UBS5	GABBR1	2.37602	6
D-00486	TTD:D0N4EZ		Q92769	HDAC2	2.35473	7
D-00486	TTD:D0N4EZ		P47869	GABRA2	2.28143	8
D-00486	TTD:D0N4EZ		Q8IU80	TMPRSS6	2.21064	9
D-00486	TTD:D0N4EZ		P14867	GABRA1	2.18897	10
D-00486	TTD:D0N4EZ		P34903	GABRA3	2.15563	11
D-00486	TTD:D0N4EZ		P34913	EPHX2	2.02677	12
D-00486	TTD:D0N4EZ		P0DMS8	ADORA3	2.00521	13
D-00486	TTD:D0N4EZ		P09960	LTA4H	2.00426	14
D-00486	TTD:D0N4EZ		Q13547	HDAC1	1.94249	15
D-00486	TTD:D0N4EZ		P07288	KLK3	1.77179	16
D-00486	TTD:D0N4EZ		Q9UBN7	HDAC6	1.7514	17
D-00486	TTD:D0N4EZ		O15379	HDAC3	1.7489	18
D-00486	TTD:D0N4EZ		Q9H4A4	RNPEP	1.73999	19
D-00486	TTD:D0N4EZ		P61073	CXCR4	1.72569	20
D-00486	TTD:D0N4EZ		P24046	GABRR1	0.632875	Known
D-00490	DrugBank:DB11359|KEGG:D00117|TTD:D02JUW	Guaiacol (DrugBank:DB11359)|Guaiacol (JAN) (KEGG:D00117)	O75608	LYPLA1	3.77745	1
D-00490	DrugBank:DB11359|KEGG:D00117|TTD:D02JUW	Guaiacol (DrugBank:DB11359)|Guaiacol (JAN) (KEGG:D00117)	O75493	CA11	3.24413	2
D-00490	DrugBank:DB11359|KEGG:D00117|TTD:D02JUW	Guaiacol (DrugBank:DB11359)|Guaiacol (JAN) (KEGG:D00117)	O95372	LYPLA2	3.06839	3
D-00490	DrugBank:DB11359|KEGG:D00117|TTD:D02JUW	Guaiacol (DrugBank:DB11359)|Guaiacol (JAN) (KEGG:D00117)	Q16539	MAPK14	2.1148	4
D-00490	DrugBank:DB11359|KEGG:D00117|TTD:D02JUW	Guaiacol (DrugBank:DB11359)|Guaiacol (JAN) (KEGG:D00117)	Q92731	ESR2	2.06412	5
D-00490	DrugBank:DB11359|KEGG:D00117|TTD:D02JUW	Guaiacol (DrugBank:DB11359)|Guaiacol (JAN) (KEGG:D00117)	Q16678	CYP1B1	1.93353	6
D-00490	DrugBank:DB11359|KEGG:D00117|TTD:D02JUW	Guaiacol (DrugBank:DB11359)|Guaiacol (JAN) (KEGG:D00117)	P22748	CA4	1.92062	Known
D-00490	DrugBank:DB11359|KEGG:D00117|TTD:D02JUW	Guaiacol (DrugBank:DB11359)|Guaiacol (JAN) (KEGG:D00117)	P53779	MAPK10	1.79846	7
D-00490	DrugBank:DB11359|KEGG:D00117|TTD:D02JUW	Guaiacol (DrugBank:DB11359)|Guaiacol (JAN) (KEGG:D00117)	Q9NY33	DPP3	1.64486	8
D-00490	DrugBank:DB11359|KEGG:D00117|TTD:D02JUW	Guaiacol (DrugBank:DB11359)|Guaiacol (JAN) (KEGG:D00117)	P21728	DRD1	1.5038	9
D-00490	DrugBank:DB11359|KEGG:D00117|TTD:D02JUW	Guaiacol (DrugBank:DB11359)|Guaiacol (JAN) (KEGG:D00117)	P49286	MTNR1B	1.34923	10
D-00490	DrugBank:DB11359|KEGG:D00117|TTD:D02JUW	Guaiacol (DrugBank:DB11359)|Guaiacol (JAN) (KEGG:D00117)	Q9H2X9	SLC12A5	1.28009	11
D-00490	DrugBank:DB11359|KEGG:D00117|TTD:D02JUW	Guaiacol (DrugBank:DB11359)|Guaiacol (JAN) (KEGG:D00117)	P35462	DRD3	1.26642	12
D-00490	DrugBank:DB11359|KEGG:D00117|TTD:D02JUW	Guaiacol (DrugBank:DB11359)|Guaiacol (JAN) (KEGG:D00117)	P00918	CA2	1.26515	Known
D-00490	DrugBank:DB11359|KEGG:D00117|TTD:D02JUW	Guaiacol (DrugBank:DB11359)|Guaiacol (JAN) (KEGG:D00117)	Q96GD4	AURKB	1.26315	13
D-00490	DrugBank:DB11359|KEGG:D00117|TTD:D02JUW	Guaiacol (DrugBank:DB11359)|Guaiacol (JAN) (KEGG:D00117)	P23280	CA6	1.25965	Known
D-00490	DrugBank:DB11359|KEGG:D00117|TTD:D02JUW	Guaiacol (DrugBank:DB11359)|Guaiacol (JAN) (KEGG:D00117)	Q8NER1	TRPV1	1.23657	14
D-00490	DrugBank:DB11359|KEGG:D00117|TTD:D02JUW	Guaiacol (DrugBank:DB11359)|Guaiacol (JAN) (KEGG:D00117)	P04798	CYP1A1	1.23496	15
D-00490	DrugBank:DB11359|KEGG:D00117|TTD:D02JUW	Guaiacol (DrugBank:DB11359)|Guaiacol (JAN) (KEGG:D00117)	P05067	APP	1.13559	16
D-00490	DrugBank:DB11359|KEGG:D00117|TTD:D02JUW	Guaiacol (DrugBank:DB11359)|Guaiacol (JAN) (KEGG:D00117)	P11511	CYP19A1	1.13482	17
D-00490	DrugBank:DB11359|KEGG:D00117|TTD:D02JUW	Guaiacol (DrugBank:DB11359)|Guaiacol (JAN) (KEGG:D00117)	P27338	MAOB	1.07771	18
D-00490	DrugBank:DB11359|KEGG:D00117|TTD:D02JUW	Guaiacol (DrugBank:DB11359)|Guaiacol (JAN) (KEGG:D00117)	P03372	ESR1	1.07293	19
D-00490	DrugBank:DB11359|KEGG:D00117|TTD:D02JUW	Guaiacol (DrugBank:DB11359)|Guaiacol (JAN) (KEGG:D00117)	P11413	G6PD	1.07173	20
D-00490	DrugBank:DB11359|KEGG:D00117|TTD:D02JUW	Guaiacol (DrugBank:DB11359)|Guaiacol (JAN) (KEGG:D00117)	P00915	CA1	0.957451	Known
D-00496	TTD:D0Y8DZ		Q13224	GRIN2B	3.04293	1
D-00496	TTD:D0Y8DZ		Q9Y2I1	NISCH	2.68752	2
D-00496	TTD:D0Y8DZ		P61964	WDR5	2.39139	3
D-00496	TTD:D0Y8DZ		P11473	VDR	2.35181	4
D-00496	TTD:D0Y8DZ		O94760	DDAH1	2.27849	5
D-00496	TTD:D0Y8DZ		P08913	ADRA2A	2.23555	6
D-00496	TTD:D0Y8DZ		P48449	LSS	2.18536	7
D-00496	TTD:D0Y8DZ		P49356	FNTB	2.17971	8
D-00496	TTD:D0Y8DZ		P02753	RBP4	2.14235	9
D-00496	TTD:D0Y8DZ		P06276	BCHE	1.96586	10
D-00496	TTD:D0Y8DZ		P43115	PTGER3	1.939	11
D-00496	TTD:D0Y8DZ		P02768	ALB	1.85655	12
D-00496	TTD:D0Y8DZ		P22303	ACHE	1.73832	13
D-00496	TTD:D0Y8DZ		P35408	PTGER4	1.67912	14
D-00496	TTD:D0Y8DZ		P34995	PTGER1	1.62338	15
D-00496	TTD:D0Y8DZ		P06756	ITGAV	1.58229	16
D-00496	TTD:D0Y8DZ		P11413	G6PD	1.54674	17
D-00496	TTD:D0Y8DZ		P43119	PTGIR	1.54314	18
D-00496	TTD:D0Y8DZ		P07477	PRSS1	1.51914	19
D-00496	TTD:D0Y8DZ		P09958	FURIN	1.50545	20
D-00496	TTD:D0Y8DZ		P29474	NOS3	1.01768	Known
D-00496	TTD:D0Y8DZ		P35228	NOS2	0.972018	Known
D-00497	TTD:D0VN7G		P27487	DPP4	3.59715	1
D-00497	TTD:D0VN7G		P48449	LSS	3.3269	2
D-00497	TTD:D0VN7G		P34913	EPHX2	2.79876	3
D-00497	TTD:D0VN7G		P00742	F10	2.77447	4
D-00497	TTD:D0VN7G		Q13490	BIRC2	2.70078	5
D-00497	TTD:D0VN7G		P35348	ADRA1A	2.60831	6
D-00497	TTD:D0VN7G		Q13489	BIRC3	2.50179	7
D-00497	TTD:D0VN7G		O94760	DDAH1	2.34703	8
D-00497	TTD:D0VN7G		P35372	OPRM1	2.29704	9
D-00497	TTD:D0VN7G		P61073	CXCR4	2.26086	10
D-00497	TTD:D0VN7G		P28845	HSD11B1	2.18592	11
D-00497	TTD:D0VN7G		P07477	PRSS1	2.12502	12
D-00497	TTD:D0VN7G		P31645	SLC6A4	1.89327	13
D-00497	TTD:D0VN7G		Q96P09	BIRC8	1.82303	14
D-00497	TTD:D0VN7G		P51681	CCR5	1.80289	15
D-00497	TTD:D0VN7G		P12821	ACE	1.75824	16
D-00497	TTD:D0VN7G		P98170	XIAP	1.68606	17
D-00497	TTD:D0VN7G		P41145	OPRK1	1.6738	18
D-00497	TTD:D0VN7G		P11137	MAP2	1.66026	19
D-00497	TTD:D0VN7G		P25103	TACR1	1.65189	20
D-00497	TTD:D0VN7G		P29475	NOS1	0.765973	Known
D-00498	TTD:D04QFO		P12821	ACE	3.66858	1
D-00498	TTD:D04QFO		P35372	OPRM1	2.63341	2
D-00498	TTD:D04QFO		P41145	OPRK1	2.63153	3
D-00498	TTD:D04QFO		P28845	HSD11B1	2.48438	4
D-00498	TTD:D04QFO		P11229	CHRM1	2.35116	5
D-00498	TTD:D04QFO		O94760	DDAH1	2.27849	6
D-00498	TTD:D04QFO		P08173	CHRM4	2.24326	7
D-00498	TTD:D04QFO		P45452	MMP13	2.224	8
D-00498	TTD:D04QFO		P08172	CHRM2	2.18899	9
D-00498	TTD:D04QFO		P00918	CA2	2.12028	10
D-00498	TTD:D04QFO		P10275	AR	2.02526	11
D-00498	TTD:D04QFO		P03956	MMP1	1.94516	12
D-00498	TTD:D04QFO		P09237	MMP7	1.87256	13
D-00498	TTD:D04QFO		Q04609	FOLH1	1.85071	14
D-00498	TTD:D04QFO		P20309	CHRM3	1.78547	15
D-00498	TTD:D04QFO		P14780	MMP9	1.78436	16
D-00498	TTD:D04QFO		P08254	MMP3	1.74736	17
D-00498	TTD:D04QFO		P08253	MMP2	1.71167	18
D-00498	TTD:D04QFO		P11137	MAP2	1.66026	19
D-00498	TTD:D04QFO		P22894	MMP8	1.62896	20
D-00498	TTD:D04QFO		P29475	NOS1	0.938248	Known
D-00499	TTD:D0LE6N		P12821	ACE	2.75567	1
D-00499	TTD:D0LE6N		P78536	ADAM17	2.62327	2
D-00499	TTD:D0LE6N		P46531	NOTCH1	2.33576	3
D-00499	TTD:D0LE6N		Q9Y2I1	NISCH	2.31131	4
D-00499	TTD:D0LE6N		Q9UM47	NOTCH3	2.30771	5
D-00499	TTD:D0LE6N		O94760	DDAH1	2.27849	6
D-00499	TTD:D0LE6N		P00918	CA2	2.20272	7
D-00499	TTD:D0LE6N		P03956	MMP1	1.94516	8
D-00499	TTD:D0LE6N		P00797	REN	1.82282	9
D-00499	TTD:D0LE6N		P41145	OPRK1	1.81328	10
D-00499	TTD:D0LE6N		Q16790	CA9	1.79708	11
D-00499	TTD:D0LE6N		P06734	FCER2	1.7256	12
D-00499	TTD:D0LE6N		P08913	ADRA2A	1.7002	13
D-00499	TTD:D0LE6N		Q04609	FOLH1	1.67597	14
D-00499	TTD:D0LE6N		P14416	DRD2	1.6625	15
D-00499	TTD:D0LE6N		P11137	MAP2	1.66026	16
D-00499	TTD:D0LE6N		P49286	MTNR1B	1.63943	17
D-00499	TTD:D0LE6N		P09237	MMP7	1.60237	18
D-00499	TTD:D0LE6N		P21731	TBXA2R	1.59589	19
D-00499	TTD:D0LE6N		P21917	DRD4	1.58044	20
D-00499	TTD:D0LE6N		P29475	NOS1	1.27961	Known
D-00499	TTD:D0LE6N		P35228	NOS2	0.729227	Known
D-00499	TTD:D0LE6N		P29474	NOS3	0.249399	Known
D-00500	TTD:D00GYX		P21980	TGM2	2.79955	1
D-00500	TTD:D00GYX		P27338	MAOB	2.14924	2
D-00500	TTD:D00GYX		P21397	MAOA	2.06526	3
D-00500	TTD:D00GYX		P28074	PSMB5	1.90568	4
D-00500	TTD:D00GYX		P45452	MMP13	1.8235	5
[truncated: 307,399+ more rows]

## Sheet: Purchased compounds
TargetMol ID	IC50 (μM, GAL4)	IC50 (μM, HTRF)	Drug ID	External link	SMILES (original)	SMILES (standardized)	Name	wSDTNBI score	Rank
T2962				TargetMol:T2962	C[C@H](CCCC(C)C)[C@H]1CC[C@@H]2[C@@]1(CC[C@H]3[C@H]2CC[C@@H]4[C@@]3(CC[C@@H](C4)O)C)C (TargetMol:T2962)	CC(CCC[C@H]([C@H]1CC[C@@H]2[C@]1(C)CC[C@H]1[C@H]2CC[C@@H]2[C@]1(C)CC[C@@H](C2)O)C)C	Dihydrocholesterol (TargetMol:T2962)	2.84948	6
T0301				TargetMol:T0301	C[C@]12CCC(=O)C=C1CC[C@@H]3[C@@H]2CC[C@]4([C@H]3CC[C@]4(C#C)O)C (TargetMol:T0301)	C#C[C@]1(O)CC[C@@H]2[C@]1(C)CC[C@H]1[C@H]2CCC2=CC(=O)CC[C@]12C	Ethisterone (TargetMol:T0301)	2.77423	5
T2867				TargetMol:T2867	C[C@@H]1CC[C@@]2([C@H]([C@H]3[C@@H](O2)C[C@@H]4[C@@]3(CC[C@H]5[C@H]4CC=C6[C@@]5(CC[C@@H](C6)O)C)C)C)OC1 (TargetMol:T2867)	C[C@@H]1CC[C@@]2(OC1)O[C@@H]1[C@H]([C@@H]2C)[C@@]2([C@@H](C1)[C@@H]1CC=C3[C@]([C@H]1CC2)(C)CC[C@@H](C3)O)C	Diosgenin (TargetMol:T2867)	2.77423	2
T2905				TargetMol:T2905	C[C@H](CCCC(C)C)[C@H]1CC[C@@H]2[C@@]1(CC[C@H]3[C@H]2CC[C@@H]4[C@@]3(CCC(=O)C4)C)C (TargetMol:T2905)	CC(CCC[C@H]([C@H]1CC[C@@H]2[C@]1(C)CC[C@H]1[C@H]2CC[C@@H]2[C@]1(C)CCC(=O)C2)C)C	5alpha-Cholestan-3-one (TargetMol:T2905)	2.77423	5
T2918				TargetMol:T2918	C[C@H](CCCC(C)C)[C@H]1CC[C@@H]2[C@@]1(CC[C@H]3[C@H]2CC=C4[C@@]3(CC[C@@H](C4)OC(=O)C)C)C (TargetMol:T2918)	CC(CCC[C@H]([C@H]1CC[C@@H]2[C@]1(C)CC[C@H]1[C@H]2CC=C2[C@]1(C)CC[C@@H](C2)OC(=O)C)C)C	Cholesteryl Acetate (TargetMol:T2918)	2.77423	5
T2966				TargetMol:T2966	CC[C@H](CC[C@@H](C)[C@H]1CC[C@@H]2[C@@]1(CC[C@H]3[C@H]2CC=C4[C@@]3(CC[C@@H](C4)O)C)C)C(C)C (TargetMol:T2966)	CC[C@@H](C(C)C)CC[C@H]([C@H]1CC[C@@H]2[C@]1(C)CC[C@H]1[C@H]2CC=C2[C@]1(C)CC[C@@H](C2)O)C	Beta-Sitosterol (TargetMol:T2966)	2.77423	4
T3020				TargetMol:T3020	C[C@]12CCCC([C@@H]1CC[C@@]([C@@H]2CC[C@](C)(C=C)O)(C)O)(C)C (TargetMol:T3020)	C=C[C@@](CC[C@H]1[C@](C)(O)CC[C@@H]2[C@]1(C)CCCC2(C)C)(O)C	Sclareol (TargetMol:T3020)	2.77423	4
T3363				TargetMol:T3363	C[C@H]1C[C@@H]2[C@H]([C@H]([C@]3(O2)CC[C@H]4[C@@H]5CC=C6C[C@H](CC[C@@]6([C@H]5C(=O)C4=C3C)C)O)C)NC1 (TargetMol:T3363)	O[C@H]1CC[C@]2(C(=CC[C@@H]3[C@@H]2C(=O)C2=C(C)[C@]4(CC[C@@H]32)O[C@H]2[C@H]([C@H]4C)NC[C@H](C2)C)C1)C	Jervine (TargetMol:T3363)	2.77423	2
T3364	4.37 ± 1.55	19.81 ± 1.36		TargetMol:T3364	C[C@H]1C[C@H]([C@@H](NC1)[C@@H](C)C2=C(C3=C(C=C2)[C@@H]4CC=C5C[C@H](CC[C@@]5([C@H]4C3)C)O)C)O (TargetMol:T3364)	C[C@@H]1CN[C@H]([C@@H](C1)O)[C@H](c1ccc2c(c1C)C[C@H]1[C@H]2CC=C2[C@]1(C)CC[C@@H](C2)O)C	Veratramine (TargetMol:T3364)	2.77423	10
T6216			D-15942	DrugBank:DB05812|IUPHAR:6745|TTD:D02STN	[H][C@@]12CC=C(C3=CC=CN=C3)[C@@]1(C)CC[C@@]1([H])[C@@]2([H])CC=C2C[C@@H](O)CC[C@]12C (DrugBank:DB05812)|O[C@H]1CC[C@]2(C(=CC[C@@H]3[C@@H]2CC[C@]2([C@H]3CC=C2c2cccnc2)C)C1)C (IUPHAR:6745)|O[C@@H]1CC2=CC[C@@H]3[C@@H]([C@]2(CC1)C)CC[C@]1([C@H]3CC=C1c1cccnc1)C (TTD:D02STN)	O[C@H]1CC[C@]2(C(=CC[C@@H]3[C@@H]2CC[C@]2([C@H]3CC=C2c2cccnc2)C)C1)C	Abiraterone (DrugBank:DB05812)|abiraterone (IUPHAR:6745)|ABIRATERONE (TTD:D02STN)	2.77423	2
T6509			D-19047	DrugBank:DB12415|IUPHAR:8638|KEGG:D10125|TTD:D0U0BU	[H][C@@]12CC=C(N3C=NC4=CC=CC=C34)[C@@]1(C)CC[C@@]1([H])[C@@]2([H])CC=C2C[C@@]([H])(O)CC[C@]12C (DrugBank:DB12415)|O[C@H]1CC[C@]2(C(=CC[C@@H]3[C@@H]2CC[C@]2([C@H]3CC=C2n2cnc3c2cccc3)C)C1)C (IUPHAR:8638)|C1[C@@H](CC2=CC[C@@H]3[C@@H]([C@]2(C1)C)CC[C@]1([C@H]3CC=C1n1c2c(cccc2)nc1)C)O (KEGG:D10125)|O[C@@H]1CC2=CC[C@@H]3[C@@H]([C@]2(CC1)C)CC[C@]1([C@H]3CC=C1n1c2c(nc1)cccc2)C (TTD:D0U0BU)	O[C@H]1CC[C@]2(C(=CC[C@@H]3[C@@H]2CC[C@]2([C@H]3CC=C2n2cnc3c2cccc3)C)C1)C	Galeterone (DrugBank:DB12415)|galeterone (IUPHAR:8638)|Galeterone (USAN) (KEGG:D10125)	2.68102	5
T2207				TargetMol:T2207	C[C@]12CCC(=O)C=C1CC[C@@H]3[C@@H]2C(=O)C[C@]4([C@H]3CCC4=O)C (TargetMol:T2207)	O=C1CC[C@]2(C(=C1)CC[C@@H]1[C@@H]2C(=O)C[C@]2([C@H]1CCC2=O)C)C	Adrenosterone (TargetMol:T2207)	2.6528	8
T0948L			D-15672	DrugBank:DB04652|IUPHAR:2869|TTD:D01TDR|TTD:D03TNT	[H][C@@]1(CC[C@@]2([H])[C@]3([H])CCC4=CC(=O)CC[C@]4(C)[C@@]3([H])[C@@]([H])(O)C[C@]12C)C(=O)CO (DrugBank:DB04652)|OCC(=O)[C@H]1CC[C@@H]2[C@]1(C)C[C@H](O)[C@H]1[C@H]2CCC2=CC(=O)CC[C@]12C (IUPHAR:2869)|O[C@@H]1[C@H]2[C@H]([C@H]3[C@](C1)([C@H](CC3)C(=O)CO)C)CCC1=CC(=O)CC[C@]21C (TTD:D01TDR)|O[C@@H]1[C@H]2[C@H]([C@H]3[C@](C1)([C@H](CC3)C(=O)CO)C)CCC1=CC(=O)CC[C@]21C (TTD:D03TNT)	OCC(=O)[C@H]1CC[C@@H]2[C@]1(C)C[C@H](O)[C@H]1[C@H]2CCC2=CC(=O)CC[C@]12C	Corticosterone (DrugBank:DB04652)|corticosterone (IUPHAR:2869)	2.46147	7
T6023			D-27071	TTD:D01QKK	Clc1ccc([C@H]2N(C(=N[C@H]2c2ccc(Cl)cc2)c2c(OC(C)C)cc(OC)cc2)C(=O)N2CCNC(=O)C2)cc1 (TTD:D01QKK)	COc1ccc(c(c1)OC(C)C)C1=N[C@H]([C@H](N1C(=O)N1CCNC(=O)C1)c1ccc(cc1)Cl)c1ccc(cc1)Cl		2.42467	3
T2744				TargetMol:T2744	C[C@H](CCC(=O)OC)[C@H]1CC[C@@H]2[C@@]1([C@H](C[C@H]3[C@H]2[C@@H](C[C@H]4[C@@]3(CC[C@H](C4)O)C)O)O)C (TargetMol:T2744)	COC(=O)CC[C@H]([C@H]1CC[C@@H]2[C@]1(C)[C@@H](O)C[C@H]1[C@H]2[C@H](O)C[C@H]2[C@]1(C)CC[C@H](C2)O)C	Methyl Cholate (TargetMol:T2744)	2.3529	6
T2758				TargetMol:T2758	C[C@@H]1CC[C@@]2(CC[C@@]3(C(=CC[C@H]4[C@]3(C[C@H]([C@@H]5[C@@]4(C[C@H]([C@@H]([C@@]5(C)CO)O)O)C)O)C)[C@@H]2[C@H]1C)C)C(=O)O (TargetMol:T2758)	OC[C@]1(C)[C@@H](O)[C@H](O)C[C@]2([C@H]1[C@H](O)C[C@@]1([C@@H]2CC=C2[C@@]1(C)CC[C@@]1([C@H]2[C@@H](C)[C@@H](CC1)C)C(=O)O)C)C	Madecassic acid (TargetMol:T2758)	2.3529	7
T2831				TargetMol:T2831	C[C@H](CCC(=O)NCC(=O)O)[C@H]1CC[C@@H]2[C@@]1([C@H](C[C@H]3[C@H]2[C@@H](C[C@H]4[C@@]3(CC[C@H](C4)O)C)O)O)C (TargetMol:T2831)	O[C@@H]1CC[C@]2([C@@H](C1)C[C@H]([C@@H]1[C@@H]2C[C@H](O)[C@]2([C@H]1CC[C@@H]2[C@@H](CCC(=O)NCC(=O)O)C)C)O)C	Glycocholic acid (TargetMol:T2831)	2.3529	9
T2912				TargetMol:T2912	C[C@H](/C=C/[C@H](C)C(C)C)[C@H]1CC[C@@H]2[C@@]1(CC[C@H]3C2=CC=C4[C@@]3(CC[C@@H](C4)O)C)C (TargetMol:T2912)	O[C@H]1CC[C@]2(C(=CC=C3[C@@H]2CC[C@]2([C@H]3CC[C@@H]2[C@@H](/C=C/[C@@H](C(C)C)C)C)C)C1)C	Ergosterol (TargetMol:T2912)	2.3529	7
T2968				TargetMol:T2968	C[C@H](CCC(=O)O)[C@H]1CC[C@@H]2[C@@]1(CC[C@H]3[C@H]2C[C@@H]([C@H]4[C@@]3(CC[C@H](C4)O)C)O)C (TargetMol:T2968)	O[C@@H]1CC[C@]2([C@@H](C1)[C@@H](O)C[C@@H]1[C@@H]2CC[C@]2([C@H]1CC[C@@H]2[C@@H](CCC(=O)O)C)C)C	Hyodeoxycholic acid (HDCA) (TargetMol:T2968)	2.3529	8
T1525			D-28507	DrugBank:DB00503|IUPHAR:8804|KEGG:D00427|KEGG:D02498|TTD:D0ZU9R	CC(C)[C@H](NC(=O)N(C)CC1=CSC(=N1)C(C)C)C(=O)N[C@H](C[C@H](O)[C@H](CC1=CC=CC=C1)NC(=O)OCC1=CN=CS1)CC1=CC=CC=C1 (DrugBank:DB00503)|O=C(N[C@H]([C@H](C[C@H](Cc1ccccc1)NC(=O)[C@H](C(C)C)NC(=O)N(Cc1csc(n1)C(C)C)C)O)Cc1ccccc1)OCc1cncs1 (IUPHAR:8804)|[C@H](Cc1ccccc1)(C[C@@H]([C@H](Cc1ccccc1)NC(=O)OCc1cncs1)O)NC(=O)[C@@H](NC(=O)N(Cc1nc(sc1)C(C)C)C)C(C)C (KEGG:D00427)|[C@H](Cc1ccccc1)(C[C@@H]([C@H](Cc1cccc…	O=C(N[C@H]([C@H](C[C@H](Cc1ccccc1)NC(=O)[C@H](C(C)C)NC(=O)N(Cc1csc(n1)C(C)C)C)O)Cc1ccccc1)OCc1cncs1	Ritonavir (DrugBank:DB00503)|ritonavir (IUPHAR:8804)|Ritonavir (JAN/USAN/INN) (KEGG:D00427)|Lopinavir and ritonavir (KEGG:D02498)|Ritonavir (TTD:D0ZU9R)	2.34653	13
T3685			D-22230	DrugBank:DB14013|IUPHAR:8901	CCOC(=O)N1CCC(CN(CC2=CC=C(S2)[N+]([O-])=O)CC2=CC=C(Cl)C=C2)C1 (DrugBank:DB14013)|CCOC(=O)N1CCC(C1)CN(Cc1ccc(s1)[N+](=O)[O-])Cc1ccc(cc1)Cl (IUPHAR:8901)	CCOC(=O)N1CCC(C1)CN(Cc1ccc(s1)N(=O)=O)Cc1ccc(cc1)Cl	SR-9009 (DrugBank:DB14013)|SR9009 (IUPHAR:8901)	2.3419	10
T1789			D-21216	DrugBank:DB05990|IUPHAR:3435|KEGG:D09360|TTD:D0M4WA	[H][C@@](C)(CCC(O)=O)[C@@]1([H])CC[C@@]2([H])[C@]3([H])[C@]([H])(O)[C@]([H])(CC)[C@]4([H])C[C@]([H])(O)CC[C@]4(C)[C@@]3([H])CC[C@]12C (DrugBank:DB05990)|CC[C@H]1[C@@H](O)[C@H]2[C@@H]3CC[C@@H]([C@@]3(C)CC[C@@H]2[C@@]2([C@H]1C[C@H](O)CC2)C)[C@@H](CCC(=O)O)C (IUPHAR:3435)|C1[C@H](C[C@@H]2[C@](C1)([C@@H]1[C@@H]([C@@H]([C@@H]2CC)O)[C@H]2[C@](CC1)([C@H](CC2)[C@@H](CCC(=O)O)C)C)C)O (KEGG:D09360)|O[C@H]1…	CC[C@H]1[C@@H](O)[C@H]2[C@@H]3CC[C@@H]([C@@]3(C)CC[C@@H]2[C@@]2([C@H]1C[C@H](O)CC2)C)[C@@H](CCC(=O)O)C	Obeticholic acid (DrugBank:DB05990)|obeticholic acid (IUPHAR:3435)|Obeticholic acid (JAN/USAN/INN) (KEGG:D09360)|obeticholic acid (TTD:D0M4WA)	2.32663	6
T3613				TargetMol:T3613	C[C@]12CC[C@H]3[C@H]([C@@H]1CC[C@]2(C)O)CCC4=CC(=O)C=C[C@]34C (TargetMol:T3613)	O=C1C=C[C@]2(C(=C1)CC[C@@H]1[C@@H]2CC[C@]2([C@H]1CC[C@]2(C)O)C)C	Methandrostenolone (TargetMol:T3613)	2.27138	12
T1018			D-16726	DrugBank:DB00635|IUPHAR:7096|KEGG:D00473|TTD:D0IL7L	[H][C@@]12CC[C@](O)(C(=O)CO)[C@@]1(C)CC(=O)[C@@]1([H])[C@@]2([H])CCC2=CC(=O)C=C[C@]12C (DrugBank:DB00635)|OCC(=O)[C@@]1(O)CC[C@@H]2[C@]1(C)CC(=O)[C@H]1[C@H]2CCC2=CC(=O)C=C[C@]12C (IUPHAR:7096)|C1=C[C@]2(C(=CC1=O)CC[C@@H]1[C@@H]2C(=O)C[C@]2([C@H]1CC[C@@]2(C(=O)CO)O)C)C.O (KEGG:D00473)|O[C@]1([C@@]2([C@H]([C@H]3[C@@H]([C@@]4(C(=CC(=O)C=C4)CC3)C)C(=O)C2)CC1)C)C(=O)CO (TTD:D0IL7L)	OCC(=O)[C@@]1(O)CC[C@@H]2[C@]1(C)CC(=O)[C@H]1[C@H]2CCC2=CC(=O)C=C[C@]12C	Prednisone (DrugBank:DB00635)|prednisone (IUPHAR:7096)|Prednisone (USP) (KEGG:D00473)|Prednisone (TTD:D0IL7L)	2.22676	11
T2739				TargetMol:T2739	C1[C@H]([C@@H]([C@@H](C=C1C(=O)O)O)O)O (TargetMol:T2739)	O[C@@H]1CC(=C[C@H]([C@H]1O)O)C(=O)O	Shikimic Acid (TargetMol:T2739)	2.17829	6
T3039				TargetMol:T3039	C[C@]12CC[C@@H]([C@@]([C@@H]1CC[C@@]3([C@@H]2CC=C4[C@]3(CC[C@@]5([C@H]4CC(CC5)(C)C)C(=O)O)C)C)(C)CO)O (TargetMol:T3039)	OC[C@]1(C)[C@@H](O)CC[C@]2([C@H]1CC[C@@]1([C@@H]2CC=C2[C@@]1(C)CC[C@@]1([C@H]2CC(CC1)(C)C)C(=O)O)C)C	Hederagenin (TargetMol:T3039)	2.17549	9
T2866				TargetMol:T2866	C[C@]12CC[C@@H](C([C@@H]1CC[C@@]3([C@@H]2CC=C4[C@]3(C[C@H]([C@@]5([C@H]4CC(CC5)(C)C)C(=O)O)O)C)C)(C)C)O (TargetMol:T2866)	O[C@@H]1C[C@]2(C)C(=CC[C@H]3[C@@]2(C)CC[C@@H]2[C@]3(C)CC[C@@H](C2(C)C)O)[C@H]2[C@@]1(CCC(C2)(C)C)C(=O)O	Echinocystic acid (TargetMol:T2866)	2.17362	10
T1160				TargetMol:T1160	C[C@H]1[C@@H]2CC[C@]3([C@H]([C@]2(CC[C@H]1O)C)[C@@H](C[C@@H]\4[C@@]3(C[C@@H](/C4=C(/CCC=C(C)C)\C(=O)O)OC(=O)C)C)O)C (TargetMol:T1160)	CC(=O)O[C@H]1C[C@]2([C@H](/C/1=C(/C(=O)O)\CCC=C(C)C)C[C@H]([C@@H]1[C@]2(C)CC[C@@H]2[C@]1(C)CC[C@H]([C@H]2C)O)O)C	Fusidine (TargetMol:T1160)	2.1688	9
T1676			D-24495	DrugBank:DB01098|IUPHAR:2954|KEGG:D08492|TTD:D0JE2E	CC(C)C1=NC(=NC(C2=CC=C(F)C=C2)=C1\C=C\[C@@H](O)C[C@@H](O)CC(=O)O)N(C)S(C)(=O)=O (DrugBank:DB01098)|O[C@@H](C[C@H](CC(=O)O)O)/C=C/c1c(nc(nc1c1ccc(cc1)F)N(S(=O)(=O)C)C)C(C)C (IUPHAR:2954)|c1(nc(nc(c1/C=C/[C@@H](O)C[C@@H](O)CC(=O)O)C(C)C)N(S(=O)(=O)C)C)c1ccc(cc1)F (KEGG:D08492)|S(=O)(=O)(N(c1nc(C(C)C)c(c(n1)c1ccc(F)cc1)/C=C/[C@@H](O)C[C@@H](O)CC(=O)O)C)C (TTD:D0JE2E)	O[C@@H](C[C@H](CC(=O)O)O)/C=C/c1c(nc(nc1c1ccc(cc1)F)N(S(=O)(=O)C)C)C(C)C	Rosuvastatin (DrugBank:DB01098)|rosuvastatin (IUPHAR:2954)|Rosuvastatin (INN) (KEGG:D08492)|Rosuvastatin (TTD:D0JE2E)	2.16851	16
T3323	0.10 ± 0.02	0.01 ± 0.004		TargetMol:T3323	C[C@@H]1CC[C@@]2(CC[C@@]3(C(=CC[C@H]4[C@]3(CC[C@@H]5[C@@]4(CCC(=O)C5(C)C)C)C)[C@@H]2[C@H]1C)C)C(=O)O (TargetMol:T3323)	C[C@@H]1CC[C@]2([C@@H]([C@H]1C)C1=CC[C@H]3[C@@]([C@@]1(CC2)C)(C)CC[C@@H]1[C@]3(C)CCC(=O)C1(C)C)C(=O)O	Ursonic Acid (TargetMol:T3323)	2.10303	10
T2873				TargetMol:T2873	C[C@H]1[C@@H]([C@H]([C@H]([C@@H](O1)O[C@@H]2[C@H]([C@@H]([C@H](O[C@H]2O[C@H]3C[C@@]4([C@H](C[C@H]([C@H]5[C@]4(CC[C@@H]5[C@](C)(CCC=C(C)C)O)C)O)[C@@]6([C@@H]3C([C@H](CC6)O)(C)C)C)C)CO)O)O)O)O)O (TargetMol:T2873)	OC[C@H]1O[C@@H](O[C@H]2C[C@]3(C)[C@@H]([C@@]4([C@@H]2C(C)(C)[C@@H](O)CC4)C)C[C@H]([C@H]2[C@@]3(C)CC[C@@H]2[C@](CCC=C(C)C)(O)C)O)[C@@H]([C@H]([C@@H]1O)O)O[C@@H]1O[C@@H](C)[C@@H]([C@H]([C@H]1O)O)O	Ginsenoside Rg2 (TargetMol:T2873)	2.09354	9
T2881				TargetMol:T2881	C[C@]12CC[C@H]3C(=CC(=O)[C@H]4[C@@]3(C[C@@H]([C@@H](C4)O)O)C)[C@@]1(CC[C@@H]2[C@](C)([C@@H](CCC(C)(C)O)O)O)O (TargetMol:T2881)	O[C@H]1C[C@@]2(C)[C@@H](C[C@H]1O)C(=O)C=C1[C@@H]2CC[C@]2([C@@]1(O)CC[C@@H]2[C@]([C@@H](CCC(O)(C)C)O)(O)C)C	Ecdysterone (TargetMol:T2881)	2.09354	16
T2932				TargetMol:T2932	CC(=CCC[C@@](C)([C@H]1CC[C@@]2([C@@H]1[C@@H](C[C@H]3[C@]2(C[C@@H]([C@@H]4[C@@]3(CC[C@@H](C4(C)C)O)C)O[C@H]5[C@@H]([C@H]([C@@H]([C@H](O5)CO)O)O)O)C)O)C)O)C (TargetMol:T2932)	OC[C@H]1O[C@@H](O[C@H]2C[C@]3(C)[C@@H]([C@@]4([C@@H]2C(C)(C)[C@@H](O)CC4)C)C[C@H]([C@H]2[C@@]3(C)CC[C@@H]2[C@](CCC=C(C)C)(O)C)O)[C@@H]([C@H]([C@@H]1O)O)O	Ginsenoside Rh1 (TargetMol:T2932)	2.09354	9
T2959				TargetMol:T2959	CC(=CCC[C@@](C)([C@H]1CC[C@@]2([C@@H]1[C@@H](C[C@H]3[C@]2(CC[C@@H]4[C@@]3(CC[C@@H](C4(C)C)O[C@H]5[C@@H]([C@H]([C@@H]([C@H](O5)CO)O)O)O)C)C)O)C)O)C (TargetMol:T2959)	OC[C@H]1O[C@@H](O[C@H]2CC[C@]3([C@H](C2(C)C)CC[C@@]2([C@@H]3C[C@@H](O)[C@H]3[C@@]2(C)CC[C@@H]3[C@](CCC=C(C)C)(O)C)C)C)[C@@H]([C@H]([C@@H]1O)O)O	Ginsenoside Rh2 (TargetMol:T2959)	2.09354	12
T3402				TargetMol:T3402	CC(=CCC[C@@](C)([C@H]1CC[C@@]2([C@@H]1[C@@H](C[C@H]3[C@]2(CC[C@@H]4[C@@]3(CC[C@@H](C4(C)C)O[C@H]5[C@@H]([C@H]([C@@H]([C@H](O5)CO)O)O)O[C@H]6[C@@H]([C@H]([C@@H]([C@H](O6)CO)O)O)O)C)C)O)C)O)C (TargetMol:T3402)	OC[C@H]1O[C@@H](O[C@H]2CC[C@]3([C@H](C2(C)C)CC[C@@]2([C@@H]3C[C@@H](O)[C@H]3[C@@]2(C)CC[C@@H]3[C@](CCC=C(C)C)(O)C)C)C)[C@@H]([C@H]([C@@H]1O)O)O[C@@H]1O[C@H](CO)[C@H]([C@@H]([C@H]1O)O)O	Ginsenoside Rg3 (TargetMol:T3402)	2.09354	9
T1666			D-21315	KEGG:D00986	C1C(=O)C=C2[C@](C1)([C@@]1([C@@H](CC2)[C@H]2[C@@](C[C@@H]1O)(C)[C@](CC2)(C(=O)COC(=O)C)O)F)C (KEGG:D00986)	CC(=O)OCC(=O)[C@@]1(O)CC[C@@H]2[C@]1(C)C[C@H](O)[C@]1([C@H]2CCC2=CC(=O)CC[C@]12C)F	Fludrocortisone acetate (JP17/USP) (KEGG:D00986)	2.02703	12
T3248				TargetMol:T3248	C[C@@]12CC[C@@]3(C(=CC[C@H]4[C@]3(CC[C@@H]5[C@@]4(CC[C@H]([C@]5(C)C(=O)O)O)C)C)[C@@H]1CC(CC2)(C)C)C (TargetMol:T3248)	OC(=O)[C@@]1(C)[C@H](O)CC[C@]2([C@H]1CC[C@@]1([C@@H]2CC=C2[C@@]1(C)CC[C@@]1([C@H]2CC(CC1)(C)C)C)C)C	ALPHA-BOSWELLIC ACID (TargetMol:T3248)	2.01381	9
T0856L			D-10293	DrugBank:DB01708|IUPHAR:2370|KEGG:D08409|TTD:D00OAW|TTD:D0K0EK	[H][C@@]12CCC(=O)[C@@]1(C)CC[C@@]1([H])[C@@]2([H])CC=C2C[C@@]([H])(O)CC[C@]12C (DrugBank:DB01708)|O[C@H]1CC[C@]2(C(=CC[C@@H]3[C@@H]2CC[C@]2([C@H]3CCC2=O)C)C1)C (IUPHAR:2370)|[C@@H]12[C@@H]([C@@]3(C(=CC2)C[C@H](CC3)O)C)CC[C@]2([C@H]1CCC2=O)C (KEGG:D08409)|O=C1[C@@]2([C@H]([C@H]3[C@@H]([C@@]4(C(=CC3)C[C@@H](O)CC4)C)CC2)CC1)C (TTD:D00OAW)|O=C1[C@@]2([C@H]([C@H]3[C@@H]([C@@]4(C(=CC3)C[C@@H](O)CC4)C)C…	O[C@H]1CC[C@]2(C(=CC[C@@H]3[C@@H]2CC[C@]2([C@H]3CCC2=O)C)C1)C	Prasterone (DrugBank:DB01708)|dehydroepiandrosterone (IUPHAR:2370)|Prasterone (USAN/INN) (KEGG:D08409)|DHEA (TTD:D00OAW)	2.00946	6
T0476	4.30 ± 1.35	6.99 ± 0.69	D-20965	DrugBank:DB00421|IUPHAR:2875|KEGG:D00443|TTD:D0EP0C	[H][C@@]12CC[C@@]3(CCC(=O)O3)[C@@]1(C)CC[C@@]1([H])[C@@]2([H])[C@@]([H])(CC2=CC(=O)CC[C@]12C)SC(C)=O (DrugBank:DB00421)|CC(=O)S[C@@H]1CC2=CC(=O)CC[C@@]2([C@@H]2[C@@H]1[C@@H]1CC[C@]3([C@]1(CC2)C)CCC(=O)O3)C (IUPHAR:2875)|[C@@]12([C@@]3([C@@H](CC1)[C@H]1[C@H](CC3)[C@@]3(C(=CC(=O)CC3)C[C@H]1SC(=O)C)C)C)OC(=O)CC2 (KEGG:D00443)|S([C@H]1[C@H]2[C@H]3[C@@]([C@@]4(OC(=O)CC4)CC3)(CC[C@@H]2[C@@]2(C(=CC(=O)C…	CC(=O)S[C@@H]1CC2=CC(=O)CC[C@@]2([C@@H]2[C@@H]1[C@@H]1CC[C@]3([C@]1(CC2)C)CCC(=O)O3)C	Spironolactone (DrugBank:DB00421)|spironolactone (IUPHAR:2875)|Spironolactone (JP17/USP/INN) (KEGG:D00443)|Spironolactone (TTD:D0EP0C)	1.97755	11
T1171			D-18017	DrugBank:DB00959|IUPHAR:7088|KEGG:D00407|TTD:D08PIQ	[H][C@@]12CC[C@](O)(C(=O)CO)[C@@]1(C)C[C@H](O)[C@@]1([H])[C@@]2([H])C[C@H](C)C2=CC(=O)C=C[C@]12C (DrugBank:DB00959)|OCC(=O)[C@@]1(O)CC[C@@H]2[C@]1(C)C[C@H](O)[C@H]1[C@H]2C[C@@H](C2=CC(=O)C=C[C@]12C)C (IUPHAR:7088)|C1=C[C@]2(C(=CC1=O)[C@H](C[C@@H]1[C@@H]2[C@H](C[C@]2([C@H]1CC[C@@]2(C(=O)CO)O)C)O)C)C (KEGG:D00407)|O[C@]1([C@@]2([C@H]([C@H]3[C@H]([C@@H](O)C2)[C@@]2(C(=CC(=O)C=C2)[C@H](C3)C)C)CC1)C)C…	OCC(=O)[C@@]1(O)CC[C@@H]2[C@]1(C)C[C@H](O)[C@H]1[C@H]2C[C@@H](C2=CC(=O)C=C[C@]12C)C	Methylprednisolone (DrugBank:DB00959)|methylprednisolone (IUPHAR:7088)|Methylprednisolone (JP17/USP/INN) (KEGG:D00407)|Methylprednisolone Acetate (TTD:D08PIQ)	1.9738	9
T2738				TargetMol:T2738	CC1(CO)C(O)CCC2(C)C(CC=C3C=COC3=O)C(=C)CCC12 (TargetMol:T2738)	OCC1(C)C(O)CCC2(C1CCC(=C)C2CC=C1C=COC1=O)C	Dehydroandrographolide (TargetMol:T2738)	1.94172	11
T1783			D-21336	TTD:D02UID	Clc1c(Cn2nc3c(c2c2ccc(F)cc2)cccc3C(F)(F)F)ccc(F)c1 (TTD:D02UID)	Fc1ccc(cc1)c1n(Cc2ccc(cc2Cl)F)nc2c1cccc2C(F)(F)F		1.80134	15
T0107			D-23235	DrugBank:DB06786|KEGG:D01308|TTD:D06IIB	[H][C@@]12C[C@H]3OC(C)(C)O[C@@]3(C(=O)CCl)[C@@]1(C)C[C@H](O)[C@@]1(F)[C@@]2([H])CCC2=CC(=O)CC[C@]12C (DrugBank:DB06786)|C1C(=O)C=C2[C@](C1)([C@@]1([C@@H](CC2)[C@H]2[C@@](C[C@@H]1O)(C)[C@]1([C@@H](C2)OC(O1)(C)C)C(=O)CCl)F)C (KEGG:D01308)|ClCC(=O)[C@]12OC(O[C@@H]2C[C@@H]2[C@@]1(C[C@H](O)[C@@]1(F)[C@H]2CCC2=CC(=O)CC[C@]12C)C)(C)C (TTD:D06IIB)	ClCC(=O)[C@@]12OC(O[C@@H]1C[C@@H]1[C@]2(C)C[C@H](O)[C@]2([C@H]1CCC1=CC(=O)CC[C@]21C)F)(C)C	Halcinonide (DrugBank:DB06786)|Halcinonide (JAN/USP/INN) (KEGG:D01308)|Halcinonide (TTD:D06IIB)	1.79976	9
T1093			D-20669	DrugBank:DB00210|IUPHAR:5429|KEGG:D01112|TTD:D0JC9N	COC1=C(C=C(C=C1)C1=CC2=C(C=C1)C=C(C=C2)C(O)=O)C12CC3CC(CC(C3)C1)C2 (DrugBank:DB00210)|COc1ccc(cc1C12CC3CC(C2)CC(C1)C3)c1ccc2c(c1)ccc(c2)C(=O)O (IUPHAR:5429)|C12(CC3CC(C1)CC(C3)C2)c1c(ccc(c2ccc3c(c2)ccc(c3)C(=O)O)c1)OC (KEGG:D01112)|O(c1c(C23CC4CC(C2)CC(C3)C4)cc(cc1)c1cc2c(cc1)cc(cc2)C(=O)O)C (TTD:D0JC9N)	COc1ccc(cc1C12CC3CC(C2)CC(C1)C3)c1ccc2c(c1)ccc(c2)C(=O)O	Adapalene (DrugBank:DB00210)|adapalene (IUPHAR:5429)|Adapalene (JAN/USAN/INN) (KEGG:D01112)|Adapalene (TTD:D0JC9N)	1.79591	9
T2534			D-21172	KEGG:D01862|KEGG:D10568|KEGG:D11092|TTD:D0H9WN	[Ca+2].c1ccc2c(c1)c(c(c(n2)C1CC1)/C=C/[C@H](C[C@H](CC(=O)[O-])O)O)c1ccc(cc1)F.c1ccc2c(c1)c(c(c(n2)C1CC1)/C=C/[C@H](C[C@H](CC(=O)[O-])O)O)c1ccc(cc1)F (KEGG:D01862)|c1ccc2c(c1)c(c(c(n2)C1CC1)/C=C/[C@H](C[C@H](CC(=O)[O-])O)O)c1ccc(cc1)F.[CaH+].O.c1ccc2c(c1)c(c(c(n2)C1CC1)/C=C/[C@H](C[C@H](CC(=O)[O-])O)O)c1ccc(cc1)F.O.O.O.O (KEGG:D10568)|[Mg+2].c1ccc2c(c1)c(c(c(n2)C1CC1)/C=C/[C@H](C[C@H](CC(=O)[O-])O…	O[C@H](C[C@@H](/C=C/c1c(nc2c(c1c1ccc(cc1)F)cccc2)C1CC1)O)CC(=O)[O-]	Pitavastatin calcium (JAN) (KEGG:D01862)|Pitavastatin calcium hydrate (JP17) (KEGG:D10568)|Pitavastatin magnesium (KEGG:D11092)	1.79305	9
T3346	2.64 ± 1.86	0.89 ± 0.33	D-26471	IUPHAR:5921|TTD:D05APZ	O=c1[nH]c2c(n1C1CCN(CC1)Cc1ccc(cc1)c1nc3cc4[nH]cnc4cc3nc1c1ccccc1)cccc2 (IUPHAR:5921)|O=c1n(C2CCN(CC2)Cc2ccc(cc2)c2nc3c(nc2c2ccccc2)cc2nc[nH]c2c3)c2c([nH]1)cccc2 (TTD:D05APZ)	O=c1[nH]c2c(n1C1CCN(CC1)Cc1ccc(cc1)c1nc3cc4[nH]cnc4cc3nc1c1ccccc1)cccc2	Akt inhibitor VIII (IUPHAR:5921)|Akt inhibitor VIII (TTD:D05APZ)	1.79305	6
T2916				TargetMol:T2916	C[C@H]1CC[C@@]2([C@@]3([C@H]1C[C@H](C2(C)C)CC3)C)O (TargetMol:T2916)	C[C@H]1CC[C@@]2([C@@]3([C@H]1C[C@H](C2(C)C)CC3)C)O	Patchouli alcohol (TargetMol:T2916)	1.79172	12
T1652			D-19273	DrugBank:DB00443|IUPHAR:7061|KEGG:D00244|TTD:D0CW1P|TTD:D0J5MP|TTD:D0Y4LP	[H][C@@]12C[C@H](C)[C@](O)(C(=O)CO)[C@@]1(C)C[C@H](O)[C@@]1(F)[C@@]2([H])CCC2=CC(=O)C=C[C@]12C (DrugBank:DB00443)|OCC(=O)[C@@]1(O)[C@@H](C)C[C@@H]2[C@]1(C)C[C@H](O)[C@]1([C@H]2CCC2=CC(=O)C=C[C@]12C)F (IUPHAR:7061)|C1=C[C@]2(C(=CC1=O)CC[C@@H]1[C@@]2([C@H](C[C@]2([C@H]1C[C@@H]([C@@]2(C(=O)CO)O)C)C)O)F)C (KEGG:D00244)|F[C@@]12[C@H]([C@H]3[C@@]([C@](O)([C@H](C3)C)C(=O)CO)(C[C@@H]1O)C)CCC1=CC(=O)C=C[C…	OCC(=O)[C@@]1(O)[C@@H](C)C[C@@H]2[C@]1(C)C[C@H](O)[C@]1([C@H]2CCC2=CC(=O)C=C[C@]12C)F	Betamethasone (DrugBank:DB00443)|betamethasone (IUPHAR:7061)|Betamethasone (JP17/USP/INN) (KEGG:D00244)|Betamethasone (TTD:D0CW1P)	1.78554	10
T3241				TargetMol:T3241	CC1=CC[C@@H](CC1)C(=C)C (TargetMol:T3241)	CC1=CC[C@@H](CC1)C(=C)C	(R)-(+)-Limonene (TargetMol:T3241)	1.77327	14
T6696			D-16099	DrugBank:DB00799|IUPHAR:6952|KEGG:D01132|TTD:D0BM5G	CCOC(=O)C1=CN=C(C=C1)C#CC1=CC2=C(SCCC2(C)C)C=C1 (DrugBank:DB00799)|CCOC(=O)c1ccc(nc1)C#Cc1ccc2c(c1)C(C)(C)CCS2 (IUPHAR:6952)|c1(ccc(cn1)C(=O)OCC)C#Cc1ccc2SCCC(c2c1)(C)C (KEGG:D01132)|S1CCC(c2c1ccc(c2)C#Cc1ncc(cc1)C(=O)OCC)(C)C (TTD:D0BM5G)	CCOC(=O)c1ccc(nc1)C#Cc1ccc2c(c1)C(C)(C)CCS2	Tazarotene (DrugBank:DB00799)|tazarotene (IUPHAR:6952)|Tazarotene (JAN/USAN/INN) (KEGG:D01132)|Tazarotene (TTD:D0BM5G)	1.77091	13
T2526	2.08 ± 0.40	0.44 ± 0.04	D-26281	DrugBank:DB01410|IUPHAR:7469|KEGG:D01703|TTD:D0K7HU	[H][C@@]12C[C@@]3([H])[C@]4([H])CCC5=CC(=O)C=C[C@]5(C)[C@@]4([H])[C@@H](O)C[C@]3(C)[C@@]1(O[C@@H](O2)C1CCCCC1)C(=O)COC(=O)C(C)C (DrugBank:DB01410)|O=C(C(C)C)OCC(=O)[C@@]12O[C@@H](O[C@@H]1C[C@@H]1[C@]2(C)C[C@H](O)[C@H]2[C@H]1CCC1=CC(=O)C=C[C@]21C)C1CCCCC1 (IUPHAR:7469)|C1=C[C@]2(C(=CC1=O)CC[C@@H]1[C@@H]2[C@H](C[C@]2([C@H]1C[C@@H]1[C@@]2(C(=O)COC(=O)C(C)C)O[C@@H](O1)C1CCCCC1)C)O)C (KEGG:D01703)|O1[…	O=C(C(C)C)OCC(=O)[C@@]12O[C@@H](O[C@@H]1C[C@@H]1[C@]2(C)C[C@H](O)[C@H]2[C@H]1CCC1=CC(=O)C=C[C@]21C)C1CCCCC1	Ciclesonide (DrugBank:DB01410)|ciclesonide (IUPHAR:7469)|Ciclesonide (JAN/USAN/INN) (KEGG:D01703)|Ciclesonide (TTD:D0K7HU)	1.76656	16
T0672			D-21454	DrugBank:DB00175|IUPHAR:2953|KEGG:D08410|TTD:D02RQU	[H][C@]12[C@H](C[C@H](O)C=C1C=C[C@H](C)[C@@H]2CC[C@@H](O)C[C@@H](O)CC(O)=O)OC(=O)[C@@H](C)CC (DrugBank:DB00175)|CC[C@@H](C(=O)O[C@H]1C[C@H](O)C=C2[C@H]1[C@@H](CC[C@H](C[C@H](CC(=O)O)O)O)[C@H](C=C2)C)C (IUPHAR:2953)|[C@H]12[C@H]([C@H](C=CC2=C[C@H](C[C@@H]1OC(=O)[C@H](CC)C)O)C)CC[C@H](C[C@H](CC(=O)O)O)O (KEGG:D08410)|O([C@@H]1[C@@H]2[C@H]([C@H](C=CC2=C[C@@H](O)C1)C)CC[C@@H](O)C[C@@H](O)CC(=O)O)C(=O…	CC[C@@H](C(=O)O[C@H]1C[C@H](O)C=C2[C@H]1[C@@H](CC[C@H](C[C@H](CC(=O)O)O)O)[C@H](C=C2)C)C	Pravastatin (DrugBank:DB00175)|pravastatin (IUPHAR:2953)|Pravastatin (INN) (KEGG:D08410)|Pravastatin (TTD:D02RQU)	1.75942	11
T0270			D-21957	DrugBank:DB14540|KEGG:D01619	[H][C@@]12CC[C@](OC(=O)CCC)(C(=O)CO)[C@@]1(C)C[C@H](O)[C@@]1([H])[C@@]2([H])CCC2=CC(=O)CC[C@]12C (DrugBank:DB14540)|[C@@]12([C@H]([C@H]3[C@H]([C@H](C2)O)[C@@]2(C(=CC(=O)CC2)CC3)C)CC[C@@]1(C(=O)CO)OC(=O)CCC)C (KEGG:D01619)	CCCC(=O)O[C@@]1(CC[C@@H]2[C@]1(C)C[C@H](O)[C@H]1[C@H]2CCC2=CC(=O)CC[C@]12C)C(=O)CO	Hydrocortisone butyrate (DrugBank:DB14540)|Hydrocortisone butyrate (JP17/USP) (KEGG:D01619)	1.73552	12
T0276			D-22787	DrugBank:DB14544|KEGG:D02288	[H][C@@]12CC[C@](OC(=O)CCCC)(C(=O)CO)[C@@]1(C)C[C@H](O)[C@@]1([H])[C@@]2([H])CCC2=CC(=O)CC[C@]12C (DrugBank:DB14544)|[C@H]12[C@H]3[C@@H]([C@@]4(C(=CC(=O)CC4)CC3)C)[C@H](C[C@@]1([C@](CC2)(C(=O)CO)OC(=O)CCCC)C)O (KEGG:D02288)	CCCCC(=O)O[C@@]1(CC[C@@H]2[C@]1(C)C[C@H](O)[C@H]1[C@H]2CCC2=CC(=O)CC[C@]12C)C(=O)CO	Hydrocortisone valerate (DrugBank:DB14544)|Hydrocortisone valerate (USP) (KEGG:D02288)	1.72552	12
T2239L			D-22632	DrugBank:DB06817|KEGG:D06676|TTD:D08UQS	CN1C(=O)C(O)=C(N=C1C(C)(C)NC(=O)C1=NN=C(C)O1)C(=O)NCC1=CC=C(F)C=C1 (DrugBank:DB06817)|c1(C(=O)NC(c2nc(C(=O)NCc3ccc(cc3)F)c(c(=O)n2C)O)(C)C)oc(nn1)C (KEGG:D06676)|[K].Fc1ccc(CNC(=O)c2nc(n(c(=O)c2O)C)C(NC(=O)c2oc(nn2)C)(C)C)cc1 (TTD:D08UQS)	Fc1ccc(cc1)CNC(=O)c1nc(n(c(=O)c1O)C)C(NC(=O)c1nnc(o1)C)(C)C	Raltegravir (DrugBank:DB06817)|Raltegravir (USAN/INN) (KEGG:D06676)	1.69257	7
T6694			D-16086	DrugBank:DB04942|IUPHAR:2648|KEGG:D01418|TTD:D02GTY	CC1(C)CCC(C)(C)C2=C1C=CC(NC(=O)C1=CC=C(C=C1)C(O)=O)=C2 (DrugBank:DB04942)|O=C(c1ccc(cc1)C(=O)O)Nc1ccc2c(c1)C(C)(C)CCC2(C)C (IUPHAR:2648)|c12c(C(CCC1(C)C)(C)C)ccc(c2)NC(=O)c1ccc(cc1)C(=O)O (KEGG:D01418)|O=C(Nc1cc2C(CCC(c2cc1)(C)C)(C)C)c1ccc(cc1)C(=O)O (TTD:D02GTY)	O=C(c1ccc(cc1)C(=O)O)Nc1ccc2c(c1)C(C)(C)CCC2(C)C	Tamibarotene (DrugBank:DB04942)|tamibarotene (IUPHAR:2648)|Tamibarotene (JAN/INN) (KEGG:D01418)|Tamibarotene (TTD:D02GTY)	1.68524	12
T1332			D-19202	DrugBank:DB04930|KEGG:D05443|TTD:D0K8MP	CC1(C)C(C=C(Cl)Cl)C1C(=O)OCC1=CC(OC2=CC=CC=C2)=CC=C1 (DrugBank:DB04930)|C1(C(C1(C)C)C=C(Cl)Cl)C(=O)OCc1cccc(c1)Oc1ccccc1 (KEGG:D05443)|ClC(=CC1C(C1C(=O)OCc1cc(Oc2ccccc2)ccc1)(C)C)Cl (TTD:D0K8MP)	ClC(=CC1C(C1(C)C)C(=O)OCc1cccc(c1)Oc1ccccc1)Cl	Permethrin (DrugBank:DB04930)|Permethrin (USAN/INN) (KEGG:D05443)|Permethrin (TTD:D0K8MP)	1.66866	9
T1429			D-14249	TargetMol:T1429	CC(=O)[C@]1(CC[C@@H]2[C@@]1(CC[C@H]3[C@H]2CCC4=CC(=O)CC[C@]34C)C)O (TargetMol:T1429)	O=C1CC[C@]2(C(=C1)CC[C@@H]1[C@@H]2CC[C@]2([C@H]1CC[C@]2(O)C(=O)C)C)C	Hydroxyprogesterone (TargetMol:T1429)	1.66419	16
T2898			D-16010	TargetMol:T2898	C[C@@]12CC[C@H]([C@@]([C@H]1CCC(=C)[C@H]2C/C=C/3\[C@@H](COC3=O)O)(C)CO)O (TargetMol:T2898)	OC[C@]1(C)[C@H](O)CC[C@@]2([C@@H]1CCC(=C)[C@H]2C/C=C/1\[C@H](O)COC1=O)C	Andrographolide (TargetMol:T2898)	1.64146	7
T0337			D-20019	KEGG:D00980	C1=C[C@]2(C(=CC1=O)CC[C@@H]1[C@@H]2[C@H](C[C@]2([C@H]1CC[C@@]2(C(=O)COC(=O)C)O)C)O)C (KEGG:D00980)	CC(=O)OCC(=O)[C@@]1(O)CC[C@@H]2[C@]1(C)C[C@H](O)[C@H]1[C@H]2CCC2=CC(=O)C=C[C@]12C	Prednisolone acetate (JP17/USP/INN) (KEGG:D00980)	1.62725	13
T2895				TargetMol:T2895	CC(=C)[C@@H]1CC[C@]2([C@H]1[C@H]3CC[C@@H]4[C@]5(CC[C@@H](C([C@@H]5CC[C@]4([C@@]3(CC2)C)C)(C)C)O)C)C (TargetMol:T2895)	CC(=C)[C@@H]1CC[C@]2([C@H]1[C@H]1CC[C@H]3[C@@]([C@]1(C)CC2)(C)CC[C@@H]1[C@]3(C)CC[C@@H](C1(C)C)O)C	Lupeol (TargetMol:T2895)	1.60107	13
T6053			D-22258	DrugBank:DB12719|KEGG:D08277|TTD:D01SYU	CC(C)OC(=O)C1=CN(CC(C)(C)C2=C1NC1=CC=CC=C21)C(=O)C1=CC(F)=C(F)C=C1 (DrugBank:DB12719)|C1=C(c2c(C(CN1C(=O)c1ccc(c(c1)F)F)(C)C)c1c([nH]2)cccc1)C(=O)OC(C)C (KEGG:D08277)|Fc1cc(C(=O)N2CC(c3c([nH]c4c3cccc4)C(=C2)C(=O)OC(C)C)(C)C)ccc1F (TTD:D01SYU)	CC(OC(=O)C1=CN(CC(c2c1[nH]c1c2cccc1)(C)C)C(=O)c1ccc(c(c1)F)F)C	Turofexorate isopropyl (DrugBank:DB12719)|Turofexorate isopropyl (USAN/INN) (KEGG:D08277)	1.59865	12
T1573			D-22060	DrugBank:DB00180|IUPHAR:7076|KEGG:D00324	[H][C@@]12C[C@@]3([H])[C@]4([H])C[C@H](F)C5=CC(=O)C=C[C@]5(C)[C@@]4([H])[C@@H](O)C[C@]3(C)[C@@]1(OC(C)(C)O2)C(=O)CO (DrugBank:DB00180)|OCC(=O)[C@@]12OC(O[C@@H]1C[C@@H]1[C@]2(C)C[C@H](O)[C@H]2[C@H]1C[C@@H](C1=CC(=O)C=C[C@]21C)F)(C)C (IUPHAR:7076)|O.C1=C[C@]2(C(=CC1=O)[C@H](C[C@@H]1[C@@H]2[C@H](C[C@]2([C@H]1C[C@@H]1[C@@]2(C(=O)CO)OC(O1)(C)C)C)O)F)C.C1=C[C@]2(C(=CC1=O)[C@H](C[C@@H]1[C@@H]2[C@H](C[C@…	OCC(=O)[C@@]12OC(O[C@@H]1C[C@@H]1[C@]2(C)C[C@H](O)[C@H]2[C@H]1C[C@@H](C1=CC(=O)C=C[C@]21C)F)(C)C	Flunisolide (DrugBank:DB00180)|flunisolide (IUPHAR:7076)|Flunisolide (JAN/USP) (KEGG:D00324)	1.49476	17
T2375	4.97 ± 2.19	4.78 ± 0.60	D-22089	IUPHAR:767|TTD:D05XZF	NC(=O)Nc1cc(Cl)ccc1OCC(=O)N1CCN(C[C@H]1C)Cc1ccc(cc1)F (IUPHAR:767)|Clc1cc(NC(=O)N)c(OCC(=O)N2[C@@H](CN(CC2)Cc2ccc(F)cc2)C)cc1 (TTD:D05XZF)	NC(=O)Nc1cc(Cl)ccc1OCC(=O)N1CCN(C[C@H]1C)Cc1ccc(cc1)F	BX 471 (IUPHAR:767)	1.49367	8
T7004			D-08062	DrugBank:DB03172|IUPHAR:4755|TTD:D0H6WV	NC1=NC=NC2=C1C=CN2[C@@H]1O[C@H](CO)[C@@H](O)[C@H]1O (DrugBank:DB03172)|OC[C@H]1O[C@H]([C@@H]([C@@H]1O)O)n1ccc2c1ncnc2N (IUPHAR:4755)|O1[C@@H](n2c3ncnc(N)c3cc2)[C@H](O)[C@H](O)[C@H]1CO (TTD:D0H6WV)	OC[C@H]1O[C@H]([C@@H]([C@@H]1O)O)n1ccc2c1ncnc2N	Tubercidin (DrugBank:DB03172)|tubercidin (IUPHAR:4755)|tubercidin (TTD:D0H6WV)	1.46712	11
T6388			D-25312	DrugBank:DB00701|KEGG:D00894|TTD:D0A0OO	CC(C)CN(C[C@@H](O)[C@H](CC1=CC=CC=C1)NC(=O)O[C@H]1CCOC1)S(=O)(=O)C1=CC=C(N)C=C1 (DrugBank:DB00701)|c1(ccc(cc1)N)S(=O)(=O)N(C[C@H]([C@@H](NC(=O)O[C@@H]1COCC1)Cc1ccccc1)O)CC(C)C (KEGG:D00894)|S(=O)(=O)(N(C[C@@H](O)[C@@H](NC(=O)O[C@H]1CCOC1)Cc1ccccc1)CC(C)C)c1ccc(N)cc1 (TTD:D0A0OO)	CC(CN(S(=O)(=O)c1ccc(cc1)N)C[C@H]([C@H](Cc1ccccc1)NC(=O)O[C@H]1CCOC1)O)C	Amprenavir (DrugBank:DB00701)|Amprenavir (JAN/USAN/INN) (KEGG:D00894)|Amprenavir (TTD:D0A0OO)	1.46062	11
T0367			D-23085	DrugBank:DB00591|IUPHAR:7077|KEGG:D01825|TTD:D02QJH	[H][C@@]12C[C@@]3([H])[C@]4([H])C[C@H](F)C5=CC(=O)C=C[C@]5(C)[C@@]4(F)[C@@H](O)C[C@]3(C)[C@@]1(OC(C)(C)O2)C(=O)CO (DrugBank:DB00591)|OCC(=O)[C@@]12OC(O[C@@H]1C[C@@H]1[C@]2(C)C[C@H](O)[C@]2([C@H]1C[C@@H](C1=CC(=O)C=C[C@]21C)F)F)(C)C (IUPHAR:7077)|C1=C[C@]2(C(=CC1=O)[C@H](C[C@@H]1[C@@]2([C@H](C[C@]2([C@H]1C[C@@H]1[C@@]2(C(=O)CO)OC(O1)(C)C)C)O)F)F)C (KEGG:D01825)|F[C@@]12[C@H]([C@H]3[C@@]([C@@]4(OC(…	OCC(=O)[C@@]12OC(O[C@@H]1C[C@@H]1[C@]2(C)C[C@H](O)[C@]2([C@H]1C[C@@H](C1=CC(=O)C=C[C@]21C)F)F)(C)C	Fluocinolone acetonide (DrugBank:DB00591)|fluocinolone acetonide (IUPHAR:7077)|Fluocinolone acetonide (JP17/USP/INN) (KEGG:D01825)|Fluocinolone Acetonide (TTD:D02QJH)	1.39277	20
T0820			D-22061	IUPHAR:2867|KEGG:D00983	OCC(=O)[C@@]12OC(O[C@@H]1C[C@@H]1[C@]2(C)C[C@H](O)[C@]2([C@H]1CCC1=CC(=O)C=C[C@]21C)F)(C)C (IUPHAR:2867)|C1=C[C@]2(C(=CC1=O)CC[C@@H]1[C@@]2([C@H](C[C@]2([C@H]1C[C@@H]1[C@@]2(C(=O)CO)OC(O1)(C)C)C)O)F)C (KEGG:D00983)	OCC(=O)[C@@]12OC(O[C@@H]1C[C@@H]1[C@]2(C)C[C@H](O)[C@]2([C@H]1CCC1=CC(=O)C=C[C@]21C)F)(C)C	triamcinolone acetonide (IUPHAR:2867)|Triamcinolone acetonide (JP17/USP) (KEGG:D00983)	1.37852	18
T1038			D-09913	DrugBank:DB01073|IUPHAR:4802|KEGG:D07966|TTD:D0F2XQ	NC1=NC(F)=NC2=C1N=CN2[C@@H]1O[C@H](CO)[C@@H](O)[C@@H]1O (DrugBank:DB01073)|OC[C@H]1O[C@H]([C@H]([C@@H]1O)O)n1cnc2c1nc(F)nc2N (IUPHAR:4802)|[C@@H]1([C@@H]([C@@H](O[C@@H]1CO)n1c2nc(nc(c2nc1)N)F)O)O (KEGG:D07966)|Fc1nc2n([C@@H]3O[C@@H]([C@@H](O)[C@@H]3O)CO)cnc2c(n1)N (TTD:D0F2XQ)	OC[C@H]1O[C@H]([C@H]([C@@H]1O)O)n1cnc2c1nc(F)nc2N	Fludarabine (DrugBank:DB01073)|fludarabine (IUPHAR:4802)|Fludarabine (INN) (KEGG:D07966)|Fludarabine (TTD:D0F2XQ)	1.30728	11
T2827			D-24752	TargetMol:T2827	C[C@@H]1CC[C@@]2(CC[C@@]3(C(=CC[C@H]4[C@]3(CC[C@@H]5[C@@]4(C[C@H]([C@@H]([C@@]5(C)CO)O)O)C)C)[C@@H]2[C@H]1C)C)C(=O)O (TargetMol:T2827)	OC[C@]1(C)[C@@H](O)[C@H](O)C[C@]2([C@H]1CC[C@@]1([C@@H]2CC=C2[C@@]1(C)CC[C@@]1([C@H]2[C@@H](C)[C@@H](CC1)C)C(=O)O)C)C	Asiatic acid (TargetMol:T2827)	1.269	15
T0984			D-00592	DrugBank:DB00544|IUPHAR:4789|KEGG:D00584|KEGG:D07974|TTD:D05LEO|TTD:D08EPN|TTD:D0A7VK|TTD:D0K7CG	FC1=CNC(=O)NC1=O (DrugBank:DB00544)|Fc1c[nH]c(=O)[nH]c1=O (IUPHAR:4789)|c1(=O)c(c[nH]c(=O)[nH]1)F (KEGG:D00584)|c1(=O)c(c[nH]c(=O)[nH]1)F.[NaH] (KEGG:D07974)|Fc1c(=O)[nH]c(=O)[nH]c1 (TTD:D05LEO)|Fc1c(=O)[nH]c(=O)[nH]c1 (TTD:D08EPN)|Fc1c(=O)[nH]c(=O)[nH]c1 (TTD:D0A7VK)|Fc1c(=O)[nH]c(=O)[nH]c1 (TTD:D0K7CG)	Fc1c[nH]c(=O)[nH]c1=O	Fluorouracil (DrugBank:DB00544)|5-fluorouracil (IUPHAR:4789)|Fluorouracil (JP17/USP/INN) (KEGG:D00584)|Fluorouracil sodium salt (KEGG:D07974)|Fluorouracil (TTD:D05LEO)|5-Fluorouracil (TTD:D0K7CG)	1.20017	13
T3321	2.32 ± 0.22	0.28 ± 0.09	D-23223	TargetMol:T3321	C[C@]12CCC(=O)C([C@@H]1CC[C@@]3([C@@H]2CC=C4[C@]3(CC[C@@]5([C@H]4CC(CC5)(C)C)C(=O)O)C)C)(C)C (TargetMol:T3321)	OC(=O)[C@]12CC[C@@]3(C(=CC[C@H]4[C@@]3(C)CC[C@@H]3[C@]4(C)CCC(=O)C3(C)C)[C@@H]2CC(CC1)(C)C)C	Oleanonic Acid (TargetMol:T3321)	1.14617	17

## Sheet: Predicted ADMET properties
Web server	End point	Ursonic acid	Oleanonic acid	Ciclesonide	AKT inhibitor VIII	BX-471	Spironolactone	Veratramine
ADMETlab 2.0	LogS	-5.187	-5.175	-5.301	-3.024	-3.457	-4.49	-5.064
	LogD	5.153	5.029	4.186	4.259	2.759	2.867	3.828
	LogP	6.103	6.35	5.485	5.376	2.717	2.997	5.111
	Pgp-inh	0.011	0.005	0.993	1	0.95	0.988	0.967
	Pgp-sub	0	0	0.932	0.998	0.987	0.047	0.992
	HIA	0.006	0.026	0.003	0.008	0.004	0.015	0.021
	F(20%)	0.013	0.157	0.937	0.992	0.002	0.009	0.986
	F(30%)	0.959	0.97	0.055	0.049	0.004	0.988	0.07
	Caco-2	-5.453	-5.404	-4.844	-5.537	-5.394	-4.797	-5.066
	MDCK	9.79837e-06	1.05638e-05	2.97231e-05	1.36443e-05	1.86109e-05	2.07528e-05	7.49919e-06
	BBB	0.271	0.199	0.979	0.241	0.92	0.948	0.514
	PPB	0.966893	0.933521	0.913849	0.982091	0.948351	0.787097	0.946387
	VDss	0.745	0.846	1.576	4.447	1.279	0.423	1.96
	Fu	0.0226748	0.0389947	0.0403536	0.0142653	0.086416	0.0912852	0.0519928
	CYP1A2-inh	0.023	0.015	0.014	0.691	0.274	0.141	0.088
	CYP1A2-sub	0.759	0.51	0.301	0.436	0.428	0.605	0.688
	CYP2C19-inh	0.031	0.046	0.462	0.67	0.779	0.632	0.249
	CYP2C19-sub	0.936	0.92	0.649	0.05	0.843	0.727	0.941
	CYP2C9-inh	0.217	0.228	0.395	0.574	0.513	0.291	0.102
	CYP2C9-sub	0.842	0.924	0.025	0.058	0.335	0.072	0.187
	CYP2D6-inh	0.007	0.016	0.032	0.95	0.811	0.013	0.277
	CYP2D6-sub	0.228	0.332	0.02	0.395	0.853	0.098	0.889
	CYP3A4-inh	0.484	0.341	0.934	0.638	0.656	0.878	0.678
	CYP3A4-sub	0.376	0.209	0.791	0.606	0.872	0.675	0.406
	CL	3.71	2.818	14.75	7.224	11.193	11.375	10.59
	T12	0.173	0.181	0.304	0.08	0.129	0.899	0.074
	hERG	0.002	0.002	0.628	0.987	0.956	0.08	0.866
	H-HT	0.477	0.414	0.111	0.974	0.938	0.065	0.318
	DILI	0.04	0.027	0.291	0.977	0.969	0.662	0.05
	Ames	0.005	0.009	0.888	0.279	0.68	0.06	0.129
	ROA	0.425	0.25	0.774	0.405	0.115	0.513	0.703
	FDAMDD	0.649	0.824	0.944	0.962	0.838	0.81	0.933
	SkinSen	0.039	0.042	0.837	0.145	0.341	0.74	0.422
	Carcinogenicity	0.24	0.292	0.866	0.098	0.268	0.712	0.577
	EC	0.834	0.341	0.074	0.003	0.003	0.025	0.003
	EI	0.532	0.425	0.036	0.009	0.007	0.045	0.013
	Respiratory	0.982	0.979	0.982	0.884	0.047	0.775	0.957
	BCF	0.384	0.545	0.571	2.117	1.015	0.37	1.992
	IGC50	4.366	4.586	4.625	4.991	3.333	3.921	4.299
	LC50	5.911	5.931	6.056	6.3	4.553	4.349	5.079
	LC50DM	5.671	5.719	4.715	5.735	3.981	4.335	5.59
	NR-AR	0.911	0.904	0.967	0.014	0.814	0.936	0.018
	NR-AR-LBD	0.837	0.79	0.928	0.134	0.033	0.971	0.007
	NR-AhR	0.01	0.014	0.008	0.886	0.155	0.023	0.079
	NR-Aromatase	0.599	0.396	0.687	0.974	0.004	0.776	0.011
	NR-ER	0.734	0.807	0.87	0.525	0.604	0.794	0.481
	NR-ER-LBD	0.6	0.576	0.679	0.46	0.006	0.194	0.041
	NR-PPAR-gamma	0.528	0.611	0.276	0.658	0.009	0.406	0.005
	SR-ARE	0.405	0.484	0.907	0.922	0.561	0.914	0.064
	SR-ATAD5	0.433	0.607	0.133	0.899	0.008	0.034	0.006
	SR-HSE	0.504	0.591	0.082	0.904	0.007	0.206	0.056
	SR-MMP	0.95	0.931	0.71	0.841	0.273	0.942	0.715
	SR-p53	0.246	0.103	0.844	0.962	0.014	0.878	0.168
	MW	454.34	454.34	540.31	551.24	434.15	416.2	409.3
	Vol	503.115	503.115	559.039	571.752	416.647	424.002	450.797
	Dense	0.903	0.903	0.966	0.964	1.042	0.982	0.908
	nHA	3	3	7	8	7	4	3
	nHD	1	1	1	2	3	0	3
	TPSA	54.37	54.37	99.13	95.49	87.9	60.44	52.49
	nRot	1	1	6	5	8	2	2
	nRing	5	5	6	8	3	5	5
	MaxRing	22	22	20	13	6	17	17
	nHet	3	3	7	8	9	5	3
	fChar	0	0	0	0	0	0	0
	nRig	28	28	33	44	20	28	26
	Flex	0.036	0.036	0.182	0.114	0.4	0.071	0.077
	nStereo	9	7	9	0	1	7	8
	Toxicophores	0	0	2	2	1	2	0
	Acute_Aquatic_Toxicity	1	1	4	0	1	2	0
	LD50_oral	0	0	0	0	0	0	0
	NonGenotoxic_Carcinogenicity	0	0	1	1	1	0	0
	Skin_Sensitization	1	1	6	0	5	3	0
	SureChEMBL	0	0	0	0	0	1	0
	Genotoxic_Carcinogenicity_Mutagenicity	0	0	1	3	1	0	0
	NonBiodegradable	1	1	2	0	1	1	0
	QED	0.423	0.419	0.398	0.261	0.731	0.452	0.626
	Synth	4.701	4.554	5.026	2.71	2.646	5.352	4.86
	Fsp3	0.867	0.867	0.781	0.176	0.333	0.792	0.704
	MCE-18	101.786	104.464	104	87.75	62.429	119.814	108.261
	Natural Product-likeness	3.219	3.305	1.992	-1.016	-2.035	1.962	2.544
	Alarm_NMR	0	0	1	0	1	2	0
	BMS	0	0	0	0	0	1	0
	Chelating	0	0	0	0	0	0	0
	PAINS	0	0	0	0	0	0	0
	Lipinski	Accepted	Accepted	Rejected	Rejected	Accepted	Accepted	Accepted
	Pfizer	Rejected	Rejected	Accepted	Accepted	Accepted	Accepted	Rejected
	GSK	Rejected	Rejected	Rejected	Rejected	Rejected	Rejected	Rejected
	GoldenTriangle	Rejected	Rejected	Rejected	Rejected	Accepted	Accepted	Accepted
admetSAR 2.0	Ames mutagenesis	-	-	-	-	-	-	-
	Acute Oral Toxicity (c)	III	III	I	III	III	III	III
	Androgen receptor binding	+	+	+	+	+	+	+
	Aromatase binding	+	+	+	+	+	+	+
	Avian toxicity	-	-	-	-	-	-	-
	Blood Brain Barrier	-	-	+	+	+	-	+
	BRCP inhibitior	-	-	-	-	-	-	-
	Biodegradation	-	-	-	-	-	-	-
	BSEP inhibitior	+	+	+	+	+	+	+
	Caco-2	+	+	-	-	-	+	-
	Carcinogenicity (binary)	-	-	-	-	-	-	-
	Carcinogenicity (trinary)	Non-required	Non-required	Danger	Non-required	Non-required	Non-required	Non-required
	crustacea aquatic toxicity	-	-	+	+	+	+	+
	CYP1A2 inhibition	-	-	-	-	-	-	-
	CYP2C19 inhibition	-	-	-	-	+	-	-
	CYP2C9 inhibition	-	-	-	-	+	-	-
	CYP2C9 substrate	-	-	-	-	-	-	-
	CYP2D6 inhibition	-	-	-	+	-	-	-
	CYP2D6 substrate	-	-	-	-	-	-	+
	CYP3A4 inhibition	-	-	-	-	-	-	-
	CYP3A4 substrate	+	+	+	+	+	+	+
	CYP inhibitory promiscuity	-	-	-	+	+	-	-
	Eye corrosion	-	-	-	-	-	-	-
	Eye irritation	-	-	-	-	-	-	-
	Estrogen receptor binding	+	+	+	+	-	+	+
	Fish aquatic toxicity	+	+	+	+	+	+	+
	Glucocorticoid receptor binding	+	+	+	+	+	+	+
	Honey bee toxicity	+	+	+	-	-	+	+
	Hepatotoxicity	-	-	-	+	+	-	-
	Human either-a-go-go inhibition	-	-	+	+	+	+	+
	Human Intestinal Absorption	+	+	+	+	+	+	+
	Human oral bioavailability	-	+	-	-	+	-	-
	MATE1 inhibitior	-	-	-	-	-	-	-
	micronuclear	-	-	-	+	+	-	-
	Acute Oral Toxicity	2.64855	2.00673	2.46045	2.2076	1.7351	2.35795	3.25599
	OATP1B1 inhibitior	+	+	+	+	+	+	+
	OATP1B3 inhibitior	+	+	+	+	+	+	+
	OATP2B1 inhibitior	-	-	-	-	-	-	-
	OCT1 inhibitior	+	+	-	-	-	+	+
	OCT2 inhibitior	+	+	-	+	-	+	-
	P-glycoprotein inhibitior	-	-	+	+	+	+	-
	P-glycoprotein substrate	-	-	+	+	+	-	+
	PPAR gamma	+	+	+	+	-	+	+
	Plasma protein binding	1.00436	0.944944	1.05375	1.1992	0.88263	1.08149	1.0385
	Subcellular localzation	Mitochondria	Mitochondria	Mitochondria	Mitochondria	Mitochondria	Mitochondria	Mitochondria
	Tetrahymena pyriformis	1.60207	1.20041	1.97324	1.4875	0.992889	1.05047	1.37205
	Thyroid receptor binding	+	+	-	+	-	+	+
	UGT catelyzed	-	-	+	-	-	-	-
	Water solubility	-4.40696	-4.40696	-5.0335	-3.1244	-3.95661	-4.21703	-4.13473
