# Supplementary material for: wSDTNBI: a novel network-based inference method for virtual screening
Source: Royal Society of Chemistry journal article supplement (doi:10.1039/d1sc05613a), 2021-12-21
Supplement: d1sc05613a3.pdf [file d1sc05613a3.pdf]

Supplementary Information for  
**“wSDTNBI: a novel network-based inference method  
for virtual screening”**

**Contents**

|                                                   |           |
|---------------------------------------------------|-----------|
| <b>Supplementary Methods.....</b>                 | <b>2</b>  |
| Description of resource-spreading processes ..... | 2         |
| Calculation of NBI scores .....                   | 3         |
| Calculation of SDTNBI scores.....                 | 4         |
| Calculation of bSDTNBI scores.....                | 5         |
| Calculation of wSDTNBI scores.....                | 8         |
| References .....                                  | 10        |
| <b>Supplementary Figure .....</b>                 | <b>11</b> |
| Supplementary Fig. S1. ....                       | 11        |
| <b>Supplementary Tables .....</b>                 | <b>12</b> |
| Supplementary Table S1. ....                      | 12        |
| Supplementary Table S2. ....                      | 13        |
| Supplementary Table S3. ....                      | 14        |
| Supplementary Table S4. ....                      | 15        |
| Supplementary Table S5. ....                      | 16        |
| Supplementary Table S6. ....                      | 17        |

## Supplementary Methods

### Description of resource-spreading processes

To describe the four network-based methods used in this study (*i.e.*, NBI, SDTNBI, bSDTNBI and wSDTNBI) in a uniform way, it is necessary to focus on their common features. As mentioned in our previous studies,<sup>1-5</sup> NBI calculates prediction scores by simulating resource-spreading processes on a given DTI network, while SDTNBI and bSDTNBI calculate prediction scores by simulating resource-spreading processes on a given substructure-drug-target network. The newly developed wSDTNBI is based on bSDTNBI, and hence also based on resource-spreading processes. It is obvious that performing resource-spreading processes on networks is one of the most common features of the four network-based methods. Mathematically, resource-spreading processes can be described by matrix multiplication:

$$C = A \times W^k \quad (1)$$

Among the three matrices in this equation,  $A$  is the initial resource matrix describing the state of resource allocation before resource-spreading processes,  $W$  is the transfer matrix describing a resource-spreading process,  $k$  is the number of resource-spreading processes, and  $C$  is the final resource matrix describing the state of resource allocation after resource-spreading processes. As mentioned in our previous studies,<sup>2-5</sup> the value of  $k$  is set as 2 in this study.

To ensure the total amount of resources remains constant in resource-spreading processes, the sum of each row in  $W$  should be normalized to 1 before resource-spreading processes. It is noteworthy that rows full of zeros should not be normalized to avoid division by zero. Assuming that  $B$  is a non-normalized transfer matrix, the normalization of  $B$  and generation of  $W$  can be described as:

$$W(i,j) = \begin{cases} \frac{B(i,j)}{\sum_l B(i,l)} & \text{if } \sum_l B(i,l) \neq 0 \\ 0 & \text{otherwise} \end{cases} \quad (2)$$

For convenience of use, the aforementioned matrix normalization and matrix multiplication are combined and expressed as a function  $f(A,B)$ , which outputs a final

resource matrix after inputting an initial resource matrix  $A$  and a non-normalized transfer matrix  $B$ . The details of this function can be presented in pseudo code:

```
Matrix f(Matrix A, Matrix B) {
    for (int i : B.rows()) { // for each row in B
        float sum = 0;
        for (int j : B.columns()) {
            sum += B(i, j);
        }
        if (sum != 0) { // to avoid division by zero
            for (int j : B.columns()) {
                B(i, j) /= sum;
            }
        }
    }
    return A × B × B; // k = 2
}
```

With the support of this function, the four network-based methods are described in order from simple to complex, namely “NBI → SDTNBI → bSDTNBI → wSDTNBI” in the following sections.

### Calculation of NBI scores

Among the four network-based methods, NBI is the simplest one. An unweighted DTI network is used as the only input.<sup>1</sup>

Denoting zero matrices as  $O$ , the initial resource matrix is defined as:

$$A_{NBI} = \begin{bmatrix} O & A_{DTI} \\ (A_{DTI})^T & O \end{bmatrix} \quad (3)$$

Then, the non-normalized transfer matrix is simply defined as:

$$B_{NBI} = A_{NBI} \quad (4)$$

Lastly, the final resource matrix is calculated as:

$$C_{NBI} = f(A_{NBI}, B_{NBI}) \quad (5)$$

The value of  $C_{NBI}(i, N_D + j)$  is the NBI score for the interaction between drug  $D_i$  and target  $T_j$ . From these equations, it is easy to find that NBI only relies on the topological

information of the inputted DTI network and hence cannot predict potential targets for novel compounds outside the DTI network.

### Calculation of SDTNBI scores

As an improved version of NBI, SDTNBI is more complex. Both an unweighted DTI network and a DSA network are used as inputs.<sup>2</sup> Substructures in the DSA network are used to bridge the gap between the DTI network and novel compounds outside the DTI network. Hence, SDTNBI can predict potential targets for not only drugs in the DTI network but also novel compounds.

At first, the initial resource matrix is defined as:

$$A_{SDTNBI} = \begin{bmatrix} O & A_{DSA} & A_{DTI} \\ (A_{DSA})^T & O & O \\ (A_{DTI})^T & O & O \end{bmatrix} \quad (6)$$

Then, two matrices similar to  $A_{DTI}$  and  $A_{DSA}$  are defined as:

$$B_{DTI}(i,j) = \begin{cases} A_{DTI}(i,j) & \text{if } \sum_{l=1}^{N_T} A_{DTI}(i,l) \neq 0 \\ 0 & \text{otherwise} \end{cases} \quad (7)$$

$$B_{DSA}(i,j) = \begin{cases} A_{DSA}(i,j) & \text{if } \sum_{l=1}^{N_T} A_{DTI}(i,l) \neq 0 \\ 0 & \text{otherwise} \end{cases} \quad (8)$$

Compared with  $A_{DTI}$  and  $A_{DSA}$ , the rows corresponding to novel compounds (*i.e.*, compounds without any known targets) in  $B_{DTI}$  and  $B_{DSA}$  are set to zero to prevent resources from spreading back to the nodes representing novel compounds in resource-spreading processes. It is obvious that  $B_{DTI}$  is always equal to  $A_{DTI}$ , while  $B_{DSA}$  is equal to  $A_{DSA}$  only if there is no novel compound.

Based on these two matrices, the non-normalized transfer matrix  $B_{SDTNBI}$  is generated as:

$$B_{SDTNBI} = \begin{bmatrix} O & B_{DSA} & B_{DTI} \\ (B_{DSA})^T & O & O \\ (B_{DTI})^T & O & O \end{bmatrix} \quad (9)$$

The generation of  $B_{SDTNBI}$  can also be viewed as a transformation from  $A_{SDTNBI}$  to

$B_{SDTNBI}$ . To describe the transformation in more details, three sets are defined. Among them,  $I_D$  is a set containing the indices of the rows corresponding to the  $N_D$  drugs in  $A_{SDTNBI}$ , namely all integers in the interval  $(0, N_D]$ . The row indices in this set are also the column indices of the  $N_D$  drugs in  $A_{SDTNBI}$ , because  $A_{SDTNBI}$  is a symmetric matrix. Similarly,  $I_S$  is a set containing the indices corresponding to the  $N_S$  substructures in  $A_{SDTNBI}$ , namely all integers in the interval  $(N_D, N_D + N_S]$ .  $I_T$  is the set containing the indices corresponding to the  $N_T$  targets in  $A_{SDTNBI}$ , namely all integers in the interval  $(N_D + N_S, N_D + N_S + N_T]$ . Using these three sets, the transformation from  $A_{SDTNBI}$  to  $B_{SDTNBI}$  can be presented in pseudo code:

```

Matrix BSDTNBI = ASDTNBI;
for (int i : ID) {
    float sum = 0;
    for (int j : IT) { // to count the number of known targets
        sum += ASDTNBI(i, j);
    }
    if (sum == 0) { // if this is a novel compound
        for (int l : BSDTNBI.columns()) {
            BSDTNBI(i, l) = 0;
            BSDTNBI(l, i) = 0;
        }
    }
}

```

Lastly, the final resource matrix is calculated as:

$$C_{SDTNBI} = f(A_{SDTNBI}, B_{SDTNBI}) \quad (10)$$

The value of  $C_{SDTNBI}(i, N_D + N_S + j)$  is the SDTNBI score for the interaction between drug  $D_i$  and target  $T_j$ .

### Calculation of bSDTNBI scores

As an improved version of SDTNBI, bSDTNBI is more complex. Three tunable parameters  $\alpha \in [0, 1]$ ,  $\beta \in [0, 1]$  and  $\gamma \in (-\infty, +\infty)$  are introduced to address potential imbalances and improve performance.<sup>3-5</sup>

At first, two matrices are defined using  $A_{DTI}$ ,  $A_{DSA}$  and parameter  $\alpha$ :

$$A_{DSA}'(i,j) = \alpha \cdot \frac{A_{DSA}(i,j)}{\sum_{l=1}^{N_S} A_{DSA}(i,l)} \quad (11)$$

$$A_{DTI}'(i,j) = (1 - \alpha) \cdot \frac{A_{DTI}(i,j)}{\sum_{l=1}^{N_T} A_{DTI}(i,l)} \quad (12)$$

Based on these two matrices, the initial resource matrix is defined as:

$$A_{bSDTNBI} = \begin{bmatrix} 0 & A_{DSA}' & A_{DTI}' \\ (A_{DSA}')^T & 0 & 0 \\ (A_{DTI}')^T & 0 & 0 \end{bmatrix} \quad (13)$$

From these equation, it is easy to find that parameter  $\alpha$  is used to adjust the initial resources allocated to different types of nodes. A smaller  $\alpha$  value means that less resources will be allocated to substructure nodes and more resources will be allocated to target nodes. A larger  $\alpha$  value means that more resources will be allocated to substructure nodes and less resources will be allocated to target nodes.

The generation of  $A_{bSDTNBI}$  can also be viewed as a transformation from the aforementioned  $A_{SDTNBI}$  to  $A_{bSDTNBI}$ . The details of this transformation can be presented in pseudo code:

```

Matrix  $A_{bSDTNBI} = A_{SDTNBI}$ ;
for (int i :  $I_D$ ) {
    float sum = 0;
    for (int j :  $I_S$ ) {
        sum +=  $A_{bSDTNBI}(i, j)$ ;
    }
    if (sum != 0) {
        for (int j :  $I_S$ ) { // for each DSA
             $A_{bSDTNBI}(i, j) *= \alpha / \text{sum}$ ;
        }
    }
    sum = 0;
    for (int j :  $I_T$ ) {
        sum +=  $A_{bSDTNBI}(i, j)$ ;
    }
    if (sum != 0) {
        for (int j :  $I_T$ ) { // for each DTI

```

```

        AbSDTNBI(i, j) *= (1 - α) / sum;
    }
}

```

Then, the non-normalized transfer matrix is generated using the aforementioned  $B_{DTI}$ ,  $B_{DSA}$  and the other two parameters  $\beta$  and  $\gamma$ :

$$B_{bSDTNBI} = \begin{bmatrix} 0 & \beta \cdot B_{DSA} & (1 - \beta) \cdot B_{DTI} \\ \beta \cdot (B_{DSA})^T & 0 & 0 \\ (1 - \beta) \cdot (B_{DTI})^T & 0 & 0 \end{bmatrix} \quad (14)$$

$$B_{bSDTNBI}(i, j) = B_{bSDTNBI}(i, j) \cdot \left[ \sum_{l=1}^{N_D + N_S + N_T} B_{bSDTNBI}(l, j) \right]^\gamma \quad (15)$$

Among the two parameters,  $\beta$  is used to adjust the weights of different types of edges. A smaller  $\beta$  value means that smaller weights will be assigned to the edges representing DSAs and larger weights will be assigned to the edges representing DTIs. A larger  $\beta$  value means that larger weights will be assigned to the edges representing DSAs and less weights will be assigned to the edges representing DTIs. Meanwhile, parameter  $\gamma$  is used to adjust the influence of hub nodes (*i.e.*, nodes with high degree). A positive  $\gamma$  value means that the influence of hub nodes will be strengthen, while a negative  $\gamma$  value means that the influence of hub nodes will be weaken.

The generation of  $B_{bSDTNBI}$  can also be viewed as a transformation from the aforementioned  $B_{SDTNBI}$  to  $B_{bSDTNBI}$ . The details of this transformation be presented in pseudo code:

```

Matrix BbSDTNBI = BSDTNBI;
for (int i : ID) {
    for (int j : IS) { // for each DSA
        BbSDTNBI(i, j) *= β;
        BbSDTNBI(j, i) *= β;
    }
    for (int j : IT) { // for each DTI
        BbSDTNBI(i, j) *= 1 - β;
        BbSDTNBI(j, i) *= 1 - β;
    }
}
for (int j : BbSDTNBI.columns()) {

```

```

float sum = 0;
for (int i : BbSDTNBI.rows()) {
    sum += BbSDTNBI(i, j);
}
if (sum != 0) {
    for (int i : BbSDTNBI.rows()) {
        BbSDTNBI(i, j) *= pow(sum, γ);
    }
}
}

```

Lastly, the final resource matrix is calculated as:

$$C_{bSDTNBI} = f(A_{bSDTNBI}, B_{bSDTNBI}) \quad (16)$$

The value of  $C_{bSDTNBI}(i, N_D + N_S + j)$  is the bSDTNBI score for the interaction between drug  $D_i$  and target  $T_j$ .

### Calculation of wSDTNBI scores

As mentioned in the main text, wSDTNBI scores are calculated based on bSDTNBI scores. At first, the normalization of bSDTNBI scores in  $C_{bSDTNBI}$  can be presented in pseudo code:

```

Matrix CwSDTNBI = CbSDTNBI;
for (int i : ID) {
    int n = 0;
    vector<float> v;
    for (int j : IT) { // to count the number of known targets
        if (WDTI(i, j) != 0) {
            ++n;
        }
        v.emplace_back(CwSDTNBI(i, j));
    }
    stable_sort(v.begin(), v.end(), greater<float>());
    const float threshold = v[n + δ]; // the (n + δ)-th largest
    for (int j : IT) {
        if (CwSDTNBI(i, j) > threshold) {
            CwSDTNBI(i, j) = 1;
        } else {

```

```

        CwSDTNBI(i, j) /= threshold;
    }
}

```

In this step, parameter  $\delta$  is used to adjust the distribution of normalized scores. Specifically, a smaller  $\delta$  value means that less scores will be normalized to 1, while a larger  $\delta$  value means that more scores will be normalized to 1. After this step, the value of  $C_{wSDTNBI}(i, N_D + N_S + j)$  is the normalized bSDTNBI score for the interaction between drug  $D_i$  and target  $T_j$ .

Then, considering that  $A_{DSA}$  contains the molecular fingerprints of all drugs, the Tanimoto coefficients of all possible drug pairs can be calculated as:

$$D = A_{DSA} \times (A_{DSA})^T \quad (17)$$

$$T_c(i, j) = \frac{D(i, j)}{D(i, i) + D(j, j) - D(i, j)} \quad (18)$$

The value of  $T_c(i, j)$  is the Tanimoto coefficient between two drugs  $D_i$  and  $D_j$ , which measures the drug similarity between these two drugs.

Lastly, using drug similarity matrix  $T_c$  in combination with  $W_{DTI}$ , the normalized bSDTNBI scores in  $C_{wSDTNBI}$  can be further transformed into wSDTNBI scores. The details of this transformation can be presented in pseudo code:

```

for (int j : IT) {
    vector<int> IL;
    for (int i : ID) {
        if (WDTI(i, j) != 0) {
            IL.emplace_back(i);
        }
    }
    for (int i : ID) { // to select ε reference ligands
        set<pair<float, float>> pair_set;
        for (int l : IL) {
            const auto pair = make_pair(Tc(i, l), WDTI(l, j));
            if (pair_set.size() < ε) {
                pair_set.emplace(pair);
            } else if (pair.first > pair_set.begin()->first) {
                pair_set.erase(pair_set.begin());
            }
        }
    }
}

```

```

        pair_set.emplace(pair);
    }
}
if (!pair_set.empty()) {
    float sum = 0;
    for (const auto pair : pair_set) {
        sum += pair.second;
    }
    // wSDTNBI score = normalized bSDTNBI score
    //                  × similarity-based score
    CwSDTNBI(i, j) *= sum / pair_set.size();
} else {
    CwSDTNBI(i, j) = 0;
}
}
}

```

In this step, parameter  $\varepsilon$  is used to adjust the number of reference ligands, which is similar to the parameter  $K$  in  $K$ -nearest neighbor method. After this step, the value of  $C_{wSDTNBI}(i, N_D + N_S + j)$  is the wSDTNBI score for the interaction between drug  $D_i$  and target  $T_j$ .

## References

- 1 F. X. Cheng, C. Liu, J. Jiang, W. Q. Lu, W. H. Li, G. X. Liu, W. X. Zhou, J. Huang and Y. Tang, *PLoS Comput. Biol.*, 2012, **8**, e1002503.
- 2 Z. R. Wu, F. X. Cheng, J. Li, W. H. Li, G. X. Liu and Y. Tang, *Brief. Bioinform.*, 2017, **18**, 333-347.
- 3 Z. R. Wu, W. Q. Lu, D. Wu, A. Q. Luo, H. P. Bian, J. Li, W. H. Li, G. X. Liu, J. Huang, F. X. Cheng and Y. Tang, *Br. J. Pharmacol.*, 2016, **173**, 3372-3385.
- 4 J. S. Fang, Z. R. Wu, C. P. Cai, Q. Wang, Y. Tang and F. X. Cheng, *J. Chem Inf. Model.*, 2017, **57**, 2657-2671.
- 5 Z. R. Wu, W. Q. Lu, W. W. Yu, T. D. Y. Wang, W. H. Li, G. X. Liu, H. K. Zhang, X. F. Pang, J. Huang, M. Y. Liu, F. X. Cheng and Y. Tang, *Pharmacol. Res.*, 2018, **129**, 400-413.

## Supplementary Figure

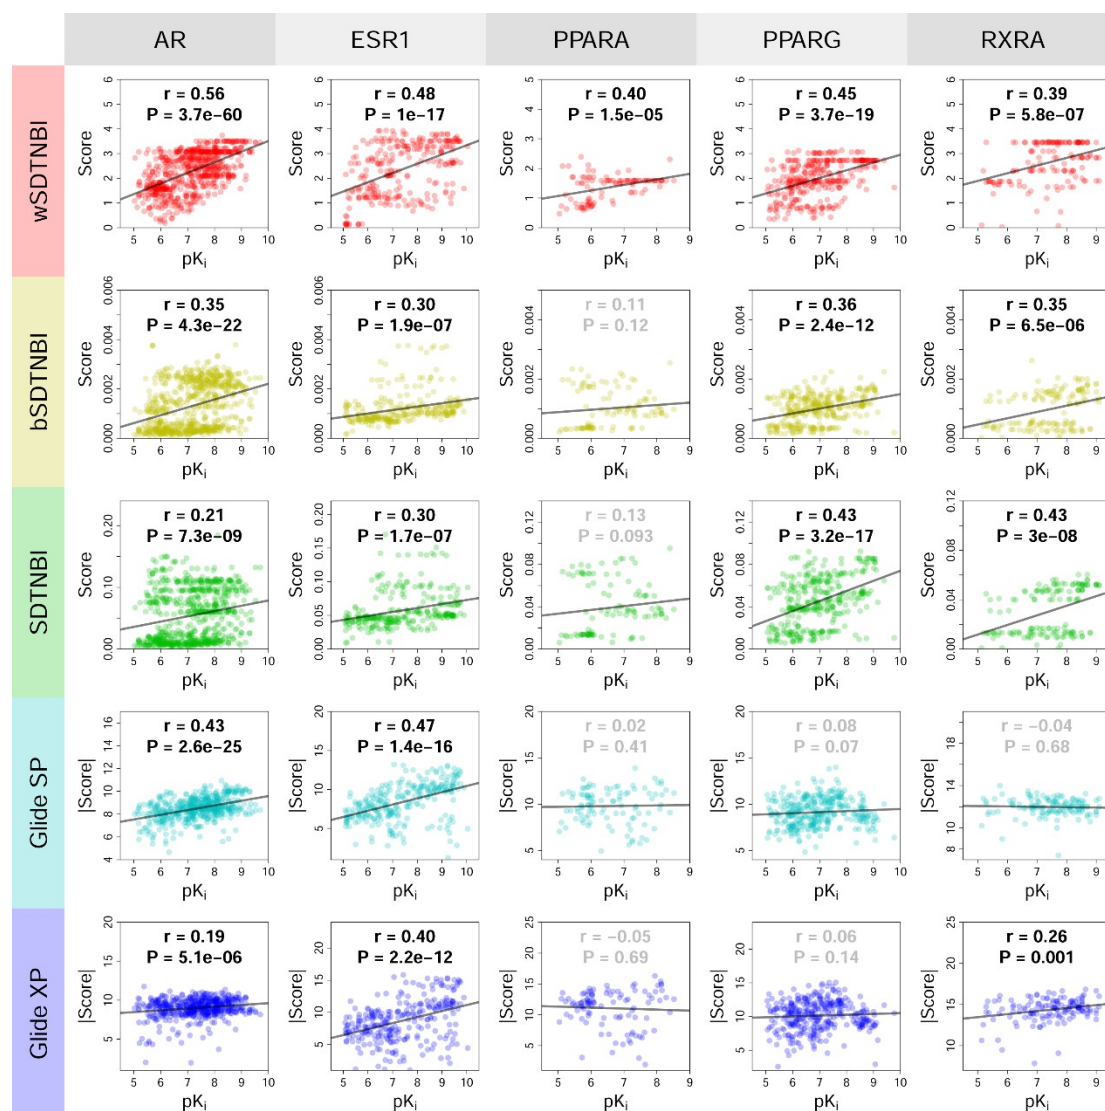

**Supplementary Fig. S1.** The correlation between prediction scores and  $pK_i$  values in external validation. Data points calculated by wSDTNBI, bSDTNBI, SDTNBI, Glide SP and Glide XP were colored by red, yellow, green, cyan and blue, respectively. Pearson correlation coefficients ( $r$ ) and  $P$  values were calculated by the Pearson correlation test in R (version 3.3.3).

## Supplementary Tables

**Supplementary Table S1.** The statistics of the DSA networks constructed by generating different types of molecular fingerprints for the drugs in local and global DTI networks.

| Network | Fingerprint | N <sub>D</sub> | N <sub>S</sub> | N <sub>DSA</sub> | Sparsity (%) |
|---------|-------------|----------------|----------------|------------------|--------------|
| Local   | ECFP_0      | 5,560          | 69             | 51,163           | 13.34        |
|         | ECFP_2      | 5,560          | 2,878          | 146,087          | 0.91         |
|         | ECFP_4      | 5,560          | 24,444         | 241,833          | 0.18         |
|         | ECFP_6      | 5,560          | 66,130         | 332,205          | 0.09         |
|         | FCFP_0      | 5,560          | 13             | 26,396           | 36.52        |
|         | FCFP_2      | 5,560          | 377            | 100,713          | 4.80         |
|         | FCFP_4      | 5,560          | 8,172          | 188,833          | 0.42         |
|         | FCFP_6      | 5,560          | 36,915         | 277,353          | 0.14         |
|         | FP4         | 5,560          | 173            | 79,441           | 8.26         |
|         | KR          | 5,560          | 2,411          | 294,385          | 2.20         |
|         | MACCS       | 5,560          | 156            | 255,639          | 29.47        |
|         | PubChem     | 5,560          | 683            | 757,050          | 19.94        |
| Global  | ECFP_0      | 12,751         | 92             | 116,976          | 9.97         |
|         | ECFP_2      | 12,751         | 4,061          | 336,582          | 0.65         |
|         | ECFP_4      | 12,751         | 44,076         | 559,884          | 0.10         |
|         | ECFP_6      | 12,751         | 132,363        | 770,680          | 0.05         |
|         | FCFP_0      | 12,751         | 19             | 60,407           | 24.93        |
|         | FCFP_2      | 12,751         | 480            | 231,821          | 3.79         |
|         | FCFP_4      | 12,751         | 13,180         | 437,364          | 0.26         |
|         | FCFP_6      | 12,751         | 70,859         | 644,046          | 0.07         |
|         | FP4         | 12,751         | 190            | 183,142          | 7.56         |
|         | KR          | 12,751         | 2,868          | 651,086          | 1.78         |
|         | MACCS       | 12,751         | 157            | 582,725          | 29.11        |
|         | PubChem     | 12,751         | 706            | 1,775,375        | 19.72        |

N<sub>D</sub>: the number of drugs, N<sub>S</sub>: the number of substructures, N<sub>DSA</sub>: the number of DSAs. The network sparsity is the ratio of the number of known edges (*i.e.*, N<sub>DSA</sub>) to the

number of all possible edges (*i.e.*,  $N_D \times N_T$ ).

**Supplementary Table S2.** The optimized parameters for bSDTNBI and wSDTNBI models.

| Network | Fingerprint | $\alpha$ | $\beta$ | $\gamma$ | $\delta$ | $\varepsilon$ |
|---------|-------------|----------|---------|----------|----------|---------------|
| Local   | ECFP_0      | 0.2      | 0.9     | -0.7     | 20       | 3             |
|         | ECFP_2      | 0.3      | 0.1     | -0.6     | 20       | 3             |
|         | FCFP_0      | 0.1      | 0.1     | -0.6     | 20       | 3             |
|         | FCFP_2      | 0.3      | 0.6     | -0.7     | 20       | 3             |
|         | FCFP_4      | 0.4      | 0.1     | -0.6     | 20       | 3             |
|         | FP4         | 0.3      | 0.8     | -0.7     | 20       | 3             |
|         | KR          | 0.3      | 0.1     | -0.6     | 20       | 3             |
|         | MACCS       | 0.2      | 0.2     | -0.7     | 20       | 3             |
|         | PubChem     | 0.4      | 0.1     | -0.7     | 20       | 3             |
| Global  | ECFP_0      | 0.2      | 0.9     | -0.6     | 20       | 4             |
|         | ECFP_2      | 0.3      | 0.3     | -0.5     | 20       | 4             |
|         | FCFP_0      | 0.2      | 0.9     | -0.6     | 20       | 4             |
|         | FCFP_2      | 0.4      | 0.9     | -0.6     | 20       | 4             |
|         | FCFP_4      | 0.4      | 0.2     | -0.5     | 20       | 4             |
|         | FP4         | 0.3      | 0.9     | -0.6     | 20       | 4             |
|         | KR          | 0.4      | 0.3     | -0.6     | 20       | 4             |
|         | MACCS       | 0.4      | 0.9     | -0.7     | 20       | 4             |
|         | PubChem     | 0.5      | 0.4     | -0.7     | 20       | 4             |

bSDTNBI models only use  $\alpha$ ,  $\beta$  and  $\gamma$ , while wSDTNBI models use all the five parameters.

**Supplementary Table S3.** The evaluation indicators of local models in 10-fold cross validation.

| Method  | Fingerprint | R (L = 20)  | $e_R$ (L = 20) | AUROC       | r            | MAE       | RMSE      |
|---------|-------------|-------------|----------------|-------------|--------------|-----------|-----------|
| wSDTNBI | ECFP_0      | 0.550±0.012 | 25.9±0.6       | 0.953±0.002 | 0.458±0.020  | 0.88±0.02 | 1.17±0.02 |
|         | ECFP_2      | 0.592±0.013 | 27.9±0.6       | 0.959±0.002 | 0.555±0.017  | 0.80±0.01 | 1.07±0.02 |
|         | FCFP_0      | 0.515±0.012 | 24.3±0.6       | 0.951±0.002 | 0.319±0.024  | 0.99±0.02 | 1.30±0.02 |
|         | FCFP_2      | 0.558±0.013 | 26.3±0.6       | 0.954±0.002 | 0.512±0.022  | 0.83±0.02 | 1.11±0.02 |
|         | FCFP_4      | 0.588±0.013 | 27.7±0.7       | 0.959±0.002 | 0.557±0.020  | 0.80±0.02 | 1.07±0.02 |
|         | FP4         | 0.555±0.011 | 26.2±0.6       | 0.953±0.002 | 0.474±0.020  | 0.86±0.02 | 1.15±0.02 |
|         | KR          | 0.579±0.013 | 27.3±0.6       | 0.958±0.002 | 0.529±0.021  | 0.82±0.02 | 1.09±0.02 |
|         | MACCS       | 0.555±0.013 | 26.2±0.6       | 0.951±0.002 | 0.487±0.020  | 0.85±0.02 | 1.14±0.02 |
|         | PubChem     | 0.534±0.012 | 25.2±0.6       | 0.947±0.002 | 0.487±0.020  | 0.85±0.02 | 1.14±0.02 |
| bSDTNBI | ECFP_0      | 0.818±0.009 | 38.6±0.5       | 0.975±0.002 | 0.139±0.026  | 1.86±0.03 | 2.22±0.03 |
|         | ECFP_2      | 0.886±0.007 | 41.8±0.4       | 0.982±0.002 | 0.136±0.025  | 1.87±0.03 | 2.23±0.03 |
|         | FCFP_0      | 0.797±0.009 | 37.6±0.5       | 0.972±0.002 | 0.153±0.025  | 1.84±0.03 | 2.20±0.03 |
|         | FCFP_2      | 0.847±0.008 | 39.9±0.4       | 0.979±0.002 | 0.134±0.025  | 1.86±0.03 | 2.23±0.03 |
|         | FCFP_4      | 0.894±0.007 | 42.2±0.4       | 0.983±0.002 | 0.123±0.024  | 1.87±0.03 | 2.24±0.03 |
|         | FP4         | 0.830±0.008 | 39.2±0.4       | 0.977±0.002 | 0.141±0.026  | 1.86±0.03 | 2.23±0.03 |
|         | KR          | 0.869±0.008 | 41.0±0.4       | 0.981±0.002 | 0.121±0.023  | 1.87±0.03 | 2.23±0.03 |
|         | MACCS       | 0.814±0.009 | 38.4±0.5       | 0.975±0.002 | 0.140±0.025  | 1.86±0.03 | 2.22±0.03 |
|         | PubChem     | 0.816±0.009 | 38.5±0.5       | 0.976±0.002 | 0.123±0.025  | 1.87±0.03 | 2.23±0.03 |
| SDTNBI  | ECFP_0      | 0.754±0.010 | 35.6±0.5       | 0.968±0.002 | -0.010±0.022 | 1.75±0.03 | 2.14±0.03 |
|         | ECFP_2      | 0.793±0.010 | 37.4±0.5       | 0.974±0.002 | 0.051±0.021  | 1.77±0.03 | 2.15±0.03 |
|         | FCFP_0      | 0.757±0.010 | 35.7±0.5       | 0.966±0.002 | 0.003±0.022  | 1.72±0.03 | 2.11±0.03 |
|         | FCFP_2      | 0.743±0.010 | 35.1±0.5       | 0.969±0.002 | -0.001±0.021 | 1.77±0.03 | 2.15±0.03 |
|         | FCFP_4      | 0.821±0.009 | 38.7±0.5       | 0.975±0.002 | 0.105±0.021  | 1.77±0.03 | 2.15±0.03 |
|         | FP4         | 0.745±0.010 | 35.1±0.5       | 0.968±0.002 | -0.008±0.021 | 1.77±0.03 | 2.15±0.03 |
|         | KR          | 0.725±0.012 | 34.2±0.6       | 0.969±0.002 | 0.034±0.021  | 1.79±0.03 | 2.17±0.03 |
|         | MACCS       | 0.619±0.011 | 29.2±0.5       | 0.956±0.002 | -0.011±0.021 | 1.81±0.03 | 2.19±0.03 |
|         | PubChem     | 0.544±0.011 | 25.7±0.5       | 0.947±0.003 | 0.009±0.023  | 1.84±0.03 | 2.21±0.03 |
| NBI     |             | 0.901±0.007 | 42.5±0.4       | 0.981±0.002 | 0.115±0.024  | 1.55±0.03 | 1.94±0.03 |

**Supplementary Table S4.** The evaluation indicators of global models in 10-fold cross validation.

| Method  | Fingerprint | R (L = 20)  | $e_R$ (L = 20) | AUROC       | r           | MAE       | RMSE      |
|---------|-------------|-------------|----------------|-------------|-------------|-----------|-----------|
| wSDTNBI | ECFP_0      | 0.459±0.009 | 41.5±0.8       | 0.950±0.002 | 0.469±0.012 | 0.84±0.01 | 1.12±0.02 |
|         | ECFP_2      | 0.509±0.008 | 46.0±0.8       | 0.957±0.001 | 0.545±0.010 | 0.78±0.01 | 1.04±0.01 |
|         | FCFP_0      | 0.404±0.008 | 36.5±0.7       | 0.945±0.002 | 0.372±0.014 | 0.91±0.01 | 1.21±0.02 |
|         | FCFP_2      | 0.459±0.009 | 41.5±0.8       | 0.950±0.002 | 0.514±0.012 | 0.80±0.01 | 1.07±0.01 |
|         | FCFP_4      | 0.510±0.009 | 46.1±0.8       | 0.958±0.001 | 0.552±0.011 | 0.77±0.01 | 1.04±0.01 |
|         | FP4         | 0.460±0.010 | 41.5±0.9       | 0.950±0.002 | 0.485±0.012 | 0.82±0.01 | 1.10±0.02 |
|         | KR          | 0.478±0.008 | 43.2±0.8       | 0.953±0.001 | 0.523±0.011 | 0.80±0.01 | 1.06±0.02 |
|         | MACCS       | 0.434±0.008 | 39.2±0.8       | 0.943±0.002 | 0.488±0.012 | 0.82±0.01 | 1.10±0.02 |
|         | PubChem     | 0.422±0.009 | 38.2±0.8       | 0.940±0.002 | 0.493±0.012 | 0.82±0.01 | 1.09±0.02 |
| bSDTNBI | ECFP_0      | 0.701±0.007 | 63.3±0.7       | 0.968±0.001 | 0.149±0.015 | 1.61±0.02 | 2.00±0.02 |
|         | ECFP_2      | 0.780±0.007 | 70.6±0.7       | 0.975±0.001 | 0.146±0.015 | 1.62±0.02 | 2.01±0.02 |
|         | FCFP_0      | 0.675±0.008 | 61.0±0.8       | 0.965±0.001 | 0.155±0.015 | 1.61±0.02 | 2.00±0.02 |
|         | FCFP_2      | 0.731±0.007 | 66.0±0.7       | 0.972±0.001 | 0.135±0.015 | 1.62±0.02 | 2.01±0.02 |
|         | FCFP_4      | 0.799±0.007 | 72.2±0.7       | 0.976±0.001 | 0.145±0.015 | 1.62±0.02 | 2.01±0.02 |
|         | FP4         | 0.711±0.007 | 64.2±0.7       | 0.970±0.001 | 0.149±0.015 | 1.62±0.02 | 2.00±0.02 |
|         | KR          | 0.759±0.008 | 68.7±0.7       | 0.974±0.001 | 0.125±0.014 | 1.62±0.02 | 2.01±0.02 |
|         | MACCS       | 0.687±0.008 | 62.1±0.8       | 0.968±0.001 | 0.135±0.015 | 1.62±0.02 | 2.01±0.02 |
|         | PubChem     | 0.690±0.008 | 62.4±0.8       | 0.969±0.001 | 0.129±0.015 | 1.62±0.02 | 2.01±0.02 |
| SDTNBI  | ECFP_0      | 0.641±0.009 | 58.0±0.8       | 0.961±0.002 | 0.054±0.014 | 1.51±0.02 | 1.92±0.02 |
|         | ECFP_2      | 0.699±0.007 | 63.2±0.7       | 0.967±0.001 | 0.065±0.014 | 1.53±0.02 | 1.94±0.02 |
|         | FCFP_0      | 0.640±0.009 | 57.9±0.8       | 0.960±0.002 | 0.070±0.013 | 1.50±0.02 | 1.90±0.02 |
|         | FCFP_2      | 0.644±0.007 | 58.2±0.7       | 0.963±0.001 | 0.047±0.014 | 1.53±0.02 | 1.94±0.02 |
|         | FCFP_4      | 0.731±0.007 | 66.1±0.7       | 0.969±0.001 | 0.094±0.014 | 1.53±0.02 | 1.93±0.02 |
|         | FP4         | 0.633±0.008 | 57.3±0.8       | 0.961±0.001 | 0.048±0.014 | 1.52±0.02 | 1.93±0.02 |
|         | KR          | 0.631±0.009 | 57.1±0.8       | 0.963±0.001 | 0.048±0.014 | 1.55±0.02 | 1.95±0.02 |
|         | MACCS       | 0.512±0.008 | 46.3±0.8       | 0.950±0.002 | 0.027±0.014 | 1.56±0.02 | 1.96±0.02 |
|         | PubChem     | 0.401±0.008 | 36.2±0.7       | 0.941±0.002 | 0.020±0.014 | 1.59±0.02 | 1.98±0.02 |
| NBI     |             | 0.795±0.007 | 71.9±0.7       | 0.969±0.002 | 0.174±0.015 | 1.37±0.02 | 1.77±0.02 |

**Supplementary Table S5.** The statistics of our cocrystal structure.

| Ligand name             | Ursonic acid                     |
|-------------------------|----------------------------------|
| PDB No.                 | 6J3N                             |
| Data collection         |                                  |
| Space group             | P4 <sub>1</sub> 2 <sub>1</sub> 2 |
| Cell dimensions         |                                  |
| a, b, c (Å)             | 61.93 61.93 155.87               |
| α, β, γ (°)             | 90.0 90.0 90.0                   |
| Temperature (K)         | 100                              |
| Wavelength (Å)          | 0.979176                         |
| Resolution (Å)          | 61.93 - 1.99                     |
| No. reflections         | 21604 (2098)                     |
| I / σI                  | 19.600 (43.000)                  |
| Completeness (%)        | 99.9 (99.8)                      |
| Multiplicity            | 24.8 (19.1)                      |
| Rmerge                  | 0.107 (0.050)                    |
| Refinement              |                                  |
| Resolution (Å)          | 48.49 - 1.99                     |
| No. reflections         | 21604 (2098)                     |
| Rwork / Rfree           | 0.1992 / 0.2333                  |
| No. atoms               |                                  |
| Protein                 | 2048                             |
| Ligand / ion            | 33                               |
| Water                   | 82                               |
| R.m.s. deviations       |                                  |
| Bond lengths (Å)        | 0.41                             |
| Bond angles (°)         | 0.002                            |
| Ramachandran statistics |                                  |
| Favoured                | 246                              |
| Allowed                 | 4                                |
| Outliers                | 0                                |

**Supplementary Table S6.** The results of the method comparison using our newly discovered ROR $\gamma$ t ligands.

| Method type                | Method name and parameters                                      | U* O* C* A* B* S* V* |
|----------------------------|-----------------------------------------------------------------|----------------------|
| Pharmacophore-based        | PharmMapper (Human protein targets only, v2010)                 | × × × × × × ×        |
|                            | PharmMapper (All targets, v2010)                                | × × × × × × ×        |
|                            | PharmMapper (Druggable pharmacophore models, 2017)              | × × × × × × ×        |
|                            | PharmMapper (Pharmacophore models whose $K_d \geq 6.0$ , v2017) | × × × × × × ×        |
| 2D similarity-based        | SEA (Atom-pair / dipole-pair fingerprint)                       | × × × × × × ×        |
|                            | SEA (Extended connectivity fingerprint)                         | × × × × × × ×        |
| 3D similarity-based        | ChemMapper (BindingDB)                                          | × × × × × × ×        |
|                            | ChemMapper (ChEMBL)                                             | × × × × × × ×        |
|                            | ChemMapper (DrugBank)                                           | × × × × × × ×        |
|                            | ChemMapper (KEGG)                                               | × × × × × × ×        |
|                            | ChemMapper (PDB)                                                | × × × × × √ √        |
| 2D and 3D similarity-based | SwissTargetPrediction                                           | √ √ × × × × √        |
| Machine learning-based     | TargetHunter                                                    | × × × × √ × ×        |
|                            | TargetNet (Daylight fingerprint)                                | × × × × × × ×        |
|                            | TargetNet (ECFP2 fingerprint)                                   | × × × × × × ×        |
|                            | TargetNet (ECFP4 fingerprint)                                   | × × × × × × ×        |
|                            | TargetNet (ECFP6 fingerprint)                                   | × × × × × × ×        |
| Network-based              | NBI (Global-NBI)                                                | × × × √ × × ×        |
|                            | SDTNBI (Global-SDTNBI-FCFP_4)                                   | √ × × × × × ×        |
|                            | bSDTNBI (Global-bSDTNBI-FCFP_4)                                 | √ × × √ √ × √        |
|                            | wSDTNBI (Global-wSDTNBI-FCFP_4)                                 | √ √ √ √ √ √ √        |

U\*: Ursonic acid, O\*: Oleanonic acid, C\*: Ciclesonide, A\*: AKT inhibitor VIII, B\*: BX-471, S\*: Spironolactone, V\*: Veratramine.
